# Supplementary material for: Sporadic Parkinson’s disease derived neuronal cells show disease-specific mRNA and small RNA signatures with abundant deregulation of piRNAs
Source: Acta Neuropathol Commun. 2018 Jul 10;6:58. doi: 10.1186/s40478-018-0561-x (PMC6038190; doi:10.1186/s40478-018-0561-x)
Supplement: Supplementary file 7 — Table S4. Differential expression analysis for mature miRNAs in fibroblasts, iPSCs/ESCs and neurons for the comparison PD vs. CTRL. (XLSX 718 kb) [file 40478_2018_561_MOESM7_ESM.xlsx]

## Sheet: fibroblasts
mature miRNA name	baseMean	log2FoldChange	lfcSE	stat	pvalue	padj
hsa-miR-196a-5p	743.575	-2.87828	0.730603	-3.93959	8.16214e-05	0.0198358
hsa-miR-7108-5p	155.453	2.58203	0.658864	3.91891	8.89499e-05	0.0198358
hsa-miR-5571-3p	8.64587	2.6086	0.655953	3.97681	6.98454e-05	0.0198358
hsa-miR-1301-5p	9.08254	2.12787	0.542501	3.92234	8.76947e-05	0.0198358
hsa-miR-6075	3062.14	2.87304	0.773346	3.71507	0.000203145	0.0226507
hsa-miR-718	2358.14	2.73776	0.718097	3.81252	0.00013756	0.0226507
hsa-miR-6796-3p	125.492	2.50385	0.673292	3.71882	0.000200153	0.0226507
hsa-miR-1181	2338.99	2.50267	0.67074	3.73121	0.000190563	0.0226507
hsa-miR-582-3p	29.2992	1.32985	0.366574	3.62778	0.000285868	0.0254995
hsa-miR-6879-5p	241.521	-1.53785	0.422739	-3.63782	0.000274952	0.0254995
hsa-miR-604	68.6661	1.5932	0.443449	3.59274	0.000327219	0.0265345
hsa-miR-4745-3p	23722.2	2.20927	0.629691	3.50849	0.000450652	0.0334985
hsa-miR-6813-5p	12.3297	-1.47622	0.430215	-3.43136	0.00060056	0.0412076
hsa-miR-642b-5p	16.6601	1.86191	0.55035	3.38314	0.000716623	0.0456591
hsa-miR-3939	229.126	2.32913	0.704447	3.30632	0.000945303	0.0527006
hsa-miR-663b	5129.03	2.22576	0.670714	3.31849	0.000905051	0.0527006
hsa-miR-3618	27.4807	1.15726	0.353462	3.27407	0.00106009	0.0556234
hsa-miR-5690	13.0324	1.5574	0.485416	3.20839	0.00133479	0.0591783
hsa-miR-1539	135.82	1.39786	0.435434	3.21027	0.0013261	0.0591783
hsa-miR-4454	269.494	1.58589	0.495331	3.20168	0.00136627	0.0591783
hsa-miR-30d-5p	22470	-0.706533	0.221064	-3.19605	0.00139321	0.0591783
hsa-miR-6819-3p	18.5058	1.47785	0.478383	3.08925	0.00200661	0.07975
hsa-miR-4467	50.6461	2.06236	0.669167	3.08197	0.00205633	0.07975
hsa-miR-93-5p	2128.31	-0.553061	0.1812	-3.05221	0.00227164	0.0844291
hsa-miR-3960	69.0103	1.75258	0.578201	3.03108	0.00243678	0.0869443
hsa-miR-1909-3p	816.351	1.74204	0.586576	2.96984	0.00297952	0.0984346
hsa-miR-4665-3p	460.245	2.00471	0.672575	2.98065	0.0028764	0.0984346
hsa-miR-619-5p	182.087	1.59382	0.539729	2.95299	0.00314712	0.100258
hsa-miR-5582-3p	9.18725	2.18815	0.759234	2.88204	0.00395105	0.109703
hsa-miR-4420	13.1361	-2.10983	0.73001	-2.89014	0.00385074	0.109703
hsa-miR-4463	9.96642	1.41488	0.487979	2.89947	0.0037379	0.109703
hsa-miR-5193	37.8062	0.910179	0.316741	2.87358	0.00405854	0.109703
hsa-miR-378a-3p	719.219	-1.09843	0.378845	-2.89941	0.00373864	0.109703
hsa-miR-6724-5p	7635.45	1.82072	0.640276	2.84365	0.00446004	0.117011
hsa-miR-4707-5p	290.646	1.28635	0.45823	2.80722	0.00499716	0.12717
hsa-miR-1972	49.8987	1.31093	0.468422	2.7986	0.00513244	0.12717
hsa-miR-34a-5p	3852.89	-0.772797	0.278349	-2.77635	0.00549723	0.12904
hsa-miR-3178	529.817	1.64748	0.593108	2.77771	0.0054744	0.12904
hsa-miR-1287-5p	45.979	-0.773732	0.279751	-2.76579	0.00567859	0.129879
hsa-miR-4764-5p	25.5808	1.29189	0.470794	2.74406	0.00606837	0.135325
hsa-miR-7106-5p	191.661	1.81041	0.664677	2.72375	0.00645463	0.140427
hsa-miR-324-3p	111.272	-0.673453	0.249459	-2.69966	0.00694112	0.143988
hsa-miR-4281	34.9474	1.58005	0.584937	2.70123	0.00690844	0.143988
hsa-miR-1914-5p	22.3802	1.87471	0.698037	2.68569	0.007238	0.146734
hsa-miR-510-3p	19.2134	-1.46307	0.547105	-2.6742	0.0074908	0.148484
hsa-miR-1298-3p	9.85409	1.31308	0.498261	2.63532	0.00840586	0.163001
hsa-miR-5585-3p	57.3005	1.19815	0.459011	2.6103	0.0090463	0.171687
hsa-miR-1908-3p	76.0014	1.2574	0.485027	2.59243	0.00952997	0.177099
hsa-miR-3195	1980.44	1.6423	0.6378	2.57495	0.0100255	0.178854
hsa-miR-4646-3p	41.874	1.38337	0.53623	2.5798	0.00988575	0.178854
hsa-miR-193a-5p	3084.54	-0.710007	0.276703	-2.56595	0.0102893	0.179961
hsa-miR-6729-5p	11.4968	1.63904	0.647103	2.53289	0.0113128	0.190838
hsa-miR-6890-3p	12.0343	1.68624	0.66595	2.53207	0.011339	0.190838
hsa-miR-4665-5p	439.772	1.50969	0.600597	2.51365	0.0119489	0.19379
hsa-miR-4787-3p	72.0424	1.32889	0.527426	2.51958	0.0117494	0.19379
hsa-miR-146b-3p	341.96	-1.31719	0.528763	-2.49108	0.0127356	0.202225
hsa-miR-107	47.9994	-0.716434	0.288199	-2.4859	0.0129225	0.202225
hsa-miR-1292-3p	5286.07	1.7313	0.699758	2.47413	0.0133559	0.205405
hsa-miR-6775-5p	35.3907	1.48188	0.601073	2.4654	0.0136862	0.206916
hsa-miR-6089	85.8066	1.44785	0.588835	2.45885	0.0139384	0.207217
hsa-miR-3175	17.4957	1.25008	0.513377	2.43501	0.0148914	0.210844
hsa-miR-6807-5p	295.209	-1.1801	0.482626	-2.44516	0.0144789	0.210844
hsa-miR-4516	91.4506	1.28303	0.526229	2.43816	0.0147623	0.210844
hsa-miR-4669	21.4354	1.1507	0.476384	2.41548	0.0157145	0.219022
hsa-miR-4485-3p	368.897	1.51607	0.631623	2.40027	0.0163831	0.222251
hsa-miR-6723-5p	238.806	0.975402	0.407541	2.39338	0.0166937	0.222251
hsa-miR-6082	4030.3	-1.70367	0.710853	-2.39666	0.0165452	0.222251
hsa-miR-4790-5p	48.4114	1.04463	0.440698	2.3704	0.0177688	0.223236
hsa-miR-4497	1536.09	1.53245	0.645301	2.37478	0.0175593	0.223236
hsa-miR-5095	28.5959	1.12206	0.472443	2.37502	0.0175481	0.223236
hsa-miR-3196	74.5057	1.64279	0.690301	2.37982	0.0173209	0.223236
hsa-miR-4449	71.562	1.31684	0.561576	2.34491	0.0190319	0.229552
hsa-miR-4512	86.7979	1.47982	0.630063	2.34868	0.0188401	0.229552
hsa-miR-2277-3p	34.4354	1.41918	0.605279	2.34468	0.0190435	0.229552
hsa-miR-4484	693.787	1.13307	0.486604	2.32854	0.0198836	0.236482
hsa-miR-4532	12616.6	1.60775	0.692805	2.32064	0.0203062	0.238331
hsa-miR-3614-5p	60.7525	1.48789	0.650769	2.28636	0.0222332	0.254257
hsa-miR-1273h-5p	11.7408	1.17278	0.512199	2.28969	0.0220391	0.254257
hsa-miR-1237-5p	36.4278	1.27713	0.560406	2.27894	0.0226708	0.255979
hsa-miR-299-5p	83.6093	-0.834831	0.370052	-2.25598	0.0240719	0.268402
hsa-miR-1915-3p	27.8441	1.4141	0.639198	2.21231	0.0269456	0.273754
hsa-miR-3155b	12.8348	1.00442	0.453065	2.21695	0.0266265	0.273754
hsa-miR-3181	12.7943	1.32967	0.602935	2.20533	0.027431	0.273754
hsa-miR-6816-5p	183.322	1.34693	0.610658	2.2057	0.027405	0.273754
hsa-miR-6735-5p	9.15077	1.30909	0.594332	2.20263	0.0276209	0.273754
hsa-miR-125a-3p	177.656	-0.423361	0.189588	-2.23306	0.025545	0.273754
hsa-miR-4726-5p	46.2035	1.57658	0.711608	2.21552	0.0267245	0.273754
hsa-miR-6763-3p	163.737	1.25494	0.566894	2.21371	0.0268489	0.273754
hsa-miR-4707-3p	5921.18	1.45129	0.651025	2.22925	0.0257975	0.273754
hsa-miR-152-5p	242.189	-0.637987	0.28588	-2.23166	0.0256373	0.273754
hsa-miR-490-3p	9.5231	1.52651	0.699633	2.18188	0.0291187	0.279289
hsa-miR-5787	520.052	1.39204	0.637378	2.18401	0.0289612	0.279289
hsa-miR-4634	3661.31	1.36268	0.624496	2.18205	0.0291062	0.279289
hsa-miR-146b-5p	15983.6	-1.36285	0.630714	-2.16081	0.0307103	0.284126
hsa-let-7a-5p	448426	-0.558587	0.258797	-2.1584	0.0308971	0.284126
hsa-miR-1469	1091.32	1.48837	0.686317	2.16864	0.03011	0.284126
hsa-miR-4445-3p	54.4428	0.980171	0.452837	2.16451	0.0304252	0.284126
hsa-miR-744-3p	21.4558	-0.702129	0.326148	-2.15279	0.0313351	0.285213
hsa-miR-4479	86.0129	1.04468	0.489413	2.13456	0.0327968	0.285282
hsa-miR-663a	43.9498	1.27492	0.594715	2.14376	0.0320524	0.285282
hsa-miR-503-3p	31.8114	0.892865	0.418637	2.13279	0.0329418	0.285282
hsa-miR-4762-3p	26.3222	-1.0529	0.49333	-2.13426	0.0328212	0.285282
hsa-miR-4466	53.3721	1.11376	0.521123	2.13723	0.032579	0.285282
hsa-miR-183-5p	18.339	1.05452	0.497698	2.11879	0.034108	0.29163
hsa-miR-4472	8.5467	1.07032	0.505778	2.11619	0.0343286	0.29163
hsa-miR-574-5p	1743.33	-0.454137	0.21588	-2.10366	0.0354085	0.297966
hsa-miR-1468-5p	102.591	-0.776009	0.36956	-2.09982	0.0357446	0.297983
hsa-let-7e-3p	158.615	-0.614447	0.294643	-2.08539	0.0370337	0.305701
hsa-miR-6886-5p	41.3757	-1.25619	0.6034	-2.08185	0.0373559	0.305701
hsa-miR-1266-3p	82.0457	-1.02623	0.49562	-2.0706	0.0383963	0.308947
hsa-miR-132-3p	957.536	-0.580042	0.280203	-2.07008	0.0384452	0.308947
hsa-miR-4788	35.0151	0.689424	0.335038	2.05775	0.0396142	0.315498
hsa-miR-4787-5p	24.6278	1.28821	0.63047	2.04326	0.0410268	0.323857
hsa-miR-30c-5p	9278.2	-0.673086	0.330054	-2.03932	0.041418	0.324078
hsa-miR-140-5p	173.579	-0.752274	0.370618	-2.02978	0.0423789	0.324313
hsa-miR-103b	5772.1	-0.64319	0.316337	-2.03324	0.0420278	0.324313
hsa-miR-103a-3p	5760.74	-0.643762	0.317961	-2.02466	0.0429024	0.324313
hsa-miR-95-3p	14.1191	1.11294	0.549668	2.02476	0.0428923	0.324313
hsa-miR-3157-5p	8.43913	0.994884	0.492851	2.01863	0.0435255	0.326259
hsa-miR-521	8.34916	1.13583	0.564234	2.01304	0.04411	0.327885
hsa-miR-1248	9.68404	1.30304	0.652199	1.99791	0.0457259	0.337087
hsa-miR-6727-3p	76.2101	-0.810065	0.411197	-1.97002	0.0488362	0.337689
hsa-miR-2277-5p	38.4062	-0.623183	0.312675	-1.99307	0.0462539	0.337689
hsa-miR-3621	66.8866	1.28235	0.650134	1.97243	0.0485601	0.337689
hsa-miR-192-5p	1050.29	-0.654598	0.330634	-1.97983	0.0477227	0.337689
hsa-miR-6781-5p	9.54115	1.02775	0.516526	1.98974	0.0466199	0.337689
hsa-miR-629-5p	89.9211	-0.542342	0.273255	-1.98474	0.0471729	0.337689
hsa-miR-6862-3p	32.0171	-1.53726	0.777755	-1.97653	0.0480944	0.337689
hsa-miR-4760-3p	314.234	-0.573183	0.289865	-1.97742	0.0479947	0.337689
hsa-miR-193b-3p	3684.56	-0.482629	0.246418	-1.95858	0.0501624	0.338976
hsa-let-7b-5p	111436	-0.652465	0.333067	-1.95896	0.0501175	0.338976
hsa-miR-1180-3p	286.225	-0.549787	0.280229	-1.96192	0.0497714	0.338976
hsa-miR-4292	16.4763	1.1587	0.596883	1.94125	0.0522279	0.343961
hsa-miR-3908	83.7885	0.766842	0.39603	1.93632	0.0528281	0.343961
hsa-miR-148b-3p	6758.44	-0.410427	0.211555	-1.94004	0.0523743	0.343961
hsa-miR-27a-5p	113.771	-0.558674	0.288436	-1.93691	0.0527565	0.343961
hsa-miR-4778-5p	24.3681	0.943728	0.486694	1.93906	0.0524943	0.343961
hsa-miR-6785-3p	77.4731	1.03962	0.540321	1.92408	0.0543449	0.345046
hsa-miR-378g	24.684	1.38521	0.719062	1.92641	0.0540526	0.345046
hsa-miR-548an	17.4814	1.31195	0.680888	1.92682	0.0540026	0.345046
hsa-miR-30e-5p	9391.25	-0.580958	0.302188	-1.92251	0.0545421	0.345046
hsa-miR-7108-3p	11.2615	0.779616	0.408857	1.90682	0.0565443	0.348322
hsa-miR-5096	99.6714	1.04119	0.54456	1.91198	0.0558787	0.348322
hsa-miR-6798-3p	15.2751	-0.849918	0.445866	-1.90622	0.0566219	0.348322
hsa-miR-548a-3p	40.3036	-0.829689	0.433444	-1.91418	0.0555976	0.348322
hsa-miR-335-3p	1241.69	-0.715271	0.376098	-1.90182	0.0571949	0.349437
hsa-miR-30a-5p	40607.2	-0.748472	0.39824	-1.87945	0.0601836	0.365196
hsa-miR-219b-5p	151.958	1.12806	0.602718	1.87162	0.0612599	0.369215
hsa-miR-3607-3p	212.642	-0.864702	0.468004	-1.84764	0.0646544	0.384478
hsa-miR-4527	26.4122	0.636622	0.344426	1.84836	0.0645504	0.384478
hsa-miR-3655	27.1538	0.919299	0.499488	1.84048	0.0656975	0.385541
hsa-miR-1281	16.1981	1.04002	0.564339	1.8429	0.0653443	0.385541
hsa-miR-6512-3p	276.707	0.789183	0.43546	1.8123	0.0699405	0.40511
hsa-miR-634	9.17547	0.993912	0.548291	1.81274	0.0698713	0.40511
hsa-miR-4303	8.69055	1.32237	0.732875	1.80436	0.0711747	0.407554
hsa-miR-186-5p	17018.5	-0.463564	0.257005	-1.80371	0.0712762	0.407554
hsa-miR-642a-5p	18.7929	1.03171	0.57573	1.792	0.0731325	0.415504
hsa-miR-1246	1314.14	0.953074	0.533096	1.78781	0.0738069	0.416682
hsa-miR-548q	21.0879	0.614444	0.345698	1.7774	0.0755025	0.423574
hsa-miR-1273f	19.2	1.09161	0.616724	1.77002	0.0767243	0.427738
hsa-miR-4291	13.8406	0.748038	0.423929	1.76454	0.0776417	0.430164
hsa-miR-1973	38.7969	0.985419	0.561433	1.75518	0.0792279	0.436242
hsa-miR-3128	19.0794	1.10287	0.630578	1.74898	0.0802939	0.4394
hsa-miR-3919	17.5182	1.00726	0.58059	1.73488	0.0827618	0.443315
hsa-miR-6836-3p	157.568	1.02272	0.59095	1.73063	0.0835175	0.443315
hsa-miR-3910	11.8546	0.926305	0.532472	1.73963	0.0819237	0.443315
hsa-miR-2681-3p	8.43955	-0.667837	0.387431	-1.72376	0.0847512	0.443315
hsa-miR-3679-3p	8.10056	-0.889189	0.515394	-1.72526	0.0844807	0.443315
hsa-miR-3925-5p	11.9358	0.809165	0.469771	1.72247	0.0849852	0.443315
hsa-miR-6720-3p	117.737	1.09058	0.631587	1.72673	0.0842164	0.443315
hsa-miR-589-5p	546.798	-0.35378	0.204274	-1.73189	0.0832923	0.443315
hsa-miR-524-3p	13.1715	-0.795406	0.471627	-1.68652	0.0916965	0.446512
hsa-miR-7151-3p	13.983	0.642597	0.375731	1.71026	0.0872185	0.446512
hsa-miR-194-5p	44.7295	-0.672466	0.396525	-1.6959	0.0899052	0.446512
hsa-miR-664b-3p	16.0932	1.03783	0.60853	1.70547	0.0881073	0.446512
hsa-miR-875-5p	20.8262	0.910038	0.538135	1.69109	0.0908188	0.446512
hsa-miR-425-5p	955.342	-0.374975	0.221762	-1.69088	0.0908589	0.446512
hsa-miR-4433a-5p	111.793	1.08974	0.645243	1.68888	0.0912421	0.446512
hsa-miR-6840-5p	903.824	0.821842	0.482101	1.70471	0.088249	0.446512
hsa-miR-20a-5p	513.925	-0.512458	0.304239	-1.68439	0.0921057	0.446512
hsa-miR-602	12.649	1.05383	0.615917	1.711	0.0870818	0.446512
hsa-miR-4510	15.0321	-0.705867	0.416489	-1.69481	0.0901124	0.446512
hsa-miR-33a-5p	8.19072	-0.968681	0.564419	-1.71624	0.0861172	0.446512
hsa-miR-7974	26.9125	0.764317	0.449442	1.70059	0.0890201	0.446512
hsa-miR-1273c	12.6832	0.828484	0.492722	1.68144	0.0926771	0.446854
hsa-miR-7848-3p	9.53312	0.980382	0.591114	1.65853	0.0972097	0.446964
hsa-miR-1273g-3p	867.63	1.04169	0.627942	1.65889	0.0971371	0.446964
hsa-miR-3151-5p	9.84586	0.834801	0.502277	1.66203	0.0965059	0.446964
hsa-miR-7157-5p	13.6824	-0.610202	0.367855	-1.65881	0.0971536	0.446964
hsa-miR-4459	30.394	0.93974	0.566583	1.65861	0.0971945	0.446964
hsa-miR-34b-5p	173.2	-0.541909	0.326267	-1.66094	0.0967259	0.446964
hsa-miR-5587-5p	92.0956	1.24246	0.745964	1.66557	0.0957986	0.446964
hsa-miR-6845-5p	8.67233	0.831169	0.497793	1.66971	0.0949769	0.446964
hsa-let-7d-3p	777.677	-0.499784	0.300772	-1.66167	0.0965789	0.446964
hsa-miR-4731-5p	13.6217	0.54189	0.331924	1.63257	0.102558	0.453646
hsa-miR-4749-5p	66.978	0.727533	0.44586	1.63175	0.102732	0.453646
hsa-let-7g-5p	29575.1	-0.44103	0.268339	-1.64356	0.100268	0.453646
hsa-miR-5588-3p	32.3615	0.93536	0.57134	1.63713	0.101603	0.453646
hsa-miR-1275	107.591	0.419748	0.255598	1.64222	0.100544	0.453646
hsa-miR-3909	212.619	-0.456983	0.279968	-1.63227	0.102623	0.453646
hsa-miR-128-3p	2060.3	-0.300713	0.183646	-1.63746	0.101535	0.453646
hsa-miR-4758-3p	16.426	0.912769	0.556247	1.64094	0.100809	0.453646
hsa-miR-499a-3p	10.0884	0.810008	0.499638	1.62119	0.104977	0.454557
hsa-miR-6790-3p	1976.94	1.08177	0.667611	1.62036	0.105155	0.454557
hsa-miR-6805-5p	664.593	0.92748	0.573773	1.61646	0.105995	0.454557
hsa-miR-769-5p	2601.57	-0.599384	0.369066	-1.62406	0.104363	0.454557
hsa-miR-361-3p	346.974	-0.39811	0.2462	-1.61702	0.105875	0.454557
hsa-miR-5701	1006.19	1.14319	0.706132	1.61895	0.105459	0.454557
hsa-miR-25-3p	9673.86	-0.466078	0.288984	-1.61282	0.106784	0.455749
hsa-miR-345-5p	1099.9	-0.381526	0.237727	-1.60489	0.108518	0.460944
hsa-miR-328-3p	554.123	-0.521938	0.325706	-1.60248	0.109049	0.461004
hsa-miR-384	9.1125	0.869027	0.544578	1.59578	0.110538	0.465093
hsa-miR-4251	11.1439	-0.825459	0.521839	-1.58183	0.113689	0.476106
hsa-miR-4718	9.3902	1.05257	0.667722	1.57636	0.114944	0.479111
hsa-miR-6769a-3p	26.5923	0.49908	0.318463	1.56715	0.117079	0.481263
hsa-miR-30c-2-3p	133.866	-0.670156	0.427513	-1.56757	0.116981	0.481263
hsa-miR-6501-3p	15.7606	0.992607	0.632243	1.56998	0.116421	0.481263
hsa-miR-106b-3p	100.768	-0.441533	0.283776	-1.55592	0.119727	0.489893
hsa-miR-4492	47.9608	0.832206	0.536296	1.55177	0.120718	0.491693
hsa-miR-548as-3p	15.2737	0.735625	0.475069	1.54846	0.121512	0.492677
hsa-miR-6785-5p	11.2907	0.862386	0.560313	1.53911	0.123776	0.495336
hsa-miR-4691-3p	52.7098	-0.614954	0.399612	-1.53888	0.123834	0.495336
hsa-miR-3168	669.389	0.338733	0.219504	1.54318	0.122787	0.495336
hsa-let-7c-5p	35159.3	-0.773832	0.504419	-1.5341	0.125004	0.495571
hsa-let-7d-5p	4588.72	-0.349625	0.227648	-1.53581	0.124585	0.495571
hsa-miR-125b-2-3p	840.322	-0.66068	0.432425	-1.52785	0.12655	0.499479
hsa-miR-493-5p	1222.01	-0.511694	0.336182	-1.52207	0.12799	0.50294
hsa-miR-3184-5p	3014.74	-0.372326	0.245006	-1.51966	0.128597	0.503107
hsa-miR-5585-5p	15.86	0.683376	0.450365	1.51738	0.12917	0.503142
hsa-miR-6895-5p	8.33203	0.873002	0.579173	1.50733	0.131727	0.510872
hsa-miR-497-5p	727.363	-0.624307	0.417436	-1.49558	0.134764	0.515702
hsa-miR-1260b	516.422	0.643103	0.4323	1.48763	0.136848	0.515702
hsa-miR-5683	11.3173	-0.849282	0.569786	-1.49053	0.136085	0.515702
hsa-miR-3622a-5p	426.209	0.759115	0.51276	1.48045	0.138754	0.515702
hsa-miR-5706	20.1675	0.685821	0.458557	1.4956	0.134757	0.515702
hsa-miR-4734	10.6294	-1.03492	0.693563	-1.49218	0.135652	0.515702
hsa-miR-6826-5p	12.0767	0.793329	0.535677	1.48099	0.13861	0.515702
hsa-miR-3194-5p	31.3725	0.912134	0.609492	1.49655	0.134511	0.515702
hsa-miR-505-3p	93.2042	-0.466693	0.314444	-1.48419	0.137759	0.515702
hsa-miR-30b-5p	2155.16	-0.470936	0.317562	-1.48297	0.138081	0.515702
hsa-miR-149-5p	408.9	-0.452638	0.306435	-1.47711	0.139646	0.516866
hsa-miR-412-5p	25.6876	-0.8985	0.615846	-1.45897	0.144574	0.532892
hsa-miR-195-3p	95.7341	-0.500834	0.343915	-1.45627	0.145318	0.53343
hsa-let-7e-5p	23320	-0.408987	0.281804	-1.45132	0.146691	0.536264
hsa-miR-4715-3p	8.6816	0.664974	0.461876	1.43973	0.149945	0.543341
hsa-miR-4520-3p	10.712	0.713813	0.49672	1.43705	0.150703	0.543341
hsa-miR-4488	1735.78	0.767123	0.533389	1.43821	0.150376	0.543341
hsa-miR-454-5p	47.1481	-0.461187	0.321209	-1.43579	0.151063	0.543341
hsa-miR-532-5p	1292.8	-0.565122	0.394805	-1.43139	0.152318	0.543469
hsa-miR-6838-3p	10.5569	0.849399	0.59308	1.43218	0.152091	0.543469
hsa-miR-3615	264.238	-0.468786	0.328647	-1.42641	0.153749	0.546392
hsa-miR-3140-5p	17.652	0.677527	0.477498	1.41891	0.155925	0.551751
hsa-miR-606	13.087	0.766919	0.541242	1.41696	0.156494	0.551751
hsa-miR-626	15.6341	0.650457	0.461077	1.41074	0.158323	0.555999
hsa-miR-455-5p	211.428	-0.43314	0.307651	-1.4079	0.159162	0.556754
hsa-miR-125a-5p	23435.6	-0.323844	0.231322	-1.39997	0.161523	0.562805
hsa-miR-423-3p	16985.7	-0.410396	0.293719	-1.39724	0.162341	0.563456
hsa-miR-1180-5p	166.597	1.00434	0.723068	1.389	0.164834	0.569892
hsa-miR-6500-3p	13.4472	-0.527015	0.380894	-1.38363	0.166473	0.573335
hsa-miR-4691-5p	8.8861	0.897838	0.652234	1.37656	0.168649	0.578596
hsa-miR-3654	8.02741	0.788951	0.58338	1.35238	0.176254	0.581276
hsa-miR-130a-3p	2735.76	-0.411742	0.300598	-1.36974	0.170767	0.581276
hsa-miR-363-3p	14.585	1.00023	0.737883	1.35553	0.175247	0.581276
hsa-miR-302a-5p	26.5881	1.05874	0.777209	1.36223	0.173125	0.581276
hsa-miR-99a-3p	194.832	-0.568323	0.421841	-1.34724	0.177902	0.581276
hsa-miR-625-5p	389.661	-0.342294	0.253857	-1.34837	0.177539	0.581276
hsa-miR-152-3p	5846.69	-0.418445	0.310199	-1.34895	0.177352	0.581276
hsa-miR-4315	13.0775	-0.880347	0.645092	-1.36468	0.172353	0.581276
hsa-miR-4781-5p	14.2686	0.537333	0.392354	1.36951	0.17084	0.581276
hsa-miR-6798-5p	35.053	-0.565936	0.416844	-1.35767	0.174569	0.581276
hsa-miR-1296-5p	412.307	-0.35648	0.264253	-1.34901	0.177333	0.581276
hsa-miR-3144-5p	10.0125	0.704377	0.519424	1.35607	0.175076	0.581276
hsa-miR-671-3p	1044.21	-0.324487	0.238433	-1.36092	0.17354	0.581276
hsa-miR-585-3p	113.889	-0.570745	0.425032	-1.34283	0.179327	0.581673
hsa-miR-210-5p	115.506	0.667932	0.496784	1.34451	0.178783	0.581673
hsa-miR-4693-3p	118.146	0.518595	0.387594	1.33798	0.180901	0.582542
hsa-miR-5007-3p	38.3503	-0.816672	0.609588	-1.33971	0.18034	0.582542
hsa-miR-151a-3p	31673.7	-0.420976	0.315563	-1.33405	0.182188	0.584574
hsa-miR-3942-3p	25.8627	0.497911	0.375054	1.32757	0.18432	0.587948
hsa-miR-92a-3p	104429	-0.390738	0.294485	-1.32685	0.184558	0.587948
hsa-miR-6871-3p	8.31458	0.599666	0.455222	1.3173	0.187737	0.595947
hsa-miR-4785	16.3824	0.544587	0.414772	1.31298	0.18919	0.598431
hsa-miR-628-3p	30.0815	0.401137	0.307241	1.30561	0.191686	0.599943
hsa-miR-7113-3p	8.76749	0.916773	0.701623	1.30665	0.191333	0.599943
hsa-miR-1471	8.42732	0.658813	0.504539	1.30577	0.19163	0.599943
hsa-miR-331-3p	474.171	-0.527037	0.406959	-1.29506	0.195299	0.609115
hsa-miR-6835-5p	144.611	-0.463846	0.359822	-1.2891	0.197364	0.613411
hsa-miR-4792	20.7487	0.630182	0.4911	1.2832	0.199421	0.617651
hsa-miR-4738-5p	8.83163	0.658535	0.515854	1.27659	0.201746	0.622137
hsa-miR-5189-5p	21.143	0.838965	0.657947	1.27513	0.202264	0.622137
hsa-miR-140-3p	1534.35	-0.388321	0.306451	-1.26716	0.2051	0.628691
hsa-miR-34c-5p	4063.61	-0.439302	0.349845	-1.25571	0.209223	0.636951
hsa-miR-548h-5p	55.1624	-0.475438	0.378047	-1.25761	0.208531	0.636951
hsa-miR-1257	23.7468	0.917851	0.736872	1.24561	0.212909	0.637246
hsa-miR-585-5p	23.0916	-0.490667	0.396349	-1.23797	0.215728	0.637246
hsa-miR-503-5p	44.5558	0.625021	0.500764	1.24813	0.211982	0.637246
hsa-miR-887-3p	204.855	-0.369082	0.298149	-1.23791	0.215749	0.637246
hsa-miR-17-5p	504.325	-0.352328	0.281929	-1.2497	0.211408	0.637246
hsa-miR-4430	29.8954	0.507246	0.406019	1.24932	0.211549	0.637246
hsa-miR-708-3p	104.205	-0.483315	0.389843	-1.23977	0.215061	0.637246
hsa-miR-30b-3p	29.7339	-0.405149	0.326603	-1.24049	0.214793	0.637246
hsa-miR-193b-5p	57.3288	-0.396723	0.31873	-1.2447	0.213242	0.637246
hsa-miR-6742-5p	45.3269	0.594776	0.485309	1.22556	0.220364	0.646593
hsa-miR-548k	137.415	-0.309241	0.252133	-1.2265	0.220011	0.646593
hsa-miR-1247-3p	14.0809	0.632166	0.519843	1.21607	0.223958	0.651406
hsa-miR-4730	85.5298	0.930382	0.765463	1.21545	0.224195	0.651406
hsa-miR-15a-5p	550.445	-0.412113	0.338357	-1.21798	0.22323	0.651406
hsa-miR-30e-3p	926.496	-0.381331	0.31449	-1.21254	0.225307	0.652511
hsa-miR-4709-5p	10.4116	0.54559	0.451994	1.20707	0.227403	0.656452
hsa-miR-30d-3p	146.171	-0.369066	0.30629	-1.20496	0.22822	0.656684
hsa-miR-1184	12.7111	0.625208	0.520533	1.20109	0.229715	0.658862
hsa-miR-6736-3p	15.7075	0.621472	0.519912	1.19534	0.231954	0.658927
hsa-miR-4677-3p	90.3067	-0.368362	0.30816	-1.19536	0.231946	0.658927
hsa-miR-6733-3p	149.461	0.42631	0.35659	1.19552	0.231884	0.658927
hsa-miR-6844	78.5428	-0.421464	0.355124	-1.18681	0.235303	0.664696
hsa-miR-431-5p	93.9486	0.507215	0.429578	1.18073	0.237711	0.664696
hsa-miR-191-5p	94420.5	-0.350062	0.296322	-1.18136	0.237462	0.664696
hsa-miR-302b-3p	50.2236	0.916131	0.774819	1.18238	0.237054	0.664696
hsa-miR-143-5p	157.382	-0.393942	0.332313	-1.18545	0.235838	0.664696
hsa-miR-148b-5p	256.65	-0.311693	0.265157	-1.1755	0.239794	0.666342
hsa-miR-342-5p	24.9982	-0.373385	0.317255	-1.17692	0.239226	0.666342
hsa-miR-3914	11.7599	0.482461	0.41116	1.17341	0.24063	0.666589
hsa-miR-589-3p	22.0128	-0.443796	0.380358	-1.16679	0.243297	0.669817
hsa-miR-323a-5p	10.3523	0.473868	0.406084	1.16692	0.243242	0.669817
hsa-miR-548av-5p	137.648	-0.296281	0.255259	-1.16071	0.245761	0.674519
hsa-miR-30a-3p	1149.17	-0.481518	0.418022	-1.1519	0.249363	0.680231
hsa-miR-4434	9.69751	0.435827	0.380353	1.14585	0.251857	0.680231
hsa-miR-296-5p	278.84	0.58663	0.511777	1.14626	0.251687	0.680231
hsa-miR-196b-5p	1741.75	-0.364751	0.3187	-1.1445	0.252418	0.680231
hsa-miR-181c-3p	78.777	-0.385586	0.334988	-1.15104	0.249714	0.680231
hsa-miR-4786-5p	8.05542	0.723259	0.630246	1.14758	0.251141	0.680231
hsa-miR-6895-3p	10.6192	-0.669427	0.590631	-1.13341	0.257043	0.690609
hsa-miR-3117-3p	67.7495	-0.466735	0.413216	-1.12952	0.258679	0.690845
hsa-miR-6781-3p	8.69484	0.512541	0.453099	1.13119	0.257975	0.690845
hsa-miR-1197	27.1384	-0.50098	0.444353	-1.12744	0.259557	0.691119
hsa-miR-548ad-5p	35.537	0.51974	0.462538	1.12367	0.261153	0.691242
hsa-miR-3656	56.3008	0.468392	0.416587	1.12436	0.260862	0.691242
hsa-miR-6500-5p	69.0011	0.351214	0.314088	1.1182	0.26348	0.691612
hsa-miR-500a-3p	959.351	-0.314998	0.281782	-1.11788	0.263619	0.691612
hsa-miR-190a-3p	48.4887	0.735915	0.657566	1.11915	0.263076	0.691612
hsa-miR-6499-5p	9.02523	0.476814	0.428536	1.11266	0.265855	0.69372
hsa-miR-181d-3p	198.838	0.860588	0.773651	1.11237	0.265978	0.69372
hsa-miR-302d-3p	71.2132	0.857421	0.772419	1.11005	0.266979	0.693727
hsa-miR-4443	82.5181	0.281955	0.255127	1.10516	0.269091	0.693727
hsa-miR-23a-3p	8546.17	-0.219892	0.198707	-1.10662	0.268459	0.693727
hsa-miR-6720-5p	160.895	0.47085	0.424908	1.10812	0.267809	0.693727
hsa-miR-6126	19.795	0.547746	0.499267	1.0971	0.272597	0.700739
hsa-miR-323a-3p	211.173	-0.382715	0.350121	-1.09309	0.274353	0.701211
hsa-miR-4257	13.0297	-0.554337	0.50663	-1.09417	0.273882	0.701211
hsa-miR-576-5p	115.412	-0.30404	0.278845	-1.09036	0.275555	0.702272
hsa-miR-4661-5p	10.7522	-0.497977	0.458272	-1.08664	0.277196	0.702439
hsa-miR-409-3p	10051.6	-0.356876	0.328326	-1.08696	0.277056	0.702439
hsa-miR-3139	10.4694	0.570345	0.526191	1.08391	0.278403	0.703499
hsa-miR-6715b-5p	22.7909	0.449463	0.415435	1.08191	0.279292	0.703752
hsa-miR-3924	12.0665	0.696514	0.650696	1.07041	0.284433	0.712681
hsa-miR-33b-5p	24.8052	-0.477248	0.445184	-1.07202	0.283709	0.712681
hsa-miR-3622b-5p	11.636	0.44321	0.4153	1.0672	0.28588	0.7143
hsa-miR-627-3p	14.7181	-0.422039	0.39792	-1.06061	0.288866	0.717302
hsa-miR-5191	28.9271	0.508711	0.479604	1.06069	0.288831	0.717302
hsa-miR-1237-3p	19.909	0.547521	0.516903	1.05923	0.289494	0.717302
hsa-miR-376a-5p	53.0752	-0.60433	0.576106	-1.04899	0.294182	0.7269
hsa-miR-485-5p	268.548	-0.338748	0.324523	-1.04383	0.296562	0.73018
hsa-miR-549a	624.922	-0.549534	0.527095	-1.04257	0.297147	0.73018
hsa-miR-1273e	41.6456	0.567628	0.546142	1.03934	0.298647	0.731849
hsa-miR-7155-3p	8.64479	0.46555	0.450883	1.03253	0.301824	0.736026
hsa-miR-4433a-3p	8.32867	0.592914	0.574445	1.03215	0.302002	0.736026
hsa-miR-660-5p	430.948	-0.444304	0.434942	-1.02153	0.307006	0.746183
hsa-miR-92b-5p	39.0314	-0.271423	0.26676	-1.01748	0.308926	0.746958
hsa-miR-6806-5p	8.98638	-0.41103	0.404031	-1.01732	0.308999	0.746958
hsa-miR-6827-3p	24.3046	-0.435818	0.431066	-1.01102	0.312005	0.752186
hsa-miR-6786-3p	9.38916	0.441897	0.440285	1.00366	0.315541	0.754067
hsa-miR-4288	24.9004	-0.469278	0.467985	-1.00276	0.315976	0.754067
hsa-miR-1206	316.694	0.722811	0.722352	1.00064	0.317003	0.754067
hsa-miR-499b-3p	892.104	-0.42221	0.422848	-0.99849	0.318042	0.754067
hsa-miR-935	20.0666	0.588565	0.589887	0.997758	0.318397	0.754067
hsa-miR-6868-5p	25.6131	0.410197	0.410929	0.998219	0.318173	0.754067
hsa-miR-195-5p	823.499	-0.402406	0.403566	-0.997126	0.318703	0.754067
hsa-miR-2682-5p	68.3178	-0.358971	0.363556	-0.987388	0.323452	0.759262
hsa-miR-4262	127.907	0.364729	0.368589	0.989528	0.322405	0.759262
hsa-miR-330-5p	79.0991	-0.344233	0.348185	-0.988649	0.322835	0.759262
hsa-miR-127-5p	101.685	-0.376781	0.385374	-0.977701	0.328222	0.759747
hsa-miR-4435	23.7224	-0.396677	0.403979	-0.981924	0.326137	0.759747
hsa-let-7b-3p	9.97373	0.47773	0.492692	0.969632	0.33223	0.759747
hsa-miR-4697-3p	8.16934	-0.607152	0.625026	-0.971402	0.331348	0.759747
hsa-miR-143-3p	231190	-0.456542	0.465877	-0.979964	0.327104	0.759747
hsa-miR-330-3p	29.2569	-0.341817	0.3527	-0.969145	0.332473	0.759747
hsa-miR-5685	14.0047	-0.587178	0.604713	-0.971003	0.331547	0.759747
hsa-miR-15b-3p	57.8914	-0.361791	0.37108	-0.974968	0.329576	0.759747
hsa-miR-214-3p	4155.57	-0.329662	0.339728	-0.97037	0.331862	0.759747
hsa-miR-6891-5p	174.042	0.75197	0.776802	0.968033	0.333028	0.759747
hsa-miR-221-3p	34338.2	-0.246389	0.251826	-0.97841	0.327871	0.759747
hsa-miR-199b-5p	41883	-0.42243	0.440329	-0.959351	0.337382	0.762343
hsa-miR-539-3p	124.941	-0.379935	0.397212	-0.956505	0.338817	0.762343
hsa-miR-34b-3p	39.8108	-0.33536	0.352539	-0.951271	0.341467	0.762343
hsa-miR-5699-5p	43.0058	0.281513	0.292872	0.961214	0.336444	0.762343
hsa-miR-27b-5p	648.297	-0.362868	0.382442	-0.948819	0.342713	0.762343
hsa-miR-7114-3p	9.70237	-0.437972	0.461585	-0.948845	0.3427	0.762343
hsa-miR-4508	67.3368	0.364939	0.382982	0.952888	0.340647	0.762343
hsa-miR-379-5p	253.721	-0.311204	0.326681	-0.952622	0.340782	0.762343
hsa-miR-324-5p	49.3391	-0.333183	0.349991	-0.951975	0.34111	0.762343
hsa-miR-28-3p	28476	-0.333833	0.348113	-0.958979	0.337569	0.762343
hsa-miR-132-5p	107.035	-0.387974	0.410109	-0.946028	0.344134	0.763602
hsa-miR-3605-3p	120.589	-0.36018	0.382381	-0.941941	0.346223	0.764432
hsa-miR-6866-5p	13.851	0.428172	0.454548	0.941973	0.346206	0.764432
hsa-miR-625-3p	306.939	-0.248363	0.265799	-0.934401	0.350097	0.765156
hsa-miR-98-5p	9344.91	-0.252955	0.269784	-0.937622	0.348438	0.765156
hsa-miR-6824-3p	46.7518	-0.312558	0.33288	-0.938951	0.347756	0.765156
hsa-miR-26b-5p	22167.1	-0.346039	0.370904	-0.932962	0.35084	0.765156
hsa-miR-92b-3p	42236.4	-0.283813	0.30404	-0.933475	0.350575	0.765156
hsa-miR-1199-5p	11.4015	0.595315	0.645241	0.922624	0.356203	0.771362
hsa-miR-214-5p	915.223	-0.277784	0.30307	-0.916566	0.35937	0.771362
hsa-miR-4531	44.6263	-0.486959	0.531559	-0.916095	0.359617	0.771362
hsa-miR-501-5p	14.6754	-0.460717	0.503041	-0.915864	0.359738	0.771362
hsa-miR-4662a-5p	21.2149	-0.466372	0.505914	-0.92184	0.356612	0.771362
hsa-miR-4271	95.1443	0.33585	0.366517	0.916326	0.359496	0.771362
hsa-miR-3163	11.0168	0.528205	0.57327	0.921388	0.356848	0.771362
hsa-miR-1285-5p	23.0758	0.419303	0.461605	0.908359	0.363688	0.772039
hsa-miR-3156-5p	20.9525	0.480957	0.53147	0.904956	0.365489	0.772039
hsa-miR-18a-5p	27.629	-0.375468	0.419972	-0.89403	0.371306	0.772039
hsa-miR-3120-3p	1091.66	-0.271809	0.299477	-0.907612	0.364083	0.772039
hsa-miR-874-3p	103.841	-0.328999	0.364867	-0.901696	0.367219	0.772039
hsa-miR-5094	100.922	0.311116	0.34067	0.913249	0.361112	0.772039
hsa-miR-27b-3p	122323	-0.306735	0.34219	-0.896387	0.370046	0.772039
hsa-miR-381-3p	5159.9	-0.313892	0.350728	-0.894971	0.370803	0.772039
hsa-miR-361-5p	1308.2	-0.253469	0.280101	-0.904922	0.365507	0.772039
hsa-miR-6722-3p	1696.81	-0.533994	0.591156	-0.903306	0.366364	0.772039
hsa-miR-6809-5p	31.5381	0.303614	0.334716	0.907078	0.364366	0.772039
hsa-miR-100-3p	335.548	0.20991	0.234657	0.89454	0.371033	0.772039
hsa-miR-365a-5p	23.5443	-0.251305	0.280022	-0.897447	0.36948	0.772039
hsa-miR-3913-5p	12.4045	-0.383938	0.434268	-0.884104	0.37664	0.776134
hsa-miR-627-5p	12.0408	0.422588	0.477033	0.885867	0.375689	0.776134
hsa-miR-3158-5p	81.7454	-0.280544	0.317715	-0.883005	0.377234	0.776134
hsa-miR-454-3p	501.742	-0.255041	0.287302	-0.887709	0.374697	0.776134
hsa-miR-550a-3p	19.7121	-0.330742	0.374872	-0.882279	0.377626	0.776134
hsa-miR-572	12.2556	0.487414	0.556972	0.875113	0.381512	0.776151
hsa-miR-23b-3p	5557.07	-0.297048	0.342154	-0.86817	0.385301	0.776151
hsa-miR-4746-5p	18.7103	-0.304764	0.355048	-0.858374	0.390686	0.776151
hsa-miR-4267	13.8998	-0.346695	0.403876	-0.85842	0.390661	0.776151
hsa-miR-34a-3p	27.0104	-0.290727	0.336267	-0.864572	0.387274	0.776151
hsa-miR-802	69.8044	0.358662	0.417685	0.858692	0.390511	0.776151
hsa-miR-320d	17.1429	-0.310663	0.35438	-0.876637	0.380684	0.776151
hsa-miR-6846-5p	9.87766	0.515239	0.589125	0.874583	0.381801	0.776151
hsa-miR-24-3p	2326.93	-0.234993	0.271572	-0.865305	0.386871	0.776151
hsa-miR-224-5p	4135.43	-0.275824	0.317721	-0.868133	0.385321	0.776151
hsa-miR-4326	143.026	-0.278518	0.322773	-0.862893	0.388196	0.776151
hsa-miR-374b-3p	29.0159	-0.291848	0.336492	-0.867326	0.385764	0.776151
hsa-miR-3661	24.9296	-0.329213	0.374507	-0.879058	0.37937	0.776151
hsa-miR-3922-5p	19.0674	0.514488	0.592119	0.868893	0.384905	0.776151
hsa-miR-605-3p	9.99423	0.571037	0.662	0.862593	0.388361	0.776151
hsa-miR-3177-3p	11.1772	-0.30664	0.358778	-0.854679	0.392729	0.778476
hsa-miR-486-3p	3549.49	0.352548	0.415891	0.847693	0.396609	0.782688
hsa-miR-30c-1-3p	87.5204	-0.20421	0.240472	-0.849204	0.395768	0.782688
hsa-miR-495-3p	136.555	-0.335713	0.398457	-0.842531	0.399491	0.786635
hsa-miR-129-2-3p	60.1995	-0.425198	0.509539	-0.834477	0.404012	0.790304
hsa-miR-29b-3p	598.327	0.518427	0.619516	0.836825	0.402691	0.790304
hsa-miR-126-3p	28.6404	-0.335742	0.402299	-0.834557	0.403967	0.790304
hsa-miR-550b-2-5p	23.7563	-0.282913	0.340825	-0.830084	0.406491	0.793414
hsa-miR-134-5p	1349.73	-0.299807	0.36272	-0.82655	0.408492	0.795579
hsa-miR-421	271.363	0.281215	0.341493	0.823486	0.410232	0.795926
hsa-miR-181c-5p	803.024	-0.349569	0.424702	-0.823093	0.410455	0.795926
hsa-miR-6863	10880	0.575699	0.724131	0.795021	0.426601	0.79938
hsa-miR-15b-5p	975.374	-0.308872	0.38203	-0.808503	0.418801	0.79938
hsa-miR-433-5p	10.4338	0.282591	0.355227	0.795522	0.42631	0.79938
hsa-miR-190a-5p	482.969	-0.331999	0.418895	-0.792559	0.428035	0.79938
hsa-miR-219b-3p	10.7839	-0.461154	0.576271	-0.800237	0.423574	0.79938
hsa-miR-3610	9.2372	-0.458637	0.569324	-0.805582	0.420484	0.79938
hsa-miR-6819-5p	13.7452	-0.419107	0.529615	-0.791343	0.428744	0.79938
hsa-miR-339-3p	97.9749	-0.312131	0.388122	-0.804208	0.421277	0.79938
hsa-miR-93-3p	68.3749	-0.247511	0.309367	-0.800057	0.423678	0.79938
hsa-miR-320a	6832.24	-0.341634	0.417743	-0.81781	0.413466	0.79938
hsa-miR-16-5p	37152.7	-0.242462	0.307214	-0.789228	0.429979	0.79938
hsa-miR-200b-3p	30.7406	-0.374392	0.464508	-0.805997	0.420245	0.79938
hsa-miR-4775	113.958	-0.272957	0.334596	-0.815782	0.414625	0.79938
hsa-miR-486-5p	2684.9	0.340734	0.422112	0.807212	0.419544	0.79938
hsa-miR-6894-3p	9.6826	0.360636	0.452732	0.796576	0.425697	0.79938
hsa-miR-6722-5p	338.821	-0.404462	0.512093	-0.789823	0.429631	0.79938
hsa-miR-4323	16.3558	-0.303568	0.374254	-0.811128	0.417292	0.79938
hsa-miR-7704	4940.36	0.234603	0.292232	0.802799	0.422091	0.79938
hsa-miR-3972	19.2981	0.441748	0.544583	0.811167	0.41727	0.79938
hsa-miR-3605-5p	32.6119	-0.243269	0.308357	-0.788919	0.430159	0.79938
hsa-miR-329-3p	90.11	-0.294736	0.374633	-0.786732	0.431439	0.80009
hsa-let-7f-5p	143636	-0.244106	0.311855	-0.782755	0.433771	0.802571
hsa-miR-4636	22.0194	-0.320439	0.410259	-0.781065	0.434764	0.802571
hsa-miR-204-5p	518.975	-0.458616	0.588077	-0.779856	0.435476	0.802571
hsa-miR-6803-3p	11.945	0.356252	0.459093	0.775991	0.437754	0.805107
hsa-miR-3189-3p	14.4754	-0.55598	0.720479	-0.77168	0.440304	0.80813
hsa-miR-3934-5p	28.0835	0.3332	0.439699	0.757792	0.448576	0.813271
hsa-miR-154-5p	84.2656	-0.263311	0.345477	-0.762167	0.445961	0.813271
hsa-miR-628-5p	61.1657	0.308016	0.404988	0.760556	0.446922	0.813271
hsa-miR-4757-3p	9.17889	-0.436461	0.570571	-0.764956	0.444298	0.813271
hsa-miR-5579-3p	8.98429	-0.372599	0.490859	-0.759074	0.447808	0.813271
hsa-miR-1185-5p	55.869	-0.345488	0.454029	-0.760938	0.446694	0.813271
hsa-miR-6716-3p	26.702	-0.237236	0.314302	-0.7548	0.450369	0.814866
hsa-miR-500a-5p	17.0317	-0.315873	0.42175	-0.748957	0.453883	0.817906
hsa-miR-4704-3p	27.9867	0.538532	0.718486	0.749537	0.453534	0.817906
hsa-miR-382-3p	81.8008	-0.249528	0.3349	-0.745082	0.456222	0.818813
hsa-miR-301b-3p	136.169	-0.217912	0.292397	-0.745263	0.456113	0.818813
hsa-miR-758-3p	157.087	-0.286105	0.385699	-0.741781	0.45822	0.819349
hsa-miR-548av-3p	76.6193	-0.243415	0.328249	-0.741554	0.458358	0.819349
hsa-miR-99b-3p	213.352	-0.175415	0.237186	-0.739569	0.459562	0.819858
hsa-miR-365b-5p	64.5643	-0.18635	0.253624	-0.73475	0.462492	0.823438
hsa-miR-4649-3p	8.34404	-0.310212	0.428443	-0.724044	0.469039	0.825986
hsa-miR-3153	13.0242	0.331413	0.458733	0.722453	0.470016	0.825986
hsa-miR-369-5p	679.339	-0.225176	0.309758	-0.726943	0.467261	0.825986
hsa-miR-331-5p	11.9252	-0.294634	0.407368	-0.723261	0.46952	0.825986
hsa-miR-7152-3p	46.3299	-0.512449	0.701516	-0.730487	0.465093	0.825986
hsa-miR-10b-3p	35.3836	0.289074	0.398504	0.725397	0.468209	0.825986
hsa-miR-128-1-5p	29.7386	-0.252293	0.349726	-0.721401	0.470663	0.825986
hsa-miR-5000-3p	10.8614	-0.259347	0.360047	-0.720316	0.471331	0.825986
hsa-miR-1913	19.0474	0.360355	0.502868	0.7166	0.473621	0.826751
hsa-miR-4662b	22.7209	-0.361212	0.503281	-0.717714	0.472933	0.826751
hsa-miR-708-5p	440.739	-0.217577	0.305021	-0.713318	0.475649	0.82867
hsa-miR-3653-3p	103.571	-0.255386	0.35883	-0.711721	0.476638	0.828774
hsa-miR-181a-2-3p	2827.88	-0.364963	0.514549	-0.709287	0.478146	0.829779
hsa-miR-6747-3p	9.36421	0.30706	0.434723	0.706335	0.47998	0.831343
hsa-miR-1270	14.8402	-0.303766	0.432473	-0.702392	0.482435	0.833859
hsa-miR-1277-5p	23.5742	0.254061	0.362425	0.701002	0.483302	0.833859
hsa-miR-3529-3p	19.3797	0.270762	0.387982	0.697873	0.485257	0.834006
hsa-miR-433-3p	101.44	-0.212638	0.304637	-0.698007	0.485173	0.834006
hsa-miR-1908-5p	57.4404	0.293017	0.421208	0.695659	0.486642	0.834779
hsa-miR-299-3p	169.652	-0.26125	0.377323	-0.692377	0.488701	0.835098
hsa-miR-487a-5p	17.4296	-0.254392	0.36681	-0.693525	0.48798	0.835098
hsa-miR-4503	10.7393	0.337361	0.495481	0.680876	0.49595	0.838153
hsa-miR-22-5p	188.702	-0.267894	0.392581	-0.682393	0.494991	0.838153
hsa-miR-942-5p	21.5619	-0.253863	0.37225	-0.681969	0.495258	0.838153
hsa-miR-410-3p	2152.85	-0.190721	0.27745	-0.687409	0.491825	0.838153
hsa-miR-543	124.757	0.241861	0.356103	0.679189	0.497018	0.838153
hsa-miR-127-3p	151374	-0.196378	0.289169	-0.679113	0.497066	0.838153
hsa-miR-4739	10.3956	0.410676	0.600136	0.684306	0.493782	0.838153
hsa-miR-3180-5p	16.4028	0.312513	0.461244	0.677545	0.49806	0.838245
hsa-miR-941	2098.98	-0.179203	0.266664	-0.672019	0.501572	0.839127
hsa-miR-4649-5p	172.102	0.392058	0.590599	0.663832	0.506798	0.839127
hsa-miR-3940-3p	21.9777	-0.234905	0.352952	-0.665545	0.505702	0.839127
hsa-miR-6737-5p	726.079	-0.499686	0.741057	-0.674289	0.500128	0.839127
hsa-miR-3653-5p	456.858	-0.39506	0.593903	-0.665192	0.505928	0.839127
hsa-miR-1273a	13.7705	0.370329	0.555907	0.666171	0.505302	0.839127
hsa-miR-671-5p	94.5841	-0.175912	0.265741	-0.661968	0.507992	0.839127
hsa-miR-6803-5p	12.5819	0.341353	0.509332	0.670197	0.502732	0.839127
hsa-miR-210-3p	334.179	0.317166	0.478506	0.662824	0.507443	0.839127
hsa-miR-6787-5p	299.42	-0.13808	0.20511	-0.673201	0.500819	0.839127
hsa-miR-182-5p	170.183	0.323853	0.498327	0.64988	0.51577	0.847821
hsa-miR-6852-5p	29.9612	0.177359	0.273129	0.649359	0.516106	0.847821
hsa-miR-377-5p	316.992	-0.258984	0.398251	-0.650305	0.515495	0.847821
hsa-miR-557	41.963	-0.488089	0.773216	-0.631244	0.527881	0.849687
hsa-miR-655-3p	30.9935	-0.301063	0.471618	-0.638363	0.523238	0.849687
hsa-miR-615-3p	1103.59	-0.268211	0.419274	-0.639702	0.522366	0.849687
hsa-miR-548o-3p	72.3722	-0.212817	0.331717	-0.641563	0.521157	0.849687
hsa-miR-151a-5p	31165.3	-0.212789	0.333739	-0.637591	0.52374	0.849687
hsa-miR-505-5p	16.3037	-0.234839	0.372719	-0.630069	0.528649	0.849687
hsa-miR-6071	36.5209	0.215303	0.335751	0.641259	0.521354	0.849687
hsa-miR-6822-5p	140.205	0.3628	0.575052	0.6309	0.528106	0.849687
hsa-miR-212-5p	102.716	-0.269976	0.424973	-0.635279	0.525246	0.849687
hsa-miR-339-5p	40.3944	-0.25988	0.407951	-0.637037	0.524101	0.849687
hsa-let-7c-3p	72.5719	-0.244676	0.381778	-0.640886	0.521596	0.849687
hsa-miR-151b	31375	-0.209391	0.332349	-0.630033	0.528673	0.849687
hsa-miR-125b-1-3p	7342.13	0.116469	0.187306	0.621812	0.534066	0.853739
hsa-miR-130b-3p	1294.77	-0.195746	0.314084	-0.623229	0.533134	0.853739
hsa-miR-212-3p	128.235	-0.210058	0.337191	-0.622963	0.533309	0.853739
hsa-miR-6771-3p	28.6007	-0.339539	0.549968	-0.617379	0.536985	0.854552
hsa-miR-16-2-3p	280.172	-0.20001	0.323804	-0.617689	0.53678	0.854552
hsa-miR-548ao-3p	11.4221	-0.261084	0.423797	-0.616059	0.537855	0.854552
hsa-miR-379-3p	149.469	-0.24819	0.403414	-0.615225	0.538406	0.854552
hsa-miR-4286	411.914	-0.20078	0.327524	-0.613023	0.539861	0.85534
hsa-miR-502-5p	15.3559	-0.27334	0.45233	-0.604294	0.545648	0.862976
hsa-miR-3607-5p	2939.38	-0.326284	0.542492	-0.601454	0.547538	0.864431
hsa-miR-129-5p	93.3483	-0.26679	0.449035	-0.594141	0.552418	0.866005
hsa-miR-665	20.7606	0.210516	0.352784	0.596727	0.55069	0.866005
hsa-miR-4423-3p	59.7139	-0.187222	0.314411	-0.59547	0.55153	0.866005
hsa-miR-8088	9.45938	-0.255416	0.429176	-0.595132	0.551755	0.866005
hsa-miR-3677-3p	12.5587	0.27385	0.466939	0.58648	0.557553	0.872521
hsa-miR-4309	142.852	-0.193075	0.331132	-0.583075	0.559843	0.874013
hsa-miR-550b-3p	34.2291	-0.188465	0.32374	-0.58215	0.560466	0.874013
hsa-miR-26b-3p	134.961	-0.199681	0.345818	-0.577415	0.563659	0.877458
hsa-miR-26a-5p	313467	-0.1916	0.338793	-0.565537	0.571709	0.885465
hsa-miR-548e-5p	22.822	-0.1867	0.330618	-0.564699	0.572279	0.885465
hsa-miR-6837-5p	18.4693	0.311226	0.552167	0.563644	0.572996	0.885465
hsa-miR-3928-3p	50.8519	-0.165862	0.292914	-0.566249	0.571225	0.885465
hsa-miR-382-5p	391.961	-0.223544	0.397401	-0.562515	0.573765	0.885465
hsa-miR-6793-3p	10.2956	0.311062	0.554878	0.560595	0.575074	0.885951
hsa-miR-199a-3p	38686.2	-0.215667	0.385876	-0.558901	0.576229	0.886201
hsa-miR-10a-5p	82933.9	-0.236567	0.437947	-0.540174	0.589077	0.887905
hsa-miR-1268a	76.177	0.178761	0.325617	0.548993	0.58301	0.887905
hsa-miR-106b-5p	284.648	-0.188878	0.348628	-0.541776	0.587973	0.887905
hsa-miR-101-3p	2858.32	-0.28827	0.524189	-0.549935	0.582364	0.887905
hsa-miR-3145-5p	9.51529	-0.212823	0.395179	-0.538547	0.5902	0.887905
hsa-miR-193a-3p	688.05	-0.30848	0.564196	-0.546761	0.584543	0.887905
hsa-miR-937-3p	13.937	-0.243212	0.44005	-0.552691	0.580475	0.887905
hsa-miR-3135b	16.4622	-0.196192	0.364374	-0.538434	0.590278	0.887905
hsa-miR-6087	395.407	0.282991	0.511213	0.553567	0.579875	0.887905
hsa-miR-185-5p	177.769	0.279916	0.516917	0.541511	0.588155	0.887905
hsa-miR-1291	183.009	-0.275791	0.503315	-0.547948	0.583727	0.887905
hsa-miR-4455	89.0074	-0.299284	0.555828	-0.538446	0.590269	0.887905
hsa-miR-362-5p	77.3813	-0.274057	0.497149	-0.551259	0.581456	0.887905
hsa-miR-3613-5p	38.3659	-0.202901	0.381138	-0.532356	0.594479	0.88807
hsa-miR-6729-3p	8.51827	-0.231629	0.43566	-0.531675	0.594951	0.88807
hsa-miR-4690-5p	46.6815	0.267716	0.503447	0.531767	0.594888	0.88807
hsa-miR-29a-5p	154.122	-0.21514	0.405102	-0.531077	0.595365	0.88807
hsa-miR-29b-1-5p	91.6392	-0.205982	0.384163	-0.536185	0.59183	0.88807
hsa-miR-450a-5p	728.119	-0.183991	0.347961	-0.528769	0.596966	0.888971
hsa-miR-4284	803.367	0.282667	0.538755	0.524668	0.599814	0.891723
hsa-miR-487b-3p	661.689	-0.182559	0.349709	-0.52203	0.601649	0.892228
hsa-miR-3180	8.54578	-0.26413	0.506671	-0.521305	0.602154	0.892228
hsa-miR-1910-5p	19.8309	-0.294588	0.575179	-0.512168	0.608534	0.892783
hsa-miR-629-3p	27.7863	0.19506	0.377477	0.516746	0.605333	0.892783
hsa-miR-188-5p	23.1982	-0.253594	0.490623	-0.516882	0.605239	0.892783
hsa-miR-4762-5p	10.7627	-0.207276	0.401763	-0.515915	0.605914	0.892783
hsa-miR-4300	13.9762	-0.301586	0.587603	-0.513249	0.607777	0.892783
hsa-miR-29c-3p	308.493	-0.31886	0.621154	-0.513334	0.607717	0.892783
hsa-miR-6131	25268.9	-0.183935	0.362065	-0.508017	0.611441	0.894108
hsa-miR-936	8.41922	-0.239079	0.469722	-0.50898	0.610766	0.894108
hsa-miR-326	26.801	-0.211785	0.418168	-0.506458	0.612535	0.894241
hsa-miR-320b	11.1961	0.247157	0.494897	0.499411	0.61749	0.900001
hsa-miR-101-5p	25.0844	-0.238261	0.5167	-0.46112	0.644712	0.90074
hsa-miR-197-3p	2491.63	-0.17253	0.366138	-0.471217	0.637486	0.90074
hsa-miR-6780a-3p	19.3097	-0.234475	0.509336	-0.460355	0.645261	0.90074
hsa-miR-1343-3p	26.0902	-0.212274	0.444556	-0.477496	0.633009	0.90074
hsa-miR-7-5p	16.6564	0.181567	0.367547	0.493997	0.621308	0.90074
hsa-miR-523-3p	8.31514	0.224823	0.478994	0.469366	0.638808	0.90074
hsa-miR-6802-5p	39.9583	-0.30555	0.640885	-0.476763	0.633531	0.90074
hsa-miR-191-3p	45.6392	-0.160038	0.33165	-0.482552	0.629414	0.90074
hsa-miR-6767-5p	22.4168	-0.276276	0.591882	-0.466775	0.640661	0.90074
hsa-miR-760	9.15058	-0.225034	0.466095	-0.482806	0.629233	0.90074
hsa-miR-337-3p	289.163	-0.185774	0.389767	-0.476628	0.633627	0.90074
hsa-miR-542-5p	46.8153	-0.187209	0.405847	-0.461281	0.644597	0.90074
hsa-miR-136-3p	2298.57	-0.16134	0.34814	-0.463436	0.643052	0.90074
hsa-miR-3074-5p	4410.93	-0.141285	0.297061	-0.475608	0.634354	0.90074
hsa-let-7a-3p	550.655	-0.126446	0.271303	-0.466068	0.641167	0.90074
hsa-miR-155-5p	3032.65	-0.130631	0.271231	-0.481623	0.630074	0.90074
hsa-miR-654-3p	13885.2	-0.162185	0.334317	-0.485123	0.627589	0.90074
hsa-miR-4668-5p	280.147	-0.18657	0.403286	-0.462624	0.643634	0.90074
hsa-miR-130b-5p	803.284	-0.176748	0.356042	-0.496424	0.619595	0.90074
hsa-miR-3124-5p	11.3856	-0.260933	0.529272	-0.493003	0.62201	0.90074
hsa-miR-4289	12.8482	0.183343	0.387425	0.473235	0.636046	0.90074
hsa-miR-2110	31.5405	-0.151171	0.326659	-0.462779	0.643523	0.90074
hsa-miR-603	13.1694	-0.271877	0.57423	-0.473463	0.635883	0.90074
hsa-miR-5581-3p	12.3344	0.176076	0.36116	0.487529	0.625884	0.90074
hsa-miR-296-3p	56.2319	-0.136294	0.291747	-0.467164	0.640382	0.90074
hsa-miR-6850-3p	676.94	0.143054	0.305564	0.468164	0.639668	0.90074
hsa-miR-2682-3p	11.0967	0.197284	0.421072	0.468529	0.639407	0.90074
hsa-miR-10b-5p	111772	0.190264	0.419882	0.453136	0.650451	0.906566
hsa-miR-6502-5p	51.0979	0.126838	0.283058	0.448098	0.654083	0.907374
hsa-miR-640	56.766	-0.17627	0.392338	-0.44928	0.65323	0.907374
hsa-miR-5680	18.9373	-0.196876	0.438543	-0.448931	0.653481	0.907374
hsa-miR-590-3p	52.5806	0.20552	0.474174	0.433428	0.664704	0.911593
hsa-miR-1295a	10.9423	0.250448	0.578924	0.432608	0.665299	0.911593
hsa-miR-7706	195.687	-0.172283	0.397408	-0.433515	0.66464	0.911593
hsa-miR-137	36.631	-0.241725	0.552435	-0.437564	0.661703	0.911593
hsa-miR-4751	225.231	-0.143722	0.328619	-0.437352	0.661856	0.911593
hsa-miR-548ay-5p	12.6732	0.14398	0.325688	0.442079	0.658432	0.911593
hsa-miR-301a-3p	311.503	-0.184799	0.424878	-0.434946	0.663602	0.911593
hsa-miR-4306	36.8267	0.196235	0.451812	0.43433	0.664049	0.911593
hsa-miR-1185-2-3p	10.3842	-0.206204	0.486037	-0.424256	0.671379	0.913802
hsa-miR-2861	21.3086	0.285858	0.666715	0.428756	0.668101	0.913802
hsa-miR-7162-3p	76.7762	-0.158262	0.373508	-0.423719	0.671771	0.913802
hsa-miR-3913-3p	16.8909	-0.18072	0.426872	-0.423359	0.672033	0.913802
hsa-miR-3158-3p	57.1129	-0.127436	0.298274	-0.427244	0.669201	0.913802
hsa-miR-181a-3p	543.505	0.143167	0.340812	0.420076	0.67443	0.914528
hsa-miR-3185	11.1322	0.191844	0.45697	0.419818	0.674618	0.914528
hsa-miR-1268b	65.3176	0.145651	0.350798	0.415201	0.677995	0.915906
hsa-miR-23a-5p	130.065	-0.138919	0.335378	-0.414217	0.678715	0.915906
hsa-miR-374a-3p	375.622	0.202733	0.489355	0.414287	0.678664	0.915906
hsa-miR-335-5p	352.965	-0.237268	0.578018	-0.410486	0.681449	0.918206
hsa-miR-380-3p	39.0018	-0.198513	0.493722	-0.402074	0.687629	0.920969
hsa-miR-452-5p	158.878	-0.133954	0.33137	-0.404243	0.686034	0.920969
hsa-miR-504-5p	29.0126	-0.241554	0.596437	-0.404994	0.685482	0.920969
hsa-miR-1303	34.0837	0.144605	0.358978	0.402824	0.687078	0.920969
hsa-miR-148a-3p	22406.4	0.172516	0.434922	0.396659	0.691619	0.924924
hsa-miR-337-5p	62.7442	-0.156997	0.426652	-0.367975	0.712892	0.924939
hsa-miR-515-5p	9.92765	-0.223622	0.598963	-0.373349	0.708888	0.924939
hsa-miR-3159	9.28566	0.228117	0.59155	0.385626	0.699774	0.924939
hsa-miR-411-5p	14237	-0.134638	0.34654	-0.38852	0.697631	0.924939
hsa-miR-888-5p	14.0544	0.162032	0.442552	0.366131	0.714267	0.924939
hsa-miR-3129-3p	32.1739	-0.155042	0.406523	-0.381386	0.702917	0.924939
hsa-miR-494-3p	213.134	-0.17454	0.465528	-0.374929	0.707713	0.924939
hsa-miR-3176	35.7826	0.149763	0.402853	0.371756	0.710075	0.924939
hsa-miR-4804-5p	8.60325	0.148398	0.391316	0.379227	0.704519	0.924939
hsa-miR-28-5p	1678.35	-0.155956	0.398368	-0.391488	0.695437	0.924939
hsa-miR-1252-3p	39.9038	-0.171572	0.438097	-0.391629	0.695332	0.924939
hsa-miR-5571-5p	9.72856	0.189823	0.512084	0.370687	0.710871	0.924939
hsa-miR-616-5p	26.4494	-0.145567	0.38654	-0.376589	0.706479	0.924939
hsa-miR-100-5p	215470	0.203222	0.554185	0.366705	0.713839	0.924939
hsa-miR-377-3p	72.9453	0.154102	0.41231	0.373753	0.708588	0.924939
hsa-miR-574-3p	4411.18	-0.116434	0.318181	-0.365937	0.714412	0.924939
hsa-miR-26a-2-3p	173.037	-0.158523	0.430647	-0.368103	0.712796	0.924939
hsa-miR-181b-2-3p	8.66586	0.191127	0.522354	0.365896	0.714443	0.924939
hsa-miR-502-3p	58.7776	-0.182339	0.477993	-0.381468	0.702856	0.924939
hsa-miR-584-5p	256.895	-0.18338	0.474226	-0.386693	0.698983	0.924939
hsa-miR-4783-5p	1408.02	0.204047	0.516333	0.395185	0.692707	0.924939
hsa-miR-26a-1-3p	13.2174	-0.166651	0.454674	-0.366528	0.713971	0.924939
hsa-miR-432-5p	225.29	-0.105836	0.293961	-0.360033	0.718822	0.926875
hsa-miR-7153-3p	9.89203	-0.202981	0.565836	-0.358727	0.719799	0.926875
hsa-miR-222-5p	257.208	0.178691	0.498674	0.358332	0.720095	0.926875
hsa-miR-6770-3p	9.85669	-0.136316	0.377483	-0.361118	0.718011	0.926875
hsa-miR-199a-5p	22555.3	-0.1407	0.394904	-0.356289	0.721624	0.927505
hsa-miR-5590-5p	16.2427	0.151601	0.430126	0.352457	0.724495	0.92852
hsa-miR-7112-3p	24.3024	-0.140152	0.396987	-0.353038	0.72406	0.92852
hsa-miR-3074-3p	10.485	0.19367	0.553116	0.350143	0.726231	0.929409
hsa-miR-1299	14.3694	-0.218844	0.635914	-0.34414	0.730741	0.932789
hsa-miR-6768-5p	35.5493	0.115178	0.334973	0.343844	0.730964	0.932789
hsa-miR-221-5p	7926.64	-0.142188	0.454444	-0.312885	0.754368	0.935878
hsa-miR-6749-3p	14.5233	-0.131202	0.41829	-0.313663	0.753777	0.935878
hsa-miR-8079	22.7313	-0.225328	0.693138	-0.325084	0.745118	0.935878
hsa-miR-3609	24.729	0.117518	0.370615	0.317088	0.751177	0.935878
hsa-miR-320c	14.6702	0.141611	0.446934	0.316851	0.751357	0.935878
hsa-miR-145-3p	29.5007	-0.223128	0.679821	-0.328216	0.742749	0.935878
hsa-let-7g-3p	19.2657	-0.105713	0.312829	-0.337927	0.735418	0.935878
hsa-miR-638	10.6381	0.156583	0.499405	0.31354	0.75387	0.935878
hsa-miR-584-3p	10.1476	-0.210648	0.660708	-0.318821	0.749862	0.935878
hsa-miR-487a-3p	76.1735	0.12864	0.395832	0.324986	0.745191	0.935878
hsa-miR-3929	9.4948	0.179185	0.538012	0.333049	0.739097	0.935878
hsa-miR-7-1-3p	14.6915	-0.126487	0.398392	-0.317494	0.750869	0.935878
hsa-miR-3687	11.6041	-0.148528	0.454693	-0.326655	0.743929	0.935878
hsa-miR-652-3p	66.0978	0.112537	0.348782	0.322657	0.746955	0.935878
hsa-miR-219a-1-3p	12.1633	0.118682	0.378464	0.313588	0.753834	0.935878
hsa-miR-3620-3p	17.4936	0.153285	0.489275	0.313291	0.75406	0.935878
hsa-miR-31-3p	348.814	-0.108998	0.347441	-0.313717	0.753736	0.935878
hsa-miR-6874-5p	15.5648	-0.125725	0.396972	-0.316711	0.751463	0.935878
hsa-miR-539-5p	39.8186	-0.12372	0.373483	-0.33126	0.740448	0.935878
hsa-miR-4801	23.5886	-0.153907	0.464057	-0.331655	0.74015	0.935878
hsa-miR-1307-3p	600.474	-0.0845939	0.271605	-0.311459	0.755452	0.935921
hsa-miR-302a-3p	22.8855	0.199643	0.655886	0.304387	0.760833	0.938514
hsa-miR-369-3p	322.899	0.1469	0.483379	0.303903	0.761202	0.938514
hsa-miR-17-3p	34.1451	0.123692	0.414693	0.298272	0.765495	0.938514
hsa-miR-4451	30.3487	-0.144767	0.474423	-0.305144	0.760257	0.938514
hsa-miR-181b-5p	3591.28	-0.125496	0.417466	-0.300614	0.763709	0.938514
hsa-miR-491-5p	9.20497	-0.113701	0.38198	-0.297661	0.765962	0.938514
hsa-miR-146a-5p	592.331	0.155654	0.520135	0.299257	0.764744	0.938514
hsa-miR-370-3p	646.113	-0.0975917	0.325772	-0.299571	0.764505	0.938514
hsa-miR-576-3p	53.4921	-0.0674416	0.240012	-0.280992	0.778716	0.940287
hsa-miR-424-5p	1217.51	0.128737	0.456534	0.281989	0.777952	0.940287
hsa-miR-4687-3p	16.0815	-0.146656	0.5029	-0.291621	0.770577	0.940287
hsa-miR-126-5p	175.843	-0.116878	0.432468	-0.270258	0.786962	0.940287
hsa-miR-4750-3p	12.9555	-0.112489	0.404562	-0.278051	0.780973	0.940287
hsa-miR-4521	17.9027	0.108631	0.391643	0.277373	0.781494	0.940287
hsa-miR-6777-3p	13.2843	0.112211	0.41235	0.272126	0.785525	0.940287
hsa-miR-6511a-3p	25.0123	-0.129008	0.478448	-0.269639	0.787438	0.940287
hsa-miR-8071	11.9942	0.206488	0.733954	0.281337	0.778452	0.940287
hsa-miR-450b-5p	384.517	0.115588	0.402498	0.287177	0.773977	0.940287
hsa-miR-4661-3p	12.212	0.119692	0.4349	0.275218	0.783149	0.940287
hsa-miR-5581-5p	14.7682	0.187322	0.690602	0.271245	0.786203	0.940287
hsa-miR-1538	18.1366	-0.110337	0.407179	-0.270978	0.786408	0.940287
hsa-miR-548ap-3p	17.917	-0.0888838	0.303023	-0.293324	0.769275	0.940287
hsa-miR-5699-3p	19.5223	0.106191	0.370989	0.286237	0.774696	0.940287
hsa-miR-99b-5p	43393.3	-0.135225	0.490817	-0.27551	0.782925	0.940287
hsa-miR-1285-3p	122.528	-0.0895832	0.327418	-0.273605	0.784388	0.940287
hsa-miR-3123	17.8405	0.151373	0.524501	0.288603	0.772885	0.940287
hsa-miR-5000-5p	8.10453	0.119154	0.425365	0.280122	0.779384	0.940287
hsa-miR-376a-3p	113.719	0.103865	0.395367	0.262705	0.792778	0.942877
hsa-miR-424-3p	2534.99	0.101202	0.384448	0.263241	0.792365	0.942877
hsa-miR-6774-5p	19.1625	0.154633	0.585331	0.26418	0.791641	0.942877
hsa-miR-92a-1-5p	25.8705	0.0728069	0.284546	0.25587	0.798051	0.947667
hsa-miR-548c-5p	10.6144	0.120389	0.472611	0.254732	0.79893	0.947667
hsa-miR-25-5p	58.7024	-0.0694936	0.276755	-0.251101	0.801736	0.949732
hsa-miR-2116-3p	69.2906	-0.0777019	0.313623	-0.247756	0.804324	0.951534
hsa-miR-21-3p	10720	-0.0709483	0.291048	-0.243769	0.80741	0.95392
hsa-miR-4442	26.6998	0.102373	0.442088	0.231568	0.816874	0.960121
hsa-miR-2467-5p	8.46824	-0.097305	0.420411	-0.231452	0.816964	0.960121
hsa-miR-3120-5p	1681.69	-0.0593592	0.253639	-0.23403	0.814962	0.960121
hsa-miR-532-3p	137.833	0.122199	0.52094	0.234574	0.814539	0.960121
hsa-miR-1297	18.055	-0.10724	0.466484	-0.22989	0.818177	0.960281
hsa-miR-2355-5p	35.499	-0.0847778	0.37875	-0.223836	0.822885	0.960905
hsa-miR-550a-3-5p	24.6308	-0.0747988	0.336505	-0.222282	0.824095	0.960905
hsa-miR-498	10.6809	-0.125066	0.559183	-0.223659	0.823023	0.960905
hsa-miR-1255a	12.0627	0.108256	0.481995	0.224601	0.82229	0.960905
hsa-miR-3200-3p	37.4345	-0.0790079	0.354226	-0.223044	0.823502	0.960905
hsa-miR-519d-3p	9.8376	-0.161792	0.749911	-0.215749	0.829184	0.964318
hsa-miR-219a-5p	13.6798	0.0900527	0.416687	0.216116	0.828897	0.964318
hsa-miR-3912-3p	12.1578	-0.0822698	0.384258	-0.2141	0.830469	0.964555
hsa-miR-4530	20.9052	0.108655	0.514786	0.211068	0.832834	0.965682
hsa-miR-6784-3p	11.3119	-0.0758056	0.36084	-0.210081	0.833604	0.965682
hsa-miR-21-5p	325205	-0.0760337	0.372343	-0.204203	0.838195	0.967231
hsa-let-7i-3p	147.824	0.0748079	0.365498	0.204674	0.837827	0.967231
hsa-miR-770-5p	19.3209	0.0811375	0.393471	0.20621	0.836627	0.967231
hsa-miR-654-5p	150.376	-0.0735433	0.368621	-0.19951	0.841864	0.96771
hsa-miR-409-5p	927.093	-0.143955	0.715536	-0.201185	0.840554	0.96771
hsa-miR-450a-2-3p	11.869	-0.0872027	0.434155	-0.200856	0.840811	0.96771
hsa-miR-525-5p	8.73895	0.112726	0.571197	0.197351	0.843553	0.968403
hsa-miR-340-5p	331.442	-0.0755713	0.452516	-0.167002	0.867368	0.972297
hsa-miR-7705	9.62094	0.0586214	0.367037	0.159715	0.873105	0.972297
hsa-miR-615-5p	55.127	-0.0776619	0.416494	-0.186466	0.85208	0.972297
hsa-miR-1245b-3p	24.7129	0.0888879	0.494472	0.179763	0.857338	0.972297
hsa-miR-24-2-5p	366.335	-0.0651	0.343475	-0.189533	0.849675	0.972297
hsa-miR-889-3p	534.269	-0.0750031	0.407744	-0.183947	0.854055	0.972297
hsa-miR-6751-5p	10.56	0.0802174	0.499714	0.160527	0.872466	0.972297
hsa-miR-1304-5p	28.0455	0.0751723	0.459169	0.163714	0.869956	0.972297
hsa-miR-6864-5p	11.2334	-0.0810784	0.464059	-0.174716	0.861303	0.972297
hsa-miR-3622b-3p	21.1552	-0.0951158	0.574982	-0.165424	0.86861	0.972297
hsa-miR-1271-5p	797.185	-0.126917	0.694355	-0.182784	0.854967	0.972297
hsa-miR-485-3p	252.791	-0.0562517	0.319308	-0.176168	0.860162	0.972297
hsa-miR-6857-5p	17.0058	0.0640077	0.392992	0.162873	0.870619	0.972297
hsa-miR-4681	69.9659	0.110445	0.671819	0.164397	0.869419	0.972297
hsa-miR-125b-5p	155861	-0.0652902	0.360742	-0.180989	0.856377	0.972297
hsa-miR-320e	27.0046	0.0622784	0.358225	0.173852	0.861981	0.972297
hsa-miR-3161	17.9206	0.0918795	0.518492	0.177205	0.859347	0.972297
hsa-miR-342-3p	958.532	-0.0771286	0.414541	-0.186058	0.852399	0.972297
hsa-miR-548au-5p	14.6009	0.0741291	0.463144	0.160057	0.872837	0.972297
hsa-miR-29a-3p	26750	-0.0799767	0.433942	-0.184303	0.853776	0.972297
hsa-miR-561-5p	29.5975	0.0739039	0.460729	0.160406	0.872561	0.972297
hsa-miR-5010-3p	19.6382	0.0704024	0.426168	0.165199	0.868788	0.972297
hsa-miR-218-5p	1490.5	-0.055285	0.342978	-0.161191	0.871943	0.972297
hsa-miR-4301	8.94591	-0.0794723	0.484089	-0.164169	0.869598	0.972297
hsa-miR-598-3p	15.7332	-0.0833247	0.52688	-0.158147	0.874341	0.972459
hsa-miR-877-5p	122.42	-0.04666	0.309197	-0.150907	0.880049	0.97298
hsa-miR-374b-5p	100.064	0.0664156	0.432531	0.153551	0.877964	0.97298
hsa-miR-656-3p	104.835	-0.0658048	0.447349	-0.147099	0.883054	0.97298
hsa-miR-496	10.258	-0.0563426	0.388282	-0.145107	0.884626	0.97298
hsa-miR-548e-3p	68.4884	0.0601687	0.404043	0.148916	0.88162	0.97298
hsa-miR-1185-1-3p	61.77	-0.0664862	0.456853	-0.145531	0.884292	0.97298
hsa-miR-3152-5p	128.747	0.0514534	0.337882	0.152282	0.878964	0.97298
hsa-miR-3126-5p	9.2682	-0.0597749	0.399102	-0.149773	0.880943	0.97298
hsa-miR-145-5p	2931.76	-0.0816414	0.525124	-0.155471	0.87645	0.97298
hsa-miR-222-3p	205031	-0.0501534	0.350617	-0.143043	0.886256	0.973482
hsa-miR-376c-3p	386.669	-0.0730443	0.515251	-0.141765	0.887266	0.973482
hsa-miR-618	10.2937	-0.0580201	0.41637	-0.139347	0.889176	0.974379
hsa-miR-22-3p	518991	-0.0440513	0.329216	-0.133807	0.893555	0.977977
hsa-miR-2115-5p	11.3736	0.0588324	0.445706	0.131998	0.894986	0.978342
hsa-miR-376b-3p	23.5633	0.0602769	0.507614	0.118745	0.905477	0.978528
hsa-miR-215-5p	24.9325	-0.0459078	0.408466	-0.112391	0.910514	0.978528
hsa-miR-323b-3p	124.63	-0.0471179	0.384851	-0.122432	0.902557	0.978528
hsa-miR-1307-5p	785.061	-0.0507653	0.424364	-0.119627	0.904779	0.978528
hsa-miR-3651	43.6518	-0.0461127	0.398824	-0.115622	0.907952	0.978528
hsa-miR-4668-3p	9.93521	0.0445169	0.391911	0.113589	0.909564	0.978528
hsa-miR-374a-5p	209.391	0.0473983	0.388178	0.122105	0.902816	0.978528
hsa-miR-668-3p	31.2973	-0.0568826	0.465679	-0.12215	0.90278	0.978528
hsa-miR-374c-3p	97.4427	0.0514181	0.438673	0.117213	0.906691	0.978528
hsa-miR-4701-3p	9.31383	-0.0488214	0.390311	-0.125083	0.900458	0.978528
hsa-miR-510-5p	24.2038	0.0709201	0.588645	0.12048	0.904103	0.978528
hsa-miR-940	34.5139	-0.0607888	0.47317	-0.128471	0.897776	0.978528
hsa-let-7i-5p	84168.8	-0.0402543	0.350827	-0.114741	0.90865	0.978528
hsa-miR-34c-3p	70.1276	-0.0453976	0.392696	-0.115605	0.907966	0.978528
hsa-miR-32-3p	8.04207	-0.057232	0.516942	-0.110713	0.911844	0.97864
hsa-miR-370-5p	17.9017	0.0411597	0.385658	0.106726	0.915007	0.97864
hsa-miR-1249-3p	70.4076	0.0374054	0.346155	0.10806	0.913948	0.97864
hsa-miR-19b-3p	179.855	-0.0436533	0.401848	-0.108631	0.913495	0.97864
hsa-miR-4448	156.872	0.0484475	0.4675	0.103631	0.917462	0.978919
hsa-miR-4781-3p	19.3129	0.0431062	0.415011	0.103867	0.917275	0.978919
hsa-miR-1228-5p	19.5462	0.038405	0.40342	0.0951987	0.924157	0.980789
hsa-miR-664a-5p	20.2469	-0.0390694	0.446096	-0.0875808	0.93021	0.980789
hsa-miR-4500	15.3463	-0.0313469	0.343507	-0.0912556	0.92729	0.980789
hsa-miR-548f-5p	8.17827	-0.0395117	0.43887	-0.0900305	0.928263	0.980789
hsa-miR-1304-3p	61.221	0.0717577	0.76796	0.0934394	0.925554	0.980789
hsa-miR-1226-3p	35.65	-0.0348286	0.385163	-0.0904255	0.927949	0.980789
hsa-miR-1294	12.1036	-0.038718	0.416452	-0.0929711	0.925927	0.980789
hsa-miR-27a-3p	4770.73	-0.0297321	0.307821	-0.0965889	0.923053	0.980789
hsa-miR-542-3p	269.533	-0.0459401	0.482548	-0.0952031	0.924154	0.980789
hsa-miR-4791	9.73719	0.0521886	0.590928	0.0883163	0.929625	0.980789
hsa-miR-2355-3p	9.56952	-0.0425637	0.509071	-0.0836105	0.933366	0.981795
hsa-miR-500b-5p	23.4943	0.0296898	0.351587	0.0844453	0.932702	0.981795
hsa-miR-7976	21.2307	-0.0342768	0.449947	-0.0761797	0.939276	0.983374
hsa-miR-4485-5p	57.8534	0.0367966	0.467528	0.0787046	0.937268	0.983374
hsa-miR-6511b-3p	27.5991	0.0309639	0.402643	0.0769018	0.938702	0.983374
hsa-miR-340-3p	42.6535	-0.0331268	0.414043	-0.0800081	0.936231	0.983374
hsa-miR-887-5p	69.0152	0.0217067	0.290287	0.0747768	0.940392	0.983388
hsa-miR-501-3p	497.122	-0.0425855	0.593971	-0.0716962	0.942844	0.983645
hsa-miR-4461	47.4362	-0.0230024	0.315726	-0.0728555	0.941921	0.983645
hsa-miR-4644	8.5463	-0.041814	0.613306	-0.068178	0.945644	0.985414
hsa-let-7a-2-3p	21.0598	-0.0218463	0.337739	-0.0646841	0.948426	0.987159
hsa-miR-365a-3p	1458.92	-0.0187012	0.328971	-0.0568477	0.954667	0.99026
hsa-miR-136-5p	24.5924	-0.0333938	0.603124	-0.0553681	0.955845	0.99026
hsa-miR-6746-3p	9.96105	0.0274835	0.489417	0.0561556	0.955218	0.99026
hsa-miR-766-3p	202.3	-0.0260317	0.454884	-0.057227	0.954364	0.99026
hsa-miR-493-3p	486.041	0.0175027	0.344326	0.0508319	0.959459	0.992851
hsa-miR-641	39.6132	0.0153153	0.325825	0.0470048	0.962509	0.993303
hsa-miR-148a-5p	227.392	-0.0131897	0.372094	-0.0354473	0.971723	0.993303
hsa-miR-8084	15.2985	-0.0133422	0.572801	-0.023293	0.981417	0.993303
hsa-miR-6853-3p	9.05427	-0.0213653	0.463434	-0.0461021	0.963229	0.993303
hsa-miR-383-5p	9.03245	-0.0145013	0.664566	-0.0218208	0.982591	0.993303
hsa-miR-4520-2-3p	10.3848	-0.0125711	0.374729	-0.0335472	0.973238	0.993303
hsa-miR-425-3p	21.2434	-0.00982811	0.351031	-0.0279978	0.977664	0.993303
hsa-miR-423-5p	10402.2	0.0102905	0.32652	0.0315156	0.974858	0.993303
hsa-miR-5586-3p	10.6703	-0.0173504	0.484686	-0.0357972	0.971444	0.993303
hsa-miR-550a-5p	12.5769	-0.015933	0.36243	-0.0439617	0.964935	0.993303
hsa-miR-455-3p	544.227	0.0182165	0.440259	0.0413768	0.966995	0.993303
hsa-miR-6740-3p	11.1848	-0.0137872	0.638251	-0.0216015	0.982766	0.993303
hsa-miR-431-3p	90.0397	-0.00677216	0.323165	-0.0209557	0.983281	0.993303
hsa-miR-744-5p	233.996	-0.00638931	0.287525	-0.0222218	0.982271	0.993303
hsa-miR-138-5p	2867.66	-0.0221262	0.512465	-0.0431759	0.965561	0.993303
hsa-miR-659-5p	27.7446	-0.009629	0.327839	-0.0293711	0.976569	0.993303
hsa-miR-3184-3p	10421.1	0.00853619	0.326015	0.0261835	0.979111	0.993303
hsa-miR-99a-5p	6725.69	0.0118884	0.45957	0.0258685	0.979362	0.993303
hsa-miR-181d-5p	205.502	-0.00739363	0.33851	-0.0218417	0.982574	0.993303
hsa-miR-1254	17.8337	-0.0148672	0.362077	-0.041061	0.967247	0.993303
hsa-miR-4743-3p	27.4938	-0.0138705	0.445413	-0.0311409	0.975157	0.993303
hsa-miR-1301-3p	98.2289	-0.00928214	0.527288	-0.0176035	0.985955	0.99465
hsa-miR-4328	27.2451	-0.00766498	0.57971	-0.0132221	0.989451	0.99465
hsa-miR-19a-3p	50.0716	-0.00557784	0.503871	-0.01107	0.991168	0.99465
hsa-miR-31-5p	25162	-0.00251068	0.230383	-0.0108978	0.991305	0.99465
hsa-miR-1228-3p	10.1802	0.00750217	0.458806	0.0163515	0.986954	0.99465
hsa-miR-484	2841.7	-0.00410098	0.275254	-0.0148989	0.988113	0.99465
hsa-miR-664a-3p	127.183	-0.00294867	0.487743	-0.00604555	0.995176	0.996293
hsa-miR-181a-5p	64859.9	-0.00338246	0.497544	-0.00679832	0.994576	0.996293
hsa-miR-1245a	32859	-0.00271464	0.775015	-0.00350269	0.997205	0.997205
hsa-miR-6887-3p	4.65177	-0.193375	0.494891	-0.390743	0.695987	NA
hsa-miR-6721-5p	1.36867	-0.364507	0.737898	-0.49398	0.62132	NA
hsa-miR-375	5.41872	-0.462085	0.573139	-0.806236	0.420107	NA
hsa-miR-4524b-5p	6.32273	-0.292952	0.486334	-0.602368	0.546929	NA
hsa-miR-371b-3p	1.9113	-0.403306	0.657051	-0.613812	0.53934	NA
hsa-miR-597-3p	1.53253	0.444645	0.69139	0.643118	0.520148	NA
hsa-miR-1293	4.48765	-0.106085	0.512948	-0.206814	0.836155	NA
hsa-miR-6821-3p	4.05912	0.553903	0.628796	0.880894	0.378375	NA
hsa-miR-651-3p	0.429466	-0.0257067	0.780615	-0.0329313	0.973729	NA
hsa-miR-371a-3p	1.79424	0.27473	0.639119	0.429858	0.667299	NA
hsa-miR-6750-3p	3.61008	-0.108044	0.540651	-0.19984	0.841606	NA
hsa-miR-211-5p	0.337675	-0.66743	0.753969	-0.885223	0.376036	NA
hsa-miR-19b-1-5p	1.48595	0.0297272	0.679785	0.0437303	0.965119	NA
hsa-miR-548p	0.932697	-0.819768	0.718073	-1.14162	0.253611	NA
hsa-miR-766-5p	1.01306	0.757248	0.726157	1.04282	0.297033	NA
hsa-miR-98-3p	1.52599	-0.199588	0.702076	-0.284282	0.776194	NA
hsa-miR-4771	1.25646	0.225112	0.735342	0.306132	0.759504	NA
hsa-miR-4684-5p	1.53174	0.981978	0.718604	1.36651	0.17178	NA
hsa-miR-6827-5p	2.44953	0.61951	0.650645	0.952148	0.341022	NA
hsa-miR-3132	0.322811	0.443038	0.730831	0.606211	0.544375	NA
hsa-miR-644a	0.857685	-0.691654	0.751394	-0.920495	0.357314	NA
hsa-miR-4768-5p	5.47657	-0.576407	0.438781	-1.31366	0.188962	NA
hsa-miR-3142	0.556998	0.614012	0.772451	0.794888	0.426679	NA
hsa-miR-4800-3p	6.87701	0.0704383	0.405831	0.173565	0.862207	NA
hsa-miR-6825-5p	3.1156	0.0651757	0.584915	0.111428	0.911277	NA
hsa-miR-548a-5p	1.02092	0.00274968	0.738538	0.00372313	0.997029	NA
hsa-miR-6813-3p	0.729797	-0.71428	0.777601	-0.91857	0.358321	NA
hsa-miR-3681-3p	2.1528	-0.063408	0.656176	-0.0966326	0.923018	NA
hsa-miR-1537-5p	2.9918	1.22326	0.59614	2.05197	0.0401726	NA
hsa-miR-4714-5p	2.13569	0.526296	0.652973	0.806	0.420243	NA
hsa-miR-1238-3p	2.21195	0.837322	0.633867	1.32097	0.18651	NA
hsa-miR-6880-3p	7.15976	0.473957	0.460092	1.03014	0.302946	NA
hsa-miR-4432	1.48731	0.993961	0.744995	1.33418	0.182143	NA
hsa-miR-495-5p	3.07741	0.416564	0.568605	0.732607	0.463798	NA
hsa-miR-1238-5p	0.333312	0.669864	0.770337	0.869573	0.384534	NA
hsa-miR-6839-5p	4.41369	0.790999	0.649724	1.21744	0.223438	NA
hsa-miR-7107-3p	0.700363	0.977294	0.778868	1.25476	0.209565	NA
hsa-miR-6738-5p	1.86895	0.346495	0.747502	0.463537	0.642979	NA
hsa-miR-4523	2.003	1.07168	0.648542	1.65245	0.098443	NA
hsa-miR-3118	2.18916	-0.016374	0.634524	-0.0258052	0.979413	NA
hsa-miR-520h	0.42478	0.670175	0.778812	0.860509	0.389509	NA
hsa-miR-4307	1.77331	0.555577	0.708311	0.784369	0.432824	NA
hsa-miR-3670	1.9985	-0.239751	0.697048	-0.343951	0.730883	NA
hsa-miR-6741-3p	6.5229	-0.577499	0.474484	-1.21711	0.223562	NA
hsa-miR-1179	4.99311	-0.247449	0.460979	-0.536792	0.591412	NA
hsa-miR-4477a	1.6885	0.176915	0.717256	0.246656	0.805174	NA
hsa-miR-525-3p	0	NA	NA	NA	NA	NA
hsa-miR-639	0.433779	0.419488	0.783598	0.535336	0.592417	NA
hsa-miR-4777-3p	2.13025	1.18699	0.666494	1.78095	0.0749206	NA
hsa-miR-3660	0.0468522	0.278308	0.561084	0.496019	0.619881	NA
hsa-miR-6504-5p	0.56649	-0.254677	0.773018	-0.329459	0.741809	NA
hsa-miR-4756-3p	0.516076	1.08238	0.77976	1.3881	0.165108	NA
hsa-miR-4666a-5p	2.51512	0.911335	0.639077	1.42602	0.153863	NA
hsa-miR-6760-3p	3.36153	-0.326416	0.679972	-0.480043	0.631197	NA
hsa-miR-548au-3p	1.12252	0.858011	0.723117	1.18654	0.235407	NA
hsa-miR-5591-3p	1.4833	0.580732	0.708291	0.819906	0.41227	NA
hsa-miR-4720-5p	3.85752	0.705313	0.553033	1.27535	0.202184	NA
hsa-miR-6514-5p	3.96392	0.0258016	0.510149	0.0505767	0.959663	NA
hsa-miR-7157-3p	2.95698	0.824834	0.662217	1.24556	0.212924	NA
hsa-miR-7156-5p	1.1996	0.578381	0.736319	0.785503	0.432159	NA
hsa-miR-7154-5p	0.452129	-0.18439	0.779296	-0.236611	0.812959	NA
hsa-miR-224-3p	5.7781	-0.327127	0.559852	-0.584309	0.559012	NA
hsa-miR-345-3p	2.43801	0.0656711	0.652444	0.100654	0.919825	NA
hsa-miR-6768-3p	1.58424	-0.0756842	0.705566	-0.107267	0.914577	NA
hsa-miR-4514	0.722738	1.61769	0.77199	2.09548	0.0361282	NA
hsa-miR-4797-5p	1.01901	0.3526	0.753849	0.467733	0.639976	NA
hsa-miR-6814-3p	4.05861	0.178466	0.580306	0.307538	0.758434	NA
hsa-miR-4728-3p	7.03587	-0.394903	0.472781	-0.835278	0.403561	NA
hsa-miR-3127-5p	2.5069	0.580406	0.618791	0.937968	0.348261	NA
hsa-miR-4793-5p	2.24422	1.53021	0.674712	2.26794	0.0233326	NA
hsa-miR-1323	0.97988	1.39521	0.780474	1.78764	0.0738337	NA
hsa-miR-3690	0.582885	0.563331	0.779822	0.722383	0.470059	NA
hsa-miR-122-3p	4.81788	-0.756205	0.641996	-1.1779	0.238838	NA
hsa-miR-7159-3p	0.707239	0.0501914	0.778614	0.0644624	0.948602	NA
hsa-miR-5001-5p	2.32805	0.457441	0.59995	0.762466	0.445782	NA
hsa-miR-1265	5.68871	0.434604	0.627924	0.692128	0.488857	NA
hsa-miR-300	1.53787	-0.640765	0.690526	-0.927938	0.35344	NA
hsa-miR-6757-5p	3.5726	0.692942	0.57248	1.21042	0.226117	NA
hsa-miR-4802-5p	6.05008	1.24108	0.69997	1.77305	0.0762198	NA
hsa-miR-6882-5p	3.247	1.26769	0.590786	2.14577	0.031891	NA
hsa-miR-876-3p	3.42705	0.0724719	0.609555	0.118893	0.90536	NA
hsa-miR-590-5p	3.11928	-0.2384	0.540905	-0.440743	0.659399	NA
hsa-miR-5009-5p	2.36418	0.185771	0.597313	0.311011	0.755792	NA
hsa-miR-511-3p	0.873978	0.0435916	0.777252	0.0560843	0.955275	NA
hsa-miR-6739-5p	2.49161	0.670663	0.671453	0.998823	0.31788	NA
hsa-miR-4677-5p	3.55986	-0.34764	0.535846	-0.648769	0.516488	NA
hsa-miR-6754-5p	3.76906	0.760427	0.699562	1.087	0.277035	NA
hsa-miR-548ah-5p	0.581448	1.43305	0.775869	1.84703	0.0647431	NA
hsa-miR-6769b-5p	3.144	0.0526978	0.66048	0.0797871	0.936407	NA
hsa-miR-4704-5p	0.451937	-0.154285	0.780049	-0.197789	0.84321	NA
hsa-miR-6074	7.79137	-0.114737	0.66003	-0.173835	0.861995	NA
hsa-miR-4499	1.79863	0.297042	0.681771	0.435692	0.66306	NA
hsa-miR-4426	2.20819	2.0122	0.671246	2.99771	0.00272015	NA
hsa-miR-489-3p	1.83839	1.54038	0.659243	2.33658	0.0194608	NA
hsa-miR-662	0.254565	1.04947	0.727121	1.44332	0.148932	NA
hsa-miR-3182	7.14122	-0.255639	0.449572	-0.568626	0.56961	NA
hsa-miR-4254	3.62998	0.896746	0.644492	1.3914	0.164105	NA
hsa-miR-200c-5p	0	NA	NA	NA	NA	NA
hsa-miR-147a	0.557848	0.0856575	0.777014	0.110239	0.91222	NA
hsa-miR-4733-5p	7.14017	-0.196204	0.462978	-0.423787	0.671721	NA
hsa-miR-4261	1.95477	-0.273911	0.67266	-0.407206	0.683857	NA
hsa-miR-4270	2.73081	0.347704	0.677142	0.513489	0.60761	NA
hsa-miR-6809-3p	2.88075	0.852293	0.632042	1.34847	0.177506	NA
hsa-miR-1302	2.01243	-0.549283	0.612972	-0.896098	0.370201	NA
hsa-miR-7112-5p	4.76257	0.571539	0.552148	1.03512	0.300613	NA
hsa-miR-20b-3p	0.68084	0.461735	0.772106	0.598021	0.549826	NA
hsa-miR-4736	1.5239	0.261639	0.689038	0.379717	0.704156	NA
hsa-miR-450a-1-3p	2.0791	0.244431	0.650085	0.375998	0.706918	NA
hsa-miR-4538	1.97735	0.303432	0.662413	0.45807	0.646902	NA
hsa-miR-5093	1.68911	-0.209631	0.758788	-0.27627	0.782341	NA
hsa-miR-4999-5p	7.11515	0.951569	0.6692	1.42195	0.155041	NA
hsa-miR-5589-5p	0.463815	0.721378	0.77709	0.928307	0.353248	NA
hsa-miR-670-3p	0.0444942	0.275252	0.560318	0.491242	0.623255	NA
hsa-miR-3160-5p	1.42434	0.567143	0.704452	0.805084	0.420771	NA
hsa-miR-3622a-3p	1.41189	-0.658688	0.684452	-0.962357	0.33587	NA
hsa-miR-5195-3p	1.51151	0.260514	0.702205	0.370994	0.710642	NA
hsa-miR-215-3p	0.74211	-0.500161	0.773761	-0.646401	0.518019	NA
hsa-miR-4690-3p	2.03203	-0.339311	0.615088	-0.551647	0.58119	NA
hsa-miR-6847-5p	2.67578	0.37077	0.578611	0.640794	0.521656	NA
hsa-miR-7975	6.40732	-0.578387	0.623904	-0.927044	0.353904	NA
hsa-miR-3685	3.35139	0.0794335	0.558877	0.14213	0.886977	NA
hsa-miR-3166	0.505795	-1.11752	0.779303	-1.434	0.151571	NA
hsa-miR-3667-5p	0.417545	-0.674185	0.780488	-0.8638	0.387698	NA
hsa-miR-8056	1.01833	-0.282951	0.775205	-0.365001	0.71511	NA
hsa-miR-5186	7.02232	-0.386027	0.651223	-0.592771	0.553334	NA
hsa-miR-4506	2.2798	0.379161	0.631333	0.600572	0.548125	NA
hsa-miR-218-2-3p	1.64155	0.0965703	0.686453	0.14068	0.888123	NA
hsa-miR-488-5p	4.37136	-0.374106	0.69211	-0.54053	0.588832	NA
hsa-miR-5189-3p	3.49815	1.36547	0.614902	2.22063	0.0263757	NA
hsa-miR-105-3p	0.741894	-0.00712055	0.749742	-0.00949734	0.992422	NA
hsa-miR-4671-5p	2.10248	0.934988	0.699771	1.33614	0.181505	NA
hsa-miR-18a-3p	6.94448	-0.0919332	0.486878	-0.188822	0.850233	NA
hsa-miR-4535	3.50344	0.694244	0.567363	1.22363	0.221091	NA
hsa-miR-624-5p	6.61092	-0.3146	0.457502	-0.687646	0.491676	NA
hsa-miR-6853-5p	0.572348	1.28908	0.779033	1.65472	0.0979807	NA
hsa-miR-4496	4.34411	0.0841133	0.554054	0.151814	0.879333	NA
hsa-miR-4278	2.23279	0.911798	0.67671	1.3474	0.177852	NA
hsa-miR-4529-5p	1.83531	0.15063	0.662181	0.227476	0.820054	NA
hsa-miR-5705	5.93668	-0.298157	0.552511	-0.53964	0.589445	NA
hsa-miR-4322	0.640916	-0.682996	0.754918	-0.904728	0.36561	NA
hsa-miR-3648	4.4833	-0.0649658	0.530571	-0.122445	0.902546	NA
hsa-miR-95-5p	2.16757	1.47972	0.673539	2.19694	0.0280249	NA
hsa-miR-4287	0.396674	-0.314312	0.760399	-0.413352	0.679349	NA
hsa-miR-4759	3.83228	1.13735	0.680163	1.67217	0.0944901	NA
hsa-miR-6836-5p	2.51679	0.449886	0.605812	0.742617	0.457713	NA
hsa-miR-6842-3p	5.66226	0.0359884	0.475959	0.0756123	0.939728	NA
hsa-miR-4493	1.38228	0.574352	0.722526	0.794922	0.426659	NA
hsa-miR-1273d	5.58172	1.88384	0.606172	3.10777	0.00188507	NA
hsa-miR-513b-3p	0.47275	0.754712	0.776966	0.971358	0.33137	NA
hsa-miR-4713-3p	3.13497	0.484405	0.704849	0.687246	0.491928	NA
hsa-miR-4674	1.69503	0.360138	0.735322	0.489769	0.624297	NA
hsa-miR-3646	1.3515	1.06527	0.754977	1.411	0.158244	NA
hsa-miR-1282	3.91275	1.42009	0.64077	2.21622	0.0266764	NA
hsa-miR-133b	0	NA	NA	NA	NA	NA
hsa-miR-1269a	0.508294	0.705231	0.783602	0.899985	0.368128	NA
hsa-miR-3193	1.22767	1.10458	0.711319	1.55286	0.120456	NA
hsa-miR-1288-3p	1.82081	1.13635	0.660939	1.7193	0.0855606	NA
hsa-miR-4680-5p	2.22662	0.105812	0.602355	0.175663	0.860559	NA
hsa-miR-6084	2.63048	1.09923	0.721666	1.52318	0.127714	NA
hsa-miR-6745	2.27355	0.590188	0.633505	0.931623	0.351532	NA
hsa-miR-6733-5p	2.2967	1.09234	0.623093	1.7531	0.0795855	NA
hsa-miR-548c-3p	5.59168	0.612975	0.528861	1.15905	0.246437	NA
hsa-miR-1286	3.66686	0.460468	0.552124	0.833992	0.404285	NA
hsa-miR-4641	1.13967	1.01848	0.722829	1.40902	0.158829	NA
hsa-miR-8069	6.64513	-0.783985	0.465295	-1.68492	0.0920043	NA
hsa-miR-6889-3p	7.79081	0.600055	0.494928	1.21241	0.225356	NA
hsa-miR-8089	3.13266	-0.700029	0.652962	-1.07208	0.283683	NA
hsa-miR-6792-5p	2.45022	-0.849704	0.714194	-1.18974	0.234149	NA
hsa-miR-4662a-3p	0.405648	0.805448	0.767129	1.04995	0.293741	NA
hsa-miR-298	1.00858	-0.191567	0.778576	-0.246047	0.805646	NA
hsa-miR-6806-3p	2.20573	0.349866	0.625676	0.559181	0.576038	NA
hsa-miR-4748	1.8208	-0.703113	0.660989	-1.06373	0.287452	NA
hsa-miR-541-5p	4.58928	-0.120851	0.542686	-0.222691	0.823776	NA
hsa-miR-6884-3p	2.69155	0.5477	0.657463	0.833051	0.404816	NA
hsa-miR-3680-5p	3.05503	0.910161	0.567699	1.60325	0.10888	NA
hsa-miR-6892-3p	7.07696	0.780739	0.481344	1.622	0.104804	NA
hsa-miR-6857-3p	3.35926	0.489332	0.549396	0.890672	0.373105	NA
hsa-miR-4637	1.66323	0.301409	0.724639	0.415944	0.677451	NA
hsa-miR-6784-5p	6.45344	0.0542351	0.469475	0.115523	0.908031	NA
hsa-miR-6817-5p	1.87069	0.664968	0.73898	0.899846	0.368202	NA
hsa-miR-122-5p	1.29621	-0.453903	0.729972	-0.621809	0.534067	NA
hsa-miR-205-3p	2.09936	0.410064	0.6956	0.589512	0.555518	NA
hsa-miR-568	1.03721	0.0040848	0.735655	0.00555261	0.99557	NA
hsa-miR-5088-3p	1.41598	0.336994	0.681789	0.494278	0.62111	NA
hsa-miR-4741	5.36777	0.940074	0.501562	1.87429	0.0608903	NA
hsa-miR-3976	1.27359	1.02714	0.768346	1.33682	0.181281	NA
hsa-miR-451b	0.376781	0.114649	0.761773	0.150503	0.880368	NA
hsa-miR-4517	2.31268	1.01606	0.625681	1.62393	0.104391	NA
hsa-miR-508-3p	0.872926	0.732424	0.777652	0.94184	0.346274	NA
hsa-miR-3942-5p	4.67426	0.30336	0.514151	0.59002	0.555177	NA
hsa-miR-6766-3p	1.49092	0.135892	0.684562	0.198509	0.842647	NA
hsa-miR-3974	0.419249	0.330182	0.760974	0.433894	0.664366	NA
hsa-miR-1250-3p	3.36858	0.611576	0.629508	0.971513	0.331293	NA
hsa-miR-6511b-5p	5.83671	0.448984	0.516898	0.868611	0.38506	NA
hsa-miR-3918	2.21826	-0.0546882	0.585734	-0.093367	0.925612	NA
hsa-miR-185-3p	0.265731	0.988147	0.717592	1.37703	0.168502	NA
hsa-miR-378e	4.06763	-0.640319	0.553295	-1.15728	0.247157	NA
hsa-miR-6867-5p	1.70249	-0.219323	0.675903	-0.324489	0.745568	NA
hsa-miR-6855-5p	2.95689	-0.763101	0.61392	-1.243	0.213869	NA
hsa-miR-1202	0.613815	-0.339953	0.76086	-0.446801	0.655018	NA
hsa-miR-3713	3.61345	0.837543	0.617674	1.35596	0.175111	NA
hsa-miR-3915	1.4194	0.634829	0.714259	0.888794	0.374114	NA
hsa-miR-3127-3p	4.75715	0.164182	0.574539	0.285762	0.77506	NA
hsa-miR-15a-3p	0.775309	-0.267582	0.75856	-0.35275	0.724276	NA
hsa-miR-4446-5p	0.988863	-0.024976	0.750359	-0.0332854	0.973447	NA
hsa-miR-559	0.412352	-0.0960318	0.756932	-0.12687	0.899043	NA
hsa-miR-4482-5p	2.69564	0.800404	0.714615	1.12005	0.262693	NA
hsa-miR-520f-5p	0.209481	0.938545	0.708902	1.32394	0.185522	NA
hsa-miR-6874-3p	0.73065	1.3629	0.766623	1.7778	0.0754364	NA
hsa-miR-6779-5p	2.06487	0.536698	0.702082	0.764437	0.444607	NA
hsa-miR-548ax	1.33008	0.741506	0.684152	1.08383	0.278439	NA
hsa-miR-5682	0.767426	1.37802	0.7794	1.76805	0.0770524	NA
hsa-miR-8072	3.83772	0.857612	0.536103	1.59971	0.109662	NA
hsa-miR-507	0.508844	0.422561	0.781163	0.540939	0.58855	NA
hsa-miR-3065-3p	6.73507	0.301388	0.483319	0.62358	0.532903	NA
hsa-miR-4708-5p	2.01059	-1.15368	0.608832	-1.89491	0.0581049	NA
hsa-miR-6762-5p	3.86822	0.257581	0.54531	0.472357	0.636672	NA
hsa-miR-6752-3p	3.04153	-1.22649	0.589259	-2.08141	0.0373966	NA
hsa-miR-506-3p	3.25797	-0.292397	0.622303	-0.469862	0.638454	NA
hsa-miR-4711-3p	2.82075	1.04804	0.705362	1.48582	0.137327	NA
hsa-miR-4659b-3p	1.89819	0.52067	0.674842	0.771543	0.440385	NA
hsa-miR-1305	3.76744	0.583714	0.664934	0.877852	0.380024	NA
hsa-miR-4655-5p	1.13383	-0.122112	0.758087	-0.161079	0.872031	NA
hsa-miR-631	1.65951	0.544922	0.659544	0.826211	0.408684	NA
hsa-miR-5010-5p	3.75462	0.851176	0.571435	1.48954	0.136345	NA
hsa-miR-6506-5p	1.25497	0.422108	0.742881	0.568204	0.569897	NA
hsa-miR-7158-5p	6.47368	-0.598553	0.696446	-0.859439	0.390098	NA
hsa-miR-129-1-3p	0.794071	-0.168239	0.761799	-0.220844	0.825214	NA
hsa-miR-5591-5p	0.857848	0.232245	0.762435	0.30461	0.760663	NA
hsa-miR-3191-3p	0.491874	0.791651	0.776202	1.0199	0.307774	NA
hsa-miR-6762-3p	3.34586	0.054679	0.548996	0.0995981	0.920663	NA
hsa-miR-8059	0.671264	1.02575	0.773859	1.3255	0.185007	NA
hsa-miR-4768-3p	2.95938	0.373731	0.654487	0.571029	0.56798	NA
hsa-miR-8052	0.326515	0.0473926	0.772444	0.0613541	0.951077	NA
hsa-miR-4305	0.29659	-0.0329172	0.719459	-0.0457527	0.963507	NA
hsa-miR-4697-5p	1.10608	0.507166	0.749506	0.676668	0.498617	NA
hsa-miR-7153-5p	6.70882	0.113492	0.442766	0.256325	0.7977	NA
hsa-miR-3189-5p	0.743235	0.341946	0.757055	0.451679	0.6515	NA
hsa-miR-6743-3p	1.37291	1.75083	0.711088	2.46218	0.0138096	NA
hsa-miR-373-3p	2.90027	-0.302542	0.667775	-0.45306	0.650506	NA
hsa-miR-6848-3p	5.79595	0.557031	0.492899	1.13011	0.258429	NA
hsa-miR-4427	0.394772	-0.286601	0.761931	-0.376151	0.706805	NA
hsa-miR-6070	3.54366	1.19716	0.660556	1.81235	0.0699324	NA
hsa-miR-4760-5p	4.51569	0.0422312	0.542181	0.0778914	0.937914	NA
hsa-miR-652-5p	5.0207	0.527749	0.506074	1.04283	0.297027	NA
hsa-miR-3677-5p	0.74493	0.372848	0.756388	0.492932	0.622061	NA
hsa-miR-4709-3p	1.80214	-1.22686	0.694179	-1.76735	0.0771691	NA
hsa-miR-7702	1.69472	-0.552631	0.668748	-0.826366	0.408597	NA
hsa-miR-6823-5p	3.0082	-0.193718	0.6155	-0.314733	0.752964	NA
hsa-miR-16-1-3p	6.97184	0.242408	0.46777	0.518221	0.604304	NA
hsa-miR-1203	1.73838	-0.0640416	0.649141	-0.098656	0.921411	NA
hsa-miR-762	6.95098	0.13039	0.458151	0.2846	0.775951	NA
hsa-miR-205-5p	2.73869	0.828855	0.759412	1.09144	0.275078	NA
hsa-miR-6887-5p	7.09275	1.38846	0.567161	2.44809	0.0143616	NA
hsa-miR-7160-3p	3.1438	0.61695	0.634898	0.971731	0.331184	NA
hsa-miR-4633-3p	2.30707	-0.735953	0.690375	-1.06602	0.286415	NA
hsa-miR-5004-5p	4.35069	1.3911	0.596986	2.3302	0.0197955	NA
hsa-miR-6843-3p	0.707269	0.297151	0.763237	0.389329	0.697032	NA
hsa-miR-623	0	NA	NA	NA	NA	NA
hsa-miR-6868-3p	7.89133	0.584995	0.461972	1.2663	0.205405	NA
hsa-miR-6830-5p	6.6937	0.535097	0.627525	0.852711	0.39382	NA
hsa-miR-4725-5p	2.0254	1.27607	0.70357	1.81371	0.0697217	NA
hsa-miR-4744	0.719538	0.657505	0.759494	0.865714	0.386647	NA
hsa-miR-1253	0.75139	0.396441	0.758344	0.522773	0.601132	NA
hsa-miR-4453	1.65339	0.424353	0.763202	0.556016	0.5782	NA
hsa-miR-302e	0.297684	0.0775365	0.729508	0.106286	0.915355	NA
hsa-miR-4256	4.8099	-0.701414	0.535511	-1.3098	0.190262	NA
hsa-miR-676-3p	0.576894	0.00983826	0.768891	0.0127954	0.989791	NA
hsa-miR-7150	4.22563	0.279808	0.654644	0.427421	0.669073	NA
hsa-miR-6786-5p	2.16986	0.335349	0.70038	0.47881	0.632074	NA
hsa-miR-920	0.944352	0.707763	0.749294	0.944573	0.344877	NA
hsa-miR-1264	2.77797	0.547032	0.600046	0.91165	0.361953	NA
hsa-miR-4653-3p	1.97254	1.64405	0.740751	2.21944	0.026457	NA
hsa-miR-1273h-3p	7.96277	0.459944	0.528474	0.870324	0.384123	NA
hsa-miR-4790-3p	0.368642	0.48896	0.753282	0.649106	0.51627	NA
hsa-miR-513c-5p	0.351898	0.635727	0.764363	0.831709	0.405573	NA
hsa-miR-6878-5p	0.849483	-0.145646	0.757843	-0.192186	0.847597	NA
hsa-miR-6759-5p	2.9413	0.205575	0.737953	0.278575	0.780571	NA
hsa-miR-4536-5p	0.469304	-0.375945	0.778194	-0.483099	0.629025	NA
hsa-miR-130a-5p	0.38103	0.107156	0.776646	0.137973	0.890262	NA
hsa-miR-6512-5p	6.02893	-0.262759	0.569929	-0.461039	0.644771	NA
hsa-miR-4258	7.47828	0.947424	0.469581	2.01759	0.0436336	NA
hsa-miR-562	3.84598	-0.0813667	0.685976	-0.118614	0.905581	NA
hsa-miR-133a-5p	0.0377803	-0.249072	0.561606	-0.4435	0.657404	NA
hsa-miR-3156-3p	4.25282	0.524154	0.579691	0.904195	0.365892	NA
hsa-miR-1231	1.53908	-0.22269	0.672238	-0.331267	0.740443	NA
hsa-miR-4692	0.87931	0.722605	0.757388	0.954075	0.340046	NA
hsa-miR-504-3p	1.86499	-0.195456	0.713725	-0.273854	0.784197	NA
hsa-miR-10a-3p	4.31532	-0.202789	0.506948	-0.40002	0.689142	NA
hsa-miR-4468	6.45566	0.153303	0.620905	0.246903	0.804983	NA
hsa-miR-3165	3.32851	0.346005	0.53633	0.645135	0.51884	NA
hsa-miR-3606-3p	1.55419	1.0592	0.671272	1.5779	0.114588	NA
hsa-miR-4719	3.25459	-0.0245335	0.764479	-0.0320918	0.974399	NA
hsa-miR-4526	0.40657	-1.02529	0.777447	-1.31879	0.18724	NA
hsa-miR-877-3p	3.17679	-0.383368	0.583722	-0.656766	0.511332	NA
hsa-miR-4274	2.41966	0.159476	0.697489	0.228643	0.819147	NA
hsa-miR-548g-5p	0.819309	1.18546	0.755215	1.56969	0.116486	NA
hsa-miR-635	3.59386	1.39219	0.704409	1.9764	0.0481094	NA
hsa-miR-6127	5.05133	0.502969	0.611957	0.821902	0.411132	NA
hsa-miR-5197-5p	3.27827	0.302298	0.599357	0.504369	0.614002	NA
hsa-miR-6730-5p	3.59743	0.752513	0.69642	1.08054	0.2799	NA
hsa-miR-4761-3p	4.31874	-0.874871	0.597829	-1.46341	0.143354	NA
hsa-miR-6800-3p	1.32573	0.629563	0.762596	0.825553	0.409058	NA
hsa-miR-579-3p	1.20734	0.727	0.69453	1.04675	0.295214	NA
hsa-miR-3145-3p	3.56556	0.550086	0.566527	0.970979	0.331559	NA
hsa-miR-593-3p	1.45942	0.56041	0.694875	0.80649	0.419961	NA
hsa-miR-374c-5p	0.490661	0.877851	0.780796	1.1243	0.260885	NA
hsa-miR-3064-3p	1.06825	0.855152	0.738715	1.15762	0.247019	NA
hsa-miR-4733-3p	1.65304	0.592183	0.716724	0.826236	0.40867	NA
hsa-miR-1250-5p	2.41098	0.106999	0.61571	0.173782	0.862037	NA
hsa-miR-632	1.86051	-0.460586	0.71334	-0.645675	0.51849	NA
hsa-miR-6773-5p	3.49065	1.12632	0.626399	1.79808	0.0721642	NA
hsa-miR-142-3p	0.32523	0.504091	0.722238	0.697957	0.485204	NA
hsa-miR-302b-5p	1.33502	1.25551	0.699516	1.79483	0.0726809	NA
hsa-miR-3200-5p	3.63477	-0.894278	0.558264	-1.60189	0.10918	NA
hsa-miR-490-5p	2.4727	0.0679048	0.730694	0.0929319	0.925958	NA
hsa-miR-18b-5p	0.911251	1.11939	0.755656	1.48134	0.138515	NA
hsa-miR-3689d	0.216497	0.861396	0.689209	1.24983	0.211361	NA
hsa-miR-216a-3p	1.09984	-0.0155308	0.759508	-0.0204485	0.983686	NA
hsa-miR-653-5p	1.23482	0.0370232	0.730632	0.0506728	0.959586	NA
hsa-miR-4657	1.04284	0.815318	0.727509	1.1207	0.262417	NA
hsa-miR-570-5p	1.17004	0.503324	0.727973	0.691405	0.489311	NA
hsa-miR-338-3p	4.91123	-1.035	0.552253	-1.87414	0.0609113	NA
hsa-miR-138-1-3p	1.01972	-1.05584	0.730379	-1.4456	0.148288	NA
hsa-miR-381-5p	6.44415	0.234215	0.48571	0.482212	0.629656	NA
hsa-miR-1322	1.0867	0.638387	0.730449	0.873965	0.382138	NA
hsa-miR-128-2-5p	0.282963	1.09577	0.727743	1.5057	0.132143	NA
hsa-miR-6783-5p	4.15671	0.50461	0.545729	0.924653	0.355146	NA
hsa-miR-8063	1.73854	0.422406	0.692604	0.609881	0.541941	NA
hsa-miR-4699-3p	0.663282	0.547131	0.768501	0.711946	0.476499	NA
hsa-miR-6882-3p	3.23233	0.766059	0.652139	1.17469	0.24012	NA
hsa-miR-487b-5p	3.33682	-0.148226	0.592773	-0.250056	0.802544	NA
hsa-miR-548s	6.45753	-0.211848	0.487033	-0.434976	0.66358	NA
hsa-miR-3689a-3p	0.432808	-0.11483	0.755585	-0.151975	0.879207	NA
hsa-miR-2053	4.08103	1.10621	0.680635	1.62526	0.104106	NA
hsa-miR-449c-5p	0.468426	-0.130613	0.777889	-0.167907	0.866656	NA
hsa-miR-3940-5p	0.645034	0.476889	0.758509	0.628718	0.529534	NA
hsa-miR-7853-5p	1.24777	-0.307412	0.718779	-0.427686	0.66888	NA
hsa-miR-24-1-5p	7.09624	0.205045	0.558001	0.367464	0.713273	NA
hsa-miR-3692-5p	1.13544	0.92159	0.738551	1.24784	0.212091	NA
hsa-miR-7162-5p	7.28607	-0.118931	0.539786	-0.22033	0.825614	NA
hsa-miR-135b-3p	1.76182	1.2832	0.740133	1.73374	0.0829635	NA
hsa-miR-3688-3p	4.14378	0.487492	0.507043	0.961441	0.33633	NA
hsa-miR-4509	1.4494	0.391091	0.713014	0.548504	0.583346	NA
hsa-miR-4318	1.59647	-0.136367	0.652235	-0.209077	0.834388	NA
hsa-miR-548ae-3p	0.697917	0.756666	0.775117	0.976196	0.328967	NA
hsa-miR-4640-5p	4.45061	0.750807	0.61467	1.22148	0.221904	NA
hsa-miR-4670-3p	2.653	0.274352	0.757154	0.362346	0.717093	NA
hsa-miR-1183	0.712223	-1.02852	0.772211	-1.33192	0.182887	NA
hsa-miR-6816-3p	2.06215	0.528976	0.645707	0.81922	0.412661	NA
hsa-miR-548g-3p	0.108436	-0.072164	0.580168	-0.124385	0.901011	NA
hsa-miR-1287-3p	2.28692	0.136791	0.616446	0.221903	0.824389	NA
hsa-miR-548v	1.43924	0.803557	0.697994	1.15124	0.249634	NA
hsa-miR-4330	1.23957	-0.24644	0.730841	-0.337201	0.735966	NA
hsa-miR-518b	0.639837	1.18613	0.779263	1.52212	0.127978	NA
hsa-miR-554	2.55424	0.429239	0.735846	0.583328	0.559673	NA
hsa-miR-144-5p	1.80406	-0.628427	0.623567	-1.00779	0.313553	NA
hsa-miR-3922-3p	2.08766	0.458171	0.675532	0.678238	0.497621	NA
hsa-miR-3150a-3p	0.822395	-0.732072	0.756767	-0.967368	0.33336	NA
hsa-miR-3191-5p	3.22431	0.591337	0.583618	1.01323	0.310952	NA
hsa-miR-6088	3.00334	1.67683	0.651198	2.575	0.0100241	NA
hsa-miR-939-5p	3.73373	-0.380063	0.57343	-0.662788	0.507466	NA
hsa-miR-541-3p	3.74197	-0.636117	0.608244	-1.04583	0.295642	NA
hsa-miR-4795-3p	0.204129	0.471776	0.716754	0.658211	0.510402	NA
hsa-miR-4752	1.86126	0.364686	0.660072	0.552494	0.58061	NA
hsa-miR-4680-3p	0.595091	0.072509	0.775165	0.0935401	0.925474	NA
hsa-miR-4783-3p	2.45477	0.0223674	0.620047	0.0360737	0.971224	NA
hsa-miR-1262	5.42857	0.188029	0.459667	0.409055	0.6825	NA
hsa-miR-591	0.649506	1.05487	0.778284	1.35538	0.175295	NA
hsa-miR-3591-5p	2.44109	0.670162	0.664931	1.00787	0.313518	NA
hsa-miR-4650-3p	1.41025	0.305005	0.699479	0.436046	0.662803	NA
hsa-miR-6747-5p	4.04158	0.291123	0.604145	0.481876	0.629894	NA
hsa-miR-4524b-3p	7.05106	-0.240422	0.483214	-0.497548	0.618803	NA
hsa-miR-4687-5p	7.51233	0.619758	0.441821	1.40274	0.160695	NA
hsa-miR-1207-5p	0.720822	0.346205	0.773916	0.447342	0.654628	NA
hsa-miR-659-3p	3.06346	1.04153	0.677534	1.53724	0.124235	NA
hsa-miR-526a	0.150253	0.624425	0.638135	0.978515	0.32782	NA
hsa-miR-1915-5p	1.25174	0.130594	0.758376	0.172202	0.863279	NA
hsa-miR-548b-5p	0.487637	0.00793819	0.77839	0.0101982	0.991863	NA
hsa-miR-4776-3p	0.88765	0.727565	0.763174	0.953341	0.340417	NA
hsa-miR-642b-3p	6.45247	-0.521809	0.475753	-1.09681	0.272725	NA
hsa-miR-4255	7.44782	0.136819	0.557927	0.245228	0.80628	NA
hsa-miR-3198	0.986945	0.52028	0.731902	0.71086	0.477171	NA
hsa-miR-5687	0.450691	-0.584683	0.769197	-0.760121	0.447182	NA
hsa-miR-4758-5p	0.339439	0.29988	0.762755	0.393154	0.694206	NA
hsa-miR-651-5p	1.96998	-0.726448	0.654759	-1.10949	0.267219	NA
hsa-miR-6776-3p	6.48518	0.564481	0.520662	1.08416	0.278293	NA
hsa-miR-6732-3p	2.29397	-0.117796	0.594384	-0.198182	0.842903	NA
hsa-miR-8074	6.31365	-0.179259	0.479697	-0.373691	0.708634	NA
hsa-miR-3675-3p	3.46109	0.433305	0.575277	0.753211	0.451323	NA
hsa-miR-5586-5p	0.881751	0.797544	0.755388	1.05581	0.291056	NA
hsa-miR-223-5p	1.13869	-0.743853	0.700123	-1.06246	0.288027	NA
hsa-miR-206	0.0444942	0.275252	0.560318	0.491242	0.623255	NA
hsa-miR-1468-3p	1.8168	0.535509	0.658833	0.812815	0.416324	NA
hsa-miR-668-5p	1.61892	1.33736	0.712882	1.87599	0.0606571	NA
hsa-miR-5004-3p	2.02858	0.910227	0.62612	1.45376	0.146013	NA
hsa-miR-4712-5p	1.67801	0.287836	0.676279	0.425618	0.670386	NA
hsa-miR-5583-3p	1.37675	0.436802	0.708396	0.616607	0.537494	NA
hsa-miR-3122	1.04366	0.502261	0.725822	0.691989	0.488944	NA
hsa-miR-4263	3.86014	-0.0499053	0.632152	-0.078945	0.937076	NA
hsa-miR-4312	1.74417	-0.625863	0.701456	-0.892234	0.372267	NA
hsa-miR-1178-3p	0.562795	0.340685	0.77515	0.439508	0.660294	NA
hsa-miR-204-3p	1.4699	0.0985447	0.737966	0.133536	0.89377	NA
hsa-miR-4471	3.35121	1.10076	0.692227	1.59017	0.111795	NA
hsa-miR-6884-5p	0.414316	0.0573707	0.77839	0.0737044	0.941246	NA
hsa-miR-6851-5p	3.58775	0.444939	0.535455	0.830955	0.405999	NA
hsa-miR-516b-5p	4.52568	1.28956	0.599262	2.15191	0.0314046	NA
hsa-miR-3179	2.44399	0.387896	0.580061	0.668716	0.503677	NA
hsa-miR-3689b-3p	0.341344	1.37675	0.756877	1.81899	0.0689134	NA
hsa-miR-548al	6.6352	-0.202951	0.474715	-0.427522	0.669	NA
hsa-miR-6795-3p	2.4645	0.28429	0.656188	0.433245	0.664837	NA
hsa-miR-492	0.103086	0.0168088	0.594794	0.0282599	0.977455	NA
hsa-miR-6865-5p	0.198814	-1.13801	0.721116	-1.57812	0.114538	NA
hsa-miR-6832-5p	1.81107	0.0289136	0.696798	0.041495	0.966901	NA
hsa-miR-548bb-5p	2.46435	1.22728	0.651724	1.88313	0.0596834	NA
hsa-miR-4660	0.536012	0.681584	0.778891	0.875069	0.381536	NA
hsa-miR-4804-3p	1.30409	-0.0180062	0.749372	-0.0240283	0.98083	NA
hsa-miR-6757-3p	3.34289	0.778499	0.596401	1.30533	0.191781	NA
hsa-miR-6869-5p	4.52041	1.25235	0.585905	2.13746	0.0325607	NA
hsa-miR-4755-5p	1.17936	-0.190738	0.701674	-0.271832	0.785751	NA
hsa-miR-3137	2.13443	-0.300441	0.711318	-0.422372	0.672753	NA
hsa-miR-3652	1.45694	0.882997	0.686459	1.28631	0.198336	NA
hsa-miR-8070	4.12943	0.386672	0.529726	0.729947	0.465422	NA
hsa-miR-6764-3p	5.02971	0.699181	0.575515	1.21488	0.224412	NA
hsa-miR-4766-3p	1.43819	-0.82645	0.72097	-1.1463	0.25167	NA
hsa-miR-1247-5p	7.35932	0.0754079	0.678228	0.111184	0.911471	NA
hsa-miR-5001-3p	6.88481	-0.0970624	0.470723	-0.206199	0.836636	NA
hsa-miR-4740-5p	3.87231	0.379116	0.543696	0.697294	0.485619	NA
hsa-miR-3190-5p	1.63565	1.50835	0.699591	2.15604	0.0310804	NA
hsa-miR-4664-3p	4.55256	1.06499	0.487674	2.18381	0.0289763	NA
hsa-miR-6076	0.152999	-0.915309	0.69133	-1.32398	0.185509	NA
hsa-miR-6765-5p	3.95676	1.03217	0.625519	1.6501	0.0989229	NA
hsa-miR-139-3p	0.141762	0.527125	0.614798	0.857395	0.391226	NA
hsa-miR-544a	0.58208	-0.749257	0.779039	-0.961771	0.336165	NA
hsa-miR-3691-5p	6.79327	0.0596313	0.455954	0.130784	0.895947	NA
hsa-miR-581	1.54968	-0.427434	0.696015	-0.614116	0.539139	NA
hsa-miR-511-5p	1.02684	-0.0408508	0.746483	-0.0547243	0.956358	NA
hsa-miR-4676-3p	1.93795	0.212706	0.628535	0.338416	0.73505	NA
hsa-miR-4296	0.841569	0.676466	0.755892	0.894924	0.370828	NA
hsa-miR-3666	0.865935	0.421296	0.745464	0.565145	0.571975	NA
hsa-miR-3134	1.33563	-0.101	0.684037	-0.147653	0.882617	NA
hsa-miR-548ba	1.30867	0.271378	0.740778	0.366342	0.71411	NA
hsa-miR-619-3p	0.611153	0.610481	0.772662	0.7901	0.429469	NA
hsa-miR-378j	3.91682	0.370972	0.512059	0.724471	0.468777	NA
hsa-miR-1-3p	0.144896	0.0713415	0.607221	0.117489	0.906473	NA
hsa-miR-6756-3p	7.81107	1.63543	0.63452	2.57743	0.00995387	NA
hsa-miR-7111-3p	2.74843	0.364915	0.588521	0.620054	0.535222	NA
hsa-miR-597-5p	1.14858	0.464988	0.714325	0.650948	0.51508	NA
hsa-miR-8085	1.86277	-0.25382	0.737561	-0.344135	0.730745	NA
hsa-miR-548d-5p	6.22285	-0.0258592	0.434974	-0.0594501	0.952594	NA
hsa-miR-5187-5p	0.602846	1.20448	0.778095	1.54799	0.121624	NA
hsa-miR-4298	2.06471	0.139085	0.674787	0.206117	0.836699	NA
hsa-miR-6739-3p	4.16072	0.372616	0.550338	0.677067	0.498363	NA
hsa-miR-488-3p	2.20886	-0.443139	0.685376	-0.646563	0.517915	NA
hsa-miR-1256	1.69955	1.90068	0.741793	2.56228	0.0103987	NA
hsa-miR-2054	5.31712	0.49374	0.509032	0.969957	0.332068	NA
hsa-miR-4425	1.26391	0.248588	0.710514	0.34987	0.726436	NA
hsa-miR-7151-5p	2.13983	0.406506	0.625788	0.649591	0.515956	NA
hsa-miR-372-5p	0.345472	-0.122137	0.765225	-0.159609	0.873189	NA
hsa-miR-367-5p	0.216974	0.534499	0.740596	0.721715	0.470469	NA
hsa-miR-7515	0.990664	0.0216515	0.727843	0.0297475	0.976268	NA
hsa-miR-6790-5p	0.0444942	0.275252	0.560318	0.491242	0.623255	NA
hsa-miR-1277-3p	0.456981	0.391153	0.776638	0.503648	0.614508	NA
hsa-miR-6825-3p	7.88763	0.970229	0.551147	1.76038	0.078343	NA
hsa-miR-3194-3p	0.633988	0.102043	0.770241	0.132482	0.894603	NA
hsa-miR-6829-5p	2.63485	1.27492	0.658497	1.93611	0.0528541	NA
hsa-miR-211-3p	1.00678	0.722591	0.736408	0.981238	0.326475	NA
hsa-miR-655-5p	4.6539	-0.268611	0.480043	-0.559557	0.575782	NA
hsa-miR-4766-5p	0.334047	-0.0365449	0.763081	-0.0478913	0.961803	NA
hsa-miR-5580-5p	0.32344	0.79956	0.767457	1.04183	0.29749	NA
hsa-miR-6822-3p	0.738303	0.408643	0.762876	0.53566	0.592193	NA
hsa-miR-6824-5p	1.40993	1.02429	0.681361	1.5033	0.132761	NA
hsa-let-7f-1-3p	0.798444	0.191096	0.750126	0.254751	0.798915	NA
hsa-miR-577	3.58066	0.927328	0.597512	1.55198	0.120667	NA
hsa-miR-6129	2.51822	0.341211	0.603375	0.565504	0.571731	NA
hsa-miR-3148	0.799438	0.504221	0.770927	0.654045	0.513083	NA
hsa-miR-769-3p	4.57456	-0.16743	0.467399	-0.358216	0.720182	NA
hsa-miR-5006-5p	2.43812	0.206157	0.697589	0.295527	0.767591	NA
hsa-miR-6821-5p	2.42074	-0.0702666	0.681899	-0.103046	0.917927	NA
hsa-miR-6840-3p	1.42726	0.539166	0.708467	0.761032	0.446638	NA
hsa-miR-6888-5p	0.856625	0.518153	0.769265	0.673569	0.500585	NA
hsa-miR-6773-3p	1.95099	0.774679	0.653645	1.18517	0.235952	NA
hsa-miR-33b-3p	1.22718	0.250193	0.713918	0.35045	0.726001	NA
hsa-miR-600	2.63582	0.74988	0.639382	1.17282	0.240868	NA
hsa-miR-3202	0.643218	0.00031571	0.763956	0.000413257	0.99967	NA
hsa-miR-4640-3p	4.41551	-0.0331596	0.624902	-0.0530637	0.957681	NA
hsa-miR-4767	5.89545	-0.299684	0.472067	-0.634833	0.525537	NA
hsa-miR-551a	0.532977	-0.34689	0.777074	-0.446406	0.655304	NA
hsa-miR-371a-5p	1.99216	0.744544	0.66637	1.11731	0.263861	NA
hsa-miR-3124-3p	1.69397	1.15031	0.658031	1.74811	0.0804453	NA
hsa-miR-7846-3p	6.33292	-0.328226	0.553068	-0.593465	0.55287	NA
hsa-miR-4659b-5p	1.60237	0.666021	0.667711	0.997469	0.318537	NA
hsa-miR-1273g-5p	3.7604	1.34476	0.600967	2.23767	0.0252429	NA
hsa-miR-7107-5p	3.89032	-0.161893	0.664951	-0.243466	0.807644	NA
hsa-miR-6728-5p	1.27539	0.568191	0.729327	0.779062	0.435943	NA
hsa-miR-6769b-3p	8.00244	-0.841802	0.481657	-1.74772	0.0805125	NA
hsa-miR-6761-5p	1.77113	-0.195123	0.719398	-0.27123	0.786214	NA
hsa-miR-5090	7.77792	0.22566	0.451244	0.500084	0.617016	NA
hsa-miR-4700-3p	2.7841	0.620888	0.698277	0.889173	0.37391	NA
hsa-miR-4772-5p	6.44853	0.667271	0.441034	1.51297	0.130287	NA
hsa-miR-6719-3p	6.81866	0.566567	0.560328	1.01113	0.311953	NA
hsa-miR-1224-3p	3.34571	0.897099	0.613224	1.46292	0.143489	NA
hsa-miR-3663-3p	0.466783	0.335141	0.780549	0.429365	0.667657	NA
hsa-miR-4754	1.69657	0.929749	0.722319	1.28717	0.198035	NA
hsa-miR-6085	3.57253	-0.28642	0.652078	-0.439241	0.660487	NA
hsa-miR-6750-5p	1.31554	0.621578	0.677433	0.917548	0.358855	NA
hsa-miR-520a-5p	7.69205	0.0201955	0.631884	0.0319608	0.974503	NA
hsa-miR-4796-3p	1.01875	-0.219301	0.744698	-0.294483	0.768389	NA
hsa-miR-3977	3.05371	0.946412	0.585354	1.61682	0.105917	NA
hsa-miR-3680-3p	0.425401	0.10198	0.775181	0.131556	0.895336	NA
hsa-miR-4729	0.434237	1.17565	0.747128	1.57355	0.11559	NA
hsa-miR-4502	1.75301	0.278854	0.682953	0.408307	0.683048	NA
hsa-miR-4638-5p	1.12184	-0.148833	0.738444	-0.20155	0.840269	NA
hsa-miR-6875-3p	3.31411	0.603569	0.683887	0.882556	0.377476	NA
hsa-miR-198	0.408494	0.632455	0.770677	0.820649	0.411846	NA
hsa-miR-4753-5p	2.37087	0.252443	0.686012	0.367986	0.712884	NA
hsa-miR-4431	6.95182	1.19144	0.518732	2.29683	0.0216282	NA
hsa-miR-6814-5p	1.43282	-0.355497	0.732903	-0.485054	0.627638	NA
hsa-miR-3619-3p	2.14559	0.895159	0.617192	1.45037	0.146954	NA
hsa-miR-7844-5p	0.187195	-0.763764	0.650414	-1.17427	0.240285	NA
hsa-miR-612	2.73486	0.576013	0.705591	0.816356	0.414297	NA
hsa-miR-1910-3p	4.63301	0.700632	0.606423	1.15535	0.247946	NA
hsa-miR-3686	1.43739	-0.15402	0.738378	-0.208592	0.834767	NA
hsa-miR-6818-3p	2.62656	0.78951	0.585237	1.34904	0.177323	NA
hsa-miR-135a-5p	0.536632	0.437213	0.773369	0.565336	0.571845	NA
hsa-miR-509-5p	0.360291	0.298483	0.761389	0.392024	0.695041	NA
hsa-miR-508-5p	0	NA	NA	NA	NA	NA
hsa-miR-6835-3p	1.42238	0.290153	0.673919	0.430546	0.666799	NA
hsa-miR-4795-5p	5.66407	0.435759	0.458443	0.950519	0.341848	NA
hsa-miR-1295b-5p	2.12315	-0.342042	0.635136	-0.538533	0.590209	NA
hsa-miR-1229-3p	3.44736	-0.135068	0.532914	-0.253451	0.79992	NA
hsa-miR-6865-3p	2.51518	0.790205	0.6807	1.16087	0.245695	NA
hsa-miR-4708-3p	3.99424	1.03893	0.651952	1.59356	0.111034	NA
hsa-miR-3529-5p	1.93394	-0.570727	0.610406	-0.934996	0.34979	NA
hsa-miR-4474-5p	1.89051	0.694535	0.676417	1.02679	0.304522	NA
hsa-miR-891b	6.59194	-0.431607	0.496742	-0.868875	0.384915	NA
hsa-miR-5681a	0.0670359	0.294353	0.560704	0.524971	0.599604	NA
hsa-miR-544b	3.10488	0.503201	0.645113	0.780021	0.435379	NA
hsa-miR-524-5p	0.378592	0.285264	0.780133	0.365661	0.714618	NA
hsa-miR-4321	2.99218	0.101669	0.574712	0.176904	0.859584	NA
hsa-miR-6759-3p	2.23928	0.372404	0.629803	0.591303	0.554317	NA
hsa-miR-675-5p	1.63486	0.88315	0.688922	1.28193	0.199867	NA
hsa-miR-5088-5p	2.66673	0.699677	0.661599	1.05756	0.290258	NA
hsa-miR-3671	2.2536	-0.47242	0.707877	-0.667376	0.504532	NA
hsa-miR-3197	7.05324	0.252057	0.495996	0.508183	0.611325	NA
hsa-miR-203a-5p	0	NA	NA	NA	NA	NA
hsa-miR-208a-3p	0.0444942	0.275252	0.560318	0.491242	0.623255	NA
hsa-miR-5696	5.25341	0.193245	0.488941	0.395232	0.692672	NA
hsa-miR-6508-5p	1.09821	0.92951	0.752081	1.23592	0.216489	NA
hsa-miR-3678-5p	7.23579	1.21111	0.48919	2.47575	0.0132958	NA
hsa-miR-548aq-3p	3.22479	0.420852	0.539127	0.780619	0.435027	NA
hsa-miR-6797-5p	3.94445	0.802555	0.65055	1.23366	0.217331	NA
hsa-miR-6717-5p	2.27146	-0.134184	0.628358	-0.213548	0.8309	NA
hsa-miR-6854-3p	4.40084	1.14346	0.573083	1.99528	0.0460122	NA
hsa-miR-6788-3p	5.04169	0.188619	0.65285	0.288916	0.772646	NA
hsa-miR-6833-5p	0.496529	0.478275	0.774537	0.617498	0.536906	NA
hsa-miR-6801-3p	2.00909	1.21746	0.664984	1.83081	0.0671282	NA
hsa-miR-6881-5p	4.45186	0.6269	0.617912	1.01455	0.310323	NA
hsa-miR-3714	1.20164	1.02809	0.71332	1.44127	0.149508	NA
hsa-miR-1236-3p	2.58581	1.35112	0.675247	2.00092	0.0454008	NA
hsa-miR-520f-3p	0.690557	-0.285613	0.755381	-0.378105	0.705353	NA
hsa-miR-4798-3p	1.85459	0.654966	0.764537	0.856683	0.39162	NA
hsa-miR-4539	0.605373	0.164707	0.760714	0.216517	0.828585	NA
hsa-miR-4740-3p	2.60993	1.09394	0.649485	1.68432	0.0921195	NA
hsa-miR-6715b-3p	5.99677	0.992904	0.60642	1.63732	0.101564	NA
hsa-miR-6851-3p	1.47698	0.35129	0.668206	0.52572	0.599083	NA
hsa-miR-558	1.51513	-0.710383	0.705392	-1.00707	0.313899	NA
hsa-miR-4693-5p	1.26197	0.546866	0.686988	0.796033	0.426013	NA
hsa-miR-3934-3p	2.12021	-0.029906	0.670565	-0.0445982	0.964428	NA
hsa-miR-3614-3p	2.44543	0.113179	0.639318	0.177031	0.859484	NA
hsa-miR-4723-3p	1.00137	0.714785	0.716741	0.99727	0.318633	NA
hsa-miR-6847-3p	0.44393	0.749668	0.775415	0.966795	0.333646	NA
hsa-miR-4800-5p	2.83122	0.104978	0.618149	0.169827	0.865146	NA
hsa-miR-196b-3p	6.24375	0.809051	0.484919	1.66843	0.0952312	NA
hsa-miR-4436b-3p	0.750575	1.09069	0.772777	1.41139	0.15813	NA
hsa-miR-8064	0.790193	0.322489	0.763294	0.422496	0.672663	NA
hsa-miR-8078	3.86955	1.08034	0.666679	1.62049	0.105128	NA
hsa-miR-566	1.41768	1.1163	0.677968	1.64654	0.0996523	NA
hsa-miR-6515-3p	3.85016	0.140765	0.561699	0.250606	0.802118	NA
hsa-miR-556-3p	4.07547	0.388545	0.558206	0.69606	0.486392	NA
hsa-miR-891a-5p	1.30902	-0.132768	0.734721	-0.180705	0.856599	NA
hsa-miR-573	1.73609	-0.545503	0.69291	-0.787263	0.431128	NA
hsa-miR-4684-3p	1.05281	-0.325477	0.734662	-0.443029	0.657745	NA
hsa-miR-1306-3p	7.21658	-0.62775	0.431156	-1.45597	0.145401	NA
hsa-miR-6838-5p	2.06773	0.0193173	0.642986	0.030043	0.976033	NA
hsa-miR-8058	7.12058	1.316	0.77308	1.70229	0.0887016	NA
hsa-miR-154-3p	3.88413	1.00829	0.561649	1.79522	0.0726179	NA
hsa-miR-518c-5p	1.17531	0.482172	0.721734	0.668075	0.504086	NA
hsa-miR-5580-3p	0.453683	0.473163	0.778323	0.607927	0.543236	NA
hsa-miR-522-3p	0.954228	2.13776	0.763306	2.80066	0.00509986	NA
hsa-miR-645	2.72504	0.907974	0.624815	1.45319	0.146171	NA
hsa-miR-4481	2.18265	1.10649	0.669514	1.65267	0.0983979	NA
hsa-miR-3192-3p	5.60225	0.906168	0.578576	1.5662	0.117301	NA
hsa-miR-7-2-3p	1.71078	-0.133789	0.714681	-0.187201	0.851503	NA
hsa-miR-1200	5.1267	0.389765	0.51648	0.754657	0.450455	NA
hsa-miR-3923	0.232405	0.321645	0.718674	0.447553	0.654476	NA
hsa-miR-5002-3p	1.73141	0.345505	0.690358	0.500473	0.616742	NA
hsa-miR-4529-3p	0.475024	0.814855	0.775825	1.05031	0.293577	NA
hsa-miR-4789-5p	1.88436	0.31745	0.689576	0.460356	0.645261	NA
hsa-miR-3126-3p	0.955818	-0.469604	0.739312	-0.635191	0.525304	NA
hsa-miR-4652-3p	5.2142	0.314625	0.510323	0.61652	0.537551	NA
hsa-miR-518a-5p	0.386049	0.960986	0.763209	1.25914	0.20798	NA
hsa-miR-3143	0.365492	0.747446	0.760666	0.98262	0.325794	NA
hsa-miR-4673	7.23864	-0.120524	0.47976	-0.251218	0.801645	NA
hsa-miR-5187-3p	1.14561	0.403946	0.745173	0.542083	0.587761	NA
hsa-miR-5692b	0.325897	-0.191215	0.680534	-0.280978	0.778727	NA
hsa-miR-1288-5p	1.46212	-0.382386	0.723884	-0.528242	0.597331	NA
hsa-miR-1909-5p	3.44018	0.336763	0.613419	0.548993	0.58301	NA
hsa-miR-6877-3p	5.67808	0.421535	0.567772	0.742437	0.457823	NA
hsa-miR-4265	1.23189	0.584828	0.728074	0.803253	0.421828	NA
hsa-miR-551b-5p	0.242836	0.551587	0.61422	0.898028	0.369171	NA
hsa-miR-4452	2.08012	-0.310511	0.679652	-0.456867	0.647766	NA
hsa-miR-8066	1.29293	-0.1681	0.707743	-0.237516	0.812256	NA
hsa-miR-761	6.69611	0.604655	0.519634	1.16362	0.24458	NA
hsa-miR-6791-3p	3.9437	0.0661008	0.498758	0.132531	0.894564	NA
hsa-miR-6841-5p	1.72831	0.720153	0.694762	1.03655	0.299947	NA
hsa-miR-4679	0.873499	-0.556715	0.751547	-0.740758	0.45884	NA
hsa-miR-6503-3p	4.57682	0.765225	0.522811	1.46367	0.143284	NA
hsa-miR-6890-5p	2.11302	-0.209953	0.733369	-0.286286	0.774659	NA
hsa-miR-4731-3p	3.01923	0.255801	0.540394	0.47336	0.635956	NA
hsa-miR-6746-5p	3.70051	0.204486	0.592114	0.34535	0.729832	NA
hsa-miR-519e-5p	1.089	-0.280712	0.755965	-0.37133	0.710392	NA
hsa-miR-6782-5p	4.81286	0.0897671	0.580136	0.154735	0.877031	NA
hsa-miR-6510-5p	2.30943	-0.254834	0.727604	-0.350237	0.726161	NA
hsa-miR-4280	0.705036	1.21026	0.775065	1.56149	0.118407	NA
hsa-miR-5008-3p	1.29803	0.61357	0.724879	0.846444	0.397305	NA
hsa-miR-378a-5p	7.35149	-0.890879	0.674653	-1.3205	0.186668	NA
hsa-miR-6893-5p	1.00879	-0.265751	0.718549	-0.369844	0.711499	NA
hsa-miR-6734-5p	3.91116	-0.139408	0.564869	-0.246797	0.805065	NA
hsa-miR-7851-3p	7.04438	0.537857	0.647227	0.831018	0.405964	NA
hsa-miR-449c-3p	0.372813	-0.0379169	0.733937	-0.0516623	0.958798	NA
hsa-miR-4518	0.545298	0.587637	0.771344	0.761835	0.446159	NA
hsa-miR-188-3p	3.23606	-0.234835	0.586312	-0.400529	0.688767	NA
hsa-miR-517c-3p	1.98871	1.57392	0.679468	2.31641	0.0205361	NA
hsa-miR-411-3p	5.98721	0.0760446	0.507885	0.149728	0.880979	NA
hsa-miR-6800-5p	0.139502	-0.696685	0.639989	-1.08859	0.276335	NA
hsa-miR-4638-3p	3.16107	-0.0597045	0.562202	-0.106198	0.915426	NA
hsa-miR-4779	3.22688	0.841825	0.62197	1.35348	0.175902	NA
hsa-miR-18b-3p	1.10999	1.5961	0.751216	2.12468	0.0336131	NA
hsa-miR-6730-3p	1.95663	0.244807	0.670812	0.364941	0.715156	NA
hsa-miR-3121-3p	2.42368	0.115956	0.63018	0.184005	0.854009	NA
hsa-miR-676-5p	2.59432	0.46258	0.638059	0.72498	0.468464	NA
hsa-miR-4311	2.2654	0.568847	0.638055	0.891534	0.372643	NA
hsa-miR-4295	0.496716	1.21089	0.74975	1.61506	0.106298	NA
hsa-miR-6744-5p	0.421246	-0.692179	0.763405	-0.906699	0.364566	NA
hsa-miR-5579-5p	1.29843	-0.115463	0.700881	-0.16474	0.869149	NA
hsa-miR-4259	1.41767	0.0111713	0.749777	0.0148995	0.988112	NA
hsa-miR-4653-5p	2.04411	-0.6261	0.698292	-0.896615	0.369924	NA
hsa-miR-6753-5p	1.92664	1.1789	0.671768	1.75492	0.0792722	NA
hsa-miR-6830-3p	2.05524	0.713677	0.640525	1.11421	0.265191	NA
hsa-miR-5572	1.79445	-0.164586	0.713476	-0.230681	0.817562	NA
hsa-miR-4319	0.162712	0.113015	0.68282	0.165512	0.868541	NA
hsa-miR-5089-3p	5.79477	-0.0154066	0.647402	-0.0237976	0.981014	NA
hsa-miR-4688	2.24551	0.451909	0.675064	0.669432	0.50322	NA
hsa-miR-20a-3p	4.37381	-0.0703178	0.610488	-0.115183	0.9083	NA
hsa-miR-3173-5p	4.3217	0.0323362	0.544059	0.059435	0.952606	NA
hsa-miR-4437	2.96032	1.26776	0.585525	2.16516	0.0303751	NA
hsa-miR-3133	4.15243	0.193866	0.469329	0.413071	0.679555	NA
hsa-miR-325	0.201829	0.414384	0.737356	0.561987	0.574125	NA
hsa-miR-6769a-5p	1.13724	0.549346	0.736086	0.746306	0.455483	NA
hsa-miR-138-2-3p	0.0444942	0.275252	0.560318	0.491242	0.623255	NA
hsa-miR-580-5p	0.791116	1.30008	0.764231	1.70115	0.0889139	NA
hsa-miR-6133	0.844007	-1.5202	0.77528	-1.96084	0.0498977	NA
hsa-miR-4536-3p	0.941478	-0.357062	0.729569	-0.489415	0.624548	NA
hsa-miR-548ay-3p	4.39004	-0.468614	0.535669	-0.87482	0.381672	NA
hsa-miR-6772-5p	1.83518	0.620662	0.637243	0.97398	0.330067	NA
hsa-miR-1267	1.03903	-1.56541	0.732414	-2.13733	0.0325708	NA
hsa-miR-1343-5p	6.24375	-0.0301193	0.566946	-0.0531254	0.957632	NA
hsa-miR-33a-3p	0.275834	1.02434	0.732587	1.39825	0.162038	NA
hsa-miR-582-5p	1.7236	0.0258245	0.639537	0.04038	0.96779	NA
hsa-miR-6812-5p	1.17648	0.850944	0.730417	1.16501	0.244014	NA
hsa-miR-4664-5p	1.40641	0.143001	0.672231	0.212726	0.831541	NA
hsa-miR-203b-5p	1.58823	0.0194847	0.733561	0.0265618	0.978809	NA
hsa-miR-4746-3p	0.651966	0.871996	0.768271	1.13501	0.256371	NA
hsa-miR-1324	5.33239	0.616596	0.56625	1.08891	0.276193	NA
hsa-miR-6734-3p	2.55612	-0.447902	0.626347	-0.715103	0.474545	NA
hsa-miR-5589-3p	3.16018	0.276951	0.584477	0.473844	0.635611	NA
hsa-miR-6509-3p	2.67665	0.553946	0.592798	0.93446	0.350067	NA
hsa-miR-7849-3p	2.1356	1.05298	0.668728	1.5746	0.115348	NA
hsa-miR-514b-5p	0	NA	NA	NA	NA	NA
hsa-miR-200a-5p	0.470818	-0.957609	0.780243	-1.22732	0.219702	NA
hsa-miR-885-3p	0	NA	NA	NA	NA	NA
hsa-miR-509-3-5p	1.41484	-0.0253367	0.73796	-0.0343334	0.972611	NA
hsa-miR-6875-5p	7.91939	0.841627	0.45489	1.85018	0.0642881	NA
hsa-miR-6811-3p	0.937079	0.77369	0.737625	1.04889	0.294227	NA
hsa-miR-3606-5p	0.539357	0.260345	0.7748	0.336016	0.736859	NA
hsa-miR-4275	0.842075	0.735509	0.756172	0.972674	0.330715	NA
hsa-miR-630	2.42981	0.339319	0.632204	0.536725	0.591458	NA
hsa-miR-6849-3p	3.3009	-0.663677	0.652939	-1.01645	0.309417	NA
hsa-miR-4755-3p	3.24198	0.935275	0.591528	1.58112	0.113851	NA
hsa-miR-6849-5p	0.935567	-0.640906	0.763731	-0.839178	0.401369	NA
hsa-miR-4711-5p	3.53082	0.454504	0.59003	0.770306	0.441118	NA
hsa-miR-3692-3p	6.36322	0.429775	0.599411	0.716996	0.473377	NA
hsa-miR-1470	7.43053	0.652133	0.440772	1.47952	0.139	NA
hsa-miR-6505-3p	1.66126	0.360356	0.683564	0.527173	0.598074	NA
hsa-miR-519b-3p	2.78336	1.75091	0.630495	2.77704	0.00548572	NA
hsa-miR-5195-5p	4.20544	-0.198394	0.627376	-0.316228	0.751829	NA
hsa-miR-617	0.532465	0.0756942	0.780476	0.0969847	0.922739	NA
hsa-miR-6788-5p	0.815212	0.335306	0.773657	0.433404	0.664721	NA
hsa-miR-4524a-5p	4.18472	0.20447	0.539093	0.379286	0.704476	NA
hsa-miR-4654	1.12519	0.753517	0.720973	1.04514	0.295959	NA
hsa-miR-4423-5p	4.08492	-1.9602	0.606414	-3.23245	0.00122733	NA
hsa-miR-3174	6.46742	-0.257267	0.454279	-0.566319	0.571177	NA
hsa-miR-3188	1.67887	-0.224371	0.686207	-0.326973	0.743688	NA
hsa-miR-1224-5p	1.90637	-0.489523	0.621233	-0.787987	0.430705	NA
hsa-miR-6832-3p	0.37031	-0.0662622	0.774965	-0.0855035	0.931861	NA
hsa-miR-4763-3p	0.874395	0.146591	0.740983	0.197833	0.843176	NA
hsa-miR-6820-3p	1.50997	0.371227	0.696813	0.532751	0.594206	NA
hsa-miR-3678-3p	0.861303	0.0266315	0.738994	0.0360376	0.971252	NA
hsa-miR-8077	2.38366	0.271786	0.716523	0.379313	0.704456	NA
hsa-miR-4696	4.72655	1.44229	0.579962	2.48688	0.0128869	NA
hsa-miR-5008-5p	0.278845	-0.12465	0.755093	-0.165078	0.868882	NA
hsa-miR-363-5p	6.82111	0.77297	0.573438	1.34796	0.177672	NA
hsa-miR-3682-5p	0.800629	1.40333	0.781981	1.79459	0.0727192	NA
hsa-miR-4293	3.28376	0.396575	0.624987	0.634533	0.525733	NA
hsa-miR-555	3.28583	0.385993	0.623465	0.619109	0.535845	NA
hsa-miR-4462	2.73481	0.2647	0.616767	0.429174	0.667797	NA
hsa-miR-6763-5p	1.75213	-0.185537	0.644512	-0.287872	0.773444	NA
hsa-miR-5100	8.00202	-0.0374069	0.563533	-0.0663792	0.947076	NA
hsa-miR-6797-3p	2.38763	0.35588	0.597735	0.595381	0.551589	NA
hsa-miR-4483	0.652922	0.836615	0.763539	1.09571	0.273207	NA
hsa-miR-4742-3p	5.81712	0.183984	0.467401	0.393631	0.693853	NA
hsa-miR-29b-2-5p	5.59513	-1.02169	0.55074	-1.85511	0.0635801	NA
hsa-miR-548ar-5p	1.93772	0.712784	0.656941	1.085	0.27792	NA
hsa-miR-4268	3.10524	0.109017	0.583804	0.186736	0.851867	NA
hsa-miR-4720-3p	1.85363	0.390174	0.650747	0.599579	0.548787	NA
hsa-miR-3157-3p	7.11423	-0.285824	0.499513	-0.572205	0.567183	NA
hsa-miR-608	0.68836	0.183889	0.753875	0.243925	0.807289	NA
hsa-miR-6079	5.1766	0.371577	0.603144	0.616066	0.537851	NA
hsa-miR-6861-3p	0.784086	0.86931	0.754344	1.1524	0.249155	NA
hsa-miR-5011-3p	1.89248	1.18276	0.708161	1.67018	0.0948837	NA
hsa-miR-520e	0.172378	-0.26762	0.627903	-0.426213	0.669953	NA
hsa-miR-4763-5p	1.9448	-0.386689	0.616932	-0.626793	0.530795	NA
hsa-miR-3672	0.431649	1.67891	0.778667	2.15614	0.0310731	NA
hsa-miR-4798-5p	0.634517	0.0118534	0.762857	0.0155382	0.987603	NA
hsa-miR-548ao-5p	3.97999	0.162562	0.62712	0.25922	0.795466	NA
hsa-miR-2113	6.45347	1.97981	0.710968	2.78467	0.00535827	NA
hsa-miR-4703-3p	1.88146	0.631474	0.661912	0.954014	0.340077	NA
hsa-miR-6132	1.02352	0.0674604	0.741418	0.0909884	0.927502	NA
hsa-miR-7159-5p	0.97004	0.354973	0.748967	0.47395	0.635536	NA
hsa-miR-4725-3p	7.05754	-0.227955	0.430918	-0.528998	0.596807	NA
hsa-miR-548ar-3p	1.79038	0.688694	0.6586	1.04569	0.295702	NA
hsa-miR-6731-5p	1.3013	0.732005	0.742464	0.985913	0.324176	NA
hsa-miR-7641	1.02085	-0.267014	0.715414	-0.37323	0.708977	NA
hsa-miR-4769-3p	4.07606	0.937978	0.531392	1.76513	0.0775414	NA
hsa-miR-514b-3p	1.07763	0.338149	0.765667	0.441639	0.65875	NA
hsa-miR-181b-3p	3.45102	-0.143815	0.558503	-0.257502	0.796792	NA
hsa-miR-3616-3p	1.11291	0.0186035	0.728824	0.0255254	0.979636	NA
hsa-miR-4722-3p	3.17937	1.4195	0.638385	2.22357	0.0261772	NA
hsa-miR-182-3p	1.55796	0.851807	0.720492	1.18226	0.237103	NA
hsa-miR-939-3p	3.12883	-0.108641	0.569598	-0.190733	0.848735	NA
hsa-miR-6869-3p	2.04397	0.349083	0.643353	0.542599	0.587406	NA
hsa-miR-1178-5p	2.65961	1.06295	0.617054	1.72261	0.0849582	NA
hsa-miR-3187-5p	0.958438	0.524244	0.771194	0.679782	0.496642	NA
hsa-miR-514a-5p	0	NA	NA	NA	NA	NA
hsa-miR-942-3p	3.47188	0.523384	0.605625	0.864205	0.387475	NA
hsa-miR-5684	6.7936	0.61504	0.491327	1.2518	0.210644	NA
hsa-miR-1236-5p	0.47598	-0.0904237	0.773943	-0.116835	0.906991	NA
hsa-miR-1182	3.01053	0.91574	0.5965	1.53519	0.124737	NA
hsa-miR-7113-5p	2.14935	1.35009	0.683326	1.97576	0.0481822	NA
hsa-miR-6796-5p	1.52033	-0.317002	0.648732	-0.488648	0.625091	NA
hsa-miR-1225-5p	0.971988	0.8792	0.739648	1.18867	0.234568	NA
hsa-miR-7109-5p	4.75171	0.223983	0.610754	0.366731	0.713819	NA
hsa-miR-449a	2.13402	-0.742652	0.641123	-1.15836	0.246717	NA
hsa-miR-4489	0.620536	0.751073	0.775671	0.968288	0.3329	NA
hsa-miR-520g-3p	0.0822745	-0.0144218	0.570644	-0.0252729	0.979837	NA
hsa-miR-767-5p	2.15415	1.39307	0.730911	1.90593	0.0566591	NA
hsa-miR-378f	2.64633	0.39782	0.580467	0.685345	0.493126	NA
hsa-miR-6799-3p	1.11742	0.911346	0.730104	1.24824	0.211943	NA
hsa-miR-5703	1.70417	-0.585141	0.684305	-0.855088	0.392502	NA
hsa-miR-3659	2.2004	1.46109	0.708076	2.06347	0.0390684	NA
hsa-miR-891a-3p	0.905911	-0.223586	0.765663	-0.292017	0.770274	NA
hsa-miR-302c-3p	5.85286	1.51298	0.758223	1.99543	0.0459961	NA
hsa-miR-6740-5p	1.52376	0.0756185	0.670284	0.112816	0.910177	NA
hsa-miR-520d-3p	0.732039	0.263466	0.777555	0.338839	0.734731	NA
hsa-miR-7977	6.16189	0.116789	0.492231	0.237264	0.812452	NA
hsa-miR-194-3p	0.224978	-0.630117	0.74484	-0.845977	0.397566	NA
hsa-miR-1289	2.33834	0.174071	0.594734	0.292688	0.769761	NA
hsa-miR-4329	4.25956	1.64377	0.601861	2.73116	0.00631126	NA
hsa-miR-545-5p	3.17543	0.734542	0.637869	1.15156	0.249504	NA
hsa-miR-499a-5p	5.27993	1.12621	0.605002	1.8615	0.062674	NA
hsa-miR-3664-5p	1.41663	0.170388	0.691163	0.246523	0.805277	NA
hsa-miR-570-3p	2.07038	0.363662	0.671228	0.541786	0.587966	NA
hsa-miR-6782-3p	0.378627	0.918829	0.773532	1.18784	0.234898	NA
hsa-miR-5587-3p	4.30118	0.382803	0.50269	0.761509	0.446353	NA
hsa-miR-3135a	2.72594	1.13992	0.638515	1.78527	0.0742182	NA
hsa-miR-1263	1.08118	0.318876	0.719458	0.443217	0.657609	NA
hsa-miR-548b-3p	1.77195	0.605765	0.657057	0.921938	0.356561	NA
hsa-miR-4283	5.01156	0.381695	0.555483	0.687141	0.491994	NA
hsa-miR-7854-3p	2.7253	0.82339	0.627066	1.31308	0.189155	NA
hsa-miR-6716-5p	2.01691	0.364068	0.687197	0.529787	0.59626	NA
hsa-miR-1261	1.43943	-0.980847	0.748579	-1.31028	0.190102	NA
hsa-miR-3920	1.28345	1.45808	0.7212	2.02175	0.0432027	NA
hsa-miR-6883-5p	1.16995	0.581961	0.725722	0.801906	0.422607	NA
hsa-miR-3144-3p	0.342078	-0.0312817	0.749883	-0.0417154	0.966726	NA
hsa-miR-4666b	4.50108	0.974919	0.688293	1.41643	0.15665	NA
hsa-miR-1825	2.70217	0.371423	0.64188	0.578648	0.562827	NA
hsa-miR-520b	0.202123	-0.572769	0.739005	-0.775053	0.438308	NA
hsa-miR-5691	1.07939	0.224824	0.723333	0.310817	0.75594	NA
hsa-miR-6165	3.04083	0.780376	0.633823	1.23122	0.21824	NA
hsa-miR-512-5p	1.46467	1.75259	0.711618	2.46282	0.0137849	NA
hsa-miR-6808-3p	3.57236	0.747368	0.717156	1.04213	0.297353	NA
hsa-miR-3689a-5p	2.14566	0.285143	0.631358	0.451635	0.651532	NA
hsa-miR-4633-5p	0.226654	-0.159111	0.742095	-0.214408	0.830229	NA
hsa-miR-4252	1.27145	-0.469855	0.691065	-0.6799	0.496568	NA
hsa-miR-6872-5p	3.19848	1.47468	0.557819	2.64365	0.00820163	NA
hsa-miR-889-5p	6.20191	-0.160791	0.515941	-0.311645	0.75531	NA
hsa-miR-4699-5p	0.543216	1.18259	0.778612	1.51885	0.128801	NA
hsa-miR-6777-5p	1.22658	-0.253075	0.747713	-0.338465	0.735013	NA
hsa-miR-937-5p	2.13941	0.697976	0.634111	1.10072	0.27102	NA
hsa-miR-3689f	0.576604	0.490287	0.773	0.634266	0.525908	NA
hsa-miR-2117	3.0605	1.97872	0.671177	2.94813	0.00319698	NA
hsa-miR-96-3p	0.766674	0.187598	0.777379	0.241321	0.809306	NA
hsa-miR-5582-5p	4.00352	1.64685	0.751533	2.19132	0.0284284	NA
hsa-miR-4776-5p	1.23195	1.3343	0.730459	1.82666	0.0677514	NA
hsa-miR-5688	0.967262	-0.163224	0.758175	-0.215285	0.829545	NA
hsa-miR-301b-5p	0.95651	1.45475	0.771424	1.88579	0.0593228	NA
hsa-miR-3591-3p	1.57339	0.526378	0.681744	0.772105	0.440052	NA
hsa-miR-4784	4.26392	0.659296	0.4801	1.37325	0.169675	NA
hsa-miR-3658	2.35337	0.384725	0.599076	0.642198	0.520745	NA
hsa-miR-3190-3p	0.708427	0.102994	0.765131	0.13461	0.89292	NA
hsa-miR-8086	1.22614	-0.331063	0.731712	-0.452449	0.650945	NA
hsa-miR-3944-3p	1.11813	-0.397667	0.728444	-0.545913	0.585126	NA
hsa-miR-1266-5p	1.9992	1.10906	0.660951	1.67797	0.0933532	NA
hsa-miR-135b-5p	3.36969	-0.811722	0.636061	-1.27617	0.201895	NA
hsa-miR-3921	6.58576	0.417821	0.583983	0.715468	0.47432	NA
hsa-miR-512-3p	5.05881	0.666888	0.764747	0.872038	0.383188	NA
hsa-miR-8065	0.732643	0.543021	0.77969	0.696457	0.486143	NA
hsa-miR-1255b-2-3p	2.88706	0.0759946	0.59294	0.128166	0.898018	NA
hsa-miR-6508-3p	1.55599	-0.471842	0.663271	-0.711387	0.476845	NA
hsa-miR-32-5p	1.12691	0.338154	0.766991	0.440885	0.659297	NA
hsa-miR-5087	0.0670359	0.294353	0.560704	0.524971	0.599604	NA
hsa-miR-4447	1.65295	0.348983	0.699219	0.499104	0.617706	NA
hsa-miR-3978	0.168078	0.841436	0.69085	1.21797	0.223235	NA
hsa-miR-4724-3p	1.64093	-0.50064	0.727942	-0.687747	0.491612	NA
hsa-miR-9-3p	0.285011	-1.41334	0.753827	-1.87489	0.0608082	NA
hsa-miR-187-5p	0.0444942	0.275252	0.560318	0.491242	0.623255	NA
hsa-miR-6130	3.94051	0.0603941	0.71757	0.0841647	0.932925	NA
hsa-miR-4316	1.29281	0.316774	0.736335	0.430203	0.667048	NA
hsa-miR-3150b-5p	3.8715	-0.256011	0.540156	-0.473957	0.635531	NA
hsa-miR-1306-5p	7.08385	-0.501963	0.432173	-1.16149	0.245444	NA
hsa-miR-6748-5p	6.03444	0.643527	0.578952	1.11154	0.266337	NA
hsa-miR-520c-3p	0.100401	-0.0532244	0.578463	-0.09201	0.92669	NA
hsa-miR-1234-3p	3.14464	0.152163	0.666155	0.228419	0.81932	NA
hsa-miR-4320	0.726883	1.54522	0.773357	1.99806	0.0457097	NA
hsa-miR-329-5p	3.06224	0.279803	0.591471	0.473063	0.636168	NA
hsa-miR-1279	5.34774	1.2558	0.53065	2.36653	0.0179557	NA
hsa-miR-3679-5p	3.58129	0.641106	0.560981	1.14283	0.253109	NA
hsa-miR-4433b-5p	3.02903	0.382388	0.688444	0.555438	0.578595	NA
hsa-miR-578	0.785863	0.325828	0.769909	0.423204	0.672147	NA
hsa-miR-4439	7.82195	0.569448	0.484354	1.17568	0.239721	NA
hsa-miR-4266	7.7228	-0.190929	0.593245	-0.321838	0.747575	NA
hsa-miR-610	3.35121	-1.0631	0.550788	-1.93014	0.053589	NA
hsa-miR-3938	2.22921	-0.0047831	0.644033	-0.00742679	0.994074	NA
hsa-miR-6891-3p	4.73699	0.545125	0.525279	1.03778	0.299371	NA
hsa-miR-5697	0.113574	0.0201972	0.608861	0.033172	0.973537	NA
hsa-miR-3119	2.99234	0.803131	0.643676	1.24773	0.212132	NA
hsa-miR-3617-3p	1.09237	0.280519	0.754624	0.371733	0.710092	NA
hsa-miR-548aj-3p	0	NA	NA	NA	NA	NA
hsa-miR-6774-3p	1.80552	0.234296	0.646283	0.362529	0.716957	NA
hsa-miR-4643	0.127889	0.43407	0.57401	0.756207	0.449525	NA
hsa-miR-4732-5p	1.0551	-0.498522	0.748689	-0.66586	0.505501	NA
hsa-miR-4519	3.79409	0.0429951	0.633224	0.0678987	0.945866	NA
hsa-miR-6889-5p	2.15688	0.790309	0.683598	1.1561	0.247639	NA
hsa-miR-6872-3p	2.0841	1.13812	0.733701	1.55121	0.120851	NA
hsa-miR-4282	0.546126	0.0969137	0.766363	0.126459	0.899368	NA
hsa-miR-451a	2.03	0.330296	0.634692	0.520403	0.602782	NA
hsa-miR-1204	0.321267	-0.314842	0.725581	-0.433917	0.664349	NA
hsa-miR-5681b	0.127883	-0.448695	0.580115	-0.773459	0.439251	NA
hsa-miR-8067	0.801328	1.76099	0.772372	2.27998	0.0226088	NA
hsa-miR-448	0.842494	0.630996	0.634676	0.994201	0.320125	NA
hsa-miR-3925-3p	0.767255	0.30059	0.768053	0.391366	0.695527	NA
hsa-miR-4632-3p	7.52869	0.530407	0.514741	1.03043	0.302806	NA
hsa-miR-4678	0.817544	0.557867	0.750296	0.74353	0.457161	NA
hsa-miR-6086	6.95689	0.366605	0.530074	0.69161	0.489183	NA
hsa-miR-6841-3p	1.72082	0.314384	0.720721	0.436208	0.662686	NA
hsa-miR-552-3p	0.874815	0.869052	0.754108	1.15242	0.249147	NA
hsa-miR-4418	2.05726	-0.212666	0.69949	-0.304031	0.761105	NA
hsa-miR-4747-5p	2.07435	-0.280982	0.698079	-0.402507	0.687311	NA
hsa-miR-6818-5p	3.6254	0.223348	0.557185	0.40085	0.688531	NA
hsa-miR-548x-3p	0.410197	0.606922	0.776062	0.782054	0.434183	NA
hsa-miR-3657	1.45362	1.68099	0.739426	2.27337	0.023004	NA
hsa-miR-622	2.68988	0.64368	0.710203	0.906334	0.364759	NA
hsa-miR-4501	1.17788	1.82982	0.765366	2.39078	0.0168125	NA
hsa-miR-6802-3p	6.62591	0.921602	0.465491	1.97985	0.0477204	NA
hsa-miR-1290	5.0342	0.234374	0.547696	0.427927	0.668705	NA
hsa-miR-6775-3p	7.41459	0.847671	0.466868	1.81565	0.0694236	NA
hsa-miR-520a-3p	1.83128	0.453975	0.664957	0.682714	0.494788	NA
hsa-miR-6780b-5p	0.596482	1.18124	0.770572	1.53294	0.125291	NA
hsa-miR-6885-3p	5.35059	0.743856	0.615737	1.20807	0.227019	NA
hsa-miR-616-3p	5.1803	0.920704	0.58291	1.5795	0.114222	NA
hsa-miR-675-3p	2.40696	-0.148367	0.614122	-0.241593	0.809096	NA
hsa-miR-711	1.58326	-0.780289	0.747712	-1.04357	0.296685	NA
hsa-miR-1911-5p	0.824914	0.550411	0.777623	0.707813	0.479061	NA
hsa-miR-6735-3p	1.51531	0.281727	0.692679	0.406721	0.684213	NA
hsa-miR-509-3p	2.39312	-0.216528	0.723694	-0.299198	0.764789	NA
hsa-miR-4473	6.08984	-0.123123	0.450812	-0.273113	0.784766	NA
hsa-miR-561-3p	1.26707	0.398207	0.696623	0.571625	0.567576	NA
hsa-miR-149-3p	1.10299	0.26444	0.717324	0.368648	0.71239	NA
hsa-miR-3941	1.4963	1.11726	0.690246	1.61863	0.105526	NA
hsa-miR-6804-5p	4.24791	0.182658	0.609221	0.299823	0.764312	NA
hsa-miR-7852-3p	1.0345	0.778717	0.730503	1.066	0.286423	NA
hsa-miR-7158-3p	5.62582	0.763146	0.575328	1.32645	0.184689	NA
hsa-miR-3612	0.566682	0.251103	0.775986	0.323592	0.746247	NA
hsa-miR-4475	0.916629	0.51045	0.745109	0.685068	0.493301	NA
hsa-miR-5704	0.827636	0.318719	0.753901	0.422759	0.672471	NA
hsa-miR-587	3.28314	-0.154468	0.702452	-0.219898	0.82595	NA
hsa-miR-208b-5p	0.336894	0.345802	0.768984	0.449687	0.652936	NA
hsa-miR-6894-5p	2.77333	1.04917	0.698161	1.50277	0.1329	NA
hsa-miR-1226-5p	1.03733	-0.0114818	0.711801	-0.0161306	0.98713	NA
hsa-miR-1229-5p	0.840299	1.2308	0.755272	1.62962	0.103183	NA
hsa-miR-4716-3p	4.01859	0.24861	0.576792	0.431022	0.666453	NA
hsa-miR-3154	1.69142	-0.0135469	0.71369	-0.0189815	0.984856	NA
hsa-miR-6793-5p	6.512	0.877811	0.578945	1.51623	0.129462	NA
hsa-miR-8081	1.72879	0.673916	0.683549	0.985907	0.324179	NA
hsa-miR-1207-3p	0.705634	0.964733	0.772491	1.24886	0.211716	NA
hsa-miR-4480	0.350593	-0.0137825	0.755061	-0.0182534	0.985437	NA
hsa-miR-6810-5p	0.343908	0.0405246	0.766205	0.05289	0.95782	NA
hsa-miR-6807-3p	2.30665	0.00783441	0.659284	0.0118832	0.990519	NA
hsa-miR-944	1.32416	0.815633	0.699345	1.16628	0.2435	NA
hsa-miR-4799-3p	0.305402	-0.197706	0.755913	-0.261546	0.793671	NA
hsa-miR-6765-3p	5.65153	0.341831	0.514891	0.663891	0.50676	NA
hsa-miR-3130-5p	4.30425	0.485198	0.503448	0.96375	0.335171	NA
hsa-miR-4324	7.93039	0.25607	0.567715	0.451054	0.65195	NA
hsa-miR-6845-3p	4.29248	-0.349339	0.595708	-0.586426	0.557589	NA
hsa-miR-4458	4.6154	0.804719	0.548659	1.4667	0.142457	NA
hsa-miR-890	0.601861	0.00405487	0.775122	0.00523126	0.995826	NA
hsa-miR-3667-3p	2.99825	1.00681	0.649729	1.54958	0.121242	NA
hsa-miR-4491	0.490644	0.334045	0.771876	0.432771	0.665181	NA
hsa-miR-4772-3p	0.739097	0.940438	0.766917	1.22626	0.220101	NA
hsa-let-7f-2-3p	0.970054	-1.05644	0.734078	-1.43914	0.150111	NA
hsa-miR-4999-3p	6.04535	1.18463	0.533854	2.21901	0.026486	NA
hsa-miR-2114-3p	6.34328	1.21171	0.570342	2.12453	0.0336257	NA
hsa-miR-1272	1.54213	0.932092	0.70067	1.33029	0.183424	NA
hsa-miR-613	0.296542	1.05742	0.727524	1.45346	0.146097	NA
hsa-miR-548j-5p	2.41674	-0.549032	0.597605	-0.918721	0.358242	NA
hsa-miR-6718-5p	0.339658	-0.282862	0.770435	-0.367146	0.71351	NA
hsa-miR-135a-3p	0.480396	0.384019	0.774684	0.49571	0.620099	NA
hsa-miR-3613-3p	0.113574	0.0201972	0.608861	0.033172	0.973537	NA
hsa-miR-6801-5p	1.72754	0.767622	0.741508	1.03522	0.300567	NA
hsa-miR-7155-5p	1.57918	0.209333	0.699721	0.299166	0.764813	NA
hsa-miR-367-3p	1.15994	0.6002	0.770395	0.779081	0.435932	NA
hsa-miR-183-3p	0.42706	-0.152906	0.775743	-0.197109	0.843742	NA
hsa-miR-4710	2.00494	0.709064	0.693172	1.02293	0.306343	NA
hsa-miR-5091	7.31191	0.643627	0.509606	1.26299	0.206593	NA
hsa-miR-372-3p	1.79429	1.30159	0.662754	1.96392	0.0495398	NA
hsa-miR-6886-3p	2.15601	-0.188565	0.587496	-0.320964	0.748238	NA
hsa-miR-6810-3p	3.20158	0.665253	0.615885	1.08016	0.280071	NA
hsa-miR-552-5p	2.23233	-0.495071	0.685686	-0.722008	0.47029	NA
hsa-miR-646	1.89313	1.49269	0.65608	2.27516	0.0228963	NA
hsa-miR-494-5p	2.38698	-0.103601	0.596913	-0.173561	0.86221	NA
hsa-miR-144-3p	0	NA	NA	NA	NA	NA
hsa-miR-6760-5p	1.85771	0.117984	0.710089	0.166154	0.868035	NA
hsa-miR-346	2.3532	-0.159049	0.601421	-0.264456	0.791429	NA
hsa-miR-6879-3p	4.28031	0.413662	0.512807	0.806661	0.419862	NA
hsa-miR-1276	6.8243	0.370877	0.461758	0.803186	0.421868	NA
hsa-miR-3151-3p	0.817301	0.455355	0.759208	0.599776	0.548655	NA
hsa-miR-499b-5p	0.422438	-0.682969	0.778225	-0.877598	0.380162	NA
hsa-miR-4774-5p	0.535058	0.537055	0.778173	0.690149	0.490101	NA
hsa-miR-4685-5p	0.693109	-0.0215617	0.763423	-0.0282434	0.977468	NA
hsa-miR-6513-3p	6.39386	-0.697796	0.471096	-1.48122	0.138549	NA
hsa-miR-642a-3p	6.4251	-0.518555	0.467597	-1.10898	0.26744	NA
hsa-miR-548t-3p	0.44982	0.403633	0.775023	0.520801	0.602505	NA
hsa-miR-514a-3p	0.281678	-0.351919	0.731111	-0.481348	0.630269	NA
hsa-miR-378b	2.03922	-0.882463	0.617199	-1.42979	0.152778	NA
hsa-miR-6860	1.21064	0.275317	0.719297	0.382759	0.701899	NA
hsa-miR-1278	0.82568	-0.60246	0.778147	-0.774224	0.438798	NA
hsa-miR-601	0.997804	1.04231	0.746657	1.39597	0.162724	NA
hsa-miR-4652-5p	1.23217	-0.0214065	0.727168	-0.0294382	0.976515	NA
hsa-miR-6502-3p	1.21301	1.0369	0.71001	1.4604	0.144179	NA
hsa-miR-518e-3p	0.9648	1.26044	0.763012	1.65193	0.0985494	NA
hsa-miR-8076	0.679243	1.36809	0.778392	1.75758	0.0788191	NA
hsa-miR-548ad-3p	5.94048	0.296707	0.682227	0.434909	0.663628	NA
hsa-miR-6083	2.97272	-0.394219	0.674419	-0.584532	0.558863	NA
hsa-miR-765	3.30846	-0.0329346	0.602321	-0.0546795	0.956394	NA
hsa-miR-4753-3p	3.37244	0.660968	0.615539	1.0738	0.28291	NA
hsa-miR-3164	3.4525	0.254428	0.589884	0.431318	0.666237	NA
hsa-miR-6516-3p	5.33339	-0.440474	0.584248	-0.753916	0.450899	NA
hsa-miR-7111-5p	1.56789	0.659514	0.715551	0.921687	0.356692	NA
hsa-miR-3927-5p	1.52078	0.261185	0.687244	0.380047	0.703911	NA
hsa-miR-153-5p	0.595662	-0.601764	0.779236	-0.772249	0.439967	NA
hsa-miR-4310	2.30179	0.381348	0.657586	0.57992	0.561968	NA
hsa-miR-3691-3p	1.81476	0.187446	0.665452	0.281682	0.778187	NA
hsa-miR-7845-5p	3.42304	-0.373552	0.54615	-0.683974	0.493991	NA
hsa-miR-518f-3p	0.0444942	0.275252	0.560318	0.491242	0.623255	NA
hsa-miR-2114-5p	5.06968	1.19278	0.549913	2.16904	0.03008	NA
hsa-miR-4700-5p	2.65148	-0.247571	0.576877	-0.429158	0.667808	NA
hsa-miR-4436b-5p	2.86145	1.57818	0.620636	2.54284	0.0109954	NA
hsa-miR-3663-5p	0.471305	0.949913	0.777547	1.22168	0.221829	NA
hsa-miR-3682-3p	1.76028	-0.548025	0.67838	-0.807844	0.41918	NA
hsa-miR-4540	1.97583	0.622925	0.641378	0.971229	0.331434	NA
hsa-miR-155-3p	6.34208	1.16376	0.545895	2.13184	0.0330198	NA
hsa-miR-3064-5p	3.43953	1.29234	0.568507	2.27322	0.023013	NA
hsa-miR-3136-5p	0.66387	0.261866	0.776395	0.337284	0.735903	NA
hsa-miR-7161-3p	1.6594	0.536657	0.665653	0.806211	0.420121	NA
hsa-miR-432-3p	5.43187	-0.0371912	0.451845	-0.0823096	0.934401	NA
hsa-miR-4743-5p	0.525242	-0.0541647	0.777592	-0.069657	0.944467	NA
hsa-miR-6501-5p	5.91323	0.149356	0.581882	0.256678	0.797427	NA
hsa-miR-4789-3p	3.0099	0.422923	0.616812	0.685659	0.492928	NA
hsa-miR-564	5.80657	0.578831	0.577924	1.00157	0.316552	NA
hsa-miR-6794-5p	1.74619	-0.047326	0.653505	-0.0724187	0.942269	NA
hsa-miR-8082	2.64109	0.159398	0.704397	0.22629	0.820976	NA
hsa-miR-620	0.621352	1.12777	0.770439	1.46381	0.143247	NA
hsa-miR-218-1-3p	4.68709	0.0966957	0.547038	0.176762	0.859695	NA
hsa-miR-4676-5p	0.671853	0.11002	0.775477	0.141874	0.88718	NA
hsa-miR-3619-5p	2.82327	0.42084	0.601416	0.699748	0.484084	NA
hsa-miR-6125	2.67869	0.49819	0.587603	0.847834	0.39653	NA
hsa-miR-4648	1.31399	1.36711	0.72747	1.87926	0.0602085	NA
hsa-miR-4794	2.34271	-0.93812	0.722944	-1.29764	0.194412	NA
hsa-miR-1260a	5.31713	0.524723	0.522213	1.00481	0.31499	NA
hsa-miR-3665	3.52956	0.828969	0.641185	1.29287	0.196056	NA
hsa-miR-1914-3p	3.80016	0.316249	0.627936	0.503633	0.614519	NA
hsa-miR-1244	1.8593	0.306178	0.636002	0.481411	0.630225	NA
hsa-miR-6077	2.61395	0.078986	0.564447	0.139935	0.888711	NA
hsa-miR-4689	1.13868	0.0210858	0.677761	0.031111	0.975181	NA
hsa-miR-875-3p	5.19236	-0.319666	0.598732	-0.533905	0.593407	NA
hsa-miR-4297	0.247442	0.384118	0.711745	0.539684	0.589415	NA
hsa-miR-5196-3p	6.60122	0.878598	0.461609	1.90334	0.0569962	NA
hsa-miR-6072	2.90392	-0.312352	0.615669	-0.507338	0.611918	NA
hsa-miR-4272	3.92669	1.01949	0.611043	1.66844	0.0952288	NA
hsa-miR-933	1.86307	-0.43381	0.660653	-0.656638	0.511414	NA
hsa-miR-658	0.0377803	-0.249072	0.561606	-0.4435	0.657404	NA
hsa-miR-7106-3p	0.677861	0.321661	0.769075	0.418244	0.675769	NA
hsa-miR-580-3p	4.61248	0.24317	0.546283	0.445136	0.656222	NA
hsa-miR-4639-5p	2.08076	0.950703	0.660812	1.43869	0.150239	NA
hsa-miR-500b-3p	5.19989	0.559961	0.476861	1.17426	0.240289	NA
hsa-miR-7847-3p	2.17388	0.983181	0.6427	1.52977	0.126074	NA
hsa-miR-3149	0.478735	0.157445	0.763322	0.206262	0.836586	NA
hsa-miR-3117-5p	0.741412	-0.358865	0.77164	-0.465068	0.641883	NA
hsa-miR-4276	1.51756	1.25585	0.711116	1.76602	0.0773924	NA
hsa-miR-7703	0.807786	0.926119	0.754816	1.22695	0.219843	NA
hsa-miR-491-3p	2.60893	-0.0862127	0.651408	-0.132348	0.894709	NA
hsa-miR-596	1.83877	0.954597	0.707398	1.34945	0.177193	NA
hsa-miR-4477b	0.502002	0.428214	0.776384	0.55155	0.581257	NA
hsa-miR-4424	4.42525	0.158134	0.52506	0.301172	0.763283	NA
hsa-miR-216b-3p	0.245162	1.13785	0.73901	1.53969	0.123635	NA
hsa-miR-4260	4.93667	0.112909	0.497078	0.227146	0.82031	NA
hsa-miR-338-5p	1.98629	0.265156	0.616589	0.430036	0.667169	NA
hsa-miR-874-5p	3.65503	-1.21102	0.572789	-2.11426	0.0344931	NA
hsa-miR-106a-3p	1.63668	1.04587	0.695824	1.50307	0.132821	NA
hsa-miR-7973	2.91719	0.991592	0.588691	1.6844	0.0921039	NA
hsa-miR-6828-5p	5.13965	-0.749308	0.558922	-1.34063	0.18004	NA
hsa-miR-575	2.47605	0.394932	0.563351	0.701042	0.483277	NA
hsa-miR-4735-5p	0.3327	0.351559	0.753036	0.466855	0.640604	NA
hsa-miR-6848-5p	5.46332	0.999236	0.628877	1.58892	0.112078	NA
hsa-miR-6833-3p	6.45481	-0.32596	0.490348	-0.664753	0.506208	NA
hsa-miR-6756-5p	2.203	0.31754	0.724125	0.438515	0.661013	NA
hsa-miR-1251-3p	0.799422	1.28259	0.770046	1.6656	0.0957937	NA
hsa-miR-4672	3.42648	0.614707	0.587952	1.04551	0.29579	NA
hsa-miR-3935	1.18628	0.00829093	0.718424	0.0115404	0.990792	NA
hsa-miR-4646-5p	1.61436	-0.146807	0.68014	-0.215848	0.829106	NA
hsa-miR-934	0.0639446	0.294667	0.561168	0.525096	0.599517	NA
hsa-miR-1271-3p	1.76739	0.548984	0.707447	0.776007	0.437745	NA
hsa-miR-1269b	3.37237	0.182151	0.671178	0.27139	0.786091	NA
hsa-miR-4419a	3.72573	0.0895749	0.705658	0.126938	0.898989	NA
hsa-miR-302c-5p	7.10059	1.18984	0.739536	1.6089	0.107638	NA
hsa-miR-6787-3p	3.3502	-0.192691	0.57957	-0.332473	0.739532	NA
hsa-miR-548y	0.346686	1.14801	0.725483	1.5824	0.113558	NA
hsa-miR-6515-5p	2.51246	-0.139996	0.573454	-0.244127	0.807132	NA
hsa-miR-4782-3p	1.44953	0.358202	0.680796	0.526151	0.598783	NA
hsa-miR-7855-5p	0.303814	-0.154767	0.754898	-0.205018	0.837558	NA
hsa-miR-1205	0.690337	-0.449848	0.770583	-0.583776	0.559371	NA
hsa-miR-4445-5p	0.155288	0.115065	0.680709	0.169037	0.865767	NA
hsa-miR-4511	2.13854	-1.04426	0.588401	-1.77474	0.075941	NA
hsa-miR-124-3p	2.44282	0.238013	0.586555	0.405781	0.684903	NA
hsa-miR-3173-3p	2.16538	-0.0763992	0.655033	-0.116634	0.90715	NA
hsa-miR-5188	1.13644	1.2395	0.73417	1.6883	0.0913529	NA
hsa-miR-139-5p	0.879168	-1.2319	0.741489	-1.66138	0.0966362	NA
hsa-miR-7978	0.387776	0.466136	0.772367	0.603516	0.546166	NA
hsa-miR-190b	6.80089	0.253772	0.422593	0.60051	0.548166	NA
hsa-miR-5693	3.88759	0.766691	0.650461	1.17869	0.238522	NA
hsa-miR-6749-5p	2.50476	0.00640057	0.62554	0.0102321	0.991836	NA
hsa-miR-4419b	3.63647	0.134048	0.577102	0.232277	0.816323	NA
hsa-miR-219a-2-3p	1.61965	-0.249648	0.646933	-0.385895	0.699574	NA
hsa-miR-4727-5p	2.19453	0.211891	0.691476	0.306433	0.759275	NA
hsa-miR-96-5p	1.04986	-0.161848	0.72303	-0.223847	0.822876	NA
hsa-miR-551b-3p	2.0705	-0.16767	0.693249	-0.241861	0.808888	NA
hsa-miR-5707	0.401889	0.512999	0.77125	0.665153	0.505953	NA
hsa-miR-6090	3.72854	0.807345	0.624463	1.29286	0.196058	NA
hsa-miR-3162-3p	4.90999	0.219145	0.562889	0.389322	0.697038	NA
hsa-miR-6503-5p	3.38209	0.889254	0.61421	1.4478	0.147673	NA
hsa-miR-4422	1.35969	0.0673096	0.731525	0.0920127	0.926688	NA
hsa-miR-4803	5.56781	1.08814	0.548112	1.98525	0.0471172	NA
hsa-miR-9-5p	4.79807	-0.541386	0.533499	-1.01478	0.31021	NA
hsa-miR-593-5p	3.86998	-0.347244	0.528351	-0.657222	0.511038	NA
hsa-miR-3617-5p	2.60252	0.0411564	0.600738	0.0685098	0.94538	NA
hsa-miR-141-5p	0.866357	-0.823087	0.770827	-1.0678	0.285612	NA
hsa-miR-3146	0.568324	0.00725388	0.778145	0.00932202	0.992562	NA
hsa-miR-4757-5p	3.20194	0.502002	0.608955	0.824366	0.409732	NA
hsa-miR-6073	0.89068	-0.0847231	0.747123	-0.113399	0.909714	NA
hsa-miR-203a-3p	0.821991	0.737541	0.774241	0.952599	0.340793	NA
hsa-miR-4534	1.13092	0.545858	0.762314	0.716054	0.473958	NA
hsa-miR-518c-3p	0.251458	0.981013	0.71572	1.37067	0.170479	NA
hsa-miR-376c-5p	1.0744	0.688423	0.734868	0.936799	0.348862	NA
hsa-miR-649	0.95047	-0.460458	0.767762	-0.599741	0.548679	NA
hsa-miR-8087	1.23088	1.12991	0.745941	1.51474	0.129838	NA
hsa-miR-548n	5.46035	0.590162	0.514054	1.14805	0.250946	NA
hsa-miR-4797-3p	1.51893	0.323329	0.645277	0.501071	0.616321	NA
hsa-miR-4742-5p	1.38179	0.126052	0.692116	0.182125	0.855484	NA
hsa-miR-483-5p	6.32042	1.20247	0.639956	1.87899	0.060246	NA
hsa-miR-410-5p	3.46742	0.209312	0.549753	0.380738	0.703398	NA
hsa-miR-520d-5p	2.02635	0.334359	0.62972	0.530965	0.595443	NA
hsa-miR-497-3p	0.435326	0.518224	0.7666	0.676003	0.499039	NA
hsa-miR-4482-3p	1.08895	0.142437	0.722204	0.197226	0.843651	NA
hsa-miR-23b-5p	3.22406	0.417195	0.617009	0.676157	0.498941	NA
hsa-miR-588	1.66973	-0.0112468	0.653927	-0.0171989	0.986278	NA
hsa-miR-3065-5p	3.56577	-0.434338	0.647913	-0.670365	0.502625	NA
[truncated: 566 more rows]

## Sheet: iPSCs
mature miRNA name	baseMean	log2FoldChange	lfcSE	stat	pvalue	padj
hsa-miR-4482-3p	10.5531	1.8844	0.3516	5.3595	8.34523e-08	0.000101645
hsa-let-7f-5p	287.221	1.12857	0.291716	3.86872	0.000109409	0.0358156
hsa-miR-4264	36.4773	1.5687	0.403698	3.88583	0.000101979	0.0358156
hsa-let-7b-5p	63.4885	1.47065	0.381884	3.85103	0.000117621	0.0358156
hsa-miR-371b-3p	1154.31	1.35651	0.388901	3.48807	0.000486525	0.0385104
hsa-miR-371a-3p	83.7948	1.31176	0.364245	3.6013	0.00031663	0.0385104
hsa-miR-373-3p	831.464	1.35012	0.387389	3.48516	0.000491837	0.0385104
hsa-miR-371a-5p	1162.66	1.37523	0.38838	3.54095	0.000398691	0.0385104
hsa-miR-663a	87.0721	1.09076	0.312779	3.48731	0.000487913	0.0385104
hsa-miR-2113	56.362	1.18159	0.339769	3.47762	0.000505883	0.0385104
hsa-miR-3120-5p	13.2264	1.35008	0.36495	3.69937	0.000216133	0.0385104
hsa-let-7d-5p	19.7731	0.98135	0.276563	3.54838	0.000387614	0.0385104
hsa-miR-6722-3p	2620.72	-1.46381	0.390057	-3.75281	0.000174864	0.0385104
hsa-miR-371b-5p	170.672	1.35316	0.382086	3.54152	0.000397832	0.0385104
hsa-let-7i-5p	100.772	1.15866	0.318738	3.63516	0.000277806	0.0385104
hsa-miR-6891-5p	35.4856	1.42575	0.402831	3.53934	0.000401129	0.0385104
hsa-miR-6879-5p	304.448	-1.32626	0.38375	-3.45605	0.000548158	0.0392739
hsa-miR-98-5p	47.9923	0.891597	0.259245	3.43921	0.000583417	0.0394779
hsa-miR-199a-3p	120.895	1.25191	0.367077	3.41049	0.000648462	0.0415698
hsa-miR-1304-3p	131.483	-1.35697	0.403409	-3.36375	0.000768924	0.0468275
hsa-miR-5587-5p	13.935	1.18343	0.355587	3.32811	0.000874359	0.0507128
hsa-miR-8079	29.8378	-1.27393	0.389101	-3.27403	0.00106027	0.0580485
hsa-miR-302e	118.108	-0.856014	0.263184	-3.25253	0.00114381	0.0580485
hsa-let-7c-5p	93.5689	1.20853	0.371506	3.25305	0.00114174	0.0580485
hsa-miR-3120-3p	10.6023	1.00414	0.311735	3.22114	0.00127684	0.0622076
hsa-miR-1323	1036.17	0.860396	0.274704	3.13208	0.0017357	0.0782992
hsa-let-7g-5p	73.8734	0.865811	0.276057	3.13635	0.00171063	0.0782992
hsa-miR-3655	58.8745	1.14182	0.369229	3.09245	0.00198512	0.0843959
hsa-miR-372-3p	854.194	1.18581	0.385161	3.07875	0.00207872	0.0843959
hsa-miR-6862-3p	11.5745	1.16298	0.377505	3.0807	0.00206517	0.0843959
hsa-miR-423-5p	6771.47	0.763775	0.251825	3.03296	0.0024217	0.0930899
hsa-miR-3184-3p	6804.65	0.760528	0.251001	3.02998	0.00244571	0.0930899
hsa-miR-6807-5p	600.06	-0.8994	0.300437	-2.99364	0.00275669	0.0987543
hsa-miR-5092	15.7683	-0.886561	0.295693	-2.99824	0.0027154	0.0987543
hsa-miR-6751-5p	12.7777	0.831664	0.282955	2.93921	0.0032905	0.111329
hsa-miR-517-5p	214.897	0.780792	0.265026	2.9461	0.00321809	0.111329
hsa-miR-125b-2-3p	23.4032	1.12079	0.383593	2.92182	0.00347998	0.114557
hsa-miR-7846-3p	46.8822	-0.966493	0.33244	-2.90727	0.00364598	0.116863
hsa-miR-34a-5p	655.703	-0.613181	0.212264	-2.88876	0.00386764	0.11777
hsa-miR-1266-3p	219.301	-0.815403	0.282031	-2.89118	0.00383802	0.11777
hsa-miR-5090	20.7124	0.615411	0.214305	2.87166	0.00408324	0.121302
hsa-miR-302b-3p	74410.7	-0.569079	0.202024	-2.81689	0.00484913	0.140625
hsa-miR-302d-3p	93094.7	-0.48905	0.17483	-2.79729	0.00515326	0.142652
hsa-miR-222-3p	26023.1	0.577719	0.206012	2.8043	0.00504263	0.142652
hsa-miR-6837-5p	39.0463	-1.015	0.365966	-2.77349	0.00554588	0.150109
hsa-miR-1273d	15.1989	0.638776	0.232503	2.74739	0.00600725	0.159062
hsa-let-7e-5p	170.681	0.919731	0.342482	2.68549	0.00724243	0.187687
hsa-miR-4292	32.0009	0.938888	0.355104	2.64398	0.00819379	0.194735
hsa-miR-1910-5p	37.5623	0.523166	0.200765	2.60586	0.00916438	0.194735
hsa-miR-3180-5p	29.5559	-0.888954	0.342187	-2.59786	0.00938058	0.194735
hsa-miR-802	27.909	-0.563976	0.219038	-2.57478	0.0100302	0.194735
hsa-miR-3651	167.165	-0.802509	0.308322	-2.60282	0.00924595	0.194735
hsa-miR-125b-1-3p	90.1643	0.929474	0.360853	2.57577	0.0100018	0.194735
hsa-miR-1324	24.7757	0.790817	0.305739	2.58657	0.00969354	0.194735
hsa-miR-302a-3p	22555.4	-0.564617	0.217687	-2.59371	0.00949455	0.194735
hsa-miR-302c-3p	7150.59	-0.676321	0.255285	-2.64928	0.00806634	0.194735
hsa-miR-4439	36.1874	-0.871017	0.330347	-2.63668	0.00837229	0.194735
hsa-miR-6086	26.3944	0.615441	0.233462	2.63615	0.00838529	0.194735
hsa-miR-1290	19.9993	-0.635601	0.244255	-2.6022	0.00926276	0.194735
hsa-miR-139-5p	12.6592	-0.878501	0.341154	-2.57508	0.0100216	0.194735
hsa-miR-193a-3p	43.9258	-0.724827	0.281669	-2.57333	0.0100725	0.194735
hsa-miR-1908-3p	236.238	0.808969	0.306078	2.64301	0.00821717	0.194735
hsa-miR-4537	18.3755	0.963812	0.37324	2.58228	0.0098149	0.194735
hsa-miR-331-3p	488.39	-0.483023	0.190404	-2.53684	0.0111859	0.212882
hsa-miR-7155-3p	9.16746	0.6299	0.249024	2.52948	0.0114232	0.214054
hsa-miR-214-3p	24.5927	1.01482	0.403344	2.51602	0.0118688	0.219034
hsa-miR-10a-5p	4060.09	0.946513	0.378954	2.4977	0.0125003	0.227244
hsa-miR-302b-5p	733.151	-0.540874	0.217511	-2.48665	0.0128952	0.230976
hsa-miR-143-3p	693.584	0.762685	0.309193	2.4667	0.0136365	0.240714
hsa-miR-4313	10.5283	0.649035	0.263949	2.45894	0.0139347	0.242463
hsa-miR-219b-3p	79.1087	0.955792	0.393783	2.42721	0.0152156	0.257397
hsa-miR-142-5p	18.284	0.823471	0.339145	2.42808	0.015179	0.257397
hsa-miR-3605-3p	28.6158	0.789743	0.328057	2.40733	0.0160695	0.260969
hsa-miR-3150a-5p	11.8521	0.798368	0.330545	2.41531	0.0157218	0.260969
hsa-miR-6815-5p	38.5988	0.866759	0.360007	2.40762	0.0160569	0.260969
hsa-miR-615-3p	128.953	0.835369	0.350463	2.38361	0.0171435	0.264426
hsa-miR-1343-5p	17.6585	0.553815	0.232031	2.38682	0.0169948	0.264426
hsa-miR-3607-3p	842.759	-0.640606	0.268036	-2.39	0.0168484	0.264426
hsa-miR-548a-3p	129.747	-0.654664	0.274669	-2.38346	0.0171508	0.264426
hsa-miR-20a-5p	8615.92	-0.49356	0.207673	-2.37662	0.017472	0.266011
hsa-miR-4303	17.5426	0.951864	0.402545	2.36461	0.0180489	0.271402
hsa-miR-4321	8.74566	0.707657	0.303658	2.33044	0.019783	0.277758
hsa-miR-378a-5p	94.0895	-0.46393	0.199761	-2.32242	0.0202102	0.277758
hsa-miR-4661-5p	14.5483	0.54111	0.230755	2.34495	0.0190296	0.277758
hsa-miR-593-5p	9.03366	0.703941	0.30175	2.33286	0.0196555	0.277758
hsa-miR-181a-5p	5834.45	0.932653	0.398827	2.33849	0.0193618	0.277758
hsa-miR-30c-2-3p	24.5727	0.791817	0.341178	2.32083	0.020296	0.277758
hsa-miR-516b-3p	10.133	-0.575688	0.247338	-2.32753	0.019937	0.277758
hsa-miR-28-3p	11598.3	0.460152	0.19588	2.34916	0.0188159	0.277758
hsa-miR-1185-5p	26.0238	-0.859563	0.374274	-2.29661	0.0216408	0.292872
hsa-miR-1273a	28.674	0.447956	0.197026	2.27359	0.0229905	0.307719
hsa-miR-1273c	24.0294	0.377591	0.166492	2.26792	0.0233338	0.308919
hsa-miR-4662a-5p	25.4401	0.868488	0.383978	2.26182	0.0237086	0.310506
hsa-miR-187-3p	905.134	-0.346	0.154233	-2.24335	0.0248739	0.322303
hsa-miR-1206	514.342	-0.710119	0.31881	-2.2274	0.0259203	0.324069
hsa-miR-5579-3p	29.5581	-0.552939	0.247588	-2.2333	0.0255289	0.324069
hsa-miR-367-3p	1558.69	-0.590693	0.265395	-2.22571	0.0260337	0.324069
hsa-miR-103a-2-5p	13.8524	-0.760251	0.34167	-2.2251	0.0260745	0.324069
hsa-miR-518e-3p	162.694	0.601901	0.271057	2.22057	0.0263802	0.324557
hsa-miR-92b-3p	222150	0.514312	0.23214	2.21553	0.0267237	0.325494
hsa-miR-3175	123.703	0.649991	0.29737	2.1858	0.0288305	0.326688
hsa-miR-4479	325.941	0.562661	0.257963	2.18117	0.0291705	0.326688
hsa-miR-24-2-5p	17.2068	0.575776	0.265388	2.16956	0.0300402	0.326688
hsa-miR-412-5p	14.3771	-0.845688	0.385418	-2.19421	0.0282202	0.326688
hsa-miR-4309	463.454	-0.689022	0.31684	-2.17467	0.0296549	0.326688
hsa-miR-1249-3p	385.541	-0.598256	0.273918	-2.18407	0.0289571	0.326688
hsa-miR-208a-5p	12.5317	-0.727817	0.33107	-2.19837	0.0279225	0.326688
hsa-miR-196b-5p	123.171	0.760436	0.350248	2.17114	0.0299209	0.326688
hsa-miR-4662b	25.8342	0.838165	0.38211	2.19352	0.0282699	0.326688
hsa-miR-766-3p	257.354	-0.583967	0.268792	-2.17257	0.029813	0.326688
hsa-miR-4634	7578.35	0.55851	0.254975	2.19045	0.0284918	0.326688
hsa-miR-323a-5p	26.4565	0.873901	0.401213	2.17815	0.0293952	0.326688
hsa-miR-4681	43.7002	0.786902	0.36402	2.1617	0.0306413	0.330275
hsa-miR-770-5p	15.3226	-0.755853	0.350299	-2.15774	0.0309482	0.330657
hsa-miR-125a-5p	4186.06	0.583902	0.271454	2.15102	0.031475	0.333361
hsa-miR-3675-3p	8.68983	0.577215	0.27054	2.13357	0.0328781	0.336517
hsa-miR-3621	69.1259	0.796676	0.372957	2.13611	0.0326707	0.336517
hsa-miR-513a-5p	14.8082	0.599022	0.279906	2.14009	0.0323478	0.336517
hsa-miR-1298-5p	1094.38	-0.528993	0.247816	-2.13462	0.0327923	0.336517
hsa-miR-1294	21.6076	-0.564809	0.265924	-2.12395	0.0336746	0.338972
hsa-miR-219a-5p	85.8187	0.815002	0.38357	2.12478	0.0336047	0.338972
hsa-miR-4750-5p	16.6495	-0.575654	0.272984	-2.10875	0.0349664	0.34909
hsa-miR-519d-5p	76.7946	0.535615	0.255026	2.10024	0.0357077	0.349097
hsa-miR-181b-5p	1473.49	0.845125	0.40196	2.10251	0.0355087	0.349097
hsa-miR-3939	155.961	0.688466	0.328015	2.09889	0.0358269	0.349097
hsa-miR-4520-3p	28.7705	-0.562698	0.271414	-2.07321	0.0381529	0.361288
hsa-miR-5588-3p	38.3261	-0.650177	0.313986	-2.07072	0.0383846	0.361288
hsa-miR-424-3p	36.6101	0.550176	0.266133	2.0673	0.0387063	0.361288
hsa-miR-222-5p	218.455	0.709249	0.343347	2.06569	0.0388577	0.361288
hsa-miR-1292-3p	4889.2	0.733846	0.354013	2.07294	0.038178	0.361288
hsa-miR-4704-3p	21.5039	-0.782603	0.376804	-2.07695	0.0378061	0.361288
hsa-miR-1539	468.658	0.668609	0.324657	2.05943	0.0394528	0.362015
hsa-miR-1275	1996.96	0.344788	0.167736	2.05553	0.0398276	0.362015
hsa-miR-4326	124.065	0.375525	0.182594	2.05661	0.0397236	0.362015
hsa-miR-3195	5229.88	0.594641	0.293031	2.02927	0.0424304	0.3718
hsa-miR-638	51.2511	-0.509279	0.250791	-2.03069	0.0422863	0.3718
hsa-miR-125a-3p	48.8183	0.565187	0.278281	2.03099	0.0422558	0.3718
hsa-miR-4257	11.4949	0.481644	0.236614	2.03556	0.0417942	0.3718
hsa-miR-199a-5p	54.5783	0.820343	0.402176	2.03976	0.041374	0.3718
hsa-miR-5696	12.0964	-0.479433	0.237868	-2.01554	0.043848	0.381477
hsa-miR-6873-5p	9.61305	0.530773	0.263853	2.01163	0.0442595	0.382326
hsa-miR-572	61.9923	0.514453	0.259659	1.98126	0.047562	0.392761
hsa-miR-551a	22.2614	-0.426994	0.215023	-1.9858	0.0470551	0.392761
hsa-miR-1273g-5p	9.28024	0.56004	0.282962	1.97921	0.0477924	0.392761
hsa-miR-7851-3p	16.3993	0.419808	0.211734	1.98272	0.0473989	0.392761
hsa-miR-4300	36.4328	-0.661219	0.332074	-1.99118	0.0464612	0.392761
hsa-miR-4739	23.9736	-0.680139	0.343105	-1.98231	0.0474451	0.392761
hsa-miR-5787	1040.53	0.509936	0.257398	1.98112	0.0475775	0.392761
hsa-miR-1255a	13.5054	0.414208	0.209518	1.97695	0.0480472	0.392761
hsa-miR-140-5p	116.621	-0.443112	0.226556	-1.95587	0.050481	0.404512
hsa-miR-181a-2-3p	623.12	0.789522	0.403163	1.95832	0.0501926	0.404512
hsa-miR-4682	11.6278	-0.46904	0.239292	-1.96012	0.0499823	0.404512
hsa-miR-663b	6910.34	0.689431	0.354	1.94755	0.0514693	0.409736
hsa-miR-1305	60.9999	-0.533886	0.274929	-1.94191	0.0521482	0.412445
hsa-miR-520d-3p	161.944	0.518627	0.269538	1.92413	0.0543378	0.424253
hsa-miR-3126-5p	10.9378	0.526425	0.273372	1.92567	0.0541455	0.424253
hsa-miR-6722-5p	374.773	-0.635583	0.332048	-1.91413	0.0556036	0.431371
hsa-miR-30a-3p	189.165	0.672075	0.352171	1.90838	0.0563425	0.431605
hsa-miR-302c-5p	6958.74	-0.478925	0.250767	-1.90984	0.0561543	0.431605
hsa-miR-5585-3p	221.138	0.407234	0.21405	1.90251	0.0571039	0.434677
hsa-miR-6775-3p	16.5273	0.410575	0.216113	1.89982	0.0574574	0.434677
hsa-miR-99a-5p	176.312	0.757213	0.403267	1.8777	0.0604228	0.45429
hsa-miR-4467	71.1052	0.601038	0.321272	1.87081	0.061372	0.458596
hsa-miR-19b-1-5p	19.8068	-0.419177	0.225183	-1.86149	0.0626747	0.463353
hsa-miR-6884-3p	9.26588	-0.678493	0.374968	-1.80947	0.070378	0.463353
hsa-miR-337-5p	21.006	-0.661615	0.364489	-1.81518	0.0694958	0.463353
hsa-miR-652-5p	10.7709	-0.466034	0.25551	-1.82393	0.0681622	0.463353
hsa-miR-1469	769.461	0.679163	0.374693	1.81258	0.069896	0.463353
hsa-miR-3609	86.115	0.468679	0.257026	1.82347	0.0682319	0.463353
hsa-miR-4665-3p	354.598	0.52867	0.28791	1.83624	0.0663224	0.463353
hsa-miR-891a-5p	14.5623	0.720143	0.397935	1.8097	0.0703423	0.463353
hsa-miR-6864-5p	11.2582	-0.408373	0.224977	-1.81517	0.0694972	0.463353
hsa-miR-4707-5p	410.333	0.516505	0.284681	1.81433	0.069627	0.463353
hsa-miR-5100	13.08	0.578237	0.315231	1.83433	0.0666057	0.463353
hsa-miR-1182	15.8481	0.548686	0.296764	1.84889	0.0644734	0.463353
hsa-miR-6807-3p	20.7359	0.45661	0.24684	1.84982	0.0643389	0.463353
hsa-miR-6890-3p	17.5567	0.62806	0.344263	1.82436	0.068097	0.463353
hsa-miR-6798-5p	71.3616	-0.4946	0.270097	-1.8312	0.0670714	0.463353
hsa-miR-6758-3p	11.0163	0.473493	0.257962	1.83552	0.066429	0.463353
hsa-miR-4691-5p	22.3944	0.4164	0.225511	1.84647	0.0648235	0.463353
hsa-miR-4423-3p	17.7087	0.430001	0.235482	1.82604	0.0678436	0.463353
hsa-miR-4747-3p	9.4511	0.499473	0.274954	1.81657	0.0692831	0.463353
hsa-miR-181d-5p	86.8524	0.530392	0.285311	1.859	0.0630275	0.463353
hsa-miR-5000-5p	15.0991	-0.501603	0.277168	-1.80974	0.0703356	0.463353
hsa-miR-517a-3p	422.178	0.450578	0.245078	1.83851	0.0659877	0.463353
hsa-miR-887-5p	70.1795	0.434978	0.241589	1.80049	0.0717831	0.46755
hsa-miR-584-5p	26.6365	0.571772	0.317476	1.80099	0.0717038	0.46755
hsa-let-7a-5p	2903.51	0.604989	0.338349	1.78806	0.0737658	0.477908
hsa-miR-8072	54.1551	0.506628	0.284147	1.78298	0.0745901	0.478162
hsa-miR-561-5p	1514.59	-0.537209	0.300906	-1.7853	0.0742124	0.478162
hsa-miR-7158-5p	8.78709	0.585267	0.329393	1.77681	0.0756003	0.4821
hsa-miR-6715b-3p	45.6912	-0.674174	0.380547	-1.77159	0.0764621	0.482543
hsa-miR-133a-3p	59.5702	0.517558	0.292054	1.77213	0.0763729	0.482543
hsa-miR-1245b-3p	19.8117	-0.681254	0.385159	-1.76876	0.0769336	0.483016
hsa-miR-4745-3p	14356.4	0.648456	0.370121	1.75201	0.0797721	0.483848
hsa-miR-423-3p	16286.3	0.392001	0.222304	1.76336	0.0778404	0.483848
hsa-miR-548j-5p	18.7257	-0.399762	0.227171	-1.75974	0.0784523	0.483848
hsa-miR-4308	16.502	0.429632	0.244326	1.75844	0.0786731	0.483848
hsa-miR-6874-5p	37.1539	-0.510352	0.291368	-1.75158	0.0798469	0.483848
hsa-miR-106a-5p	3204.44	-0.402041	0.228431	-1.76001	0.0784059	0.483848
hsa-miR-378h	12.9132	-0.490984	0.280053	-1.75318	0.0795709	0.483848
hsa-miR-548c-3p	13.1071	-0.528387	0.304038	-1.7379	0.0822293	0.493376
hsa-miR-29b-3p	19.669	-0.454664	0.261478	-1.73883	0.0820653	0.493376
hsa-miR-7106-5p	499.496	0.498961	0.288957	1.72677	0.0842093	0.495492
hsa-miR-3613-5p	17.7403	-0.474937	0.274193	-1.73213	0.0832513	0.495492
hsa-miR-32-5p	9.42719	-0.508321	0.293691	-1.73081	0.0834865	0.495492
hsa-miR-3200-3p	135.022	-0.296918	0.171802	-1.72826	0.0839422	0.495492
hsa-miR-3178	1623.4	0.524902	0.304784	1.72221	0.0850317	0.497926
hsa-miR-553	10.1563	0.402264	0.234897	1.71251	0.0868023	0.505862
hsa-miR-518c-5p	21.4527	0.448233	0.262148	1.70985	0.0872945	0.50589
hsa-miR-203a-3p	15.7487	-0.475713	0.278522	-1.70799	0.0876378	0.50589
hsa-miR-3610	8.61434	-0.440969	0.260529	-1.69259	0.0905342	0.520145
hsa-miR-3934-5p	36.1871	0.376149	0.224084	1.67861	0.0932282	0.523891
hsa-miR-624-5p	13.9849	-0.415742	0.248522	-1.67285	0.0943559	0.523891
hsa-miR-6793-3p	23.8152	0.546454	0.324943	1.68169	0.0926284	0.523891
hsa-miR-548b-3p	15.1532	-0.358403	0.213611	-1.67783	0.0933803	0.523891
hsa-miR-125b-5p	897.346	0.588675	0.350919	1.67752	0.0934406	0.523891
hsa-miR-187-5p	24.5883	0.373128	0.222996	1.67325	0.0942785	0.523891
hsa-miR-548ap-5p	20.0268	-0.373773	0.223618	-1.67148	0.0946273	0.523891
hsa-miR-3196	285.863	0.48584	0.290244	1.6739	0.0941495	0.523891
hsa-miR-708-3p	136.41	-0.489731	0.293848	-1.66662	0.0955907	0.52683
hsa-miR-3184-5p	2686.21	0.353304	0.21388	1.65188	0.0985596	0.538321
hsa-miR-4448	186.472	-0.466131	0.282156	-1.65203	0.0985288	0.538321
hsa-miR-1914-5p	42.3573	0.518337	0.315512	1.64285	0.100415	0.538789
hsa-miR-6770-3p	9.50863	0.421123	0.256164	1.64396	0.100185	0.538789
hsa-miR-6720-3p	236.516	0.568157	0.345498	1.64446	0.100082	0.538789
hsa-miR-636	13.5433	0.391134	0.237418	1.64745	0.0994666	0.538789
hsa-miR-6805-5p	1424.5	0.520031	0.317693	1.6369	0.101652	0.540665
hsa-miR-6866-5p	24.0229	0.448105	0.273679	1.63734	0.10156	0.540665
hsa-miR-99b-3p	162.404	0.43533	0.266726	1.63212	0.102653	0.541337
hsa-miR-128-3p	5536.25	0.360501	0.220887	1.63206	0.102667	0.541337
hsa-miR-181a-3p	124.143	0.621988	0.383666	1.62117	0.104981	0.544367
hsa-miR-26a-2-3p	78.9107	-0.337257	0.208062	-1.62094	0.10503	0.544367
hsa-miR-5708	12.0321	0.404918	0.248955	1.62647	0.103849	0.544367
hsa-miR-6733-3p	385.391	0.339479	0.209327	1.62176	0.104854	0.544367
hsa-miR-7704	6221.91	0.371291	0.22992	1.61487	0.106338	0.548814
hsa-miR-454-5p	166.093	0.426326	0.264841	1.60975	0.107453	0.549908
hsa-miR-183-3p	22.9483	0.385779	0.239552	1.61042	0.107307	0.549908
hsa-miR-25-5p	620.07	0.37074	0.23073	1.60682	0.108095	0.550876
hsa-miR-1199-5p	26.8945	0.472795	0.295504	1.59996	0.109608	0.554382
hsa-miR-34b-5p	20.0361	-0.441759	0.276173	-1.59957	0.109693	0.554382
hsa-miR-6847-5p	16.1679	0.40172	0.252117	1.59338	0.111074	0.556165
hsa-miR-150-5p	52.3439	0.526857	0.330969	1.59186	0.111416	0.556165
hsa-miR-6803-3p	22.4377	0.374359	0.235121	1.5922	0.11134	0.556165
hsa-miR-548i	12.8257	0.449177	0.283034	1.58701	0.112511	0.55934
hsa-miR-4433a-5p	59.9177	0.489886	0.310298	1.57876	0.114391	0.566377
hsa-miR-17-5p	8528.08	-0.281425	0.179028	-1.57197	0.115959	0.567219
hsa-miR-664b-3p	9.26982	-0.388597	0.246578	-1.57596	0.115034	0.567219
hsa-miR-512-3p	3878.64	0.402696	0.255978	1.57317	0.115679	0.567219
hsa-miR-6502-5p	180.772	-0.421274	0.26839	-1.56963	0.116501	0.567592
hsa-miR-6892-3p	11.4178	0.419768	0.268532	1.5632	0.118007	0.570248
hsa-miR-1254	56.0323	0.3123	0.199742	1.56351	0.117932	0.570248
hsa-miR-484	3710.81	0.353916	0.226679	1.56131	0.11845	0.570248
hsa-miR-15a-5p	309.517	-0.380646	0.24475	-1.55525	0.119887	0.574893
hsa-miR-1237-3p	36.7645	0.314285	0.202511	1.55194	0.120677	0.576411
hsa-miR-6724-5p	4437.07	0.560426	0.363806	1.54045	0.12345	0.576518
hsa-miR-20a-3p	66.7583	-0.330987	0.215118	-1.53863	0.123895	0.576518
hsa-miR-203b-5p	26.9781	-0.376756	0.244942	-1.53815	0.124013	0.576518
hsa-miR-1972	120.636	0.342165	0.221417	1.54534	0.122264	0.576518
hsa-miR-5684	13.0205	0.403011	0.260908	1.54465	0.122431	0.576518
hsa-miR-320e	19.7253	0.358209	0.232838	1.53845	0.123939	0.576518
hsa-miR-4786-5p	10.671	0.395982	0.255802	1.548	0.121622	0.576518
hsa-miR-6889-3p	11.8952	0.320611	0.208964	1.53429	0.124959	0.578709
hsa-miR-3187-3p	38.875	0.319383	0.208594	1.53112	0.125739	0.580114
hsa-miR-3162-5p	12.6397	0.47758	0.312528	1.52812	0.126483	0.581344
hsa-miR-4802-3p	11.3014	-0.354103	0.232372	-1.52386	0.127543	0.584011
hsa-miR-215-5p	13.7018	0.382773	0.25239	1.51659	0.129369	0.585309
hsa-miR-188-5p	47.9078	-0.36888	0.244148	-1.51089	0.130817	0.585309
hsa-miR-212-5p	11.1995	-0.460443	0.305045	-1.50943	0.13119	0.585309
hsa-miR-3615	233.802	0.402987	0.265777	1.51626	0.129453	0.585309
hsa-miR-20b-5p	9743.32	-0.369836	0.244611	-1.51193	0.130551	0.585309
hsa-miR-499b-3p	1535.44	-0.275213	0.181522	-1.51614	0.129484	0.585309
hsa-miR-126-3p	158.549	-0.269901	0.178499	-1.51206	0.130518	0.585309
hsa-miR-6785-5p	456.644	-0.484226	0.323379	-1.49739	0.134291	0.586258
hsa-miR-6735-5p	17.6268	0.349585	0.233431	1.4976	0.134238	0.586258
hsa-miR-5194	9.13537	0.415102	0.275553	1.50644	0.131955	0.586258
hsa-miR-6812-3p	11.3548	0.358301	0.239034	1.49895	0.133886	0.586258
hsa-miR-296-5p	302.852	0.397491	0.264546	1.50254	0.132957	0.586258
hsa-miR-3677-3p	56.8477	-0.306897	0.204077	-1.50383	0.132626	0.586258
hsa-miR-4738-5p	20.8087	-0.46291	0.312603	-1.48082	0.138654	0.587619
hsa-miR-6752-3p	17.2248	-0.573231	0.385266	-1.48788	0.136782	0.587619
hsa-miR-506-3p	8.8942	-0.514241	0.348723	-1.47464	0.140309	0.587619
hsa-miR-1264	21.2641	-0.333077	0.223538	-1.49003	0.136217	0.587619
hsa-miR-522-3p	178.346	0.368544	0.249973	1.47433	0.140392	0.587619
hsa-miR-3908	157.694	0.515592	0.347249	1.48479	0.137599	0.587619
hsa-miR-6872-5p	11.6977	0.403202	0.273084	1.47648	0.139815	0.587619
hsa-miR-6781-3p	651.211	-0.477103	0.323078	-1.47674	0.139745	0.587619
hsa-miR-505-3p	194.293	-0.276504	0.18586	-1.4877	0.13683	0.587619
hsa-miR-130b-5p	3095.58	0.452924	0.306854	1.47602	0.139937	0.587619
hsa-miR-324-5p	42.0235	-0.365935	0.247176	-1.48046	0.13875	0.587619
hsa-miR-19b-3p	2933.14	-0.409119	0.275002	-1.4877	0.136831	0.587619
hsa-miR-6829-3p	14.4285	0.35343	0.240529	1.46939	0.141728	0.591182
hsa-miR-18a-5p	1548.49	-0.303088	0.206721	-1.46617	0.142603	0.592801
hsa-miR-1285-5p	30.5106	0.31345	0.214248	1.46302	0.143461	0.5932
hsa-miR-3910	18.7117	0.370771	0.253562	1.46225	0.143673	0.5932
hsa-miR-6816-5p	797.126	0.473413	0.3251	1.45621	0.145335	0.598036
hsa-miR-3960	165.954	0.362474	0.249732	1.45145	0.146653	0.601197
hsa-miR-4512	636.22	0.45657	0.314901	1.44988	0.147091	0.601197
hsa-miR-3157-5p	18.1054	0.33276	0.230296	1.44492	0.14848	0.603718
hsa-miR-1912	16.9622	-0.388087	0.268732	-1.44414	0.148699	0.603718
hsa-miR-101-5p	32.0571	-0.311235	0.219581	-1.4174	0.156365	0.607442
hsa-miR-374b-5p	378.423	-0.308375	0.218294	-1.41266	0.157755	0.607442
hsa-miR-4517	27.8444	-0.359922	0.25347	-1.41998	0.155614	0.607442
hsa-miR-7976	17.8409	-0.401376	0.279938	-1.4338	0.151628	0.607442
hsa-miR-651-5p	43.4564	-0.393377	0.275255	-1.42913	0.152965	0.607442
hsa-miR-769-3p	17.9118	-0.423509	0.298092	-1.42073	0.155395	0.607442
hsa-miR-668-3p	11.513	0.506834	0.356609	1.42126	0.155242	0.607442
hsa-miR-561-3p	55.7214	-0.433828	0.306511	-1.41537	0.156959	0.607442
hsa-miR-4716-3p	9.30444	0.34008	0.239287	1.42122	0.155252	0.607442
hsa-miR-374c-3p	372.923	-0.310783	0.219917	-1.41319	0.157601	0.607442
hsa-miR-1273f	36.0556	0.389175	0.271609	1.43285	0.151901	0.607442
hsa-miR-5196-3p	55.6793	0.449024	0.314464	1.4279	0.153319	0.607442
hsa-miR-3145-5p	19.9449	-0.390076	0.273579	-1.42583	0.153918	0.607442
hsa-miR-6731-3p	8.79355	0.347343	0.246079	1.41151	0.158095	0.607442
hsa-miR-1181	3359.09	0.499857	0.351392	1.42251	0.154879	0.607442
hsa-miR-224-5p	284.541	-0.359809	0.250342	-1.43727	0.150642	0.607442
hsa-miR-30b-5p	1339.84	-0.332184	0.233678	-1.42155	0.155158	0.607442
hsa-miR-4651	15.3361	0.378	0.268138	1.40972	0.158622	0.607552
hsa-miR-3928-3p	19.3179	0.328519	0.233453	1.40721	0.159364	0.608481
hsa-miR-194-5p	129.708	-0.245137	0.175242	-1.39885	0.161858	0.616072
hsa-miR-6512-3p	376.438	-0.494601	0.355179	-1.39254	0.16376	0.621369
hsa-miR-3201	18.5324	0.463071	0.334489	1.38441	0.166232	0.628084
hsa-miR-328-3p	44.6308	0.491404	0.35523	1.38334	0.166561	0.628084
hsa-miR-148a-5p	1760.2	0.295867	0.215628	1.37212	0.170027	0.63331
hsa-miR-516b-5p	1509.45	0.377578	0.27498	1.37311	0.169718	0.63331
hsa-miR-4701-3p	9.95375	0.308727	0.224205	1.37698	0.168517	0.63331
hsa-miR-519c-5p	144.165	0.345864	0.251685	1.37419	0.169382	0.63331
hsa-miR-190a-5p	155.843	-0.344033	0.252962	-1.36002	0.173824	0.634453
hsa-miR-486-3p	6060.96	0.300588	0.221119	1.35939	0.174023	0.634453
hsa-miR-182-5p	81909.1	0.29572	0.216715	1.36456	0.172392	0.634453
hsa-miR-4454	1716.66	0.35985	0.26477	1.35911	0.174113	0.634453
hsa-miR-193a-5p	40.2888	0.261352	0.192049	1.36086	0.173557	0.634453
hsa-miR-5091	14.756	0.311736	0.229149	1.36041	0.1737	0.634453
hsa-miR-4532	1307.95	0.341483	0.25161	1.35719	0.17472	0.634453
hsa-miR-744-5p	713.421	0.284398	0.209454	1.35781	0.174525	0.634453
hsa-miR-3605-5p	22.1363	0.391168	0.28842	1.35624	0.175022	0.634453
hsa-miR-4268	9.83209	0.332715	0.246506	1.34972	0.177106	0.639613
hsa-miR-3679-5p	15.9566	0.354177	0.262644	1.34851	0.177495	0.639613
hsa-miR-6840-5p	384.891	-0.44279	0.330053	-1.34157	0.179735	0.642061
hsa-miR-515-3p	56.4899	-0.312098	0.232569	-1.34196	0.17961	0.642061
hsa-miR-3936	23.8931	0.423089	0.315383	1.34151	0.179756	0.642061
hsa-miR-4726-5p	52.1978	-0.537428	0.401751	-1.33772	0.180989	0.643252
hsa-miR-374a-3p	905.223	-0.411351	0.307985	-1.33562	0.181674	0.643252
hsa-miR-4472	8.95216	0.464094	0.347094	1.33708	0.181196	0.643252
hsa-miR-375	509.275	-0.523669	0.395108	-1.32538	0.185045	0.643518
hsa-miR-6131	51877.9	0.395926	0.29832	1.32719	0.184446	0.643518
hsa-miR-30a-5p	5267.04	0.455834	0.344242	1.32417	0.185447	0.643518
hsa-miR-4762-5p	18.0327	0.2667	0.201071	1.32639	0.184709	0.643518
hsa-miR-219a-1-3p	105.472	0.53695	0.403224	1.33164	0.182977	0.643518
hsa-miR-6866-3p	10.8756	0.356622	0.269284	1.32433	0.185392	0.643518
hsa-miR-2110	52.3858	0.245851	0.184819	1.33022	0.183444	0.643518
hsa-miR-30c-1-3p	167.182	0.302944	0.230739	1.31293	0.189207	0.649167
hsa-miR-4784	37.2756	-0.345036	0.26224	-1.31573	0.188266	0.649167
hsa-miR-5693	12.7129	-0.358401	0.272695	-1.31429	0.188747	0.649167
hsa-miR-296-3p	430.012	0.385558	0.293233	1.31485	0.18856	0.649167
hsa-miR-8070	8.95385	0.35776	0.273375	1.30868	0.190643	0.65053
hsa-miR-4521	139.36	-0.353088	0.269823	-1.30859	0.190673	0.65053
hsa-miR-4649-5p	282.931	-0.484988	0.371985	-1.30379	0.192307	0.65263
hsa-miR-1471	33.5912	0.349457	0.268064	1.30363	0.19236	0.65263
hsa-miR-106b-3p	320.77	0.301074	0.23144	1.30087	0.193303	0.653264
hsa-miR-4640-5p	12.5878	0.315247	0.242508	1.29995	0.193619	0.653264
hsa-miR-144-5p	21.9118	-0.286264	0.221076	-1.29487	0.195365	0.653722
hsa-miR-3913-3p	15.93	-0.352515	0.272073	-1.29567	0.195091	0.653722
hsa-miR-501-5p	39.3918	-0.297377	0.229119	-1.29792	0.194316	0.653722
hsa-miR-3117-3p	14.2987	-0.333655	0.258799	-1.28924	0.197314	0.656977
hsa-miR-31-5p	1163.97	0.280719	0.21779	1.28895	0.197417	0.656977
hsa-miR-195-5p	104.472	-0.305172	0.237112	-1.28704	0.198081	0.657393
hsa-miR-7112-5p	13.016	0.476547	0.370818	1.28512	0.198749	0.657817
hsa-miR-4741	34.9637	0.355126	0.276874	1.28263	0.199623	0.65892
hsa-miR-6511b-3p	32.4316	0.347315	0.27173	1.27816	0.201193	0.662307
hsa-miR-3918	12.2024	-0.417282	0.328497	-1.27028	0.203986	0.662724
hsa-miR-1913	28.2513	-0.434879	0.341311	-1.27414	0.202612	0.662724
hsa-miR-4696	17.751	0.38729	0.304374	1.27242	0.203225	0.662724
hsa-miR-92b-5p	338.656	0.275507	0.216913	1.27012	0.20404	0.662724
hsa-miR-4516	443.117	0.317414	0.249474	1.27233	0.203256	0.662724
hsa-miR-6773-5p	18.3695	0.395815	0.312402	1.267	0.205154	0.662805
hsa-miR-2277-3p	55.2152	0.503712	0.397538	1.26708	0.205128	0.662805
hsa-miR-7113-3p	9.10791	0.328514	0.261265	1.2574	0.20861	0.670415
hsa-miR-9-5p	1258.27	0.470419	0.373698	1.25882	0.208095	0.670415
hsa-miR-92a-3p	730350	0.235817	0.187809	1.25562	0.209253	0.67071
hsa-miR-3921	11.9668	0.325499	0.261058	1.24684	0.212455	0.679185
hsa-miR-6848-3p	26.3288	0.296629	0.23943	1.2389	0.215384	0.683219
hsa-miR-497-5p	121.486	-0.306961	0.247778	-1.23885	0.215399	0.683219
hsa-miR-602	45.0687	0.321179	0.258642	1.24179	0.214314	0.683219
hsa-miR-877-3p	24.2403	-0.307224	0.248489	-1.23637	0.216322	0.683308
hsa-miR-32-3p	110.166	-0.256443	0.207519	-1.23576	0.216549	0.683308
hsa-miR-363-5p	66.1997	0.297225	0.241029	1.23315	0.21752	0.684597
hsa-miR-4283	13.9001	0.343857	0.279474	1.23037	0.218557	0.68609
hsa-miR-433-3p	24.8683	-0.471703	0.38406	-1.2282	0.219371	0.686875
hsa-miR-548f-5p	12.4737	-0.346986	0.283261	-1.22497	0.220587	0.688888
hsa-miR-4781-3p	26.6307	-0.254784	0.208323	-1.22302	0.221322	0.688888
hsa-miR-943	12.8043	0.325069	0.266016	1.22199	0.221711	0.688888
hsa-miR-6871-3p	76.9071	0.384218	0.31481	1.22047	0.222286	0.688916
hsa-miR-6771-3p	46.3238	-0.259166	0.213867	-1.21181	0.225585	0.693458
hsa-miR-2115-5p	15.5958	-0.254702	0.210099	-1.2123	0.225399	0.693458
hsa-miR-4530	32.9927	-0.455023	0.37585	-1.21065	0.226029	0.693458
hsa-miR-34c-3p	13.6571	0.378466	0.312574	1.2108	0.225971	0.693458
hsa-miR-6503-3p	21.8292	0.317549	0.263002	1.2074	0.227278	0.693795
hsa-miR-326	32.8129	-0.379087	0.313811	-1.20801	0.227043	0.693795
hsa-miR-619-5p	475.257	0.286459	0.237888	1.20417	0.228523	0.694117
hsa-miR-7706	343.661	0.324837	0.26949	1.20538	0.228058	0.694117
hsa-miR-3150b-3p	17.1196	0.260442	0.217148	1.19937	0.230382	0.696944
hsa-miR-5571-3p	28.7296	0.394304	0.32891	1.19882	0.230598	0.696944
hsa-miR-1246	10975	0.24267	0.203448	1.19279	0.232952	0.69714
hsa-miR-7111-3p	8.87488	0.307526	0.257603	1.1938	0.232557	0.69714
hsa-miR-3942-3p	57.5389	-0.194815	0.163244	-1.1934	0.232713	0.69714
hsa-miR-128-1-5p	137.218	0.294862	0.246722	1.19512	0.232041	0.69714
hsa-miR-6777-3p	33.3952	0.193316	0.162327	1.19091	0.233689	0.697629
hsa-miR-6830-5p	17.5485	-0.475224	0.402103	-1.18185	0.237267	0.700413
hsa-miR-4489	13.0217	0.453554	0.38287	1.18461	0.23617	0.700413
hsa-miR-486-5p	4920.17	0.26751	0.22646	1.18127	0.237496	0.700413
hsa-miR-15b-3p	110.113	-0.281613	0.238203	-1.18224	0.237111	0.700413
hsa-miR-6895-5p	24.1835	0.363646	0.30636	1.18699	0.235231	0.700413
hsa-miR-3192-3p	11.4427	-0.374593	0.317881	-1.17841	0.238635	0.702071
hsa-miR-1273h-3p	34.6125	0.230974	0.19634	1.17639	0.239437	0.702279
hsa-miR-19a-3p	961.973	-0.352656	0.300046	-1.17534	0.239859	0.702279
hsa-miR-6803-5p	15.7839	-0.346929	0.295615	-1.17359	0.240561	0.702646
hsa-miR-3181	83.1657	0.469941	0.402417	1.1678	0.242889	0.702706
hsa-miR-3940-3p	41.8857	-0.267024	0.228555	-1.16831	0.24268	0.702706
hsa-miR-155-5p	180.866	-0.19424	0.16633	-1.1678	0.242889	0.702706
hsa-miR-6783-3p	16.7061	0.249201	0.212833	1.17088	0.241649	0.702706
hsa-miR-8069	24.6611	-0.344585	0.299454	-1.15071	0.249851	0.704005
hsa-miR-205-5p	2434.14	-0.277832	0.239885	-1.15818	0.246789	0.704005
hsa-miR-7160-3p	10.0027	0.322667	0.278386	1.15907	0.24643	0.704005
hsa-miR-1273g-3p	1877.47	0.247399	0.215452	1.14828	0.250852	0.704005
hsa-miR-191-3p	137.207	0.273895	0.237148	1.15496	0.248108	0.704005
hsa-miR-627-3p	9.58833	-0.254375	0.221337	-1.14926	0.250448	0.704005
hsa-miR-573	23.6919	-0.34105	0.294686	-1.15733	0.247136	0.704005
hsa-miR-598-3p	264.233	-0.282321	0.243448	-1.15968	0.24618	0.704005
hsa-miR-340-3p	314.54	0.325546	0.28232	1.15311	0.248865	0.704005
hsa-miR-4440	17.2441	-0.306768	0.264604	-1.15935	0.246315	0.704005
hsa-miR-212-3p	10.5367	0.302828	0.26273	1.15262	0.249066	0.704005
hsa-miR-5581-3p	45.9662	-0.293717	0.255771	-1.14836	0.250821	0.704005
hsa-miR-1184	36.7119	0.186285	0.162199	1.14849	0.250765	0.704005
hsa-miR-93-3p	465.204	0.265047	0.231873	1.14307	0.25301	0.708427
hsa-miR-4687-5p	14.1914	0.27037	0.236889	1.14133	0.253731	0.708816
hsa-miR-4497	5961.04	0.295859	0.260327	1.13649	0.255753	0.709583
hsa-miR-23a-3p	177.634	0.248443	0.218185	1.13868	0.254836	0.709583
hsa-miR-4743-3p	26.2632	0.245434	0.215818	1.13722	0.255444	0.709583
hsa-miR-184	61.4321	0.310667	0.27431	1.13254	0.257408	0.712551
hsa-miR-101-3p	2818.87	-0.308729	0.273866	-1.1273	0.259615	0.713794
hsa-miR-3135b	39.0667	0.251488	0.222803	1.12875	0.259005	0.713794
hsa-miR-5096	321.893	0.250373	0.221906	1.12828	0.2592	0.713794
hsa-miR-7975	42.5328	-0.411522	0.367879	-1.11863	0.263297	0.717439
hsa-miR-135a-5p	754.907	-0.313757	0.27981	-1.12132	0.262152	0.717439
hsa-miR-23a-5p	9.08357	0.317518	0.283675	1.1193	0.263011	0.717439
hsa-miR-526b-5p	267.825	0.275657	0.246307	1.11916	0.263072	0.717439
hsa-miR-3942-5p	11.5949	0.268013	0.239894	1.11721	0.263903	0.717486
hsa-miR-874-5p	27.887	0.273378	0.245416	1.11394	0.265305	0.719691
hsa-miR-6749-3p	22.4054	0.229789	0.206711	1.11165	0.266291	0.72019
hsa-miR-22-5p	10.297	-0.309361	0.278513	-1.11076	0.266671	0.72019
hsa-miR-3128	20.6641	0.364454	0.329298	1.10676	0.268398	0.720464
hsa-miR-141-5p	149.599	0.417168	0.376322	1.10854	0.267629	0.720464
hsa-miR-708-5p	375.171	-0.319863	0.289099	-1.10641	0.268547	0.720464
hsa-miR-6863	6572.39	-0.440527	0.400546	-1.09981	0.271413	0.725135
hsa-miR-376a-3p	74.2316	-0.415931	0.378682	-1.09837	0.272045	0.725135
hsa-miR-30c-5p	11352.8	0.232558	0.211945	1.09726	0.272528	0.725135
hsa-miR-875-5p	32.3723	0.375847	0.342634	1.09693	0.27267	0.725135
hsa-miR-7162-3p	42.237	-0.242565	0.222123	-1.09203	0.274821	0.729256
hsa-miR-4785	22.9377	0.247857	0.227251	1.09067	0.275417	0.729256
hsa-miR-6813-5p	12.7249	-0.336872	0.309292	-1.08917	0.276078	0.729422
hsa-miR-6821-3p	16.6497	0.272959	0.251225	1.08651	0.277252	0.729814
hsa-miR-135b-5p	298.954	-0.326255	0.300385	-1.08612	0.277425	0.729814
hsa-miR-4433a-3p	22.1112	0.287379	0.26515	1.08384	0.278437	0.730897
hsa-miR-4760-5p	9.78102	-0.302972	0.280143	-1.08149	0.279478	0.732052
hsa-miR-5590-5p	17.7524	-0.211764	0.196475	-1.07782	0.281114	0.734757
hsa-miR-1271-5p	380.789	0.329471	0.306067	1.07647	0.281719	0.734761
hsa-miR-5588-5p	17.0686	0.243445	0.227556	1.06982	0.284699	0.739368
hsa-miR-30e-3p	1589	0.212535	0.198491	1.07075	0.284281	0.739368
hsa-miR-520a-3p	203.398	0.27693	0.260359	1.06365	0.28749	0.743444
hsa-miR-299-5p	15.095	-0.365643	0.343455	-1.0646	0.287055	0.743444
hsa-miR-138-5p	648.871	-0.310298	0.293239	-1.05817	0.289977	0.747041
hsa-miR-671-3p	425.768	0.254031	0.240131	1.05789	0.290107	0.747041
hsa-miR-5585-5p	43.2732	0.20698	0.196145	1.05524	0.291316	0.747618
hsa-miR-4451	207.216	0.238618	0.226529	1.05337	0.292173	0.747618
hsa-miR-491-5p	10.9922	-0.280488	0.266077	-1.05416	0.29181	0.747618
hsa-miR-5094	531.847	-0.259906	0.247102	-1.05182	0.292884	0.747867
hsa-miR-499a-3p	215.884	0.362094	0.345312	1.0486	0.294363	0.748202
hsa-miR-6511a-3p	24.2235	0.236127	0.225414	1.04752	0.294858	0.748202
hsa-miR-145-5p	13.9075	-0.284625	0.271169	-1.04962	0.293893	0.748202
hsa-miR-1289	32.5839	0.211325	0.20244	1.04389	0.296535	0.750894
hsa-miR-1260b	1481.92	0.277692	0.267878	1.03664	0.299904	0.754475
hsa-miR-718	225.119	-0.408985	0.394462	-1.03682	0.299821	0.754475
hsa-miR-151a-3p	25547.6	0.202245	0.195308	1.03552	0.300427	0.754475
hsa-miR-629-5p	159.25	-0.220676	0.212718	-1.03741	0.299544	0.754475
hsa-miR-6857-3p	8.93352	0.277964	0.270356	1.02814	0.303884	0.760271
hsa-miR-4746-5p	145.002	0.212613	0.207054	1.02685	0.304491	0.760271
hsa-miR-3909	92.4161	0.259154	0.252438	1.0266	0.304608	0.760271
hsa-miR-5088-5p	9.28551	0.289395	0.283945	1.01919	0.308112	0.764263
hsa-miR-4466	198.159	0.264012	0.258555	1.0211	0.307205	0.764263
hsa-miR-548c-5p	14.3144	0.301538	0.296231	1.01792	0.308717	0.764263
hsa-miR-204-5p	8018.63	0.228418	0.223935	1.02002	0.307719	0.764263
hsa-miR-4463	57.2488	0.31535	0.310271	1.01637	0.309454	0.764534
hsa-miR-17-3p	474.585	-0.162331	0.160228	-1.01313	0.310998	0.766794
hsa-miR-6071	161.464	-0.265637	0.262881	-1.01049	0.312263	0.768356
hsa-miR-382-3p	14.1532	-0.404715	0.401206	-1.00875	0.313096	0.768854
hsa-miR-4485-3p	2860.9	0.314151	0.317743	0.988694	0.322813	0.769175
hsa-miR-942-5p	84.9894	0.225824	0.227855	0.991088	0.321643	0.769175
hsa-miR-4520-2-3p	38.1257	-0.223929	0.224785	-0.996189	0.319158	0.769175
hsa-miR-6764-3p	9.35104	0.262483	0.262653	0.999353	0.317624	0.769175
hsa-miR-887-3p	436.098	0.267368	0.268956	0.994095	0.320176	0.769175
hsa-miR-3174	16.3982	0.290563	0.292135	0.994619	0.319922	0.769175
hsa-miR-616-3p	8.62017	0.255206	0.253706	1.00591	0.314459	0.769175
hsa-miR-1911-5p	31.5995	-0.251157	0.251366	-0.999168	0.317714	0.769175
hsa-miR-5193	48.6454	0.211726	0.214233	0.988299	0.323006	0.769175
hsa-miR-100-5p	1323.05	0.354365	0.358483	0.988513	0.322902	0.769175
hsa-miR-4721	10.8769	0.268113	0.266718	1.00523	0.314787	0.769175
hsa-miR-210-3p	241	-0.332724	0.33689	-0.987636	0.323331	0.769175
hsa-miR-4428	10.1446	0.292418	0.292499	0.999723	0.317445	0.769175
hsa-miR-532-3p	58.7169	-0.244883	0.247719	-0.988549	0.322884	0.769175
hsa-miR-3607-5p	5689.23	-0.340949	0.342309	-0.996029	0.319236	0.769175
hsa-miR-1301-5p	51.6743	-0.371378	0.370889	-1.00132	0.316673	0.769175
hsa-miR-518f-5p	40.9009	0.261111	0.264856	0.985858	0.324203	0.769745
hsa-miR-589-3p	115.688	-0.252665	0.257652	-0.980646	0.326768	0.774325
hsa-miR-660-5p	389.921	-0.234111	0.239382	-0.977983	0.328083	0.774428
hsa-miR-4644	12.2918	0.240587	0.245908	0.97836	0.327896	0.774428
hsa-miR-6868-3p	12.4874	0.244202	0.252459	0.967296	0.333396	0.77921
hsa-miR-6500-5p	54.0001	0.249939	0.258684	0.966194	0.333947	0.77921
hsa-let-7a-3p	12.173	0.328328	0.338319	0.970469	0.331813	0.77921
hsa-miR-6848-5p	13.4547	0.312368	0.322701	0.96798	0.333054	0.77921
hsa-miR-374b-3p	145.732	-0.214166	0.221262	-0.967931	0.333079	0.77921
hsa-miR-3147	29.3827	0.312939	0.322779	0.969515	0.332288	0.77921
hsa-miR-3159	10.7759	0.227617	0.236551	0.962229	0.335934	0.782348
hsa-miR-199b-5p	182.939	0.29008	0.315278	0.920077	0.357533	0.782621
hsa-miR-4523	10.3047	-0.2291	0.249293	-0.918999	0.358096	0.782621
hsa-miR-590-3p	128.755	-0.258833	0.271765	-0.952413	0.340888	0.782621
hsa-miR-548q	36.5604	0.165599	0.179866	0.920682	0.357216	0.782621
hsa-miR-424-5p	37.5753	-0.301738	0.31915	-0.945445	0.344432	0.782621
hsa-miR-4256	12.499	-0.319185	0.342885	-0.930879	0.351916	0.782621
hsa-miR-582-3p	52.6007	-0.167933	0.182958	-0.917876	0.358684	0.782621
hsa-miR-4687-3p	15.2828	0.221993	0.241587	0.918894	0.358151	0.782621
hsa-miR-3145-3p	11.1371	-0.25842	0.283661	-0.911016	0.362287	0.782621
hsa-miR-526a	60.1629	0.264672	0.29059	0.910809	0.362396	0.782621
hsa-miR-5001-3p	23.3117	-0.198245	0.207005	-0.957683	0.338222	0.782621
hsa-miR-6756-3p	9.99526	0.251569	0.267014	0.942158	0.346112	0.782621
hsa-miR-367-5p	30.5161	-0.276467	0.294796	-0.937825	0.348334	0.782621
hsa-miR-6742-5p	173.173	0.215432	0.23029	0.935482	0.34954	0.782621
hsa-miR-544b	8.79353	-0.330021	0.348232	-0.947705	0.34328	0.782621
hsa-miR-556-3p	26.208	-0.185143	0.201585	-0.918435	0.358391	0.782621
hsa-miR-1200	19.7491	0.22302	0.233943	0.953308	0.340434	0.782621
hsa-miR-1470	30.1929	0.290042	0.313769	0.924381	0.355288	0.782621
hsa-miR-545-5p	12.5489	-0.305354	0.318058	-0.960056	0.337027	0.782621
hsa-miR-6891-3p	12.0744	0.247618	0.262818	0.942165	0.346108	0.782621
hsa-miR-4519	9.14162	-0.231492	0.25152	-0.920372	0.357378	0.782621
hsa-miR-448	172.626	-0.256739	0.281716	-0.911341	0.362116	0.782621
hsa-miR-4788	45.0218	0.25254	0.276947	0.911872	0.361836	0.782621
hsa-miR-6793-5p	13.4576	-0.367734	0.401802	-0.915211	0.360081	0.782621
hsa-miR-4999-3p	12.952	-0.285779	0.301514	-0.947814	0.343224	0.782621
hsa-miR-33b-5p	29.7472	-0.237697	0.260305	-0.913147	0.361165	0.782621
hsa-miR-200b-5p	19.3948	0.315865	0.330931	0.954475	0.339843	0.782621
hsa-miR-141-3p	673.87	0.355297	0.380761	0.933123	0.350757	0.782621
hsa-miR-185-5p	81.7287	-0.189569	0.202684	-0.935293	0.349637	0.782621
hsa-miR-378d	22.0536	-0.229137	0.246241	-0.930542	0.35209	0.782621
hsa-miR-6845-5p	19.1706	0.188963	0.200261	0.943581	0.345384	0.782621
hsa-miR-525-5p	133.059	0.23076	0.24323	0.948731	0.342757	0.782621
hsa-miR-1296-3p	17.4807	0.253794	0.272425	0.931611	0.351537	0.782621
hsa-miR-873-5p	205.569	-0.256272	0.276077	-0.928263	0.353271	0.782621
hsa-let-7d-3p	38.4903	-0.187557	0.204783	-0.915882	0.359729	0.782621
hsa-miR-3163	16.3915	0.216476	0.232963	0.92923	0.35277	0.782621
hsa-miR-4758-3p	48.9327	0.330212	0.357981	0.922431	0.356304	0.782621
hsa-miR-3180-3p	25.1013	-0.355349	0.370485	-0.959143	0.337487	0.782621
hsa-miR-4650-5p	19.4052	0.299537	0.314621	0.952054	0.34107	0.782621
hsa-miR-2682-3p	96.6338	0.216525	0.235725	0.918549	0.358331	0.782621
hsa-miR-592	86.0044	-0.257759	0.278851	-0.924362	0.355298	0.782621
hsa-miR-1237-5p	90.528	0.209403	0.23022	0.909576	0.363046	0.782638
hsa-miR-26b-3p	39.6233	0.246694	0.272181	0.906359	0.364746	0.783823
hsa-miR-518a-5p	43.6496	-0.24738	0.273016	-0.906099	0.364883	0.783823
hsa-miR-92a-1-5p	489.182	0.186802	0.20754	0.900075	0.36808	0.788594
hsa-miR-28-5p	960.473	0.16919	0.188498	0.897569	0.369415	0.788594
hsa-miR-6747-3p	24.997	0.220433	0.245638	0.89739	0.369511	0.788594
hsa-miR-377-3p	12.5809	-0.359973	0.401829	-0.895834	0.370341	0.788594
hsa-miR-3656	247.595	0.245351	0.273686	0.896468	0.370003	0.788594
hsa-miR-4426	13.3124	-0.268941	0.30103	-0.893401	0.371642	0.789983
hsa-miR-106b-5p	1653.9	-0.196531	0.221221	-0.888392	0.37433	0.793083
hsa-miR-4421	12.3989	-0.29769	0.33514	-0.888257	0.374403	0.793083
hsa-miR-2277-5p	24.7307	0.273292	0.30881	0.884984	0.376165	0.794054
hsa-miR-582-5p	10.2308	-0.236953	0.267746	-0.88499	0.376162	0.794054
hsa-miR-154-5p	8.83657	-0.3419	0.390232	-0.876145	0.380951	0.796851
hsa-miR-5682	11.0344	-0.229972	0.263026	-0.874332	0.381937	0.796851
hsa-miR-1915-3p	49.0332	-0.310869	0.354973	-0.875753	0.381164	0.796851
hsa-miR-450b-5p	79.7752	0.28102	0.320156	0.877759	0.380074	0.796851
hsa-miR-509-3p	12.3061	-0.238899	0.273312	-0.874089	0.38207	0.796851
hsa-miR-148a-3p	66157.7	0.188144	0.214204	0.878341	0.379758	0.796851
hsa-miR-3144-5p	19.1706	0.185902	0.211728	0.878021	0.379932	0.796851
hsa-miR-26a-5p	61888.2	0.174659	0.20083	0.869689	0.38447	0.79782
hsa-miR-6825-3p	34.8909	0.280699	0.32231	0.870897	0.38381	0.79782
hsa-miR-1277-5p	30.4719	-0.264502	0.304153	-0.869636	0.3845	0.79782
hsa-miR-200b-3p	3341.27	0.258615	0.298453	0.866518	0.386206	0.799999
hsa-miR-4764-5p	87.3944	0.249545	0.290105	0.860188	0.389685	0.802434
hsa-miR-655-3p	12.7388	-0.262608	0.306356	-0.857199	0.391335	0.802434
hsa-miR-3912-3p	16.7345	-0.221183	0.257862	-0.857756	0.391027	0.802434
hsa-miR-3124-3p	12.1114	0.291141	0.338864	0.859169	0.390247	0.802434
hsa-miR-99b-5p	21549.3	0.257832	0.299691	0.860325	0.38961	0.802434
hsa-miR-3679-3p	12.2166	-0.217486	0.252992	-0.859658	0.389978	0.802434
hsa-miR-193b-5p	14.2012	0.231869	0.271669	0.853499	0.393383	0.805278
hsa-miR-524-5p	57.2848	0.254104	0.298272	0.851923	0.394257	0.805596
hsa-miR-5189-5p	13.914	0.274052	0.322098	0.850835	0.394861	0.805596
hsa-miR-4693-3p	349.712	0.184142	0.218645	0.842194	0.39968	0.809219
hsa-miR-4661-3p	22.8645	0.167186	0.199057	0.839894	0.400968	0.809219
hsa-miR-210-5p	52.7457	0.287213	0.340688	0.843039	0.399207	0.809219
hsa-miR-4284	7621.13	0.272019	0.324025	0.839499	0.401189	0.809219
hsa-miR-516a-5p	328.292	0.233867	0.277956	0.841381	0.400134	0.809219
hsa-miR-200c-3p	872.58	0.317804	0.378642	0.839324	0.401288	0.809219
hsa-miR-378a-3p	11832.9	-0.127972	0.15192	-0.842365	0.399584	0.809219
hsa-miR-152-3p	58.2262	0.263441	0.315989	0.833704	0.404448	0.813355
hsa-miR-548n	12.1292	-0.194164	0.233274	-0.832343	0.405215	0.813355
hsa-miR-103b	13544.3	-0.172587	0.207406	-0.832119	0.405342	0.813355
hsa-miR-877-5p	833.871	0.210814	0.254425	0.828592	0.407335	0.814403
hsa-miR-6854-3p	11.1206	-0.24947	0.301936	-0.826235	0.408671	0.814403
hsa-miR-3180	38.1855	-0.283862	0.343425	-0.826563	0.408485	0.814403
hsa-miR-1251-5p	260.759	-0.262397	0.317945	-0.825289	0.409208	0.814403
hsa-miR-3928-5p	8.88999	-0.248356	0.300605	-0.826185	0.408699	0.814403
hsa-miR-670-3p	100.171	0.306915	0.374956	0.818536	0.413051	0.820712
hsa-miR-339-3p	129.671	-0.196715	0.242288	-0.811904	0.416847	0.822533
hsa-miR-154-3p	11.3538	-0.325315	0.400869	-0.811526	0.417064	0.822533
hsa-miR-6748-5p	15.7545	-0.29857	0.367483	-0.812474	0.41652	0.822533
hsa-miR-6729-3p	37.5059	-0.202555	0.249961	-0.810345	0.417742	0.822533
hsa-miR-6716-3p	16.5711	0.21355	0.262788	0.81263	0.41643	0.822533
hsa-miR-103a-3p	13311.4	-0.168925	0.208585	-0.809861	0.41802	0.822533
hsa-miR-339-5p	47.4903	-0.201949	0.250389	-0.80654	0.419932	0.824962
hsa-miR-6790-3p	970.433	0.295361	0.367218	0.80432	0.421212	0.826145
hsa-miR-6741-3p	10.3129	0.214192	0.270516	0.791788	0.428484	0.827081
hsa-miR-4715-3p	38.4529	-0.161904	0.210831	-0.767935	0.442526	0.827081
hsa-miR-525-3p	11.6739	-0.241785	0.313972	-0.770085	0.44125	0.827081
hsa-miR-4254	10.7742	0.197879	0.252947	0.782297	0.43404	0.827081
hsa-miR-576-3p	68.3686	-0.142909	0.180523	-0.791636	0.428573	0.827081
hsa-miR-6511b-5p	15.3606	0.174008	0.225359	0.772138	0.440033	0.827081
hsa-miR-3153	525.151	0.285211	0.358085	0.796491	0.425747	0.827081
hsa-miR-204-3p	9.80492	0.195563	0.252719	0.773834	0.439029	0.827081
hsa-miR-550a-3-5p	111.265	0.18116	0.230059	0.787452	0.431017	0.827081
hsa-miR-3155b	35.4462	0.143317	0.184671	0.776065	0.437711	0.827081
hsa-miR-4431	9.93393	0.21581	0.280705	0.768812	0.442005	0.827081
hsa-miR-5699-5p	159.391	-0.147116	0.19195	-0.766433	0.443419	0.827081
hsa-miR-628-5p	78.8764	0.222919	0.281996	0.790503	0.429234	0.827081
hsa-miR-6857-5p	29.8578	-0.17492	0.224627	-0.778714	0.436148	0.827081
hsa-miR-374a-5p	432.207	-0.229069	0.291994	-0.784497	0.432749	0.827081
hsa-miR-520e	56.2852	-0.22283	0.286558	-0.777611	0.436799	0.827081
hsa-miR-7977	25.9719	0.234915	0.299903	0.783305	0.433448	0.827081
hsa-miR-24-3p	101.075	-0.181108	0.22722	-0.797061	0.425416	0.827081
hsa-miR-550b-3p	154.472	0.1744	0.222419	0.784102	0.43298	0.827081
hsa-miR-7152-3p	29.3207	-0.158045	0.204439	-0.773066	0.439483	0.827081
hsa-miR-6785-3p	176.53	-0.255083	0.320531	-0.795812	0.426141	0.827081
hsa-miR-193b-3p	692.16	-0.157376	0.20308	-0.774946	0.438372	0.827081
hsa-miR-551b-3p	76.4507	-0.222859	0.282434	-0.789067	0.430073	0.827081
hsa-miR-4636	12.8627	-0.194799	0.247678	-0.786499	0.431575	0.827081
hsa-miR-6824-3p	172.225	0.177965	0.232118	0.766697	0.443262	0.827081
hsa-miR-548l	12.6443	0.176802	0.222952	0.793003	0.427776	0.827081
hsa-miR-4484	290.27	0.144427	0.185835	0.777178	0.437054	0.827081
hsa-miR-6775-5p	45.4635	0.212819	0.267099	0.796779	0.425579	0.827081
hsa-miR-4285	12.5806	0.207506	0.265146	0.782613	0.433855	0.827081
hsa-miR-33a-5p	34.5515	-0.252395	0.322528	-0.78255	0.433891	0.827081
hsa-miR-6746-3p	37.5175	0.181442	0.235153	0.77159	0.440357	0.827081
hsa-miR-6787-5p	236.683	-0.143308	0.184367	-0.777295	0.436985	0.827081
hsa-miR-15b-5p	1673.54	-0.155125	0.205907	-0.753373	0.451226	0.83549
hsa-miR-6869-5p	14.9804	0.21901	0.289974	0.755275	0.450084	0.83549
hsa-miR-6836-3p	338.387	0.232288	0.308888	0.752014	0.452043	0.83549
hsa-miR-93-5p	12151.6	-0.127599	0.169581	-0.75244	0.451786	0.83549
hsa-miR-3684	17.8308	-0.167822	0.222797	-0.753251	0.451299	0.83549
hsa-miR-3972	11.5176	-0.252401	0.333502	-0.756821	0.449157	0.83549
hsa-miR-3925-5p	19.4042	0.170498	0.227202	0.750424	0.453	0.83599
hsa-miR-4652-3p	14.0064	-0.196731	0.26299	-0.748055	0.454427	0.837356
hsa-miR-5583-5p	12.4998	0.201116	0.269464	0.746357	0.455452	0.837976
hsa-miR-767-5p	1106.57	0.153614	0.2076	0.739953	0.459328	0.843834
hsa-miR-4417	518.577	0.248415	0.336246	0.738789	0.460035	0.843859
hsa-miR-487a-5p	13.3344	0.262651	0.35849	0.732661	0.463766	0.844834
hsa-miR-505-5p	34.8581	0.149791	0.204348	0.733016	0.463549	0.844834
hsa-miR-642b-5p	69.0795	0.252408	0.343802	0.734166	0.462847	0.844834
hsa-miR-6763-3p	388.082	0.248642	0.339574	0.73222	0.464035	0.844834
hsa-miR-8075	9.35385	-0.211995	0.28849	-0.734844	0.462435	0.844834
hsa-miR-4535	9.35314	0.198846	0.273062	0.728208	0.466486	0.845499
hsa-miR-1268a	185.734	0.123441	0.169937	0.726388	0.467601	0.845499
hsa-miR-107	145.246	-0.201659	0.277787	-0.725948	0.467871	0.845499
hsa-miR-1273e	77.569	0.175687	0.241289	0.728121	0.466539	0.845499
hsa-miR-3123	22.8849	-0.194195	0.266428	-0.728884	0.466073	0.845499
hsa-miR-6765-5p	25.7265	-0.240874	0.334334	-0.720459	0.471243	0.84616
hsa-miR-320c	24.0219	0.215416	0.29889	0.72072	0.471082	0.84616
hsa-miR-455-5p	154.244	-0.188524	0.261747	-0.720253	0.471369	0.84616
hsa-miR-676-5p	8.77637	0.183507	0.254977	0.7197	0.47171	0.84616
hsa-miR-130b-3p	6671.69	0.192259	0.266949	0.72021	0.471396	0.84616
hsa-miR-3529-3p	214.557	-0.174824	0.244097	-0.716209	0.473862	0.846282
hsa-miR-421	5520.88	0.186718	0.260659	0.716331	0.473787	0.846282
hsa-miR-4656	11.0669	0.215777	0.301151	0.71651	0.473677	0.846282
hsa-miR-937-3p	61.7084	0.148419	0.2077	0.714582	0.474867	0.846835
hsa-miR-4733-5p	10.2828	0.180939	0.254686	0.71044	0.477431	0.84925
hsa-miR-519d-3p	56.7524	-0.198751	0.280319	-0.709018	0.478313	0.84925
hsa-miR-6089	139.521	0.202346	0.285228	0.709417	0.478066	0.84925
hsa-miR-3913-5p	13.0606	-0.189519	0.267997	-0.707171	0.47946	0.850047
hsa-miR-1273h-5p	35.3422	0.168225	0.238599	0.705055	0.480776	0.851141
hsa-miR-548o-3p	144.058	-0.151528	0.217095	-0.697979	0.48519	0.856981
hsa-miR-634	11.8317	-0.232317	0.333177	-0.697277	0.485629	0.856981
hsa-miR-518a-3p	192.414	0.196191	0.281727	0.696389	0.486186	0.856981
hsa-miR-2681-3p	28.2087	0.234346	0.337677	0.693994	0.487686	0.857145
hsa-miR-200a-3p	715.099	0.246989	0.355373	0.695012	0.487048	0.857145
hsa-miR-4442	48.9449	0.12021	0.177839	0.675948	0.499074	0.866004
hsa-miR-378e	34.0537	-0.16739	0.252672	-0.662479	0.507664	0.866004
hsa-miR-615-5p	15.8568	0.240029	0.359221	0.668194	0.50401	0.866004
hsa-miR-2355-5p	62.4465	-0.249547	0.378029	-0.660128	0.509172	0.866004
hsa-miR-485-5p	68.0349	0.223845	0.338894	0.660516	0.508923	0.866004
hsa-miR-16-2-3p	302.752	-0.126036	0.188395	-0.668998	0.503497	0.866004
hsa-miR-548b-5p	27.633	-0.156784	0.23876	-0.65666	0.5114	0.866004
hsa-miR-510-3p	13.3627	0.239173	0.36285	0.65915	0.509799	0.866004
hsa-miR-4502	22.9271	0.26653	0.395353	0.674156	0.500212	0.866004
hsa-miR-4488	1937.77	0.202801	0.300227	0.675494	0.499362	0.866004
hsa-miR-4804-5p	37.914	-0.187635	0.285648	-0.656875	0.511261	0.866004
hsa-miR-5011-3p	13.1797	0.199773	0.304604	0.655845	0.511924	0.866004
hsa-miR-4646-3p	85.7661	0.192948	0.28593	0.674808	0.499797	0.866004
hsa-miR-4315	49.3661	-0.2701	0.40246	-0.671123	0.502142	0.866004
hsa-miR-342-3p	841.132	-0.16325	0.242336	-0.673652	0.500533	0.866004
hsa-miR-550a-5p	65.4169	0.159825	0.239711	0.666742	0.504937	0.866004
hsa-miR-21-3p	1708.31	-0.140559	0.212224	-0.662315	0.50777	0.866004
hsa-miR-502-3p	47.5725	-0.18929	0.276706	-0.684082	0.493924	0.866004
hsa-miR-4642	10.6945	0.257966	0.388894	0.663333	0.507118	0.866004
hsa-miR-4323	23.9802	-0.140178	0.209353	-0.669576	0.503128	0.866004
hsa-miR-4433b-3p	20.4817	0.24344	0.36621	0.664756	0.506207	0.866004
hsa-miR-1252-5p	14.1302	-0.176177	0.258159	-0.682438	0.494962	0.866004
hsa-miR-3620-3p	27.1411	0.11803	0.178061	0.662861	0.507419	0.866004
hsa-miR-3937	48.759	0.131364	0.197582	0.664859	0.50614	0.866004
hsa-miR-4271	189.421	0.138953	0.207772	0.668778	0.503637	0.866004
hsa-miR-589-5p	900.483	0.157937	0.231886	0.681095	0.495811	0.866004
hsa-miR-618	29.0292	-0.153563	0.233394	-0.657956	0.510566	0.866004
hsa-miR-6784-5p	48.4347	0.160839	0.246739	0.651857	0.514493	0.866085
hsa-miR-324-3p	81.5018	-0.168645	0.259267	-0.650468	0.51539	0.866085
hsa-miR-744-3p	36.7044	-0.173521	0.265848	-0.652707	0.513945	0.866085
hsa-miR-105-5p	291.022	0.140415	0.215938	0.650256	0.515527	0.866085
hsa-miR-6511a-5p	9.09202	0.16344	0.251051	0.651021	0.515033	0.866085
hsa-miR-7-5p	233.562	-0.163997	0.255053	-0.642991	0.52023	0.86797
hsa-miR-520a-5p	185.887	0.17844	0.275622	0.64741	0.517367	0.86797
hsa-miR-1301-3p	181.876	0.17909	0.279402	0.640977	0.521538	0.86797
hsa-miR-320a	2241.94	0.128778	0.200546	0.642136	0.520785	0.86797
hsa-miR-498	63.8131	0.17525	0.272924	0.642121	0.520795	0.86797
hsa-miR-3664-3p	9.28976	-0.149047	0.232586	-0.640824	0.521637	0.86797
hsa-miR-6128	13.8111	-0.162821	0.252146	-0.645744	0.518445	0.86797
hsa-miR-941	1983.77	0.166301	0.262593	0.6333	0.526537	0.868455
hsa-miR-18b-5p	270.531	-0.14171	0.22265	-0.63647	0.52447	0.868455
hsa-miR-548e-5p	27.121	-0.139798	0.22095	-0.632715	0.52692	0.868455
hsa-miR-27b-5p	147.916	0.161449	0.255034	0.633049	0.526702	0.868455
hsa-miR-3653-3p	115.106	-0.185717	0.291363	-0.637406	0.52386	0.868455
hsa-miR-1197	29.4584	-0.22474	0.353638	-0.635509	0.525096	0.868455
hsa-miR-6737-3p	16.9979	0.137715	0.215564	0.638857	0.522916	0.868455
hsa-miR-1265	16.7306	-0.233265	0.379315	-0.614965	0.538578	0.869903
hsa-miR-3685	9.49137	0.144789	0.235318	0.615292	0.538362	0.869903
hsa-miR-6736-3p	35.5917	-0.119047	0.194577	-0.611824	0.540654	0.869903
hsa-miR-130a-3p	11536.9	-0.11464	0.186165	-0.615796	0.538029	0.869903
hsa-miR-577	1229.21	0.133255	0.21772	0.612045	0.540508	0.869903
hsa-miR-523-3p	85.0209	0.147892	0.240876	0.613975	0.539232	0.869903
hsa-miR-3678-5p	11.4746	-0.177268	0.282668	-0.627124	0.530578	0.869903
hsa-miR-485-3p	251.401	0.189286	0.305579	0.619435	0.53563	0.869903
hsa-miR-500b-3p	15.4287	-0.195467	0.319385	-0.612011	0.540531	0.869903
hsa-miR-3115	9.34332	-0.155478	0.253936	-0.612273	0.540357	0.869903
hsa-miR-7108-5p	400.824	0.223222	0.364499	0.612407	0.540268	0.869903
hsa-miR-5689	22.187	-0.170366	0.272093	-0.626132	0.531228	0.869903
hsa-miR-1285-3p	266.148	-0.0896899	0.146031	-0.614184	0.539094	0.869903
hsa-miR-6781-5p	41.9775	0.151763	0.242527	0.625757	0.531474	0.869903
hsa-miR-940	61.0884	-0.125276	0.204434	-0.612795	0.540012	0.869903
hsa-miR-3661	35.6321	-0.151195	0.242351	-0.62387	0.532713	0.869903
hsa-miR-576-5p	150.693	-0.134704	0.219835	-0.612752	0.540041	0.869903
hsa-miR-4783-5p	1018.23	-0.186825	0.297808	-0.627333	0.530441	0.869903
hsa-miR-21-5p	23510.3	-0.112888	0.185184	-0.6096	0.542127	0.871122
hsa-miR-6723-5p	884.472	0.166067	0.273977	0.606133	0.544426	0.87148
hsa-miR-6819-5p	16.4738	0.142962	0.237423	0.602142	0.54708	0.87148
hsa-miR-520f-3p	887.84	-0.175222	0.290409	-0.603361	0.546269	0.87148
hsa-miR-4459	57.1108	0.178192	0.297325	0.599316	0.548962	0.87148
hsa-miR-4769-3p	8.99256	0.180643	0.302367	0.59743	0.55022	0.87148
hsa-miR-548ao-3p	37.259	0.113284	0.188351	0.601451	0.54754	0.87148
hsa-miR-191-5p	74204.8	0.106737	0.178456	0.598112	0.549765	0.87148
hsa-miR-5680	8.88648	0.205024	0.342907	0.597901	0.549906	0.87148
hsa-miR-6769a-3p	52.2942	0.157511	0.26052	0.604601	0.545444	0.87148
hsa-miR-6833-3p	13.8081	0.13372	0.223059	0.599483	0.548851	0.87148
hsa-miR-626	34.0177	0.129429	0.213546	0.606094	0.544452	0.87148
hsa-miR-665	15.5178	-0.190538	0.319801	-0.595801	0.551308	0.872069
hsa-miR-7114-3p	8.94742	-0.155598	0.262228	-0.59337	0.552933	0.873506
hsa-miR-518c-3p	213.726	0.185219	0.314254	0.589395	0.555597	0.876576
hsa-miR-8078	9.96722	0.168644	0.287223	0.587151	0.557102	0.877814
hsa-miR-5705	27.6965	0.137093	0.243264	0.563559	0.573055	0.878379
hsa-miR-4665-5p	773.373	0.188928	0.33537	0.563341	0.573203	0.878379
hsa-miR-762	32.3325	-0.108777	0.185836	-0.585337	0.558321	0.878379
hsa-miR-3688-3p	9.1999	0.141756	0.250129	0.566729	0.570899	0.878379
hsa-miR-4750-3p	29.1853	-0.186392	0.320862	-0.580911	0.561301	0.878379
hsa-miR-365a-3p	234.607	0.106881	0.186519	0.573028	0.566626	0.878379
hsa-miR-7107-5p	10.2569	0.136756	0.238461	0.573493	0.566311	0.878379
hsa-miR-2467-5p	124.587	-0.173627	0.2988	-0.581081	0.561186	0.878379
hsa-miR-6877-3p	12.7385	0.12771	0.223892	0.570408	0.568401	0.878379
hsa-miR-4266	10.9362	-0.177249	0.31474	-0.56316	0.573326	0.878379
hsa-miR-27b-3p	11924.7	-0.130992	0.226577	-0.578135	0.563173	0.878379
hsa-miR-3130-5p	9.84858	0.145806	0.250616	0.58179	0.560708	0.878379
hsa-miR-96-5p	445.006	-0.137884	0.236568	-0.58285	0.559994	0.878379
hsa-miR-4495	10.3581	0.152809	0.269614	0.566768	0.570872	0.878379
hsa-miR-6740-3p	11.9409	0.154808	0.272197	0.568735	0.569536	0.878379
hsa-miR-301b-3p	1504.52	0.205007	0.358521	0.571813	0.567448	0.878379
hsa-miR-345-5p	2573.24	0.138167	0.243978	0.566308	0.571185	0.878379
hsa-miR-30b-3p	16.0451	-0.140821	0.247786	-0.568316	0.56982	0.878379
hsa-miR-3124-5p	31.7298	0.117933	0.203369	0.579894	0.561986	0.878379
hsa-miR-500a-5p	25.3458	-0.134029	0.23732	-0.564759	0.572238	0.878379
hsa-miR-1283	243.921	0.145885	0.252877	0.576902	0.564005	0.878379
hsa-miR-1468-5p	181.266	0.17805	0.31379	0.567419	0.570429	0.878379
hsa-miR-936	22.5293	-0.175466	0.314226	-0.558408	0.576566	0.882233
hsa-miR-876-3p	9.60461	0.139793	0.256719	0.544536	0.586073	0.884815
hsa-miR-3654	13.7001	0.137178	0.248883	0.551176	0.581513	0.884815
hsa-miR-433-5p	9.9016	-0.126991	0.234387	-0.5418	0.587956	0.884815
hsa-miR-4443	77.9855	-0.111164	0.205165	-0.54183	0.587936	0.884815
hsa-miR-7157-5p	90.8308	0.198728	0.364996	0.544465	0.586122	0.884815
hsa-miR-629-3p	56.2998	-0.0850834	0.156085	-0.54511	0.585678	0.884815
hsa-miR-942-3p	18.486	-0.110007	0.199512	-0.551382	0.581372	0.884815
hsa-miR-1276	130.041	0.134836	0.248908	0.54171	0.588018	0.884815
hsa-miR-574-3p	121.255	0.102163	0.188798	0.541121	0.588424	0.884815
hsa-miR-181c-5p	155.379	0.164887	0.300887	0.548002	0.583691	0.884815
hsa-miR-361-5p	1135.22	0.113593	0.208685	0.54433	0.586214	0.884815
hsa-miR-3116	15.7352	-0.127408	0.234239	-0.543925	0.586493	0.884815
hsa-miR-4487	14.8966	0.130816	0.239537	0.546121	0.584983	0.884815
hsa-miR-2115-3p	44.7941	-0.151317	0.27458	-0.551087	0.581574	0.884815
hsa-miR-3622a-5p	956.714	-0.194391	0.360407	-0.539364	0.589636	0.885544
hsa-miR-500a-3p	2055.96	0.129454	0.241239	0.536621	0.591529	0.887294
hsa-miR-6887-5p	11.8689	-0.131652	0.246752	-0.533541	0.593659	0.889394
hsa-miR-6880-3p	13.3199	0.120432	0.226457	0.531811	0.594857	0.890093
hsa-miR-3690	11.8443	-0.155459	0.293038	-0.530507	0.59576	0.890351
hsa-miR-20b-3p	269.624	-0.118146	0.225704	-0.523457	0.600656	0.891708
hsa-miR-23b-3p	269.552	-0.129876	0.247295	-0.525184	0.599455	0.891708
hsa-miR-4258	15.4605	0.139453	0.265988	0.524282	0.600083	0.891708
hsa-miR-140-3p	558.677	-0.101517	0.19436	-0.522313	0.601452	0.891708
hsa-miR-92a-2-5p	81.2163	0.135076	0.257626	0.524312	0.600062	0.891708
hsa-miR-6831-3p	10.9394	0.143146	0.274318	0.521824	0.601793	0.891708
hsa-miR-643	12.9814	0.120148	0.228217	0.526466	0.598565	0.891708
hsa-miR-4531	71.8934	-0.141567	0.272215	-0.520056	0.603025	0.892
hsa-miR-924	28.7319	-0.130523	0.251787	-0.518389	0.604187	0.892
hsa-miR-6501-3p	16.585	0.123102	0.23702	0.519374	0.6035	0.892
hsa-miR-3176	199.07	-0.13048	0.253148	-0.515429	0.606253	0.892886
hsa-miR-605-3p	11.6774	0.167748	0.324818	0.516437	0.605549	0.892886
hsa-miR-1208	20.6587	-0.120658	0.235206	-0.51299	0.607958	0.894316
hsa-miR-1282	9.33838	-0.147847	0.288995	-0.511588	0.608939	0.894411
hsa-miR-450a-5p	40.4779	0.159853	0.314885	0.507656	0.611695	0.894411
hsa-miR-1180-5p	147.643	0.20499	0.402776	0.508944	0.610792	0.894411
hsa-miR-181c-3p	10.9281	0.145157	0.285309	0.50877	0.610914	0.894411
hsa-miR-4306	13.1456	-0.109737	0.216138	-0.507718	0.611651	0.894411
hsa-miR-3156-5p	50.9154	0.113275	0.226896	0.499238	0.617612	0.895053
hsa-miR-34a-3p	20.9547	-0.103999	0.206705	-0.50313	0.614873	0.895053
hsa-miR-517c-3p	49.8475	0.147767	0.296168	0.49893	0.617828	0.895053
hsa-miR-520c-3p	329.911	-0.14163	0.285209	-0.496584	0.619482	0.895053
hsa-miR-6826-5p	14.681	0.139624	0.27949	0.499568	0.617379	0.895053
hsa-miR-6822-5p	296.706	-0.121781	0.244358	-0.49837	0.618223	0.895053
hsa-miR-3158-5p	90.6465	0.104922	0.210604	0.498195	0.618347	0.895053
hsa-miR-1227-3p	19.7399	0.14872	0.297296	0.500244	0.616904	0.895053
hsa-miR-3917	9.61123	0.119931	0.24083	0.49799	0.618491	0.895053
hsa-miR-6720-5p	129.133	-0.173338	0.348646	-0.497175	0.619066	0.895053
hsa-miR-1909-5p	10.9919	0.118025	0.239121	0.493581	0.621602	0.896156
hsa-miR-5702	9.55437	0.131864	0.267245	0.493418	0.621717	0.896156
hsa-miR-520b	356.95	-0.140086	0.285112	-0.491336	0.623189	0.897203
hsa-miR-1538	24.2459	0.101312	0.20663	0.490306	0.623917	0.897203
hsa-miR-1908-5p	317.469	-0.124672	0.256672	-0.485724	0.627163	0.897613
hsa-miR-891b	10.3515	0.127638	0.262893	0.485513	0.627313	0.897613
hsa-miR-1825	11.4013	-0.130986	0.268136	-0.488506	0.625192	0.897613
hsa-miR-5688	9.85565	-0.13096	0.270186	-0.484703	0.627887	0.897613
hsa-miR-7110-3p	9.58978	0.139902	0.28716	0.487192	0.626122	0.897613
hsa-miR-363-3p	24509.5	-0.107861	0.223369	-0.482882	0.62918	0.89815
hsa-miR-4673	13.1432	-0.138552	0.289889	-0.477949	0.632687	0.89815
hsa-miR-1266-5p	40.4159	-0.0996894	0.208194	-0.47883	0.63206	0.89815
hsa-miR-1272	193.965	-0.13752	0.286134	-0.480612	0.630792	0.89815
hsa-miR-548f-3p	847.306	-0.157945	0.330238	-0.478276	0.632454	0.89815
hsa-miR-362-5p	55.1074	-0.106933	0.223596	-0.478243	0.632477	0.89815
hsa-miR-4760-3p	582.333	-0.0936619	0.19649	-0.476676	0.633593	0.898389
hsa-miR-488-5p	46.0106	0.158786	0.336583	0.471758	0.6371	0.901469
hsa-miR-105-3p	44.9278	0.126883	0.269667	0.470518	0.637985	0.901469
hsa-miR-3687	148.838	0.152188	0.323393	0.470598	0.637928	0.901469
hsa-miR-186-5p	17685	0.0875623	0.186995	0.46826	0.639599	0.902701
hsa-miR-4262	171.179	-0.11611	0.251048	-0.462503	0.643721	0.907467
hsa-miR-3943	23.4309	0.123468	0.267976	0.460744	0.644983	0.908195
hsa-miR-451a	8.96175	-0.147067	0.320958	-0.458212	0.6468	0.908654
hsa-miR-3618	29.4175	0.123462	0.26941	0.458268	0.64676	0.908654
hsa-miR-6798-3p	23.1903	0.0966717	0.212737	0.454418	0.649528	0.911434
hsa-miR-604	90.7887	0.108801	0.240112	0.453127	0.650457	0.911688
hsa-miR-2861	24.3489	0.161405	0.362388	0.445392	0.656037	0.914248
hsa-miR-606	16.3646	-0.104644	0.234585	-0.44608	0.655539	0.914248
hsa-miR-1244	13.4707	-0.12849	0.286218	-0.448922	0.653488	0.914248
hsa-miR-2116-3p	21.829	0.103889	0.233246	0.445405	0.656027	0.914248
hsa-miR-4669	64.7453	0.133466	0.29823	0.447528	0.654494	0.914248
hsa-miR-34c-5p	369.925	-0.112372	0.255423	-0.439944	0.659977	0.914508
hsa-miR-3914	24.2058	-0.116774	0.265193	-0.440337	0.659693	0.914508
hsa-miR-3622b-3p	8.94948	0.135197	0.307116	0.440217	0.65978	0.914508
hsa-miR-4742-3p	9.6199	-0.0972403	0.219194	-0.443626	0.657313	0.914508
hsa-miR-25-3p	25444.7	0.0777936	0.17586	0.442362	0.658228	0.914508
hsa-miR-7-1-3p	54.8357	-0.0900123	0.205314	-0.438412	0.661088	0.915006
hsa-miR-6727-5p	10.0047	-0.137155	0.314174	-0.436559	0.662431	0.915824
hsa-miR-4635	10.213	-0.120003	0.276869	-0.433431	0.664702	0.917922
hsa-miR-548ad-5p	36.9978	-0.102227	0.236872	-0.431569	0.666055	0.918748
hsa-miR-641	175.653	-0.0796517	0.186375	-0.427374	0.669107	0.918959
hsa-miR-6127	10.4993	0.124791	0.294002	0.424458	0.671232	0.918959
hsa-miR-5571-5p	8.88916	0.118979	0.278533	0.427162	0.669261	0.918959
hsa-miR-6796-3p	90.5032	-0.119424	0.279429	-0.427388	0.669097	0.918959
hsa-miR-4461	246.353	0.12121	0.285802	0.424106	0.671489	0.918959
hsa-miR-659-5p	21.5263	0.0747362	0.176186	0.424189	0.671428	0.918959
hsa-miR-519a-3p	41.6927	-0.125889	0.293224	-0.429329	0.667684	0.918959
hsa-miR-22-3p	22755.1	0.0796432	0.18916	0.421036	0.673729	0.920116
hsa-miR-5683	9.53042	-0.150763	0.358211	-0.420876	0.673845	0.920116
hsa-miR-200a-5p	46.7896	-0.111612	0.267227	-0.417669	0.676189	0.921251
hsa-miR-7974	2166.08	-0.108279	0.258732	-0.418497	0.675584	0.921251
hsa-miR-4749-5p	167.706	-0.101527	0.244921	-0.41453	0.678486	0.922317
hsa-miR-760	23.1346	0.0945454	0.227913	0.414831	0.678266	0.922317
hsa-miR-18a-3p	427.594	0.05999	0.146656	0.409054	0.6825	0.925119
hsa-miR-3919	14.5533	0.0894191	0.220279	0.405935	0.68479	0.925119
hsa-miR-6869-3p	12.3625	0.111548	0.273712	0.407537	0.683614	0.925119
hsa-miR-616-5p	18.5298	-0.0978264	0.240547	-0.406683	0.684241	0.925119
hsa-miR-518d-3p	11.2953	-0.112582	0.278488	-0.40426	0.686021	0.925119
hsa-miR-605-5p	8.84658	-0.114775	0.28471	-0.403129	0.686854	0.925119
hsa-miR-124-5p	45.0035	-0.10349	0.256881	-0.402872	0.687043	0.925119
hsa-miR-4801	29.3535	0.0916559	0.227768	0.402409	0.687383	0.925119
hsa-miR-3168	977.793	-0.0866938	0.214395	-0.404365	0.685944	0.925119
hsa-miR-135b-3p	136.817	-0.113568	0.282955	-0.401365	0.688151	0.92513
hsa-miR-452-5p	30.2492	0.102914	0.257118	0.400262	0.688964	0.925202
hsa-miR-1226-5p	9.80454	0.104839	0.264359	0.396578	0.691679	0.92614
hsa-miR-4707-3p	8928.86	0.157207	0.395854	0.397135	0.691268	0.92614
hsa-miR-3662	9.67435	0.140092	0.353572	0.396219	0.691943	0.92614
hsa-miR-146b-5p	552.581	-0.126341	0.328966	-0.384056	0.700937	0.927093
hsa-miR-6499-5p	26.6061	-0.076916	0.204969	-0.375257	0.707469	0.927093
hsa-miR-6084	9.27562	0.108982	0.280142	0.389024	0.697258	0.927093
hsa-miR-3127-3p	8.6927	0.10056	0.268941	0.373912	0.70847	0.927093
hsa-miR-628-3p	34.7569	0.101384	0.26954	0.376138	0.706814	0.927093
hsa-miR-5007-3p	281.255	0.134261	0.349304	0.384367	0.700707	0.927093
hsa-miR-6819-3p	56.2302	0.116111	0.308058	0.376914	0.706238	0.927093
hsa-miR-1295a	15.9695	-0.12116	0.324626	-0.37323	0.708978	0.927093
hsa-miR-7848-3p	18.8201	-0.0946943	0.241405	-0.392262	0.694864	0.927093
hsa-miR-1307-5p	2729.78	-0.118554	0.307804	-0.38516	0.700119	0.927093
hsa-miR-548av-5p	485.976	0.0896806	0.232937	0.385	0.700237	0.927093
hsa-miR-558	17.0103	0.128588	0.339725	0.378506	0.705055	0.927093
hsa-miR-520g-3p	192.905	0.104318	0.27037	0.385834	0.699619	0.927093
hsa-miR-3659	12.2956	-0.102149	0.270429	-0.37773	0.705631	0.927093
hsa-miR-642a-5p	34.9525	0.116263	0.312188	0.372415	0.709584	0.927093
hsa-miR-7108-3p	20.9776	-0.0956158	0.257282	-0.371638	0.710162	0.927093
hsa-miR-26b-5p	3456.61	-0.0902757	0.233906	-0.385948	0.699535	0.927093
hsa-miR-550b-2-5p	91.3825	-0.0727463	0.193077	-0.376774	0.706342	0.927093
hsa-miR-218-5p	266.383	0.136525	0.359915	0.379325	0.704447	0.927093
hsa-miR-519c-3p	627.925	0.108255	0.288077	0.375784	0.707078	0.927093
hsa-miR-526b-3p	17.0727	-0.12185	0.313286	-0.388941	0.69732	0.927093
hsa-miR-27a-5p	15.6553	0.097431	0.250544	0.388878	0.697366	0.927093
hsa-miR-5095	122.285	0.061171	0.163923	0.373168	0.709023	0.927093
hsa-miR-3140-5p	35.9609	0.0924954	0.249825	0.370241	0.711203	0.927457
hsa-miR-4449	286.089	0.120945	0.328609	0.36805	0.712836	0.928593
hsa-miR-146b-3p	28.5127	-0.118619	0.324356	-0.365707	0.714583	0.928882
hsa-miR-153-3p	19.4786	-0.139957	0.382458	-0.365941	0.714409	0.928882
hsa-miR-1279	33.2598	-0.108124	0.298604	-0.362097	0.717279	0.931392
hsa-miR-671-5p	158.835	-0.0740976	0.205923	-0.359833	0.718972	0.931605
hsa-miR-5699-3p	20.7333	-0.0718862	0.199532	-0.360274	0.718643	0.931605
hsa-miR-7705	16.8874	-0.0825607	0.235266	-0.350925	0.725645	0.932972
hsa-miR-539-3p	87.7565	-0.135486	0.390887	-0.346613	0.728882	0.932972
hsa-miR-1910-3p	31.2902	0.0955829	0.275206	0.347314	0.728355	0.932972
hsa-miR-1306-3p	12.2681	0.107188	0.303014	0.353739	0.723535	0.932972
hsa-miR-30d-5p	14455.4	-0.0796643	0.227344	-0.350413	0.726029	0.932972
hsa-miR-1298-3p	77.7356	-0.0715333	0.206569	-0.346293	0.729122	0.932972
hsa-miR-8485	24.1664	-0.0878045	0.252228	-0.348116	0.727753	0.932972
hsa-miR-548k	488.488	0.0822561	0.231944	0.354638	0.722861	0.932972
hsa-miR-7161-5p	8.79697	0.101398	0.29292	0.346164	0.72922	0.932972
hsa-miR-6817-3p	9.55196	-0.0996229	0.278869	-0.357239	0.720913	0.932972
hsa-miR-1228-3p	20.9903	0.0747628	0.214732	0.348169	0.727713	0.932972
hsa-miR-3922-5p	12.6339	-0.113874	0.326818	-0.348432	0.727516	0.932972
hsa-miR-16-1-3p	12.1711	0.0915081	0.274854	0.332933	0.739185	0.933967
hsa-miR-384	20.1734	0.113039	0.337654	0.334779	0.737792	0.933967
hsa-miR-518b	352.218	0.0991504	0.291428	0.340222	0.733689	0.933967
hsa-miR-4772-5p	18.3002	0.0656391	0.196909	0.333347	0.738872	0.933967
hsa-miR-129-5p	90.2368	0.0792816	0.236387	0.335389	0.737332	0.933967
hsa-miR-1268b	130.493	0.0633585	0.18642	0.33987	0.733955	0.933967
hsa-miR-548av-3p	197.191	-0.0831575	0.249786	-0.332915	0.739199	0.933967
hsa-miR-6503-5p	11.8778	0.0846945	0.249009	0.340127	0.733761	0.933967
hsa-miR-7112-3p	108.066	-0.0558264	0.164519	-0.339332	0.73436	0.933967
hsa-miR-6789-5p	25.1669	0.104986	0.310282	0.338356	0.735095	0.933967
hsa-miR-195-3p	13.4689	-0.0935109	0.279066	-0.335085	0.737561	0.933967
hsa-miR-539-5p	10.4967	-0.13503	0.403568	-0.334592	0.737933	0.933967
hsa-miR-6881-5p	10.6187	0.111969	0.337515	0.331746	0.740081	0.934113
hsa-miR-4492	366.728	0.0864157	0.264395	0.326844	0.743786	0.937817
hsa-miR-4800-3p	23.8327	0.0964117	0.300572	0.320761	0.748391	0.939733
hsa-miR-449a	19.3141	-0.122025	0.37784	-0.322954	0.74673	0.939733
hsa-miR-548au-5p	28.1365	0.0844797	0.262252	0.322131	0.747353	0.939733
hsa-miR-1303	399.252	0.0588666	0.183397	0.320979	0.748227	0.939733
hsa-miR-4267	21.0717	0.0890078	0.282724	0.314823	0.752896	0.942475
hsa-miR-4274	18.1901	-0.127375	0.402246	-0.31666	0.751501	0.942475
hsa-miR-502-5p	12.9774	0.07926	0.251056	0.315707	0.752225	0.942475
hsa-miR-4485-5p	412.544	0.0994735	0.317193	0.313605	0.753821	0.942663
hsa-miR-4430	76.5546	0.0565294	0.182306	0.310079	0.756501	0.944347
hsa-miR-4691-3p	121.18	-0.0989997	0.320621	-0.308775	0.757493	0.944347
hsa-miR-3177-3p	41.3916	-0.079843	0.258232	-0.309191	0.757176	0.944347
hsa-miR-5706	61.6395	0.0669289	0.217546	0.307654	0.758345	0.944442
hsa-miR-548ab	14.1132	0.0910481	0.297922	0.30561	0.759901	0.945413
hsa-miR-18b-3p	68.2463	0.0828602	0.27276	0.303784	0.761293	0.946178
hsa-miR-4728-3p	44.8354	0.0649266	0.219082	0.296357	0.766957	0.948156
hsa-miR-6727-3p	112.883	-0.0909746	0.309935	-0.293528	0.769119	0.948156
hsa-miR-4503	13.2892	0.0804293	0.274208	0.293315	0.769281	0.948156
hsa-miR-302a-5p	31774.4	0.0486249	0.16594	0.293027	0.769501	0.948156
hsa-miR-6765-3p	12.7656	0.0659675	0.225077	0.293088	0.769455	0.948156
hsa-miR-106a-3p	40.3204	-0.0658506	0.225116	-0.292518	0.76989	0.948156
hsa-miR-3130-3p	16.2606	0.0553003	0.186035	0.297258	0.76627	0.948156
hsa-miR-1307-3p	1100.71	0.0487635	0.163985	0.297365	0.766188	0.948156
hsa-miR-4778-5p	64.484	0.0730077	0.249352	0.292789	0.769683	0.948156
hsa-miR-7151-3p	31.678	0.0593018	0.20541	0.2887	0.772811	0.948468
hsa-miR-5701	360.943	-0.0763362	0.26495	-0.288115	0.773259	0.948468
hsa-miR-4677-3p	49.0687	0.061005	0.210311	0.290071	0.771762	0.948468
hsa-miR-548az-5p	19.7692	0.0747142	0.258784	0.288712	0.772801	0.948468
hsa-miR-6786-5p	14.6279	0.0737874	0.268553	0.274759	0.783501	0.949081
hsa-miR-888-5p	20.9323	0.0570849	0.20378	0.28013	0.779378	0.949081
hsa-miR-1304-5p	54.0792	-0.0758158	0.270693	-0.28008	0.779416	0.949081
hsa-miR-6838-3p	10.7324	-0.0762925	0.273448	-0.279002	0.780243	0.949081
hsa-miR-5191	40.255	0.0718521	0.250942	0.286329	0.774626	0.949081
hsa-miR-3185	22.4784	-0.0935755	0.336732	-0.277893	0.781095	0.949081
hsa-miR-29a-3p	497.497	-0.0534646	0.19019	-0.281112	0.778625	0.949081
hsa-miR-664a-3p	33.2779	-0.0675681	0.246368	-0.274256	0.783888	0.949081
hsa-miR-149-5p	1030.63	-0.0865934	0.311671	-0.277836	0.781138	0.949081
hsa-miR-2392	27.7964	-0.096901	0.341682	-0.2836	0.776717	0.949081
hsa-miR-500b-5p	35.42	-0.057632	0.208768	-0.276057	0.782504	0.949081
hsa-miR-1281	46.6596	-0.0711838	0.259068	-0.274769	0.783493	0.949081
hsa-miR-4513	10.5494	-0.0656739	0.234499	-0.280061	0.779431	0.949081
hsa-miR-6853-3p	12.9972	0.0601082	0.220427	0.27269	0.785091	0.949594
hsa-miR-1228-5p	26.9756	0.0848814	0.319759	0.265454	0.790659	0.952456
hsa-miR-761	9.66675	0.0694749	0.261915	0.265257	0.790811	0.952456
hsa-miR-4632-3p	11.6192	-0.0630976	0.237675	-0.265479	0.790641	0.952456
hsa-miR-3139	28.8565	-0.067953	0.254135	-0.26739	0.789169	0.952456
hsa-miR-8088	10.1575	-0.058531	0.22126	-0.264535	0.791368	0.952456
hsa-miR-873-3p	178.474	0.0673544	0.256936	0.262145	0.79321	0.953731
hsa-miR-1286	94.8246	0.0521975	0.202397	0.257897	0.796487	0.953904
hsa-miR-532-5p	786.325	-0.0545158	0.211306	-0.257994	0.796411	0.953904
hsa-miR-1296-5p	516.39	-0.054232	0.208085	-0.260624	0.794383	0.953904
hsa-miR-301a-5p	43.4332	0.0795537	0.30813	0.258182	0.796266	0.953904
hsa-miR-6844	1244.99	0.0841837	0.336057	0.250504	0.802198	0.956044
hsa-miR-4751	596	0.0425216	0.168213	0.252784	0.800435	0.956044
hsa-miR-6827-3p	26.9584	-0.0777962	0.309038	-0.251737	0.801245	0.956044
hsa-miR-6806-5p	9.14591	0.0622723	0.24757	0.251534	0.801401	0.956044
hsa-miR-6850-3p	525.064	-0.0809971	0.322119	-0.251451	0.801465	0.956044
hsa-miR-6849-3p	11.6452	0.0599519	0.242241	0.247489	0.80453	0.957886
hsa-miR-874-3p	680.388	0.0493529	0.202714	0.24346	0.807649	0.959608
hsa-miR-361-3p	172.996	-0.0449355	0.185249	-0.242568	0.80834	0.959608
hsa-miR-767-3p	21.0837	-0.0526262	0.215262	-0.244475	0.806863	0.959608
hsa-miR-6126	139.123	-0.058235	0.243333	-0.239323	0.810855	0.959813
hsa-miR-4251	9.61087	0.0881428	0.36757	0.239799	0.810486	0.959813
hsa-miR-4444	10.9281	-0.0562961	0.235258	-0.239295	0.810877	0.959813
hsa-miR-676-3p	24.1339	0.0499861	0.213316	0.234328	0.81473	0.960005
hsa-miR-3074-3p	8.80733	0.0779501	0.334398	0.233106	0.815679	0.960005
hsa-miR-4434	21.05	0.0648257	0.275893	0.234967	0.814234	0.960005
hsa-miR-9-3p	37.1831	-0.0835289	0.358507	-0.232991	0.815768	0.960005
hsa-miR-548ap-3p	31.9046	0.053816	0.228597	0.235419	0.813883	0.960005
hsa-miR-4668-5p	388.222	-0.0825421	0.347913	-0.237249	0.812464	0.960005
hsa-miR-1287-5p	27.3587	-0.0733857	0.322053	-0.227869	0.819748	0.960975
hsa-miR-6079	17.1892	0.0673759	0.294884	0.228483	0.819271	0.960975
hsa-miR-183-5p	10475	0.0548181	0.240124	0.22829	0.81942	0.960975
hsa-miR-6886-5p	35.3551	-0.0702495	0.305145	-0.230217	0.817923	0.960975
hsa-miR-627-5p	21.1466	-0.0405287	0.180497	-0.224539	0.822338	0.962452
hsa-miR-548ah-3p	45.4511	0.0787279	0.351124	0.224217	0.822588	0.962452
hsa-miR-1257	19.5464	0.0688904	0.331524	0.207799	0.835386	0.964676
hsa-miR-4790-5p	90.7036	0.0446578	0.211145	0.211503	0.832495	0.964676
hsa-miR-1322	54.6204	-0.0412928	0.198033	-0.208515	0.834827	0.964676
hsa-miR-126-5p	1177.89	-0.057159	0.273081	-0.209311	0.834205	0.964676
hsa-miR-2054	10.0127	0.0575578	0.268647	0.214251	0.830352	0.964676
hsa-miR-6719-3p	13.332	0.0497904	0.235056	0.211823	0.832245	0.964676
hsa-miR-6767-5p	34.2299	-0.0627312	0.290185	-0.216177	0.82885	0.964676
hsa-miR-30d-3p	159.074	-0.0510967	0.246185	-0.207554	0.835578	0.964676
hsa-miR-346	10.1754	0.0603804	0.277067	0.217927	0.827486	0.964676
hsa-miR-29c-3p	23.0897	-0.0673766	0.30782	-0.218883	0.826741	0.964676
hsa-miR-542-3p	15.8965	-0.072519	0.330074	-0.219706	0.8261	0.964676
hsa-miR-4690-5p	50.0334	-0.0677323	0.316533	-0.213982	0.830561	0.964676
hsa-miR-221-3p	3767.51	-0.0347178	0.164396	-0.211184	0.832744	0.964676
hsa-miR-4286	227.544	0.0590177	0.272797	0.216343	0.828721	0.964676
hsa-miR-6768-5p	41.301	-0.0367464	0.177942	-0.206507	0.836395	0.964705
hsa-miR-541-5p	10.1587	-0.0826297	0.403446	-0.20481	0.837721	0.964785
hsa-miR-376a-5p	9.84043	0.0749977	0.368762	0.203377	0.83884	0.964785
hsa-miR-3653-5p	116.559	0.0632899	0.310433	0.203876	0.83845	0.964785
hsa-miR-338-5p	10.8185	-0.0445686	0.227565	-0.19585	0.844727	0.97064
hsa-miR-335-5p	1028.01	-0.0415269	0.217813	-0.190654	0.848797	0.973107
hsa-miR-3171	19.7615	-0.0581342	0.304778	-0.190743	0.848727	0.973107
hsa-miR-330-5p	231.259	-0.046522	0.244791	-0.190048	0.849272	0.973107
hsa-miR-8074	9.50315	-0.0437678	0.240243	-0.182181	0.85544	0.975587
hsa-miR-512-5p	25.4746	-0.0501043	0.272439	-0.18391	0.854084	0.975587
hsa-miR-885-5p	13.657	-0.049409	0.27044	-0.182699	0.855034	0.975587
hsa-miR-6859-3p	13.0167	0.0436023	0.236048	0.184718	0.85345	0.975587
hsa-miR-5000-3p	11.9694	-0.0482427	0.259223	-0.186105	0.852362	0.975587
hsa-miR-3151-5p	14.2618	0.0452925	0.25054	0.18078	0.85654	0.975927
hsa-miR-6715b-5p	48.8472	0.0325968	0.19914	0.163688	0.869977	0.976702
hsa-miR-520f-5p	33.8244	0.040309	0.25446	0.15841	0.874134	0.976702
hsa-miR-1247-5p	50.0563	-0.0610612	0.384219	-0.158923	0.873729	0.976702
hsa-miR-320d	15.7597	-0.036832	0.230114	-0.16006	0.872834	0.976702
hsa-miR-675-5p	9.16175	-0.0487202	0.278983	-0.174635	0.861366	0.976702
hsa-miR-625-5p	289.658	0.0479709	0.293396	0.163502	0.870123	0.976702
hsa-miR-1226-3p	78.158	0.0399245	0.247214	0.161498	0.871701	0.976702
hsa-miR-518f-3p	114.075	-0.0503109	0.282535	-0.17807	0.858668	0.976702
hsa-miR-1260a	14.6787	-0.0317899	0.197759	-0.160751	0.87229	0.976702
hsa-miR-1914-3p	9.44527	-0.0409377	0.245974	-0.166431	0.867817	0.976702
hsa-miR-124-3p	297.683	0.0417413	0.2442	0.170931	0.864278	0.976702
hsa-miR-520d-5p	105.938	0.0469877	0.273949	0.17152	0.863815	0.976702
hsa-miR-4709-5p	10.8741	-0.0418119	0.24688	-0.169361	0.865513	0.976702
hsa-miR-4778-3p	8.93119	0.0497993	0.294609	0.169035	0.865769	0.976702
hsa-miR-1976	18.1364	0.0338785	0.204466	0.165692	0.868399	0.976702
hsa-miR-4486	19.1919	-0.0585864	0.367499	-0.159419	0.873339	0.976702
hsa-miR-31-3p	15.9643	0.048822	0.299645	0.162933	0.870571	0.976702
hsa-miR-30e-5p	15964.6	-0.0433861	0.248246	-0.174771	0.86126	0.976702
hsa-miR-146a-5p	206.311	0.0473417	0.288831	0.163908	0.869803	0.976702
hsa-miR-1180-3p	786.284	-0.0311468	0.197476	-0.157725	0.874674	0.976702
hsa-miR-1292-5p	20.4289	-0.0395126	0.242333	-0.163051	0.870479	0.976702
hsa-miR-365a-5p	49.234	-0.0490073	0.311185	-0.157486	0.874862	0.976702
hsa-miR-675-3p	9.73477	-0.0353923	0.226426	-0.156308	0.87579	0.976843
hsa-miR-425-3p	30.5879	-0.0509921	0.330136	-0.154458	0.877249	0.977574
hsa-miR-519b-3p	49.471	-0.0480631	0.322724	-0.148929	0.881609	0.981536
hsa-miR-489-3p	126.657	-0.0481564	0.334508	-0.143962	0.885531	0.982979
hsa-miR-5586-3p	14.1275	0.0367094	0.256354	0.143198	0.886134	0.982979
hsa-miR-3074-5p	161.102	-0.0305526	0.210985	-0.144809	0.884862	0.982979
hsa-miR-652-3p	264.397	-0.0311061	0.214522	-0.145002	0.884709	0.982979
hsa-miR-4508	355.334	0.036065	0.261196	0.138077	0.89018	0.986569
hsa-miR-3065-5p	41.3577	-0.0290709	0.214174	-0.135735	0.892031	0.986824
hsa-miR-3158-3p	58.6235	-0.0287211	0.210535	-0.13642	0.891489	0.986824
hsa-miR-520h	150.45	0.0257986	0.269727	0.0956468	0.923801	0.987361
hsa-miR-548ah-5p	19.6846	0.0462832	0.374832	0.123477	0.901729	0.987361
hsa-miR-8084	37.2188	0.0312903	0.373565	0.0837613	0.933246	0.987361
hsa-miR-3648	33.1911	-0.0270666	0.264907	-0.102174	0.918618	0.987361
hsa-miR-1973	316.192	-0.0239485	0.355692	-0.0673294	0.946319	0.987361
hsa-miR-1909-3p	455.749	0.026812	0.402526	0.0666093	0.946893	0.987361
hsa-miR-6835-5p	216.374	-0.0165534	0.21232	-0.0779642	0.937857	0.987361
hsa-miR-3065-3p	56.5564	0.0183528	0.189484	0.0968569	0.92284	0.987361
hsa-miR-515-5p	2025.85	0.0240113	0.294178	0.0816219	0.934947	0.987361
hsa-miR-4731-5p	60.0535	0.0377209	0.29837	0.126423	0.899397	0.987361
hsa-miR-6780a-3p	21.9099	-0.0327111	0.310412	-0.10538	0.916075	0.987361
hsa-miR-5197-5p	10.9228	0.0239274	0.285726	0.0837425	0.933261	0.987361
hsa-miR-3200-5p	12.1063	-0.0256565	0.274381	-0.0935069	0.925501	0.987361
hsa-miR-1343-3p	24.5705	-0.0418858	0.335791	-0.124738	0.900731	0.987361
hsa-miR-653-5p	210.957	-0.0274897	0.348397	-0.0789035	0.937109	0.987361
hsa-miR-338-3p	56.7529	0.0227991	0.215141	0.105972	0.915604	0.987361
hsa-miR-625-3p	234.787	0.0346243	0.289544	0.119582	0.904814	0.987361
hsa-miR-5690	29.5771	-0.0238134	0.232954	-0.102224	0.918579	0.987361
hsa-miR-3691-5p	36.3919	-0.0220558	0.209507	-0.105275	0.916158	0.987361
hsa-miR-6846-5p	13.5554	0.0260492	0.246504	0.105675	0.915841	0.987361
hsa-miR-488-3p	46.7279	-0.0270886	0.326692	-0.0829178	0.933917	0.987361
hsa-miR-4668-3p	18.1385	0.0284489	0.279436	0.101808	0.918909	0.987361
hsa-miR-6729-5p	14.5878	-0.0378152	0.282285	-0.133961	0.893434	0.987361
hsa-miR-6774-5p	126.768	-0.0381871	0.339476	-0.112488	0.910436	0.987361
hsa-miR-551b-5p	13.4106	0.0412406	0.334598	0.123254	0.901906	0.987361
hsa-miR-4445-3p	86.3118	-0.028973	0.308615	-0.093881	0.925204	0.987361
hsa-miR-16-5p	26878.9	0.0202098	0.203199	0.0994584	0.920774	0.987361
hsa-miR-574-5p	198.656	0.0148225	0.220667	0.0671713	0.946445	0.987361
hsa-miR-4787-5p	47.4993	0.0287236	0.270933	0.106017	0.915569	0.987361
hsa-miR-1306-5p	16.8156	0.0193833	0.257556	0.0752586	0.940009	0.987361
hsa-miR-6852-5p	74.4636	-0.0225052	0.241562	-0.0931653	0.925772	0.987361
hsa-miR-3929	20.065	0.0166054	0.241438	0.0687768	0.945167	0.987361
hsa-miR-5685	14.166	-0.0204679	0.232478	-0.0880424	0.929843	0.987361
hsa-miR-6718-5p	9.65103	-0.0305923	0.263258	-0.116206	0.907489	0.987361
hsa-miR-4781-5p	20.0461	0.0243807	0.228919	0.106504	0.915183	0.987361
hsa-miR-769-5p	3957.45	-0.033601	0.273532	-0.122841	0.902233	0.987361
hsa-miR-6879-3p	22.2286	0.0400211	0.37704	0.106145	0.915467	0.987361
hsa-miR-3161	64.7693	0.0157901	0.240595	0.0656296	0.947673	0.987361
hsa-miR-454-3p	1974.63	0.0168781	0.236329	0.0714179	0.943065	0.987361
hsa-miR-455-3p	111.164	-0.0246754	0.281709	-0.0875916	0.930201	0.987361
hsa-miR-4527	43.5818	0.0221564	0.170107	0.13025	0.896369	0.987361
hsa-miR-3136-3p	14.3036	0.0328122	0.274299	0.119622	0.904783	0.987361
hsa-miR-2276-3p	8.66751	-0.0301882	0.290692	-0.103849	0.917289	0.987361
hsa-miR-4670-5p	17.6143	-0.0298904	0.351092	-0.0851355	0.932154	0.987361
hsa-miR-27a-3p	159.026	0.0240445	0.245504	0.0979392	0.921981	0.987361
hsa-miR-4792	178.17	0.0267294	0.337071	0.0792992	0.936795	0.987361
hsa-miR-3194-5p	141.363	-0.0263531	0.380927	-0.0691814	0.944845	0.987361
hsa-miR-6087	940.245	0.027487	0.256606	0.107118	0.914696	0.987361
hsa-miR-1911-3p	10.9649	-0.0163339	0.248976	-0.0656043	0.947693	0.987361
hsa-miR-192-5p	3169.71	-0.0213072	0.219652	-0.0970043	0.922723	0.987361
hsa-miR-1248	129.854	-0.0372768	0.307681	-0.121154	0.903569	0.987361
hsa-miR-510-5p	27.5147	-0.0220249	0.256527	-0.0858582	0.931579	0.987361
hsa-miR-342-5p	53.2193	-0.0174189	0.260933	-0.0667562	0.946776	0.987361
hsa-miR-4455	1445	0.0394319	0.299294	0.13175	0.895182	0.987361
hsa-miR-550a-3p	79.3969	-0.020166	0.186281	-0.108256	0.913793	0.987361
hsa-miR-148b-3p	2663.11	0.0164588	0.221297	0.0743743	0.940713	0.987361
hsa-miR-6499-3p	12.5168	-0.0191681	0.268323	-0.0714365	0.94305	0.987361
hsa-miR-190a-3p	10.1119	-0.026514	0.311708	-0.0850603	0.932213	0.987361
hsa-miR-4289	15.7613	0.0307687	0.286169	0.107519	0.914377	0.987361
hsa-miR-5010-3p	17.316	-0.0287348	0.226642	-0.126785	0.899111	0.987361
hsa-miR-6809-5p	113.454	0.022443	0.184034	0.12195	0.902939	0.987361
hsa-miR-603	11.062	0.0230039	0.25764	0.0892868	0.928854	0.987361
hsa-miR-429	263.776	0.0258715	0.305101	0.0847967	0.932423	0.987361
hsa-miR-6871-5p	8.66746	-0.024805	0.27829	-0.0891337	0.928976	0.987361
hsa-miR-95-3p	61.7939	-0.025314	0.217586	-0.11634	0.907383	0.987361
hsa-miR-26a-1-3p	11.4335	0.0198305	0.282534	0.0701879	0.944044	0.987361
hsa-miR-151b	22874.5	0.0129314	0.184011	0.0702748	0.943975	0.987361
hsa-miR-6868-5p	71.4728	0.0166152	0.256991	0.0646528	0.94845	0.987361
hsa-miR-4281	30.4962	-0.0337092	0.27585	-0.122201	0.90274	0.987361
hsa-miR-548as-3p	17.1248	-0.0162258	0.255356	-0.0635419	0.949335	0.987438
hsa-miR-4713-5p	12.3317	0.0143763	0.230495	0.0623715	0.950267	0.987564
hsa-miR-4787-3p	127.317	0.0152023	0.251847	0.0603633	0.951866	0.987782
hsa-miR-548at-5p	10.2895	-0.0167907	0.279511	-0.0600715	0.952099	0.987782
hsa-miR-4726-3p	19.6143	0.0152494	0.258396	0.0590157	0.95294	0.987813
hsa-miR-151a-5p	22865.4	0.0106628	0.183916	0.0579768	0.953767	0.98783
hsa-miR-378f	21.7848	0.011472	0.223225	0.0513921	0.959013	0.989897
hsa-miR-4732-3p	19.4311	-0.0121734	0.232154	-0.0524367	0.958181	0.989897
hsa-miR-3141	17.8099	-0.0159172	0.294072	-0.0541269	0.956834	0.989897
hsa-miR-302d-5p	3185.75	0.0104733	0.200672	0.0521909	0.958377	0.989897
hsa-miR-340-5p	3006.52	-0.0148063	0.31296	-0.0473106	0.962266	0.990666
hsa-miR-221-5p	1179.64	0.0103718	0.223654	0.0463744	0.963012	0.990666
hsa-miR-1270	148.868	0.010514	0.219856	0.0478224	0.961858	0.990666
hsa-miR-6893-3p	14.0956	0.0141636	0.291592	0.0485734	0.961259	0.990666
hsa-miR-4749-3p	9.875	0.0102072	0.229886	0.0444009	0.964585	0.991447
hsa-miR-197-3p	1308.56	0.00849946	0.22765	0.0373357	0.970217	0.991507
hsa-miR-548h-5p	18.5632	-0.0107331	0.262617	-0.0408696	0.9674	0.991507
hsa-miR-4654	9.70207	-0.00866178	0.253886	-0.0341168	0.972784	0.991507
hsa-miR-330-3p	91.7089	-0.00909256	0.256608	-0.0354336	0.971734	0.991507
hsa-miR-425-5p	2470.12	-0.007517	0.184033	-0.0408459	0.967419	0.991507
hsa-miR-4260	11.5564	0.00949106	0.255888	0.0370907	0.970413	0.991507
hsa-miR-548ay-5p	15.8827	0.00970409	0.247648	0.039185	0.968743	0.991507
hsa-miR-6078	19.3523	-0.0123067	0.340651	-0.0361271	0.971181	0.991507
hsa-miR-301a-3p	2460.05	-0.0114811	0.33038	-0.0347512	0.972278	0.991507
hsa-miR-4791	21.0993	0.0105987	0.253	0.0418922	0.966585	0.991507
hsa-miR-3182	100.313	-0.00802784	0.243182	-0.0330117	0.973665	0.991575
hsa-miR-129-2-3p	43.2415	-0.00822175	0.278054	-0.0295689	0.976411	0.991884
hsa-miR-7153-5p	15.4198	0.00798751	0.258924	0.0308489	0.97539	0.991884
hsa-miR-4775	24.0576	0.00665371	0.223229	0.0298067	0.976221	0.991884
hsa-miR-6739-3p	8.71478	0.00699128	0.267128	0.0261721	0.97912	0.992202
hsa-miR-5587-3p	10.5971	0.00679312	0.254079	0.0267363	0.97867	0.992202
hsa-miR-3916	14.438	0.00564499	0.216188	0.0261114	0.979168	0.992202
hsa-miR-335-3p	9482.86	-0.00502996	0.207476	-0.0242436	0.980658	0.992233
hsa-miR-2909	10.1176	0.00627667	0.261187	0.0240314	0.980828	0.992233
hsa-miR-548e-3p	64.4787	-0.00456164	0.212247	-0.0214922	0.982853	0.992633
hsa-miR-1252-3p	36.7461	0.00519066	0.232899	0.0222871	0.982219	0.992633
hsa-miR-659-3p	10.8984	-0.00630397	0.339673	-0.0185589	0.985193	0.993349
hsa-miR-501-3p	1465.25	-0.00499536	0.259396	-0.0192576	0.984636	0.993349
hsa-miR-148b-5p	264.797	0.00361819	0.24746	0.0146213	0.988334	0.995692
hsa-miR-3938	45.2382	0.00306776	0.226369	0.013552	0.989187	0.995727
hsa-miR-331-5p	31.4313	-0.00267174	0.234069	-0.0114143	0.990893	0.995798
hsa-miR-4762-3p	38.4525	0.00366657	0.310625	0.0118038	0.990582	0.995798
hsa-miR-301b-5p	11.4277	0.00318545	0.341219	0.00933552	0.992551	0.995822
hsa-miR-4717-3p	10.4996	-0.00288774	0.294624	-0.00980142	0.99218	0.995822
hsa-miR-4664-3p	43.8512	-0.00136094	0.18515	-0.00735045	0.994135	0.99659
hsa-miR-380-5p	9.46698	-0.00132874	0.390679	-0.00340112	0.997286	0.998927
hsa-miR-524-3p	66.7369	0.000376371	0.228817	0.00164485	0.998688	0.999043
hsa-miR-132-3p	47.2664	-0.000368693	0.307456	-0.00119917	0.999043	0.999043
hsa-miR-6887-3p	6.04035	-0.220203	0.287234	-0.766633	0.4433	NA
hsa-miR-6721-5p	2.26375	0.310514	0.350883	0.884951	0.376183	NA
hsa-miR-4524b-5p	6.65141	0.219605	0.304639	0.720869	0.47099	NA
hsa-miR-597-3p	3.75731	-0.0469566	0.337109	-0.139292	0.889219	NA
hsa-miR-1293	6.57376	0.153567	0.263386	0.583049	0.55986	NA
hsa-miR-651-3p	0.977876	-0.237317	0.40086	-0.592021	0.553836	NA
hsa-miR-6750-3p	8.07564	0.092747	0.246578	0.376137	0.706815	NA
hsa-miR-211-5p	8.39425	0.14036	0.297704	0.471476	0.637301	NA
hsa-miR-548p	2.06204	-0.259837	0.378321	-0.686817	0.492198	NA
hsa-miR-766-5p	2.85139	-0.180159	0.328728	-0.548048	0.583659	NA
hsa-miR-98-3p	0.033102	0.0765941	0.188626	0.406063	0.684696	NA
hsa-miR-4771	1.94284	0.0367382	0.378685	0.0970152	0.922714	NA
hsa-miR-4684-5p	2.63539	0.186284	0.349603	0.532845	0.594141	NA
hsa-miR-6827-5p	2.95518	0.187323	0.37461	0.500047	0.617042	NA
hsa-miR-3132	0.37487	0.10853	0.368069	0.294862	0.768099	NA
hsa-miR-644a	0.806062	0.368827	0.400232	0.921534	0.356772	NA
hsa-miR-4768-5p	6.05634	-0.0441469	0.276459	-0.159687	0.873128	NA
hsa-miR-3142	1.55326	-0.239636	0.379653	-0.631197	0.527912	NA
hsa-miR-6825-5p	4.15203	-0.363068	0.304022	-1.19422	0.232393	NA
hsa-miR-548a-5p	2.7606	-0.11345	0.360199	-0.314966	0.752787	NA
hsa-miR-6813-3p	2.65445	-0.0727763	0.348823	-0.208634	0.834734	NA
hsa-miR-3681-3p	3.31513	0.160314	0.326807	0.490546	0.623748	NA
hsa-miR-1537-5p	3.90614	-0.0480453	0.335832	-0.143063	0.88624	NA
hsa-miR-4714-5p	4.54447	-0.126899	0.293346	-0.432591	0.665312	NA
hsa-miR-1238-3p	4.9586	0.055201	0.288761	0.191165	0.848396	NA
hsa-miR-4432	1.59985	0.013553	0.383675	0.0353242	0.971821	NA
hsa-miR-495-5p	2.86887	-0.132112	0.341841	-0.386472	0.699147	NA
hsa-miR-1238-5p	0.516878	0.231569	0.395329	0.585762	0.558035	NA
hsa-miR-6839-5p	7.65059	0.390458	0.287338	1.35888	0.174184	NA
hsa-miR-7107-3p	3.91922	0.0773228	0.328764	0.235192	0.81406	NA
hsa-miR-6738-5p	5.66118	0.281327	0.308516	0.911871	0.361837	NA
hsa-miR-3118	1.5708	0.275596	0.38331	0.71899	0.472147	NA
hsa-miR-4307	4.84487	-0.144883	0.288865	-0.501559	0.615977	NA
hsa-miR-3670	3.07147	0.1818	0.339641	0.535271	0.592463	NA
hsa-miR-1179	8.56573	-0.0229573	0.294474	-0.0779604	0.93786	NA
hsa-miR-4477a	2.08261	-0.00307736	0.357439	-0.00860947	0.993131	NA
hsa-miR-639	2.0543	-0.0516304	0.361458	-0.142839	0.886417	NA
hsa-miR-4777-3p	5.60833	0.0606265	0.288105	0.210432	0.83333	NA
hsa-miR-196a-5p	168.706	0.855212	0.356531	2.3987	NA	NA
hsa-miR-5582-3p	4.89097	-0.891734	0.399705	-2.23098	0.0256826	NA
hsa-miR-3660	7.28736	0.309558	0.320252	0.966606	0.333741	NA
hsa-miR-6504-5p	0.309215	0.231798	0.333454	0.695141	0.486967	NA
hsa-miR-4756-3p	1.45206	-0.00692954	0.376144	-0.0184226	0.985302	NA
hsa-miR-4666a-5p	2.56895	0.100122	0.362045	0.276546	0.782129	NA
hsa-miR-127-5p	21.5988	-0.319704	0.397769	-0.803742	NA	NA
hsa-miR-6760-3p	5.42397	-0.0283004	0.304422	-0.0929642	0.925932	NA
hsa-miR-548au-3p	1.8069	0.408339	0.365792	1.11631	0.264288	NA
hsa-miR-5591-3p	2.46843	0.0347387	0.388326	0.0894576	0.928718	NA
hsa-miR-4720-5p	4.84297	0.516906	0.298737	1.7303	0.0835762	NA
hsa-miR-6514-5p	7.23988	0.3413	0.262822	1.2986	0.194082	NA
hsa-miR-7157-3p	3.79338	0.190995	0.314626	0.607054	0.543815	NA
hsa-miR-7156-5p	3.71997	0.0569239	0.359683	0.158261	0.874251	NA
hsa-miR-7154-5p	2.2817	-0.0151537	0.354887	-0.0427002	0.965941	NA
hsa-miR-224-3p	0.404723	-0.0317378	0.38616	-0.082188	0.934497	NA
hsa-miR-345-3p	5.33694	0.187606	0.315327	0.594957	0.551872	NA
hsa-miR-6768-3p	2.15764	0.19872	0.360952	0.550544	0.581946	NA
hsa-miR-4514	1.60351	0.427895	0.387092	1.10541	0.268983	NA
hsa-miR-4797-5p	4.12895	0.446167	0.299689	1.48877	0.136549	NA
hsa-miR-6814-3p	7.4976	0.193597	0.247463	0.782325	0.434023	NA
hsa-miR-3127-5p	6.08825	-0.281362	0.281392	-0.999894	0.317362	NA
hsa-miR-4793-5p	7.61562	-0.00754508	0.304781	-0.0247558	0.98025	NA
hsa-miR-122-3p	0.102167	-0.135269	0.19091	-0.708548	0.478605	NA
hsa-miR-7159-3p	0.425299	-0.147622	0.378894	-0.389612	0.696823	NA
hsa-miR-5001-5p	6.76112	0.10757	0.276556	0.388961	0.697305	NA
hsa-miR-300	1.91419	0.310298	0.368342	0.842417	0.399554	NA
hsa-miR-6757-5p	8.41946	-0.174023	0.321418	-0.541422	0.588217	NA
hsa-miR-4802-5p	5.41245	-0.47927	0.306318	-1.56462	0.117673	NA
hsa-miR-6882-5p	4.93914	0.147315	0.278547	0.52887	0.596896	NA
hsa-miR-590-5p	4.97009	-0.347756	0.322104	-1.07964	0.280304	NA
hsa-miR-5009-5p	5.86389	0.441686	0.285903	1.54488	0.122375	NA
hsa-miR-511-3p	1.90979	0.185893	0.365155	0.50908	0.610696	NA
hsa-miR-6739-5p	6.32209	-0.230802	0.298226	-0.773914	0.438982	NA
hsa-miR-557	14.4264	-0.907047	0.398331	-2.27712	NA	NA
hsa-miR-4677-5p	4.73392	0.174766	0.29366	0.595129	0.551757	NA
hsa-miR-6754-5p	2.5558	-0.11332	0.394309	-0.287389	0.773814	NA
hsa-miR-6769b-5p	5.96347	0.00517813	0.361247	0.0143341	0.988563	NA
hsa-miR-4704-5p	2.35643	0.0635503	0.392357	0.16197	0.871329	NA
hsa-miR-6074	7.29105	-0.471793	0.272557	-1.73099	0.0834542	NA
hsa-miR-4499	1.76849	0.263548	0.370966	0.710436	0.477434	NA
hsa-miR-662	0.777129	-0.0934961	0.400558	-0.233415	0.815439	NA
hsa-miR-200c-5p	4.43075	-0.159077	0.401589	-0.396119	0.692017	NA
hsa-miR-147a	1.69879	0.244322	0.387393	0.630683	0.528248	NA
hsa-miR-4261	3.08709	0.776779	0.322024	2.41218	0.0158576	NA
hsa-miR-4270	7.232	0.612428	0.318205	1.92463	0.0542754	NA
hsa-miR-6809-3p	6.06859	0.397307	0.282428	1.40676	0.159499	NA
hsa-miR-1302	3.72877	-0.00134538	0.316036	-0.00425705	0.996603	NA
hsa-miR-4736	1.26153	-0.0825086	0.382252	-0.215849	0.829106	NA
hsa-miR-450a-1-3p	0.389426	0.411201	0.37619	1.09307	0.274364	NA
hsa-miR-4538	5.1017	0.130599	0.343299	0.380424	0.703631	NA
hsa-miR-5093	0.975626	0.0815361	0.3981	0.204813	0.837718	NA
hsa-miR-376b-3p	22.316	-0.217593	0.35706	-0.609402	NA	NA
hsa-miR-4999-5p	4.77546	0.28776	0.322992	0.890918	0.372973	NA
hsa-miR-5589-5p	0.729595	-0.925837	0.399692	-2.31638	0.0205378	NA
hsa-miR-4649-3p	2.64518	0.163486	0.339333	0.481788	0.629957	NA
hsa-miR-3160-5p	3.81641	0.0913301	0.329103	0.277513	0.781387	NA
hsa-miR-4420	39.5451	-0.503125	0.396821	-1.26789	NA	NA
hsa-miR-3622a-3p	1.28971	-0.0793406	0.389956	-0.203461	0.838775	NA
hsa-miR-5195-3p	3.60383	-0.0460062	0.334495	-0.137539	0.890604	NA
hsa-miR-215-3p	1.76272	0.0306468	0.379221	0.0808151	0.935589	NA
hsa-miR-4690-3p	5.77521	-0.381306	0.308243	-1.23703	0.216076	NA
hsa-miR-134-5p	116.765	-0.364868	0.400486	-0.911063	NA	NA
hsa-miR-6786-3p	5.29131	0.549139	0.270817	2.02771	0.0425898	NA
hsa-miR-3166	1.64462	-0.0520876	0.370294	-0.140666	0.888134	NA
hsa-miR-3667-5p	1.04159	-0.981372	0.402919	-2.43566	0.0148648	NA
hsa-miR-432-5p	115.124	-0.264778	0.388841	-0.680942	NA	NA
hsa-miR-487b-3p	202.179	-0.0411037	0.391073	-0.105105	NA	NA
hsa-miR-8056	1.64366	0.135054	0.368741	0.366258	0.714173	NA
hsa-miR-5186	5.3248	0.163067	0.352988	0.461962	0.644109	NA
hsa-miR-4506	3.56446	0.0327189	0.348135	0.0939833	0.925122	NA
hsa-miR-218-2-3p	2.48003	-0.28881	0.35016	-0.824795	0.409488	NA
hsa-miR-5189-3p	5.28089	0.378921	0.286792	1.32124	0.186422	NA
hsa-miR-4671-5p	4.96641	-0.213501	0.295071	-0.72356	0.469336	NA
hsa-miR-6853-5p	1.21901	0.559241	0.388637	1.43898	0.150156	NA
hsa-miR-4496	3.82333	-0.353162	0.340491	-1.03722	0.299635	NA
hsa-miR-4278	5.95958	0.518364	0.313993	1.65087	0.0987642	NA
hsa-miR-4529-5p	4.09972	-0.23611	0.295694	-0.798496	0.424583	NA
hsa-miR-4322	2.48315	-0.405165	0.347176	-1.16703	0.243198	NA
hsa-miR-95-5p	3.02615	0.373416	0.347897	1.07335	0.283113	NA
hsa-miR-4287	1.06331	-0.13062	0.400797	-0.325901	0.744499	NA
hsa-miR-299-3p	33.884	-0.0675262	0.394858	-0.171014	NA	NA
hsa-miR-4759	3.1585	-0.393237	0.330728	-1.18901	0.234438	NA
hsa-miR-6836-5p	8.57275	0.347297	0.250611	1.3858	0.165808	NA
hsa-miR-521	5.72968	0.406262	0.334151	1.2158	0.22406	NA
hsa-miR-6842-3p	8.56423	0.0852264	0.286815	0.297148	0.766353	NA
hsa-miR-4493	4.54842	0.0492327	0.358906	0.137174	0.890893	NA
hsa-miR-513b-3p	1.7407	-0.272338	0.381531	-0.713803	0.475349	NA
hsa-miR-4713-3p	4.57256	0.214022	0.290729	0.736156	0.461636	NA
hsa-miR-4674	5.2027	0.234081	0.314731	0.743748	0.457029	NA
hsa-miR-3646	1.33438	0.393481	0.390169	1.00849	0.313219	NA
hsa-miR-133b	0.0855149	0.0242803	0.188867	0.128557	0.897708	NA
hsa-miR-1269a	6.3752	0.0164509	0.347779	0.0473026	0.962272	NA
hsa-miR-3193	1.23819	-0.692057	0.397272	-1.74202	0.0815041	NA
hsa-miR-1288-3p	2.78388	-0.164534	0.343752	-0.478641	0.632194	NA
hsa-miR-4680-5p	4.01695	-0.176767	0.308642	-0.572724	0.566832	NA
hsa-miR-6745	4.49845	0.0723398	0.319631	0.226322	0.820951	NA
hsa-miR-6733-5p	4.00897	0.789795	0.362847	2.17666	0.0295059	NA
hsa-miR-4641	2.76387	0.103729	0.340832	0.30434	0.760869	NA
hsa-miR-8089	5.44605	0.516419	0.317607	1.62597	0.103957	NA
hsa-miR-6792-5p	3.54052	-0.202649	0.335997	-0.603126	0.546425	NA
hsa-miR-4662a-3p	0.567656	-0.252583	0.398064	-0.634528	0.525736	NA
hsa-miR-298	1.15321	-0.0690564	0.391962	-0.176181	0.860152	NA
hsa-miR-6806-3p	5.24391	0.322289	0.277901	1.15973	0.246161	NA
hsa-miR-4748	1.63657	0.118672	0.382597	0.310175	0.756428	NA
hsa-miR-3680-5p	5.68381	0.00230563	0.280973	0.00820588	0.993453	NA
hsa-miR-758-3p	111.867	-0.18467	0.386977	-0.477212	NA	NA
hsa-miR-4637	1.51541	-0.360376	0.384629	-0.936944	0.348788	NA
hsa-miR-4435	5.70021	0.936168	0.31764	2.94727	0.00320598	NA
hsa-miR-6817-5p	3.42883	-0.0742052	0.402284	-0.18446	0.853653	NA
hsa-miR-122-5p	3.07217	0.0205656	0.364743	0.0563838	0.955036	NA
hsa-miR-205-3p	5.80515	-0.273667	0.310656	-0.880931	0.378355	NA
hsa-miR-568	2.24668	0.214628	0.354008	0.606281	0.544328	NA
hsa-miR-5088-3p	4.16857	0.337196	0.320736	1.05132	0.293112	NA
hsa-miR-664a-5p	8.09887	0.139595	0.305578	0.456822	0.647799	NA
hsa-miR-3976	1.05763	0.393607	0.399413	0.985462	0.324397	NA
hsa-miR-451b	1.6305	-1.00317	0.390943	-2.56603	0.0102869	NA
hsa-miR-508-3p	2.21204	-0.802319	0.387234	-2.07192	0.0382726	NA
hsa-miR-6766-3p	1.87135	0.251606	0.360897	0.697168	0.485698	NA
hsa-miR-3974	1.19439	0.311369	0.39259	0.793115	0.427711	NA
hsa-miR-1250-3p	4.65556	-0.164674	0.302404	-0.544551	0.586063	NA
hsa-let-7b-3p	0	NA	NA	NA	NA	NA
hsa-miR-185-3p	0.168072	-0.214323	0.224717	-0.953747	0.340212	NA
hsa-miR-7153-3p	4.01746	-0.279166	0.318928	-0.875325	0.381397	NA
hsa-miR-6867-5p	2.21059	-0.822076	0.358653	-2.29212	0.0218989	NA
hsa-miR-34b-3p	3.61726	-0.293734	0.312891	-0.938772	0.347848	NA
hsa-miR-6855-5p	5.23845	0.135394	0.326566	0.414598	0.678436	NA
hsa-miR-4697-3p	1.02123	-0.207244	0.398731	-0.51976	0.603231	NA
hsa-miR-1202	1.64111	-0.236552	0.376828	-0.627746	0.53017	NA
hsa-miR-3713	6.27474	0.119916	0.292782	0.409573	0.682119	NA
hsa-miR-3915	1.73154	0.472928	0.384385	1.23035	0.218566	NA
hsa-miR-320b	7.77286	0.53617	0.283189	1.89333	0.0583136	NA
hsa-miR-15a-3p	1.4522	-0.345405	0.384215	-0.898989	0.368659	NA
hsa-miR-4446-5p	1.71899	0.176495	0.365489	0.482902	0.629166	NA
hsa-miR-559	6.94035	-0.308625	0.291115	-1.06015	0.289078	NA
hsa-miR-4482-5p	5.45753	-0.604876	0.364292	-1.66042	0.0968306	NA
hsa-miR-3614-5p	6.2257	-0.575443	0.327236	-1.7585	0.0786628	NA
hsa-miR-6874-3p	1.70141	0.45395	0.371307	1.22257	0.221491	NA
hsa-miR-6779-5p	2.9486	0.247095	0.351493	0.702986	0.482064	NA
hsa-miR-548ax	3.4625	-0.576634	0.332941	-1.73194	0.0832837	NA
hsa-miR-507	1.46266	0.0216226	0.380275	0.0568606	0.954656	NA
hsa-miR-365b-5p	7.37356	0.306896	0.256698	1.19556	0.23187	NA
hsa-miR-4708-5p	4.01648	0.182946	0.343412	0.532731	0.59422	NA
hsa-miR-6762-5p	7.59273	-0.25543	0.291446	-0.876425	0.380799	NA
hsa-miR-4711-3p	2.56136	0.370535	0.364654	1.01613	0.309569	NA
hsa-miR-4659b-3p	3.25402	0.460741	0.321947	1.43111	0.152399	NA
hsa-miR-4655-5p	2.73529	-0.362314	0.339749	-1.06641	0.286236	NA
hsa-miR-631	3.45994	0.128765	0.329016	0.391363	0.695529	NA
hsa-miR-5010-5p	5.34202	0.00868551	0.276878	0.0313695	0.974975	NA
hsa-miR-6506-5p	1.4486	0.571964	0.393844	1.45226	0.14643	NA
hsa-miR-129-1-3p	0.509212	0.0627691	0.3946	0.15907	0.873614	NA
hsa-miR-5591-5p	1.44511	0.000336065	0.399376	0.000841474	0.999329	NA
hsa-miR-3191-3p	1.87942	-0.147798	0.379448	-0.389509	0.696899	NA
hsa-miR-6762-3p	5.1951	-0.34827	0.321033	-1.08484	0.277991	NA
hsa-miR-8059	0.803965	-0.446809	0.40178	-1.11207	0.266107	NA
hsa-miR-4768-3p	4.45559	0.298674	0.303728	0.983361	0.32543	NA
hsa-miR-8052	0.300645	-0.218896	0.363355	-0.602431	0.546887	NA
hsa-miR-4305	0.798378	-0.588451	0.402476	-1.46208	0.14372	NA
hsa-miR-4697-5p	4.63972	-0.599334	0.355858	-1.68419	0.0921444	NA
hsa-miR-3189-5p	1.23283	-0.214875	0.38978	-0.551273	0.581446	NA
hsa-miR-6743-3p	4.71336	0.0731246	0.291137	0.251169	0.801684	NA
hsa-miR-585-3p	4.54077	-0.47626	0.325438	-1.46345	0.143345	NA
hsa-miR-4427	0.692007	0.100753	0.401175	0.251146	0.801701	NA
hsa-miR-6070	5.97946	-0.0852011	0.284428	-0.299552	0.764519	NA
hsa-miR-3677-5p	2.547	-0.620543	0.355249	-1.74678	0.0806749	NA
hsa-miR-4709-3p	2.1457	-0.102363	0.359455	-0.284774	0.775817	NA
hsa-miR-7702	1.45124	-0.217803	0.388234	-0.561009	0.574791	NA
hsa-miR-6823-5p	5.0689	0.354793	0.303616	1.16856	0.242583	NA
hsa-miR-1203	7.91204	0.198492	0.329787	0.601879	0.547255	NA
hsa-miR-4633-3p	7.35879	-0.65193	0.362083	-1.8005	0.071782	NA
hsa-miR-5004-5p	8.08875	0.105951	0.271556	0.390163	0.696416	NA
hsa-miR-6843-3p	2.25687	0.283759	0.351706	0.806809	0.419777	NA
hsa-miR-623	0	NA	NA	NA	NA	NA
hsa-miR-4725-5p	1.33135	-0.100716	0.388286	-0.259385	0.795338	NA
hsa-miR-4744	1.80833	-0.390404	0.375602	-1.03941	0.298615	NA
hsa-miR-1253	7.25466	0.44929	0.310429	1.44732	0.147808	NA
hsa-miR-4453	1.65829	-0.497223	0.383531	-1.29643	0.194826	NA
hsa-miR-7150	7.35826	0.548374	0.303006	1.80978	0.0703301	NA
hsa-miR-920	2.67749	0.00734925	0.3328	0.0220831	0.982382	NA
hsa-miR-6500-3p	0.562289	0.125646	0.397465	0.316119	0.751912	NA
hsa-miR-4653-3p	1.59669	0.312787	0.398313	0.785279	0.43229	NA
hsa-miR-4790-3p	0.696511	0.159505	0.400505	0.39826	0.690438	NA
hsa-miR-513c-5p	0.869586	-0.131794	0.400495	-0.329078	0.742097	NA
hsa-miR-6878-5p	1.67845	0.770407	0.38452	2.00356	0.0451176	NA
hsa-miR-6759-5p	0.7415	0.596849	0.398557	1.49752	0.134257	NA
hsa-miR-4536-5p	0.0721392	0.0219354	0.188863	0.116144	0.907538	NA
hsa-miR-130a-5p	2.1884	-0.0406974	0.350229	-0.116202	0.907492	NA
hsa-miR-6512-5p	3.83971	0.182852	0.354138	0.516331	0.605624	NA
hsa-miR-562	4.29383	0.420755	0.30348	1.38643	0.165614	NA
hsa-miR-133a-5p	0.661762	0.212527	0.392051	0.542092	0.587755	NA
hsa-miR-3156-3p	7.48283	0.342666	0.251434	1.36285	0.17293	NA
hsa-miR-1231	4.37582	-0.444058	0.308165	-1.44097	0.149593	NA
hsa-miR-4692	0.929524	0.13328	0.398152	0.334748	0.737815	NA
hsa-miR-504-3p	7.44879	0.182193	0.269826	0.675224	0.499533	NA
hsa-miR-10a-3p	0.223382	0.348406	0.240107	1.45104	0.146768	NA
hsa-miR-4468	3.28276	0.418567	0.324508	1.28985	0.197103	NA
hsa-miR-3165	4.31245	0.366326	0.304357	1.20361	0.228742	NA
hsa-miR-3606-3p	3.3431	0.530514	0.313461	1.69244	0.0905623	NA
hsa-miR-4719	1.05528	-0.308678	0.398356	-0.774878	0.438412	NA
hsa-miR-323b-3p	51.781	-0.0617157	0.396691	-0.155576	NA	NA
hsa-miR-4526	1.20586	-0.219634	0.399584	-0.549657	0.582555	NA
hsa-miR-548g-5p	1.3086	0.288101	0.385058	0.748202	0.454338	NA
hsa-miR-635	5.57588	-0.458032	0.328172	-1.39571	0.162802	NA
hsa-miR-6730-5p	2.04763	0.589259	0.353257	1.66807	0.095301	NA
hsa-miR-4761-3p	3.7273	-0.131748	0.315069	-0.418157	0.675832	NA
hsa-miR-6800-3p	3.56141	0.344094	0.316119	1.08849	0.276377	NA
hsa-miR-579-3p	4.80402	0.219384	0.306055	0.716812	0.47349	NA
hsa-miR-593-3p	2.25471	0.111833	0.375255	0.298018	0.765689	NA
hsa-miR-374c-5p	0.967289	0.128072	0.399236	0.320792	0.748368	NA
hsa-miR-3064-3p	1.87759	0.184114	0.374093	0.492163	0.622604	NA
hsa-miR-4733-3p	3.2305	0.616798	0.33832	1.82312	0.0682853	NA
hsa-miR-1250-5p	8.39875	0.116919	0.261168	0.447676	0.654387	NA
hsa-miR-632	2.24743	-0.19492	0.350028	-0.556872	0.577615	NA
hsa-miR-142-3p	1.24842	0.318607	0.400908	0.794712	0.426781	NA
hsa-miR-490-5p	3.49126	0.0829706	0.318517	0.26049	0.794486	NA
hsa-miR-3689d	0.338267	-0.322489	0.36341	-0.887396	0.374866	NA
hsa-miR-216a-3p	6.17496	0.757114	0.399404	1.89561	0.0580114	NA
hsa-miR-4657	1.26064	0.283265	0.38585	0.734132	0.462868	NA
hsa-miR-570-5p	0.998824	-0.496428	0.399985	-1.24112	0.214562	NA
hsa-miR-138-1-3p	0.338047	0.259758	0.346304	0.750088	0.453202	NA
hsa-miR-381-5p	4.83117	0.0053212	0.361555	0.0147175	0.988258	NA
hsa-miR-128-2-5p	1.08734	0.453443	0.393602	1.15204	0.249307	NA
hsa-miR-6783-5p	8.1767	0.352265	0.277659	1.2687	0.20455	NA
hsa-miR-8063	3.10212	-0.0135907	0.356593	-0.0381126	0.969598	NA
hsa-miR-4699-3p	3.19565	0.359509	0.339922	1.05762	0.290228	NA
hsa-miR-6882-3p	6.41511	0.0858364	0.259586	0.330666	0.740897	NA
hsa-miR-487b-5p	1.82538	-0.509298	0.383092	-1.32944	0.183703	NA
hsa-miR-548s	7.55996	0.00813275	0.282505	0.028788	0.977034	NA
hsa-miR-3689a-3p	0.581087	0.737191	0.391604	1.88249	0.0597693	NA
hsa-miR-2053	7.36476	0.86533	0.35747	2.4207	0.0154905	NA
hsa-miR-449c-5p	6.9758	0.0635484	0.370644	0.171454	0.863867	NA
hsa-miR-3940-5p	5.27667	-0.311765	0.306319	-1.01778	0.308783	NA
hsa-miR-7853-5p	2.99627	-0.563503	0.337646	-1.66892	0.0951339	NA
hsa-miR-24-1-5p	4.58223	-0.119188	0.342099	-0.348402	0.727539	NA
hsa-miR-3692-5p	2.78569	0.333904	0.335496	0.995255	0.319612	NA
hsa-miR-7162-5p	6.66945	-0.438058	0.28734	-1.52452	0.127378	NA
hsa-miR-4509	1.18504	0.0286393	0.391533	0.0731465	0.94169	NA
hsa-miR-4318	5.74393	0.139707	0.289909	0.481898	0.629879	NA
hsa-miR-548ae-3p	2.66786	-0.289547	0.337959	-0.856751	0.391583	NA
hsa-miR-1185-2-3p	6.57882	-0.242397	0.360152	-0.673041	NA	NA
hsa-miR-4670-3p	5.42479	-0.408527	0.400429	-1.02022	0.307623	NA
hsa-miR-383-5p	2.05029	0.39692	0.363437	1.09213	0.274776	NA
hsa-miR-1183	1.76604	0.556745	0.367645	1.51435	0.129936	NA
hsa-miR-6816-3p	3.69759	0.189103	0.315993	0.598442	0.549545	NA
hsa-miR-548g-3p	1.73507	-0.136801	0.376679	-0.363177	0.716472	NA
hsa-miR-1287-3p	5.62194	-0.119017	0.271617	-0.438177	0.661258	NA
hsa-miR-585-5p	2.76309	0.151999	0.344536	0.441169	0.65909	NA
hsa-miR-548v	3.30008	0.0348077	0.333235	0.104454	0.916809	NA
hsa-miR-503-5p	2.93621	0.0592366	0.346508	0.170953	0.864261	NA
hsa-miR-4330	2.53134	-0.507631	0.374501	-1.35549	0.175263	NA
hsa-miR-554	4.80283	-0.430829	0.321654	-1.33942	0.180435	NA
hsa-miR-3922-3p	4.69157	0.399115	0.303367	1.31562	0.188303	NA
hsa-miR-3150a-3p	2.11662	0.2723	0.347312	0.78402	0.433028	NA
hsa-miR-3191-5p	4.52671	-0.453505	0.317154	-1.42992	0.15274	NA
hsa-miR-6088	4.47961	0.223952	0.313481	0.714405	0.474977	NA
hsa-miR-2355-3p	7.36785	-0.179619	0.267103	-0.672472	0.501283	NA
hsa-miR-939-5p	4.85458	-0.155813	0.30556	-0.509926	0.610103	NA
hsa-miR-541-3p	4.7203	-0.238234	0.403201	-0.590856	0.554617	NA
hsa-miR-4795-3p	0.381421	0.629312	0.374951	1.67839	0.0932716	NA
hsa-miR-4752	2.92716	-0.364642	0.339468	-1.07416	0.282752	NA
hsa-miR-4680-3p	2.02361	-0.436609	0.376185	-1.16062	0.245796	NA
hsa-miR-181d-3p	149.701	-0.397436	0.388043	-1.02421	NA	NA
hsa-miR-4783-3p	3.90754	0.232289	0.301172	0.771285	0.440538	NA
hsa-miR-1262	2.48845	0.340156	0.389572	0.873154	0.382579	NA
hsa-miR-591	2.2012	0.303076	0.363152	0.834571	0.403959	NA
hsa-miR-3591-5p	1.36847	0.143751	0.387922	0.370567	0.71096	NA
hsa-miR-4650-3p	2.13361	0.565121	0.374818	1.50772	0.131626	NA
hsa-miR-889-3p	269.383	-0.173244	0.395324	-0.438233	NA	NA
hsa-miR-6747-5p	4.9555	0.264692	0.302239	0.875771	0.381154	NA
hsa-miR-4524b-3p	4.40574	0.288234	0.339426	0.849182	0.39578	NA
hsa-miR-1207-5p	2.24639	0.0793677	0.356327	0.222738	0.823739	NA
hsa-miR-1915-5p	8.18134	-0.0434486	0.336336	-0.129182	0.897213	NA
hsa-miR-4776-3p	5.594	-0.151087	0.301499	-0.50112	0.616287	NA
hsa-miR-642b-3p	7.49444	-0.557368	0.283905	-1.96322	0.0496209	NA
hsa-miR-4255	3.36431	-0.323843	0.349276	-0.927182	0.353832	NA
hsa-miR-3198	4.63745	0.0607227	0.356524	0.170319	0.864759	NA
hsa-miR-5687	1.70222	0.288366	0.394885	0.730255	0.465234	NA
hsa-miR-4758-5p	2.78096	0.306888	0.343512	0.893384	0.371652	NA
hsa-miR-6776-3p	8.54678	0.19334	0.259806	0.744173	0.456772	NA
hsa-miR-6732-3p	3.99961	0.461374	0.299968	1.53807	0.12403	NA
hsa-miR-5586-5p	1.13055	-0.0892174	0.396467	-0.225031	0.821955	NA
hsa-miR-223-5p	0.810901	-0.412514	0.402474	-1.02494	0.30539	NA
hsa-miR-206	1.04961	-0.00710234	0.402702	-0.0176367	0.985929	NA
hsa-miR-1468-3p	2.24279	-0.103568	0.373071	-0.277609	0.781313	NA
hsa-miR-668-5p	6.78043	0.0873227	0.270066	0.323338	0.746439	NA
hsa-miR-5004-3p	4.61764	0.246144	0.283116	0.869411	0.384622	NA
hsa-miR-411-5p	1973.51	-0.143996	0.395629	-0.363966	NA	NA
hsa-miR-4712-5p	4.89983	-0.25078	0.292649	-0.856929	0.391484	NA
hsa-let-7e-3p	4.88578	0.061553	0.371023	0.165901	0.868235	NA
hsa-miR-5583-3p	4.02099	-0.573994	0.36023	-1.59341	0.111068	NA
hsa-miR-3122	2.28672	0.203072	0.365016	0.556337	0.57798	NA
hsa-miR-4263	6.39778	0.0858189	0.315668	0.271865	0.785726	NA
hsa-miR-4312	1.74715	0.271562	0.365602	0.742781	0.457614	NA
hsa-miR-1178-3p	0.87554	0.0418822	0.398578	0.105079	0.916313	NA
hsa-miR-4471	6.44209	0.348171	0.309482	1.12501	0.260584	NA
hsa-miR-6884-5p	0.843888	0.539165	0.40123	1.34378	0.17902	NA
hsa-miR-6851-5p	7.02659	0.0703574	0.26403	0.266474	0.789874	NA
hsa-miR-3129-3p	6.69847	0.141251	0.26455	0.53393	0.59339	NA
hsa-miR-3179	5.74124	-0.288474	0.279867	-1.03076	0.302655	NA
hsa-miR-3689b-3p	0.757968	0.913779	0.39794	2.29627	0.0216602	NA
hsa-miR-548al	7.06114	0.347809	0.261556	1.32977	0.183595	NA
hsa-miR-6795-3p	6.62547	0.062487	0.277601	0.225096	0.821904	NA
hsa-miR-492	0.872217	0.152592	0.400978	0.38055	0.703537	NA
hsa-miR-6865-5p	0.627636	-0.35255	0.399042	-0.883491	0.376971	NA
hsa-miR-6832-5p	2.74004	-0.0533903	0.331347	-0.161131	0.87199	NA
hsa-miR-548bb-5p	3.71275	0.154163	0.312485	0.493345	0.621769	NA
hsa-miR-369-5p	70.6084	-0.0641077	0.375762	-0.170607	NA	NA
hsa-miR-4660	1.89743	0.378043	0.37385	1.01122	0.311913	NA
hsa-miR-4804-3p	2.41903	0.404823	0.34797	1.16339	0.244673	NA
hsa-miR-6757-3p	3.52003	-0.217633	0.330909	-0.657682	0.510742	NA
hsa-miR-4755-5p	3.22605	0.170491	0.337962	0.504467	0.613933	NA
hsa-miR-3137	1.99188	-0.013733	0.362114	-0.0379245	0.969748	NA
hsa-miR-3652	5.27262	0.0934369	0.268496	0.348001	0.72784	NA
hsa-miR-4766-3p	3.255	0.0311147	0.346642	0.0897605	0.928478	NA
hsa-miR-4740-5p	1.27222	0.497092	0.395347	1.25736	0.208624	NA
hsa-miR-6075	1558.47	0.928857	0.40373	2.30069	NA	NA
hsa-miR-214-5p	6.0363	1.17048	0.34036	3.43893	0.000584014	NA
hsa-miR-3190-5p	2.65077	-0.0504727	0.343221	-0.147056	0.883088	NA
hsa-miR-6076	0.445971	0.512717	0.392708	1.30559	0.191691	NA
hsa-miR-139-3p	0.686456	-0.146652	0.400249	-0.366403	0.714064	NA
hsa-miR-544a	0.520974	-0.177323	0.389382	-0.455395	0.648825	NA
hsa-miR-581	3.68846	0.12364	0.325593	0.379738	0.70414	NA
hsa-miR-511-5p	2.50761	-0.242579	0.338487	-0.716659	0.473585	NA
hsa-miR-4500	0.367261	0.0575889	0.364472	0.158006	0.874452	NA
hsa-miR-4676-3p	3.10883	0.31113	0.337093	0.922981	0.356017	NA
hsa-miR-4296	2.76175	0.14437	0.331475	0.43554	0.663171	NA
hsa-miR-3666	1.31541	0.0189074	0.389697	0.0485183	0.961303	NA
hsa-miR-3134	2.25553	0.405385	0.377082	1.07506	0.282349	NA
hsa-miR-548ba	4.6743	0.143852	0.351353	0.409424	0.682228	NA
hsa-miR-619-3p	0.95953	0.183791	0.400285	0.459149	0.646127	NA
hsa-miR-378j	8.37566	-0.0777225	0.279644	-0.277934	0.781063	NA
hsa-miR-1-3p	5.73578	0.692918	0.344597	2.0108	0.0443462	NA
hsa-miR-597-5p	3.74927	0.21514	0.313858	0.685468	0.493049	NA
hsa-miR-8085	2.34625	0.525966	0.359234	1.46413	0.143158	NA
hsa-miR-2682-5p	5.54687	0.171705	0.352985	0.486437	0.626658	NA
hsa-miR-548d-5p	7.05216	0.0422326	0.295657	0.142843	0.886414	NA
hsa-miR-1247-3p	6.16327	-0.0870634	0.334272	-0.260457	0.794511	NA
hsa-miR-5187-5p	2.50344	-0.501624	0.347566	-1.44325	0.148951	NA
hsa-miR-323a-3p	216.775	-0.365149	0.40371	-0.904484	NA	NA
hsa-miR-4298	2.93899	0.307938	0.3209	0.959609	0.337252	NA
hsa-miR-1256	2.68394	0.117639	0.339048	0.346968	0.728615	NA
hsa-miR-4425	3.09294	0.672877	0.326561	2.06049	0.0393513	NA
hsa-miR-7151-5p	4.33599	0.480383	0.305314	1.57341	0.115625	NA
hsa-miR-372-5p	5.4851	0.926463	0.394526	2.34829	0.0188597	NA
hsa-miR-7515	1.35975	0.0266009	0.389221	0.0683438	0.945512	NA
hsa-miR-6790-5p	0.854802	-0.262184	0.401507	-0.652999	0.513757	NA
hsa-miR-1277-3p	0.776189	-0.460529	0.393579	-1.17011	0.241958	NA
hsa-miR-640	133.7	-0.619629	0.368872	-1.67979	NA	NA
hsa-miR-3194-3p	1.40581	0.275819	0.377417	0.730807	0.464897	NA
hsa-miR-6829-5p	3.61712	0.0783832	0.328485	0.23862	0.8114	NA
hsa-miR-211-3p	2.93266	-0.0142888	0.321904	-0.0443883	0.964595	NA
hsa-miR-655-5p	1.96368	-0.190973	0.393938	-0.484779	0.627833	NA
hsa-miR-4766-5p	1.20071	0.374718	0.395864	0.946582	0.343852	NA
hsa-miR-5580-5p	0.489386	-0.404995	0.374117	-1.08253	0.279015	NA
hsa-miR-6822-3p	1.02419	-0.286393	0.393221	-0.728325	0.466414	NA
hsa-miR-494-3p	84.4253	-0.134325	0.403718	-0.332721	NA	NA
hsa-miR-6824-5p	2.39046	-0.461077	0.353652	-1.30376	0.192316	NA
hsa-let-7f-1-3p	0.0590468	0.135116	0.188808	0.715626	0.474223	NA
hsa-miR-6129	2.87677	0.303034	0.319258	0.949184	0.342527	NA
hsa-miR-3148	2.3739	0.00205531	0.368547	0.00557679	0.99555	NA
hsa-miR-5006-5p	5.09799	0.230621	0.325575	0.70835	0.478728	NA
hsa-miR-6821-5p	6.88563	0.216549	0.273274	0.792424	0.428113	NA
hsa-miR-6840-3p	6.07071	0.240172	0.292276	0.821728	0.411232	NA
hsa-miR-6888-5p	0.861932	-0.102184	0.401795	-0.254319	0.799249	NA
hsa-miR-6773-3p	5.72233	-0.272809	0.286798	-0.951222	0.341492	NA
hsa-miR-33b-3p	1.69653	-0.858938	0.376008	-2.28436	0.0223502	NA
hsa-miR-600	3.84616	0.175138	0.333402	0.525307	0.59937	NA
hsa-miR-3202	1.21878	0.0105947	0.392848	0.0269689	0.978485	NA
hsa-miR-4640-3p	5.54275	-0.0287644	0.28047	-0.102558	0.918314	NA
hsa-miR-4767	5.07661	0.254511	0.273881	0.929273	0.352748	NA
hsa-miR-4288	3.29385	-0.00407305	0.327583	-0.0124336	0.99008	NA
hsa-miR-4659b-5p	3.69636	0.180673	0.317473	0.569099	0.569289	NA
hsa-miR-6802-5p	37.1297	-1.05652	0.385554	-2.74026	NA	NA
hsa-miR-6728-5p	2.30526	-0.42714	0.360173	-1.18593	0.235649	NA
hsa-miR-6769b-3p	8.17542	0.270407	0.234318	1.15402	0.248494	NA
hsa-miR-6761-5p	5.14319	-0.369914	0.290219	-1.2746	0.202449	NA
hsa-miR-4700-3p	3.42863	0.199403	0.356674	0.559061	0.57612	NA
hsa-miR-1224-3p	6.00553	0.293566	0.269002	1.09132	0.275133	NA
hsa-miR-3663-3p	3.41025	-0.641428	0.333253	-1.92475	0.0542609	NA
hsa-miR-4754	4.54668	-0.0774207	0.298265	-0.25957	0.795195	NA
hsa-miR-6085	6.03692	-0.0351105	0.273022	-0.128599	0.897675	NA
hsa-miR-6750-5p	3.48206	0.130991	0.316407	0.413995	0.678878	NA
hsa-miR-4796-3p	1.29161	0.0174043	0.384586	0.0452546	0.963904	NA
hsa-miR-3977	5.17966	0.43877	0.323327	1.35705	0.174766	NA
hsa-miR-3680-3p	0.71759	0.0460755	0.398112	0.115735	0.907863	NA
hsa-miR-4729	1.04212	0.381273	0.392172	0.972208	0.330947	NA
hsa-miR-4638-5p	2.4859	0.18261	0.367971	0.496262	0.61971	NA
hsa-miR-6875-3p	5.58667	0.256324	0.28844	0.888656	0.374188	NA
hsa-miR-198	1.18693	0.251897	0.394496	0.63853	0.523129	NA
hsa-miR-4753-5p	3.66751	0.848615	0.3101	2.73658	0.00620807	NA
hsa-miR-145-3p	0.614627	0.208469	0.395104	0.527632	0.597755	NA
hsa-miR-6814-5p	1.69457	-0.0402648	0.374264	-0.107584	0.914326	NA
hsa-miR-6082	234.761	-0.670018	0.401317	-1.66955	NA	NA
hsa-miR-3619-3p	2.61699	-0.100166	0.333292	-0.300536	0.763768	NA
hsa-miR-7844-5p	0.424188	-0.118559	0.378664	-0.313097	0.754207	NA
hsa-miR-612	1.74084	0.928276	0.366866	2.53028	0.011397	NA
hsa-miR-3686	3.81186	-0.135661	0.328048	-0.413542	0.67921	NA
hsa-miR-6818-3p	4.0705	0.222885	0.3002	0.742453	0.457813	NA
hsa-miR-509-5p	1.29478	-0.400382	0.385914	-1.03749	0.299507	NA
hsa-miR-508-5p	0.314425	-0.575117	0.359803	-1.59842	0.109949	NA
hsa-miR-6835-3p	3.29902	0.508138	0.318706	1.59438	0.110852	NA
hsa-miR-4795-5p	5.84892	0.171725	0.268637	0.639245	0.522664	NA
hsa-miR-1295b-5p	3.74666	-0.472136	0.332651	-1.41931	0.155808	NA
hsa-miR-1229-3p	7.91485	-0.15173	0.284531	-0.533265	0.59385	NA
hsa-miR-6865-3p	5.44481	0.247	0.307488	0.803283	0.421811	NA
hsa-miR-4708-3p	7.92749	0.291044	0.268568	1.08369	0.278503	NA
hsa-miR-3529-5p	3.91424	0.715025	0.325922	2.19385	0.0282462	NA
hsa-miR-4474-5p	2.94475	0.223744	0.359742	0.621955	0.533971	NA
hsa-miR-5681a	0.380342	-0.280245	0.367341	-0.762901	0.445523	NA
hsa-miR-6895-3p	24.2539	-0.393734	0.28664	-1.37362	NA	NA
hsa-miR-656-3p	21.963	-0.0105816	0.390577	-0.0270922	NA	NA
hsa-miR-6759-3p	3.25955	-0.0937871	0.331521	-0.2829	0.777254	NA
hsa-miR-3671	1.80931	0.354998	0.375378	0.945708	0.344298	NA
hsa-miR-3197	7.5852	0.0624833	0.278255	0.224554	0.822326	NA
hsa-miR-203a-5p	0.0973352	-0.131443	0.19045	-0.69017	0.490087	NA
hsa-miR-208a-3p	1.08985	-0.524853	0.402397	-1.30432	0.192126	NA
hsa-miR-654-5p	29.6214	-0.132547	0.361248	-0.366913	NA	NA
hsa-miR-6508-5p	0.64399	0.0142195	0.400485	0.0355058	0.971676	NA
hsa-miR-548aq-3p	8.51155	-0.531094	0.349031	-1.52162	0.128103	NA
hsa-miR-6797-5p	6.56646	0.417737	0.332463	1.25649	0.208937	NA
hsa-miR-6717-5p	3.76444	-0.854064	0.332434	-2.56912	0.0101957	NA
hsa-miR-6788-3p	5.88765	0.198428	0.264954	0.748916	0.453908	NA
hsa-miR-6833-5p	0.870316	-0.50148	0.401934	-1.24767	0.212153	NA
hsa-miR-6801-3p	4.61942	0.592927	0.297575	1.99253	0.0463134	NA
hsa-miR-3714	2.49338	0.478442	0.368898	1.29695	0.194649	NA
hsa-miR-1236-3p	4.72804	-0.353714	0.305104	-1.15932	0.246324	NA
hsa-miR-4798-3p	1.75683	0.238345	0.380727	0.626026	0.531298	NA
hsa-miR-410-3p	1427.56	-0.174089	0.397662	-0.437781	NA	NA
hsa-miR-4328	2.3808	-0.0161809	0.34879	-0.0463916	0.962998	NA
hsa-miR-4539	5.58093	0.195419	0.333835	0.585376	0.558295	NA
hsa-miR-4740-3p	3.82632	-0.0583163	0.315892	-0.184608	0.853536	NA
hsa-miR-6851-3p	2.1859	-0.204309	0.352298	-0.579932	0.561961	NA
hsa-miR-4693-5p	3.06753	0.210456	0.367812	0.572184	0.567198	NA
hsa-miR-409-5p	271.718	-0.629394	0.381792	-1.64852	NA	NA
hsa-miR-3934-3p	6.26947	-0.388433	0.278122	-1.39663	0.162525	NA
hsa-miR-3614-3p	3.48738	0.139921	0.327018	0.427868	0.668747	NA
hsa-miR-4723-3p	1.67649	0.181811	0.371853	0.488932	0.62489	NA
hsa-miR-6847-3p	1.63433	-0.203182	0.378222	-0.537204	0.591127	NA
hsa-miR-4800-5p	7.77795	-0.0599898	0.260935	-0.229903	0.818167	NA
hsa-miR-196b-3p	2.14874	0.282604	0.374945	0.753722	0.451016	NA
hsa-miR-4436b-3p	2.00265	0.339952	0.355719	0.955675	0.339236	NA
hsa-miR-8064	0.788637	-0.239586	0.401753	-0.596351	0.550941	NA
hsa-miR-566	4.22026	0.0679168	0.316687	0.21446	0.830188	NA
hsa-miR-6515-3p	7.58599	0.149245	0.244185	0.611195	0.54107	NA
hsa-miR-4684-3p	6.1175	-0.845135	0.372974	-2.26594	0.0234553	NA
hsa-miR-6838-5p	3.7645	0.460468	0.304814	1.51065	0.130877	NA
hsa-miR-8058	5.56775	0.058405	0.40274	0.145019	0.884696	NA
hsa-miR-5580-3p	0.802068	-0.270094	0.401033	-0.673497	0.500631	NA
hsa-miR-645	4.34286	0.618108	0.297292	2.07913	0.0376054	NA
hsa-miR-4481	4.79405	-0.339086	0.401323	-0.84492	0.398155	NA
hsa-miR-7-2-3p	3.63566	0.513841	0.330763	1.5535	0.120303	NA
hsa-miR-3923	0.502061	0.00757314	0.39443	0.0192002	0.984681	NA
hsa-miR-5002-3p	3.24261	0.0306263	0.322054	0.0950968	0.924238	NA
hsa-miR-4529-3p	1.36864	-0.211297	0.395686	-0.534001	0.593341	NA
hsa-miR-4789-5p	1.21983	-0.658467	0.393457	-1.67354	0.0942206	NA
hsa-miR-3126-3p	1.63785	-0.41677	0.380117	-1.09642	0.272893	NA
hsa-miR-3143	0.645463	-0.255708	0.400885	-0.637859	0.523565	NA
hsa-miR-4757-3p	7.25792	-0.0848703	0.317785	-0.267068	0.789417	NA
hsa-miR-5187-3p	2.56294	0.329018	0.344265	0.955714	0.339217	NA
hsa-miR-5692b	0.567608	-0.39561	0.383352	-1.03198	0.302083	NA
hsa-miR-1288-5p	2.07196	0.213417	0.356526	0.598601	0.549439	NA
hsa-miR-4265	1.39378	0.0987351	0.400233	0.246694	0.805145	NA
hsa-miR-4452	3.40725	0.0339471	0.356242	0.0952924	0.924083	NA
hsa-miR-8066	2.854	0.281593	0.340302	0.827479	0.407966	NA
hsa-miR-6791-3p	6.13015	0.503659	0.282284	1.78423	0.0743864	NA
hsa-miR-6841-5p	5.0207	0.312285	0.296636	1.05276	0.292453	NA
hsa-miR-4679	1.77338	0.347402	0.366175	0.94873	0.342758	NA
hsa-miR-6890-5p	2.4325	0.643718	0.349955	1.83943	0.0658518	NA
hsa-miR-4731-3p	5.86304	0.73873	0.287717	2.56756	0.0102416	NA
hsa-miR-6746-5p	7.63156	0.0954421	0.257888	0.370091	0.711315	NA
hsa-miR-519e-5p	5.43547	-0.111162	0.318793	-0.348695	0.727318	NA
hsa-miR-6782-5p	6.64426	-0.208707	0.284538	-0.733495	0.463257	NA
hsa-miR-6510-5p	7.1072	-0.133835	0.271108	-0.49366	0.621546	NA
hsa-miR-4280	1.1793	0.376412	0.400632	0.939544	0.347452	NA
hsa-miR-5008-3p	3.07282	0.242197	0.317681	0.76239	0.445828	NA
hsa-miR-6893-5p	4.09223	0.160986	0.303057	0.531206	0.595276	NA
hsa-miR-6734-5p	4.69764	0.184701	0.293433	0.629449	0.529055	NA
hsa-miR-449c-3p	0.439759	-0.480136	0.380165	-1.26297	0.206601	NA
hsa-miR-4518	1.88475	-0.212766	0.37618	-0.565595	0.571669	NA
hsa-miR-188-3p	4.68907	-0.100203	0.344408	-0.290943	0.771095	NA
hsa-miR-411-3p	2.08151	-0.107406	0.348144	-0.308511	0.757693	NA
hsa-miR-6800-5p	1.43116	-0.288123	0.393465	-0.732271	0.464003	NA
hsa-miR-4638-3p	8.14895	-0.0400473	0.257077	-0.155779	0.876207	NA
hsa-miR-4779	5.26915	-0.00241996	0.297851	-0.00812473	0.993517	NA
hsa-miR-6730-3p	2.21796	-0.332062	0.360326	-0.921559	0.356759	NA
hsa-miR-3121-3p	3.00331	0.0437609	0.330628	0.132357	0.894702	NA
hsa-miR-4311	2.9339	-0.138445	0.353731	-0.391385	0.695512	NA
hsa-miR-4295	0.725229	-0.158242	0.401514	-0.394113	0.693498	NA
hsa-miR-6744-5p	0.641279	0.315339	0.4005	0.787362	0.43107	NA
hsa-miR-5579-5p	2.32295	0.322224	0.372188	0.865758	0.386623	NA
hsa-miR-4259	3.33067	0.279658	0.344657	0.811408	0.417132	NA
hsa-miR-4653-5p	1.98185	0.22405	0.366269	0.611709	0.54073	NA
hsa-miR-6753-5p	3.64768	0.194553	0.333784	0.582871	0.55998	NA
hsa-miR-6830-3p	3.47204	0.145071	0.333708	0.434723	0.663764	NA
hsa-miR-5572	3.87342	0.296812	0.314385	0.944102	0.345117	NA
hsa-miR-4319	0.650372	0.233831	0.399334	0.585552	0.558176	NA
hsa-miR-5089-3p	4.81338	-0.221589	0.294019	-0.753653	0.451058	NA
hsa-miR-4688	6.69548	0.261354	0.343819	0.760149	0.447166	NA
hsa-miR-3173-5p	6.50892	0.426939	0.276171	1.54592	0.122123	NA
hsa-miR-4437	8.40758	-0.653716	0.315847	-2.06972	0.0384785	NA
hsa-miR-3133	3.76979	-0.0340107	0.317749	-0.107036	0.91476	NA
hsa-miR-325	0.669451	0.718061	0.397947	1.80441	0.0711666	NA
hsa-miR-6769a-5p	1.93495	0.0362048	0.37957	0.0953836	0.92401	NA
hsa-miR-493-5p	203.418	-0.35818	0.3706	-0.966487	NA	NA
hsa-miR-138-2-3p	0	NA	NA	NA	NA	NA
hsa-miR-580-5p	0.666137	0.405061	0.392609	1.03172	0.302205	NA
hsa-miR-6133	2.71782	0.286786	0.3642	0.787442	0.431023	NA
hsa-miR-4536-3p	1.50055	0.131617	0.378065	0.348133	0.72774	NA
hsa-miR-548ay-3p	4.27076	0.438075	0.306586	1.42888	0.153039	NA
hsa-miR-6772-5p	3.65929	-0.113507	0.317065	-0.357993	0.720348	NA
hsa-miR-1267	2.7274	0.114211	0.335869	0.340046	0.733822	NA
hsa-miR-33a-3p	0.309666	-0.0994314	0.347051	-0.286504	0.774492	NA
hsa-miR-4734	4.65889	0.0592162	0.317687	0.186398	0.852133	NA
hsa-miR-6812-5p	2.16928	0.576249	0.372437	1.54724	0.121806	NA
hsa-miR-4664-5p	4.92016	0.399009	0.299558	1.33199	0.182864	NA
hsa-miR-4746-3p	2.59662	0.765634	0.35693	2.14506	0.0319484	NA
hsa-miR-137	1.22765	0.563779	0.360129	1.56549	0.117468	NA
hsa-miR-99a-3p	6.59018	0.713025	0.403205	1.76839	0.0769949	NA
hsa-miR-6734-3p	5.40279	-0.0836989	0.277239	-0.301901	0.762727	NA
hsa-miR-5589-3p	5.1484	0.231826	0.282833	0.819656	0.412413	NA
hsa-miR-132-5p	4.8553	-0.0592121	0.358835	-0.165012	0.868934	NA
hsa-miR-6509-3p	5.53776	-0.202435	0.274648	-0.737069	0.46108	NA
hsa-miR-7849-3p	1.98564	-0.696844	0.390679	-1.78367	0.0744765	NA
hsa-miR-514b-5p	0.0712962	0.0210273	0.188849	0.111344	0.911343	NA
hsa-miR-8071	7.93579	-0.355258	0.400365	-0.887336	0.374898	NA
hsa-miR-885-3p	0.93884	-0.193724	0.395284	-0.490089	0.624071	NA
hsa-miR-509-3-5p	6.72804	-1.19816	0.399701	-2.99764	0.00272074	NA
hsa-miR-6875-5p	8.28069	-0.277109	0.274666	-1.0089	0.313025	NA
hsa-miR-543	96.5811	-0.152788	0.377112	-0.405153	NA	NA
hsa-miR-6811-3p	2.89086	0.344028	0.339052	1.01468	0.31026	NA
hsa-miR-3606-5p	0.781197	0.22955	0.398917	0.575433	0.564999	NA
hsa-miR-4275	1.05474	0.259878	0.397266	0.654165	0.513006	NA
hsa-miR-630	7.17572	0.215864	0.270101	0.799197	0.424176	NA
hsa-miR-4755-3p	7.82123	0.368141	0.26386	1.39521	0.162952	NA
hsa-miR-6849-5p	2.12555	0.302966	0.360601	0.840168	0.400814	NA
hsa-miR-4711-5p	3.29675	0.376795	0.319176	1.18052	0.237792	NA
hsa-miR-337-3p	37.4108	-0.307454	0.387247	-0.793948	NA	NA
hsa-miR-3692-3p	4.93896	-0.327074	0.289694	-1.12903	0.258884	NA
hsa-miR-542-5p	2.78039	-0.166416	0.374903	-0.443892	0.657121	NA
hsa-miR-6737-5p	542.995	-0.539573	0.403603	-1.33689	NA	NA
hsa-miR-549a	3.50484	0.0390248	0.352705	0.110645	0.911898	NA
hsa-miR-6505-3p	3.6111	0.244734	0.313633	0.780321	0.435202	NA
hsa-miR-136-3p	172.215	0.0120779	0.401882	0.0300533	NA	NA
hsa-miR-5195-5p	5.1155	-0.0190177	0.292311	-0.0650597	0.948126	NA
hsa-miR-617	1.611	0.288883	0.373222	0.774024	0.438916	NA
hsa-miR-6788-5p	0.790402	-0.550579	0.402171	-1.36902	0.170994	NA
hsa-miR-4524a-5p	5.99257	0.0403558	0.275689	0.146381	0.88362	NA
hsa-miR-4423-5p	1.69723	0.0788234	0.377891	0.208588	0.83477	NA
hsa-miR-3188	3.31583	-0.0846534	0.319897	-0.264627	0.791297	NA
hsa-miR-1224-5p	6.6406	0.0580552	0.303386	0.191358	0.848245	NA
hsa-miR-6832-3p	2.15518	-0.145788	0.349365	-0.417294	0.676463	NA
hsa-miR-4763-3p	1.05744	0.546392	0.395674	1.38092	0.167305	NA
hsa-miR-6820-3p	2.53637	-0.0898936	0.347801	-0.258463	0.79605	NA
hsa-miR-3678-3p	1.41983	-0.032551	0.388199	-0.0838513	0.933175	NA
hsa-miR-8077	2.22987	0.272524	0.376114	0.724579	0.46871	NA
hsa-miR-5008-5p	1.20262	-0.394617	0.395199	-0.998528	0.318023	NA
hsa-miR-3682-5p	2.00761	0.279525	0.377027	0.741393	0.458455	NA
hsa-miR-4293	7.04573	-0.00602607	0.277609	-0.0217071	0.982682	NA
hsa-miR-555	4.77813	0.186493	0.313725	0.594447	0.552213	NA
hsa-miR-4462	6.47261	0.321424	0.354006	0.907963	0.363898	NA
hsa-miR-496	3.63245	-0.39845	0.403064	-0.988554	0.322882	NA
hsa-miR-6763-5p	3.30812	0.30027	0.326029	0.920993	0.357054	NA
hsa-miR-409-3p	1160.28	-0.0690426	0.395098	-0.174748	NA	NA
hsa-miR-6797-3p	6.73002	0.708711	0.268426	2.64025	0.00828459	NA
hsa-miR-4483	2.91632	-0.20107	0.326241	-0.616323	0.537681	NA
hsa-miR-29b-2-5p	2.90311	0.130515	0.321752	0.405638	0.685009	NA
hsa-miR-548ar-5p	4.852	-0.625066	0.312113	-2.00269	0.0452102	NA
hsa-miR-4720-3p	3.77387	-0.445516	0.329689	-1.35132	0.176593	NA
hsa-miR-3157-3p	6.82215	0.108378	0.277673	0.390309	0.696308	NA
hsa-miR-608	1.62213	0.0976666	0.383641	0.254578	0.799049	NA
hsa-miR-6861-3p	1.98408	0.207108	0.367036	0.564272	0.572569	NA
hsa-miR-4763-5p	1.61754	-0.00903845	0.372508	-0.0242638	0.980642	NA
hsa-miR-3672	0.599104	0.37283	0.39463	0.94476	0.344782	NA
hsa-miR-4798-5p	0.750169	-0.359999	0.400744	-0.898325	0.369012	NA
hsa-miR-548ao-5p	7.6707	0.361064	0.249626	1.44642	0.14806	NA
hsa-miR-4703-3p	6.94805	0.0108796	0.268526	0.0405161	0.967682	NA
hsa-miR-6132	2.2175	-0.315882	0.362615	-0.871122	0.383688	NA
hsa-miR-7159-5p	1.40878	0.0531914	0.380419	0.139823	0.8888	NA
hsa-let-7g-3p	0.212367	-0.0816402	0.312872	-0.260938	0.79414	NA
hsa-miR-4725-3p	0.923153	0.0858237	0.395948	0.216755	0.828399	NA
hsa-miR-548ar-3p	2.75949	0.305291	0.354136	0.862073	0.388648	NA
hsa-miR-6731-5p	1.2681	-0.329447	0.39073	-0.843158	0.39914	NA
hsa-miR-7641	4.12771	0.00846475	0.290896	0.0290989	0.976786	NA
hsa-miR-514b-3p	1.19682	-0.00372653	0.390979	-0.00953128	0.992395	NA
hsa-miR-181b-3p	1.83168	0.460102	0.391203	1.17612	0.239546	NA
hsa-miR-3616-3p	3.03027	0.510586	0.328955	1.55214	0.120628	NA
hsa-miR-4722-3p	5.03564	0.256897	0.306484	0.838209	0.401913	NA
hsa-miR-182-3p	4.60805	0.00636354	0.290249	0.0219244	0.982508	NA
hsa-miR-939-3p	8.03692	0.0636746	0.235189	0.270738	0.786593	NA
hsa-miR-3924	0.566863	-0.223832	0.397236	-0.563473	0.573113	NA
hsa-miR-1178-5p	4.75785	-0.0953532	0.328921	-0.289897	0.771895	NA
hsa-miR-3187-5p	2.64087	-0.454406	0.34046	-1.33469	0.181979	NA
hsa-miR-514a-5p	0.15799	-0.114807	0.243574	-0.471342	0.637396	NA
hsa-miR-1236-5p	1.69034	0.177945	0.370916	0.479745	0.631409	NA
hsa-miR-7113-5p	4.26465	0.112959	0.29687	0.380501	0.703574	NA
hsa-miR-6796-5p	3.68544	-0.135707	0.316512	-0.428759	0.668099	NA
hsa-miR-1225-5p	0.673504	0.158291	0.399557	0.396165	0.691983	NA
hsa-miR-7109-5p	7.27092	-0.0220323	0.272704	-0.0807921	0.935607	NA
hsa-miR-503-3p	1.89325	0.269639	0.360084	0.748823	0.453964	NA
hsa-miR-6799-3p	1.99416	0.107844	0.355391	0.303452	0.761545	NA
hsa-miR-5703	4.71862	0.2014	0.324577	0.620502	0.534927	NA
hsa-miR-891a-3p	1.52043	0.34849	0.389193	0.895416	0.370565	NA
hsa-miR-6740-5p	1.26299	-0.0249176	0.388816	-0.0640858	0.948902	NA
hsa-miR-194-3p	1.2199	-0.592736	0.394379	-1.50296	0.132849	NA
hsa-miR-4329	5.74191	0.226657	0.329493	0.687895	0.491519	NA
hsa-miR-584-3p	7.29531	-0.260871	0.260769	-1.00039	0.317122	NA
hsa-miR-499a-5p	5.0989	-0.231647	0.299773	-0.772743	0.439675	NA
hsa-miR-3664-5p	6.40944	0.110662	0.260389	0.424986	0.670847	NA
hsa-miR-369-3p	81.1618	-0.251812	0.40169	-0.626881	NA	NA
hsa-miR-570-3p	6.56439	0.645973	0.296826	2.17627	0.0295352	NA
hsa-miR-6782-3p	2.04509	-0.0684736	0.371037	-0.184547	0.853585	NA
hsa-miR-3135a	6.05905	0.262685	0.289902	0.906119	0.364873	NA
hsa-miR-1263	3.06031	0.224955	0.345763	0.650603	0.515303	NA
hsa-miR-7854-3p	7.84318	0.0593962	0.268006	0.221622	0.824608	NA
hsa-miR-6716-5p	8.34711	0.981866	0.269553	3.64257	0.000269926	NA
hsa-miR-1261	5.79983	-0.15783	0.328728	-0.480123	0.63114	NA
hsa-miR-3920	2.78309	-0.284411	0.339557	-0.837593	0.40226	NA
hsa-miR-6883-5p	1.64317	-0.00856263	0.367434	-0.0233038	0.981408	NA
hsa-miR-3144-3p	2.64893	-0.775204	0.353718	-2.19159	0.0284092	NA
hsa-miR-4666b	4.92769	-0.894912	0.366381	-2.44257	0.0145831	NA
hsa-miR-5691	2.02389	-0.0283573	0.362154	-0.0783017	0.937588	NA
hsa-miR-6165	5.20147	-0.042395	0.312373	-0.135719	0.892043	NA
hsa-miR-127-3p	12772.4	-0.271024	0.396882	-0.682884	NA	NA
hsa-miR-6808-3p	7.75703	-0.210441	0.246164	-0.854881	0.392617	NA
hsa-miR-3689a-5p	3.32186	-0.0518498	0.341068	-0.152022	0.87917	NA
hsa-miR-1185-1-3p	44.3901	-0.186658	0.368642	-0.50634	NA	NA
hsa-miR-4633-5p	0.471209	0.209901	0.392627	0.534607	0.592922	NA
hsa-miR-219b-5p	730.116	0.673886	0.396821	1.69821	NA	NA
hsa-miR-4252	2.65623	-0.290762	0.341679	-0.850981	0.39478	NA
hsa-miR-889-5p	8.3039	-0.470067	0.374189	-1.25623	0.209033	NA
hsa-miR-4699-5p	2.63156	-0.190819	0.341836	-0.558217	0.576697	NA
hsa-miR-6777-5p	2.13952	0.38062	0.361919	1.05167	0.292951	NA
hsa-miR-937-5p	3.88663	-0.172735	0.307793	-0.561206	0.574657	NA
hsa-miR-3689f	1.06531	-0.143115	0.400565	-0.357284	0.720879	NA
hsa-miR-2117	5.03568	0.461708	0.333278	1.38535	0.165944	NA
hsa-miR-96-3p	2.8681	-0.0280169	0.35037	-0.0799637	0.936266	NA
hsa-miR-5582-5p	4.41653	-0.685766	0.369798	-1.85443	0.0636774	NA
hsa-miR-4776-5p	1.72774	0.491877	0.379201	1.29714	0.194583	NA
hsa-miR-3591-3p	4.06034	-0.0852795	0.351659	-0.242506	0.808388	NA
hsa-miR-3658	2.46784	0.548204	0.350565	1.56377	0.117871	NA
hsa-miR-3190-3p	1.37259	0.522271	0.381532	1.36888	0.171038	NA
hsa-miR-8086	0.817273	-0.475923	0.40167	-1.18486	0.236072	NA
hsa-miR-3944-3p	7.93716	-0.354084	0.249861	-1.41712	0.156447	NA
hsa-miR-8065	1.00549	0.0871016	0.398771	0.218425	0.827098	NA
hsa-miR-1255b-2-3p	5.63286	-0.0624683	0.311745	-0.200383	0.841181	NA
hsa-miR-6508-3p	0.645996	-0.752366	0.397936	-1.89067	0.0586686	NA
hsa-miR-5087	2.10719	-0.125156	0.363939	-0.343893	0.730927	NA
hsa-miR-4447	1.10433	0.0229834	0.401599	0.0572298	0.954362	NA
hsa-miR-3978	0.166381	0.210504	0.278469	0.755936	0.449688	NA
hsa-miR-4724-3p	2.71815	0.089697	0.343555	0.261084	0.794027	NA
hsa-miR-6130	4.76925	0.427598	0.310586	1.37675	0.16859	NA
hsa-miR-4316	1.84433	0.444047	0.382383	1.16126	0.245535	NA
hsa-miR-3150b-5p	5.66137	0.00205214	0.275023	0.00746171	0.994046	NA
hsa-miR-1234-3p	4.60841	0.0812707	0.323051	0.251573	0.801371	NA
hsa-miR-4320	2.3133	-0.390025	0.361725	-1.07824	0.280928	NA
hsa-miR-329-5p	2.39793	-0.263079	0.403163	-0.652537	0.514055	NA
hsa-miR-4433b-5p	7.89946	-0.657553	0.291714	-2.2541	0.0241901	NA
hsa-miR-578	1.73075	0.502821	0.381288	1.31874	0.187255	NA
hsa-miR-610	2.37104	0.0466238	0.361944	0.128815	0.897504	NA
hsa-miR-431-5p	134.049	-0.161192	0.393982	-0.409134	NA	NA
hsa-miR-5697	0.78056	-0.551425	0.402683	-1.36938	0.170881	NA
hsa-miR-3119	3.14919	0.812181	0.342737	2.36969	0.0178028	NA
hsa-miR-3617-3p	8.38085	0.639393	0.27326	2.33987	0.0192907	NA
hsa-miR-548aj-3p	0.219013	-0.206196	0.333301	-0.618649	0.536148	NA
hsa-miR-6774-3p	5.5972	-0.195298	0.289681	-0.674183	0.500195	NA
hsa-miR-4643	0.871357	0.455176	0.398147	1.14324	0.252941	NA
hsa-miR-4732-5p	0.594967	-0.0422944	0.399767	-0.105797	0.915743	NA
hsa-let-7i-3p	1.76035	-0.0527175	0.384732	-0.137024	0.891012	NA
hsa-miR-6889-5p	3.14131	0.109737	0.325175	0.337471	0.735762	NA
hsa-miR-6872-3p	2.42585	0.328717	0.353222	0.930624	0.352048	NA
hsa-miR-4282	2.06598	0.245726	0.359193	0.684106	0.493908	NA
hsa-miR-487a-3p	120.403	-0.236455	0.392563	-0.602336	NA	NA
hsa-miR-1204	0.977905	0.141542	0.394962	0.358369	0.720067	NA
hsa-miR-5681b	0.0949652	-0.128507	0.190187	-0.675686	0.49924	NA
hsa-miR-8067	1.53846	0.0988679	0.382739	0.258317	0.796163	NA
hsa-miR-3925-3p	1.62505	-0.211792	0.379936	-0.557441	0.577226	NA
hsa-miR-4678	0.888904	0.126443	0.40087	0.315421	0.752442	NA
hsa-miR-6841-3p	3.42666	-0.0632766	0.313307	-0.201964	0.839945	NA
hsa-miR-552-3p	2.24339	-0.325221	0.358569	-0.906998	0.364408	NA
hsa-miR-4418	3.51857	-0.0755324	0.336844	-0.224236	0.822574	NA
hsa-miR-4747-5p	5.99174	-0.609824	0.378973	-1.60915	0.107584	NA
hsa-miR-6818-5p	4.32117	0.37163	0.30685	1.21111	0.225853	NA
hsa-let-7a-2-3p	0.0953384	-0.0221123	0.19086	-0.115856	0.907766	NA
hsa-miR-548x-3p	1.72925	-0.739293	0.391414	-1.88877	0.0589222	NA
hsa-miR-3657	1.77609	0.217254	0.382925	0.567355	0.570473	NA
hsa-miR-622	6.80807	-0.57528	0.276495	-2.08062	0.037469	NA
hsa-miR-4501	5.0122	-0.311649	0.365519	-0.852619	0.39387	NA
hsa-miR-6802-3p	7.1102	0.100823	0.268725	0.37519	0.707519	NA
hsa-miR-6780b-5p	1.17518	0.470915	0.394494	1.19372	0.232588	NA
hsa-miR-6885-3p	8.08628	-0.0571388	0.322243	-0.177316	0.85926	NA
hsa-miR-711	2.27874	-0.0699755	0.341534	-0.204886	0.837661	NA
hsa-miR-6735-3p	3.55198	0.172574	0.321389	0.536962	0.591294	NA
hsa-miR-4473	5.76024	0.6374	0.33906	1.8799	0.0601213	NA
hsa-miR-149-3p	2.75037	0.134068	0.3421	0.391898	0.695133	NA
hsa-miR-3941	3.30232	0.279538	0.32547	0.858873	0.390411	NA
hsa-miR-6804-5p	6.37436	0.321249	0.29837	1.07668	0.281623	NA
hsa-miR-7852-3p	1.35259	0.409703	0.385841	1.06185	0.288306	NA
hsa-miR-7158-3p	6.11651	-0.252061	0.288086	-0.874951	0.3816	NA
hsa-miR-3612	1.79496	-0.46094	0.381517	-1.20818	0.226978	NA
hsa-miR-4475	1.55811	0.333605	0.382697	0.871721	0.38336	NA
hsa-miR-5704	2.65673	-0.185104	0.34574	-0.535383	0.592385	NA
hsa-miR-379-3p	48.7597	-0.222637	0.378696	-0.587904	NA	NA
hsa-miR-587	2.77275	-0.139081	0.344061	-0.404233	0.686042	NA
hsa-miR-208b-5p	0.630223	-0.0943399	0.399464	-0.236166	0.813304	NA
hsa-miR-6894-5p	5.24448	0.106537	0.281139	0.378947	0.704727	NA
hsa-miR-1229-5p	1.3024	0.181655	0.396487	0.458161	0.646837	NA
hsa-miR-3154	0.44436	-0.095864	0.376333	-0.254732	0.79893	NA
hsa-miR-8081	5.52459	-0.24699	0.304797	-0.810342	0.417744	NA
hsa-miR-1207-3p	2.62323	-0.117234	0.354855	-0.330372	0.741119	NA
hsa-miR-4480	0.641656	-0.0865781	0.400448	-0.216203	0.828829	NA
hsa-miR-6810-5p	0.813915	0.419567	0.3996	1.04997	0.293734	NA
hsa-miR-944	4.17583	-0.743764	0.347368	-2.14114	0.0322629	NA
hsa-miR-4799-3p	0.257969	-0.155402	0.339321	-0.457981	0.646966	NA
hsa-miR-4324	1.02325	-0.190915	0.397407	-0.480403	0.630941	NA
hsa-miR-6845-3p	5.72986	0.385015	0.272926	1.4107	0.158334	NA
hsa-miR-4458	8.19404	0.0538516	0.307925	0.174885	0.86117	NA
hsa-miR-5581-5p	15.6843	-0.59877	0.352468	-1.69879	NA	NA
hsa-miR-890	0.63312	0.0231834	0.396411	0.0584832	0.953364	NA
hsa-miR-3667-3p	5.17383	-0.221326	0.306648	-0.72176	0.470442	NA
hsa-miR-4491	1.71653	-0.0609071	0.375709	-0.162112	0.871217	NA
hsa-miR-4772-3p	1.00978	0.352716	0.402332	0.876678	0.380662	NA
hsa-let-7f-2-3p	0.103361	-0.0112241	0.190931	-0.0587865	0.953122	NA
hsa-miR-2114-3p	5.23091	0.422973	0.2987	1.41604	0.156763	NA
hsa-miR-613	1.25008	-0.0728379	0.393679	-0.185018	0.853215	NA
hsa-miR-370-5p	7.31583	-0.270121	0.360023	-0.750289	0.453081	NA
hsa-miR-135a-3p	2.57602	0.228834	0.357977	0.639241	0.522666	NA
hsa-miR-3613-3p	0.110364	0.0209675	0.188848	0.111029	0.911594	NA
hsa-miR-6801-5p	3.91174	0.022756	0.327653	0.0694516	0.94463	NA
hsa-miR-7155-5p	3.60132	-0.10597	0.344363	-0.307728	0.758289	NA
hsa-miR-4710	3.82935	0.359891	0.299799	1.20044	0.229968	NA
hsa-miR-6886-3p	3.32145	0.501884	0.327445	1.53273	0.125343	NA
hsa-miR-6810-3p	4.17399	0.0499563	0.298695	0.167248	0.867175	NA
hsa-miR-552-5p	3.38761	-0.0751467	0.339393	-0.221415	0.824769	NA
hsa-miR-646	2.78204	0.312996	0.338956	0.923413	0.355792	NA
hsa-miR-494-5p	1.39477	-0.16256	0.34009	-0.47799	0.632658	NA
hsa-miR-144-3p	0.586712	-0.517188	0.390515	-1.32438	0.185378	NA
hsa-miR-6760-5p	4.02929	0.781894	0.330693	2.36441	0.0180589	NA
hsa-miR-3151-3p	1.00355	0.280869	0.393364	0.714017	0.475217	NA
hsa-miR-499b-5p	1.01367	0.26929	0.396361	0.679408	0.49688	NA
hsa-miR-4774-5p	4.01568	0.127534	0.33593	0.379645	0.704209	NA
hsa-miR-4685-5p	2.35845	-0.0496943	0.355673	-0.139719	0.888882	NA
hsa-miR-6513-3p	1.4532	0.130845	0.385772	0.339177	0.734477	NA
hsa-miR-642a-3p	8.45412	-0.396184	0.271301	-1.46031	0.144204	NA
[truncated: 566 more rows]

## Sheet: neurons
mature miRNA name	baseMean	log2FoldChange	lfcSE	stat	pvalue	padj
hsa-miR-3609	157.505	-2.00864	0.370368	-5.42335	5.84907e-08	4.0651e-05
hsa-miR-1248	671.197	-2.37536	0.521581	-4.55414	5.25992e-06	0.00182782
hsa-miR-1273f	35.74	-1.66786	0.407216	-4.09576	4.20778e-05	0.00974802
hsa-miR-196a-5p	34.406	-2.47236	0.638074	-3.87473	0.000106745	0.0180699
hsa-miR-4455	381.521	1.78578	0.466694	3.82646	0.000129999	0.0180699
hsa-miR-619-5p	399.932	-1.42831	0.381957	-3.73944	0.000184429	0.0183111
hsa-miR-5706	106.562	-1.50717	0.402206	-3.74726	0.000178778	0.0183111
hsa-miR-1470	51.5177	1.44959	0.396863	3.65261	0.000259593	0.0200464
hsa-miR-1273h-5p	47.822	-1.57912	0.430082	-3.67168	0.000240964	0.0200464
hsa-miR-4693-3p	336.747	-1.27903	0.362423	-3.5291	0.000416972	0.0289796
hsa-miR-1260b	428.213	1.37435	0.395888	3.47156	0.000517445	0.0322972
hsa-miR-1273e	64.1667	-1.45334	0.421085	-3.45142	0.00055765	0.0322972
hsa-miR-5096	399.724	-1.39137	0.407509	-3.41433	0.000639391	0.0341828
hsa-miR-3908	96.9727	-1.63449	0.484301	-3.37495	0.000738295	0.0366511
hsa-miR-222-5p	37.2058	1.76252	0.535544	3.29109	0.000997995	0.0462404
hsa-miR-4764-5p	31.2557	-1.3014	0.398931	-3.26222	0.00110544	0.0480174
hsa-miR-6082	396.326	-2.05866	0.648525	-3.17437	0.00150161	0.0549272
hsa-miR-6840-5p	1169.75	1.33845	0.421376	3.17637	0.00149129	0.0549272
hsa-miR-100-3p	127.138	1.8196	0.567494	3.20638	0.00134416	0.0549272
hsa-let-7c-5p	45859.9	1.16563	0.380683	3.06196	0.00219896	0.0764139
hsa-miR-3176	92.293	1.11845	0.372909	2.99926	0.00270639	0.080794
hsa-miR-4783-5p	3760.34	1.01004	0.337808	2.98997	0.00279001	0.080794
hsa-miR-27a-5p	113.906	1.11735	0.371009	3.01164	0.00259842	0.080794
hsa-miR-4281	62.1335	1.15725	0.38193	3.03001	0.00244542	0.080794
hsa-miR-1285-5p	29.6033	-1.33371	0.449932	-2.96424	0.00303427	0.0842981
hsa-let-7a-5p	28885.4	1.37511	0.469418	2.9294	0.00339618	0.0842981
hsa-miR-5196-3p	43.9287	-1.61962	0.55082	-2.94037	0.00327817	0.0842981
hsa-miR-4707-3p	3885.68	1.11702	0.378419	2.95181	0.00315914	0.0842981
hsa-miR-34a-3p	68.1838	1.09742	0.379112	2.89472	0.00379492	0.0879891
hsa-miR-1273g-3p	1783.89	-1.12087	0.388631	-2.88415	0.00392469	0.0879891
hsa-miR-3942-3p	53.6438	-1.06202	0.367525	-2.88965	0.00385674	0.0879891
hsa-let-7c-3p	114.37	1.3197	0.460511	2.86572	0.00416059	0.0903627
hsa-miR-125b-2-3p	1899.34	1.08523	0.389836	2.78381	0.00537237	0.0933449
hsa-miR-489-3p	976.063	1.35309	0.485496	2.78702	0.00531957	0.0933449
hsa-miR-32-3p	71.9182	0.814461	0.287407	2.83383	0.00459942	0.0933449
hsa-miR-1292-3p	9200.1	1.16332	0.412753	2.81845	0.00482568	0.0933449
hsa-let-7b-5p	607.216	1.6532	0.581521	2.84288	0.00447073	0.0933449
hsa-miR-153-3p	1597.81	-1.32347	0.469732	-2.81751	0.00483977	0.0933449
hsa-miR-146a-5p	111.313	-1.07072	0.382509	-2.7992	0.00512294	0.0933449
hsa-miR-6746-3p	43.7206	0.861523	0.30809	2.79633	0.0051686	0.0933449
hsa-miR-1915-5p	42.4934	1.17143	0.428795	2.73191	0.00629686	0.104603
hsa-miR-181b-3p	68.3715	0.960646	0.351804	2.73063	0.00632131	0.104603
hsa-miR-3181	29.8473	0.960272	0.353626	2.7155	0.00661755	0.106198
hsa-miR-1251-5p	4295.56	0.864407	0.31894	2.71025	0.00672334	0.106198
hsa-miR-3156-5p	32.7363	-1.19345	0.446526	-2.67274	0.00752341	0.116195
hsa-miR-125b-1-3p	2366.71	1.32441	0.499796	2.64991	0.0080513	0.121645
hsa-miR-653-5p	2461.43	1.29032	0.492482	2.62003	0.00879214	0.123555
hsa-miR-4707-5p	873.452	1.052	0.402093	2.6163	0.00888885	0.123555
hsa-miR-653-3p	86.5107	1.23412	0.469322	2.62958	0.00854909	0.123555
hsa-miR-5095	107.979	-1.05087	0.398663	-2.63597	0.00838965	0.123555
hsa-miR-125a-5p	29790.9	0.943836	0.362062	2.60684	0.00913831	0.124532
hsa-miR-99a-3p	769.857	0.895128	0.346292	2.58489	0.009741	0.126685
hsa-miR-3653-5p	208.99	-1.17649	0.453595	-2.5937	0.00949481	0.126685
hsa-miR-3168	1199.64	-1.00526	0.389441	-2.58129	0.00984311	0.126685
hsa-miR-4787-3p	296.535	0.98642	0.384517	2.56535	0.0103072	0.130246
hsa-miR-2277-3p	139.967	1.12141	0.439928	2.54907	0.010801	0.134048
hsa-let-7f-5p	31187.5	0.891661	0.352793	2.52743	0.0114899	0.138978
hsa-let-7d-3p	297.414	1.10798	0.438955	2.52414	0.0115982	0.138978
hsa-miR-21-3p	13740.7	1.07045	0.426204	2.5116	0.0120185	0.141574
hsa-miR-1915-3p	93.9829	1.32774	0.530611	2.50228	0.0123397	0.142935
hsa-miR-5007-3p	50.3256	-1.33047	0.537207	-2.47665	0.0132622	0.151102
hsa-miR-222-3p	4394.37	1.31231	0.532263	2.46553	0.013681	0.15336
hsa-miR-6724-5p	7604.83	1.25988	0.515638	2.44334	0.0145519	0.160533
hsa-miR-4778-5p	50.2934	-1.16653	0.480222	-2.42916	0.015134	0.164345
hsa-miR-5585-3p	203.711	-0.851265	0.352933	-2.41197	0.0158665	0.16965
hsa-miR-106a-5p	545.416	1.26096	0.531386	2.37296	0.0176464	0.185822
hsa-miR-30a-3p	3176.91	0.744001	0.319038	2.33201	0.0197001	0.193634
hsa-miR-1228-5p	55.6109	1.22309	0.520751	2.3487	0.0188391	0.193634
hsa-let-7g-5p	9479.06	1.01645	0.436155	2.33047	0.0197814	0.193634
hsa-miR-1307-3p	1593.61	0.626122	0.267627	2.33953	0.0193081	0.193634
hsa-miR-671-3p	1152.02	0.641732	0.273679	2.34483	0.0190357	0.193634
hsa-miR-4531	160.734	0.981968	0.422935	2.3218	0.0202439	0.19541
hsa-miR-1307-5p	8330.65	0.787803	0.340178	2.31586	0.0205661	0.1958
hsa-miR-6784-5p	93.3987	-1.2927	0.563851	-2.29262	0.0218698	0.197354
hsa-miR-4521	59.0886	0.9945	0.433286	2.29525	0.0217188	0.197354
hsa-miR-3613-5p	76.2888	0.790542	0.345547	2.2878	0.0221491	0.197354
hsa-miR-125b-5p	142638	0.903079	0.393964	2.29229	0.021889	0.197354
hsa-miR-99a-5p	48472.1	0.873409	0.380623	2.29468	0.0217513	0.197354
hsa-miR-1224-5p	33.7312	-1.15426	0.506136	-2.28054	0.0225758	0.19861
hsa-miR-221-5p	1029.18	1.16651	0.515593	2.26247	0.0236684	0.199958
hsa-miR-6736-3p	39.5319	-1.05858	0.468595	-2.25906	0.0238799	0.199958
hsa-miR-6773-5p	36.1366	-1.15702	0.510832	-2.26496	0.0235149	0.199958
hsa-miR-345-5p	9515.02	0.818935	0.361191	2.26732	0.023371	0.199958
hsa-let-7g-3p	32.522	1.04797	0.466613	2.2459	0.0247102	0.204447
hsa-miR-6879-5p	35.47	-1.09128	0.494278	-2.20783	0.0272561	0.220267
hsa-miR-92b-5p	591.244	0.821588	0.372047	2.20829	0.0272242	0.220267
hsa-miR-4439	33.8169	-0.960029	0.437972	-2.19199	0.0283802	0.226716
hsa-miR-4430	157.439	-0.848922	0.39617	-2.14282	0.0321274	0.245959
hsa-miR-153-5p	49.6799	-1.10198	0.512152	-2.15167	0.0314231	0.245959
hsa-miR-5193	109.824	-0.789432	0.368573	-2.14186	0.0322047	0.245959
hsa-miR-15a-5p	896.537	0.656298	0.305385	2.14909	0.0316274	0.245959
hsa-miR-769-3p	77.1548	0.764224	0.357997	2.13472	0.0327836	0.247658
hsa-miR-4749-5p	459.218	-1.00061	0.49156	-2.03557	0.0417935	0.258053
hsa-miR-6075	288.464	1.15475	0.551483	2.09389	0.0362698	0.258053
hsa-miR-3074-3p	43.7657	0.699468	0.34195	2.04553	0.040803	0.258053
hsa-miR-339-3p	391.258	0.68	0.326621	2.08192	0.0373496	0.258053
hsa-miR-30a-5p	146339	0.580941	0.275377	2.10962	0.0348912	0.258053
hsa-miR-3653-3p	92.1327	-0.741834	0.358882	-2.06707	0.0387277	0.258053
hsa-miR-505-5p	35.7979	0.734658	0.358138	2.05133	0.0402351	0.258053
hsa-miR-28-5p	1948.12	0.694839	0.340326	2.04169	0.0411827	0.258053
hsa-miR-574-5p	169.934	0.887707	0.433632	2.04714	0.0406439	0.258053
hsa-miR-99b-3p	807.032	0.712978	0.341677	2.0867	0.0369149	0.258053
hsa-miR-3938	46.9498	0.711269	0.348478	2.04107	0.0412434	0.258053
hsa-miR-4532	7547.56	0.930874	0.446291	2.0858	0.0369968	0.258053
hsa-miR-128-1-5p	75.9607	0.756832	0.3721	2.03395	0.0419569	0.258053
hsa-miR-100-5p	126873	1.23774	0.592167	2.09018	0.0366013	0.258053
hsa-miR-181c-5p	12259.7	0.610283	0.298834	2.04222	0.0411302	0.258053
hsa-miR-27a-3p	5345.97	0.853381	0.417899	2.04208	0.041144	0.258053
hsa-miR-20b-5p	1693.72	1.14041	0.548883	2.07769	0.0377378	0.258053
hsa-miR-5689	42.0793	-0.900519	0.427673	-2.10562	0.035237	0.258053
hsa-miR-2110	62.2273	0.631956	0.308363	2.04939	0.0404236	0.258053
hsa-miR-3607-5p	9612.98	-1.0381	0.500012	-2.07616	0.0378794	0.258053
hsa-miR-663b	3417.8	0.770789	0.375726	2.05147	0.0402215	0.258053
hsa-miR-584-5p	49.1034	0.810043	0.399103	2.02966	0.042391	0.258436
hsa-miR-181d-5p	3562.91	0.596171	0.297374	2.00479	0.0449856	0.27187
hsa-miR-148a-5p	988.451	0.897656	0.456685	1.96559	0.0493456	0.282226
hsa-miR-26b-3p	130.395	0.653596	0.34268	1.90731	0.0564811	0.282226
hsa-miR-1286	131.932	0.727535	0.381689	1.90609	0.0566383	0.282226
hsa-miR-4790-5p	90.6107	-0.817499	0.418385	-1.95394	0.0507084	0.282226
hsa-miR-1305	74.132	0.68706	0.361822	1.89889	0.0575787	0.282226
hsa-miR-30c-1-3p	228.81	0.675758	0.355054	1.90326	0.0570072	0.282226
hsa-miR-18b-5p	55.3367	1.06755	0.552461	1.93236	0.0533154	0.282226
hsa-miR-1469	644.239	0.707953	0.365333	1.93783	0.0526442	0.282226
hsa-miR-34a-5p	2223.19	0.829953	0.430409	1.92829	0.0538189	0.282226
hsa-miR-615-3p	108.438	-1.21081	0.622935	-1.94373	0.0519284	0.282226
hsa-miR-4520-3p	32.2882	0.685511	0.349942	1.95893	0.0501214	0.282226
hsa-let-7e-3p	264.079	0.738112	0.375156	1.96748	0.0491276	0.282226
hsa-let-7e-5p	15484.4	0.826937	0.432492	1.91203	0.0558725	0.282226
hsa-miR-7157-5p	51.6608	-0.771266	0.403203	-1.91285	0.0557676	0.282226
hsa-miR-16-5p	65768.1	0.59578	0.310429	1.91922	0.0549568	0.282226
hsa-miR-1972	151.319	-0.725709	0.377672	-1.92153	0.0546646	0.282226
hsa-miR-30d-3p	472.585	0.685873	0.356707	1.92279	0.0545064	0.282226
hsa-miR-4485-5p	289.707	-1.08191	0.572096	-1.89113	0.0586066	0.282226
hsa-miR-1268b	29.8267	0.71575	0.368119	1.94434	0.0518543	0.282226
hsa-miR-125a-3p	167.209	0.787642	0.401886	1.95986	0.0500118	0.282226
hsa-miR-4300	63.1991	-0.986705	0.518271	-1.90384	0.0569309	0.282226
hsa-miR-99b-5p	499450	0.749964	0.394475	1.90117	0.0572798	0.282226
hsa-miR-4326	209.789	0.541189	0.285552	1.89524	0.058061	0.282226
hsa-miR-708-3p	869.574	0.730623	0.36914	1.97925	0.0477874	0.282226
hsa-miR-4668-5p	269.539	-0.965453	0.487616	-1.97995	0.0477095	0.282226
hsa-miR-4271	274.831	-0.677635	0.352031	-1.92493	0.054238	0.282226
hsa-miR-940	92.8135	0.707777	0.3742	1.89144	0.0585653	0.282226
hsa-miR-30e-3p	2680.9	0.685331	0.362786	1.88908	0.0588816	0.282226
hsa-miR-221-3p	1507.96	0.935147	0.478156	1.95574	0.050496	0.282226
hsa-miR-6815-5p	33.1051	1.07376	0.561195	1.91335	0.0557037	0.282226
hsa-miR-199a-3p	153.331	0.754902	0.406591	1.85666	0.0633593	0.301607
hsa-miR-1973	235.444	-1.10262	0.599741	-1.83849	0.0659902	0.306653
hsa-miR-24-2-5p	460.024	0.820653	0.446693	1.83717	0.0661842	0.306653
hsa-miR-1908-3p	276.797	0.902219	0.489662	1.84254	0.0653968	0.306653
hsa-miR-1184	31.6226	-0.690806	0.374586	-1.84419	0.0651559	0.306653
hsa-miR-4745-3p	24435.3	1.00309	0.54909	1.82682	0.0677273	0.308894
hsa-miR-4309	128.92	-0.898796	0.493178	-1.82246	0.0683854	0.308894
hsa-miR-1269b	282.512	1.18785	0.651926	1.82206	0.0684455	0.308894
hsa-miR-4286	615.117	0.562825	0.308802	1.82261	0.0683628	0.308894
hsa-miR-151b	60050.6	0.615366	0.340226	1.8087	0.0704979	0.314077
hsa-miR-1468-5p	313.989	0.631888	0.349331	1.80885	0.0704744	0.314077
hsa-miR-151a-5p	59513.2	0.612672	0.33948	1.80474	0.0711157	0.314812
hsa-miR-4792	321.199	-1.02472	0.571306	-1.79364	0.0728713	0.320542
hsa-miR-193b-3p	404.147	0.624244	0.349359	1.78682	0.073966	0.322391
hsa-miR-6720-5p	176.882	0.675485	0.378368	1.78526	0.0742194	0.322391
hsa-miR-199b-5p	1574.53	0.818177	0.466095	1.75539	0.0791933	0.324864
hsa-miR-3175	97.1695	0.678788	0.38286	1.77294	0.0762384	0.324864
hsa-miR-3960	225.732	0.539947	0.307266	1.75726	0.0788727	0.324864
hsa-miR-5585-5p	63.163	-0.557218	0.316342	-1.76145	0.0781631	0.324864
hsa-miR-210-5p	121.897	0.720752	0.406379	1.77359	0.0761302	0.324864
hsa-miR-3158-5p	124.706	0.586462	0.334393	1.75381	0.0794632	0.324864
hsa-miR-181a-5p	309040	0.506796	0.287255	1.76427	0.0776861	0.324864
hsa-miR-4690-5p	56.1259	0.782701	0.444004	1.76283	0.07793	0.324864
hsa-miR-4634	12477.4	-0.803855	0.458346	-1.75382	0.0794618	0.324864
hsa-miR-7974	42.8513	0.830556	0.470244	1.76623	0.0773581	0.324864
hsa-miR-363-3p	13398	0.951049	0.543479	1.74993	0.080131	0.325679
hsa-miR-324-3p	321.256	0.515619	0.295948	1.74226	0.0814626	0.329166
hsa-miR-6763-3p	165.637	0.626187	0.361192	1.73367	0.0829765	0.331429
hsa-miR-1291	239.426	-0.953467	0.549188	-1.73614	0.0825392	0.331429
hsa-miR-3140-5p	30.802	-0.838181	0.486143	-1.72414	0.0846817	0.335969
hsa-miR-208b-3p	96.3235	0.56962	0.331313	1.71928	0.0855633	0.335969
hsa-miR-6874-5p	43.3567	-0.811248	0.471143	-1.72187	0.0850928	0.335969
hsa-miR-642b-3p	36.5979	-0.828503	0.484929	-1.7085	0.0875432	0.341812
hsa-miR-190a-5p	145.323	0.734992	0.431772	1.70227	0.0887053	0.344415
hsa-miR-4315	70.2823	1.01821	0.600088	1.69676	0.0897414	0.346501
hsa-miR-941	9587.28	0.601788	0.356235	1.6893	0.091162	0.348119
hsa-miR-3677-3p	85.9423	0.59896	0.354326	1.69042	0.0909476	0.348119
hsa-miR-744-3p	228.578	0.627368	0.373053	1.68171	0.0926244	0.35177
hsa-miR-181b-5p	22568.4	0.519913	0.310608	1.67386	0.0941586	0.355654
hsa-miR-4788	45.0051	-0.735413	0.442099	-1.66346	0.0962205	0.361477
hsa-miR-28-3p	31380.3	0.558701	0.336861	1.65855	0.0972064	0.363217
hsa-miR-148b-5p	944.296	0.508463	0.308048	1.65059	0.0988216	0.367278
hsa-miR-4677-3p	102.554	0.622456	0.378134	1.64613	0.0997379	0.368712
hsa-miR-671-5p	238.278	0.452599	0.280137	1.61564	0.106173	0.390424
hsa-miR-6836-3p	172.609	0.695036	0.433999	1.60147	0.109273	0.393696
hsa-miR-4512	3302.59	-0.902185	0.562603	-1.60359	0.108804	0.393696
hsa-miR-6852-5p	98.3704	0.732788	0.455995	1.60701	0.108053	0.393696
hsa-miR-1277-5p	155.048	0.565121	0.352932	1.60122	0.109329	0.393696
hsa-miR-7112-3p	203.674	-0.712871	0.446463	-1.59671	0.110331	0.395257
hsa-miR-515-3p	119.857	-0.911813	0.573854	-1.58893	0.112077	0.399453
hsa-miR-181d-3p	274.306	0.994726	0.628356	1.58306	0.113408	0.400272
hsa-miR-505-3p	357.849	0.554743	0.350473	1.58284	0.113458	0.400272
hsa-miR-561-5p	618.045	0.64223	0.406906	1.57833	0.114491	0.401874
hsa-miR-181a-3p	4942.03	0.699316	0.444193	1.57435	0.115406	0.403052
hsa-miR-548b-5p	225.899	0.743419	0.477515	1.55685	0.119506	0.409449
hsa-miR-4527	40.028	-0.572069	0.366705	-1.56002	0.118754	0.409449
hsa-miR-29c-3p	295.782	0.520553	0.334801	1.55481	0.11999	0.409449
hsa-miR-92b-3p	714040	0.690976	0.444642	1.554	0.120184	0.409449
hsa-miR-602	58.0159	-0.841773	0.539946	-1.559	0.118997	0.409449
hsa-miR-194-5p	257.835	0.499343	0.323151	1.54523	0.122291	0.412583
hsa-miR-30c-5p	36150.6	0.534545	0.345614	1.54665	0.121947	0.412583
hsa-miR-4449	157.089	0.747505	0.48632	1.53707	0.124277	0.412859
hsa-miR-718	2478.27	1.00082	0.649802	1.54019	0.123513	0.412859
hsa-miR-548ay-5p	29.6207	0.57693	0.374766	1.53944	0.123697	0.412859
hsa-miR-589-5p	2112.2	0.546841	0.356215	1.53514	0.124749	0.412859
hsa-miR-197-3p	5427.51	0.540203	0.354476	1.52395	0.127521	0.416392
hsa-miR-24-1-5p	33.5697	0.549187	0.363039	1.51275	0.130343	0.416392
hsa-miR-22-3p	87052.1	0.638033	0.422362	1.51063	0.130882	0.416392
hsa-miR-188-5p	88.3462	0.694338	0.455168	1.52545	0.127146	0.416392
hsa-miR-6071	128.719	-0.689791	0.45671	-1.51035	0.130955	0.416392
hsa-miR-1276	397.974	0.700155	0.463421	1.51084	0.130829	0.416392
hsa-miR-744-5p	3112.04	0.668488	0.440028	1.51919	0.128714	0.416392
hsa-miR-1180-3p	1858.76	0.473301	0.311607	1.5189	0.128787	0.416392
hsa-miR-33a-5p	162.119	0.69615	0.461224	1.50935	0.131208	0.416392
hsa-miR-6087	805.172	-0.57697	0.383438	-1.50473	0.132394	0.41799
hsa-miR-6850-3p	1643.49	-0.807881	0.538451	-1.50038	0.133516	0.41799
hsa-miR-2115-3p	37.4601	0.706635	0.470804	1.50091	0.133378	0.41799
hsa-miR-4486	34.7433	0.882595	0.591116	1.4931	0.135411	0.418269
hsa-miR-181c-3p	553.246	0.494264	0.331024	1.49314	0.135401	0.418269
hsa-miR-1303	59.5097	-0.532532	0.356504	-1.49376	0.135238	0.418269
hsa-miR-21-5p	232386	0.653934	0.439098	1.48927	0.136417	0.419513
hsa-miR-16-2-3p	302.67	0.458455	0.308479	1.48618	0.137232	0.420158
hsa-let-7a-3p	85.9345	0.780786	0.527018	1.48152	0.138469	0.422087
hsa-miR-6511a-3p	64.4635	0.417286	0.283805	1.47033	0.141473	0.425645
hsa-miR-1271-5p	4788.76	0.509627	0.345833	1.47362	0.140584	0.425645
hsa-miR-15b-3p	245.684	0.65201	0.442951	1.47197	0.141029	0.425645
hsa-miR-2861	67.812	0.882013	0.602785	1.46323	0.143405	0.427885
hsa-miR-490-3p	101.633	-0.807063	0.551625	-1.46307	0.143449	0.427885
hsa-miR-1206	821.971	-0.675151	0.468255	-1.44185	0.149346	0.443571
hsa-miR-6892-3p	49.2812	-0.800753	0.558776	-1.43305	0.151844	0.447168
hsa-miR-32-5p	42.9824	0.464757	0.324216	1.43348	0.151721	0.447168
hsa-miR-3185	43.8808	-0.571684	0.400385	-1.42784	0.153339	0.449665
hsa-miR-3912-3p	63.3227	0.479081	0.340923	1.40524	0.159949	0.467077
hsa-miR-6715b-5p	54.0379	-0.602991	0.430545	-1.40053	0.161355	0.469211
hsa-miR-497-5p	61.0101	0.488765	0.353285	1.38349	0.166516	0.482202
hsa-miR-548b-3p	145.729	0.535422	0.38994	1.37309	0.169724	0.489454
hsa-miR-361-5p	3710.05	0.535071	0.390863	1.36895	0.171015	0.491138
hsa-miR-375	12945.9	-0.727714	0.53648	-1.35646	0.174953	0.49774
hsa-miR-151a-3p	44015.3	0.442032	0.326257	1.35486	0.175462	0.49774
hsa-miR-548i	32.3784	0.539345	0.397535	1.35672	0.174869	0.49774
hsa-miR-935	1106.98	0.541981	0.40397	1.34164	0.179714	0.507728
hsa-miR-873-3p	60.9512	0.480163	0.358542	1.33921	0.180502	0.507891
hsa-let-7i-5p	7842.31	0.544191	0.410296	1.32634	0.184727	0.517683
hsa-miR-1909-3p	342.571	0.772098	0.587856	1.31341	0.189043	0.523429
hsa-miR-6793-5p	71.706	-0.846807	0.647785	-1.30723	0.191133	0.523429
hsa-miR-6785-3p	139.806	-0.505994	0.385265	-1.31337	0.189059	0.523429
hsa-miR-4484	1049.05	0.684997	0.524198	1.30675	0.191296	0.523429
hsa-miR-30b-5p	5589.22	0.415673	0.317209	1.31041	0.190058	0.523429
hsa-miR-3158-3p	104.552	0.430059	0.326674	1.31648	0.188013	0.523429
hsa-miR-455-5p	963.122	0.602508	0.462258	1.3034	0.192437	0.524485
hsa-miR-551b-3p	376.053	0.520465	0.400551	1.29937	0.193816	0.526179
hsa-miR-4751	372.837	0.688908	0.532122	1.29464	0.195443	0.528533
hsa-miR-34c-5p	1963.09	0.698028	0.543783	1.28365	0.199264	0.534193
hsa-miR-30e-5p	58450.5	0.385022	0.299436	1.28582	0.198505	0.534193
hsa-miR-6895-5p	37.9076	-0.44621	0.348057	-1.282	0.199842	0.534193
hsa-miR-6816-5p	391.675	0.483435	0.378599	1.27691	0.201635	0.536097
hsa-miR-550b-2-5p	71.2476	0.626111	0.490837	1.2756	0.202097	0.536097
hsa-miR-550a-3p	67.3096	0.629044	0.495426	1.2697	0.20419	0.53959
hsa-miR-218-2-3p	41.888	-0.528637	0.418037	-1.26457	0.206025	0.542376
hsa-miR-424-3p	143.944	0.554977	0.440522	1.25982	0.207736	0.544817
hsa-miR-7151-3p	43.2228	-0.457373	0.36397	-1.25662	0.20889	0.545784
hsa-miR-6765-5p	93.849	-0.553325	0.444986	-1.24346	0.213697	0.556251
hsa-miR-331-3p	2214.73	0.39582	0.320482	1.23508	0.216801	0.562227
hsa-miR-31-3p	31.6935	0.548578	0.445334	1.23183	0.218011	0.563263
hsa-miR-148b-3p	12585.2	0.401443	0.328869	1.22068	0.222209	0.569871
hsa-miR-1301-5p	51.9873	-0.745351	0.610441	-1.221	0.222084	0.569871
hsa-miR-1306-5p	45.0808	0.527279	0.433622	1.21599	0.22399	0.572327
hsa-miR-4292	36.7764	0.50582	0.417277	1.21219	0.225438	0.573918
hsa-miR-4746-5p	105.356	0.435311	0.361464	1.2043	0.228473	0.576009
hsa-miR-3529-5p	156.13	-0.730221	0.60727	-1.20246	0.229183	0.576009
hsa-miR-659-5p	40.6061	0.429707	0.357224	1.20291	0.229012	0.576009
hsa-miR-618	41.0936	0.613509	0.510638	1.20146	0.229575	0.576009
hsa-miR-1914-5p	53.8094	0.365534	0.305694	1.19575	0.231794	0.57847
hsa-miR-550b-3p	146.736	0.548896	0.459458	1.19466	0.23222	0.57847
hsa-miR-550a-5p	66.5808	0.601321	0.50435	1.19227	0.233156	0.578726
hsa-miR-191-5p	230957	0.380387	0.321481	1.18323	0.236717	0.58368
hsa-miR-937-3p	74.1416	0.407371	0.34437	1.18294	0.236831	0.58368
hsa-miR-548ah-3p	335.138	0.514544	0.4371	1.17718	0.239125	0.587251
hsa-miR-5579-3p	32.6062	-0.44569	0.382967	-1.16378	0.244513	0.598367
hsa-miR-1343-3p	258.575	0.491919	0.424493	1.15884	0.246522	0.599065
hsa-miR-1227-3p	88.8257	0.436324	0.376046	1.16029	0.245929	0.599065
hsa-miR-10a-5p	99185.6	-0.653422	0.570516	-1.14532	0.252078	0.602554
hsa-miR-3153	248.892	0.50979	0.443591	1.14923	0.250459	0.602554
hsa-miR-450b-5p	314.841	0.513754	0.448772	1.1448	0.252292	0.602554
hsa-miR-6796-3p	200.359	0.677735	0.588902	1.15084	0.249796	0.602554
hsa-miR-708-5p	2103.83	0.378551	0.33067	1.1448	0.252292	0.602554
hsa-miR-1237-3p	35.873	-0.477118	0.417568	-1.14261	0.2532	0.60265
hsa-miR-1179	759.254	-0.68999	0.60792	-1.135	0.256375	0.604002
hsa-miR-191-3p	204.148	0.475788	0.419	1.13553	0.256153	0.604002
hsa-miR-484	4932.9	0.437148	0.385068	1.13525	0.256271	0.604002
hsa-miR-23a-3p	6357.94	0.547707	0.486385	1.12608	0.260133	0.610785
hsa-miR-1301-3p	2307.02	0.247489	0.220277	1.12354	0.261209	0.611247
hsa-miR-7108-5p	221.608	0.549084	0.491021	1.11825	0.263461	0.614447
hsa-miR-582-3p	1175.26	0.529924	0.477706	1.10931	0.267296	0.615135
hsa-miR-6790-3p	5084.77	0.627937	0.565248	1.11091	0.266609	0.615135
hsa-miR-4459	89.993	0.46809	0.420549	1.11305	0.265689	0.615135
hsa-miR-455-3p	443.154	0.60059	0.539426	1.11339	0.265542	0.615135
hsa-miR-106b-5p	3505.55	0.322803	0.292123	1.10502	0.269149	0.615324
hsa-miR-192-5p	7224.15	0.381957	0.345521	1.10545	0.268963	0.615324
hsa-miR-3182	30.6748	-0.445127	0.405321	-1.09821	0.272113	0.616021
hsa-miR-129-1-3p	47.2198	-0.461107	0.419103	-1.10022	0.271236	0.616021
hsa-miR-3939	44.7944	0.412116	0.375244	1.09826	0.27209	0.616021
hsa-miR-3178	1754.04	0.376332	0.344008	1.09396	0.273972	0.618216
hsa-miR-6787-5p	272.124	-0.446574	0.409974	-1.08927	0.276034	0.620852
hsa-miR-877-5p	1174.08	0.481485	0.44427	1.08377	0.278468	0.622521
hsa-miR-550a-3-5p	108.663	0.512022	0.472886	1.08276	0.278916	0.622521
hsa-miR-17-5p	6201.76	0.417026	0.38559	1.08153	0.279463	0.622521
hsa-miR-4665-3p	1316.16	-0.341592	0.318914	-1.07111	0.28412	0.624214
hsa-miR-4448	1131.43	-0.541659	0.507267	-1.0678	0.285611	0.624214
hsa-miR-27b-5p	392.492	0.336813	0.313451	1.07453	0.282584	0.624214
hsa-miR-7-2-3p	35.0077	-0.662899	0.618472	-1.07183	0.283795	0.624214
hsa-miR-26b-5p	20561.5	0.304517	0.285033	1.06836	0.28536	0.624214
hsa-miR-20a-5p	5798.63	0.407399	0.38061	1.07038	0.284446	0.624214
hsa-miR-4665-5p	825.764	0.520886	0.49372	1.05502	0.291414	0.626099
hsa-miR-6127	39.536	0.499994	0.472617	1.05793	0.290089	0.626099
hsa-miR-548av-3p	509.206	0.449216	0.424296	1.05873	0.289722	0.626099
hsa-miR-4762-3p	92.5095	-0.520735	0.491775	-1.05889	0.28965	0.626099
hsa-miR-17-3p	448.032	0.420449	0.398905	1.05401	0.291879	0.626099
hsa-miR-5787	2000.79	-0.374542	0.353144	-1.06059	0.288874	0.626099
hsa-miR-6502-5p	77.6702	-0.35293	0.341034	-1.03488	0.300724	0.63069
hsa-miR-641	122.254	0.428644	0.417015	1.02789	0.304003	0.63069
hsa-miR-15b-5p	3401.85	0.397331	0.381416	1.04173	0.297539	0.63069
hsa-miR-26a-5p	200891	0.300197	0.291623	1.0294	0.30329	0.63069
hsa-miR-3914	35.5718	-0.414519	0.399671	-1.03715	0.299665	0.63069
hsa-miR-6723-5p	473.69	-0.559013	0.546915	-1.02212	0.306724	0.63069
hsa-miR-335-5p	13337.1	-0.420383	0.409637	-1.02623	0.304782	0.63069
hsa-miR-582-5p	512.993	0.479778	0.469229	1.02248	0.306553	0.63069
hsa-miR-4262	84.4198	-0.374214	0.362628	-1.03195	0.302096	0.63069
hsa-miR-3161	110.223	-0.429402	0.410436	-1.04621	0.295464	0.63069
hsa-miR-4433a-5p	63.508	0.535098	0.512548	1.044	0.296487	0.63069
hsa-miR-6716-3p	53.6152	0.378998	0.370138	1.02394	0.305865	0.63069
hsa-miR-1292-5p	38.0685	0.388736	0.377417	1.02999	0.303014	0.63069
hsa-miR-3123	59.1651	0.518029	0.498701	1.03876	0.298917	0.63069
hsa-miR-642a-3p	30.2034	-0.405931	0.398385	-1.01894	0.308231	0.63192
hsa-miR-6868-3p	35.2333	0.456598	0.450245	1.01411	0.31053	0.63476
hsa-miR-3648	51.191	0.330845	0.330291	1.00168	0.3165	0.641701
hsa-miR-769-5p	20427.8	0.327129	0.326484	1.00198	0.316354	0.641701
hsa-miR-339-5p	54.7767	0.332877	0.332455	1.00127	0.316696	0.641701
hsa-miR-3605-5p	226.106	0.367439	0.368073	0.998277	0.318145	0.642764
hsa-miR-8072	33.8173	0.502351	0.514339	0.976693	0.328721	0.6437
hsa-miR-374a-5p	1151.67	0.2802	0.285058	0.982958	0.325628	0.6437
hsa-miR-3929	73.1806	-0.502036	0.515722	-0.973463	0.330323	0.6437
hsa-miR-1538	31.8762	0.307223	0.315811	0.972808	0.330649	0.6437
hsa-miR-874-5p	44.4461	-0.364966	0.370984	-0.98378	0.325224	0.6437
hsa-miR-5701	217.022	-0.451236	0.459125	-0.982816	0.325698	0.6437
hsa-miR-185-5p	144.346	0.337689	0.344493	0.980249	0.326963	0.6437
hsa-miR-1281	38.4978	-0.414144	0.424236	-0.976212	0.32896	0.6437
hsa-miR-1285-3p	166.779	-0.263408	0.269951	-0.975763	0.329182	0.6437
hsa-miR-6722-3p	506.758	0.493562	0.506007	0.975405	0.329359	0.6437
hsa-miR-4289	43.0551	0.305792	0.310551	0.984678	0.324782	0.6437
hsa-miR-766-3p	935.403	0.38803	0.393796	0.985359	0.324448	0.6437
hsa-miR-6868-5p	41.3447	-0.373489	0.380009	-0.982845	0.325684	0.6437
hsa-miR-6853-3p	30.2475	-0.323384	0.337758	-0.957442	0.338344	0.646856
hsa-miR-4646-3p	997.384	-0.51788	0.539484	-0.959954	0.337078	0.646856
hsa-miR-93-5p	18116.2	0.347711	0.361549	0.961725	0.336188	0.646856
hsa-miR-3913-3p	45.1621	0.291184	0.30184	0.964697	0.334696	0.646856
hsa-miR-30d-5p	64809.4	0.313072	0.327287	0.956569	0.338785	0.646856
hsa-miR-92a-3p	334616	0.408986	0.424466	0.963532	0.335281	0.646856
hsa-miR-25-3p	38296.2	0.327169	0.340608	0.960543	0.336782	0.646856
hsa-miR-3909	211.754	0.394387	0.413299	0.954241	0.339962	0.647325
hsa-miR-130a-3p	18036.4	0.371054	0.392347	0.945729	0.344287	0.650215
hsa-miR-664a-3p	176.703	-0.295283	0.311986	-0.946464	0.343912	0.650215
hsa-miR-26a-2-3p	150.995	0.33329	0.3511	0.949273	0.342482	0.650215
hsa-miR-3681-5p	56.8648	0.448445	0.475339	0.943422	0.345465	0.650673
hsa-miR-425-3p	300.201	0.307542	0.331213	0.928533	0.353131	0.661733
hsa-miR-548ap-3p	55.2431	0.314288	0.338555	0.92832	0.353241	0.661733
hsa-miR-4443	72.084	0.273019	0.295682	0.923353	0.355823	0.661791
hsa-miR-1539	854.286	-0.421551	0.461477	-0.913481	0.36099	0.661791
hsa-miR-598-3p	1095.94	0.281239	0.310018	0.90717	0.364317	0.661791
hsa-miR-638	40.9939	-0.38917	0.428123	-0.909013	0.363343	0.661791
hsa-miR-34b-5p	139.783	0.51316	0.564722	0.908695	0.363511	0.661791
hsa-miR-25-5p	160.15	0.408729	0.45181	0.904649	0.365651	0.661791
hsa-miR-6729-3p	31.7367	-0.362147	0.398528	-0.908712	0.363502	0.661791
hsa-miR-3139	36.6741	0.315157	0.345273	0.912776	0.36136	0.661791
hsa-miR-1296-5p	873.033	0.299675	0.330566	0.906551	0.364644	0.661791
hsa-miR-431-3p	508.378	-0.541997	0.596986	-0.907888	0.363937	0.661791
hsa-miR-4323	62.1507	0.357705	0.394083	0.907688	0.364043	0.661791
hsa-miR-328-3p	1147.94	0.302186	0.333629	0.905756	0.365065	0.661791
hsa-miR-3200-3p	499.758	0.353956	0.383162	0.923776	0.355603	0.661791
hsa-miR-3940-3p	56.784	-0.378397	0.419344	-0.902353	0.366869	0.662271
hsa-miR-548ad-5p	56.7996	0.331581	0.373528	0.8877	0.374702	0.671181
hsa-miR-140-3p	1898.06	0.257044	0.289449	0.888043	0.374517	0.671181
hsa-miR-4669	42.8396	-0.480373	0.540167	-0.889304	0.37384	0.671181
hsa-miR-126-5p	1823.98	0.328713	0.372605	0.882202	0.377667	0.672845
hsa-miR-642b-5p	50.9768	-0.440038	0.499704	-0.880598	0.378536	0.672845
hsa-miR-31-5p	1197.24	0.339801	0.385468	0.881528	0.378032	0.672845
hsa-miR-6807-5p	150.786	-0.329619	0.379693	-0.86812	0.385328	0.678856
hsa-miR-331-5p	89.7827	0.333663	0.383443	0.870175	0.384205	0.678856
hsa-miR-4306	31.7758	0.320653	0.369751	0.867214	0.385825	0.678856
hsa-miR-199a-5p	129.368	0.362211	0.415202	0.872372	0.383005	0.678856
hsa-miR-148a-3p	62377.2	0.415757	0.481064	0.864246	0.387453	0.679999
hsa-miR-6895-3p	51.6428	-0.426482	0.499587	-0.85367	0.393288	0.681634
hsa-miR-3605-3p	228.236	0.393566	0.458223	0.858896	0.390398	0.681634
hsa-miR-652-3p	722.81	0.326903	0.38136	0.857204	0.391332	0.681634
hsa-miR-6824-3p	149.279	-0.324792	0.377694	-0.859935	0.389825	0.681634
hsa-miR-501-3p	8034.56	0.372918	0.436359	0.854613	0.392765	0.681634
hsa-miR-532-3p	162.162	0.326052	0.383414	0.85039	0.395108	0.683085
hsa-miR-196b-5p	210.043	0.551275	0.651917	0.845623	0.397763	0.685969
hsa-miR-4516	750.444	-0.375942	0.445514	-0.843838	0.39876	0.685986
hsa-miR-10b-5p	40158.5	-0.532869	0.634375	-0.839991	0.400914	0.687988
hsa-miR-589-3p	153.496	0.377267	0.450584	0.837284	0.402433	0.688893
hsa-miR-3195	5265.77	0.210424	0.253154	0.831207	0.405857	0.693048
hsa-miR-190b	61.5587	-0.413066	0.498735	-0.828228	0.407541	0.694219
hsa-miR-186-5p	29561	0.277357	0.340916	0.813562	0.415896	0.705054
hsa-miR-95-3p	922.751	-0.206997	0.254451	-0.813501	0.415931	0.705054
hsa-miR-6844	105.234	-0.303658	0.379397	-0.80037	0.423497	0.705537
hsa-miR-548o-3p	137.78	0.321373	0.400238	0.802955	0.422001	0.705537
hsa-miR-6500-5p	67.3661	0.354297	0.438497	0.807981	0.419101	0.705537
hsa-miR-423-5p	9087.13	0.326185	0.406365	0.80269	0.422154	0.705537
hsa-miR-6511b-3p	42.8563	0.261182	0.326456	0.800055	0.423679	0.705537
hsa-miR-3184-3p	9082.67	0.323552	0.404987	0.798919	0.424338	0.705537
hsa-miR-34c-3p	105.517	-0.512137	0.636505	-0.804608	0.421046	0.705537
hsa-miR-5581-3p	37.0426	0.320186	0.397068	0.806377	0.420025	0.705537
hsa-miR-500a-3p	7626.51	0.369479	0.467082	0.791036	0.428923	0.711362
hsa-miR-425-5p	3908.69	0.271926	0.344495	0.789346	0.42991	0.711362
hsa-miR-29a-3p	819.404	0.317973	0.404605	0.785885	0.431935	0.711362
hsa-miR-374b-3p	213.501	0.297727	0.378509	0.786576	0.43153	0.711362
hsa-miR-135a-5p	11834.6	0.308506	0.393688	0.783631	0.433256	0.711852
hsa-miR-133a-3p	182.893	-0.477667	0.612789	-0.779497	0.435687	0.714157
hsa-miR-374a-3p	2310.93	0.245996	0.316905	0.776246	0.437604	0.715611
hsa-miR-27b-3p	200506	0.25482	0.330212	0.771686	0.4403	0.71833
hsa-miR-485-3p	112.844	-0.434726	0.564657	-0.769893	0.441363	0.718378
hsa-miR-6771-3p	32.5798	-0.361905	0.473725	-0.763956	0.444894	0.719339
hsa-miR-8078	37.3823	0.33836	0.443507	0.76292	0.445511	0.719339
hsa-miR-4726-5p	93.9256	0.449287	0.586641	0.765863	0.443758	0.719339
hsa-miR-6772-3p	33.0465	-0.311875	0.409315	-0.761944	0.446093	0.719339
hsa-miR-6822-5p	139.244	-0.284066	0.37413	-0.759271	0.44769	0.720242
hsa-miR-887-3p	2829.54	0.227787	0.305097	0.746605	0.455302	0.72731
hsa-miR-188-3p	31.2373	0.388916	0.520004	0.747909	0.454515	0.72731
hsa-miR-3620-3p	37.7648	-0.271635	0.363904	-0.746447	0.455397	0.72731
hsa-miR-6768-5p	31.0087	-0.296546	0.398046	-0.745004	0.456269	0.72731
hsa-miR-181b-2-3p	43.1132	0.321452	0.432585	0.743094	0.457425	0.727483
hsa-miR-342-3p	4373.31	0.25764	0.353446	0.728937	0.46604	0.737808
hsa-miR-149-5p	7669.64	0.302062	0.414147	0.729359	0.465782	0.737808
hsa-miR-30c-2-3p	305.508	0.237891	0.328257	0.724707	0.468632	0.740225
hsa-miR-5010-3p	65.0717	-0.266616	0.368954	-0.722628	0.469908	0.740559
hsa-miR-572	31.8578	0.237408	0.331976	0.715134	0.474526	0.742868
hsa-miR-760	137.994	0.242955	0.341425	0.711591	0.476718	0.742868
hsa-miR-152-3p	965.474	-0.299487	0.420025	-0.713022	0.475832	0.742868
hsa-miR-96-5p	47.3969	-0.444079	0.622131	-0.713803	0.475349	0.742868
hsa-miR-885-5p	32.182	-0.426214	0.596469	-0.714563	0.474879	0.742868
hsa-miR-4454	1477.01	-0.301181	0.425877	-0.707201	0.479441	0.74544
hsa-miR-642a-5p	66.1645	-0.308559	0.440103	-0.701105	0.483237	0.749665
hsa-miR-767-5p	152.543	-0.35483	0.511993	-0.693036	0.488287	0.755811
hsa-miR-548au-5p	29.4729	0.267619	0.389659	0.686804	0.492206	0.760185
hsa-miR-6819-3p	119.026	-0.399866	0.586339	-0.68197	0.495258	0.76179
hsa-miR-326	94.8694	0.308088	0.453101	0.679954	0.496533	0.76179
hsa-miR-224-5p	806.434	0.400051	0.587118	0.68138	0.495631	0.76179
hsa-miR-3928-3p	41.5067	0.225899	0.336085	0.672147	0.50149	0.764332
hsa-miR-576-5p	162.96	0.268446	0.397627	0.675119	0.4996	0.764332
hsa-miR-184	63.2319	-0.341387	0.507249	-0.673016	0.500937	0.764332
hsa-miR-219a-1-3p	1779.11	0.296721	0.443147	0.669577	0.503128	0.76515
hsa-miR-1269a	686.41	0.425142	0.639592	0.664708	0.506238	0.768199
hsa-miR-6781-5p	32.3037	0.239598	0.363613	0.658937	0.509936	0.772125
hsa-miR-106b-3p	393.411	0.188575	0.287953	0.654881	0.512544	0.772708
hsa-miR-20a-3p	93.1415	0.255893	0.389812	0.656453	0.511533	0.772708
hsa-miR-548ah-5p	141.098	0.285025	0.437906	0.650881	0.515123	0.773241
hsa-miR-6809-5p	94.2327	0.247964	0.380722	0.651298	0.514854	0.773241
hsa-miR-182-5p	5840.44	-0.408212	0.634753	-0.643104	0.520157	0.778125
hsa-miR-548ba	31.8326	-0.293532	0.456933	-0.642396	0.520616	0.778125
hsa-miR-18a-5p	1012.97	0.286382	0.450273	0.636019	0.524764	0.780288
hsa-miR-6886-5p	30.4562	0.247842	0.390305	0.634995	0.525431	0.780288
hsa-miR-2682-3p	99.4378	0.23549	0.369249	0.637755	0.523633	0.780288
hsa-miR-5699-5p	118.159	-0.254609	0.406989	-0.62559	0.531584	0.783046
hsa-miR-628-5p	494.872	0.211648	0.336551	0.628874	0.529431	0.783046
hsa-miR-181a-2-3p	11155.7	0.228957	0.366174	0.625268	0.531796	0.783046
hsa-miR-361-3p	232.413	0.243818	0.388825	0.627064	0.530618	0.783046
hsa-miR-450a-5p	272.024	0.307665	0.499058	0.616492	0.53757	0.788515
hsa-miR-324-5p	368.107	0.197934	0.32123	0.616176	0.537778	0.788515
hsa-miR-501-5p	68.0185	0.263326	0.430347	0.611893	0.540609	0.790996
hsa-miR-6737-5p	278.739	-0.396642	0.65061	-0.609646	0.542096	0.791506
hsa-miR-320a	5052.54	0.176631	0.292489	0.603891	0.545916	0.795413
hsa-miR-101-5p	76.6868	0.319654	0.531809	0.60107	0.547794	0.796349
hsa-miR-1226-3p	1073.63	0.237779	0.39664	0.599484	0.54885	0.796349
hsa-miR-629-3p	52.6577	-0.259912	0.43517	-0.597266	0.55033	0.796832
hsa-miR-454-3p	5261.98	0.233264	0.392455	0.594373	0.552263	0.797968
hsa-miR-502-3p	185.717	0.244009	0.413973	0.589431	0.555572	0.799426
hsa-miR-103b	40449.7	0.150335	0.254967	0.589625	0.555442	0.799426
hsa-miR-92a-1-5p	69.5139	0.263849	0.449785	0.586612	0.557465	0.800492
hsa-miR-362-5p	177.383	0.288042	0.493178	0.584054	0.559184	0.801305
hsa-miR-103a-3p	40011.7	0.148834	0.256504	0.580242	0.561751	0.803328
hsa-miR-3155b	39.9048	-0.233688	0.408622	-0.571893	0.567394	0.809002
hsa-miR-105-5p	43.9678	-0.277583	0.486195	-0.570929	0.568048	0.809002
hsa-miR-1268a	85.3267	0.167477	0.295612	0.566541	0.571026	0.811581
hsa-miR-604	199.889	0.250413	0.443998	0.563994	0.572758	0.812381
hsa-miR-130b-3p	16923.9	0.268247	0.477224	0.562099	0.574049	0.812554
hsa-miR-216a-3p	94.2686	-0.305159	0.574595	-0.531086	0.595359	0.817809
hsa-miR-338-3p	891.182	0.186863	0.349543	0.534593	0.592931	0.817809
hsa-miR-3651	32.4936	0.226536	0.418491	0.541316	0.58829	0.817809
hsa-miR-1247-5p	2707.46	0.329023	0.604444	0.544341	0.586207	0.817809
hsa-miR-2467-5p	1380.01	-0.319255	0.581237	-0.549268	0.582822	0.817809
hsa-miR-663a	56.0233	0.164509	0.307101	0.535685	0.592177	0.817809
hsa-miR-1237-5p	151.019	-0.173063	0.321529	-0.538249	0.590405	0.817809
hsa-miR-4284	2881.53	0.230306	0.433713	0.53101	0.595412	0.817809
hsa-miR-6722-5p	777.836	0.338229	0.636161	0.531672	0.594953	0.817809
hsa-miR-660-5p	2014.92	0.249798	0.454938	0.549081	0.58295	0.817809
hsa-miR-1185-5p	60.4594	-0.336023	0.631787	-0.53186	0.594823	0.817809
hsa-miR-4461	116.315	-0.300454	0.548643	-0.547631	0.583945	0.817809
hsa-miR-19b-3p	3876.58	0.197121	0.368105	0.535502	0.592303	0.817809
hsa-miR-296-3p	78.2435	0.218255	0.395465	0.551894	0.581021	0.817809
hsa-miR-3177-3p	137.61	0.234001	0.431155	0.54273	0.587316	0.817809
hsa-miR-4715-3p	29.1643	-0.231667	0.438037	-0.528876	0.596892	0.818224
hsa-miR-500b-3p	46.1539	0.250403	0.480372	0.521268	0.60218	0.823848
hsa-miR-132-5p	289.774	0.169778	0.327357	0.518632	0.604017	0.824739
hsa-miR-183-5p	1095.61	-0.320825	0.628064	-0.510816	0.60948	0.830566
hsa-miR-22-5p	30.3624	0.233742	0.460457	0.507631	0.611712	0.831977
hsa-miR-18a-3p	100.752	0.239511	0.477373	0.501727	0.615859	0.832656
hsa-miR-6842-3p	36.7632	0.181291	0.359166	0.504757	0.613729	0.832656
hsa-miR-625-3p	217.393	-0.267358	0.534609	-0.500101	0.617004	0.832656
hsa-miR-107	792.896	0.164063	0.327717	0.500624	0.616636	0.832656
hsa-miR-3922-5p	73.7846	0.288675	0.58479	0.49364	0.621561	0.83718
hsa-miR-138-5p	327.77	-0.258694	0.529085	-0.488945	0.624881	0.838402
hsa-miR-1180-5p	209.7	-0.301353	0.61608	-0.489146	0.624739	0.838402
hsa-miR-33b-5p	73.1288	0.237591	0.494234	0.480727	0.630711	0.844594
hsa-miR-500a-5p	55.4847	0.232542	0.490916	0.47369	0.635721	0.849665
hsa-miR-140-5p	372.895	0.14827	0.326181	0.454562	0.649424	0.851999
hsa-miR-3529-3p	942.753	-0.249452	0.547687	-0.455464	0.648775	0.851999
hsa-miR-421	7330.72	0.210395	0.465895	0.451593	0.651562	0.851999
hsa-miR-423-3p	28579.3	0.166774	0.372813	0.447341	0.654629	0.851999
hsa-miR-146b-3p	57.04	0.156409	0.33354	0.468937	0.639115	0.851999
hsa-miR-625-5p	323.856	-0.254431	0.556322	-0.457345	0.647423	0.851999
hsa-miR-9-3p	1423.69	-0.233176	0.52032	-0.448141	0.654052	0.851999
hsa-miR-6769a-3p	75.9502	0.187159	0.404696	0.462467	0.643746	0.851999
hsa-miR-139-5p	177.491	0.26952	0.589917	0.456877	0.64776	0.851999
hsa-miR-1249-3p	156.864	0.165375	0.362172	0.456619	0.647945	0.851999
hsa-miR-4423-3p	98.6354	-0.17616	0.384358	-0.458322	0.646721	0.851999
hsa-miR-330-5p	1146.83	0.153728	0.330508	0.465126	0.641841	0.851999
hsa-miR-592	71.9061	-0.213138	0.470723	-0.452789	0.650701	0.851999
hsa-miR-670-5p	93.8099	0.158956	0.353127	0.450138	0.652611	0.851999
hsa-miR-548e-5p	53.5341	0.137927	0.31375	0.439608	0.660221	0.852888
hsa-miR-24-3p	2172.63	0.21704	0.491452	0.44163	0.658757	0.852888
hsa-miR-330-3p	775.492	-0.148596	0.337589	-0.44017	0.659814	0.852888
hsa-miR-3065-5p	585.592	0.186028	0.422206	0.440611	0.659495	0.852888
hsa-miR-195-5p	74.7705	0.169339	0.388409	0.435981	0.662851	0.854696
hsa-miR-7704	4481.13	-0.163865	0.380967	-0.43013	0.667101	0.858584
hsa-miR-6089	179.56	0.192589	0.451762	0.426306	0.669885	0.860573
hsa-miR-7-5p	940.792	-0.231204	0.551026	-0.419588	0.674787	0.865134
hsa-miR-6747-3p	53.0324	0.141444	0.338359	0.418031	0.675925	0.865134
hsa-miR-6126	263.553	0.16994	0.411019	0.41346	0.67927	0.867817
hsa-miR-200b-3p	152.461	-0.202495	0.49282	-0.410891	0.681152	0.868626
hsa-miR-891a-5p	108.379	-0.25303	0.622544	-0.406445	0.684416	0.86924
hsa-miR-504-5p	2230.95	-0.182493	0.44742	-0.407878	0.683363	0.86924
hsa-miR-216b-5p	1580.2	-0.243178	0.600255	-0.405124	0.685386	0.86924
hsa-miR-3118	36.7131	0.256197	0.648771	0.394895	0.69292	0.877194
hsa-miR-548av-5p	429.668	0.159091	0.406415	0.391449	0.695466	0.878816
hsa-miR-1910-5p	38.9646	-0.160234	0.417574	-0.383727	0.701181	0.882828
hsa-miR-874-3p	1245.49	0.182838	0.474809	0.385077	0.70018	0.882828
hsa-miR-126-3p	124.974	0.133816	0.351156	0.381073	0.703149	0.883704
hsa-miR-193a-3p	86.4512	0.243133	0.64203	0.378694	0.704915	0.884325
hsa-miR-374b-5p	817.021	-0.123226	0.330114	-0.373283	0.708938	0.885781
hsa-miR-4497	3686.48	-0.13511	0.363248	-0.371948	0.709931	0.885781
hsa-miR-193a-5p	94.2933	0.24258	0.64825	0.374208	0.70825	0.885781
hsa-miR-217	181.092	-0.212042	0.572653	-0.37028	0.711174	0.885781
hsa-miR-548k	427.155	0.14941	0.406386	0.367656	0.71313	0.886628
hsa-miR-1287-5p	100.035	0.140807	0.388434	0.362498	0.71698	0.888237
hsa-miR-374c-3p	803.239	-0.120202	0.331316	-0.362801	0.716753	0.888237
hsa-miR-2277-5p	198.618	0.150601	0.419636	0.358884	0.719682	0.888451
hsa-miR-499b-3p	1546.63	0.14236	0.396714	0.358848	0.719709	0.888451
hsa-miR-7706	2076.78	0.157282	0.448329	0.350818	0.725725	0.893138
hsa-miR-296-5p	429.39	0.169767	0.484565	0.35035	0.726076	0.893138
hsa-miR-320c	40.705	0.151812	0.436377	0.347891	0.727922	0.893826
hsa-miR-6835-5p	110.819	0.103657	0.303386	0.341666	0.732602	0.895812
hsa-miR-93-3p	833.355	0.131311	0.385531	0.340599	0.733406	0.895812
hsa-miR-1298-5p	262.483	0.223651	0.651611	0.343227	0.731427	0.895812
hsa-miR-4662b	74.9182	0.179041	0.528584	0.338717	0.734823	0.895968
hsa-miR-670-3p	9813.55	0.111033	0.329886	0.33658	0.736434	0.89636
hsa-miR-6512-3p	594.304	0.145278	0.452766	0.320868	0.74831	0.901344
hsa-miR-488-5p	237.025	-0.176531	0.539883	-0.32698	0.743683	0.901344
hsa-miR-335-3p	35809.9	0.168274	0.518188	0.324735	0.745381	0.901344
hsa-miR-216b-3p	222.392	-0.19284	0.590177	-0.326749	0.743858	0.901344
hsa-miR-338-5p	150.106	-0.117462	0.365231	-0.32161	0.747748	0.901344
hsa-miR-4662a-5p	73.5861	0.169962	0.528898	0.321352	0.747944	0.901344
hsa-miR-301a-5p	161.95	0.138877	0.437991	0.317077	0.751185	0.903241
hsa-miR-130b-5p	7127.27	0.150869	0.47955	0.314605	0.753062	0.903934
hsa-miR-4451	37.7669	0.165682	0.535042	0.309662	0.756818	0.905316
hsa-miR-3656	215.962	-0.11384	0.366994	-0.310196	0.756412	0.905316
hsa-miR-4417	62.0142	-0.134512	0.452756	-0.297095	0.766394	0.913626
hsa-miR-3661	38.2484	0.123678	0.415193	0.297881	0.765794	0.913626
hsa-miR-3184-5p	4489.51	0.111184	0.383288	0.290079	0.771756	0.916872
hsa-miR-132-3p	3458.91	0.12268	0.421583	0.290997	0.771053	0.916872
hsa-miR-576-3p	76.9111	0.0892696	0.312409	0.285746	0.775073	0.917676
hsa-miR-448	52.2785	0.18413	0.64166	0.286959	0.774143	0.917676
hsa-miR-141-3p	38.1297	-0.133119	0.485254	-0.274329	0.783832	0.926468
hsa-miR-574-3p	1054.77	0.131661	0.49484	0.266068	0.790187	0.932394
hsa-miR-488-3p	194.232	-0.138624	0.535034	-0.259093	0.795563	0.933981
hsa-miR-5683	227.826	-0.13135	0.506246	-0.259458	0.795282	0.933981
hsa-miR-5002-5p	58.7245	0.134979	0.519846	0.259652	0.795132	0.933981
hsa-miR-2682-5p	117.598	0.119068	0.466333	0.255329	0.798469	0.934964
hsa-miR-3074-5p	8799.03	0.127634	0.501464	0.254523	0.799091	0.934964
hsa-miR-6720-3p	147.41	0.0953719	0.379737	0.251153	0.801696	0.936435
hsa-miR-4668-3p	31.3098	-0.117867	0.490254	-0.240421	0.810004	0.944552
hsa-miR-452-5p	114.674	0.14641	0.615507	0.237869	0.811983	0.945273
hsa-miR-491-5p	44.3868	-0.0944559	0.400218	-0.236011	0.813424	0.945367
hsa-miR-3117-3p	67.9418	-0.12167	0.526141	-0.231251	0.81712	0.948077
hsa-miR-7106-5p	186.103	-0.0898772	0.394005	-0.228112	0.819559	0.949323
hsa-miR-101-3p	7683.78	0.0936113	0.425215	0.22015	0.825754	0.950194
hsa-miR-6841-5p	47.7468	-0.0894704	0.399034	-0.224217	0.822588	0.950194
hsa-miR-4466	173.561	0.108333	0.485471	0.223151	0.823418	0.950194
hsa-miR-6733-3p	425.271	-0.0697178	0.316731	-0.220117	0.82578	0.950194
hsa-miR-494-3p	150.586	-0.130725	0.619662	-0.210962	0.832917	0.955243
hsa-miR-1275	658.702	0.0695191	0.327418	0.212325	0.831853	0.955243
hsa-miR-6863	2095.78	-0.0950147	0.65179	-0.145775	0.884099	0.95671
hsa-miR-340-5p	36792	0.0843473	0.499325	0.168923	0.865857	0.95671
hsa-miR-4738-5p	29.4005	0.077862	0.559903	0.139063	0.8894	0.95671
hsa-miR-4479	230.068	0.0504885	0.335504	0.150486	0.880381	0.95671
hsa-miR-590-3p	307.477	0.0526209	0.325122	0.16185	0.871424	0.95671
hsa-miR-23b-3p	5410.92	0.0699737	0.395346	0.176993	0.859514	0.95671
hsa-miR-628-3p	317.927	-0.0524748	0.369057	-0.142186	0.886933	0.95671
hsa-miR-887-5p	328.348	-0.0394446	0.290889	-0.1356	0.892137	0.95671
hsa-miR-1913	331.554	-0.0718407	0.42164	-0.170384	0.864708	0.95671
hsa-miR-135b-3p	72.4619	-0.0849143	0.529472	-0.160375	0.872585	0.95671
hsa-miR-510-3p	33.5253	-0.0850519	0.458389	-0.185545	0.852802	0.95671
hsa-miR-320d	69.9447	0.0801713	0.513923	0.155999	0.876034	0.95671
hsa-miR-1908-5p	268.214	-0.0595793	0.384286	-0.155039	0.876791	0.95671
hsa-miR-6742-5p	252.757	0.0822804	0.405629	0.202847	0.839255	0.95671
hsa-miR-3174	38.0865	0.0754012	0.489641	0.153993	0.877615	0.95671
hsa-miR-499a-5p	34.0766	0.0661993	0.356966	0.18545	0.852876	0.95671
hsa-miR-219b-5p	7511.78	-0.102846	0.586494	-0.175358	0.860799	0.95671
hsa-miR-129-5p	5847.59	-0.080072	0.403563	-0.198412	0.842722	0.95671
hsa-miR-301b-5p	52.1774	0.0756793	0.477398	0.158525	0.874043	0.95671
hsa-miR-135b-5p	260.277	-0.109189	0.550414	-0.198376	0.842751	0.95671
hsa-miR-3687	51.7536	0.0687101	0.433193	0.158613	0.873974	0.95671
hsa-miR-5699-3p	35.1961	0.0686675	0.400487	0.17146	0.863862	0.95671
hsa-miR-2116-3p	30.5544	-0.0600917	0.440854	-0.136307	0.891578	0.95671
hsa-miR-219a-2-3p	6872.04	-0.102786	0.595051	-0.172734	0.86286	0.95671
hsa-miR-212-5p	2325.3	-0.084257	0.414539	-0.203255	0.838936	0.95671
hsa-miR-1181	2488.02	0.0675063	0.467426	0.144421	0.885168	0.95671
hsa-miR-4508	559.397	-0.0643702	0.414496	-0.155297	0.876587	0.95671
hsa-miR-200a-3p	34.3641	-0.0779503	0.488467	-0.159582	0.873211	0.95671
hsa-miR-3615	290.447	0.0810858	0.468336	0.173136	0.862545	0.95671
hsa-miR-1298-3p	32.6052	-0.0955691	0.573913	-0.166522	0.867746	0.95671
hsa-miR-301b-3p	43904.2	0.0657487	0.482158	0.136363	0.891534	0.95671
hsa-miR-3194-5p	59.2995	-0.0953533	0.557314	-0.171094	0.86415	0.95671
hsa-miR-1266-3p	41.2592	-0.0601811	0.449051	-0.134019	0.893388	0.95671
hsa-miR-29b-3p	58.0357	0.0862603	0.431855	0.199743	0.841681	0.95671
hsa-miR-500b-5p	66.4631	0.0806493	0.451351	0.178684	0.858186	0.95671
hsa-miR-4530	36.2896	0.0737366	0.495225	0.148895	0.881636	0.95671
hsa-miR-152-5p	63.4995	0.0668057	0.38543	0.173327	0.862394	0.95671
hsa-miR-145-5p	60.0554	-0.0927278	0.479265	-0.193479	0.846584	0.95671
hsa-miR-216a-5p	543.261	-0.115261	0.586172	-0.196634	0.844114	0.95671
hsa-miR-873-5p	121.576	0.0526565	0.336617	0.156428	0.875696	0.95671
hsa-miR-629-5p	233.574	-0.0667136	0.452612	-0.147397	0.882819	0.95671
hsa-miR-3196	546.641	0.0777491	0.401671	0.193564	0.846517	0.95671
hsa-miR-4791	29.8071	0.0545341	0.363993	0.149822	0.880905	0.95671
hsa-miR-8069	62.1629	0.0575837	0.45006	0.127947	0.898191	0.959745
hsa-miR-3622a-5p	111.814	0.0387641	0.305362	0.126945	0.898984	0.959745
hsa-miR-378a-3p	642.821	-0.0639462	0.519452	-0.123103	0.902025	0.961515
hsa-miR-6871-3p	49.1665	-0.0430834	0.388136	-0.111001	0.911616	0.962169
hsa-miR-532-5p	3427.64	0.0465641	0.437222	0.1065	0.915186	0.962169
hsa-miR-4488	2554.85	-0.0353789	0.329069	-0.107512	0.914383	0.962169
hsa-miR-454-5p	460.22	0.0500371	0.460276	0.108711	0.913432	0.962169
hsa-miR-4787-5p	81.5841	0.0367715	0.354843	0.103628	0.917465	0.962169
hsa-miR-320e	138.541	-0.0537559	0.49665	-0.108237	0.913808	0.962169
hsa-miR-340-3p	2146.43	0.0580028	0.491893	0.117918	0.906133	0.962169
hsa-miR-342-5p	129.833	0.0419691	0.385413	0.108894	0.913287	0.962169
hsa-miR-301a-3p	42837.8	0.0443303	0.424911	0.104328	0.916909	0.962169
hsa-miR-4691-3p	71.0516	-0.0329567	0.319596	-0.10312	0.917868	0.962169
hsa-miR-4760-3p	229.026	0.0401905	0.33674	0.119352	0.904997	0.962169
hsa-miR-3065-3p	853.632	0.0386843	0.404013	0.09575	0.923719	0.966845
hsa-miR-124-3p	4749.59	-0.0489528	0.547891	-0.0893477	0.928806	0.970707
hsa-miR-577	34.3222	0.0368033	0.438174	0.0839926	0.933062	0.973691
hsa-miR-486-5p	5606.53	-0.0492466	0.599889	-0.0820928	0.934573	0.973805
hsa-miR-212-3p	344.33	-0.0270523	0.336895	-0.0802989	0.936	0.973832
hsa-miR-215-5p	74.5509	0.0287463	0.371911	0.0772937	0.93839	0.974859
hsa-miR-4467	36.4302	0.0266922	0.368818	0.0723722	0.942306	0.977466
hsa-miR-218-5p	10858.8	0.0274274	0.406837	0.067416	0.946251	0.980096
hsa-miR-365a-3p	358.396	-0.0345959	0.528872	-0.0654146	0.947844	0.980285
hsa-miR-1246	45440.1	-0.0286266	0.564026	-0.0507541	0.959521	0.985899
hsa-miR-4649-5p	42.1033	-0.0247932	0.485547	-0.0510624	0.959276	0.985899
hsa-miR-137	86.131	-0.0216379	0.451586	-0.0479152	0.961784	0.985899
hsa-miR-634	30.1209	0.0272763	0.524817	0.0519731	0.95855	0.985899
hsa-miR-2276-3p	40.2433	0.0210866	0.431578	0.0488593	0.961031	0.985899
hsa-miR-204-5p	4591.29	0.0262296	0.484216	0.0541692	0.9568	0.985899
hsa-miR-19a-3p	2090.44	-0.018148	0.396169	-0.0458088	0.963463	0.98602
hsa-miR-6805-5p	385.435	0.0188584	0.426591	0.0442072	0.964739	0.98602
hsa-miR-548e-3p	227.204	0.0146505	0.351311	0.0417024	0.966736	0.98661
hsa-miR-651-5p	35.5173	0.0139997	0.371815	0.0376524	0.969965	0.987618
hsa-miR-6505-5p	50.153	0.0150021	0.406577	0.0368987	0.970566	0.987618
hsa-miR-128-3p	13730.5	-0.0139836	0.40683	-0.034372	0.972581	0.988221
hsa-miR-6086	39.45	-0.00885292	0.384161	-0.0230448	0.981615	0.994785
hsa-miR-7-1-3p	104.321	-0.0105134	0.463484	-0.0226833	0.981903	0.994785
hsa-miR-486-3p	7558.32	-0.0081297	0.598325	-0.0135874	0.989159	0.994885
hsa-miR-219b-3p	2870.27	-0.00926252	0.549791	-0.0168474	0.986558	0.994885
hsa-miR-9-5p	152197	0.0098408	0.552177	0.0178218	0.985781	0.994885
hsa-miR-219a-5p	2897.47	-0.00749675	0.546239	-0.0137243	0.98905	0.994885
hsa-miR-124-5p	306.969	0.00983776	0.571887	0.0172023	0.986275	0.994885
hsa-miR-4442	48.505	-0.00347664	0.34281	-0.0101416	0.991908	0.994975
hsa-miR-4492	587.05	0.0040497	0.409591	0.00988717	0.992111	0.994975
hsa-miR-5094	158.356	0.00168342	0.318336	0.00528819	0.995781	0.997215
hsa-miR-3607-3p	326.309	-0.000950728	0.316446	-0.0030044	0.997603	0.997603
hsa-miR-6887-3p	6.16676	-0.674742	0.576836	-1.16973	0.24211	NA
hsa-miR-6721-5p	11.973	-0.228684	0.404822	-0.5649	0.572142	NA
hsa-miR-4524b-5p	3.97021	-0.865813	0.582048	-1.48753	0.136875	NA
hsa-miR-371b-3p	2.15663	-0.603569	0.651206	-0.926848	0.354006	NA
hsa-miR-597-3p	6.70547	0.20859	0.493585	0.422602	0.672586	NA
hsa-miR-1293	3.10158	-0.732892	0.597284	-1.22704	0.219807	NA
hsa-miR-499a-3p	11.7565	1.44297	0.541661	2.66397	0.00772241	NA
hsa-miR-6821-3p	10.6766	-0.182488	0.531138	-0.343579	0.731163	NA
hsa-miR-651-3p	0.74149	-0.490665	0.619032	-0.792633	0.427992	NA
hsa-miR-371a-3p	13.0349	-0.171837	0.434206	-0.395749	0.69229	NA
hsa-miR-6750-3p	5.53358	0.053451	0.53761	0.0994234	0.920802	NA
hsa-miR-211-5p	3.08135	0.182012	0.600333	0.303186	0.761748	NA
hsa-miR-19b-1-5p	10.8471	0.792519	0.50211	1.57838	0.114479	NA
hsa-miR-548p	4.57599	0.448009	0.542551	0.825745	0.408949	NA
hsa-miR-766-5p	10.1982	-0.0357206	0.500288	-0.0714001	0.943079	NA
hsa-miR-98-3p	0.310607	0.652731	0.516386	1.26404	0.206217	NA
hsa-miR-129-2-3p	4059.73	-0.931074	0.454314	-2.04941	NA	NA
hsa-miR-4771	1.77771	-0.0839174	0.645334	-0.130037	0.896537	NA
hsa-miR-4684-5p	2.69438	-0.316372	0.644434	-0.490931	0.623475	NA
hsa-miR-6827-5p	3.56255	-1.06578	0.639117	-1.66757	0.0954002	NA
hsa-miR-3132	1.28142	-0.942676	0.649922	-1.45044	0.146935	NA
hsa-miR-644a	1.15525	-1.26322	0.647725	-1.95024	0.0511471	NA
hsa-miR-4768-5p	7.74654	0.681303	0.510247	1.33524	0.181797	NA
hsa-miR-3142	1.25552	0.107568	0.645981	0.166519	0.867749	NA
hsa-miR-4800-3p	14.9919	0.197145	0.428478	0.460104	0.645441	NA
hsa-miR-6825-5p	2.27386	-0.983505	0.639739	-1.53735	0.124207	NA
hsa-miR-548a-5p	4.18391	-0.0434312	0.520768	-0.0833985	0.933535	NA
hsa-miR-6813-3p	1.72159	-0.898003	0.638661	-1.40607	0.159703	NA
hsa-miR-3681-3p	3.79806	-1.02418	0.619655	-1.65283	0.0983664	NA
hsa-miR-1537-5p	3.76001	-1.00102	0.62512	-1.60133	0.109304	NA
hsa-miR-4714-5p	2.72382	-0.6853	0.625875	-1.09495	0.27354	NA
hsa-miR-1238-3p	6.27751	-0.812103	0.509382	-1.59429	0.11087	NA
hsa-miR-6880-3p	12.2047	-0.271168	0.427353	-0.63453	0.525735	NA
hsa-miR-4432	1.33527	-0.408329	0.650912	-0.627318	0.530451	NA
hsa-miR-495-5p	1.4941	-0.276535	0.649509	-0.42576	0.670283	NA
hsa-miR-1238-5p	0.782	-0.596602	0.64581	-0.923804	0.355589	NA
hsa-miR-6839-5p	3.88765	-1.24375	0.645868	-1.92571	0.0541404	NA
hsa-miR-7107-3p	2.85317	-0.567646	0.637513	-0.890407	0.373247	NA
hsa-miR-6738-5p	3.19721	-0.0180652	0.618289	-0.0292181	0.976691	NA
hsa-miR-4523	22.4064	-0.0526815	0.406521	-0.129591	0.89689	NA
hsa-miR-520h	0.920755	0.558355	0.645584	0.864883	0.387103	NA
hsa-miR-4307	2.70993	-1.62217	0.639007	-2.53857	0.0111305	NA
hsa-miR-3670	2.27401	-0.979633	0.619752	-1.58069	0.11395	NA
hsa-miR-6741-3p	19.5018	0.330434	0.38181	0.86544	0.386797	NA
hsa-miR-4477a	1.98358	-0.363069	0.646921	-0.561227	0.574643	NA
hsa-miR-525-3p	0.132136	-0.303582	0.398482	-0.761845	0.446152	NA
hsa-miR-639	1.74524	-0.806066	0.633948	-1.2715	0.20355	NA
hsa-miR-4777-3p	6.97597	-1.27748	0.57177	-2.23426	0.025466	NA
hsa-miR-5582-3p	3.35377	-0.0245245	0.606439	-0.0404401	0.967742	NA
hsa-miR-3660	12.1755	0.364175	0.586631	0.620791	0.534737	NA
hsa-miR-6504-5p	0.845668	-0.379744	0.647822	-0.586187	0.55775	NA
hsa-miR-4756-3p	0.621415	-0.587095	0.593254	-0.989618	0.322361	NA
hsa-miR-4666a-5p	4.31299	0.139266	0.535179	0.260223	0.794691	NA
hsa-miR-127-5p	75.9096	0.00312628	0.61892	0.00505118	NA	NA
hsa-miR-146b-5p	3144.25	0.119545	0.383086	0.312057	NA	NA
hsa-miR-6760-3p	5.26178	-0.119073	0.523431	-0.227485	0.820047	NA
hsa-miR-548au-3p	0.817397	-0.385741	0.64964	-0.593776	0.552662	NA
hsa-miR-376a-3p	79.2995	-0.0628284	0.650051	-0.0966515	NA	NA
hsa-miR-5591-3p	1.01205	0.0263915	0.647741	0.0407439	0.9675	NA
hsa-miR-4720-5p	3.33005	-0.635095	0.577509	-1.09971	0.271457	NA
hsa-miR-6514-5p	18.3495	0.0586466	0.432926	0.135466	0.892244	NA
hsa-miR-7157-3p	3.16324	-0.567796	0.588763	-0.964389	0.334851	NA
hsa-miR-7156-5p	5.96446	-0.0770594	0.614889	-0.125323	0.900268	NA
hsa-miR-7154-5p	0.811567	-1.38885	0.633645	-2.19185	0.0283907	NA
hsa-miR-224-3p	0.318524	0.0864579	0.495589	0.174455	0.861508	NA
hsa-miR-345-3p	10.6582	0.138063	0.40979	0.336912	0.736183	NA
hsa-miR-6768-3p	1.5629	-0.44783	0.646773	-0.692407	0.488682	NA
hsa-miR-4514	0.906879	-0.516183	0.645113	-0.800143	0.423628	NA
hsa-miR-6499-5p	27.5399	-0.72085	0.456128	-1.58037	0.114022	NA
hsa-miR-6749-3p	22.8876	-0.369751	0.418257	-0.884029	0.376681	NA
hsa-miR-4797-5p	4.28474	-0.113736	0.522963	-0.217484	0.827831	NA
hsa-miR-6814-3p	8.94229	-0.11925	0.544799	-0.218888	0.826737	NA
hsa-miR-4728-3p	15.658	0.187893	0.474092	0.396322	0.691867	NA
hsa-miR-3127-5p	7.2286	-0.339018	0.461433	-0.734707	0.462518	NA
hsa-miR-4793-5p	5.64098	-1.02137	0.557799	-1.83107	0.0670906	NA
hsa-miR-1323	0.329727	-0.25539	0.544138	-0.469348	0.638821	NA
hsa-miR-3690	3.11192	-0.406444	0.607428	-0.669123	0.503417	NA
hsa-miR-122-3p	1.8163	1.3678	0.647158	2.11354	0.0345543	NA
hsa-miR-7159-3p	0.51418	-0.311202	0.54768	-0.568219	0.569887	NA
hsa-miR-5001-5p	5.97415	0.209919	0.485337	0.432523	0.665361	NA
hsa-miR-1265	5.19054	-0.675885	0.592997	-1.13978	0.254379	NA
hsa-miR-300	1.68147	0.178088	0.644551	0.276297	0.78232	NA
hsa-miR-6757-5p	3.75875	-1.31454	0.640505	-2.05235	0.0401355	NA
hsa-miR-4802-5p	8.13361	-0.666595	0.579322	-1.15065	0.249878	NA
hsa-miR-6882-5p	8.75523	-0.00651798	0.45765	-0.0142423	0.988637	NA
hsa-miR-876-3p	11.7579	0.207769	0.44463	0.467286	0.640295	NA
hsa-miR-590-5p	14.2111	0.565958	0.428439	1.32098	0.18651	NA
hsa-miR-5009-5p	5.09203	-1.31705	0.539115	-2.44298	0.0145666	NA
hsa-miR-6727-3p	25.4719	-0.441088	0.370997	-1.18893	0.234468	NA
hsa-miR-511-3p	1.2266	-1.16517	0.651075	-1.78962	0.0735155	NA
hsa-miR-6739-5p	4.40545	-0.841615	0.536166	-1.56969	0.116487	NA
hsa-miR-557	15.6849	-0.0304399	0.620811	-0.0490325	0.960893	NA
hsa-miR-4677-5p	5.38653	-1.1737	0.567713	-2.06741	0.0386952	NA
hsa-miR-6754-5p	4.66203	-0.153176	0.612336	-0.250151	0.802471	NA
hsa-miR-8084	20.1212	-0.551759	0.61054	-0.903724	0.366142	NA
hsa-miR-6769b-5p	7.28428	-0.91739	0.635003	-1.4447	0.148541	NA
hsa-miR-4704-5p	1.34374	0.106438	0.647508	0.164381	0.869431	NA
hsa-miR-6074	4.50469	-0.507071	0.6099	-0.831401	0.405747	NA
hsa-miR-4499	1.02608	-1.60035	0.644357	-2.48365	0.0130044	NA
hsa-miR-4426	1.85554	-1.5679	0.64872	-2.41691	0.0156528	NA
hsa-miR-662	0.349858	0.168599	0.557954	0.302175	0.762519	NA
hsa-miR-4254	16.715	-0.0423031	0.373168	-0.113362	0.909744	NA
hsa-miR-524-3p	14.0325	-0.85252	0.480716	-1.77344	0.0761563	NA
hsa-miR-200c-5p	0.170151	0.431439	0.450461	0.957774	0.338177	NA
hsa-miR-147a	0.924281	-0.429789	0.650247	-0.660964	0.508635	NA
hsa-miR-4733-5p	5.18965	-0.0146899	0.520204	-0.0282388	0.977472	NA
hsa-miR-4485-3p	11178.7	-1.60227	0.626809	-2.55623	NA	NA
hsa-miR-4261	2.78322	-0.354463	0.623887	-0.568152	0.569932	NA
hsa-miR-4270	3.82191	-0.0135968	0.571583	-0.0237879	0.981022	NA
hsa-miR-6809-3p	5.16111	-1.03872	0.631134	-1.64579	0.0998069	NA
hsa-miR-1302	8.18837	0.296207	0.450537	0.657452	0.51089	NA
hsa-miR-7112-5p	9.00609	-0.367433	0.433776	-0.847059	0.396962	NA
hsa-miR-20b-3p	28.6887	0.980957	0.569245	1.72326	0.0848413	NA
hsa-miR-4736	0.773829	-0.627032	0.599562	-1.04582	0.295646	NA
hsa-miR-450a-1-3p	0.729566	-0.471489	0.622161	-0.757825	0.448556	NA
hsa-miR-4538	4.53726	-0.627617	0.587275	-1.06869	0.285208	NA
hsa-miR-5093	0.85	0.127877	0.648223	0.197272	0.843614	NA
hsa-miR-3934-5p	27.1351	-0.343123	0.399424	-0.859046	0.390315	NA
hsa-miR-376b-3p	29.1183	-0.03786	0.609763	-0.0620897	NA	NA
hsa-miR-7705	15.692	0.599007	0.477125	1.25545	0.209315	NA
hsa-miR-302d-3p	15.3226	2.7148	0.616465	4.40383	1.06358e-05	NA
hsa-miR-4999-5p	4.83052	-0.538582	0.523595	-1.02862	0.303656	NA
hsa-miR-5589-5p	0.312124	-0.621395	0.512427	-1.21265	0.225263	NA
hsa-miR-4649-3p	5.48291	-0.590553	0.547512	-1.07861	0.28076	NA
hsa-miR-3160-5p	3.88976	-0.0683678	0.588094	-0.116253	0.907452	NA
hsa-miR-4420	88.4984	0.525301	0.587251	0.894508	NA	NA
hsa-miR-3622a-3p	0.522524	-0.664058	0.622706	-1.06641	0.28624	NA
hsa-miR-5195-3p	3.71007	-0.874512	0.60632	-1.44233	0.14921	NA
hsa-miR-215-3p	1.83545	-0.527649	0.639082	-0.825636	0.409011	NA
hsa-miR-4690-3p	15.9963	0.432243	0.445068	0.971184	0.331457	NA
hsa-miR-6847-5p	8.6248	-0.419352	0.503559	-0.832775	0.404972	NA
hsa-miR-7975	116.023	-1.56471	0.635296	-2.46297	NA	NA
hsa-miR-134-5p	306.03	-0.21436	0.651927	-0.32881	NA	NA
hsa-miR-3685	7.49018	-0.260779	0.485246	-0.537416	0.59098	NA
hsa-miR-6786-3p	12.6165	-0.00658857	0.423008	-0.0155755	0.987573	NA
hsa-miR-3166	1.84422	-0.00674626	0.636549	-0.0105982	0.991544	NA
hsa-miR-3667-5p	0.661596	-1.30492	0.623518	-2.09283	0.036364	NA
hsa-miR-539-3p	260.168	-0.223499	0.6431	-0.347534	NA	NA
hsa-miR-432-5p	147.428	-0.168159	0.59218	-0.283966	NA	NA
hsa-miR-487b-3p	653.881	-0.288792	0.651178	-0.443492	NA	NA
hsa-miR-8056	1.51495	-1.15129	0.651406	-1.7674	0.0771617	NA
hsa-miR-5186	4.87722	-1.58213	0.567815	-2.78635	0.00533046	NA
hsa-miR-4506	4.24861	-0.440166	0.607968	-0.723995	0.469069	NA
hsa-miR-5189-3p	9.25408	0.0673068	0.50685	0.132794	0.894356	NA
hsa-miR-105-3p	22.2511	-0.469175	0.476386	-0.984863	0.324691	NA
hsa-miR-1257	2.12074	-0.0524776	0.614635	-0.08538	0.931959	NA
hsa-miR-4671-5p	3.79095	-0.133066	0.596984	-0.222897	0.823616	NA
hsa-miR-4535	5.64202	-1.11007	0.548621	-2.02339	0.0430331	NA
hsa-miR-624-5p	16.1146	0.159888	0.375552	0.425741	0.670296	NA
hsa-miR-6853-5p	0.755731	-0.0156495	0.645417	-0.0242471	0.980656	NA
hsa-miR-548q	26.0211	-0.542548	0.412011	-1.31683	0.187896	NA
hsa-miR-4496	6.20562	-0.762781	0.614894	-1.24051	0.214787	NA
hsa-miR-8079	16.0668	-1.57668	0.610819	-2.58126	0.00984414	NA
hsa-miR-4278	3.89386	-0.698729	0.608589	-1.14811	0.250922	NA
hsa-miR-4529-5p	3.90926	-1.14846	0.56775	-2.02283	0.0430902	NA
hsa-miR-5705	20.2707	-0.0731739	0.411991	-0.177611	0.859029	NA
hsa-miR-4322	1.44393	-0.491359	0.645929	-0.760702	0.446835	NA
hsa-miR-95-5p	28.4737	-0.319189	0.31849	-1.00219	0.31625	NA
hsa-miR-4287	0.352406	0.452467	0.556304	0.813344	0.416021	NA
hsa-miR-299-3p	121.009	-0.0358315	0.649998	-0.0551256	NA	NA
hsa-miR-4759	2.54554	-0.359089	0.59525	-0.603258	0.546337	NA
hsa-miR-6836-5p	6.72626	-0.581391	0.480295	-1.21049	0.226091	NA
hsa-miR-521	3.01318	-0.111369	0.589013	-0.189077	0.850032	NA
hsa-miR-4493	2.67232	-0.640976	0.599181	-1.06975	0.28473	NA
hsa-miR-1273d	17.8339	-1.14983	0.434033	-2.64919	0.00806857	NA
hsa-miR-513b-3p	1.22712	0.0165858	0.648928	0.0255587	0.979609	NA
hsa-miR-4713-3p	2.92031	-0.0296255	0.583745	-0.0507508	0.959524	NA
hsa-miR-4674	4.26867	-1.05318	0.548027	-1.92177	0.0546344	NA
hsa-miR-3646	1.83434	-0.797751	0.65027	-1.2268	0.219898	NA
hsa-miR-1282	6.62664	-0.932577	0.549689	-1.69655	0.0897811	NA
hsa-miR-133b	0	NA	NA	NA	NA	NA
hsa-miR-3193	1.8125	-0.102298	0.620645	-0.164826	0.869081	NA
hsa-miR-1288-3p	3.73337	-0.908059	0.606656	-1.49683	0.134438	NA
hsa-miR-4680-5p	1.4156	-0.497949	0.65108	-0.764805	0.444388	NA
hsa-miR-6084	6.85883	0.813365	0.495679	1.64091	0.100815	NA
hsa-miR-6745	3.73255	-1.01834	0.593555	-1.71567	0.0862231	NA
hsa-miR-6733-5p	11.7555	-0.177027	0.459293	-0.385434	0.699916	NA
hsa-miR-548c-3p	15.8813	0.0401859	0.502637	0.0799503	0.936277	NA
hsa-miR-4641	5.86739	-0.662533	0.558834	-1.18556	0.235795	NA
hsa-miR-3654	10.5008	-1.60529	0.56042	-2.86445	0.00417734	NA
hsa-miR-6889-3p	12.3438	-0.59084	0.449906	-1.31325	0.189098	NA
hsa-miR-433-5p	19.2227	-0.641494	0.649238	-0.988073	0.323117	NA
hsa-miR-8089	5.1906	-0.862257	0.508068	-1.69713	0.089672	NA
hsa-miR-6792-5p	1.7116	-0.183465	0.629181	-0.291593	0.770598	NA
hsa-miR-4662a-3p	1.11215	-0.185855	0.648678	-0.286514	0.774484	NA
hsa-miR-298	0.514949	0.209209	0.624797	0.334844	0.737743	NA
hsa-miR-6806-3p	7.61709	0.295479	0.500917	0.589875	0.555274	NA
hsa-miR-4748	1.16646	-0.780976	0.649555	-1.20233	0.229237	NA
hsa-miR-541-5p	13.7915	-0.0785764	0.651806	-0.120552	0.904046	NA
hsa-miR-6884-3p	4.88727	-0.800882	0.577247	-1.38742	0.165315	NA
hsa-miR-3680-5p	5.51949	-0.803839	0.557609	-1.44158	0.14942	NA
hsa-miR-154-5p	22.7627	-0.0604248	0.651351	-0.0927684	NA	NA
hsa-miR-758-3p	451.857	0.14043	0.649838	0.2161	NA	NA
hsa-miR-3655	17.6735	-0.0284374	0.409462	-0.0694508	0.944631	NA
hsa-miR-6857-3p	8.44036	0.241698	0.50543	0.478203	0.632506	NA
hsa-miR-4637	1.05318	-1.08674	0.645132	-1.68452	0.0920806	NA
hsa-miR-4435	8.14731	0.701552	0.479094	1.46433	0.143104	NA
hsa-miR-6817-5p	9.21554	1.14671	0.651187	1.76096	NA	NA
hsa-miR-122-5p	3.15565	0.816164	0.586405	1.39181	0.16398	NA
hsa-miR-205-3p	1.38271	-1.03488	0.64741	-1.59849	0.109933	NA
hsa-miR-568	1.63707	-0.428221	0.647737	-0.661103	0.508546	NA
hsa-miR-4503	6.39897	-0.626702	0.547456	-1.14475	0.252312	NA
hsa-miR-5088-3p	4.09872	-0.628251	0.586031	-1.07204	0.283701	NA
hsa-miR-664a-5p	24.6004	0.13723	0.37237	0.36853	0.712478	NA
hsa-miR-424-5p	163.106	0.313	0.472388	0.66259	NA	NA
hsa-miR-4741	23.5768	0.462604	0.365103	1.26705	0.205137	NA
hsa-miR-3976	0.320529	-0.225025	0.552696	-0.40714	0.683905	NA
hsa-miR-451b	1.89856	-0.875999	0.648271	-1.35129	0.176604	NA
hsa-miR-4517	7.22796	-0.32739	0.56214	-0.582399	0.560298	NA
hsa-miR-508-3p	2.55984	-0.903614	0.612159	-1.47611	0.139915	NA
hsa-miR-3942-5p	9.30663	-0.182891	0.434318	-0.421099	0.673683	NA
hsa-miR-6766-3p	0.94549	-1.17395	0.646166	-1.81679	0.0692486	NA
hsa-miR-3974	1.13113	-0.790538	0.623311	-1.26829	0.204695	NA
hsa-miR-1250-3p	4.22052	-1.40887	0.601739	-2.34134	0.0192149	NA
hsa-miR-6511b-5p	17.0182	-0.172504	0.37504	-0.459963	0.645543	NA
hsa-let-7b-3p	0.492994	0.900989	0.565659	1.59281	0.111202	NA
hsa-miR-3918	5.77983	-0.248437	0.57321	-0.433414	0.664714	NA
hsa-miR-185-3p	0.0660678	-0.210799	0.384096	-0.548819	0.58313	NA
hsa-miR-7153-3p	1.99125	-0.423992	0.617077	-0.687097	0.492022	NA
hsa-miR-378e	4.74559	-0.0197381	0.569741	-0.0346439	0.972364	NA
hsa-miR-6867-5p	1.1381	-0.0475915	0.649192	-0.0733089	0.94156	NA
hsa-miR-34b-3p	15.7011	1.31367	0.519244	2.52997	0.0114074	NA
hsa-miR-6855-5p	1.81794	-0.175489	0.648697	-0.270526	0.786756	NA
hsa-miR-4697-3p	0.863253	-0.330331	0.638992	-0.516957	0.605186	NA
hsa-miR-1202	1.91577	-0.208717	0.638457	-0.326908	0.743737	NA
hsa-miR-3713	7.07819	-0.772797	0.517543	-1.4932	0.135384	NA
hsa-miR-3915	1.60307	-0.922339	0.646813	-1.42598	0.153875	NA
hsa-miR-3127-3p	9.62916	-0.336297	0.479003	-0.702076	0.482632	NA
hsa-miR-320b	9.94145	-0.349039	0.51434	-0.678615	0.497382	NA
hsa-miR-15a-3p	2.35055	-0.15417	0.636072	-0.242379	0.808487	NA
hsa-miR-4446-5p	1.7747	0.0813741	0.650811	0.125035	0.900496	NA
hsa-miR-559	0.758758	-0.706783	0.599864	-1.17824	0.238701	NA
hsa-miR-4482-5p	3.00246	0.519392	0.615282	0.844154	0.398584	NA
hsa-miR-520f-5p	0.190878	-0.0508959	0.456799	-0.111419	0.911284	NA
hsa-miR-3614-5p	5.38039	-0.159712	0.544424	-0.29336	0.769247	NA
hsa-miR-6874-3p	3.23454	-0.791779	0.638281	-1.24049	0.214796	NA
hsa-miR-6779-5p	3.4844	-0.4778	0.633954	-0.753683	0.45104	NA
hsa-miR-548ax	3.3624	0.295869	0.617175	0.479392	0.63166	NA
hsa-miR-5682	4.41931	-0.204609	0.605178	-0.338096	0.735291	NA
hsa-miR-615-5p	16.0518	0.795457	0.453531	1.75392	0.0794442	NA
hsa-miR-507	1.36599	-0.209992	0.650594	-0.32277	0.74687	NA
hsa-miR-548h-5p	18.2195	1.00554	0.454183	2.21396	0.0268317	NA
hsa-miR-365b-5p	12.8988	0.122464	0.627735	0.195089	0.845323	NA
hsa-miR-4708-5p	4.06186	0.414887	0.650872	0.637432	0.523843	NA
hsa-miR-6762-5p	5.80874	-0.474359	0.534155	-0.888054	0.374512	NA
hsa-miR-6752-3p	2.88278	0.489799	0.59035	0.829676	0.406722	NA
hsa-miR-337-5p	24.3263	0.62594	0.532416	1.17566	0.239732	NA
hsa-miR-506-3p	7.61604	0.159005	0.477137	0.333249	0.738946	NA
hsa-miR-4711-3p	2.18258	-0.871007	0.644313	-1.35184	0.176427	NA
hsa-miR-4659b-3p	1.62652	-0.260604	0.640446	-0.406911	0.684074	NA
hsa-miR-4655-5p	2.81633	-0.914606	0.596572	-1.5331	0.125251	NA
hsa-miR-631	4.23025	-0.636127	0.59783	-1.06406	0.287301	NA
hsa-miR-4267	28.3551	-0.0554726	0.361544	-0.153433	0.878057	NA
hsa-miR-5010-5p	5.9541	0.224708	0.517025	0.434616	0.663841	NA
hsa-miR-7976	27.9025	0.090367	0.425492	0.212382	0.831809	NA
hsa-miR-6506-5p	1.55218	-0.931543	0.647428	-1.43884	0.150197	NA
hsa-miR-7158-5p	4.96016	0.0591162	0.530468	0.111442	0.911266	NA
hsa-miR-5591-5p	0.555669	-0.383929	0.551663	-0.695949	0.486461	NA
hsa-miR-3191-3p	2.79051	-1.15002	0.623756	-1.84371	0.0652261	NA
hsa-miR-6762-3p	6.01383	-0.00799467	0.494211	-0.0161766	0.987093	NA
hsa-miR-6131	274433	-0.836193	0.514579	-1.625	NA	NA
hsa-miR-8059	0.741888	-0.10887	0.619783	-0.175658	0.860563	NA
hsa-miR-4768-3p	4.31073	-0.759449	0.596973	-1.27217	0.203314	NA
hsa-miR-8052	0.0660678	-0.210799	0.384096	-0.548819	0.58313	NA
hsa-miR-4305	0.607064	-0.185612	0.595675	-0.311599	0.755345	NA
hsa-miR-4697-5p	2.14871	-0.570095	0.627309	-0.908794	0.363459	NA
hsa-miR-7153-5p	4.82276	0.19329	0.575531	0.335846	0.736987	NA
hsa-miR-3189-5p	1.21341	-0.666215	0.649876	-1.02514	0.305296	NA
hsa-miR-6743-3p	5.2568	-0.893089	0.508216	-1.7573	0.0788662	NA
hsa-miR-373-3p	0.620905	0.0484133	0.616899	0.0784785	0.937447	NA
hsa-miR-585-3p	21.6098	-0.187843	0.627813	-0.299202	0.764786	NA
hsa-miR-6848-3p	11.528	-0.665638	0.463765	-1.43529	0.151204	NA
hsa-miR-2355-5p	217.343	1.51016	0.574378	2.62921	NA	NA
hsa-miR-4427	0.246436	-0.546328	0.488607	-1.11813	0.26351	NA
hsa-miR-6070	25.7251	-0.513438	0.498714	-1.02952	0.303233	NA
hsa-miR-4760-5p	4.43649	-0.850315	0.56198	-1.51307	0.130262	NA
hsa-miR-652-5p	23.5787	0.213995	0.454814	0.470512	0.63799	NA
hsa-miR-3677-5p	1.94174	-0.667592	0.615982	-1.08379	0.27846	NA
hsa-miR-4709-3p	1.16195	-0.768553	0.649823	-1.18271	0.236923	NA
hsa-miR-655-3p	22.9574	-0.110018	0.579278	-0.189923	NA	NA
hsa-miR-7702	1.20264	-0.306551	0.649866	-0.471714	0.637131	NA
hsa-miR-6823-5p	2.44989	-1.38717	0.638621	-2.17214	0.0298454	NA
hsa-miR-1245b-3p	21.9541	0.776252	0.567003	1.36904	NA	NA
hsa-miR-16-1-3p	10.7902	-0.115733	0.491406	-0.235514	0.81381	NA
hsa-miR-1203	18.122	0.964201	0.4327	2.22833	0.0258583	NA
hsa-miR-762	16.3717	-0.132603	0.417141	-0.317885	0.750572	NA
hsa-miR-1295a	27.2523	0.692018	0.468518	1.47703	0.139667	NA
hsa-miR-205-5p	1.7635	-0.232578	0.639253	-0.363827	0.715987	NA
hsa-miR-6887-5p	9.01837	-1.24484	0.470262	-2.64713	0.00811777	NA
hsa-miR-7160-3p	10.2657	-0.621449	0.490355	-1.26735	0.205031	NA
hsa-miR-4633-3p	4.90403	0.519936	0.546765	0.950932	0.341639	NA
hsa-miR-4463	22.4264	-0.576126	0.595868	-0.966869	0.33361	NA
hsa-miR-3180-5p	16.7364	0.543741	0.420765	1.29227	0.196265	NA
hsa-miR-5004-5p	10.792	-0.339497	0.466307	-0.728056	0.466579	NA
hsa-miR-6843-3p	1.59953	-0.566504	0.643324	-0.880589	0.37854	NA
hsa-miR-623	0	NA	NA	NA	NA	NA
hsa-miR-6830-5p	15.0831	0.177168	0.634733	0.279122	0.780151	NA
hsa-miR-4725-5p	1.08841	-0.7201	0.65014	-1.10761	0.268031	NA
hsa-miR-4744	1.28705	-0.623394	0.651055	-0.957514	0.338308	NA
hsa-miR-1253	1.21768	-0.669364	0.649753	-1.03018	0.302925	NA
hsa-miR-515-5p	7.46156	-0.473016	0.50761	-0.931851	0.351414	NA
hsa-miR-4453	1.5119	-1.6833	0.651914	-2.58208	0.00982061	NA
hsa-miR-302e	0.330689	0.382472	0.551137	0.693969	0.487702	NA
hsa-miR-4256	1.75697	-0.22087	0.618719	-0.356979	0.721107	NA
hsa-miR-7848-3p	19.7168	-0.0315195	0.419137	-0.075201	0.940055	NA
hsa-miR-4731-5p	15.012	-0.8354	0.436212	-1.91513	0.0554765	NA
hsa-miR-676-3p	18.1281	-0.143989	0.404154	-0.356272	0.721637	NA
hsa-miR-7150	2.70348	-0.370427	0.613312	-0.603979	0.545858	NA
hsa-miR-6786-5p	12.7074	-0.0443117	0.505242	-0.087704	0.930112	NA
hsa-miR-920	2.67013	-0.716286	0.634922	-1.12815	0.259257	NA
hsa-miR-1264	14.6202	-0.136694	0.634178	-0.215545	0.829343	NA
hsa-miR-6500-3p	0.315514	-0.281661	0.546373	-0.515511	0.606196	NA
hsa-miR-4653-3p	1.57735	0.576673	0.637348	0.904802	0.36557	NA
hsa-miR-1273h-3p	23.2229	-1.1326	0.515673	-2.19636	0.0280662	NA
hsa-miR-6780a-3p	19.9978	-0.743909	0.493012	-1.5089	0.131323	NA
hsa-miR-4790-3p	0.312504	-0.638014	0.515136	-1.23854	0.215518	NA
hsa-miR-513c-5p	0.689419	-0.0621054	0.622256	-0.0998069	0.920498	NA
hsa-miR-6878-5p	1.45749	-1.79958	0.64936	-2.77131	0.00558319	NA
hsa-miR-6759-5p	0.692933	0.142045	0.642757	0.220993	0.825098	NA
hsa-miR-4536-5p	0.766156	-1.15642	0.603771	-1.91533	0.0554501	NA
hsa-miR-130a-5p	1.21453	-0.0528893	0.650448	-0.0813121	0.935194	NA
hsa-miR-6512-5p	2.86354	-0.319151	0.602887	-0.52937	0.596549	NA
hsa-miR-4258	22.2761	0.199324	0.44717	0.445747	0.65578	NA
hsa-miR-562	3.63661	-0.752042	0.599445	-1.25456	0.209637	NA
hsa-miR-133a-5p	0.766139	-0.00234997	0.64451	-0.00364614	0.997091	NA
hsa-miR-3156-3p	5.26646	-0.745094	0.545541	-1.36579	0.172006	NA
hsa-miR-1231	2.64386	-0.511071	0.606863	-0.842153	0.399702	NA
hsa-miR-548as-3p	17.5689	-0.788441	0.499383	-1.57883	0.114375	NA
hsa-miR-4692	2.0725	-0.0906707	0.641233	-0.141401	0.887554	NA
hsa-miR-504-3p	8.56573	0.211207	0.54175	0.389861	0.696639	NA
hsa-miR-10a-3p	6.05464	0.266297	0.628043	0.424011	0.671558	NA
hsa-miR-4468	3.25887	-1.33542	0.588232	-2.27023	0.0231934	NA
hsa-miR-3165	2.28657	-0.791278	0.643507	-1.22963	0.218835	NA
hsa-miR-3606-3p	2.39755	-1.09537	0.641905	-1.70643	0.0879284	NA
hsa-miR-4719	0.638324	0.196557	0.612879	0.320711	0.748429	NA
hsa-miR-384	10.9045	-0.782656	0.597786	-1.30926	0.190447	NA
hsa-miR-323b-3p	628.19	0.0186192	0.650629	0.0286172	NA	NA
hsa-miR-4526	2.46738	0.149415	0.625658	0.238812	0.811251	NA
hsa-miR-877-3p	18.0535	0.14512	0.437469	0.331727	0.740096	NA
hsa-miR-3159	22.8812	-1.11443	0.39611	-2.81344	0.00490142	NA
hsa-miR-4274	4.46922	-1.0734	0.552432	-1.94305	0.0520098	NA
hsa-miR-548g-5p	3.75094	-0.668583	0.55	-1.2156	0.224136	NA
hsa-miR-635	2.85162	-0.689404	0.604638	-1.14019	0.254206	NA
hsa-miR-5197-5p	8.19498	-1.46938	0.527094	-2.7877	0.00530842	NA
hsa-miR-6730-5p	1.81069	-0.0592112	0.628643	-0.0941889	0.924959	NA
hsa-miR-4761-3p	3.56763	-1.00021	0.623389	-1.60446	0.108612	NA
hsa-miR-6800-3p	1.74849	0.286933	0.630129	0.455356	0.648853	NA
hsa-miR-4687-3p	11.6737	-0.0669146	0.514828	-0.129975	0.896586	NA
hsa-miR-579-3p	2.90888	-0.238644	0.601573	-0.3967	0.691589	NA
hsa-miR-3145-3p	27.1925	-0.108732	0.473534	-0.229619	0.818388	NA
hsa-miR-593-3p	1.11924	-1.11264	0.645909	-1.7226	0.0849608	NA
hsa-miR-374c-5p	3.38941	-0.229671	0.587123	-0.39118	0.695664	NA
hsa-miR-3064-3p	2.63153	0.18208	0.632333	0.287949	0.773386	NA
hsa-miR-4733-3p	5.39215	-0.328294	0.520357	-0.630901	0.528105	NA
hsa-miR-1250-5p	12.2498	-0.457702	0.442733	-1.03381	0.301225	NA
hsa-miR-632	1.58612	-0.37035	0.645762	-0.573508	0.566301	NA
hsa-miR-142-3p	0.753755	-0.612169	0.64378	-0.950897	0.341657	NA
hsa-miR-302b-5p	1.28284	0.0885798	0.64933	0.136417	0.891491	NA
hsa-miR-3200-5p	12.1007	0.0746162	0.40589	0.183833	0.854144	NA
hsa-miR-490-5p	8.12569	-0.181962	0.544719	-0.334048	0.738343	NA
hsa-miR-3689d	0.467603	0.234917	0.616465	0.381071	0.703151	NA
hsa-miR-4657	1.97818	-0.670009	0.624538	-1.07281	0.283357	NA
hsa-miR-936	13.5818	-0.199127	0.502428	-0.39633	0.691861	NA
hsa-miR-570-5p	2.02802	-0.708293	0.625092	-1.1331	0.257172	NA
hsa-miR-302a-5p	4.47836	1.65039	0.628573	2.62561	0.00864929	NA
hsa-miR-138-1-3p	0	NA	NA	NA	NA	NA
hsa-miR-381-5p	3.05172	-0.495655	0.643904	-0.769765	0.441439	NA
hsa-miR-1322	12.8388	0.24437	0.48733	0.501448	0.616056	NA
hsa-miR-128-2-5p	7.04617	-0.0569292	0.600013	-0.09488	0.92441	NA
hsa-miR-6783-5p	7.61315	-0.324597	0.478319	-0.67862	0.497378	NA
hsa-miR-8063	6.68044	0.738255	0.645891	1.143	NA	NA
hsa-miR-4699-3p	1.00257	-0.157555	0.648705	-0.242877	0.808101	NA
hsa-miR-6882-3p	4.74612	-0.955735	0.551951	-1.73156	0.0833526	NA
hsa-miR-487b-5p	5.13881	-0.170104	0.641141	-0.265314	0.790767	NA
hsa-miR-548s	6.12762	-0.436049	0.541341	-0.805499	0.420532	NA
hsa-miR-3689a-3p	0.447082	-0.961237	0.58282	-1.64929	0.0990891	NA
hsa-miR-2053	1.79402	-0.555562	0.648169	-0.857126	0.391375	NA
hsa-miR-449c-5p	2.9777	-0.535075	0.612253	-0.873945	0.382148	NA
hsa-miR-3940-5p	2.09536	0.376314	0.616695	0.610211	0.541722	NA
hsa-miR-7853-5p	1.77359	-0.896214	0.650883	-1.37692	0.168537	NA
hsa-miR-3692-5p	3.08481	-1.19497	0.624216	-1.91435	0.0555755	NA
hsa-miR-7162-5p	3.97929	-0.398669	0.542351	-0.735076	0.462293	NA
hsa-miR-3688-3p	7.55736	-0.462597	0.4929	-0.938523	0.347976	NA
hsa-miR-4509	1.30648	-1.43285	0.650365	-2.20315	0.027584	NA
hsa-miR-4318	3.14683	-0.786125	0.601156	-1.30769	0.190979	NA
hsa-miR-548ae-3p	2.25048	-0.171913	0.613592	-0.280174	0.779344	NA
hsa-miR-1185-2-3p	9.79403	-0.0344042	0.560774	-0.0613512	0.95108	NA
hsa-miR-4640-5p	7.8587	-0.294461	0.491492	-0.599116	0.549096	NA
hsa-miR-4670-3p	14.1942	-0.0358419	0.65168	-0.0549992	NA	NA
hsa-miR-383-5p	23.0381	0.613942	0.4892	1.25499	0.209481	NA
hsa-miR-1183	1.10131	0.140649	0.648349	0.216934	0.82826	NA
hsa-miR-6816-3p	3.56419	-0.756545	0.544065	-1.39054	0.164365	NA
hsa-miR-548g-3p	0.356764	-0.285289	0.553703	-0.515239	0.606386	NA
hsa-miR-1287-3p	6.32996	-0.392597	0.564633	-0.695313	0.486859	NA
hsa-miR-585-5p	5.51016	-0.362348	0.596255	-0.607706	0.543383	NA
hsa-miR-548v	4.95341	-0.178047	0.578504	-0.307772	0.758256	NA
hsa-miR-503-5p	9.74129	0.400074	0.603776	0.66262	0.507574	NA
hsa-miR-4330	1.53474	-0.778209	0.651206	-1.19503	0.232077	NA
hsa-miR-502-5p	25.4116	0.40845	0.43899	0.930432	0.352148	NA
hsa-miR-3120-3p	4.62246	0.702566	0.610005	1.15174	0.249428	NA
hsa-miR-518b	0.334282	-0.0367664	0.519683	-0.0707478	0.943598	NA
hsa-miR-485-5p	237.043	0.0190138	0.651698	0.0291759	NA	NA
hsa-miR-554	3.81489	-0.505633	0.562905	-0.898257	0.369049	NA
hsa-miR-144-5p	25.1813	-0.0693736	0.365177	-0.189973	0.84933	NA
hsa-miR-3922-3p	3.27838	-1.41069	0.637186	-2.21394	0.0268329	NA
hsa-miR-3150a-3p	1.19209	-0.0533533	0.647007	-0.0824617	0.93428	NA
hsa-miR-3191-5p	8.78284	-0.249256	0.537679	-0.463577	0.642951	NA
hsa-miR-6088	5.2936	-0.0958243	0.569622	-0.168224	0.866407	NA
hsa-miR-2355-3p	17.044	0.861555	0.457407	1.88356	0.059624	NA
hsa-miR-939-5p	7.55963	-0.809171	0.478494	-1.69108	0.0908214	NA
hsa-miR-541-3p	11.6417	-0.134286	0.650815	-0.206335	NA	NA
hsa-miR-4795-3p	0.235545	0.382135	0.426791	0.895367	0.370591	NA
hsa-miR-4752	1.3238	-0.590781	0.650514	-0.908176	0.363785	NA
hsa-miR-4680-3p	1.30906	-0.729405	0.65091	-1.12059	0.262461	NA
hsa-miR-4783-3p	7.94087	-0.0808997	0.47055	-0.171926	0.863496	NA
hsa-miR-1262	13.8847	0.36818	0.424746	0.866824	0.386038	NA
hsa-miR-591	3.12817	-1.10762	0.621966	-1.78084	0.0749389	NA
hsa-miR-3591-5p	2.04663	-0.936178	0.650396	-1.4394	0.150038	NA
hsa-miR-4650-3p	0.95455	-0.28179	0.64251	-0.438577	0.660968	NA
hsa-miR-889-3p	1047.71	-0.184187	0.650498	-0.283147	NA	NA
hsa-miR-6747-5p	3.12042	-0.733445	0.642827	-1.14097	0.253883	NA
hsa-miR-4524b-3p	3.51632	-0.413541	0.589467	-0.701551	0.482959	NA
hsa-miR-4687-5p	18.5456	0.378576	0.389936	0.970866	0.331615	NA
hsa-miR-1207-5p	2.01835	-0.859262	0.650203	-1.32153	0.186325	NA
hsa-miR-659-3p	3.48105	0.100346	0.573054	0.175108	0.860995	NA
hsa-miR-942-5p	15.0417	-0.0822894	0.603635	-0.136323	0.891566	NA
hsa-miR-802	20.0471	-0.687586	0.522902	-1.31494	0.18853	NA
hsa-miR-526a	0.117773	0.27336	0.388595	0.703456	0.481771	NA
hsa-miR-4776-3p	2.67883	-1.39645	0.616089	-2.26664	0.0234122	NA
hsa-miR-4255	1.24641	-0.863906	0.638117	-1.35384	0.175789	NA
hsa-miR-5690	27.2087	-0.431001	0.424472	-1.01538	0.309924	NA
hsa-miR-3198	6.99863	0.16628	0.610012	0.272584	0.785173	NA
hsa-miR-5687	0.090184	-0.254877	0.385376	-0.661372	0.508374	NA
hsa-miR-4758-5p	1.37062	0.0607384	0.647254	0.0938401	0.925236	NA
hsa-miR-6776-3p	9.14705	-1.02961	0.526082	-1.95712	0.0503328	NA
hsa-miR-6732-3p	3.03813	-0.590175	0.578459	-1.02025	0.307608	NA
hsa-miR-8074	4.06065	-0.2575	0.552003	-0.466482	0.640871	NA
hsa-miR-3675-3p	4.4096	-0.953823	0.555407	-1.71734	0.0859168	NA
hsa-miR-5586-5p	1.20605	-0.145625	0.645642	-0.22555	0.821551	NA
hsa-miR-3610	11.4627	-0.429339	0.566893	-0.757355	0.448837	NA
hsa-miR-223-5p	0.797046	-0.275862	0.62407	-0.442037	0.658462	NA
hsa-miR-206	0.0660678	-0.210799	0.384096	-0.548819	0.58313	NA
hsa-miR-1468-3p	2.07017	-1.18115	0.647894	-1.82306	0.0682939	NA
hsa-miR-668-5p	9.86444	0.442785	0.449878	0.984233	0.325001	NA
hsa-miR-5004-3p	14.4107	-0.553472	0.394849	-1.40173	0.160996	NA
hsa-miR-411-5p	7948.7	-0.0469669	0.632149	-0.0742971	NA	NA
hsa-miR-4712-5p	2.5061	-0.828617	0.627618	-1.32026	0.186749	NA
hsa-miR-5583-3p	0.907025	0.024426	0.64063	0.0381281	0.969586	NA
hsa-miR-3122	1.78819	-0.651727	0.651054	-1.00103	0.316811	NA
hsa-miR-4263	28.1266	-0.651516	0.649278	-1.00345	NA	NA
hsa-miR-4312	2.36115	-0.768346	0.619278	-1.24071	0.214712	NA
hsa-miR-98-5p	4046.41	1.27789	0.539327	2.36943	NA	NA
hsa-miR-1178-3p	0.62944	-0.222263	0.616089	-0.360765	0.718275	NA
hsa-miR-204-3p	4.20621	-0.597613	0.58817	-1.01605	0.309603	NA
hsa-miR-4471	3.96666	-1.07835	0.585163	-1.84283	0.0653545	NA
hsa-miR-6884-5p	1.65987	-0.123817	0.62787	-0.197201	0.84367	NA
hsa-miR-6851-5p	5.26819	-2.06448	0.586142	-3.52214	0.000428074	NA
hsa-miR-4520-2-3p	13.1486	-0.432104	0.509672	-0.847808	0.396545	NA
hsa-miR-888-5p	16.5489	-0.875822	0.509166	-1.72011	0.0854124	NA
hsa-miR-3129-3p	8.07492	0.874524	0.448069	1.95176	0.0509666	NA
hsa-miR-516b-5p	8.12024	-1.0422	0.465705	-2.2379	0.0252276	NA
hsa-miR-7113-3p	9.44451	0.197482	0.479355	0.411975	0.680357	NA
hsa-miR-3179	3.42032	-0.355267	0.60551	-0.586724	0.557389	NA
hsa-miR-3689b-3p	0.447082	-0.961237	0.58282	-1.64929	0.0990891	NA
hsa-miR-548al	19.4997	0.0260536	0.377464	0.0690228	0.944971	NA
hsa-miR-6795-3p	4.73472	-0.0107427	0.524634	-0.0204765	0.983663	NA
hsa-miR-492	0	NA	NA	NA	NA	NA
hsa-miR-6865-5p	1.15315	0.202905	0.645734	0.314223	0.753351	NA
hsa-miR-6832-5p	7.15951	0.00845704	0.541807	0.0156089	0.987546	NA
hsa-miR-548bb-5p	2.96548	-0.775668	0.61285	-1.26567	0.20563	NA
hsa-miR-4750-3p	36.1829	-0.0320945	0.578296	-0.0554984	NA	NA
hsa-miR-369-5p	202.243	-0.00483391	0.624871	-0.00773585	NA	NA
hsa-miR-4660	0.99324	-0.913225	0.650689	-1.40347	0.160475	NA
hsa-miR-4804-3p	0.993734	-0.431815	0.650229	-0.664097	0.506628	NA
hsa-miR-6757-3p	3.11039	-1.06172	0.630809	-1.68311	0.0923533	NA
hsa-miR-6869-5p	14.1217	-0.180218	0.423315	-0.425731	0.670304	NA
hsa-miR-4755-5p	2.8972	0.741658	0.603579	1.22877	0.219159	NA
hsa-miR-3137	0.843012	-0.810744	0.642335	-1.26218	0.206883	NA
hsa-miR-3652	3.97593	-0.861091	0.559521	-1.53898	0.12381	NA
hsa-miR-8070	2.70096	-1.03734	0.616124	-1.68365	0.0922491	NA
hsa-miR-6764-3p	16.1802	-0.00904936	0.403396	-0.022433	0.982103	NA
hsa-miR-5588-3p	25.1238	-0.476714	0.438893	-1.08617	0.277402	NA
hsa-miR-4766-3p	4.51004	-0.838384	0.590425	-1.41997	0.155617	NA
hsa-miR-1199-5p	27.0451	-0.100637	0.384897	-0.261466	0.793734	NA
hsa-miR-5001-3p	23.7302	-0.335291	0.438863	-0.763999	0.444868	NA
hsa-miR-4740-5p	3.74168	-0.0350676	0.545424	-0.0642941	0.948736	NA
hsa-miR-214-5p	3.13132	1.40572	0.639514	2.19811	0.0279416	NA
hsa-miR-3190-5p	2.29211	-0.75892	0.622404	-1.21934	0.222716	NA
hsa-miR-4664-3p	21.0258	-0.224527	0.554256	-0.405096	0.685407	NA
hsa-miR-6076	1.56915	-0.816076	0.648475	-1.25845	0.208227	NA
hsa-miR-139-3p	6.6001	0.58064	0.569328	1.01987	0.30779	NA
hsa-miR-544a	2.34585	0.0855584	0.487192	0.175615	0.860596	NA
hsa-miR-3691-5p	20.2481	0.252208	0.411815	0.612431	0.540253	NA
hsa-miR-581	4.35229	-0.896096	0.552711	-1.62127	0.104959	NA
hsa-miR-511-5p	2.23947	-0.11822	0.650107	-0.181847	0.855703	NA
hsa-miR-4500	9.32567	0.500979	0.504697	0.992635	0.320888	NA
hsa-miR-4676-3p	3.07183	0.316105	0.582362	0.542798	0.587269	NA
hsa-miR-4296	1.37014	-0.779274	0.649165	-1.20042	0.229974	NA
hsa-miR-3666	1.4226	-0.912953	0.651438	-1.40144	0.161082	NA
hsa-miR-3134	0.992657	-0.140893	0.649258	-0.217006	0.828204	NA
hsa-miR-619-3p	0.547863	-0.478744	0.599799	-0.798175	0.424769	NA
hsa-miR-378j	6.51886	-1.56346	0.611993	-2.5547	0.0106278	NA
hsa-miR-3151-5p	8.27603	-0.779112	0.484996	-1.60643	0.108179	NA
hsa-miR-1-3p	5.44444	0.509714	0.608057	0.838265	0.401882	NA
hsa-miR-6756-3p	20.029	-0.73881	0.48607	-1.51997	0.12852	NA
hsa-miR-7111-3p	5.85488	-0.490389	0.525327	-0.933492	0.350566	NA
hsa-miR-6846-5p	10.7721	-0.82618	0.489488	-1.68785	0.091441	NA
hsa-miR-597-5p	8.04246	0.397377	0.461816	0.860466	0.389532	NA
hsa-miR-8085	1.67398	-0.674225	0.636849	-1.05869	0.289741	NA
hsa-miR-1471	67.2809	-1.18021	0.539816	-2.18632	NA	NA
hsa-miR-548d-5p	11.8805	0.0512573	0.423847	0.120933	0.903744	NA
hsa-miR-1247-3p	13.3445	0.137838	0.537446	0.256469	0.797589	NA
hsa-miR-5187-5p	2.61804	0.172464	0.594956	0.289876	0.771911	NA
hsa-miR-323a-3p	896.316	-0.0819549	0.648853	-0.126307	NA	NA
hsa-miR-4298	3.70519	-0.950689	0.562291	-1.69074	0.0908862	NA
hsa-miR-6739-3p	9.86283	-0.253003	0.431885	-0.585812	0.558002	NA
hsa-miR-1256	4.37198	0.405864	0.548565	0.739865	0.459382	NA
hsa-miR-2054	5.56509	-1.11794	0.604364	-1.84978	0.0643448	NA
hsa-miR-4425	3.47621	0.170548	0.569858	0.299282	0.764725	NA
hsa-miR-7151-5p	3.01563	-0.339133	0.601078	-0.564207	0.572613	NA
hsa-miR-372-5p	0.891516	-0.173634	0.647596	-0.268122	0.788606	NA
hsa-miR-367-5p	0.441178	-0.0818333	0.577811	-0.141627	0.887375	NA
hsa-miR-7515	0.351401	-0.381426	0.581615	-0.655806	0.511949	NA
hsa-miR-6790-5p	0.595763	-0.370169	0.613828	-0.603049	0.546476	NA
hsa-miR-2115-5p	10.2018	-0.400023	0.469323	-0.85234	0.394025	NA
hsa-miR-6793-3p	11.9914	-0.565682	0.436509	-1.29592	0.195002	NA
hsa-miR-1277-3p	6.00708	0.327163	0.512107	0.638856	0.522916	NA
hsa-miR-6825-3p	16.5172	-0.579819	0.398627	-1.45454	0.145797	NA
hsa-miR-640	28.245	-0.683908	0.402542	-1.69897	0.0893244	NA
hsa-miR-3194-3p	2.1661	0.124442	0.636054	0.195647	0.844887	NA
hsa-miR-6829-5p	3.90317	-0.509443	0.562281	-0.906029	0.36492	NA
hsa-miR-211-3p	1.78928	-0.682006	0.650428	-1.04855	0.294386	NA
hsa-miR-655-5p	1.29164	-0.401289	0.645264	-0.621898	0.534009	NA
hsa-miR-4766-5p	0.29083	-0.72481	0.539675	-1.34305	0.179256	NA
hsa-miR-5580-5p	0.430289	-0.364581	0.546702	-0.666872	0.504854	NA
hsa-miR-6822-3p	0.674417	-1.31456	0.625904	-2.10026	0.0357061	NA
hsa-miR-7155-3p	7.4918	-0.693607	0.497665	-1.39372	0.163401	NA
hsa-miR-6824-5p	0.540739	-0.600241	0.609799	-0.984326	0.324955	NA
hsa-let-7f-1-3p	0.0999499	0.250392	0.38739	0.646356	0.518049	NA
hsa-miR-6129	1.91438	-0.864955	0.646932	-1.33701	0.181219	NA
hsa-miR-3148	2.93039	-1.93606	0.629369	-3.0762	0.0020966	NA
hsa-miR-5006-5p	4.92532	0.369753	0.59979	0.616471	0.537583	NA
hsa-miR-6821-5p	6.41834	-0.680192	0.539546	-1.26068	0.207426	NA
hsa-miR-6840-3p	6.96225	-0.438377	0.55837	-0.785101	0.432395	NA
hsa-miR-6888-5p	0.439115	-0.151109	0.61474	-0.24581	0.805829	NA
hsa-miR-6773-3p	4.07864	-0.861114	0.577077	-1.4922	0.135647	NA
hsa-miR-523-3p	13.9422	-0.289412	0.479276	-0.603852	0.545942	NA
hsa-miR-33b-3p	5.35508	0.47387	0.545966	0.867947	0.385423	NA
hsa-miR-376a-5p	55.0508	-0.112542	0.646583	-0.174057	NA	NA
hsa-miR-600	3.35602	-0.887925	0.615898	-1.44168	0.149394	NA
hsa-miR-3202	1.46816	-0.357308	0.648468	-0.551002	0.581632	NA
hsa-miR-4640-3p	13.8383	0.730595	0.431824	1.69188	0.0906689	NA
hsa-miR-4767	5.32915	0.528881	0.505579	1.04609	0.29552	NA
hsa-miR-551a	20.832	0.602386	0.473199	1.27301	0.203015	NA
hsa-miR-371a-5p	2.45932	-0.610782	0.609991	-1.0013	0.316684	NA
hsa-miR-4288	8.08823	-0.52198	0.526048	-0.992267	0.321067	NA
hsa-miR-3124-3p	4.83293	-0.529268	0.601895	-0.879336	0.379219	NA
hsa-miR-7846-3p	11.6299	0.0576183	0.447956	0.128625	0.897654	NA
hsa-miR-4659b-5p	6.64039	-0.237728	0.522419	-0.455053	0.649071	NA
hsa-miR-6802-5p	7.72198	0.614456	0.519051	1.18381	0.23649	NA
hsa-miR-6751-5p	4.78278	-0.622989	0.562617	-1.10731	0.268161	NA
hsa-miR-1273g-5p	11.8728	-0.9607	0.525932	-1.82666	0.0677503	NA
hsa-miR-7107-5p	10.5201	0.636173	0.432692	1.47027	0.141489	NA
hsa-miR-6728-5p	1.73628	0.126029	0.64919	0.194133	0.846071	NA
hsa-miR-6769b-3p	5.2866	0.17616	0.57035	0.308863	0.757426	NA
hsa-miR-6761-5p	4.73263	-0.0359797	0.508363	-0.0707756	0.943576	NA
hsa-miR-5090	19.2063	-0.0458002	0.437049	-0.104794	0.916539	NA
hsa-miR-4700-3p	3.19722	-1.43005	0.636856	-2.24549	0.0247366	NA
hsa-miR-4772-5p	10.508	-0.635928	0.512519	-1.24079	0.214684	NA
hsa-miR-6719-3p	9.70713	-0.364935	0.522208	-0.698831	0.484658	NA
hsa-miR-1224-3p	6.02059	-0.552082	0.521116	-1.05942	0.289407	NA
hsa-miR-3663-3p	1.24688	-0.889032	0.651294	-1.36502	0.172246	NA
hsa-miR-4754	6.41123	-0.0834503	0.494955	-0.168602	0.86611	NA
hsa-miR-6085	4.71742	-1.21022	0.552976	-2.18856	0.0286286	NA
hsa-miR-6750-5p	2.46792	-0.0546187	0.624091	-0.0875173	0.93026	NA
hsa-miR-520a-5p	6.44619	-0.762176	0.536401	-1.42091	0.155344	NA
hsa-miR-4796-3p	0.943486	0.661616	0.649765	1.01824	0.308564	NA
hsa-miR-3977	6.1662	0.0302706	0.546416	0.0553985	0.955821	NA
hsa-miR-3680-3p	0	NA	NA	NA	NA	NA
hsa-miR-4729	0.965962	-0.59778	0.640684	-0.933033	0.350803	NA
hsa-miR-4502	1.34323	-0.289674	0.650581	-0.445254	0.656136	NA
hsa-miR-4638-5p	2.2935	-0.106951	0.612787	-0.174533	0.861447	NA
hsa-miR-6875-3p	5.7496	-0.716812	0.549245	-1.30509	0.191864	NA
hsa-miR-198	0.530986	-0.823837	0.558819	-1.47425	0.140416	NA
hsa-miR-4753-5p	2.92495	-0.275829	0.592744	-0.465343	0.641686	NA
hsa-miR-145-3p	1.75667	1.24542	0.646653	1.92595	0.0541111	NA
hsa-miR-6819-5p	11.0944	-0.765567	0.476227	-1.60757	0.10793	NA
hsa-miR-4431	9.44925	-0.831841	0.476793	-1.74466	0.0810445	NA
hsa-miR-6814-5p	1.96958	-0.256112	0.635077	-0.403278	0.686744	NA
hsa-miR-3619-3p	3.19581	-1.78266	0.613084	-2.90769	0.00364111	NA
hsa-miR-7844-5p	0.407323	-0.876999	0.573845	-1.52829	0.126442	NA
hsa-miR-612	2.98773	-1.73301	0.633701	-2.73474	0.00624291	NA
hsa-miR-1910-3p	25.1263	-1.04539	0.511912	-2.04213	0.0411384	NA
hsa-miR-3686	3.30959	-0.881807	0.60264	-1.46324	0.143401	NA
hsa-miR-6818-3p	5.90252	-1.13489	0.566453	-2.0035	0.0451238	NA
hsa-miR-509-5p	1.3388	-1.21474	0.651315	-1.86506	0.0621726	NA
hsa-miR-508-5p	0.38693	-0.231196	0.527297	-0.438454	0.661057	NA
hsa-miR-6835-3p	2.48559	-1.56998	0.633316	-2.47898	0.0131757	NA
hsa-miR-4795-5p	4.24688	-0.895434	0.57728	-1.55113	0.120871	NA
hsa-miR-1295b-5p	1.72043	0.255739	0.643774	0.39725	0.691183	NA
hsa-miR-1229-3p	21.8737	0.323822	0.362688	0.892838	0.371944	NA
hsa-miR-6865-3p	5.17155	-1.26917	0.570632	-2.22414	0.0261387	NA
hsa-miR-4708-3p	4.51609	-0.229319	0.587023	-0.390648	0.696057	NA
hsa-miR-4474-5p	1.9381	0.121744	0.632869	0.192368	0.847454	NA
hsa-miR-1304-5p	25.3157	-0.848551	0.43967	-1.92997	0.0536102	NA
hsa-miR-891b	10.8458	-0.304836	0.541391	-0.563061	0.573394	NA
hsa-miR-5681a	0.132136	-0.303582	0.398482	-0.761845	0.446152	NA
hsa-miR-544b	26.2079	-1.16937	0.635519	-1.84002	0.065766	NA
hsa-miR-524-5p	0.634367	-0.456742	0.630468	-0.72445	0.46879	NA
hsa-miR-4321	4.50446	-1.06284	0.558736	-1.90223	0.0571416	NA
hsa-miR-656-3p	66.6589	-0.2508	0.651736	-0.384819	NA	NA
hsa-miR-6759-3p	2.82548	-0.944689	0.609176	-1.55076	0.120958	NA
hsa-miR-675-5p	8.93714	-0.738371	0.577692	-1.27814	0.2012	NA
hsa-miR-6767-5p	15.6222	-0.289014	0.396646	-0.728645	0.466219	NA
hsa-miR-3128	10.4376	-0.773139	0.523212	-1.47768	0.139494	NA
hsa-miR-5088-5p	9.17841	0.220367	0.439218	0.501726	0.61586	NA
hsa-miR-3671	2.6512	-0.299346	0.627123	-0.477333	0.633125	NA
hsa-miR-3197	4.52728	0.187629	0.543117	0.345467	0.729744	NA
hsa-miR-203a-5p	0.134578	-0.279992	0.388974	-0.719823	0.471634	NA
hsa-miR-487a-5p	22.5639	-0.553527	0.608756	-0.909276	0.363205	NA
hsa-miR-208a-3p	3.14134	0.317299	0.581857	0.545322	0.585532	NA
hsa-miR-654-5p	73.9974	-0.366563	0.633875	-0.578289	NA	NA
hsa-miR-5696	14.915	-0.216164	0.404146	-0.534867	0.592742	NA
hsa-miR-6508-5p	1.22459	-0.268356	0.646322	-0.415205	0.677992	NA
hsa-miR-3678-5p	6.33115	-0.0834907	0.558493	-0.149493	0.881165	NA
hsa-miR-548aq-3p	8.28293	-0.555044	0.507946	-1.09272	0.274516	NA
hsa-miR-3919	11.0031	-0.826806	0.477291	-1.73229	0.0832219	NA
hsa-miR-6797-5p	4.08806	-0.819619	0.561274	-1.46028	0.144213	NA
hsa-miR-6717-5p	2.12787	-0.419772	0.640847	-0.655027	0.512451	NA
hsa-miR-6854-3p	12.2241	-0.598513	0.443162	-1.35055	0.176839	NA
hsa-miR-6788-3p	6.13596	-0.336046	0.537145	-0.625615	0.531567	NA
hsa-miR-6833-5p	0.990078	-0.674583	0.644308	-1.04699	0.295105	NA
hsa-miR-6801-3p	4.81396	-0.203665	0.555945	-0.366341	0.714111	NA
hsa-miR-6881-5p	5.7882	-0.643735	0.637437	-1.00988	0.312553	NA
hsa-miR-3714	2.85624	0.158198	0.634566	0.249301	0.803128	NA
hsa-miR-1236-3p	4.17784	0.211468	0.54765	0.386138	0.699394	NA
hsa-miR-520f-3p	0.809029	0.638617	0.645784	0.988903	0.322711	NA
hsa-miR-3913-5p	27.629	-0.04613	0.341764	-0.134976	0.892631	NA
hsa-miR-4798-3p	2.26402	-1.15398	0.648295	-1.78002	0.0750727	NA
hsa-miR-410-3p	4243.66	-0.0313146	0.650026	-0.0481743	NA	NA
hsa-miR-4328	5.73836	-0.966023	0.499202	-1.93514	0.0529737	NA
hsa-miR-4539	2.19967	-0.406006	0.60608	-0.669889	0.502928	NA
hsa-miR-4740-3p	2.86498	-0.52207	0.590773	-0.883707	0.376855	NA
hsa-miR-6715b-3p	4.80145	-0.363033	0.556336	-0.652542	0.514051	NA
hsa-miR-6851-3p	3.35616	-0.659911	0.582644	-1.13261	0.257377	NA
hsa-miR-558	1.31741	-0.741628	0.647724	-1.14498	0.252219	NA
hsa-miR-4693-5p	2.03925	-0.815156	0.648837	-1.25633	0.208995	NA
hsa-miR-409-5p	2459.51	-0.159304	0.651884	-0.244375	NA	NA
hsa-miR-3934-3p	6.14514	-0.962703	0.567249	-1.69714	0.0896693	NA
hsa-miR-3614-3p	2.93822	-1.26524	0.615137	-2.05684	0.0397019	NA
hsa-miR-627-3p	11.8346	0.184116	0.427502	0.430678	0.666702	NA
hsa-miR-4723-3p	1.49152	0.122968	0.648146	0.189723	0.849526	NA
hsa-miR-6847-3p	0.839636	-0.611219	0.636409	-0.960419	0.336845	NA
hsa-miR-4800-5p	6.58306	-0.205181	0.512433	-0.400405	0.688858	NA
hsa-miR-196b-3p	1.77148	-0.073265	0.649218	-0.112851	0.910148	NA
hsa-miR-4436b-3p	2.9422	-0.173022	0.639854	-0.270408	0.786846	NA
hsa-miR-8064	0.433109	0.219487	0.598148	0.366944	0.713661	NA
hsa-miR-566	3.40058	-0.88222	0.612649	-1.44001	0.149865	NA
hsa-miR-6729-5p	20.6271	0.844407	0.475	1.7777	0.0754534	NA
hsa-miR-6515-3p	5.18776	-0.820612	0.556956	-1.47339	0.140647	NA
hsa-miR-556-3p	19.5467	0.555336	0.393242	1.4122	0.157892	NA
hsa-miR-573	1.29904	-0.122037	0.65046	-0.187616	0.851178	NA
hsa-miR-6864-5p	12.095	-0.586238	0.405729	-1.4449	0.148487	NA
hsa-miR-4684-3p	2.62729	-0.00187445	0.615513	-0.00304535	0.99757	NA
hsa-miR-1306-3p	22.1748	0.0625139	0.42809	0.14603	0.883898	NA
hsa-miR-6838-5p	2.19888	-0.36114	0.6198	-0.582672	0.560114	NA
hsa-miR-8058	1.08158	0.157176	0.640672	0.24533	0.806201	NA
hsa-miR-154-3p	7.18723	0.385489	0.65011	0.592959	NA	NA
hsa-miR-518c-5p	0.751706	-0.202713	0.635175	-0.319145	0.749616	NA
hsa-miR-5580-3p	0.56859	-1.05914	0.602466	-1.758	0.0787472	NA
hsa-miR-522-3p	1.99794	-0.627186	0.65085	-0.963642	0.335226	NA
hsa-miR-645	3.3605	-0.874248	0.610389	-1.43228	0.152063	NA
hsa-miR-4481	1.29616	-0.258917	0.650446	-0.39806	0.690586	NA
hsa-miR-3192-3p	6.19437	0.172113	0.558315	0.308272	0.757875	NA
hsa-miR-6774-5p	18.8487	0.865843	0.549278	1.57633	0.11495	NA
hsa-miR-1200	13.0155	-0.592776	0.490458	-1.20862	0.22681	NA
hsa-miR-3622b-3p	6.19866	-0.304243	0.548241	-0.554944	0.578933	NA
hsa-miR-3923	0.660066	-0.767511	0.621973	-1.23399	0.217205	NA
hsa-miR-5002-3p	4.31304	-0.0656453	0.557232	-0.117806	0.906221	NA
hsa-miR-4529-3p	0.660312	-0.388608	0.635147	-0.61184	0.540644	NA
hsa-miR-4789-5p	1.74774	-1.11828	0.652251	-1.7145	0.0864377	NA
hsa-miR-3126-3p	3.86164	0.287192	0.580145	0.495035	0.620575	NA
hsa-miR-4652-3p	11.1998	-0.593435	0.450588	-1.31702	0.187831	NA
hsa-miR-518a-5p	0.325456	-0.316374	0.553177	-0.571922	0.567375	NA
hsa-miR-3143	0.327723	0.171746	0.543173	0.31619	0.751858	NA
hsa-miR-4673	24.5021	0.596637	0.368498	1.6191	0.105425	NA
hsa-miR-4757-3p	6.45847	-0.733731	0.5188	-1.41429	0.157278	NA
hsa-miR-5187-3p	2.30473	0.111888	0.625959	0.178747	0.858137	NA
hsa-miR-6777-3p	17.1423	-0.705674	0.427579	-1.65039	0.0988622	NA
hsa-miR-5692b	0.591801	-0.228018	0.609992	-0.373805	0.70855	NA
hsa-miR-1288-5p	1.42874	-1.05625	0.647292	-1.6318	0.102721	NA
hsa-miR-1909-5p	10.7989	-0.0572406	0.445857	-0.128383	0.897846	NA
hsa-miR-4434	10.7046	-1.06417	0.539835	-1.97128	0.0486915	NA
hsa-miR-6877-3p	13.7349	-0.345922	0.393308	-0.879517	0.379121	NA
hsa-miR-4265	1.62199	-1.05296	0.634582	-1.65929	0.0970577	NA
hsa-miR-551b-5p	15.2582	0.634357	0.466759	1.35907	0.174125	NA
hsa-miR-4452	4.00601	-1.65394	0.615252	-2.68823	0.00718316	NA
hsa-miR-8066	1.0844	-0.985377	0.650538	-1.51471	0.129846	NA
hsa-miR-761	7.3724	-1.21983	0.541849	-2.25124	0.0243702	NA
hsa-miR-6791-3p	12.3566	0.00958583	0.424052	0.0226053	0.981965	NA
hsa-miR-4679	1.42953	-0.624808	0.651081	-0.959647	0.337233	NA
hsa-miR-6503-3p	11.9005	-0.0491051	0.525732	-0.0934033	0.925583	NA
hsa-miR-6890-5p	2.01676	-0.32508	0.642152	-0.506236	0.612691	NA
hsa-miR-4731-3p	2.83192	-0.660743	0.619836	-1.066	0.286426	NA
hsa-miR-6746-5p	22.8074	-0.980231	0.444502	-2.20523	0.0274377	NA
hsa-miR-519e-5p	1.02541	-0.852155	0.649447	-1.31212	0.189479	NA
hsa-miR-6782-5p	4.24212	0.441768	0.605007	0.730186	0.465276	NA
hsa-miR-6510-5p	14.2575	-0.443416	0.462015	-0.959743	0.337185	NA
hsa-miR-4280	0.51315	-1.02742	0.592238	-1.73481	0.0827737	NA
hsa-miR-5008-3p	4.52711	-0.230339	0.539916	-0.426619	0.669657	NA
hsa-miR-378a-5p	6.5868	-1.05193	0.535124	-1.96576	0.0493261	NA
hsa-miR-6893-5p	4.63637	-1.48109	0.533939	-2.7739	0.00553884	NA
hsa-miR-6734-5p	2.87892	-1.12887	0.612266	-1.84375	0.0652189	NA
hsa-miR-7851-3p	21.1597	-0.632065	0.39966	-1.58151	0.113762	NA
hsa-miR-449c-3p	0.0660678	-0.210799	0.384096	-0.548819	0.58313	NA
hsa-miR-4518	0.771126	-0.429959	0.617133	-0.696705	0.485988	NA
hsa-miR-517c-3p	0.724815	-0.785012	0.62556	-1.2549	0.209517	NA
hsa-miR-411-3p	5.76451	0.132146	0.536539	0.246293	NA	NA
hsa-miR-6800-5p	0.702643	-0.441599	0.634019	-0.696508	0.486111	NA
hsa-miR-4638-3p	10.4819	0.335914	0.435388	0.771527	0.440395	NA
hsa-miR-4779	3.06474	-0.602991	0.644056	-0.93624	0.349149	NA
hsa-miR-18b-3p	22.7277	0.736465	0.497812	1.4794	0.139032	NA
hsa-miR-6730-3p	3.39354	-1.04691	0.595727	-1.75737	0.0788556	NA
hsa-miR-3121-3p	3.21849	-0.200898	0.578422	-0.34732	0.728351	NA
hsa-miR-676-5p	6.76949	-0.991817	0.495115	-2.0032	0.0451554	NA
hsa-miR-4311	2.17123	-1.33783	0.621574	-2.15233	0.0313713	NA
hsa-miR-6785-5p	20.8629	0.776517	0.475646	1.63255	0.102563	NA
hsa-miR-4295	0.473771	-0.986335	0.588949	-1.67474	0.0939857	NA
hsa-miR-6744-5p	0.837396	-0.253032	0.645914	-0.391742	0.695249	NA
hsa-miR-5579-5p	3.53381	0.855776	0.570479	1.5001	0.133588	NA
hsa-miR-4259	2.66867	-0.232718	0.610581	-0.381142	0.703098	NA
hsa-miR-4653-5p	3.26742	-0.247498	0.619511	-0.399505	0.689521	NA
hsa-miR-6753-5p	4.12762	-0.547928	0.545131	-1.00513	0.314834	NA
hsa-miR-6830-3p	2.62267	-0.553313	0.62216	-0.889342	0.373819	NA
hsa-miR-5572	2.30314	0.209848	0.645706	0.32499	0.745188	NA
hsa-miR-4319	0.634394	-0.801471	0.630254	-1.27166	0.203492	NA
hsa-miR-5089-3p	4.61067	-0.341514	0.584895	-0.583888	0.559295	NA
hsa-miR-3157-5p	22.8071	-0.472511	0.431035	-1.09623	0.27298	NA
hsa-miR-4688	6.6314	-0.792527	0.54659	-1.44995	0.147073	NA
hsa-miR-3173-5p	8.1764	-0.359273	0.580539	-0.618861	0.536008	NA
hsa-miR-4437	9.31464	-0.483643	0.478835	-1.01004	0.312475	NA
hsa-miR-3133	3.97497	-1.21121	0.596172	-2.03164	0.0421899	NA
hsa-miR-325	0.616416	-0.71123	0.618807	-1.14936	0.250408	NA
hsa-miR-6769a-5p	1.72151	0.340079	0.626279	0.543015	0.587119	NA
hsa-miR-493-5p	64.7793	-0.0562691	0.49105	-0.114589	NA	NA
hsa-miR-138-2-3p	3.2607	-0.665995	0.639196	-1.04193	0.297446	NA
hsa-miR-580-5p	0.618727	-0.893271	0.572166	-1.56121	0.118474	NA
hsa-miR-4804-5p	15.7634	-0.515265	0.418184	-1.23215	0.217893	NA
hsa-miR-4445-3p	118.191	1.20601	0.629606	1.91549	NA	NA
hsa-miR-6133	1.61354	0.0555571	0.638589	0.0869999	0.930672	NA
hsa-miR-4536-3p	1.48662	-0.83836	0.638938	-1.31211	0.189481	NA
hsa-miR-548ay-3p	10.9361	0.180917	0.456768	0.396081	0.692045	NA
hsa-miR-6772-5p	2.07899	-0.84093	0.619534	-1.35736	0.174667	NA
hsa-miR-1267	1.81236	-0.386997	0.626488	-0.617725	0.536757	NA
hsa-miR-1343-5p	20.5638	0.530819	0.588195	0.902454	0.366816	NA
hsa-miR-33a-3p	0.362158	-0.345621	0.584177	-0.591637	0.554094	NA
hsa-miR-4734	6.39381	0.226054	0.485972	0.465159	0.641818	NA
hsa-miR-6812-5p	6.54334	0.0273027	0.544301	0.050161	0.959994	NA
hsa-miR-4664-5p	3.00892	0.0709116	0.592959	0.119589	0.904808	NA
hsa-miR-203b-5p	24.5505	-1.12846	0.564511	-1.99901	0.0456074	NA
hsa-miR-4746-3p	1.6793	-0.106836	0.641055	-0.166657	0.86764	NA
hsa-miR-1324	10.7232	-0.584588	0.560658	-1.04268	0.297096	NA
hsa-miR-6734-3p	4.56851	-0.6965	0.55697	-1.25052	0.211111	NA
hsa-miR-5589-3p	2.57559	-0.443335	0.626588	-0.707538	0.479232	NA
hsa-miR-6509-3p	6.35408	-0.595095	0.505684	-1.17681	0.239271	NA
hsa-miR-7849-3p	2.01718	-0.66357	0.640506	-1.03601	0.300198	NA
hsa-miR-514b-5p	0.0660678	-0.210799	0.384096	-0.548819	0.58313	NA
hsa-miR-200a-5p	1.04314	0.460688	0.647886	0.711063	0.477045	NA
hsa-miR-8071	11.3298	0.380576	0.650064	0.585444	0.558249	NA
hsa-miR-885-3p	0.916211	-0.130429	0.647218	-0.201523	0.84029	NA
hsa-miR-509-3-5p	3.50949	-0.0320488	0.584349	-0.0548453	0.956262	NA
hsa-miR-6875-5p	8.47495	-0.374532	0.476916	-0.78532	0.432266	NA
hsa-miR-543	140.152	-0.0659288	0.651428	-0.101207	NA	NA
hsa-miR-6811-3p	2.3696	-0.778051	0.643156	-1.20974	0.226379	NA
hsa-miR-3606-5p	0.576398	0.0434125	0.620354	0.0699802	0.944209	NA
hsa-miR-4275	1.15869	-0.359146	0.650613	-0.552011	0.580941	NA
hsa-miR-630	3.71568	-0.911893	0.586433	-1.55498	0.119951	NA
hsa-miR-6849-3p	21.6308	-1.50565	0.427159	-3.52481	0.000423787	NA
hsa-miR-4755-3p	13.6739	-0.903088	0.447117	-2.0198	0.0434037	NA
hsa-miR-6849-5p	0.610457	0.0427218	0.63193	0.0676053	0.9461	NA
hsa-miR-4711-5p	2.74802	-0.838223	0.594842	-1.40915	0.15879	NA
hsa-miR-337-3p	52.9027	-0.0733136	0.651618	-0.11251	NA	NA
hsa-miR-3692-3p	3.95174	-0.360052	0.560633	-0.642223	0.520728	NA
hsa-miR-542-5p	24.2387	0.59874	0.541139	1.10644	0.268535	NA
hsa-miR-7162-3p	24.1049	-0.462152	0.483279	-0.956283	0.338929	NA
hsa-miR-549a	2.29483	-0.18158	0.610944	-0.297213	0.766304	NA
hsa-miR-6505-3p	16.9228	-0.113101	0.432673	-0.261402	0.793783	NA
hsa-miR-136-3p	2042.7	-0.02301	0.60597	-0.0379721	NA	NA
hsa-miR-519b-3p	1.59492	-0.983022	0.625054	-1.5727	0.115789	NA
hsa-miR-5195-5p	6.49302	-0.352498	0.501874	-0.702364	0.482452	NA
hsa-miR-617	0.974356	-0.219905	0.649932	-0.33835	0.735099	NA
hsa-miR-4303	1.02396	-0.461319	0.649911	-0.709818	0.477817	NA
hsa-miR-6788-5p	0.4988	-0.528358	0.583667	-0.905239	0.365339	NA
hsa-miR-3180	24.6985	0.463078	0.359283	1.28889	0.197435	NA
hsa-miR-4524a-5p	5.13258	-0.703665	0.545227	-1.29059	0.196846	NA
hsa-miR-4654	7.09311	0.377587	0.536709	0.703523	0.48173	NA
hsa-miR-519d-3p	0.780398	-0.954409	0.639498	-1.49244	0.135585	NA
hsa-miR-4423-5p	18.9425	-0.148477	0.454862	-0.326421	0.744106	NA
hsa-miR-3188	6.77304	0.02302	0.502667	0.0457957	0.963473	NA
hsa-miR-6832-3p	8.43478	-0.0175193	0.482636	-0.0362992	0.971044	NA
hsa-miR-4763-3p	1.05713	-1.19922	0.649921	-1.84517	0.0650128	NA
hsa-miR-6820-3p	3.34637	-0.409551	0.63577	-0.644182	0.519457	NA
hsa-miR-3678-3p	3.09955	-0.415166	0.620544	-0.669036	0.503472	NA
hsa-miR-8077	2.36751	-0.149195	0.650772	-0.229258	0.818669	NA
hsa-miR-4696	5.72696	-1.07385	0.568917	-1.88752	0.0590899	NA
hsa-miR-5008-5p	2.24242	-0.831869	0.599318	-1.38803	0.165129	NA
hsa-miR-363-5p	23.0318	-0.124812	0.420894	-0.29654	0.766817	NA
hsa-miR-3682-5p	0.981761	-0.779772	0.643666	-1.21145	0.225721	NA
hsa-miR-6838-3p	10.605	-1.20991	0.522569	-2.31532	0.0205956	NA
hsa-miR-4293	6.59827	-0.790141	0.510924	-1.5465	0.121985	NA
hsa-miR-382-3p	73.6154	-0.147497	0.651902	-0.226256	NA	NA
hsa-miR-555	4.2938	-1.06869	0.605668	-1.76449	0.0776502	NA
hsa-miR-4462	3.94512	1.22041	0.600399	2.03267	0.0420856	NA
hsa-miR-4661-5p	4.70211	0.0270168	0.539843	0.0500457	0.960086	NA
hsa-miR-496	18.8724	-0.0598318	0.651831	-0.0917903	NA	NA
hsa-miR-6763-5p	3.0967	0.243966	0.577509	0.422446	0.6727	NA
hsa-miR-409-3p	3203.59	-0.122029	0.631359	-0.19328	NA	NA
hsa-miR-5100	13.3146	-0.852938	0.426748	-1.99869	0.0456415	NA
hsa-miR-6797-3p	4.80629	0.215068	0.510439	0.42134	0.673507	NA
hsa-miR-4483	1.23462	-0.853336	0.650984	-1.31084	0.189912	NA
hsa-miR-3910	12.3692	-0.506577	0.536491	-0.944241	0.345046	NA
hsa-miR-4742-3p	13.5965	-0.986207	0.402714	-2.4489	0.0143293	NA
hsa-miR-29b-2-5p	9.20421	0.155621	0.470501	0.330757	0.740828	NA
hsa-miR-548ar-5p	5.99374	-0.769789	0.541599	-1.42133	0.155222	NA
hsa-miR-4268	8.80649	-0.433232	0.52787	-0.820717	0.411807	NA
hsa-miR-4720-3p	4.08943	-0.373123	0.582626	-0.640415	0.521903	NA
hsa-miR-412-5p	52.0417	-0.816012	0.649601	-1.25617	NA	NA
hsa-miR-6857-5p	13.5412	-0.698124	0.423949	-1.64672	0.099616	NA
hsa-miR-3157-3p	8.19976	-0.183983	0.563179	-0.326687	0.743904	NA
hsa-miR-608	1.78901	0.318158	0.649036	0.490201	0.623992	NA
hsa-miR-6079	19.8775	-1.04367	0.4368	-2.38936	0.016878	NA
hsa-miR-1273c	26.2599	-0.324401	0.347706	-0.932974	0.350833	NA
hsa-miR-6861-3p	2.50778	-0.80436	0.63567	-1.26537	0.205738	NA
hsa-miR-5011-3p	6.84515	-0.966352	0.542113	-1.78257	0.0746571	NA
hsa-miR-520e	0.132136	-0.303582	0.398482	-0.761845	0.446152	NA
hsa-miR-5586-3p	7.16741	-0.704733	0.54423	-1.29492	0.195349	NA
hsa-miR-4763-5p	1.65677	-0.271541	0.640832	-0.423732	0.671762	NA
hsa-miR-3672	0.555102	-1.02001	0.592399	-1.72183	0.0850994	NA
hsa-miR-4798-5p	1.3533	-0.880222	0.650868	-1.35238	0.176253	NA
hsa-miR-548ao-5p	5.25347	-0.901427	0.54015	-1.66885	0.0951476	NA
hsa-miR-2113	26.1456	0.305055	0.543629	0.561145	0.574699	NA
hsa-miR-664b-3p	18.5412	-0.792828	0.476208	-1.66488	0.0959375	NA
hsa-miR-4703-3p	4.00498	-0.0924368	0.618301	-0.149501	0.881158	NA
hsa-miR-6132	3.13602	0.159615	0.578998	0.275673	0.782799	NA
hsa-miR-7159-5p	1.77853	-0.267972	0.642793	-0.416887	0.676761	NA
hsa-miR-4725-3p	0.903002	-0.391795	0.642207	-0.610077	0.541811	NA
hsa-miR-548ar-3p	3.2592	0.380163	0.601025	0.632524	0.527045	NA
hsa-miR-6731-5p	0.985557	-0.890133	0.64687	-1.37606	0.168802	NA
hsa-miR-7641	6.10222	-0.465382	0.569104	-0.817744	0.413503	NA
hsa-miR-4769-3p	4.09092	-0.970765	0.592223	-1.63919	0.101174	NA
hsa-miR-514b-3p	1.19645	-0.493914	0.650862	-0.758861	0.447936	NA
hsa-miR-4681	18.4899	1.39289	0.432901	3.21757	0.00129284	NA
hsa-miR-3616-3p	2.20793	-0.580979	0.618357	-0.939553	0.347447	NA
hsa-miR-4722-3p	3.48386	-1.0683	0.603432	-1.77038	0.0766641	NA
hsa-miR-4433a-3p	6.43613	0.0319779	0.575223	0.0555923	0.955667	NA
hsa-miR-182-3p	4.54446	-1.19693	0.579401	-2.06581	0.0388464	NA
hsa-miR-939-3p	12.4885	-0.545564	0.476793	-1.14424	0.252526	NA
hsa-miR-6869-3p	9.24088	-1.628	0.48413	-3.36272	0.000771779	NA
hsa-miR-3924	0.561195	-0.330653	0.625679	-0.528471	0.597173	NA
hsa-miR-1178-5p	7.08047	-0.566829	0.530577	-1.06833	0.285374	NA
hsa-miR-3187-5p	2.76907	-0.196018	0.639022	-0.306747	0.759036	NA
hsa-miR-514a-5p	0.251451	-0.660099	0.526859	-1.2529	0.210244	NA
hsa-miR-942-3p	10.1068	-0.60165	0.514205	-1.17006	0.241977	NA
hsa-miR-5684	15.4146	-1.32543	0.460777	-2.87651	0.00402096	NA
hsa-miR-1236-5p	1.3567	0.1234	0.639567	0.192943	0.847004	NA
hsa-miR-1182	3.57422	-1.08676	0.597207	-1.81975	0.0687978	NA
hsa-miR-548ao-3p	17.3536	-0.340963	0.440578	-0.7739	0.43899	NA
hsa-miR-1273a	27.4323	-0.737635	0.368844	-1.99986	0.0455157	NA
hsa-miR-7113-5p	3.29967	-0.189791	0.588453	-0.322525	0.747055	NA
hsa-miR-6796-5p	2.43504	-0.0996461	0.614595	-0.162133	0.871201	NA
hsa-miR-1225-5p	1.19956	-0.303566	0.644115	-0.471292	0.637432	NA
hsa-miR-7109-5p	7.17331	-0.685727	0.554772	-1.23605	0.21644	NA
hsa-miR-449a	9.7209	-0.116442	0.530984	-0.219296	0.82642	NA
hsa-miR-503-3p	1.87012	-0.116917	0.645954	-0.180999	0.856368	NA
hsa-miR-4489	0.747808	-0.851825	0.627509	-1.35747	0.174632	NA
hsa-miR-668-3p	50.6589	-0.227537	0.649394	-0.350383	NA	NA
hsa-miR-520g-3p	0	NA	NA	NA	NA	NA
hsa-miR-302a-3p	5.25068	1.33069	0.61067	2.17907	0.0293267	NA
hsa-miR-378f	3.02071	-0.938154	0.627891	-1.49414	0.13514	NA
hsa-miR-548f-5p	13.5851	0.019376	0.442115	0.0438256	0.965043	NA
hsa-miR-1304-3p	16.8029	-1.44097	0.606638	-2.37534	0.0175327	NA
hsa-miR-6827-3p	11.901	-1.02228	0.409304	-2.4976	0.0125036	NA
hsa-miR-6799-3p	1.62815	-0.888575	0.644696	-1.37829	0.168115	NA
hsa-miR-1252-3p	22.4514	0.270612	0.391394	0.691406	0.489311	NA
hsa-miR-5703	2.67154	-0.139071	0.59757	-0.232728	0.815972	NA
hsa-miR-3659	11.7168	0.6567	0.496995	1.32134	0.186388	NA
hsa-miR-143-3p	11389.1	0.400551	0.454289	0.881709	NA	NA
hsa-miR-891a-3p	1.1607	-0.690878	0.646681	-1.06834	0.285365	NA
hsa-miR-4762-5p	13.0339	0.0528213	0.430572	0.122677	0.902363	NA
hsa-miR-302c-3p	1.65801	1.634	0.637852	2.56172	0.0104156	NA
hsa-miR-6740-5p	1.11408	-0.118183	0.648805	-0.182154	0.855462	NA
hsa-miR-520d-3p	0.392933	0.0121012	0.558228	0.021678	0.982705	NA
hsa-miR-7977	15.8183	-0.246596	0.430437	-0.572897	0.566714	NA
hsa-miR-194-3p	1.63848	-0.293326	0.636856	-0.460585	0.645096	NA
hsa-miR-1289	22.5814	0.142275	0.439469	0.323743	0.746133	NA
hsa-miR-4329	13.0713	-1.32923	0.476923	-2.7871	0.00531822	NA
hsa-miR-584-3p	6.6647	-0.010629	0.555424	-0.0191368	0.984732	NA
hsa-miR-545-5p	25.6789	0.13608	0.338146	0.402429	0.687368	NA
hsa-miR-3664-5p	3.74828	-0.0953148	0.595471	-0.160066	0.872829	NA
hsa-miR-369-3p	250.029	-0.146227	0.649807	-0.225032	NA	NA
hsa-miR-570-3p	6.32189	-0.607153	0.537556	-1.12947	0.2587	NA
hsa-miR-6782-3p	1.76812	-0.354187	0.630875	-0.561422	0.57451	NA
hsa-miR-5587-3p	19.9573	0.640669	0.39315	1.62958	0.103191	NA
hsa-miR-3135a	10.332	-0.596957	0.49519	-1.20551	0.228005	NA
hsa-miR-1263	1.03864	-1.2159	0.646422	-1.88097	0.0599765	NA
hsa-miR-4283	8.74843	-0.283807	0.46742	-0.607178	0.543733	NA
hsa-miR-7854-3p	14.4271	0.0603647	0.433674	0.139194	0.889297	NA
hsa-miR-6716-5p	3.29057	-0.4054	0.606607	-0.668308	0.503937	NA
hsa-miR-1261	5.24289	0.310818	0.5605	0.554536	0.579212	NA
hsa-miR-3920	1.91669	-0.74345	0.620264	-1.1986	0.230683	NA
hsa-miR-6883-5p	1.11498	-0.762273	0.649728	-1.17322	0.240708	NA
hsa-miR-3120-5p	3.76164	-0.162908	0.596069	-0.273303	0.78462	NA
hsa-miR-3144-3p	1.56895	-0.509024	0.6504	-0.782632	0.433843	NA
hsa-miR-4666b	2.63404	-0.250242	0.590093	-0.424073	0.671513	NA
hsa-miR-1825	6.11219	-0.29279	0.543147	-0.539061	0.589845	NA
hsa-miR-520b	0.310166	-0.0121715	0.5431	-0.0224112	0.98212	NA
hsa-miR-5691	3.75617	-0.0544819	0.559862	-0.097313	0.922478	NA
hsa-miR-6165	5.11212	-0.606984	0.553194	-1.09724	0.272539	NA
hsa-miR-512-5p	5.28944	-1.85203	0.600758	-3.08283	0.00205044	NA
hsa-miR-127-3p	30324.6	0.0582673	0.614926	0.094755	NA	NA
hsa-miR-6808-3p	3.72969	-0.525223	0.559939	-0.938	0.348244	NA
hsa-miR-3689a-5p	2.20683	-0.309132	0.624301	-0.495166	0.620483	NA
hsa-miR-1185-1-3p	93.7969	0.0050853	0.650576	0.00781661	NA	NA
hsa-miR-4633-5p	0.733246	-0.790606	0.632512	-1.24995	0.211319	NA
hsa-miR-4252	2.8305	-0.675186	0.588428	-1.14744	0.2512	NA
hsa-miR-6872-5p	7.55118	-0.466419	0.571002	-0.816843	0.414018	NA
hsa-miR-889-5p	13.1012	-0.178711	0.573533	-0.311596	0.755348	NA
hsa-miR-4699-5p	1.40564	-0.0109941	0.64256	-0.0171098	0.986349	NA
hsa-miR-433-3p	201.958	-0.142789	0.621177	-0.229868	NA	NA
hsa-miR-6777-5p	1.01428	-0.582833	0.635989	-0.91642	0.359447	NA
hsa-miR-6735-5p	21.4404	-0.0599372	0.456924	-0.131175	0.895637	NA
hsa-miR-937-5p	2.66696	-0.713599	0.643316	-1.10925	0.267322	NA
hsa-miR-3689f	0.681881	0.228931	0.615854	0.37173	0.710094	NA
hsa-miR-2117	5.00651	-1.66888	0.542736	-3.07493	0.0021055	NA
hsa-miR-96-3p	0.882954	-0.469011	0.633143	-0.740766	0.458835	NA
hsa-miR-5582-5p	2.29636	-0.388586	0.604795	-0.642509	0.520543	NA
hsa-miR-4776-5p	1.39986	-0.605211	0.643397	-0.940649	0.346885	NA
hsa-miR-5571-5p	10.2079	-0.980991	0.581146	-1.68803	0.0914054	NA
hsa-miR-875-5p	15.9293	-0.46111	0.455694	-1.01189	0.311593	NA
hsa-miR-5688	5.12342	0.608544	0.571095	1.06557	0.286616	NA
hsa-miR-3591-3p	3.57468	0.732419	0.569795	1.28541	0.19865	NA
hsa-miR-4784	5.80578	-0.839357	0.519932	-1.61436	0.106449	NA
hsa-miR-3658	1.69222	0.0705891	0.627635	0.112468	0.910452	NA
hsa-miR-3190-3p	1.05717	1.34346	0.650297	2.06592	0.0388359	NA
hsa-miR-8086	0.447317	-0.130854	0.573299	-0.228247	0.819455	NA
hsa-miR-3944-3p	4.38214	-0.36574	0.555698	-0.658164	0.510433	NA
hsa-miR-1266-5p	15.5852	0.0591112	0.385572	0.153308	0.878156	NA
hsa-miR-3921	14.2912	-0.931853	0.525689	-1.77263	0.07629	NA
hsa-miR-512-3p	4.87901	0.907352	0.610475	1.4863	0.137199	NA
hsa-miR-8065	0.5344	-0.253114	0.625697	-0.404532	0.685822	NA
hsa-miR-1255b-2-3p	4.16636	-0.551033	0.606758	-0.908158	0.363795	NA
hsa-miR-6508-3p	1.15519	-0.489495	0.647214	-0.756311	0.449463	NA
hsa-miR-5087	0.590078	0.211087	0.618799	0.341124	0.73301	NA
hsa-miR-4447	1.17973	-0.98411	0.647387	-1.52013	0.128479	NA
hsa-miR-3978	0.198204	-0.351754	0.414934	-0.847735	0.396586	NA
hsa-miR-4724-3p	0.972814	0.141875	0.649757	0.21835	0.827156	NA
hsa-miR-187-5p	0.795726	-0.187893	0.640769	-0.29323	0.769346	NA
hsa-miR-6130	4.47359	-0.900471	0.577015	-1.56057	0.118626	NA
hsa-miR-4661-3p	16.6949	-0.342035	0.408921	-0.836433	0.402912	NA
hsa-miR-4316	1.27757	-0.775143	0.64893	-1.19449	0.232285	NA
hsa-miR-3150b-5p	4.34516	-0.417502	0.533739	-0.782223	0.434084	NA
hsa-miR-6748-5p	7.7952	0.217524	0.563718	0.385874	0.69959	NA
hsa-miR-520c-3p	0.244098	0.134437	0.486563	0.276299	0.782318	NA
hsa-miR-3621	147.096	1.4613	0.61189	2.38817	NA	NA
hsa-miR-1234-3p	4.17123	0.365043	0.592746	0.615851	0.537993	NA
hsa-miR-4320	1.17517	-0.45246	0.650413	-0.69565	0.486648	NA
hsa-miR-329-5p	6.70188	-0.429056	0.647181	-0.662961	NA	NA
hsa-miR-627-5p	18.169	-0.203473	0.3627	-0.560997	0.5748	NA
hsa-miR-1279	12.1158	-1.04309	0.627178	-1.66314	0.0962843	NA
hsa-miR-3679-5p	11.3075	0.933925	0.484098	1.92921	0.0537053	NA
hsa-miR-4433b-5p	2.19062	-0.0531048	0.600118	-0.0884906	0.929487	NA
hsa-miR-665	14.4652	-0.401875	0.48991	-0.820303	0.412043	NA
hsa-miR-578	1.8558	-0.77007	0.651391	-1.18219	0.237129	NA
hsa-miR-4266	6.71178	-0.180644	0.52765	-0.342357	0.732082	NA
hsa-miR-610	1.1799	0.302001	0.649691	0.464837	0.642048	NA
hsa-miR-431-5p	125.261	0.0781455	0.624338	0.125165	NA	NA
hsa-miR-6891-3p	10.2567	-1.00815	0.50598	-1.99246	0.0463204	NA
hsa-miR-5697	1.1077	-0.416563	0.650346	-0.640526	0.521831	NA
hsa-miR-3119	2.41902	-0.82783	0.638806	-1.2959	0.19501	NA
hsa-miR-3617-3p	2.43118	-0.0289833	0.594218	-0.0487755	0.961098	NA
hsa-miR-548aj-3p	0.755532	-0.393649	0.638641	-0.616386	0.53764	NA
hsa-miR-6774-3p	3.13389	-0.0834002	0.580792	-0.143597	0.885818	NA
hsa-miR-4643	0.684692	-0.715772	0.628825	-1.13827	0.255008	NA
hsa-miR-4732-5p	0.227335	-0.514207	0.485128	-1.05994	0.289171	NA
hsa-let-7i-3p	25.533	0.345319	0.517657	0.667081	0.504721	NA
hsa-miR-6837-5p	49.5475	-1.58507	0.580129	-2.73226	NA	NA
hsa-miR-4519	9.12346	0.077118	0.532122	0.144925	0.88477	NA
hsa-miR-6889-5p	2.62899	-0.543335	0.59207	-0.917687	0.358783	NA
hsa-miR-6872-3p	2.60212	0.226472	0.587801	0.385287	0.700025	NA
hsa-miR-4282	1.3818	-1.26173	0.648767	-1.94482	0.0517969	NA
hsa-miR-451a	6.75178	0.550477	0.482549	1.14077	0.253966	NA
hsa-miR-487a-3p	336.648	0.00962109	0.631422	0.0152372	NA	NA
hsa-miR-1204	0.933877	-0.561903	0.650412	-0.863919	0.387633	NA
hsa-miR-5681b	0.132136	-0.303582	0.398482	-0.761845	0.446152	NA
hsa-miR-155-5p	8.86049	-0.987067	0.607216	-1.62556	0.104043	NA
hsa-miR-4785	23.7123	-0.253103	0.403138	-0.627833	0.530114	NA
hsa-miR-8067	1.29348	-1.17465	0.650659	-1.80532	0.0710246	NA
hsa-miR-3925-3p	2.59858	-1.30531	0.612568	-2.13088	0.033099	NA
hsa-miR-4632-3p	18.94	-0.767463	0.46104	-1.66463	0.0959858	NA
hsa-miR-4678	0.686336	-0.287	0.619472	-0.463298	0.643151	NA
hsa-miR-5685	14.9862	-0.555954	0.467856	-1.1883	0.234714	NA
hsa-miR-6841-3p	3.43353	0.240061	0.591153	0.40609	0.684677	NA
hsa-miR-552-3p	2.57956	-0.226055	0.593706	-0.380753	0.703387	NA
hsa-miR-4418	2.245	-1.06511	0.629306	-1.69252	0.0905476	NA
hsa-miR-4747-5p	7.6398	0.162117	0.595042	0.272447	0.785278	NA
hsa-miR-6818-5p	19.6091	0.193643	0.439051	0.441048	0.659178	NA
hsa-let-7a-2-3p	1.92808	0.791656	0.64957	1.21874	0.222943	NA
hsa-miR-548x-3p	1.43618	-1.30086	0.650421	-2.00003	0.0454973	NA
hsa-miR-3657	0.975491	-0.890706	0.630038	-1.41373	0.15744	NA
hsa-miR-622	4.91957	-0.0715865	0.521766	-0.1372	0.890872	NA
hsa-miR-4501	3.25284	0.315061	0.58221	0.541147	0.588406	NA
hsa-miR-6802-3p	11.2167	0.154711	0.411781	0.375712	0.707131	NA
hsa-miR-1290	17.8821	-0.213033	0.496902	-0.428722	0.668125	NA
hsa-miR-4775	21.0806	-0.0413407	0.456464	-0.0905672	0.927837	NA
hsa-miR-6775-3p	14.158	-0.485864	0.420176	-1.15633	0.247545	NA
hsa-miR-7114-3p	17.3383	0.0231611	0.395378	0.0585797	0.953287	NA
hsa-miR-520a-3p	0.694938	-0.143984	0.643431	-0.223776	0.822931	NA
hsa-miR-6780b-5p	0.967772	-0.163307	0.649748	-0.251339	0.801552	NA
hsa-miR-6885-3p	10.8442	-0.147141	0.439175	-0.335041	0.737595	NA
hsa-miR-616-3p	4.95307	-1.47155	0.586058	-2.51093	0.0120414	NA
hsa-miR-675-3p	13.722	-0.849665	0.527118	-1.61191	0.106982	NA
hsa-miR-711	2.55509	-0.556491	0.581948	-0.956256	0.338943	NA
hsa-miR-1911-5p	7.04941	0.0271009	0.646984	0.041888	0.966588	NA
hsa-miR-6735-3p	6.67444	-0.380756	0.513431	-0.741591	0.458335	NA
hsa-miR-616-5p	20.0534	0.166245	0.462665	0.35932	0.719356	NA
hsa-miR-509-3p	14.4022	-1.14067	0.456076	-2.50105	0.0123827	NA
hsa-miR-5680	23.0398	-0.213482	0.402697	-0.530131	0.596021	NA
hsa-miR-4473	6.69852	-0.144279	0.509003	-0.283454	0.776829	NA
hsa-miR-561-3p	24.5484	0.685714	0.458186	1.49658	0.134502	NA
hsa-miR-149-3p	7.54453	0.773375	0.548123	1.41095	0.158259	NA
hsa-miR-3941	2.97807	-1.09184	0.632695	-1.7257	0.0844014	NA
hsa-miR-6804-5p	3.4379	-0.143683	0.577462	-0.248818	0.803502	NA
hsa-miR-7852-3p	0.589248	-1.07013	0.603625	-1.77284	0.0762548	NA
hsa-miR-7158-3p	4.3568	-0.844698	0.550676	-1.53393	0.125047	NA
hsa-miR-3612	1.1769	0.202105	0.645133	0.313276	0.754071	NA
hsa-miR-4475	2.09043	-0.686729	0.646748	-1.06182	0.288318	NA
hsa-miR-5704	2.93826	-0.293155	0.590984	-0.496045	0.619862	NA
hsa-miR-379-3p	94.7419	0.00819691	0.62847	0.0130426	NA	NA
hsa-miR-299-5p	29.9148	-0.188068	0.617415	-0.304606	NA	NA
hsa-miR-587	2.46923	-0.999083	0.617176	-1.6188	0.105491	NA
hsa-miR-208b-5p	0.724551	-0.651642	0.64426	-1.01146	0.311798	NA
hsa-miR-6894-5p	5.64448	-2.00053	0.582829	-3.43244	0.000598172	NA
hsa-miR-1226-5p	4.68943	-0.0465074	0.570464	-0.0815255	0.935024	NA
hsa-miR-1229-5p	0.484437	-0.0939225	0.60094	-0.156293	0.875802	NA
hsa-miR-4716-3p	15.9318	-0.424543	0.436848	-0.971831	0.331135	NA
hsa-miR-3154	1.16281	0.197838	0.628385	0.314835	0.752887	NA
hsa-miR-8081	2.86719	-0.580431	0.63445	-0.914857	0.360267	NA
hsa-miR-2681-3p	13.4681	-1.04132	0.503557	-2.06793	0.0386463	NA
hsa-miR-1207-3p	2.40564	0.15171	0.603536	0.251369	0.801529	NA
hsa-miR-4480	0.737694	-1.31086	0.627623	-2.08861	0.0367427	NA
hsa-miR-6810-5p	1.36566	-0.555775	0.650475	-0.854413	0.392876	NA
hsa-miR-6807-3p	14.5258	-0.353665	0.521304	-0.678424	0.497503	NA
hsa-miR-944	1.90787	-1.13217	0.643076	-1.76055	0.0783154	NA
hsa-miR-4799-3p	0.53614	-0.31498	0.610551	-0.515895	0.605928	NA
hsa-miR-6765-3p	13.4437	-0.284284	0.439281	-0.647158	0.51753	NA
hsa-miR-3130-5p	16.3828	0.530569	0.531613	0.998037	0.318262	NA
hsa-miR-4324	12.4897	1.17142	0.508731	2.30264	0.0212992	NA
hsa-miR-6845-3p	6.55077	-0.562954	0.530365	-1.06145	0.288487	NA
hsa-miR-4458	3.25062	-0.579507	0.580831	-0.99772	0.318415	NA
hsa-miR-5581-5p	11.4884	-0.18462	0.496552	-0.371804	0.710039	NA
hsa-miR-890	0.673251	-0.167309	0.634505	-0.263685	0.792023	NA
hsa-miR-3667-3p	4.00258	-0.657623	0.573801	-1.14608	0.251762	NA
hsa-miR-4491	0.885004	-0.682715	0.647084	-1.05506	0.291396	NA
hsa-miR-4772-3p	1.33272	-0.853849	0.650585	-1.31243	0.189374	NA
hsa-let-7f-2-3p	1.12354	0.122608	0.649257	0.188844	0.850215	NA
hsa-miR-4999-3p	8.33462	-0.634183	0.537721	-1.17939	0.238243	NA
hsa-miR-2114-3p	5.95783	-0.153439	0.555441	-0.276248	0.782358	NA
hsa-miR-1272	1.87989	-0.112883	0.630812	-0.178949	0.857978	NA
hsa-miR-613	0.56859	-1.05914	0.602466	-1.758	0.0787472	NA
hsa-miR-370-5p	10.76	-0.0298137	0.597501	-0.0498973	NA	NA
hsa-miR-548j-5p	6.56665	1.08972	0.559215	1.94866	0.0513364	NA
hsa-miR-6718-5p	2.22185	0.63821	0.60921	1.0476	0.294821	NA
hsa-miR-7152-3p	28.7094	-0.219365	0.384037	-0.571207	0.567859	NA
hsa-miR-135a-3p	14.2741	0.555582	0.481529	1.15379	0.248587	NA
hsa-miR-3613-3p	0	NA	NA	NA	NA	NA
hsa-miR-6801-5p	1.10108	-0.673267	0.647082	-1.04047	0.298123	NA
hsa-miR-7155-5p	1.60947	-1.15972	0.64627	-1.79448	0.0727361	NA
hsa-miR-367-3p	0.253864	0.564636	0.493137	1.14499	0.252214	NA
hsa-miR-4781-5p	12.0577	-0.234689	0.410494	-0.571725	0.567509	NA
hsa-miR-183-3p	4.90167	0.600507	0.511515	1.17398	0.240404	NA
hsa-miR-4710	2.42815	-0.309729	0.620035	-0.499534	0.617403	NA
hsa-miR-5091	12.199	-0.230511	0.576292	-0.39999	0.689164	NA
hsa-miR-372-3p	3.34886	-0.610635	0.577657	-1.05709	0.290471	NA
hsa-miR-6886-3p	2.88235	0.313936	0.607256	0.516975	0.605174	NA
hsa-miR-6810-3p	4.66843	-0.396788	0.627371	-0.632461	0.527086	NA
hsa-miR-552-5p	3.92258	-0.792694	0.556951	-1.42327	0.154657	NA
hsa-miR-646	1.94323	-1.05697	0.648811	-1.62909	0.103295	NA
hsa-miR-494-5p	0.394983	-0.469918	0.577058	-0.814333	0.415454	NA
hsa-miR-144-3p	3.57241	-0.289856	0.586869	-0.493902	0.621375	NA
hsa-miR-6760-5p	2.38783	-1.5326	0.62787	-2.44095	0.0146486	NA
hsa-miR-346	19.7266	-0.0204532	0.44767	-0.045688	0.963559	NA
hsa-miR-6879-3p	51.5218	1.16543	0.60154	1.93742	NA	NA
hsa-miR-3151-3p	1.34018	-0.392955	0.638436	-0.615497	0.538227	NA
hsa-miR-499b-5p	1.69877	-0.215422	0.648977	-0.33194	0.739934	NA
hsa-miR-4774-5p	2.62136	-0.273484	0.638625	-0.428239	0.668477	NA
hsa-miR-4685-5p	2.84615	-0.622083	0.630845	-0.986111	0.324079	NA
hsa-miR-6513-3p	0.589229	-0.315543	0.613854	-0.514035	0.607227	NA
hsa-miR-548t-3p	2.52934	-0.206226	0.60143	-0.342892	0.731679	NA
hsa-miR-514a-3p	3.30747	-0.179707	0.637592	-0.281852	0.778057	NA
hsa-miR-378b	1.42066	-0.298098	0.644321	-0.462654	0.643612	NA
hsa-miR-6860	2.66274	-0.243394	0.644872	-0.377429	0.705855	NA
hsa-miR-1278	1.67629	0.0643378	0.643135	0.100038	0.920314	NA
hsa-miR-601	3.08215	-1.05598	0.634709	-1.66372	0.0961678	NA
hsa-miR-4652-5p	2.55461	0.107427	0.637267	0.168575	0.866131	NA
hsa-miR-6502-3p	1.77801	-0.464283	0.648061	-0.716419	0.473733	NA
hsa-miR-5590-5p	9.2722	-0.279611	0.490526	-0.570021	0.568663	NA
hsa-miR-518e-3p	0.609884	0.288999	0.632408	0.456981	0.647684	NA
hsa-miR-8076	0.475238	-0.0465865	0.568718	-0.0819149	0.934714	NA
hsa-miR-548ad-3p	2.74876	-0.730558	0.623346	-1.172	0.241199	NA
hsa-miR-6083	3.28855	-0.543628	0.650091	-0.836233	0.403024	NA
hsa-miR-765	5.93797	-0.173524	0.510987	-0.339585	0.734169	NA
hsa-miR-4753-3p	5.60342	-0.838592	0.590901	-1.41918	0.155848	NA
hsa-miR-3164	4.7472	-0.726304	0.587821	-1.23559	0.216612	NA
hsa-miR-10b-3p	18.2899	-0.5756	0.640393	-0.898823	0.368747	NA
hsa-miR-6516-3p	13.3968	0.0395281	0.399821	0.0988644	0.921246	NA
hsa-miR-7111-5p	2.37853	0.0396506	0.643661	0.0616017	0.95088	NA
hsa-miR-3927-5p	1.2232	-0.188208	0.638379	-0.294822	0.76813	NA
hsa-miR-4718	6.17844	-1.38501	0.624661	-2.21722	0.0266083	NA
hsa-miR-4310	3.61124	-0.503454	0.601935	-0.836393	0.402934	NA
hsa-miR-5191	19.6527	-0.499326	0.435953	-1.14537	0.252057	NA
hsa-miR-3691-3p	4.27022	-0.541579	0.550112	-0.984489	0.324875	NA
hsa-miR-6826-5p	14.3771	-0.964927	0.509259	-1.89477	0.0581235	NA
hsa-miR-7845-5p	3.54553	-0.0390003	0.54648	-0.0713664	0.943106	NA
hsa-miR-518f-3p	0.159262	0.0512763	0.43192	0.118717	0.905499	NA
hsa-miR-2114-5p	11.3606	-0.0490827	0.515725	-0.0951724	0.924178	NA
hsa-miR-4700-5p	2.78491	-0.691521	0.644637	-1.07273	0.283392	NA
hsa-miR-4436b-5p	5.88022	-0.136178	0.54588	-0.249464	0.803002	NA
hsa-miR-3663-5p	1.49607	0.198455	0.650809	0.304936	0.760415	NA
hsa-miR-3682-3p	0.761884	-0.648827	0.638659	-1.01592	0.309667	NA
hsa-miR-4540	3.41585	-0.680349	0.602983	-1.12831	0.259191	NA
hsa-miR-155-3p	6.25608	-0.326336	0.609225	-0.535658	0.592195	NA
hsa-miR-3064-5p	7.65668	-0.327219	0.527441	-0.62039	0.535001	NA
hsa-miR-3136-5p	0.580179	0.316299	0.606464	0.521546	0.601987	NA
hsa-miR-7161-3p	3.69622	-0.954648	0.592723	-1.61062	0.107264	NA
hsa-miR-432-3p	11.903	0.0328677	0.489914	0.0670887	NA	NA
hsa-miR-4743-5p	1.51715	0.296383	0.650946	0.455311	0.648885	NA
hsa-miR-6501-5p	4.03143	-1.8083	0.57046	-3.16989	0.00152497	NA
hsa-miR-4789-3p	3.75919	0.286099	0.588108	0.486474	0.626631	NA
hsa-miR-564	7.66974	-0.54298	0.556122	-0.976369	0.328882	NA
hsa-miR-6794-5p	5.09352	0.000886919	0.490407	0.00180853	0.998557	NA
hsa-miR-8082	1.35768	-1.02179	0.65018	-1.57155	0.116056	NA
hsa-miR-606	17.1682	-1.33303	0.522474	-2.55138	0.0107298	NA
hsa-miR-620	0.434423	-0.0882782	0.565199	-0.15619	0.875884	NA
hsa-miR-218-1-3p	2.24865	0.198816	0.615632	0.322946	0.746736	NA
hsa-miR-378g	3.17671	-0.999727	0.602021	-1.66062	0.0967899	NA
hsa-miR-4676-5p	1.55389	-0.0328615	0.642119	-0.0511767	0.959185	NA
hsa-miR-3619-5p	2.03046	0.0635318	0.61248	0.103729	0.917385	NA
hsa-miR-6125	5.70617	0.235749	0.550085	0.428569	0.668237	NA
hsa-miR-1299	5.44659	-1.455	0.650475	-2.23682	NA	NA
hsa-miR-4648	10.6502	-0.291912	0.519168	-0.562269	0.573933	NA
hsa-miR-380-3p	100.535	-0.0917186	0.624963	-0.146758	NA	NA
hsa-miR-4794	1.70574	0.595875	0.648893	0.918295	0.358465	NA
hsa-miR-1260a	18.8612	0.0253266	0.420295	0.0602591	0.951949	NA
hsa-miR-3665	4.54579	-0.22879	0.583299	-0.392235	0.694885	NA
hsa-miR-1914-3p	10.0618	0.325962	0.425636	0.765823	0.443781	NA
hsa-miR-1244	1.86042	-1.11407	0.628844	-1.77162	0.0764576	NA
hsa-miR-6077	2.44016	-0.969166	0.633966	-1.52873	0.12633	NA
hsa-miR-4689	1.44857	-0.279512	0.650871	-0.429443	0.667601	NA
hsa-miR-875-3p	2.94211	-0.204392	0.573691	-0.356275	0.721635	NA
hsa-miR-4297	0.767523	-0.349526	0.641779	-0.54462	0.586015	NA
hsa-miR-6072	4.39575	-0.626199	0.608861	-1.02848	0.303726	NA
hsa-miR-4272	5.17091	-0.304338	0.567266	-0.5365	0.591613	NA
hsa-miR-933	6.48462	0.438275	0.521554	0.840326	0.400725	NA
hsa-miR-658	0.166018	0.0574489	0.441651	0.130078	0.896505	NA
hsa-miR-7106-3p	2.04624	-0.126545	0.620575	-0.203915	0.83842	NA
hsa-miR-580-3p	12.4307	0.384648	0.445156	0.864074	0.387547	NA
hsa-miR-4639-5p	5.67693	-0.856773	0.594622	-1.44087	0.149621	NA
hsa-miR-7847-3p	4.29268	-0.575353	0.54242	-1.06072	0.288819	NA
hsa-miR-3149	1.49257	0.124406	0.643246	0.193403	0.846643	NA
hsa-miR-3117-5p	1.35414	-0.727817	0.646356	-1.12603	0.260152	NA
hsa-miR-4276	3.41884	-0.606007	0.581938	-1.04136	0.297709	NA
hsa-miR-7703	1.8051	-1.30818	0.648277	-2.01793	0.0435985	NA
hsa-miR-491-3p	18.4562	0.157763	0.452496	0.348651	0.727351	NA
hsa-miR-596	4.41265	0.302981	0.549922	0.550952	0.581666	NA
hsa-miR-4477b	1.04715	0.192377	0.646655	0.297495	0.766089	NA
hsa-miR-6781-3p	13.1095	-0.659146	0.479405	-1.37492	0.169155	NA
hsa-miR-4424	10.231	-0.753055	0.422492	-1.78241	0.0746821	NA
hsa-miR-4260	5.91621	-0.362415	0.504528	-0.718325	0.472557	NA
hsa-miR-106a-3p	11.902	0.509271	0.470589	1.0822	0.279164	NA
hsa-miR-7973	3.02309	-0.743721	0.641164	-1.15995	0.246068	NA
hsa-miR-6828-5p	6.24747	-1.14494	0.501079	-2.28494	0.0223163	NA
hsa-miR-575	4.83617	-0.248154	0.613537	-0.404464	0.685871	NA
hsa-miR-381-3p	1805.87	-0.0708894	0.649874	-0.109082	NA	NA
hsa-miR-4735-5p	2.8986	0.51521	0.582983	0.883748	0.376832	NA
hsa-miR-6848-5p	9.86776	-0.137652	0.438084	-0.314214	0.753359	NA
hsa-miR-6833-3p	22.7832	-0.125628	0.476018	-0.263914	0.791846	NA
hsa-miR-6756-5p	3.41552	-0.991518	0.600019	-1.65248	0.0984374	NA
hsa-miR-1251-3p	24.3799	0.549754	0.408922	1.3444	0.17882	NA
hsa-miR-4672	6.11245	-1.30935	0.536332	-2.4413	0.0146346	NA
hsa-miR-3935	1.14255	0.451891	0.649946	0.695275	0.486883	NA
hsa-miR-4646-5p	2.044	-1.23271	0.635544	-1.93962	0.0524259	NA
hsa-miR-934	0.156252	-0.39204	0.433101	-0.905193	0.365363	NA
hsa-miR-1271-3p	4.93013	-0.184763	0.507131	-0.36433	0.715612	NA
hsa-miR-4419a	6.39336	-0.274057	0.51374	-0.533455	0.593718	NA
hsa-miR-302c-5p	1.95273	1.91844	0.649368	2.95432	0.00313361	NA
hsa-miR-6787-3p	6.47007	-0.855051	0.50741	-1.68513	0.091964	NA
hsa-miR-3145-5p	21.9933	0.0983181	0.484796	0.202803	0.839289	NA
hsa-miR-548y	8.12472	0.255129	0.574032	0.444452	0.656716	NA
hsa-miR-6515-5p	6.80964	0.451116	0.494734	0.911836	0.361855	NA
hsa-miR-4782-3p	2.1364	-1.40139	0.649079	-2.15905	0.0308465	NA
hsa-miR-7855-5p	0.6131	-0.768706	0.618513	-1.24283	0.213931	NA
hsa-miR-1205	6.05234	-0.664344	0.554153	-1.19885	0.230588	NA
hsa-miR-4445-5p	0.912111	-0.591187	0.628101	-0.94123	0.346587	NA
hsa-miR-4511	3.1021	0.234044	0.592408	0.395073	0.692789	NA
hsa-miR-3173-3p	2.52784	-0.0747538	0.609299	-0.122688	0.902354	NA
hsa-miR-5188	1.71495	-0.252912	0.630908	-0.40087	0.688516	NA
hsa-miR-7978	2.53433	-0.0189689	0.650407	-0.0291646	0.976733	NA
hsa-miR-5693	5.27453	-1.45843	0.556003	-2.62305	0.00871452	NA
hsa-miR-6749-5p	3.88054	-0.51571	0.556556	-0.926609	0.35413	NA
hsa-miR-4419b	5.00981	-0.488083	0.542054	-0.900434	0.36789	NA
hsa-miR-4727-5p	0.359978	-0.681017	0.525761	-1.2953	0.195217	NA
hsa-miR-6890-3p	4.56875	-0.397075	0.540048	-0.735259	0.462182	NA
hsa-miR-5707	1.96655	-0.718428	0.625728	-1.14815	0.250907	NA
hsa-miR-6090	4.08863	0.629729	0.561894	1.12073	0.262405	NA
hsa-miR-770-5p	26.036	-0.391006	0.600214	-0.651445	NA	NA
hsa-miR-3162-3p	4.34186	-0.308259	0.551465	-0.558982	0.576174	NA
hsa-miR-6503-5p	8.07258	-0.863838	0.553047	-1.56196	0.118297	NA
hsa-miR-4422	2.9442	-0.597599	0.579687	-1.0309	0.302588	NA
hsa-miR-4803	7.44869	-0.542422	0.54176	-1.00122	0.31672	NA
hsa-miR-593-5p	8.9227	0.262644	0.560453	0.468629	0.639335	NA
hsa-miR-3617-5p	3.26714	-1.51438	0.640071	-2.36595	0.0179837	NA
hsa-miR-141-5p	3.71902	-0.568358	0.59279	-0.958785	0.337667	NA
hsa-miR-4291	14.6915	0.173322	0.403948	0.429071	0.667872	NA
hsa-miR-3146	0.502522	-0.993786	0.593417	-1.67468	0.0939962	NA
hsa-miR-382-5p	126.71	-0.203771	0.65187	-0.312595	NA	NA
hsa-miR-4757-5p	4.45455	0.00988557	0.552553	0.0178907	0.985726	NA
hsa-miR-6073	2.17837	0.238549	0.612442	0.389504	0.696904	NA
hsa-miR-203a-3p	14.919	-1.17674	0.584375	-2.01367	0.0440443	NA
hsa-miR-4534	0.694548	-0.621625	0.598516	-1.03861	0.298986	NA
hsa-miR-518c-3p	0	NA	NA	NA	NA	NA
hsa-miR-376c-5p	1.09782	-0.809294	0.649449	-1.24612	0.212719	NA
hsa-let-7d-5p	917.21	1.17291	0.515827	2.27384	NA	NA
hsa-miR-6798-5p	19.9284	-1.43076	0.516302	-2.77117	0.00558545	NA
hsa-miR-649	3.09928	-1.54611	0.627032	-2.46577	0.013672	NA
hsa-miR-8087	3.99413	-1.77989	0.626965	-2.8389	0.00452698	NA
hsa-miR-548n	11.1819	0.41323	0.474891	0.870156	0.384215	NA
hsa-miR-4797-3p	3.67296	-0.165552	0.560388	-0.295423	0.767671	NA
hsa-miR-4742-5p	12.1094	0.287328	0.534439	0.537626	0.590835	NA
hsa-miR-483-5p	17.3478	0.754897	0.523031	1.44331	0.148933	NA
hsa-miR-410-5p	5.17886	-0.396853	0.603203	-0.65791	0.510596	NA
hsa-miR-520d-5p	3.4387	-1.3186	0.631654	-2.08753	0.0368399	NA
hsa-miR-497-3p	0	NA	NA	NA	NA	NA
hsa-miR-4482-3p	4.15317	1.19897	0.644222	1.86111	0.0627289	NA
hsa-miR-23b-5p	8.73894	-0.0202262	0.46878	-0.0431465	0.965585	NA
hsa-miR-4701-3p	4.87583	0.428521	0.536435	0.79883	0.424389	NA
hsa-miR-588	4.77181	0.482087	0.567936	0.848839	0.395971	NA
hsa-miR-6866-5p	21.8729	-0.238434	0.371348	-0.642077	0.520823	NA
hsa-miR-519c-5p	1.09617	-1.41848	0.650573	-2.18035	0.0292313	NA
hsa-miR-3973	3.44147	-0.999699	0.625798	-1.59748	0.110159	NA
hsa-miR-202-5p	0.674649	0.545267	0.641702	0.84972	0.395481	NA
hsa-miR-1270	21.9538	0.888956	0.614315	1.44707	0.147878	NA
hsa-miR-6509-5p	1.30289	-0.420338	0.643673	-0.65303	0.513737	NA
hsa-miR-4695-3p	2.79458	-0.610535	0.59313	-1.02934	0.303318	NA
hsa-miR-6731-3p	4.16625	-0.475428	0.598396	-0.794504	0.426902	NA
hsa-miR-4436a	4.26241	0.127046	0.558744	0.227377	0.820131	NA
hsa-miR-5194	6.54916	-0.466511	0.529034	-0.881817	0.377876	NA
hsa-miR-4694-3p	1.98618	-0.569035	0.649513	-0.876095	0.380978	NA
hsa-miR-6870-5p	3.59844	0.556093	0.578818	0.960739	0.336684	NA
hsa-miR-647	2.15543	-1.03867	0.649702	-1.59869	0.109889	NA
hsa-miR-892a	10.0558	-0.594842	0.510789	-1.16456	0.244199	NA
hsa-miR-3945	2.27014	-0.804486	0.620682	-1.29613	0.19493	NA
hsa-miR-6831-5p	1.09934	-1.33544	0.650383	-2.05331	0.0400422	NA
hsa-miR-518d-3p	2.77711	-0.283391	0.605728	-0.467853	0.63989	NA
hsa-miR-377-3p	42.5538	0.0222354	0.651227	0.0341438	NA	NA
hsa-miR-3911	2.79213	-0.193501	0.631589	-0.306371	0.759322	NA
hsa-miR-23a-5p	27.0563	1.30111	0.471106	2.76181	0.00574813	NA
hsa-miR-1294	6.59873	0.627097	0.511043	1.22709	0.219788	NA
hsa-miR-3943	22.4856	0.156249	0.401525	0.389139	0.697173	NA
hsa-miR-2278	4.02474	0.0691019	0.548542	0.125974	0.899753	NA
hsa-miR-4522	4.15071	-0.0642713	0.556356	-0.115522	0.908032	NA
hsa-miR-1295b-3p	0.666232	-1.2547	0.622555	-2.0154	0.0438631	NA
hsa-miR-3927-3p	0.0660678	-0.210799	0.384096	-0.548819	0.58313	NA
hsa-miR-4685-3p	5.49838	-0.761285	0.503214	-1.51284	0.130319	NA
hsa-miR-4515	5.56058	-0.109043	0.504661	-0.216072	0.828932	NA
hsa-miR-136-5p	20.3399	0.142804	0.651861	0.219071	NA	NA
hsa-miR-3136-3p	12.9192	0.302327	0.403126	0.749957	0.45328	NA
hsa-miR-5003-5p	3.05271	-0.11612	0.640176	-0.181388	0.856063	NA
hsa-miR-4709-5p	9.781	-0.947842	0.547314	-1.73181	0.083308	NA
hsa-miR-7108-3p	26.985	-0.144023	0.409608	-0.351613	0.725129	NA
hsa-miR-3152-5p	15.1844	0.34957	0.528875	0.660968	0.508633	NA
hsa-miR-1197	237.817	-0.10362	0.651299	-0.159097	NA	NA
hsa-miR-548f-3p	17.5359	0.476325	0.429762	1.10835	0.267713	NA
hsa-miR-4749-3p	15.8427	-0.0996041	0.407968	-0.244147	0.807117	NA
hsa-miR-4636	11.9764	-0.331541	0.46955	-0.706083	0.480137	NA
hsa-miR-3649	0.541902	-1.13851	0.610375	-1.86526	0.0621444	NA
hsa-miR-6859-5p	12.5202	-0.0465377	0.452468	-0.102853	0.91808	NA
hsa-miR-520g-5p	3.4528	-0.20724	0.649529	-0.319062	0.749679	NA
hsa-miR-200b-5p	0	NA	NA	NA	NA	NA
hsa-miR-422a	1.27039	-0.0648858	0.649353	-0.0999238	0.920405	NA
hsa-miR-6834-5p	1.05597	-0.684291	0.639516	-1.07001	0.284613	NA
hsa-miR-4713-5p	5.85084	-0.492272	0.494439	-0.995616	0.319437	NA
hsa-miR-6894-3p	11.8268	0.556256	0.436682	1.27383	0.202725	NA
hsa-miR-4659a-5p	0.576408	-0.275768	0.605427	-0.455494	0.648754	NA
hsa-miR-4765	1.2373	-0.178237	0.65	-0.274211	0.783923	NA
hsa-miR-2467-3p	3.98488	-0.458862	0.564623	-0.812686	0.416398	NA
hsa-miR-3186-3p	26.6403	0.240681	0.48628	0.494944	0.62064	NA
hsa-miR-5587-5p	7.10859	0.825272	0.509727	1.61905	0.105438	NA
hsa-miR-5584-3p	5.43996	-0.76967	0.568593	-1.35364	0.175852	NA
hsa-miR-4781-3p	21.6568	-0.440941	0.408209	-1.08019	0.28006	NA
hsa-miR-2909	6.3971	-1.25827	0.559939	-2.24716	0.0246298	NA
hsa-miR-4495	8.43188	-0.354604	0.57628	-0.615333	0.538335	NA
hsa-miR-6758-3p	10.9263	-0.66177	0.421763	-1.56906	0.116635	NA
hsa-miR-8068	4.3421	-0.325685	0.580406	-0.561133	0.574707	NA
hsa-miR-6080	1.6627	0.727509	0.648433	1.12195	0.261884	NA
[truncated: 566 more rows]
