# Supplementary material for: Sporadic Parkinson’s disease derived neuronal cells show disease-specific mRNA and small RNA signatures with abundant deregulation of piRNAs
Source: Acta Neuropathol Commun. 2018 Jul 10;6:58. doi: 10.1186/s40478-018-0561-x (PMC6038190; doi:10.1186/s40478-018-0561-x)
Supplement: Supplementary file 8 — Table S5. Differential expression analysis for piRNAs/piRNA-like molecules in fibroblasts, iPSCs/ESCs and neurons for the comparison PD vs. CTRL. (XLSX 10389 kb) [file 40478_2018_561_MOESM8_ESM.xlsx]

## Sheet: fibroblasts
piRNA name (RNAdb2.0)	piRNA ID (Genomatix)	piRNA name (piRBase)	baseMean	log2FoldChange	lfcSE	stat	pvalue	padj
piR-31058	GXN_540638	piR-hsa-1197	77.2012	-4.74888	0.739133	-6.42494	1.31923e-10	2.04745e-07
piR-38505	GXN_572711	piR-hsa-30639	1874.73	-5.45883	0.848137	-6.43626	1.22453e-10	2.04745e-07
piR-52342	GXN_556232	piR-hsa-15541	410.534	-5.09587	0.827782	-6.15605	7.45805e-10	7.7166e-07
piR-59410	GXN_563880	piR-hsa-22532	30272.9	-5.25412	0.873774	-6.01314	1.81968e-09	1.41207e-06
piR-60159	GXN_565787	piR-hsa-24281	44517.8	-5.06149	0.87492	-5.78509	7.24733e-09	4.49914e-06
piR-48298	GXN_550677	piR-hsa-10426	44502.2	-4.98744	0.876969	-5.68713	1.29193e-08	6.68356e-06
piR-55780	GXN_559976	piR-hsa-18965	19.9865	-4.09311	0.756318	-5.4119	6.23608e-08	2.76526e-05
piR-47210	GXN_549572	piR-hsa-9410	447.688	-3.49185	0.64954	-5.37589	7.6207e-08	2.95683e-05
piR-36784	GXN_570853	piR-hsa-28918	66.4875	-4.19501	0.818964	-5.12234	3.01772e-07	0.000104078
piR-54555	GXN_558615	piR-hsa-17733	6224.12	-4.43984	0.882129	-5.03309	4.82633e-07	0.000149809
piR-35832	GXN_569851	piR-hsa-27996	393.417	-4.18494	0.844362	-4.95634	7.18349e-07	0.000202705
piR-48172	GXN_550539	piR-hsa-10300	23.918	-3.94209	0.806121	-4.89019	1.00736e-06	0.000240528
piR-38672	GXN_572889	piR-hsa-30806	39.5872	3.68023	0.751451	4.8975	9.70639e-07	0.000240528
piR-47866	GXN_550221	piR-hsa-10009	29.3728	-3.81969	0.810229	-4.71434	2.425e-06	0.000537657
piR-45134	GXN_547314	piR-hsa-7341	43.6987	-3.59045	0.773699	-4.64063	3.4735e-06	0.000718784
piR-45867	GXN_548054	piR-hsa-8014	59.6683	-3.53964	0.793611	-4.46017	8.18963e-06	0.00158879
piR-45142	GXN_547323	piR-hsa-7349	70.0837	3.12023	0.70423	4.4307	9.39264e-06	0.00165977
piR-52451	GXN_556350	piR-hsa-15650	63.1242	3.29156	0.745753	4.41375	1.01597e-05	0.00165977
piR-38324	GXN_572517	piR-hsa-30458	39.8053	-3.67091	0.831114	-4.41685	1.00148e-05	0.00165977
piR-39952	GXN_574324	piR-hsa-32109	2336.65	3.73081	0.847849	4.40032	1.0809e-05	0.00167755
piR-52574	GXN_556466	piR-hsa-15758	69.9119	-3.52233	0.806975	-4.36485	1.27209e-05	0.00188028
piR-32789	GXN_553472	piR-hsa-13000	22.2038	-3.45208	0.798113	-4.3253	1.52323e-05	0.00214914
piR-57866	GXN_562260	piR-hsa-21050	440.08	3.37164	0.786619	4.28625	1.81718e-05	0.00235022
piR-34416	GXN_568287	piR-hsa-26566	24.8094	-3.23402	0.753943	-4.28947	1.791e-05	0.00235022
piR-32632	GXN_553190	piR-hsa-12743	112.311	3.56969	0.835606	4.27197	1.93751e-05	0.00240562
piR-50008	GXN_552529	piR-hsa-12135	5021.35	-3.76459	0.88486	-4.25445	2.09568e-05	0.00248602
piR-61031	GXN_566802	piR-hsa-25210	1215.86	-3.17944	0.748558	-4.24742	2.16245e-05	0.00248602
piR-58047	GXN_562441	piR-hsa-21214	15272.5	3.49252	0.837681	4.16928	3.0557e-05	0.00338746
piR-39456	GXN_573836	piR-hsa-31660	39.1057	-3.25821	0.786906	-4.14053	3.46509e-05	0.00370884
piR-37941	GXN_572135	piR-hsa-30103	181.493	3.02339	0.734952	4.11372	3.89331e-05	0.00402828
piR-39588	GXN_573948	piR-hsa-31762	20.6773	-3.35075	0.823286	-4.06997	4.70192e-05	0.00470799
piR-37300	GXN_571490	piR-hsa-29505	42815.6	3.32844	0.825803	4.03055	5.56459e-05	0.00539765
piR-59965	GXN_564562	piR-hsa-23160	72.2406	-3.1669	0.787709	-4.02039	5.81017e-05	0.00546508
piR-40257	GXN_541936	piR-hsa-2396	1349.27	3.12254	0.77817	4.01267	6.00361e-05	0.00548094
piR-31682	GXN_541392	piR-hsa-1893	271.265	3.03988	0.760491	3.99726	6.40787e-05	0.00552501
piR-57103	GXN_561384	piR-hsa-20244	419.835	2.92705	0.732183	3.9977	6.39611e-05	0.00552501
piR-48841	GXN_551259	piR-hsa-10955	23322.9	3.48066	0.873807	3.98332	6.79578e-05	0.00570111
piR-60948	GXN_566726	piR-hsa-25142	58.2723	-1.80176	0.459247	-3.92328	8.73521e-05	0.00713528
piR-41218	GXN_542458	piR-hsa-2877	32381.1	-3.4261	0.883502	-3.87787	0.000105377	0.00817724
piR-37712	GXN_571104	piR-hsa-29147	96.6975	2.56032	0.660075	3.87882	0.000104963	0.00817724
piR-57850	GXN_562242	piR-hsa-21034	47.4726	3.25398	0.840618	3.87093	0.000108419	0.00820811
piR-44901	GXN_547077	piR-hsa-7125	26.9221	-3.19303	0.827201	-3.86004	0.00011337	0.00837861
piR-35668	GXN_569688	piR-hsa-27847	1520.95	2.34233	0.608473	3.84953	0.000118345	0.00854287
piR-45410	GXN_547584	piR-hsa-7588	211.911	2.82697	0.737618	3.83257	0.000126814	0.00874733
piR-32239	GXN_551512	piR-hsa-11191	39.0263	-1.61952	0.42241	-3.834	0.000126077	0.00874733
piR-60904	GXN_566679	piR-hsa-25098	117.648	2.59296	0.680859	3.80837	0.000139883	0.00923824
piR-35096	GXN_569113	piR-hsa-27320	43.3779	2.80622	0.736737	3.80898	0.000139541	0.00923824
piR-44560	GXN_546606	piR-hsa-6696	37.4143	-2.63899	0.694855	-3.7979	0.000145929	0.00943672
piR-47819	GXN_550169	piR-hsa-9962	23.7435	-2.61623	0.691581	-3.78297	0.000154965	0.00981658
piR-30091	GXN_539672	piR-hsa-303	3511.92	2.90657	0.772392	3.76308	0.000167835	0.0102149
piR-31629	GXN_541337	piR-hsa-1840	1557.8	2.63303	0.698889	3.76745	0.000164922	0.0102149
piR-58068	GXN_562464	piR-hsa-21235	46.3613	-3.29002	0.881585	-3.73194	0.000190013	0.0113423
piR-42825	GXN_544822	piR-hsa-5048	1319.38	-1.95191	0.52502	-3.71778	0.000200982	0.0117707
piR-46166	GXN_548381	piR-hsa-8313	142.252	2.79244	0.758133	3.6833	0.00023023	0.0132339
piR-45397	GXN_547570	piR-hsa-7575	58697.1	-3.24477	0.884529	-3.66835	0.000244118	0.0137771
piR-44981	GXN_547148	piR-hsa-7190	6446.66	2.74774	0.750603	3.66071	0.000251515	0.0139411
piR-42811	GXN_544807	piR-hsa-5034	1294.6	-2.10011	0.576404	-3.64346	0.000268995	0.0146484
piR-37663	GXN_571867	piR-hsa-29854	30.6335	2.7369	0.754506	3.62741	0.000286275	0.0153207
piR-37623	GXN_571824	piR-hsa-29814	17.5233	1.42035	0.393376	3.61068	0.0003054	0.0160671
piR-30680	GXN_540261	piR-hsa-848	85.4082	2.31016	0.641907	3.5989	0.000319565	0.0162558
piR-43960	GXN_545987	piR-hsa-6126	9291.76	2.57567	0.716332	3.59564	0.000323599	0.0162558
piR-34019	GXN_565636	piR-hsa-24141	39.9992	-2.97016	0.826248	-3.59475	0.000324697	0.0162558
piR-43326	GXN_545313	piR-hsa-5506	80.6355	1.96531	0.553271	3.55217	0.000382072	0.0188246
piR-42809	GXN_544804	piR-hsa-5032	876.406	-2.13303	0.601478	-3.54631	0.000390672	0.0188711
piR-51156	GXN_554864	piR-hsa-14280	528.995	-2.57107	0.725619	-3.54329	0.000395175	0.0188711
piR-37979	GXN_571141	piR-hsa-29181	53.7585	1.29571	0.366106	3.53918	0.000401373	0.0188767
piR-47537	GXN_549877	piR-hsa-9694	51.1429	2.31287	0.654563	3.53345	0.000410171	0.0190025
piR-30136	GXN_539719	piR-hsa-348	45.2776	-2.62125	0.746359	-3.51204	0.000444677	0.0197182
piR-49704	GXN_552246	piR-hsa-11876	48.1098	-3.10742	0.884705	-3.51237	0.000444122	0.0197182
piR-54782	GXN_558848	piR-hsa-17946	19.5825	2.25763	0.641491	3.51934	0.000432614	0.0197182
piR-48442	GXN_550836	piR-hsa-10570	19.5377	-2.86922	0.819751	-3.50011	0.00046507	0.0203321
piR-43695	GXN_545698	piR-hsa-5861	43.7911	2.547	0.730375	3.48725	0.000488013	0.0210388
piR-34532	GXN_568412	piR-hsa-26682	44.2933	2.27876	0.660295	3.45113	0.000558248	0.023737
piR-31469	GXN_541162	piR-hsa-1680	178.093	2.65978	0.773562	3.43836	0.000585259	0.0245492
piR-48959	GXN_551385	piR-hsa-11073	195.91	2.60952	0.760775	3.43008	0.000603394	0.0249725
piR-54290	GXN_558327	piR-hsa-17469	471.988	2.43835	0.71277	3.42094	0.000624041	0.0254871
piR-39240	GXN_573602	piR-hsa-31444	81.6202	2.47319	0.725226	3.41023	0.000649084	0.0261657
piR-34981	GXN_568986	piR-hsa-27205	24.5411	-2.83729	0.836586	-3.3915	0.000695099	0.0269698
piR-35325	GXN_569348	piR-hsa-27534	855.966	2.63048	0.775244	3.3931	0.000691059	0.0269698
piR-39288	GXN_573654	piR-hsa-31492	156.515	-2.74306	0.808151	-3.39424	0.000688201	0.0269698
piR-57236	GXN_559659	piR-hsa-18679	425.741	2.19316	0.64777	3.38571	0.000709947	0.0272059
piR-53998	GXN_558026	piR-hsa-17192	77.4351	2.55369	0.755556	3.37988	0.000725178	0.0274507
piR-35529	GXN_569537	piR-hsa-27709	32.3986	2.44174	0.725647	3.36492	0.000765662	0.0286339
piR-37364	GXN_571559	piR-hsa-29569	28.1681	-2.39795	0.713795	-3.35943	0.000781022	0.0288606
piR-31686	GXN_540796	piR-hsa-1344	1532.38	2.71963	0.813501	3.34312	0.000828425	0.0299004
piR-43165	GXN_545155	piR-hsa-5359	246.618	2.37374	0.709516	3.34558	0.000821114	0.0299004
piR-40596	GXN_542288	piR-hsa-2720	50.1912	2.32271	0.69712	3.33186	0.000862668	0.0304709
piR-35196	GXN_569222	piR-hsa-27420	31.114	1.8383	0.551798	3.33148	0.000863864	0.0304709
piR-57172	GXN_561459	piR-hsa-20313	23.576	2.25006	0.677339	3.32192	0.000894013	0.03118
piR-41167	GXN_542990	piR-hsa-3363	2247.62	2.92465	0.881783	3.31675	0.000910711	0.0314094
piR-37804	GXN_571989	piR-hsa-29966	439.966	2.09344	0.632758	3.30844	0.000938187	0.0320015
piR-42243	GXN_544111	piR-hsa-4393	2902.14	2.90739	0.882225	3.29552	0.0009824	0.0327889
piR-33843	GXN_565459	piR-hsa-23979	33.0888	1.72904	0.524598	3.29593	0.000980952	0.0327889
piR-39642	GXN_574004	piR-hsa-31816	50.9413	2.3206	0.705321	3.29014	0.00100138	0.033067
piR-31156	GXN_540744	piR-hsa-1295	145.639	2.68996	0.821698	3.27365	0.00106167	0.033287
piR-40233	GXN_541911	piR-hsa-2372	23.7752	-2.12422	0.647325	-3.28153	0.00103245	0.033287
piR-43806	GXN_545820	piR-hsa-5972	149.389	2.63349	0.803956	3.27567	0.00105413	0.033287
piR-34508	GXN_568386	piR-hsa-26658	68.2701	-2.9026	0.884492	-3.28165	0.001032	0.033287
piR-38159	GXN_572354	piR-hsa-30307	55.6474	1.99569	0.609364	3.27504	0.00105648	0.033287
piR-41829	GXN_543678	piR-hsa-3996	31.7732	-1.33911	0.412681	-3.24489	0.00117494	0.0348406
piR-46437	GXN_548662	piR-hsa-8566	52.536	-2.1642	0.666103	-3.24904	0.00115794	0.0348406
piR-53868	GXN_557885	piR-hsa-17062	65.0499	-1.02708	0.315864	-3.25164	0.00114741	0.0348406
piR-58365	GXN_562774	piR-hsa-21518	16735.2	-2.59616	0.800293	-3.24402	0.00117857	0.0348406
piR-61511	GXN_566469	piR-hsa-24906	34.4212	1.91987	0.591315	3.24678	0.00116719	0.0348406
piR-39280	GXN_573645	piR-hsa-31484	64.4486	-2.62592	0.80851	-3.24785	0.00116279	0.0348406
piR-43744	GXN_545752	piR-hsa-5910	26.777	-1.89136	0.583834	-3.23954	0.00119721	0.0350579
piR-42944	GXN_544950	piR-hsa-5167	1066.61	-1.78966	0.554345	-3.22842	0.00124474	0.0350821
piR-42945	GXN_544951	piR-hsa-5168	1068.45	-1.78903	0.553618	-3.23152	0.00123134	0.0350821
piR-47861	GXN_550216	piR-hsa-10004	268.959	2.54394	0.788252	3.22732	0.00124958	0.0350821
piR-35051	GXN_569063	piR-hsa-27275	16.3298	-2.52344	0.780859	-3.23162	0.00123089	0.0350821
piR-39109	GXN_573475	piR-hsa-31328	18.0061	-1.58334	0.490778	-3.22618	0.00125455	0.0350821
piR-51701	GXN_555552	piR-hsa-14914	61.1524	-2.39518	0.746718	-3.20761	0.00133844	0.036443
piR-55200	GXN_559275	piR-hsa-18335	19.2308	-2.31277	0.720498	-3.20996	0.00132755	0.036443
piR-60625	GXN_566280	piR-hsa-24732	54.0544	1.41123	0.439767	3.20905	0.00133176	0.036443
piR-55905	GXN_560114	piR-hsa-19090	18.1771	1.21073	0.378104	3.20211	0.00136425	0.0365054
piR-58042	GXN_562436	piR-hsa-21209	18.92	-2.09494	0.653752	-3.20448	0.00135305	0.0365054
piR-47780	GXN_550126	piR-hsa-9923	18.2141	2.57902	0.811661	3.17746	0.00148573	0.0394163
piR-50893	GXN_554608	piR-hsa-14047	86.9429	1.3199	0.418905	3.15085	0.00162798	0.0428241
piR-54160	GXN_558203	piR-hsa-17354	72.6886	2.09302	0.665335	3.14582	0.00165625	0.0432016
piR-42753	GXN_544744	piR-hsa-4976	30.2183	1.94359	0.618766	3.14108	0.00168328	0.0435409
piR-60623	GXN_566278	piR-hsa-24730	559.178	2.6035	0.829895	3.13714	0.00170602	0.0437644
piR-48796	GXN_551209	piR-hsa-10910	20.7328	-1.23655	0.395674	-3.12518	0.00177699	0.0450177
piR-58643	GXN_563078	piR-hsa-21795	49.1479	2.56797	0.822003	3.12404	0.00178389	0.0450177
piR-39608	GXN_573968	piR-hsa-31782	82.7011	1.97679	0.633377	3.12103	0.00180222	0.0451137
piR-43691	GXN_545694	piR-hsa-5857	500.893	1.96188	0.631053	3.10889	0.00187789	0.0465021
piR-59030	GXN_563481	piR-hsa-22166	17.9959	-1.39147	0.447798	-3.10736	0.00188765	0.0465021
piR-44821	GXN_546989	piR-hsa-7045	71.9738	2.08217	0.671171	3.10229	0.0019203	0.0465672
piR-45302	GXN_547466	piR-hsa-7480	323.974	2.36812	0.763299	3.10248	0.00191909	0.0465672
piR-42894	GXN_544895	piR-hsa-5117	863.798	2.15631	0.696444	3.09617	0.00196037	0.0468076
piR-61854	GXN_567635	piR-hsa-25974	138.591	-2.24183	0.723799	-3.09731	0.00195288	0.0468076
piR-31029	GXN_540607	piR-hsa-1168	28.6754	-1.73703	0.562885	-3.08594	0.0020291	0.0470025
piR-48225	GXN_550597	piR-hsa-10353	30.2126	-2.01939	0.654292	-3.08637	0.00202619	0.0470025
piR-50744	GXN_554444	piR-hsa-13898	20.6679	1.6595	0.537207	3.08913	0.00200745	0.0470025
piR-34039	GXN_567889	piR-hsa-26205	53.6862	-1.25499	0.406174	-3.0898	0.00200294	0.0470025
piR-41200	GXN_543025	piR-hsa-3396	28.3757	-2.72022	0.883417	-3.07921	0.00207553	0.0475213
piR-61083	GXN_566858	piR-hsa-25262	68.5271	2.06907	0.672154	3.07826	0.00208212	0.0475213
piR-32904	GXN_553598	piR-hsa-13115	31.3371	2.45195	0.79797	3.07273	0.0021211	0.0479581
piR-55025	GXN_559083	piR-hsa-18160	2175.45	2.35226	0.765916	3.07118	0.00213216	0.0479581
piR-50185	GXN_553903	piR-hsa-13396	29.4291	2.61118	0.851762	3.06563	0.00217214	0.048506
piR-59730	GXN_564194	piR-hsa-22823	31.2209	1.35537	0.442718	3.06146	0.00220259	0.0488345
piR-44908	GXN_547084	piR-hsa-7132	2449.3	2.51565	0.826031	3.04546	0.00232322	0.0507637
piR-49146	GXN_551693	piR-hsa-11363	153.357	2.66727	0.876391	3.04347	0.00233866	0.0507637
piR-49916	GXN_552446	piR-hsa-12058	18.7931	-2.32125	0.762383	-3.04473	0.00232889	0.0507637
piR-47003	GXN_549351	piR-hsa-9204	336.306	1.78121	0.586188	3.03863	0.00237654	0.0508744
piR-62018	GXN_567815	piR-hsa-26138	31.6621	1.66634	0.548131	3.04003	0.00236553	0.0508744
piR-57924	GXN_562323	piR-hsa-21108	194.501	2.64765	0.872233	3.03549	0.00240145	0.0510556
piR-30175	GXN_539432	piR-hsa-152	105.642	2.33819	0.771446	3.03092	0.00243808	0.0514817
piR-48252	GXN_550627	piR-hsa-10380	41.6695	2.32477	0.768993	3.02313	0.00250173	0.0524241
piR-50808	GXN_554514	piR-hsa-13962	80.6549	2.43804	0.808555	3.01531	0.00256716	0.0524241
piR-51821	GXN_555684	piR-hsa-15034	481.633	2.1436	0.710478	3.01712	0.00255189	0.0524241
piR-59935	GXN_564529	piR-hsa-23130	20.2546	1.75543	0.581824	3.01711	0.00255201	0.0524241
piR-36111	GXN_570139	piR-hsa-28260	41.672	2.08158	0.689828	3.01753	0.00254845	0.0524241
piR-33637	GXN_565233	piR-hsa-23773	1925.26	2.41778	0.802456	3.01297	0.00258701	0.0524842
piR-36253	GXN_570293	piR-hsa-28402	97.379	-1.2713	0.423359	-3.00288	0.00267437	0.0539041
piR-44031	GXN_546049	piR-hsa-6182	37.6642	2.35683	0.786356	2.99715	0.00272513	0.054573
piR-44766	GXN_546928	piR-hsa-6990	167.462	2.33154	0.781488	2.98346	0.00285014	0.0562171
piR-57062	GXN_561339	piR-hsa-20203	103.948	1.97569	0.66261	2.98168	0.00286674	0.0562171
piR-59804	GXN_564385	piR-hsa-22999	69.1705	1.81496	0.608546	2.98246	0.00285946	0.0562171
piR-35174	GXN_569197	piR-hsa-27398	312.142	-1.92306	0.645258	-2.9803	0.00287968	0.0562171
piR-55240	GXN_557479	piR-hsa-16690	51.1955	2.0386	0.684742	2.97719	0.00290908	0.0564362
piR-44757	GXN_546918	piR-hsa-6981	42.3338	1.64574	0.553862	2.97139	0.00296453	0.0564542
piR-54653	GXN_558723	piR-hsa-17831	108.17	-1.84604	0.620594	-2.97464	0.00293332	0.0564542
piR-35175	GXN_569199	piR-hsa-27399	312.085	-1.91237	0.643644	-2.97116	0.00296673	0.0564542
piR-36323	GXN_570369	piR-hsa-28472	18.4223	1.704	0.573831	2.96951	0.00298276	0.0564542
piR-51887	GXN_555755	piR-hsa-15100	27.1829	-1.28814	0.434253	-2.96634	0.00301364	0.056693
piR-57390	GXN_561662	piR-hsa-20502	29598.7	2.61923	0.884807	2.96023	0.0030741	0.0570046
piR-58369	GXN_562778	piR-hsa-21522	17.8571	-1.34282	0.4539	-2.95841	0.00309234	0.0570046
piR-37166	GXN_571380	piR-hsa-29400	99.9083	2.5234	0.853283	2.95728	0.00310366	0.0570046
piR-37503	GXN_571694	piR-hsa-29694	96.6695	2.0136	0.680583	2.95864	0.00308996	0.0570046
piR-43518	GXN_545504	piR-hsa-5684	165.327	-1.52333	0.51606	-2.95184	0.00315882	0.057339
piR-32461	GXN_553003	piR-hsa-12572	61.2668	1.74282	0.590257	2.95264	0.00315068	0.057339
piR-38192	GXN_572390	piR-hsa-30340	38.201	2.1277	0.721583	2.94865	0.00319161	0.0575974
piR-38678	GXN_572896	piR-hsa-30812	225.223	-1.38474	0.470195	-2.94504	0.0032291	0.0579372
piR-32216	GXN_552752	piR-hsa-12342	36.7415	2.46148	0.836688	2.94193	0.0032617	0.0581857
piR-40121	GXN_541821	piR-hsa-2289	16.2914	1.62329	0.555341	2.92305	0.00346625	0.0611737
piR-40555	GXN_542245	piR-hsa-2679	71.2354	1.93007	0.661139	2.91931	0.00350803	0.0611737
piR-42353	GXN_544232	piR-hsa-4503	311.779	2.55408	0.874417	2.92089	0.0034903	0.0611737
piR-56075	GXN_560285	piR-hsa-19245	62.0979	1.1904	0.407495	2.92125	0.00348625	0.0611737
piR-34156	GXN_568018	piR-hsa-26322	31.3408	1.70132	0.584012	2.91317	0.00357784	0.0620426
piR-51541	GXN_555379	piR-hsa-14754	197.226	1.74075	0.598522	2.90842	0.00363258	0.0626419
piR-50836	GXN_554545	piR-hsa-13990	45.6326	-1.45009	0.500408	-2.89782	0.00375764	0.0644403
piR-33505	GXN_564277	piR-hsa-22900	50.4905	1.78281	0.616035	2.89401	0.00380352	0.0648688
piR-42064	GXN_543933	piR-hsa-4229	26.373	-1.94919	0.67419	-2.89116	0.00383826	0.0651036
piR-49657	GXN_552198	piR-hsa-11829	166.665	-1.0186	0.353727	-2.87961	0.00398171	0.0671697
piR-43997	GXN_546012	piR-hsa-6148	1026.08	-1.20395	0.418726	-2.87528	0.00403673	0.0677298
piR-32003	GXN_541694	piR-hsa-2171	31.4026	-1.58043	0.551159	-2.86747	0.00413771	0.0679547
piR-43323	GXN_545310	piR-hsa-5503	2319.51	2.34184	0.815899	2.87025	0.00410145	0.0679547
piR-32676	GXN_553238	piR-hsa-12787	34.125	-1.27354	0.443796	-2.86965	0.00410922	0.0679547
piR-55162	GXN_559234	piR-hsa-18297	22.3866	1.71361	0.597308	2.86889	0.00411915	0.0679547
piR-31361	GXN_541063	piR-hsa-1586	16.5207	2.0366	0.711015	2.86436	0.00417855	0.0682643
piR-47896	GXN_550254	piR-hsa-10039	109.421	-1.54734	0.540775	-2.86134	0.00421856	0.0685571
piR-39980	GXN_573030	piR-hsa-30937	343.131	1.2967	0.453822	2.85728	0.00427291	0.0690787
piR-38943	GXN_573294	piR-hsa-31163	108.655	2.16496	0.758235	2.85526	0.00430013	0.0691586
piR-44951	GXN_547132	piR-hsa-7175	1110.05	2.06093	0.722835	2.85117	0.00435588	0.069694
piR-35212	GXN_568888	piR-hsa-27115	539.193	2.51489	0.883406	2.84681	0.00441601	0.0702938
piR-33728	GXN_565332	piR-hsa-23864	160.975	2.20383	0.775244	2.84275	0.00447255	0.0708306
piR-37379	GXN_571575	piR-hsa-29584	19.7947	-1.53036	0.53954	-2.83642	0.00456228	0.0718849
piR-40558	GXN_542248	piR-hsa-2682	19.5387	2.39185	0.844311	2.8329	0.00461278	0.0723135
piR-47583	GXN_549926	piR-hsa-9740	27.7648	-2.25004	0.795528	-2.82836	0.00467877	0.0729794
piR-37926	GXN_572119	piR-hsa-30088	62.9043	1.01181	0.358106	2.82546	0.00472132	0.0732749
piR-57712	GXN_561997	piR-hsa-20809	24.3844	1.84434	0.654029	2.81997	0.00480285	0.0741694
piR-45537	GXN_547708	piR-hsa-7700	30.968	-1.04315	0.370409	-2.81621	0.00485935	0.0743025
piR-39268	GXN_573633	piR-hsa-31472	135.901	1.82693	0.648495	2.81719	0.00484461	0.0743025
piR-45652	GXN_547835	piR-hsa-7814	66.1402	1.72881	0.614512	2.81331	0.00490351	0.0746102
piR-43194	GXN_545187	piR-hsa-5388	33.427	-1.9267	0.685511	-2.8106	0.00494487	0.0748726
piR-42929	GXN_544933	piR-hsa-5152	29.7845	-1.03649	0.369087	-2.80825	0.00498112	0.0750553
piR-49040	GXN_551583	piR-hsa-11257	115.192	-1.95802	0.698486	-2.80324	0.00505921	0.0758637
piR-42907	GXN_544909	piR-hsa-5130	32.4395	1.80916	0.646795	2.79711	0.00515615	0.0765774
piR-38401	GXN_572600	piR-hsa-30535	316.892	2.46999	0.882804	2.79789	0.00514372	0.0765774
piR-35707	GXN_569730	piR-hsa-27886	658.008	1.7169	0.614586	2.79359	0.00521261	0.0770474
piR-52004	GXN_555867	piR-hsa-15203	17.0479	1.87881	0.675793	2.78016	0.00543325	0.079551
piR-52905	GXN_556788	piR-hsa-16058	60.0551	-1.58305	0.56917	-2.78133	0.00541359	0.079551
piR-37211	GXN_571066	piR-hsa-29112	16.509	2.02184	0.728535	2.77521	0.00551664	0.0803927
piR-40986	GXN_542791	piR-hsa-3182	23.192	1.75543	0.634318	2.76743	0.00564997	0.0810995
piR-44034	GXN_546052	piR-hsa-6185	20.227	2.21724	0.801001	2.76808	0.00563871	0.0810995
piR-45711	GXN_547900	piR-hsa-7873	23.5451	1.50986	0.545313	2.76879	0.00562643	0.0810995
piR-48081	GXN_550439	piR-hsa-10209	103.319	-1.57656	0.569918	-2.7663	0.00566965	0.0810995
piR-51923	GXN_555794	piR-hsa-15136	57.2659	1.66633	0.603817	2.75966	0.00578609	0.0823854
piR-40395	GXN_542087	piR-hsa-2534	1261.16	2.21903	0.805948	2.75332	0.00589938	0.0824892
piR-43190	GXN_545182	piR-hsa-5384	16195.2	2.42913	0.884605	2.74601	0.00603256	0.0824892
piR-45165	GXN_547347	piR-hsa-7372	305.118	-1.22998	0.446109	-2.75713	0.00583111	0.0824892
piR-32793	GXN_553477	piR-hsa-13004	14249.1	-1.79795	0.653948	-2.74938	0.00597083	0.0824892
piR-54194	GXN_558240	piR-hsa-17388	16.2338	1.58447	0.575088	2.75517	0.00586608	0.0824892
piR-57677	GXN_561958	piR-hsa-20774	157.705	-1.4875	0.54085	-2.75029	0.00595419	0.0824892
piR-34460	GXN_568333	piR-hsa-26610	34.9826	2.23815	0.814867	2.74665	0.00602076	0.0824892
piR-37456	GXN_571659	piR-hsa-29661	22.2929	1.40443	0.511303	2.74677	0.0060185	0.0824892
piR-39834	GXN_574195	piR-hsa-31992	120.55	1.64552	0.598314	2.75026	0.00595477	0.0824892
piR-44312	GXN_546358	piR-hsa-6463	50.7249	-1.67057	0.609128	-2.74257	0.00609612	0.0826634
piR-49448	GXN_551986	piR-hsa-11636	24.2103	2.41538	0.880744	2.74243	0.00609856	0.0826634
piR-43080	GXN_545064	piR-hsa-5274	106.807	-1.34308	0.490615	-2.73754	0.0061901	0.0828192
piR-53188	GXN_557080	piR-hsa-16326	20.8931	-1.35366	0.494229	-2.73893	0.00616403	0.0828192
piR-33194	GXN_564780	piR-hsa-23360	43.1822	-1.76994	0.646338	-2.73841	0.00617365	0.0828192
piR-41425	GXN_543257	piR-hsa-3606	19.3861	2.11765	0.77502	2.73238	0.00628776	0.083052
piR-43579	GXN_545571	piR-hsa-5745	449.478	2.0522	0.750727	2.73362	0.00626429	0.083052
piR-54668	GXN_558739	piR-hsa-17846	22.5765	1.81903	0.665705	2.73249	0.00628582	0.083052
piR-40279	GXN_541960	piR-hsa-2418	34.754	-1.83624	0.672633	-2.72992	0.0063349	0.08332
piR-47963	GXN_550327	piR-hsa-10106	59.543	1.61126	0.592523	2.71933	0.00654149	0.0848635
piR-49303	GXN_551832	piR-hsa-11491	4596.66	2.10486	0.773258	2.72207	0.00648745	0.0848635
piR-59803	GXN_564384	piR-hsa-22998	120.08	-1.5004	0.551961	-2.71831	0.00656161	0.0848635
piR-60799	GXN_566565	piR-hsa-24993	190.066	-1.57085	0.577646	-2.7194	0.00654002	0.0848635
piR-40476	GXN_542158	piR-hsa-2600	25.1959	1.14446	0.421301	2.71648	0.00659793	0.0849792
piR-51762	GXN_555619	piR-hsa-14975	20.2861	1.37172	0.505532	2.71341	0.00665941	0.0854166
piR-44647	GXN_546701	piR-hsa-6783	58.7216	-1.76934	0.652771	-2.71051	0.00671798	0.0856747
piR-34534	GXN_568414	piR-hsa-26684	1237.19	-1.08881	0.401821	-2.70968	0.00673474	0.0856747
piR-38928	GXN_573278	piR-hsa-31148	63.4369	2.11437	0.780907	2.70758	0.00677749	0.0858666
piR-42781	GXN_544774	piR-hsa-5004	26.0992	1.32528	0.489995	2.70468	0.0068371	0.0860869
piR-44362	GXN_546412	piR-hsa-6513	85.3888	1.63297	0.603903	2.70403	0.00685034	0.0860869
piR-43603	GXN_545598	piR-hsa-5769	122.636	2.11058	0.782383	2.69762	0.00698366	0.0872206
piR-34325	GXN_568187	piR-hsa-26475	320.299	1.62365	0.602022	2.697	0.00699675	0.0872206
piR-58479	GXN_562898	piR-hsa-21632	144.933	1.6626	0.617515	2.69241	0.00709379	0.0877903
piR-38147	GXN_572342	piR-hsa-30295	28.1521	-1.71923	0.638605	-2.69216	0.00709902	0.0877903
piR-56125	GXN_560340	piR-hsa-19295	31.1522	0.947854	0.352947	2.68554	0.00724128	0.0889569
piR-57394	GXN_561667	piR-hsa-20506	120.702	1.55343	0.57882	2.68379	0.00727933	0.0889569
piR-36107	GXN_570135	piR-hsa-28256	43.6825	2.27686	0.848183	2.6844	0.0072661	0.0889569
piR-45228	GXN_546812	piR-hsa-6884	109.746	-1.39268	0.521233	-2.6719	0.00754236	0.0912355
piR-49463	GXN_552003	piR-hsa-11651	40.4229	2.06886	0.774309	2.67188	0.00754276	0.0912355
piR-50456	GXN_554178	piR-hsa-13653	41.9128	-1.77237	0.664051	-2.66903	0.00760708	0.0912355
piR-51933	GXN_555805	piR-hsa-15146	180.459	-1.48601	0.556635	-2.66964	0.00759323	0.0912355
piR-59868	GXN_564455	piR-hsa-23063	18.6226	-2.35461	0.882279	-2.66878	0.00761276	0.0912355
piR-30180	GXN_539437	piR-hsa-157	21.7394	-1.69661	0.636844	-2.66409	0.00771966	0.0921609
piR-44523	GXN_546569	piR-hsa-6659	552.047	1.89222	0.710901	2.66171	0.00777441	0.0924589
piR-31207	GXN_540893	piR-hsa-1432	243.924	2.08181	0.783238	2.65795	0.0078617	0.0931401
piR-58514	GXN_562936	piR-hsa-21667	18.6254	-1.12943	0.425809	-2.65243	0.00799139	0.0939594
piR-35579	GXN_569592	piR-hsa-27759	30.8125	2.14489	0.808561	2.65273	0.00798433	0.0939594
piR-45028	GXN_547199	piR-hsa-7237	102.957	-1.3663	0.515852	-2.64862	0.00808211	0.0940855
piR-51790	GXN_555649	piR-hsa-15003	21.8187	1.39959	0.528317	2.64915	0.00806954	0.0940855
piR-55216	GXN_559293	piR-hsa-18351	44.9015	1.91081	0.721561	2.64816	0.00809305	0.0940855
piR-32369	GXN_552902	piR-hsa-12480	38.3597	2.33405	0.882568	2.64461	0.00817857	0.0943728
piR-54821	GXN_558891	piR-hsa-17985	72.7586	2.07685	0.785038	2.64554	0.00815605	0.0943728
piR-56668	GXN_560921	piR-hsa-19824	122.692	1.93765	0.733492	2.64168	0.00824969	0.0945521
piR-57339	GXN_561606	piR-hsa-20451	207.575	1.62021	0.613666	2.64021	0.0082855	0.0945521
piR-59068	GXN_563523	piR-hsa-22204	200.568	1.54484	0.585041	2.64056	0.0082769	0.0945521
piR-30561	GXN_540131	piR-hsa-729	21.0482	-1.63464	0.620624	-2.63386	0.00844195	0.0956837
piR-45201	GXN_547387	piR-hsa-7408	20.6622	1.58146	0.600574	2.63325	0.00845724	0.0956837
piR-36771	GXN_570839	piR-hsa-28905	56.6779	1.53118	0.581656	2.63245	0.00847713	0.0956837
piR-41041	GXN_542852	piR-hsa-3237	12332.6	2.32095	0.883842	2.62598	0.00864002	0.0971689
piR-37004	GXN_571204	piR-hsa-29238	61.193	1.69212	0.64477	2.62438	0.00868076	0.0972746
piR-31275	GXN_540968	piR-hsa-1500	22.5984	1.11452	0.425271	2.62073	0.00877412	0.097616
piR-45549	GXN_547721	piR-hsa-7712	48.58	-1.89218	0.721818	-2.6214	0.00875686	0.097616
piR-52846	GXN_556724	piR-hsa-15999	93.32	-1.25826	0.481132	-2.61521	0.00891722	0.0988538
piR-60314	GXN_565957	piR-hsa-24436	74.811	-1.23651	0.473676	-2.61046	0.00904195	0.0998798
piR-35399	GXN_569429	piR-hsa-27608	18.1886	1.27691	0.489998	2.60596	0.00916168	0.100844
piR-31780	GXN_541467	piR-hsa-1962	962.651	2.02011	0.775722	2.60417	0.00920964	0.101013
piR-35697	GXN_569719	piR-hsa-27876	180.223	-1.2032	0.462579	-2.60108	0.00929314	0.101214
piR-39087	GXN_573451	piR-hsa-31306	511.003	-1.79621	0.690418	-2.60163	0.00927806	0.101214
piR-61730	GXN_567515	piR-hsa-25865	61.9453	-1.72105	0.663179	-2.59515	0.00945486	0.102615
piR-41875	GXN_543729	piR-hsa-4042	122.363	1.8095	0.698425	2.59084	0.00957432	0.102833
piR-42268	GXN_544138	piR-hsa-4418	3569.79	-1.46793	0.566481	-2.59132	0.00956093	0.102833
piR-38338	GXN_572533	piR-hsa-30472	144.055	1.39507	0.538301	2.59162	0.00955259	0.102833
piR-44370	GXN_546420	piR-hsa-6521	146.281	1.80059	0.695431	2.58918	0.00962062	0.102974
piR-46364	GXN_548582	piR-hsa-8496	23.0971	-1.21658	0.4719	-2.57805	0.00993583	0.104741
piR-53888	GXN_557906	piR-hsa-17082	145.684	-1.21996	0.473328	-2.57741	0.00995445	0.104741
piR-56062	GXN_560271	piR-hsa-19232	19.0225	1.99707	0.774782	2.57759	0.0099493	0.104741
piR-58986	GXN_563433	piR-hsa-22122	117.253	2.03147	0.787068	2.58106	0.00984967	0.104741
piR-38514	GXN_572720	piR-hsa-30648	17.2004	-1.5304	0.593699	-2.57774	0.00994496	0.104741
piR-44241	GXN_546280	piR-hsa-6392	503.945	2.07195	0.805267	2.573	0.0100823	0.105371
piR-34822	GXN_568715	piR-hsa-26958	64.9574	1.64662	0.639733	2.57392	0.0100553	0.105371
piR-48749	GXN_551157	piR-hsa-10863	31.6866	1.41194	0.550123	2.56659	0.0102703	0.106976
piR-31444	GXN_540787	piR-hsa-1335	16.6976	1.16971	0.456582	2.56188	0.0104108	0.10736
piR-50183	GXN_553901	piR-hsa-13394	31.4133	-1.60776	0.627335	-2.56284	0.010382	0.10736
piR-38165	GXN_572361	piR-hsa-30313	22.6794	-1.60883	0.627768	-2.56278	0.0103839	0.10736
piR-52200	GXN_556081	piR-hsa-15399	17.0076	1.38193	0.539771	2.56022	0.0104605	0.107515
piR-57707	GXN_561991	piR-hsa-20804	31.5564	1.2244	0.479449	2.55377	0.0106565	0.108204
piR-58984	GXN_563431	piR-hsa-22120	83.2429	1.70608	0.667419	2.55623	0.0105813	0.108204
piR-60448	GXN_566103	piR-hsa-24570	22.7034	-1.62009	0.634477	-2.55342	0.010667	0.108204
piR-39279	GXN_573644	piR-hsa-31483	28.796	-0.874051	0.342137	-2.55468	0.0106285	0.108204
piR-41583	GXN_543426	piR-hsa-3764	798.37	1.82778	0.71696	2.54934	0.0107926	0.109121
piR-34961	GXN_568868	piR-hsa-27097	131.63	1.83923	0.721966	2.54753	0.010849	0.109335
piR-43229	GXN_544645	piR-hsa-4884	19.5389	2.15211	0.845542	2.54525	0.0109201	0.109381
piR-32294	GXN_552821	piR-hsa-12406	195.319	-1.02468	0.402604	-2.54512	0.0109241	0.109381
piR-43933	GXN_545958	piR-hsa-6099	65.8687	1.63102	0.641695	2.54173	0.0110304	0.110092
piR-36805	GXN_570877	piR-hsa-28939	47.4646	2.12968	0.8385	2.53987	0.0110894	0.110197
piR-38317	GXN_572510	piR-hsa-30451	63.2775	-1.21124	0.477026	-2.53916	0.011112	0.110197
piR-56616	GXN_560864	piR-hsa-19772	16.935	2.01775	0.797058	2.53149	0.0113579	0.11209
piR-57863	GXN_562257	piR-hsa-21047	17.7668	-1.3989	0.552958	-2.52985	0.0114112	0.11209
piR-33157	GXN_564739	piR-hsa-23323	267.51	-1.14422	0.452234	-2.53015	0.0114013	0.11209
piR-46430	GXN_548654	piR-hsa-8559	1341.45	-1.15236	0.456119	-2.52644	0.0115226	0.112472
piR-59350	GXN_563814	piR-hsa-22472	19.7856	-1.15663	0.457735	-2.52686	0.0115087	0.112472
piR-45687	GXN_547873	piR-hsa-7849	1699.88	1.31096	0.519329	2.52434	0.0115915	0.11279
piR-42283	GXN_544155	piR-hsa-4433	70.05	-1.90523	0.755328	-2.52239	0.0116562	0.113065
piR-60626	GXN_566281	piR-hsa-24733	32.7013	1.71547	0.680793	2.51982	0.0117415	0.113538
piR-30949	GXN_540523	piR-hsa-1088	197.758	1.74908	0.695608	2.51445	0.0119217	0.114456
piR-54620	GXN_558686	piR-hsa-17798	21.5134	-1.52844	0.608041	-2.5137	0.0119471	0.114456
piR-38166	GXN_572362	piR-hsa-30314	45.3083	1.63934	0.651671	2.51559	0.0118834	0.114456
piR-42261	GXN_544131	piR-hsa-4411	355.907	-1.38134	0.550393	-2.50974	0.0120821	0.115393
piR-49348	GXN_551879	piR-hsa-11536	405.479	-1.41736	0.565847	-2.50484	0.0122507	0.116645
piR-53651	GXN_557666	piR-hsa-16859	150.66	-0.933551	0.373616	-2.49869	0.0124654	0.118326
piR-50413	GXN_554132	piR-hsa-13610	81.8264	-1.24761	0.499763	-2.49639	0.0125463	0.118731
piR-45459	GXN_547638	piR-hsa-7637	60.5273	1.25607	0.504353	2.49046	0.0127577	0.119277
piR-57891	GXN_562288	piR-hsa-21075	60.6209	-1.81433	0.728416	-2.49079	0.0127458	0.119277
piR-60651	GXN_566309	piR-hsa-24758	29.38	2.18593	0.877595	2.49082	0.012745	0.119277
piR-36256	GXN_570297	piR-hsa-28405	41.2357	-1.1771	0.472335	-2.49209	0.0126994	0.119277
piR-49696	GXN_552238	piR-hsa-11868	223.423	1.43835	0.577868	2.48907	0.0128078	0.119386
piR-45858	GXN_548044	piR-hsa-8005	30.8413	-1.11641	0.448825	-2.48741	0.0128678	0.119585
piR-32181	GXN_552715	piR-hsa-12308	24.1322	-0.964377	0.388092	-2.48491	0.0129583	0.11964
piR-50543	GXN_554242	piR-hsa-13711	24.2545	1.65857	0.667685	2.48406	0.0129893	0.11964
piR-59114	GXN_563574	piR-hsa-22250	148.089	1.47601	0.593927	2.48518	0.0129486	0.11964
piR-36272	GXN_570313	piR-hsa-28421	127.581	-1.0887	0.439077	-2.47952	0.013156	0.120817
piR-31762	GXN_541448	piR-hsa-1944	483.822	-0.826324	0.333489	-2.47781	0.0132191	0.121038
piR-42032	GXN_543898	piR-hsa-4197	73.3611	2.18012	0.880283	2.47662	0.0132633	0.121061
piR-43871	GXN_545892	piR-hsa-6037	313.971	1.46224	0.590649	2.47565	0.0132996	0.121061
piR-57583	GXN_561856	piR-hsa-20680	27.785	1.19254	0.482636	2.4709	0.0134775	0.122322
piR-40666	GXN_542365	piR-hsa-2790	26.4433	1.37282	0.55682	2.46546	0.0136836	0.1231
piR-51083	GXN_554785	piR-hsa-75	25.9959	-1.10792	0.449905	-2.46258	0.0137943	0.1231
piR-61227	GXN_567015	piR-hsa-25405	721.35	1.70319	0.691438	2.46325	0.0137682	0.1231
piR-35360	GXN_569386	piR-hsa-27569	564.107	1.79618	0.728519	2.46552	0.0136813	0.1231
piR-35510	GXN_569516	piR-hsa-27690	47390.4	1.63127	0.662473	2.4624	0.0138011	0.1231
piR-37846	GXN_572033	piR-hsa-30008	143.101	1.97678	0.801883	2.46517	0.0136947	0.1231
piR-62013	GXN_567810	piR-hsa-26133	76.3465	-1.84399	0.749783	-2.45936	0.0139185	0.123791
piR-50587	GXN_554290	piR-hsa-13755	1669.65	1.70326	0.694479	2.45257	0.0141841	0.125339
piR-61047	GXN_566819	piR-hsa-25226	20.5333	1.49008	0.607745	2.45182	0.0142137	0.125339
piR-36258	GXN_570299	piR-hsa-28407	38.6465	-1.21348	0.494603	-2.45345	0.0141494	0.125339
piR-32252	GXN_552775	piR-hsa-12364	102.14	-1.8639	0.761841	-2.44658	0.0144219	0.125582
piR-55129	GXN_559197	piR-hsa-18264	67.5643	1.14516	0.46776	2.44817	0.0143584	0.125582
piR-58199	GXN_562608	piR-hsa-21366	468.94	1.93083	0.789372	2.44604	0.0144436	0.125582
piR-33466	GXN_565062	piR-hsa-23617	2644.52	1.70332	0.695684	2.44841	0.014349	0.125582
piR-39260	GXN_573624	piR-hsa-31464	32.1134	1.04361	0.426427	2.44735	0.0143913	0.125582
piR-48759	GXN_551168	piR-hsa-10873	126.277	1.53962	0.630229	2.44295	0.0145676	0.126073
piR-58671	GXN_563108	piR-hsa-21823	20.7791	1.24717	0.51059	2.44262	0.0145813	0.126073
piR-49219	GXN_551415	piR-hsa-11101	6479.55	1.9426	0.796146	2.44	0.0146871	0.126636
piR-57948	GXN_562349	piR-hsa-21132	39.75	-1.3575	0.556824	-2.43793	0.0147716	0.127011
piR-52368	GXN_556260	piR-hsa-15567	20.5689	1.49526	0.613616	2.4368	0.0148179	0.127057
piR-46912	GXN_549159	piR-hsa-9027	74.7653	1.67767	0.689364	2.43365	0.0149476	0.127099
piR-48800	GXN_551213	piR-hsa-10914	61.6946	-1.57553	0.647167	-2.43449	0.0149126	0.127099
piR-34844	GXN_568739	piR-hsa-26980	237.955	-1.08068	0.444266	-2.43251	0.0149946	0.127099
piR-38240	GXN_572427	piR-hsa-30374	123.461	1.40131	0.575509	2.43491	0.0148954	0.127099
piR-38286	GXN_572476	piR-hsa-30420	16.7607	-1.45323	0.597617	-2.43172	0.0150275	0.127099
piR-40925	GXN_542741	piR-hsa-3137	92.7299	1.87322	0.770715	2.43049	0.0150783	0.127183
piR-30855	GXN_540437	piR-hsa-1008	242.338	-1.43095	0.590583	-2.42295	0.015395	0.127329
piR-31080	GXN_540662	piR-hsa-1219	502.146	1.14687	0.474865	2.41514	0.0157292	0.127329
piR-31586	GXN_541291	piR-hsa-1797	36.7527	-1.38122	0.571076	-2.41862	0.0155793	0.127329
piR-41755	GXN_543597	piR-hsa-3922	209.022	2.02174	0.838321	2.41165	0.0158805	0.127329
piR-42419	GXN_544303	piR-hsa-4569	400.505	1.49152	0.618127	2.41296	0.0158235	0.127329
piR-43802	GXN_545816	piR-hsa-5968	184.514	1.46839	0.605246	2.42611	0.0152618	0.127329
piR-43842	GXN_545860	piR-hsa-6008	27.3664	1.38767	0.571757	2.42703	0.0152231	0.127329
piR-53417	GXN_557299	piR-hsa-16526	317.234	-1.61989	0.671841	-2.41112	0.0159035	0.127329
piR-55151	GXN_559222	piR-hsa-18286	1046.82	-1.28997	0.535073	-2.41083	0.0159162	0.127329
piR-55152	GXN_559223	piR-hsa-18287	1029.82	-1.31181	0.544026	-2.41129	0.015896	0.127329
piR-57077	GXN_561355	piR-hsa-20218	24.1424	1.56179	0.647184	2.41321	0.0158126	0.127329
piR-33164	GXN_564747	piR-hsa-23330	55370	-0.964017	0.398874	-2.41685	0.0156556	0.127329
piR-33359	GXN_564945	piR-hsa-23510	24.9116	1.47352	0.609287	2.41843	0.0155877	0.127329
piR-33520	GXN_565105	piR-hsa-23656	56064.2	-0.957069	0.396214	-2.41553	0.0157122	0.127329
piR-60576	GXN_566227	piR-hsa-24683	54001	-0.972017	0.401754	-2.41943	0.0155447	0.127329
piR-60674	GXN_566334	piR-hsa-24781	67.5173	1.39372	0.577787	2.41217	0.0158579	0.127329
piR-60892	GXN_566666	piR-hsa-25086	17.6881	1.28218	0.528762	2.42487	0.0153137	0.127329
piR-61895	GXN_567680	piR-hsa-26015	24.6315	-1.22957	0.508272	-2.41912	0.0155579	0.127329
piR-34456	GXN_568329	piR-hsa-26606	431.444	-1.08723	0.448625	-2.42347	0.0153728	0.127329
piR-36644	GXN_570703	piR-hsa-28778	537.759	1.59036	0.658094	2.41661	0.0156659	0.127329
piR-43606	GXN_545601	piR-hsa-5772	38.6925	-0.862819	0.358339	-2.40783	0.0160476	0.127539
piR-52633	GXN_556529	piR-hsa-15817	22.5661	-1.41644	0.588168	-2.40822	0.0160307	0.127539
piR-55150	GXN_559220	piR-hsa-18285	1055.57	-1.28682	0.534728	-2.40649	0.0161067	0.127539
piR-38443	GXN_572645	piR-hsa-30577	2945.12	-1.27464	0.529519	-2.40717	0.0160767	0.127539
piR-34535	GXN_568416	piR-hsa-26685	1279.56	-0.979807	0.407349	-2.40533	0.0161581	0.12762
piR-51389	GXN_555103	piR-hsa-14499	16.6072	1.29247	0.538259	2.40121	0.0163411	0.128738
NA	GXN_446849	NA	39.5868	1.10097	0.459258	2.39728	0.0165171	0.129294
piR-40094	GXN_541791	piR-hsa-2262	34.2428	-1.42103	0.592486	-2.39843	0.0164657	0.129294
piR-41884	GXN_543739	piR-hsa-4051	567.333	1.97696	0.825509	2.39484	0.0166277	0.129294
piR-51026	GXN_554722	piR-hsa-14151	18.6654	1.67685	0.700286	2.39452	0.0166421	0.129294
piR-58260	GXN_562087	piR-hsa-20892	5516.36	-1.39506	0.582711	-2.39409	0.0166616	0.129294
piR-38720	GXN_572940	piR-hsa-30854	63.2781	-0.946135	0.39498	-2.3954	0.0166023	0.129294
piR-43993	GXN_546008	piR-hsa-6144	54175	-0.955139	0.399665	-2.38985	0.0168552	0.130146
piR-32783	GXN_553466	piR-hsa-12994	28.6756	-1.162	0.486108	-2.39041	0.0168296	0.130146
piR-44480	GXN_546521	piR-hsa-6616	5325.85	1.79788	0.753748	2.38525	0.0170674	0.131457
piR-34415	GXN_568286	piR-hsa-26565	652.287	-0.662067	0.277811	-2.38315	0.017165	0.131882
piR-41621	GXN_543467	piR-hsa-3802	334.829	1.49481	0.62859	2.37803	0.0174052	0.132741
piR-42282	GXN_544154	piR-hsa-4432	245.245	-1.41683	0.595431	-2.37951	0.0173358	0.132741
piR-34698	GXN_568595	piR-hsa-26848	626.208	-1.37815	0.579397	-2.37859	0.0173791	0.132741
piR-43425	GXN_545420	piR-hsa-5605	16.5873	-1.08166	0.455286	-2.37579	0.0175114	0.133224
piR-31702	GXN_540814	piR-hsa-1360	11621.5	2.08814	0.880759	2.37084	0.0177477	0.133379
piR-43929	GXN_545953	piR-hsa-6095	75.6464	1.16762	0.492003	2.3732	0.0176345	0.133379
piR-56397	GXN_560639	piR-hsa-19567	24.3315	-1.161	0.48954	-2.37161	0.0177108	0.133379
piR-61110	GXN_566887	piR-hsa-25288	21.411	1.88597	0.79545	2.37095	0.0177424	0.133379
piR-35809	GXN_569826	piR-hsa-27973	43.8089	1.69393	0.714746	2.36997	0.0177896	0.133379
piR-38814	GXN_573153	piR-hsa-31034	74.9811	1.9985	0.84213	2.37315	0.0176371	0.133379
piR-31108	GXN_540692	piR-hsa-1247	29.5119	1.30131	0.549521	2.36808	0.0178807	0.133739
piR-47692	GXN_550046	piR-hsa-9849	34.9914	1.83986	0.777653	2.36591	0.0179857	0.13402
piR-61546	GXN_567315	piR-hsa-25681	59.4239	-1.43433	0.606346	-2.36552	0.0180046	0.13402
piR-55285	GXN_559353	piR-hsa-18406	22.2741	1.72835	0.731128	2.36395	0.0180811	0.134267
piR-32311	GXN_552840	piR-hsa-12423	57.5777	-1.40936	0.596787	-2.36158	0.018197	0.134508
piR-59941	GXN_564536	piR-hsa-23136	156.017	2.0001	0.846956	2.36152	0.0182001	0.134508
piR-56973	GXN_561257	piR-hsa-20129	123.779	-1.12415	0.476866	-2.35737	0.0184049	0.135377
piR-58562	GXN_562989	piR-hsa-21714	172.674	1.47537	0.625828	2.35746	0.0184002	0.135377
piR-44355	GXN_546405	piR-hsa-6506	24.3634	1.51468	0.643297	2.35456	0.0185447	0.135644
piR-54427	GXN_558477	piR-hsa-17606	26.1987	1.99977	0.849739	2.3534	0.0186028	0.135644
piR-55627	GXN_559824	piR-hsa-18827	121.037	-1.4174	0.602346	-2.35313	0.0186161	0.135644
piR-36594	GXN_570648	piR-hsa-28729	35.7928	1.7933	0.76143	2.35517	0.0185142	0.135644
piR-36742	GXN_570808	piR-hsa-28876	3946.37	-1.01156	0.430183	-2.35147	0.0186994	0.135932
piR-36743	GXN_570809	piR-hsa-28877	3915.2	-1.01185	0.43114	-2.34693	0.0189289	0.137279
piR-50603	GXN_554306	piR-hsa-13771	275.604	1.25859	0.537759	2.34043	0.0192616	0.139366
piR-30039	GXN_539614	piR-hsa-251	50.0432	1.41568	0.606078	2.33581	0.0195013	0.140482
piR-30268	GXN_539847	piR-hsa-465	126.522	-1.63305	0.699167	-2.33571	0.0195064	0.140482
piR-42932	GXN_544937	piR-hsa-5155	55370.3	2.05181	0.880056	2.33146	0.0197293	0.140781
piR-53660	GXN_557675	piR-hsa-16868	27.1335	-1.01376	0.434662	-2.3323	0.0196851	0.140781
piR-35549	GXN_569559	piR-hsa-27729	21937.3	-0.990222	0.424365	-2.33342	0.019626	0.140781
piR-35550	GXN_569560	piR-hsa-27730	21930	-0.98903	0.424094	-2.3321	0.0196953	0.140781
piR-42263	GXN_544133	piR-hsa-4413	29.3386	1.2688	0.544604	2.32977	0.0198185	0.140857
piR-52881	GXN_556762	piR-hsa-16034	58.1007	1.4488	0.621928	2.32954	0.0198307	0.140857
piR-35415	GXN_569446	piR-hsa-27624	2891.49	-0.920492	0.396077	-2.32402	0.0201243	0.142616
piR-34760	GXN_568647	piR-hsa-26896	491.15	-1.14311	0.492235	-2.32229	0.0202174	0.142949
piR-36254	GXN_570294	piR-hsa-28403	106.478	-1.00859	0.43455	-2.32099	0.0202872	0.143117
piR-61709	GXN_567492	piR-hsa-25844	95.6677	1.02783	0.443342	2.31836	0.0204297	0.143796
piR-33764	GXN_565372	piR-hsa-23900	17.288	1.48255	0.640389	2.31508	0.0206083	0.144724
piR-32046	GXN_552571	piR-hsa-12173	1026.06	-1.35646	0.586947	-2.31104	0.0208306	0.145955
piR-47431	GXN_549795	piR-hsa-9617	18.0844	2.04302	0.885613	2.3069	0.0210603	0.146293
piR-48966	GXN_551393	piR-hsa-11080	337.585	1.04306	0.451875	2.3083	0.0209824	0.146293
piR-53379	GXN_557257	piR-hsa-16488	2384.04	-1.37265	0.595031	-2.30685	0.021063	0.146293
piR-36233	GXN_570271	piR-hsa-28382	2004.35	1.13438	0.491759	2.30678	0.0210673	0.146293
piR-33519	GXN_565104	piR-hsa-23655	4435.36	-0.951272	0.412633	-2.30537	0.0211459	0.146511
piR-52286	GXN_556172	piR-hsa-15485	19.4059	-1.70962	0.742563	-2.30232	0.0213169	0.147366
piR-45030	GXN_547201	piR-hsa-7239	38.6572	-0.948935	0.41239	-2.30106	0.0213882	0.147531
piR-41004	GXN_542811	piR-hsa-3200	387.473	-1.07623	0.46832	-2.29806	0.0215586	0.148377
piR-50969	GXN_554691	piR-hsa-14123	26.3909	-1.39717	0.608403	-2.29646	0.0216496	0.148674
piR-32956	GXN_553652	piR-hsa-13167	35.164	-1.48034	0.645423	-2.29359	0.0218141	0.149472
piR-42881	GXN_544881	piR-hsa-5104	38.0019	0.755715	0.330039	2.28977	0.0220345	0.150319
piR-61128	GXN_566907	piR-hsa-25306	246.788	1.31853	0.575707	2.29028	0.0220048	0.150319
piR-44885	GXN_547059	piR-hsa-7109	18.3138	1.78355	0.779857	2.28702	0.0221949	0.150905
piR-61945	GXN_567735	piR-hsa-26065	21.1326	1.17638	0.514462	2.28663	0.0222177	0.150905
piR-33045	GXN_564617	piR-hsa-23211	10346.7	1.33099	0.582779	2.28386	0.0223795	0.151539
piR-61039	GXN_566810	piR-hsa-25218	31.4375	-0.889379	0.389503	-2.28337	0.0224086	0.151539
piR-59070	GXN_563525	piR-hsa-22206	80.1801	1.57724	0.691174	2.28198	0.0224907	0.151763
piR-49468	GXN_552008	piR-hsa-11656	70.0078	2.01791	0.884876	2.28044	0.0225816	0.152046
piR-36326	GXN_570373	piR-hsa-28475	448.932	-0.945277	0.414924	-2.27819	0.0227152	0.152615
piR-40507	GXN_542192	piR-hsa-2631	93.7222	2.00998	0.88329	2.27556	0.0228726	0.153121
piR-33275	GXN_564853	piR-hsa-23426	161.348	1.48038	0.650635	2.27528	0.0228892	0.153121
piR-59497	GXN_562136	piR-hsa-20936	34.8653	-1.00631	0.443088	-2.27113	0.023139	0.154459
piR-44909	GXN_547085	piR-hsa-7133	115.666	1.13841	0.501689	2.26916	0.0232583	0.154591
piR-32822	GXN_553509	piR-hsa-13033	40.3075	-0.98431	0.433752	-2.26929	0.0232506	0.154591
piR-42649	GXN_544522	piR-hsa-4770	43.7052	1.08455	0.478546	2.26634	0.0234303	0.15474
piR-57550	GXN_561820	piR-hsa-20647	25.2694	1.69087	0.746011	2.26655	0.0234175	0.15474
piR-61418	GXN_567190	piR-hsa-25567	28.7207	-1.08589	0.479033	-2.26684	0.0234	0.15474
piR-33123	GXN_564703	piR-hsa-23289	6816.81	-0.961666	0.424869	-2.26344	0.0236085	0.155279
piR-37994	GXN_572176	piR-hsa-30142	17.3344	1.1282	0.498456	2.26338	0.023612	0.155279
piR-44896	GXN_547071	piR-hsa-7120	41.3895	1.30737	0.578169	2.26123	0.0237448	0.155493
piR-57060	GXN_561336	piR-hsa-20201	88.7431	-1.51211	0.668711	-2.26123	0.0237448	0.155493
piR-55759	GXN_559602	piR-hsa-18628	66.2465	-1.35281	0.598738	-2.25943	0.0238567	0.155898
piR-36257	GXN_570298	piR-hsa-28406	100.868	-1.04818	0.464147	-2.2583	0.0239267	0.156026
piR-39875	GXN_574240	piR-hsa-32033	1140.83	-1.30405	0.577834	-2.25678	0.0240215	0.156316
piR-32138	GXN_552668	piR-hsa-12265	101.879	-0.986837	0.437468	-2.2558	0.0240835	0.156391
piR-42239	GXN_544106	piR-hsa-4389	26.309	1.39189	0.617568	2.25383	0.0242069	0.156664
piR-44489	GXN_546531	piR-hsa-6625	26.0462	-0.910973	0.404245	-2.25352	0.0242264	0.156664
piR-51077	GXN_554778	piR-hsa-14202	188.798	1.5714	0.697808	2.25191	0.0243277	0.15685
piR-39017	GXN_573375	piR-hsa-31237	107.465	-1.19999	0.532982	-2.25146	0.0243563	0.15685
piR-55989	GXN_560206	piR-hsa-19174	37.8943	1.71309	0.761348	2.25008	0.0244439	0.156983
piR-56831	GXN_561101	piR-hsa-19987	509.556	-0.808702	0.359623	-2.24875	0.0245286	0.156983
piR-35465	GXN_568911	piR-hsa-27136	56.8173	1.27693	0.56772	2.24922	0.0244984	0.156983
piR-57897	GXN_562294	piR-hsa-21081	54.5069	1.66842	0.742858	2.24594	0.0247075	0.157803
piR-31812	GXN_541501	piR-hsa-1994	733.646	1.4884	0.663955	2.24172	0.0249795	0.158314
piR-41034	GXN_542844	piR-hsa-3230	32011.6	1.96744	0.877757	2.24144	0.0249977	0.158314
piR-44935	GXN_547114	piR-hsa-7159	21.4843	1.48632	0.664472	2.23685	0.0252962	0.158314
piR-45883	GXN_548072	piR-hsa-8030	1073.9	-1.40035	0.625624	-2.23833	0.0251993	0.158314
piR-47606	GXN_549951	piR-hsa-9763	147.952	-1.88817	0.844129	-2.23683	0.0252975	0.158314
piR-32534	GXN_553082	piR-hsa-12645	276.577	1.50639	0.672633	2.23954	0.0251207	0.158314
piR-50985	GXN_553380	piR-hsa-12917	57.5778	1.16762	0.521847	2.23747	0.0252556	0.158314
piR-56535	GXN_560775	piR-hsa-19691	20471.9	1.95385	0.873275	2.23738	0.0252614	0.158314
piR-58038	GXN_562431	piR-hsa-21205	16.2925	1.6721	0.745837	2.24192	0.0249667	0.158314
piR-36338	GXN_570386	piR-hsa-28487	915.717	-0.879728	0.392061	-2.24385	0.0248419	0.158314
piR-43777	GXN_545788	piR-hsa-5943	16.2698	1.68962	0.756276	2.23412	0.0254749	0.158609
piR-47229	GXN_549249	piR-hsa-9111	20.1479	-1.22375	0.547766	-2.23406	0.0254788	0.158609
piR-36563	GXN_570614	piR-hsa-28698	57.6653	1.22539	0.54875	2.23306	0.0255452	0.158609
piR-38287	GXN_572477	piR-hsa-30421	39.5753	-1.01369	0.454116	-2.23222	0.0256002	0.158609
piR-39192	GXN_573565	piR-hsa-31411	171.39	-1.20011	0.537597	-2.23235	0.0255915	0.158609
piR-57567	GXN_561838	piR-hsa-20664	26.9789	1.08925	0.488281	2.23079	0.0256947	0.158877
piR-30037	GXN_539612	piR-hsa-249	43.5861	0.971658	0.43848	2.21597	0.0266934	0.160506
piR-40287	GXN_541969	piR-hsa-2426	40.6112	1.32575	0.598207	2.2162	0.0266776	0.160506
piR-40655	GXN_542353	piR-hsa-2779	25.7632	-0.70404	0.318179	-2.21272	0.0269171	0.160506
piR-43005	GXN_544985	piR-hsa-5199	52.4857	-1.3045	0.586644	-2.22367	0.0261704	0.160506
piR-43034	GXN_545016	piR-hsa-5228	16.4009	-1.13572	0.512224	-2.21723	0.0266074	0.160506
piR-43176	GXN_545167	piR-hsa-5370	1071.95	-1.10837	0.500549	-2.21431	0.0268073	0.160506
piR-44683	GXN_546741	piR-hsa-6819	38.8066	-1.49138	0.67231	-2.21829	0.0265349	0.160506
piR-44940	GXN_547119	piR-hsa-7164	161.257	1.60016	0.721509	2.21779	0.0265692	0.160506
piR-45626	GXN_547806	piR-hsa-7788	366.129	1.41413	0.63631	2.22238	0.0262573	0.160506
piR-45884	GXN_548073	piR-hsa-8031	1166.92	-1.36981	0.619114	-2.21254	0.0269295	0.160506
piR-46902	GXN_549148	piR-hsa-9017	21.8734	-0.923559	0.417335	-2.21299	0.0268983	0.160506
piR-50691	GXN_554402	piR-hsa-13859	97.3316	1.50155	0.678738	2.21226	0.0269487	0.160506
piR-53089	GXN_556971	piR-hsa-16227	29.3901	-1.33863	0.603759	-2.21715	0.0266126	0.160506
piR-53648	GXN_557662	piR-hsa-16856	58.2696	-0.748842	0.337185	-2.22086	0.0263602	0.160506
piR-33064	GXN_564638	piR-hsa-23230	140.608	-0.76689	0.34593	-2.21689	0.0266304	0.160506
piR-61539	GXN_567307	piR-hsa-25674	25.0103	1.21804	0.550745	2.21163	0.0269922	0.160506
piR-34914	GXN_568816	piR-hsa-27050	94.3956	1.49238	0.672217	2.22008	0.0264133	0.160506
piR-36056	GXN_570079	piR-hsa-28205	112.739	-1.03724	0.468721	-2.21292	0.0269034	0.160506
piR-38951	GXN_573303	piR-hsa-31171	132.913	-0.719001	0.323003	-2.22599	0.0260149	0.160506
piR-39245	GXN_573608	piR-hsa-31449	56.4942	-1.04586	0.471348	-2.21886	0.0264962	0.160506
piR-49560	GXN_552093	piR-hsa-11733	131.085	1.53419	0.694053	2.21048	0.0270719	0.160672
piR-30689	GXN_539485	piR-hsa-201	25.6148	0.95768	0.434888	2.20213	0.0276561	0.161019
piR-41012	GXN_542820	piR-hsa-3208	68.7533	-1.2647	0.572639	-2.20855	0.0272061	0.161019
piR-41972	GXN_543833	piR-hsa-4137	21.9277	1.41492	0.643324	2.19939	0.0278501	0.161019
piR-42265	GXN_544135	piR-hsa-4415	146.097	-1.19478	0.542522	-2.20228	0.0276458	0.161019
piR-47996	GXN_550347	piR-hsa-10124	22.151	1.71865	0.780518	2.20194	0.0276697	0.161019
piR-49207	GXN_551759	piR-hsa-11424	35.9792	-0.983729	0.446259	-2.20439	0.0274969	0.161019
piR-51401	GXN_555117	piR-hsa-14511	1292.51	1.83341	0.832096	2.20336	0.0275694	0.161019
piR-56731	GXN_560991	piR-hsa-19887	19.2537	-1.0628	0.482699	-2.20179	0.0276803	0.161019
piR-59293	GXN_563752	piR-hsa-22415	72.7559	1.31483	0.597677	2.1999	0.0278142	0.161019
piR-34013	GXN_565630	piR-hsa-24135	26.2058	1.73352	0.786332	2.20457	0.0274844	0.161019
piR-34210	GXN_566504	piR-hsa-24938	16.9233	1.55515	0.705863	2.20318	0.0275817	0.161019
piR-35313	GXN_569334	piR-hsa-27522	47.0675	1.72298	0.783421	2.1993	0.0278568	0.161019
piR-36032	GXN_570053	piR-hsa-28181	27.5767	1.30353	0.591088	2.2053	0.0274329	0.161019
piR-39471	GXN_572982	piR-hsa-30893	29.0318	1.46124	0.664391	2.19938	0.0278513	0.161019
piR-56058	GXN_560266	piR-hsa-19228	262.212	1.62961	0.741517	2.19768	0.0279722	0.161386
piR-50712	GXN_554425	piR-hsa-13880	19.5958	0.898684	0.40934	2.19545	0.0281316	0.161836
piR-57939	GXN_562339	piR-hsa-21123	28.9957	1.33212	0.606854	2.19513	0.0281544	0.161836
piR-32061	GXN_552588	piR-hsa-12188	404.997	1.26036	0.574551	2.19365	0.0282606	0.162146
piR-31589	GXN_541294	piR-hsa-1800	95.6429	-0.564995	0.258285	-2.18749	0.0287069	0.163001
piR-41542	GXN_543381	piR-hsa-3723	19.9993	1.30879	0.598063	2.18838	0.028642	0.163001
piR-32545	GXN_553094	piR-hsa-12656	75.713	1.73614	0.793909	2.18682	0.0287554	0.163001
piR-51161	GXN_554870	piR-hsa-14285	3718.65	-1.21976	0.557855	-2.18652	0.0287772	0.163001
piR-56037	GXN_560243	piR-hsa-19207	20.3085	1.21266	0.554539	2.18679	0.0287578	0.163001
piR-60076	GXN_565698	piR-hsa-24198	23.3785	-1.10795	0.506685	-2.18667	0.0287664	0.163001
piR-36664	GXN_570725	piR-hsa-28798	36.4842	1.40272	0.64083	2.1889	0.0286038	0.163001
piR-41849	GXN_543700	piR-hsa-4016	89.1307	-1.13623	0.52068	-2.1822	0.0290946	0.163593
piR-42755	GXN_544746	piR-hsa-4978	54.1972	1.30185	0.596378	2.18293	0.0290412	0.163593
piR-47161	GXN_549519	piR-hsa-9361	2323.07	-1.11741	0.511566	-2.1843	0.02894	0.163593
piR-48655	GXN_551054	piR-hsa-10769	568.492	1.79045	0.820085	2.18325	0.0290173	0.163593
piR-58307	GXN_562710	piR-hsa-21460	2321.37	1.52048	0.697155	2.18098	0.0291848	0.163593
piR-58362	GXN_562771	piR-hsa-21515	18.4187	1.45655	0.667895	2.1808	0.029198	0.163593
piR-31905	GXN_541602	piR-hsa-2087	411.129	-1.14377	0.525214	-2.17772	0.0294267	0.164577
piR-35059	GXN_569072	piR-hsa-27283	7824.96	-0.957697	0.440116	-2.17601	0.0295547	0.164996
piR-43548	GXN_545537	piR-hsa-5714	69.0202	1.5462	0.711888	2.17198	0.0298575	0.165201
piR-44371	GXN_546422	piR-hsa-6522	31.4251	1.04526	0.480636	2.17474	0.0296493	0.165201
piR-36321	GXN_570367	piR-hsa-28470	27.2519	-1.39248	0.64099	-2.17239	0.029826	0.165201
piR-38626	GXN_572839	piR-hsa-30760	66.2664	-0.909349	0.418296	-2.17393	0.02971	0.165201
piR-39018	GXN_573376	piR-hsa-31238	117.467	-1.14021	0.524749	-2.17286	0.029791	0.165201
piR-31612	GXN_541319	piR-hsa-1823	553.477	-0.948223	0.437749	-2.16613	0.030301	0.165226
piR-44469	GXN_544696	piR-hsa-4931	149.401	1.7829	0.823807	2.16422	0.0304475	0.165226
piR-43369	GXN_545359	piR-hsa-5549	60.1041	1.90873	0.880428	2.16796	0.0301621	0.165226
piR-43912	GXN_545935	piR-hsa-6078	483.018	-1.47347	0.680804	-2.16431	0.0304409	0.165226
piR-45875	GXN_548063	piR-hsa-8022	99.3698	-1.12247	0.517888	-2.1674	0.0302041	0.165226
piR-32648	GXN_553207	piR-hsa-12759	284.131	-1.07032	0.494388	-2.16493	0.0303929	0.165226
piR-32939	GXN_553634	piR-hsa-13150	35.0759	1.46914	0.677706	2.16781	0.0301731	0.165226
piR-60418	GXN_566071	piR-hsa-24540	215.736	-0.945747	0.435713	-2.17057	0.0299636	0.165226
piR-61174	GXN_566958	piR-hsa-25352	70.053	-1.2103	0.558203	-2.16821	0.0301426	0.165226
piR-34920	GXN_568823	piR-hsa-27056	23.0458	0.984944	0.454583	2.1667	0.0302577	0.165226
piR-36510	GXN_570557	piR-hsa-28645	51.7046	1.55013	0.715528	2.16642	0.0302795	0.165226
piR-31112	GXN_540697	piR-hsa-1251	18.9736	0.750106	0.346708	2.16351	0.0305022	0.165233
piR-30593	GXN_540166	piR-hsa-761	60.5116	0.981203	0.454188	2.16034	0.0307461	0.165687
piR-40241	GXN_541920	piR-hsa-2380	21.4865	-0.761501	0.352384	-2.161	0.0306956	0.165687
piR-49375	GXN_551909	piR-hsa-11563	160.271	1.32142	0.611298	2.16166	0.0306446	0.165687
piR-49469	GXN_552009	piR-hsa-11657	25244.9	0.843644	0.390811	2.1587	0.0308733	0.165797
piR-56218	GXN_560442	piR-hsa-19388	43.092	-1.04308	0.483101	-2.15913	0.0308403	0.165797
piR-40685	GXN_542385	piR-hsa-2809	169.378	-1.56931	0.727711	-2.15651	0.0310442	0.165832
piR-32091	GXN_552619	piR-hsa-12218	189.06	1.25221	0.580597	2.15676	0.0310241	0.165832
piR-58413	GXN_562827	piR-hsa-21566	16.7754	1.14775	0.532382	2.15587	0.0310936	0.165832
piR-36041	GXN_570063	piR-hsa-28190	4011.02	-0.745941	0.345937	-2.15629	0.0310608	0.165832
piR-53194	GXN_557087	piR-hsa-16332	17.7282	-1.80563	0.838701	-2.15289	0.0313274	0.166793
piR-48653	GXN_551052	piR-hsa-10767	89.0279	-0.652941	0.303457	-2.15167	0.031423	0.16701
piR-38583	GXN_572793	piR-hsa-30717	31.0696	0.889477	0.413517	2.15101	0.0314757	0.16701
piR-36236	GXN_570275	piR-hsa-28385	4017.98	1.55186	0.722477	2.14797	0.0317164	0.16778
piR-36255	GXN_570296	piR-hsa-28404	296.938	-0.823026	0.383193	-2.14781	0.031729	0.16778
piR-58054	GXN_562449	piR-hsa-21221	19.6793	-1.13362	0.528076	-2.1467	0.0318172	0.16796
piR-33730	GXN_565334	piR-hsa-23866	41.2112	-0.870034	0.405512	-2.14552	0.0319114	0.168171
piR-51152	GXN_554860	piR-hsa-14276	16.6529	-0.953839	0.44491	-2.14389	0.0320413	0.168449
piR-33373	GXN_564961	piR-hsa-23524	853.625	1.65687	0.77297	2.14351	0.0320725	0.168449
piR-40302	GXN_541986	piR-hsa-2441	22.1129	0.99808	0.466033	2.14165	0.0322217	0.168946
piR-33437	GXN_565030	piR-hsa-23588	57.0571	-1.09835	0.513027	-2.14093	0.0322799	0.168966
piR-59155	GXN_563619	piR-hsa-22291	52.9432	1.62688	0.761624	2.13607	0.0326741	0.170168
piR-36892	GXN_570972	piR-hsa-29026	25.0709	1.22272	0.572416	2.13607	0.0326738	0.170168
piR-37017	GXN_571219	piR-hsa-29251	35.3437	0.876654	0.410365	2.13628	0.0326566	0.170168
NA	GXN_446880	NA	66.3102	-0.890231	0.417418	-2.13271	0.0329486	0.170739
piR-46807	GXN_549044	piR-hsa-8922	144.238	1.62287	0.760863	2.13293	0.0329305	0.170739
piR-47322	GXN_549679	piR-hsa-9508	189.133	-0.947491	0.444188	-2.13309	0.0329175	0.170739
piR-36262	GXN_570303	piR-hsa-28411	273.097	1.66005	0.779028	2.13093	0.033095	0.171212
piR-55252	GXN_559317	piR-hsa-18373	4848.85	1.86214	0.87487	2.12848	0.0332972	0.171971
piR-38235	GXN_572422	piR-hsa-30369	242.565	1.35591	0.63791	2.12555	0.0335406	0.17294
piR-40176	GXN_541881	piR-hsa-2344	33.7481	1.10095	0.518261	2.12432	0.0336432	0.173182
piR-46528	GXN_548760	piR-hsa-8657	16.3512	1.45517	0.686433	2.1199	0.0340147	0.174804
piR-45046	GXN_547219	piR-hsa-7255	43.5944	-1.57888	0.745595	-2.11761	0.0342081	0.175049
piR-32348	GXN_552879	piR-hsa-12459	114.094	-1.7555	0.82911	-2.11733	0.0342315	0.175049
piR-58301	GXN_562704	piR-hsa-21454	27.4457	-1.04168	0.491967	-2.11738	0.0342276	0.175049
piR-33984	GXN_565614	piR-hsa-24120	30.5142	-1.01008	0.47734	-2.11607	0.034339	0.175309
piR-41525	GXN_543362	piR-hsa-3706	39.6101	1.06629	0.50433	2.11427	0.0344921	0.175776
piR-59918	GXN_564510	piR-hsa-23113	36.7033	-0.93252	0.441324	-2.11301	0.0346002	0.175776
piR-61651	GXN_567431	piR-hsa-25786	325.37	1.06963	0.506123	2.11338	0.0345685	0.175776
piR-36245	GXN_570285	piR-hsa-28394	18.6754	-1.29655	0.614775	-2.10898	0.0349459	0.177242
piR-39128	GXN_573496	piR-hsa-31347	57.6732	1.4699	0.697918	2.10612	0.035194	0.178209
piR-50927	GXN_554645	piR-hsa-14081	19.5297	1.86394	0.885662	2.10458	0.0353281	0.178597
piR-41407	GXN_543237	piR-hsa-3588	26.6537	1.86206	0.885403	2.10307	0.0354595	0.17897
piR-57185	GXN_561472	piR-hsa-20326	102.244	-1.13316	0.539323	-2.10109	0.0356334	0.179555
piR-40180	GXN_541885	piR-hsa-2348	56.2281	-0.690414	0.328922	-2.09902	0.035815	0.179744
piR-41811	GXN_543659	piR-hsa-3978	18.6427	0.877865	0.418292	2.09869	0.0358446	0.179744
piR-57086	GXN_561365	piR-hsa-20227	32.0326	-0.947242	0.451205	-2.09936	0.0357853	0.179744
piR-32016	GXN_541708	piR-hsa-2184	32.7001	-1.3713	0.654927	-2.09383	0.0362752	0.179777
piR-42377	GXN_544257	piR-hsa-4527	328.265	-1.14887	0.548959	-2.09282	0.0363648	0.179777
piR-42614	GXN_544485	piR-hsa-4735	28.938	1.84764	0.883152	2.09209	0.0364303	0.179777
piR-49673	GXN_552215	piR-hsa-11845	44.8602	1.46421	0.698436	2.09641	0.0360456	0.179777
piR-51394	GXN_555109	piR-hsa-14504	34.572	1.21408	0.579186	2.09619	0.0360653	0.179777
piR-55279	GXN_559346	piR-hsa-18400	20.5649	-1.00756	0.480598	-2.09647	0.0360406	0.179777
piR-57656	GXN_561935	piR-hsa-20753	240.6	-1.07102	0.511877	-2.09234	0.0364082	0.179777
piR-60195	GXN_565827	piR-hsa-24317	18.4328	-1.0917	0.521554	-2.09317	0.0363344	0.179777
piR-34911	GXN_568813	piR-hsa-27047	26.7315	0.970307	0.463565	2.09314	0.0363364	0.179777
piR-36846	GXN_570922	piR-hsa-28980	41.5425	-1.60598	0.766626	-2.09487	0.0361824	0.179777
piR-48209	GXN_550579	piR-hsa-10337	34.7437	1.10519	0.530065	2.08501	0.0370681	0.182634
piR-37764	GXN_571946	piR-hsa-29926	23.5565	1.61938	0.777374	2.08314	0.0372386	0.183183
piR-34998	GXN_569005	piR-hsa-27222	98.7642	1.13058	0.54294	2.08234	0.0373114	0.183251
piR-45035	GXN_547207	piR-hsa-7244	22.3606	1.04304	0.501731	2.07888	0.0376287	0.184517
piR-45938	GXN_548131	piR-hsa-8085	266.909	-0.867505	0.417735	-2.07669	0.0378305	0.185114
piR-55021	GXN_559079	piR-hsa-18156	2146.57	1.53709	0.740547	2.07562	0.0379292	0.185114
piR-35799	GXN_569815	piR-hsa-27963	41.11	1.65398	0.796679	2.07609	0.0378852	0.185114
piR-36169	GXN_570203	piR-hsa-28318	1050.07	-0.85119	0.410533	-2.07338	0.0381373	0.185837
piR-54874	GXN_558949	piR-hsa-18038	25.5654	1.58006	0.763712	2.06892	0.0385534	0.187277
piR-57035	GXN_561309	piR-hsa-20176	26.2794	1.75796	0.849511	2.06938	0.0385109	0.187277
piR-42524	GXN_544387	piR-hsa-4645	22.0432	1.13242	0.547679	2.06768	0.03867	0.18755
piR-41646	GXN_543494	piR-hsa-3827	16.7857	1.70811	0.82746	2.06428	0.0389908	0.188564
piR-45049	GXN_547222	piR-hsa-7258	79.9055	-1.08238	0.524363	-2.06418	0.0390006	0.188564
piR-43918	GXN_545941	piR-hsa-6084	35.1322	1.19345	0.578527	2.06291	0.0391207	0.18885
piR-45699	GXN_547886	piR-hsa-7861	18.8319	1.49501	0.725583	2.06042	0.0393583	0.189408
piR-55019	GXN_559076	piR-hsa-18154	19.1495	1.12228	0.544609	2.06071	0.0393309	0.189408
piR-51207	GXN_554920	piR-hsa-14331	35.0734	1.05074	0.510185	2.05952	0.0394447	0.18953
piR-31537	GXN_541237	piR-hsa-1748	39.2254	1.07191	0.520647	2.0588	0.0395136	0.189568
piR-40133	GXN_541834	piR-hsa-2301	17.734	1.03924	0.505633	2.05533	0.0398473	0.189702
piR-41173	GXN_542997	piR-hsa-3369	78.874	-0.994314	0.483673	-2.05576	0.039806	0.189702
piR-49666	GXN_552208	piR-hsa-11838	19.5342	-0.949682	0.461568	-2.05752	0.0396367	0.189702
piR-54033	GXN_558064	piR-hsa-17227	18.6999	-1.00286	0.487722	-2.05622	0.0397612	0.189702
piR-38897	GXN_573245	piR-hsa-31117	32.872	-1.20896	0.58784	-2.05661	0.0397239	0.189702
piR-45190	GXN_547374	piR-hsa-7397	32.7678	-1.03878	0.50569	-2.05417	0.0399589	0.189942
piR-46307	GXN_548519	piR-hsa-8439	38.3785	-1.06415	0.518428	-2.05264	0.0401071	0.190355
piR-47914	GXN_550274	piR-hsa-10057	27.6882	-0.895667	0.436972	-2.04971	0.0403923	0.190999
piR-47926	GXN_550287	piR-hsa-10069	42.0132	1.11003	0.541813	2.04873	0.0404888	0.190999
piR-60142	GXN_565769	piR-hsa-24264	237.649	-1.23297	0.601402	-2.05016	0.0403484	0.190999
piR-36479	GXN_570523	piR-hsa-28614	29.7993	1.57213	0.767217	2.04913	0.0404493	0.190999
piR-41841	GXN_543692	piR-hsa-4008	143.484	-1.03254	0.504733	-2.04572	0.0407841	0.191267
piR-32821	GXN_553508	piR-hsa-13032	439.384	1.26609	0.618455	2.04718	0.0406401	0.191267
piR-51912	GXN_555782	piR-hsa-15125	34.1954	-0.832343	0.406887	-2.04564	0.0407922	0.191267
piR-34180	GXN_568044	piR-hsa-26346	30.9502	-0.712139	0.348013	-2.0463	0.0407271	0.191267
piR-41330	GXN_543152	piR-hsa-3511	958.043	1.07889	0.527966	2.04349	0.0410042	0.191971
piR-30477	GXN_540039	piR-hsa-645	80.3286	1.36179	0.666734	2.04247	0.0411045	0.192151
piR-61440	GXN_567214	piR-hsa-25589	2711.19	-0.865294	0.423855	-2.04149	0.0412023	0.192319
piR-57975	GXN_562379	piR-hsa-21158	23.1791	-1.06026	0.51986	-2.03951	0.0413996	0.192753
piR-35054	GXN_569066	piR-hsa-27278	30.8404	1.32918	0.651781	2.03931	0.0414195	0.192753
piR-41827	GXN_543676	piR-hsa-3994	23.994	-1.21391	0.595699	-2.03778	0.0415715	0.192765
piR-42642	GXN_544515	piR-hsa-4763	22.1119	-0.870375	0.427196	-2.03741	0.0416085	0.192765
piR-32301	GXN_552829	piR-hsa-12413	97.9733	-1.02826	0.504441	-2.03842	0.0415081	0.192765
piR-40191	GXN_541897	piR-hsa-2359	32.7014	-1.08377	0.532751	-2.03429	0.0419221	0.193929
piR-41592	GXN_543436	piR-hsa-3773	20.399	-1.57967	0.776813	-2.03353	0.0419992	0.193996
piR-50084	GXN_553793	piR-hsa-13295	20.6624	1.42575	0.702495	2.02955	0.0424023	0.195511
piR-54872	GXN_558947	piR-hsa-18036	25.2826	1.56149	0.769803	2.02843	0.042516	0.195511
piR-33163	GXN_564746	piR-hsa-23329	20.3657	-1.29135	0.636475	-2.02891	0.0424673	0.195511
piR-32107	GXN_552635	piR-hsa-12234	285.808	-1.00524	0.495982	-2.02677	0.0426855	0.195631
piR-58356	GXN_562764	piR-hsa-21509	162.251	-0.809767	0.399567	-2.02661	0.042702	0.195631
piR-34664	GXN_568557	piR-hsa-26814	313.295	-0.66566	0.328506	-2.02633	0.0427312	0.195631
piR-42782	GXN_544775	piR-hsa-5005	18.6267	1.19094	0.588079	2.02514	0.0428528	0.195898
piR-48799	GXN_551212	piR-hsa-10913	23.0526	0.911066	0.450119	2.02406	0.0429643	0.196014
piR-53529	GXN_557532	piR-hsa-16737	2641.42	1.76242	0.871166	2.02306	0.0430674	0.196014
piR-33107	GXN_564685	piR-hsa-23273	743.599	1.56509	0.77353	2.02331	0.0430413	0.196014
piR-40524	GXN_542211	piR-hsa-2648	27.4467	0.662308	0.327687	2.02116	0.0432631	0.196328
piR-45199	GXN_547384	piR-hsa-7406	23.3966	-1.10913	0.548682	-2.02144	0.0432338	0.196328
piR-44002	GXN_546017	piR-hsa-6153	22.5045	1.58346	0.784228	2.01913	0.0434734	0.196995
piR-33729	GXN_565333	piR-hsa-23865	419.902	1.31328	0.651357	2.01622	0.0437775	0.198083
piR-40178	GXN_541883	piR-hsa-2346	42.4483	1.17701	0.585052	2.01181	0.0442402	0.198376
piR-41333	GXN_543156	piR-hsa-3514	1637.04	-0.79368	0.394893	-2.00986	0.0444458	0.198376
piR-45077	GXN_547253	piR-hsa-7284	66.5715	1.66985	0.830254	2.01125	0.044299	0.198376
piR-45927	GXN_548119	piR-hsa-8074	36.0048	1.46915	0.73143	2.00859	0.0445804	0.198376
piR-32376	GXN_552910	piR-hsa-12487	1485.75	-0.997831	0.496494	-2.00976	0.044457	0.198376
piR-32801	GXN_553486	piR-hsa-13012	53.204	1.32451	0.658733	2.0107	0.0443571	0.198376
piR-52162	GXN_556040	piR-hsa-15361	24.8319	1.68949	0.83924	2.01312	0.0441022	0.198376
piR-55023	GXN_559081	piR-hsa-18158	70.3679	-0.766361	0.381031	-2.01129	0.0442953	0.198376
piR-59126	GXN_563587	piR-hsa-22262	22.5437	1.56428	0.777822	2.01111	0.0443143	0.198376
piR-59877	GXN_564465	piR-hsa-23072	26.4299	1.51976	0.756721	2.00834	0.0446069	0.198376
piR-60054	GXN_565674	piR-hsa-24176	25.7375	-1.19197	0.593036	-2.00995	0.0444365	0.198376
piR-60235	GXN_565870	piR-hsa-24357	40.7907	1.64809	0.820895	2.00767	0.0446782	0.198376
piR-38556	GXN_572765	piR-hsa-30690	56.4141	-0.950413	0.473274	-2.00817	0.0446255	0.198376
piR-39303	GXN_573670	piR-hsa-31507	29.6665	-1.29199	0.643701	-2.00712	0.0447368	0.198376
piR-48475	GXN_549323	piR-hsa-9178	18.2632	1.34866	0.672448	2.0056	0.044899	0.198811
piR-44179	GXN_546211	piR-hsa-6330	18.575	-1.63792	0.817219	-2.00426	0.0450425	0.199162
piR-42631	GXN_544503	piR-hsa-4752	18.2027	1.24277	0.620418	2.00311	0.0451651	0.19942
piR-38322	GXN_572515	piR-hsa-30456	26.0086	0.983221	0.492315	1.99714	0.0458103	0.201982
piR-32677	GXN_553239	piR-hsa-12788	70.9654	-0.851564	0.426623	-1.99606	0.0459273	0.202211
piR-31004	GXN_540581	piR-hsa-1143	16.6107	-1.49115	0.747881	-1.99384	0.0461697	0.202448
piR-43200	GXN_545193	piR-hsa-5394	26.6101	1.52557	0.765395	1.99318	0.0462422	0.202448
piR-45782	GXN_547962	piR-hsa-7929	302.183	1.57727	0.791014	1.99399	0.0461531	0.202448
piR-60898	GXN_566672	piR-hsa-25092	157.889	-0.977045	0.490081	-1.99364	0.0461917	0.202448
piR-51266	GXN_554968	piR-hsa-14376	20.9097	0.826078	0.415003	1.99054	0.0465319	0.20343
piR-47995	GXN_550346	piR-hsa-10123	80.3405	1.04056	0.523635	1.98718	0.0469029	0.20449
piR-56879	GXN_561153	piR-hsa-20035	45.0637	-1.10622	0.556688	-1.98715	0.0469063	0.20449
piR-51834	GXN_555698	piR-hsa-15047	22.4972	0.885082	0.445724	1.98572	0.0470644	0.204892
piR-35371	GXN_569398	piR-hsa-27580	16.2734	-0.93872	0.473394	-1.98296	0.0473724	0.205944
piR-48235	GXN_550608	piR-hsa-10363	19.7235	-0.96785	0.48884	-1.97989	0.0477156	0.206765
piR-32858	GXN_553548	piR-hsa-13069	36.6643	-0.887562	0.44838	-1.97949	0.0477612	0.206765
piR-51589	GXN_555431	piR-hsa-14802	44.068	1.12514	0.568329	1.97973	0.047734	0.206765
piR-32731	GXN_553297	piR-hsa-12842	29.3821	0.970621	0.491016	1.97676	0.0480684	0.207517
piR-58071	GXN_562468	piR-hsa-21238	102.335	1.29229	0.653599	1.97719	0.0480203	0.207517
piR-47763	GXN_550108	piR-hsa-9906	74.3494	1.32922	0.673064	1.97488	0.0482818	0.208148
piR-45017	GXN_547187	piR-hsa-7226	89.1768	-0.882529	0.44728	-1.9731	0.0484842	0.208186
piR-52181	GXN_556061	piR-hsa-15380	281.611	0.833591	0.422425	1.97334	0.0484563	0.208186
piR-34608	GXN_568496	piR-hsa-26758	28.5168	0.956212	0.48464	1.97303	0.0484918	0.208186
piR-44341	GXN_546390	piR-hsa-6492	59.6208	-0.929964	0.471777	-1.97119	0.0487019	0.208799
piR-31286	GXN_540980	piR-hsa-1511	19.5365	1.61677	0.825081	1.95953	0.0500512	0.213238
piR-43497	GXN_545481	piR-hsa-5663	19.2553	1.73642	0.885392	1.96119	0.0498574	0.213238
piR-50785	GXN_554489	piR-hsa-13939	47.4049	-1.24119	0.633329	-1.95978	0.0500211	0.213238
piR-51106	GXN_554810	piR-hsa-14230	24.1774	1.73057	0.882896	1.96011	0.049983	0.213238
piR-58198	GXN_562607	piR-hsa-21365	113.196	-0.851594	0.434648	-1.95927	0.0500807	0.213238
piR-31455	GXN_541147	piR-hsa-1666	22.8469	1.15339	0.590892	1.95196	0.0509435	0.214557
piR-40236	GXN_541914	piR-hsa-2375	91.4364	0.953636	0.488415	1.95251	0.0508774	0.214557
piR-40408	GXN_542100	piR-hsa-2547	30.1344	1.22495	0.626846	1.95416	0.0506828	0.214557
piR-51974	GXN_555850	piR-hsa-15187	17.5977	1.63417	0.836119	1.95447	0.0506459	0.214557
piR-57815	GXN_562204	piR-hsa-20999	33.8817	0.935353	0.479168	1.95204	0.0509339	0.214557
piR-33493	GXN_565092	piR-hsa-23644	21356.4	1.69434	0.867986	1.95204	0.0509334	0.214557
piR-35953	GXN_569983	piR-hsa-28117	1746.87	-1.06251	0.54415	-1.9526	0.0508672	0.214557
piR-36396	GXN_570449	piR-hsa-28545	16.9548	1.45728	0.745652	1.95437	0.0506577	0.214557
piR-51638	GXN_555484	piR-hsa-14851	170.897	1.5339	0.787422	1.948	0.0514153	0.216051
piR-61613	GXN_567389	piR-hsa-25748	73.8623	1.45161	0.745471	1.94723	0.051507	0.216051
piR-35221	GXN_568898	piR-hsa-27124	3080.87	1.09367	0.561497	1.94777	0.0514426	0.216051
piR-58244	GXN_562657	piR-hsa-21411	331.016	1.28587	0.661319	1.94439	0.051848	0.217188
piR-45521	GXN_547691	piR-hsa-7684	86.1942	-0.63527	0.326888	-1.94339	0.0519694	0.217403
piR-42264	GXN_544134	piR-hsa-4414	196.939	-1.09309	0.563007	-1.94153	0.0521946	0.218051
piR-55770	GXN_559965	piR-hsa-18955	22.1305	-1.12736	0.581235	-1.9396	0.0524289	0.218736
piR-42613	GXN_544484	piR-hsa-4734	48.6097	1.05875	0.54671	1.93658	0.0527972	0.219682
piR-33989	GXN_565619	piR-hsa-24125	20.0278	1.41412	0.730023	1.93709	0.0527349	0.219682
piR-43913	GXN_545936	piR-hsa-6079	252.936	1.03671	0.535662	1.93538	0.0529443	0.219999
piR-39270	GXN_573635	piR-hsa-31474	26.609	-1.14975	0.594542	-1.93384	0.0531326	0.220486
piR-34830	GXN_568724	piR-hsa-26966	193.517	-0.804669	0.416284	-1.93298	0.0532386	0.220631
piR-31613	GXN_541320	piR-hsa-1824	630.832	0.825971	0.429339	1.92382	0.0543772	0.223559
piR-45873	GXN_548061	piR-hsa-8020	102.394	-0.843789	0.438395	-1.92473	0.0542637	0.223559
piR-51846	GXN_555711	piR-hsa-15059	18.3402	0.860451	0.447176	1.92419	0.0543309	0.223559
piR-57817	GXN_562206	piR-hsa-21001	42.232	1.47995	0.768549	1.92564	0.0541499	0.223559
piR-60886	GXN_566659	piR-hsa-25080	42.6562	-1.18631	0.615875	-1.92622	0.0540767	0.223559
piR-35545	GXN_569555	piR-hsa-27725	134.612	-0.859116	0.44623	-1.92528	0.0541949	0.223559
piR-51976	GXN_555852	piR-hsa-15189	19.1267	0.612906	0.318918	1.92183	0.0546274	0.22429
piR-32197	GXN_552731	piR-hsa-12323	34.1725	0.839831	0.437604	1.91916	0.0549646	0.225377
piR-48003	GXN_550354	piR-hsa-10131	75.2153	0.983089	0.512498	1.91823	0.0550819	0.22556
piR-38009	GXN_572193	piR-hsa-30157	20.1419	1.12837	0.589103	1.9154	0.0554412	0.226732
piR-38621	GXN_572833	piR-hsa-30755	74.1972	-1.19932	0.62786	-1.91018	0.0561106	0.229167
piR-32212	GXN_552748	piR-hsa-12338	18.7157	1.40501	0.736731	1.90709	0.056509	0.229887
piR-50070	GXN_553777	piR-hsa-13281	821.727	-0.874262	0.458192	-1.90807	0.0563822	0.229887
piR-38160	GXN_572355	piR-hsa-30308	29.9073	1.11958	0.586921	1.90755	0.0564489	0.229887
piR-61363	GXN_567131	piR-hsa-25512	58.5426	-1.04529	0.548442	-1.90592	0.0566607	0.230203
piR-48780	GXN_551191	piR-hsa-10894	17.1405	0.999492	0.524831	1.90441	0.0568574	0.230398
piR-54728	GXN_558805	piR-hsa-17906	97.4813	-0.95461	0.501176	-1.90474	0.0568138	0.230398
piR-41891	GXN_543747	piR-hsa-4058	23.9239	-0.926964	0.487522	-1.90138	0.0572522	0.231093
piR-51709	GXN_555560	piR-hsa-14922	22.703	1.17799	0.61923	1.90235	0.057126	0.231093
piR-34515	GXN_568394	piR-hsa-26665	47.4131	1.40088	0.736596	1.90183	0.0571929	0.231093
piR-31340	GXN_541039	piR-hsa-1565	92.9833	1.09678	0.577733	1.89841	0.0576415	0.232363
piR-54090	GXN_558126	piR-hsa-17284	40.5317	1.16485	0.614169	1.89662	0.0578775	0.233011
piR-52410	GXN_556305	piR-hsa-15609	231.467	1.3462	0.710802	1.89392	0.0582358	0.234061
piR-52469	GXN_556369	piR-hsa-15668	133.348	-0.967797	0.511111	-1.89352	0.0582892	0.234061
piR-43563	GXN_545554	piR-hsa-5729	127.773	1.32171	0.698798	1.89141	0.0585697	0.234676
piR-39200	GXN_573574	piR-hsa-31419	20.5349	0.967512	0.511578	1.89123	0.0585934	0.234676
piR-57259	GXN_559683	piR-hsa-18702	65.3091	-0.882508	0.466968	-1.88987	0.0587757	0.2348
piR-61389	GXN_567159	piR-hsa-25538	80.4496	-1.01318	0.53605	-1.89008	0.0587476	0.2348
piR-45189	GXN_547373	piR-hsa-7396	7836.01	-0.828843	0.439539	-1.88571	0.059334	0.236174
piR-47262	GXN_549614	piR-hsa-9448	124.482	-1.52788	0.810285	-1.88561	0.0593478	0.236174
piR-61722	GXN_567507	piR-hsa-25857	110.847	-0.766368	0.406263	-1.88638	0.0592433	0.236174
piR-56761	GXN_561024	piR-hsa-19917	23.1843	-0.909399	0.4825	-1.88477	0.0594614	0.236323
piR-32990	GXN_553689	piR-hsa-13201	16.8656	-0.946751	0.503335	-1.88095	0.0599781	0.238072
piR-42306	GXN_544180	piR-hsa-4456	20.6905	1.02109	0.544158	1.87645	0.0605934	0.239191
piR-52084	GXN_555954	piR-hsa-15283	16.707	-1.26752	0.675724	-1.8758	0.0606832	0.239191
piR-52888	GXN_556769	piR-hsa-16041	21.3806	-1.46056	0.778383	-1.8764	0.0606007	0.239191
piR-53175	GXN_557066	piR-hsa-16313	16.8235	1.28074	0.682328	1.87701	0.0605167	0.239191
piR-35281	GXN_569299	piR-hsa-27490	166.219	-0.680797	0.362993	-1.87551	0.0607224	0.239191
piR-39531	GXN_573886	piR-hsa-31706	20.0812	0.760489	0.405376	1.87601	0.0606541	0.239191
piR-52729	GXN_555263	piR-hsa-14647	6213.26	-1.01299	0.540527	-1.87408	0.0609192	0.239662
piR-30617	GXN_540192	piR-hsa-785	21.3999	-0.908595	0.485981	-1.86961	0.061538	0.24179
piR-45922	GXN_548114	piR-hsa-8069	16.7175	-1.03047	0.552102	-1.86646	0.0619777	0.24321
piR-38975	GXN_573330	piR-hsa-31195	21.7376	1.65123	0.885977	1.86374	0.0623576	0.244391
piR-34249	GXN_568104	piR-hsa-26399	441.718	1.28867	0.691707	1.86304	0.0624572	0.244473
piR-33914	GXN_565537	piR-hsa-24050	43.573	1.42219	0.763863	1.86184	0.0626252	0.244822
piR-38319	GXN_572512	piR-hsa-30453	1459.78	-0.707526	0.380519	-1.85937	0.0629746	0.245878
piR-33465	GXN_565061	piR-hsa-23616	35.0542	1.02548	0.551777	1.8585	0.063098	0.246051
piR-46232	GXN_548437	piR-hsa-8364	23.8284	0.782427	0.421392	1.85677	0.0633442	0.246701
piR-41886	GXN_543741	piR-hsa-4053	883.747	-0.95834	0.516743	-1.85458	0.0636568	0.247396
piR-36355	GXN_570405	piR-hsa-28504	18.412	-0.990405	0.534084	-1.8544	0.0636822	0.247396
piR-60978	GXN_566759	piR-hsa-25172	36.3654	1.49225	0.805162	1.85335	0.0638317	0.247667
piR-44878	GXN_547051	piR-hsa-7102	20.5539	1.0459	0.56503	1.85106	0.0641613	0.248635
piR-36682	GXN_570745	piR-hsa-28816	130.662	0.952426	0.515538	1.84744	0.0646835	0.250346
piR-34767	GXN_568655	piR-hsa-26903	19.4057	0.969229	0.52585	1.84317	0.0653047	0.252436
piR-30590	GXN_540162	piR-hsa-758	41.2777	-0.689076	0.374081	-1.84205	0.0654676	0.25275
piR-60227	GXN_565861	piR-hsa-24349	102.935	1.27491	0.693179	1.83922	0.0658828	0.253722
piR-60459	GXN_566115	piR-hsa-24581	327.65	0.945057	0.513795	1.83937	0.0658612	0.253722
piR-46644	GXN_548885	piR-hsa-8773	147.78	-0.884099	0.481477	-1.83622	0.0663246	0.254822
piR-35150	GXN_569171	piR-hsa-27374	145.64	-1.0153	0.552942	-1.83617	0.0663324	0.254822
piR-32986	GXN_553685	piR-hsa-13197	35.0636	0.97358	0.53125	1.83262	0.0668591	0.25607
piR-51371	GXN_555084	piR-hsa-14481	58.1347	1.32074	0.720741	1.83247	0.0668809	0.25607
piR-58367	GXN_562776	piR-hsa-21520	33.7945	1.59022	0.868001	1.83205	0.0669436	0.25607
piR-61896	GXN_567681	piR-hsa-26016	63.8998	-1.20514	0.657916	-1.83176	0.0669874	0.25607
piR-31206	GXN_540892	piR-hsa-1431	46.0116	1.42526	0.778669	1.83037	0.0671939	0.256199
piR-40873	GXN_542685	piR-hsa-3085	23.8687	-1.20628	0.659614	-1.82877	0.0674337	0.256199
piR-41458	GXN_543293	piR-hsa-3639	68.4815	-0.724277	0.396013	-1.82892	0.067411	0.256199
piR-32819	GXN_553505	piR-hsa-13030	50.4144	0.765634	0.418442	1.82973	0.067291	0.256199
piR-34687	GXN_568583	piR-hsa-26837	42.1192	1.0307	0.563252	1.82992	0.0672623	0.256199
piR-43349	GXN_545338	piR-hsa-5529	25.4471	1.06005	0.580021	1.8276	0.0676091	0.256551
piR-34832	GXN_568726	piR-hsa-26968	30.2201	0.922149	0.504837	1.82663	0.0677561	0.256795
piR-34331	GXN_568193	piR-hsa-26481	47.4793	1.14032	0.625026	1.82444	0.0680852	0.257727
piR-47960	GXN_550323	piR-hsa-10103	37.2065	-0.721591	0.395943	-1.82246	0.0683848	0.258232
piR-52467	GXN_556367	piR-hsa-15666	17.3334	0.816849	0.448139	1.82276	0.0683402	0.258232
piR-30705	GXN_540273	piR-hsa-858	17.0529	1.31893	0.724237	1.82113	0.0685871	0.258681
piR-47545	GXN_549886	piR-hsa-9702	17.8249	1.32223	0.72658	1.8198	0.0687894	0.259129
piR-43888	GXN_545909	piR-hsa-6054	37.1469	-0.621622	0.341692	-1.81925	0.0688736	0.259132
piR-31500	GXN_541196	piR-hsa-1711	2026.73	-0.886707	0.488062	-1.81679	0.0692487	0.25955
piR-41071	GXN_542885	piR-hsa-3267	23.4197	0.921161	0.507318	1.81575	0.0694095	0.25955
piR-51990	GXN_555235	piR-hsa-14620	104.063	1.33387	0.734635	1.81569	0.0694183	0.25955
piR-61441	GXN_567216	piR-hsa-25590	27.0072	0.992246	0.546587	1.81535	0.0694704	0.25955
piR-34789	GXN_568679	piR-hsa-26925	174.779	-0.860579	0.474084	-1.81524	0.0694864	0.25955
piR-35688	GXN_569709	piR-hsa-27867	139.431	1.41292	0.777886	1.81636	0.0693152	0.25955
piR-31960	GXN_540841	piR-hsa-1385	19.5759	1.38496	0.763852	1.81312	0.0698127	0.259626
piR-42457	GXN_542508	piR-hsa-2923	23.9156	-1.47505	0.813804	-1.81254	0.0699029	0.259626
piR-44227	GXN_546264	piR-hsa-6378	329.659	-0.731292	0.403615	-1.81185	0.0700086	0.259626
piR-54695	GXN_558769	piR-hsa-17873	27.4429	-0.792302	0.437051	-1.81284	0.0698571	0.259626
piR-58537	GXN_562961	piR-hsa-21689	42.9113	-0.796429	0.439243	-1.81318	0.0698035	0.259626
piR-38600	GXN_572811	piR-hsa-30734	31.9301	0.912353	0.503506	1.812	0.069986	0.259626
piR-42434	GXN_544320	piR-hsa-4584	38.0874	1.10062	0.607812	1.81078	0.0701745	0.259931
piR-55038	GXN_559097	piR-hsa-18173	35.7668	0.927505	0.512756	1.80886	0.0704727	0.260724
piR-43020	GXN_545001	piR-hsa-5214	35.1245	-0.944468	0.522875	-1.8063	0.0708718	0.261888
piR-37066	GXN_571272	piR-hsa-29300	31.957	-1.00149	0.555247	-1.80368	0.0712808	0.263086
piR-47026	GXN_549376	piR-hsa-9227	20.087	-0.945441	0.52434	-1.80311	0.0713716	0.263108
piR-46229	GXN_546873	piR-hsa-6940	164.685	-0.729952	0.405334	-1.80087	0.071724	0.263781
piR-52423	GXN_556320	piR-hsa-15622	22.215	0.972196	0.539701	1.80136	0.0716459	0.263781
piR-43924	GXN_545948	piR-hsa-6090	26.8538	0.908279	0.50522	1.79779	0.0722106	0.2642
piR-53088	GXN_556970	piR-hsa-16226	95.6021	1.02932	0.572645	1.79749	0.0722574	0.2642
piR-55179	GXN_559252	piR-hsa-18314	18.8	-0.849269	0.4724	-1.79777	0.0722128	0.2642
piR-60691	GXN_566353	piR-hsa-24798	170.006	-1.08969	0.606209	-1.79755	0.0722477	0.2642
piR-61596	GXN_567370	piR-hsa-25731	20.7868	-0.758464	0.421965	-1.79746	0.0722633	0.2642
piR-41617	GXN_543462	piR-hsa-3798	18.0192	1.05124	0.585831	1.79444	0.0727428	0.26564
piR-41516	GXN_543353	piR-hsa-3697	36.5279	1.17926	0.65808	1.79197	0.0731381	0.266769
piR-51420	GXN_555136	piR-hsa-14530	38.3979	-0.996827	0.557136	-1.7892	0.0735828	0.268076
piR-31987	GXN_541676	piR-hsa-2155	160.653	0.857458	0.479512	1.78819	0.0737453	0.268353
piR-34295	GXN_568155	piR-hsa-26445	34.324	1.1862	0.664277	1.7857	0.0741471	0.26887
piR-35917	GXN_569945	piR-hsa-28081	319.49	-1.02546	0.574131	-1.78611	0.074082	0.26887
piR-36074	GXN_570098	piR-hsa-28223	2105.15	-0.827571	0.463264	-1.78639	0.0740361	0.26887
piR-30030	GXN_539604	piR-hsa-242	82.154	1.30396	0.732193	1.7809	0.0749293	0.27005
piR-42652	GXN_544526	piR-hsa-4773	35.0971	-0.720169	0.40405	-1.78238	0.074688	0.27005
piR-42686	GXN_544563	piR-hsa-4807	112.847	-0.676201	0.380097	-1.77902	0.0752359	0.27005
piR-49333	GXN_551864	piR-hsa-11521	52.6756	1.40663	0.790646	1.77909	0.075225	0.27005
piR-52438	GXN_556336	piR-hsa-15637	17.5354	0.995504	0.559185	1.78028	0.0750308	0.27005
piR-52639	GXN_556535	piR-hsa-15823	30.5066	1.30901	0.735818	1.77899	0.0752415	0.27005
piR-56501	GXN_559635	piR-hsa-18657	171.993	1.01388	0.569947	1.7789	0.0752555	0.27005
piR-37546	GXN_571741	piR-hsa-29737	658.089	-0.672806	0.377731	-1.78118	0.0748835	0.27005
piR-38829	GXN_573170	piR-hsa-31049	139.27	1.29881	0.728711	1.78234	0.0746943	0.27005
piR-30293	GXN_539873	piR-hsa-490	48.9991	-0.70695	0.397814	-1.77709	0.0755539	0.270568
piR-41008	GXN_542815	piR-hsa-3204	35.9491	-0.822194	0.463492	-1.77391	0.0760775	0.270568
piR-42077	GXN_543947	piR-hsa-4242	30.8562	1.14503	0.644712	1.77603	0.0757278	0.270568
piR-32623	GXN_553180	piR-hsa-12734	132.247	1.54193	0.868881	1.77462	0.0759609	0.270568
piR-52527	GXN_556415	piR-hsa-15711	27.4385	1.44166	0.811578	1.77636	0.0756733	0.270568
piR-57132	GXN_561416	piR-hsa-20273	23.8167	0.803787	0.45328	1.77327	0.0761844	0.270568
piR-33136	GXN_564716	piR-hsa-23302	23.9667	1.18065	0.665672	1.77362	0.0761259	0.270568
piR-33650	GXN_565247	piR-hsa-23786	191.391	-0.795459	0.448361	-1.77415	0.076039	0.270568
piR-60031	GXN_565650	piR-hsa-24153	30.7655	-0.836476	0.471181	-1.77528	0.0758523	0.270568
piR-53821	GXN_557834	piR-hsa-17015	24.3125	0.904838	0.511099	1.77038	0.076664	0.27196
piR-42124	GXN_543999	piR-hsa-4289	24.8738	0.706313	0.399269	1.76901	0.0768917	0.272456
piR-40084	GXN_541780	piR-hsa-2252	39.0124	-0.95773	0.541909	-1.76733	0.0771735	0.272832
piR-42925	GXN_544929	piR-hsa-5148	24.1072	-0.992055	0.561271	-1.76751	0.077142	0.272832
piR-55722	GXN_559929	piR-hsa-18921	38.9292	-0.630525	0.356885	-1.76674	0.0772711	0.272866
piR-57195	GXN_561482	piR-hsa-20336	116.345	-0.533144	0.301939	-1.76573	0.0774405	0.273154
piR-47239	GXN_549588	piR-hsa-9425	52.1892	-1.2801	0.725307	-1.76491	0.0775786	0.27333
piR-33065	GXN_564639	piR-hsa-23231	249.237	-0.461684	0.262121	-1.76134	0.0781804	0.274524
piR-34808	GXN_568700	piR-hsa-26944	776.982	-0.94908	0.538657	-1.76194	0.0780798	0.274524
piR-35408	GXN_569438	piR-hsa-27617	3830.56	0.999084	0.567233	1.76133	0.0781827	0.274524
piR-31531	GXN_541231	piR-hsa-1742	319.519	-0.790349	0.4493	-1.75907	0.0785659	0.275247
piR-45651	GXN_547834	piR-hsa-7813	20.8472	0.991235	0.563436	1.75927	0.0785318	0.275247
piR-34517	GXN_568396	piR-hsa-26667	18.7179	1.14216	0.649549	1.75839	0.0786809	0.275339
piR-56772	GXN_561036	piR-hsa-19928	17.0005	-0.847789	0.482833	-1.75586	0.0791118	0.276535
piR-44226	GXN_546263	piR-hsa-6377	17.3707	1.42698	0.813937	1.75318	0.0795704	0.277825
piR-40837	GXN_542645	piR-hsa-3049	18.5449	1.41036	0.805142	1.7517	0.0798262	0.278093
piR-46961	GXN_549211	piR-hsa-9076	32.7652	-1.08521	0.619421	-1.75198	0.0797773	0.278093
piR-49619	GXN_552157	piR-hsa-11791	74.3098	1.43738	0.821535	1.74963	0.0801826	0.279021
piR-60302	GXN_565944	piR-hsa-24424	22.5755	1.08963	0.623758	1.74688	0.0806582	0.280362
piR-31179	GXN_539512	piR-hsa-225	48.5908	-1.22025	0.700114	-1.74293	0.0813462	0.280927
piR-47138	GXN_549494	piR-hsa-9338	23.2123	0.822201	0.471406	1.74415	0.0811332	0.280927
piR-32714	GXN_553278	piR-hsa-12825	25.8304	-0.81073	0.464549	-1.7452	0.0809502	0.280927
piR-52222	GXN_556103	piR-hsa-15421	16.1718	-0.898042	0.515358	-1.74256	0.0814104	0.280927
piR-52287	GXN_556173	piR-hsa-15486	19.9348	1.11276	0.638669	1.74231	0.0814545	0.280927
piR-54258	GXN_558293	piR-hsa-17437	175.926	-0.763663	0.437886	-1.74398	0.0811632	0.280927
piR-54897	GXN_558974	piR-hsa-18061	54.9813	0.841269	0.482695	1.74286	0.0813582	0.280927
piR-43238	GXN_545218	piR-hsa-5418	19.5995	0.962365	0.553335	1.73921	0.0819981	0.28124
piR-54341	GXN_558384	piR-hsa-17520	128.453	-0.908905	0.522168	-1.74064	0.081747	0.28124
piR-58584	GXN_563013	piR-hsa-21736	73.3072	0.851968	0.489828	1.73932	0.0819785	0.28124
piR-34783	GXN_568672	piR-hsa-26919	163.883	0.993784	0.570906	1.74071	0.0817337	0.28124
piR-38256	GXN_572444	piR-hsa-30390	28.8376	-0.679134	0.390335	-1.73988	0.0818809	0.28124
piR-56164	GXN_560383	piR-hsa-19334	20.8377	1.04693	0.602664	1.73717	0.0823568	0.282159
piR-40755	GXN_542555	piR-hsa-2967	49.6779	1.07797	0.622008	1.73305	0.083087	0.283043
piR-42123	GXN_543998	piR-hsa-4288	23.7202	0.926655	0.534369	1.73411	0.0828983	0.283043
piR-53110	GXN_556994	piR-hsa-16248	20.6396	-0.816298	0.47095	-1.7333	0.0830421	0.283043
piR-33435	GXN_565028	piR-hsa-23586	30.2255	1.22504	0.707041	1.73263	0.0831622	0.283043
piR-34627	GXN_568517	piR-hsa-26777	21.8951	1.37406	0.793009	1.73272	0.083146	0.283043
piR-37144	GXN_571355	piR-hsa-29378	24.7551	-0.823904	0.474834	-1.73514	0.0827161	0.283043
piR-48008	GXN_550359	piR-hsa-10136	61.0492	-1.07658	0.62183	-1.73131	0.0833959	0.283105
piR-33768	GXN_565376	piR-hsa-23904	40.5582	1.40687	0.812992	1.73049	0.0835435	0.283105
piR-60415	GXN_566068	piR-hsa-24537	587.042	-0.704493	0.407109	-1.73048	0.0835452	0.283105
piR-35181	GXN_569205	piR-hsa-27405	18.3813	1.43333	0.827995	1.73109	0.0834365	0.283105
piR-52003	GXN_555866	piR-hsa-15202	58.6203	-1.18901	0.687619	-1.72917	0.0837785	0.283256
piR-58169	GXN_562575	piR-hsa-21336	18.2999	0.856637	0.495545	1.72868	0.083867	0.283256
piR-61308	GXN_567072	piR-hsa-25457	35.8887	1.10525	0.63929	1.72888	0.0838312	0.283256
piR-36069	GXN_570093	piR-hsa-28218	64.9146	-0.56282	0.325671	-1.72819	0.0839546	0.283256
piR-57816	GXN_562205	piR-hsa-21000	166.249	0.866349	0.50171	1.72679	0.0842053	0.283793
piR-60493	GXN_564308	piR-hsa-22928	16.7496	0.927975	0.537564	1.72626	0.0843007	0.283806
piR-55398	GXN_559477	piR-hsa-18519	366.251	-0.95667	0.554584	-1.72502	0.0845233	0.284247
piR-60852	GXN_566622	piR-hsa-25046	17408.1	-0.733048	0.426624	-1.71825	0.0857509	0.287752
piR-35327	GXN_569350	piR-hsa-27536	39.5047	1.12219	0.652926	1.71871	0.0856666	0.287752
piR-31623	GXN_541331	piR-hsa-1834	738.654	-0.970263	0.564866	-1.71769	0.0858539	0.287787
piR-30113	GXN_539695	piR-hsa-325	236.002	0.893001	0.520816	1.71462	0.0864152	0.288938
piR-47841	GXN_550194	piR-hsa-9984	28.693	-0.927253	0.540898	-1.71428	0.0864766	0.288938
piR-37618	GXN_571819	piR-hsa-29809	23.1616	-0.769761	0.448999	-1.71439	0.0864564	0.288938
piR-38129	GXN_572322	piR-hsa-30277	21.2864	0.937682	0.5474	1.71297	0.0867173	0.289431
piR-30690	GXN_539486	piR-hsa-202	562.465	-0.75252	0.440192	-1.70953	0.0873532	0.290896
piR-41826	GXN_543675	piR-hsa-3993	21.9058	-0.561468	0.328522	-1.70907	0.0874374	0.290896
piR-43956	GXN_545983	piR-hsa-6122	85.3452	0.894778	0.523544	1.70908	0.0874364	0.290896
piR-50694	GXN_554405	piR-hsa-13862	17.482	0.632134	0.370973	1.70399	0.0883831	0.293552
piR-53697	GXN_557715	piR-hsa-16905	29.444	1.22299	0.717818	1.70377	0.088425	0.293552
piR-30691	GXN_539488	piR-hsa-203	35.5633	0.834619	0.49006	1.7031	0.0885501	0.293581
piR-57133	GXN_561417	piR-hsa-20274	24.397	0.846468	0.49713	1.70271	0.0886229	0.293581
piR-36247	GXN_570287	piR-hsa-28396	48.2024	-0.799045	0.469452	-1.70208	0.0887401	0.293656
piR-52594	GXN_556486	piR-hsa-15778	17.0562	0.782962	0.460513	1.70019	0.0890944	0.293913
piR-60685	GXN_566346	piR-hsa-24792	32.2356	-0.754961	0.443962	-1.70051	0.0890352	0.293913
piR-36378	GXN_570429	piR-hsa-28527	5213	-0.865858	0.509282	-1.70016	0.0891017	0.293913
piR-39523	GXN_573877	piR-hsa-31698	43.4435	0.878539	0.517247	1.69849	0.0894152	0.294634
piR-51368	GXN_555080	piR-hsa-14478	45.7904	1.39499	0.822733	1.69556	0.0899695	0.29558
piR-55160	GXN_559231	piR-hsa-18295	47.6792	0.858402	0.506595	1.69446	0.0901787	0.29558
piR-35956	GXN_569987	piR-hsa-28120	38.8149	1.23692	0.729906	1.69463	0.0901464	0.29558
piR-39668	GXN_574032	piR-hsa-31842	29.0072	-1.13517	0.669739	-1.69494	0.0900874	0.29558
piR-39669	GXN_574033	piR-hsa-31843	29.0072	-1.13517	0.669739	-1.69494	0.0900874	0.29558
piR-43591	GXN_545585	piR-hsa-5757	137.315	1.16228	0.687119	1.69153	0.0907364	0.296044
piR-43764	GXN_545774	piR-hsa-5930	38.484	-0.897586	0.530571	-1.69174	0.0906963	0.296044
piR-49111	GXN_551658	piR-hsa-11328	2695.02	1.2881	0.761644	1.69121	0.0907969	0.296044
piR-33864	GXN_565482	piR-hsa-24000	121.425	0.93638	0.553631	1.69134	0.0907714	0.296044
piR-35311	GXN_569332	piR-hsa-27520	38.2507	-0.716654	0.423351	-1.69281	0.090491	0.296044
piR-43765	GXN_545775	piR-hsa-5931	38.5838	-0.890846	0.52779	-1.68788	0.0914348	0.296159
piR-44959	GXN_547140	piR-hsa-7183	523.266	-0.743138	0.44003	-1.68884	0.0912509	0.296159
piR-48910	GXN_551332	piR-hsa-11024	30.9633	-0.738129	0.437375	-1.68763	0.0914816	0.296159
piR-34896	GXN_568797	piR-hsa-27032	87.698	0.876419	0.519348	1.68754	0.0915002	0.296159
piR-35973	GXN_568957	piR-hsa-27179	73.5698	0.692842	0.410264	1.68877	0.0912634	0.296159
piR-36418	GXN_570473	piR-hsa-28567	365.698	1.39068	0.822801	1.69018	0.090993	0.296159
piR-38502	GXN_572708	piR-hsa-30636	23.0824	0.793114	0.469585	1.68897	0.0912255	0.296159
piR-44721	GXN_546767	piR-hsa-6842	23.0712	-0.949518	0.562944	-1.6867	0.0916608	0.29637
piR-52830	GXN_556707	piR-hsa-15983	18.8873	-0.985033	0.584196	-1.68613	0.0917699	0.296414
piR-32170	GXN_552702	piR-hsa-12297	16.9203	1.22507	0.727411	1.68415	0.092153	0.296619
piR-36026	GXN_570047	piR-hsa-28175	216.513	-1.01871	0.605001	-1.68382	0.0922158	0.296619
piR-36249	GXN_570289	piR-hsa-28398	77.1697	-0.767576	0.455727	-1.68429	0.0921261	0.296619
piR-39338	GXN_573709	piR-hsa-31542	21.5332	0.86387	0.512781	1.68467	0.0920514	0.296619
piR-32013	GXN_541705	piR-hsa-2181	37.7468	1.13906	0.676742	1.68315	0.0923456	0.296729
piR-50602	GXN_554305	piR-hsa-13770	1047.33	1.17095	0.696802	1.68047	0.0928665	0.298095
piR-42254	GXN_544123	piR-hsa-4404	21.3409	0.827148	0.492535	1.67937	0.0930804	0.298232
piR-35229	GXN_569242	piR-hsa-27438	124.171	-0.659359	0.392648	-1.67926	0.0931013	0.298232
piR-35284	GXN_569302	piR-hsa-27493	17.6428	-0.731701	0.435883	-1.67867	0.0932172	0.298295
piR-55255	GXN_559320	piR-hsa-18376	26.8548	-0.642941	0.383196	-1.67784	0.0933786	0.298504
piR-53372	GXN_557250	piR-hsa-16481	18.5368	0.905837	0.540843	1.67486	0.0939615	0.300058
piR-32685	GXN_553247	piR-hsa-12796	33.204	-1.02851	0.615602	-1.67073	0.0947748	0.302344
piR-48006	GXN_550357	piR-hsa-10134	51.8997	-1.35735	0.812918	-1.66972	0.0949738	0.302668
piR-44892	GXN_547067	piR-hsa-7116	81.4488	-0.942576	0.564773	-1.66895	0.0951278	0.302848
piR-42993	GXN_544972	piR-hsa-5187	18.7783	-1.15843	0.696623	-1.66292	0.0963285	0.306356
piR-51345	GXN_555055	piR-hsa-14455	18.3656	-0.768369	0.462227	-1.66232	0.0964487	0.306425
piR-32847	GXN_553536	piR-hsa-13058	425.218	0.651469	0.392181	1.66114	0.0966846	0.30686
piR-54146	GXN_558188	piR-hsa-17340	22.908	0.90097	0.542555	1.66061	0.0967925	0.306888
piR-46972	GXN_549223	piR-hsa-9087	17.3695	0.863835	0.52051	1.65959	0.0969964	0.307221
piR-33052	GXN_564625	piR-hsa-23218	605.907	1.05198	0.63407	1.65909	0.0970982	0.30723
piR-51649	GXN_555496	piR-hsa-14862	75.0109	-1.19929	0.724342	-1.6557	0.0977826	0.309081
piR-30488	GXN_540051	piR-hsa-656	21.8205	1.19223	0.720307	1.65517	0.0978892	0.309103
piR-60883	GXN_566656	piR-hsa-25077	18.3976	-0.822242	0.497634	-1.6523	0.0984728	0.31063
piR-32678	GXN_553240	piR-hsa-12789	383358	-0.957002	0.580414	-1.64883	0.0991831	0.312553
piR-56210	GXN_560433	piR-hsa-19380	16.4285	1.10738	0.672847	1.64582	0.099801	0.314181
piR-50751	GXN_554452	piR-hsa-13905	51.5297	1.14382	0.696324	1.64266	0.100453	0.315912
piR-48738	GXN_551145	piR-hsa-10852	40.6643	1.37091	0.83486	1.64209	0.100571	0.315965
piR-31708	GXN_540820	piR-hsa-1366	64.627	-1.14724	0.69996	-1.63901	0.101212	0.316705
piR-31526	GXN_541225	piR-hsa-1737	16.8129	-0.828048	0.505472	-1.63817	0.101387	0.316705
piR-31977	GXN_541665	piR-hsa-2145	42.0846	-0.894763	0.546412	-1.63752	0.101521	0.316705
piR-33229	GXN_564818	piR-hsa-23395	52.9923	0.707198	0.431862	1.63755	0.101515	0.316705
piR-33684	GXN_565285	piR-hsa-23820	31.5246	-0.713548	0.435213	-1.63954	0.101101	0.316705
piR-34871	GXN_568769	piR-hsa-27007	560.766	-0.740714	0.451945	-1.63894	0.101225	0.316705
piR-36871	GXN_570949	piR-hsa-29005	36.3461	1.06456	0.649488	1.63908	0.101198	0.316705
piR-31339	GXN_541038	piR-hsa-1564	22.9933	-1.12253	0.685745	-1.63695	0.10164	0.316758
piR-51724	GXN_555577	piR-hsa-14937	17.2151	0.693376	0.423839	1.63594	0.101852	0.3171
piR-30456	GXN_540017	piR-hsa-624	3871.23	0.717655	0.438976	1.63484	0.102083	0.317499
piR-53415	GXN_557297	piR-hsa-16524	108.129	0.839944	0.513957	1.63427	0.102202	0.317553
piR-37702	GXN_571910	piR-hsa-29893	112.499	-1.00038	0.612525	-1.6332	0.102426	0.317932
piR-44456	GXN_544682	piR-hsa-4918	35.6899	1.14323	0.700777	1.63138	0.102811	0.318412
piR-45029	GXN_547200	piR-hsa-7238	274.402	0.867346	0.531786	1.63101	0.102889	0.318412
piR-49459	GXN_551998	piR-hsa-11647	141.164	-0.808971	0.495794	-1.63167	0.10275	0.318412
piR-42422	GXN_544307	piR-hsa-4572	23.6404	-0.732205	0.449212	-1.62998	0.103106	0.318767
piR-32571	GXN_553123	piR-hsa-12682	188.85	0.874603	0.537386	1.62751	0.103629	0.320063
piR-51756	GXN_555612	piR-hsa-14969	316.229	1.43821	0.883973	1.62698	0.103741	0.320093
piR-30888	GXN_540472	piR-hsa-1041	19.6259	-1.14624	0.707512	-1.62009	0.105212	0.322387
piR-40425	GXN_542118	piR-hsa-2564	46.8962	1.03626	0.638947	1.62182	0.104841	0.322387
piR-42529	GXN_544392	piR-hsa-4650	50.8814	0.906181	0.559134	1.62069	0.105085	0.322387
piR-32786	GXN_553469	piR-hsa-12997	28.8146	1.1884	0.733223	1.62079	0.105064	0.322387
piR-52974	GXN_556862	piR-hsa-16127	18.7733	-0.616397	0.37999	-1.62214	0.104774	0.322387
piR-57161	GXN_561447	piR-hsa-20302	46.6738	1.20808	0.745576	1.62033	0.105162	0.322387
piR-59299	GXN_563758	piR-hsa-22421	21.6824	-0.642676	0.396475	-1.62097	0.105023	0.322387
piR-47310	GXN_549665	piR-hsa-9496	155.507	0.951134	0.587732	1.61831	0.105595	0.323243
piR-45600	GXN_547777	piR-hsa-7762	32.6288	1.02101	0.632003	1.61552	0.106198	0.324768
piR-52009	GXN_555872	piR-hsa-15208	327.604	-1.10983	0.688498	-1.61196	0.106972	0.326169
piR-52205	GXN_556086	piR-hsa-15404	102.653	0.77001	0.477576	1.61233	0.106891	0.326169
piR-34992	GXN_568998	piR-hsa-27216	25.6356	1.05908	0.656677	1.61279	0.10679	0.326169
piR-43588	GXN_545581	piR-hsa-5754	113.203	-0.774317	0.481098	-1.60948	0.107512	0.327495
piR-43081	GXN_545066	piR-hsa-5275	22.91	0.976492	0.607605	1.60712	0.108029	0.328747
piR-46736	GXN_548967	piR-hsa-8851	208.029	1.10377	0.687106	1.6064	0.108186	0.328899
piR-40014	GXN_574360	piR-hsa-32142	789.293	1.35697	0.844977	1.60592	0.108291	0.328899
piR-35551	GXN_569561	piR-hsa-27731	26.8165	-0.649462	0.404662	-1.60495	0.108505	0.329227
piR-60610	GXN_566264	piR-hsa-24717	20.6775	1.16823	0.728524	1.60356	0.108811	0.329833
piR-58190	GXN_562598	piR-hsa-21357	21.4602	-0.95025	0.593031	-1.60236	0.109076	0.330313
piR-50537	GXN_554235	piR-hsa-13705	24.813	-0.682265	0.426131	-1.60107	0.109362	0.330534
piR-35574	GXN_569586	piR-hsa-27754	40.6163	-0.817155	0.510281	-1.60138	0.109292	0.330534
piR-45354	GXN_547523	piR-hsa-7532	36.8398	0.822695	0.514758	1.59822	0.109994	0.332123
piR-42458	GXN_542509	piR-hsa-2924	57.2891	-0.730575	0.457887	-1.59553	0.110593	0.33303
piR-42927	GXN_544931	piR-hsa-5150	27.8531	-0.875333	0.548651	-1.59543	0.110616	0.33303
piR-51761	GXN_555618	piR-hsa-14974	229.075	0.782161	0.490208	1.59557	0.110585	0.33303
piR-38473	GXN_572676	piR-hsa-30607	40.8708	-0.633576	0.397461	-1.59406	0.110922	0.333627
piR-45157	GXN_547338	piR-hsa-7364	47598.8	-0.367149	0.230439	-1.59326	0.111102	0.333845
piR-31432	GXN_541138	piR-hsa-1657	28.3775	-0.682395	0.42854	-1.59237	0.111302	0.33412
piR-58616	GXN_563048	piR-hsa-21768	38.4498	-1.00953	0.634298	-1.59157	0.111481	0.334336
piR-30926	GXN_540514	piR-hsa-1079	36.8317	-0.795459	0.500026	-1.59083	0.111647	0.33451
piR-38776	GXN_573112	piR-hsa-30996	19.304	0.7145	0.449357	1.59005	0.111824	0.334716
piR-37750	GXN_571931	piR-hsa-29912	22.9116	0.907719	0.571116	1.58938	0.111975	0.334846
piR-43864	GXN_545884	piR-hsa-6030	109.624	0.805056	0.506702	1.58882	0.112102	0.334903
piR-60489	GXN_566148	piR-hsa-24611	74.8987	-0.940882	0.592832	-1.5871	0.112491	0.335741
piR-43542	GXN_545531	piR-hsa-5708	1446.91	-0.785026	0.49512	-1.58552	0.112847	0.335933
piR-44883	GXN_547057	piR-hsa-7107	20.0484	0.773659	0.487847	1.58586	0.11277	0.335933
piR-37997	GXN_572180	piR-hsa-30145	25.6271	-0.919521	0.579999	-1.58538	0.11288	0.335933
piR-41658	GXN_543507	piR-hsa-3839	150.845	0.939005	0.592966	1.58357	0.113291	0.336834
piR-45350	GXN_547518	piR-hsa-7528	16.377	0.812945	0.513828	1.58213	0.113619	0.337486
piR-31115	GXN_540700	piR-hsa-1254	22623.6	1.26471	0.800543	1.57981	0.11415	0.337772
piR-33332	GXN_564916	piR-hsa-23483	17.1336	0.987666	0.624819	1.58072	0.113941	0.337772
piR-36241	GXN_570280	piR-hsa-28390	1077.63	-0.897664	0.568165	-1.57994	0.114122	0.337772
piR-39555	GXN_573912	piR-hsa-31730	67.9501	-0.60919	0.38533	-1.58096	0.113888	0.337772
piR-31338	GXN_541037	piR-hsa-1563	53.4058	1.33802	0.847692	1.57843	0.114468	0.338022
piR-32246	GXN_552768	piR-hsa-12358	35.3221	1.15341	0.730499	1.57893	0.114352	0.338022
piR-51320	GXN_555027	piR-hsa-14430	18.2144	1.39186	0.882031	1.57802	0.114562	0.338022
piR-42829	GXN_544826	piR-hsa-5052	33.1485	0.751326	0.476296	1.57743	0.114696	0.338096
piR-41530	GXN_543367	piR-hsa-3711	29.8898	-0.662485	0.420611	-1.57506	0.115244	0.338802
piR-53277	GXN_557146	piR-hsa-16386	28.3207	-1.03265	0.655453	-1.57547	0.115148	0.338802
piR-35591	GXN_569605	piR-hsa-27771	631.442	1.15755	0.734965	1.57497	0.115262	0.338802
piR-36707	GXN_570772	piR-hsa-28841	1107.27	-0.9168	0.582555	-1.57376	0.115544	0.339307
piR-30504	GXN_540069	piR-hsa-672	1650.72	-0.770891	0.490062	-1.57305	0.115708	0.339468
piR-31024	GXN_540602	piR-hsa-1163	18.7263	-0.916133	0.583466	-1.57016	0.116378	0.3407
piR-31654	GXN_541364	piR-hsa-1865	2884.01	-0.997343	0.636394	-1.56718	0.117073	0.3407
piR-40245	GXN_541924	piR-hsa-2384	29.5385	-0.635469	0.40498	-1.56914	0.116616	0.3407
piR-41618	GXN_543463	piR-hsa-3799	38.9927	-0.788844	0.502577	-1.5696	0.116509	0.3407
piR-41789	GXN_543634	piR-hsa-3956	19.8976	1.16087	0.740827	1.567	0.117115	0.3407
piR-47710	GXN_550065	piR-hsa-9867	39.5388	1.34011	0.854465	1.56836	0.116798	0.3407
piR-52994	GXN_555298	piR-hsa-14680	35.1773	-0.577894	0.36871	-1.56734	0.117036	0.3407
piR-60997	GXN_566780	piR-hsa-25191	100.371	-1.21364	0.772829	-1.57039	0.116325	0.3407
piR-35202	GXN_569228	piR-hsa-27426	17.5031	0.708702	0.452216	1.56718	0.117073	0.3407
piR-40760	GXN_542560	piR-hsa-2972	163.026	-0.566205	0.361497	-1.56628	0.117283	0.340868
piR-31059	GXN_540639	piR-hsa-1198	104.77	-0.836754	0.534649	-1.56505	0.117571	0.341064
piR-51838	GXN_555702	piR-hsa-15051	23.2076	0.875811	0.559597	1.56508	0.117565	0.341064
piR-39027	GXN_573386	piR-hsa-31247	89.9555	-0.561021	0.358646	-1.56428	0.117753	0.341275
piR-52207	GXN_556088	piR-hsa-15406	102.149	0.770756	0.493481	1.56188	0.118317	0.34231
piR-36981	GXN_571179	piR-hsa-29215	16.8755	-0.744288	0.476553	-1.56182	0.118331	0.34231
piR-41133	GXN_542953	piR-hsa-3329	402.871	-0.519431	0.332999	-1.55986	0.118794	0.343329
piR-35678	GXN_569699	piR-hsa-27857	19.0378	-0.740512	0.475426	-1.55758	0.119334	0.344569
piR-52199	GXN_556080	piR-hsa-15398	55.607	-0.757754	0.487011	-1.55593	0.119725	0.345378
piR-32284	GXN_552810	piR-hsa-12396	155.252	0.633157	0.407239	1.55475	0.120005	0.345863
piR-56655	GXN_560907	piR-hsa-19811	33258.7	-0.30392	0.195778	-1.55237	0.120573	0.347179
piR-41779	GXN_543623	piR-hsa-3946	104.067	0.471794	0.304278	1.55053	0.121014	0.348069
piR-34681	GXN_568576	piR-hsa-26831	53.5949	-0.760589	0.490656	-1.55015	0.121107	0.348069
piR-55942	GXN_560155	piR-hsa-19127	181.662	-0.809458	0.5224	-1.5495	0.121262	0.348194
piR-51669	GXN_555517	piR-hsa-14882	24.9007	0.8349	0.539817	1.54664	0.121951	0.349848
piR-51347	GXN_555057	piR-hsa-14457	35.5086	-0.780067	0.504848	-1.54515	0.122309	0.350229
piR-35176	GXN_569200	piR-hsa-27400	70.575	-0.794187	0.513912	-1.54538	0.122255	0.350229
piR-43859	GXN_545878	piR-hsa-6025	55.4953	-0.558898	0.362088	-1.54354	0.1227	0.350376
piR-57085	GXN_561364	piR-hsa-20226	20.4291	-0.815573	0.528536	-1.54308	0.122812	0.350376
piR-61803	GXN_567579	piR-hsa-25924	66.3665	0.889557	0.576153	1.54396	0.122598	0.350376
piR-39786	GXN_574144	piR-hsa-31944	17.5312	1.11323	0.720923	1.54418	0.122546	0.350376
piR-53160	GXN_557049	piR-hsa-16298	17.2506	0.869609	0.56431	1.54101	0.123314	0.351484
piR-40141	GXN_541843	piR-hsa-2309	24.7997	-0.728728	0.473324	-1.5396	0.123659	0.351607
piR-43927	GXN_545951	piR-hsa-6093	26.6618	-0.856476	0.556355	-1.53944	0.123697	0.351607
piR-48327	GXN_550709	piR-hsa-10455	33.7617	1.14403	0.742807	1.54015	0.123524	0.351607
piR-48889	GXN_551309	piR-hsa-11003	3094.08	0.822952	0.534897	1.53852	0.123921	0.351921
piR-39556	GXN_573913	piR-hsa-31731	67.3303	-0.603052	0.392294	-1.53725	0.124233	0.352486
piR-53702	GXN_557721	piR-hsa-16910	27.4266	1.13122	0.736259	1.53645	0.124428	0.352717
piR-53361	GXN_557238	piR-hsa-16470	23.1102	0.658937	0.429042	1.53583	0.124579	0.352823
piR-30188	GXN_539759	piR-hsa-385	23.7737	0.628756	0.409882	1.53399	0.125031	0.353457
piR-42464	GXN_542516	piR-hsa-2930	16.7966	0.711754	0.463939	1.53416	0.124991	0.353457
piR-54781	GXN_558847	piR-hsa-17945	273.771	-1.34911	0.879896	-1.53326	0.125212	0.353647
piR-57915	GXN_562314	piR-hsa-21099	20.6757	1.01332	0.66157	1.53168	0.125601	0.354423
piR-52495	GXN_556381	piR-hsa-15679	17.8852	1.27216	0.831545	1.52987	0.126048	0.355361
piR-51609	GXN_555452	piR-hsa-14822	51.1684	-0.711777	0.465972	-1.52751	0.126634	0.356481
piR-34457	GXN_568330	piR-hsa-26607	29.8826	0.421255	0.275808	1.52735	0.126675	0.356481
piR-30650	GXN_540228	piR-hsa-818	63.0402	1.1568	0.758345	1.52543	0.127152	0.357144
piR-30707	GXN_540275	piR-hsa-860	1964.19	1.07726	0.706584	1.52461	0.127357	0.357144
piR-42112	GXN_543986	piR-hsa-4277	34.9566	0.892621	0.585189	1.52536	0.127171	0.357144
piR-39455	GXN_573835	piR-hsa-31659	56.1023	0.446918	0.293147	1.52455	0.127371	0.357144
piR-55862	GXN_560067	piR-hsa-19047	41.4095	0.842274	0.552847	1.52352	0.127628	0.357544
piR-39795	GXN_574154	piR-hsa-31953	30.2043	-0.814719	0.53507	-1.52264	0.127849	0.357839
piR-31130	GXN_540715	piR-hsa-1269	57.5396	1.19203	0.78329	1.52182	0.128053	0.358087
piR-52079	GXN_555948	piR-hsa-15278	64.3516	0.719591	0.473181	1.52075	0.128322	0.358516
piR-42496	GXN_544356	piR-hsa-4617	17.7365	0.951937	0.62621	1.52016	0.128472	0.358611
piR-43207	GXN_545201	piR-hsa-5401	16.9771	1.21544	0.800384	1.51856	0.128872	0.358761
piR-61175	GXN_566959	piR-hsa-25353	23.3748	0.78306	0.515421	1.51926	0.128696	0.358761
piR-35393	GXN_569422	piR-hsa-27602	36.1038	0.873267	0.574889	1.51902	0.128758	0.358761
piR-42630	GXN_544501	piR-hsa-4751	24.3817	0.53914	0.35526	1.51759	0.129118	0.359123
piR-46305	GXN_548517	piR-hsa-8437	20.119	-0.855236	0.565017	-1.51365	0.130115	0.36125
piR-36376	GXN_570427	piR-hsa-28525	263.089	0.78811	0.520626	1.51377	0.130083	0.36125
piR-35106	GXN_569124	piR-hsa-27330	24.5186	0.809087	0.535675	1.51041	0.13094	0.363214
piR-30945	GXN_540519	piR-hsa-1084	21.406	-0.726986	0.481777	-1.50897	0.131307	0.363327
piR-43083	GXN_545068	piR-hsa-5277	16.2807	0.836478	0.554373	1.50887	0.131331	0.363327
piR-56436	GXN_560682	piR-hsa-19606	316.875	-0.564997	0.374299	-1.50948	0.131177	0.363327
piR-33470	GXN_565066	piR-hsa-23621	110.683	-0.583224	0.386857	-1.5076	0.131658	0.363906
piR-45887	GXN_548076	piR-hsa-8034	24.6034	-0.832203	0.553722	-1.50293	0.132858	0.366357
piR-58157	GXN_562562	piR-hsa-21324	86.5809	-0.976459	0.649774	-1.50277	0.132899	0.366357
piR-61534	GXN_567302	piR-hsa-25669	36.4426	-0.825641	0.549134	-1.50353	0.132702	0.366357
piR-33958	GXN_565585	piR-hsa-24094	41.6378	-0.524997	0.349962	-1.50015	0.133575	0.367893
piR-33051	GXN_564624	piR-hsa-23217	19.4911	0.716959	0.47818	1.49935	0.133783	0.368141
piR-30157	GXN_539741	piR-hsa-369	791.832	1.07849	0.720489	1.49689	0.134422	0.369243
piR-33614	GXN_565209	piR-hsa-23750	47.4803	0.807253	0.539233	1.49704	0.134383	0.369243
piR-39538	GXN_573893	piR-hsa-31713	86.8079	-0.577632	0.386506	-1.4945	0.135045	0.370628
piR-49269	GXN_551794	piR-hsa-11457	97.6895	-0.959475	0.642886	-1.49245	0.135581	0.371771
piR-38437	GXN_572639	piR-hsa-30571	33.0317	0.830207	0.557076	1.49029	0.136147	0.372993
piR-47808	GXN_550157	piR-hsa-9951	24.8988	-0.513438	0.34478	-1.48917	0.136442	0.37347
piR-44843	GXN_547013	piR-hsa-7067	120.002	-0.905282	0.608981	-1.48655	0.137133	0.374043
piR-32969	GXN_553666	piR-hsa-13180	38.7887	1.31005	0.880618	1.48764	0.136845	0.374043
piR-33324	GXN_564907	piR-hsa-23475	19.4665	-0.66304	0.445981	-1.4867	0.137094	0.374043
piR-36340	GXN_570388	piR-hsa-28489	999.303	-0.729502	0.490468	-1.48736	0.13692	0.374043
piR-61743	GXN_567529	piR-hsa-25878	24.3838	-0.607091	0.408663	-1.48555	0.137397	0.374434
piR-44141	GXN_546170	piR-hsa-6292	21.5743	-0.530178	0.357348	-1.48364	0.137903	0.374498
piR-33856	GXN_565473	piR-hsa-23992	38181.6	-0.876017	0.590142	-1.48442	0.137699	0.374498
piR-35984	GXN_570001	piR-hsa-28133	23.1988	1.0046	0.67678	1.48438	0.137707	0.374498
piR-37157	GXN_571370	piR-hsa-29391	79.592	0.8236	0.555093	1.48372	0.137884	0.374498
piR-42142	GXN_544019	piR-hsa-4307	29.5393	-0.436189	0.295004	-1.47858	0.139251	0.374908
piR-32828	GXN_553515	piR-hsa-13039	22.4557	0.774683	0.52411	1.47809	0.139383	0.374908
piR-52046	GXN_555912	piR-hsa-15245	17.1817	-0.659111	0.445264	-1.48027	0.138801	0.374908
piR-55399	GXN_559478	piR-hsa-18520	65.1243	-0.674617	0.456353	-1.47828	0.139333	0.374908
piR-56674	GXN_560928	piR-hsa-19830	50.1351	-0.422498	0.285791	-1.47835	0.139315	0.374908
piR-57516	GXN_561783	piR-hsa-20613	198.303	0.645768	0.435875	1.48154	0.138462	0.374908
piR-59290	GXN_563748	piR-hsa-22412	128.824	-0.943027	0.636617	-1.48131	0.138524	0.374908
piR-61200	GXN_566985	piR-hsa-25378	35.8699	-0.887308	0.599528	-1.48001	0.13887	0.374908
piR-34348	GXN_568212	piR-hsa-26498	112.839	-0.852476	0.57635	-1.47909	0.139115	0.374908
piR-35810	GXN_569827	piR-hsa-27974	28.9346	1.308	0.884406	1.47896	0.139152	0.374908
piR-39680	GXN_574044	piR-hsa-31854	16502.4	1.09961	0.742921	1.48012	0.138842	0.374908
piR-50218	GXN_553938	piR-hsa-13429	65.0406	-0.611128	0.413774	-1.47696	0.139686	0.375398
piR-46110	GXN_548320	piR-hsa-8257	43.321	-1.02131	0.693524	-1.47264	0.140848	0.377638
piR-54014	GXN_558043	piR-hsa-17208	144.65	-0.737841	0.501078	-1.47251	0.140884	0.377638
piR-33498	GXN_565097	piR-hsa-23649	22.6036	0.530209	0.359954	1.47299	0.140754	0.377638
piR-46162	GXN_548377	piR-hsa-8309	158.844	0.921742	0.62646	1.47135	0.141197	0.378148
piR-40795	GXN_542599	piR-hsa-3007	20.091	0.898255	0.610782	1.47066	0.141382	0.378214
piR-41641	GXN_543489	piR-hsa-3822	1374.06	-0.841668	0.572424	-1.47036	0.141465	0.378214
piR-30483	GXN_540046	piR-hsa-651	18.6085	-0.812671	0.553598	-1.46798	0.14211	0.378215
piR-42678	GXN_544554	piR-hsa-4799	18.2444	-0.631237	0.430097	-1.46766	0.142196	0.378215
piR-51422	GXN_555139	piR-hsa-14532	25.3877	0.687991	0.468432	1.46871	0.141911	0.378215
piR-51793	GXN_555653	piR-hsa-15006	215.068	-1.2064	0.82087	-1.46966	0.141654	0.378215
piR-57942	GXN_562343	piR-hsa-21126	50.7864	-0.709116	0.483128	-1.46776	0.14217	0.378215
piR-33754	GXN_565361	piR-hsa-23890	16.8148	-0.54108	0.368254	-1.46931	0.141748	0.378215
piR-46580	GXN_548815	piR-hsa-8709	25.2034	0.805063	0.549434	1.46526	0.14285	0.379629
piR-37239	GXN_571426	piR-hsa-29444	16.1776	-0.68437	0.467497	-1.4639	0.14322	0.380287
piR-41752	GXN_543594	piR-hsa-3919	131.839	-0.407326	0.278992	-1.45999	0.144292	0.382455
piR-41973	GXN_543834	piR-hsa-4138	278.146	-0.685594	0.469865	-1.45913	0.14453	0.382455
piR-42247	GXN_544115	piR-hsa-4397	25.3839	0.707996	0.485179	1.45925	0.144497	0.382455
piR-43593	GXN_545587	piR-hsa-5759	8524.55	-1.06023	0.72651	-1.45934	0.144471	0.382455
piR-30589	GXN_540161	piR-hsa-757	22.5127	0.839897	0.576327	1.45733	0.145026	0.383442
piR-31961	GXN_541648	piR-hsa-2129	931.564	-0.660314	0.453255	-1.45683	0.145164	0.38348
piR-61761	GXN_566488	piR-hsa-24923	20.2057	0.783496	0.538258	1.45561	0.145499	0.384039
piR-33931	GXN_565556	piR-hsa-24067	16.5211	0.804926	0.55318	1.45509	0.145645	0.384096
piR-34810	GXN_568702	piR-hsa-26946	268.73	-0.817311	0.561968	-1.45437	0.145843	0.384291
piR-56132	GXN_560348	piR-hsa-19302	19.6185	0.943789	0.650117	1.45172	0.146579	0.385905
piR-44578	GXN_546626	piR-hsa-6714	23.2289	-0.618892	0.427306	-1.44836	0.147516	0.387387
piR-49451	GXN_551990	piR-hsa-11639	21.5967	0.645695	0.445599	1.44905	0.147324	0.387387
piR-33806	GXN_565418	piR-hsa-23942	205.057	-0.632469	0.436568	-1.44873	0.147413	0.387387
piR-31712	GXN_540825	piR-hsa-1370	166.322	-0.955009	0.659577	-1.44791	0.147642	0.387388
piR-41159	GXN_542981	piR-hsa-3355	107.958	-0.779078	0.538877	-1.44574	0.148249	0.388122
piR-57755	GXN_562044	piR-hsa-20852	1163.01	-0.526282	0.364064	-1.44557	0.148297	0.388122
piR-33081	GXN_564657	piR-hsa-23247	861.534	-0.561367	0.388237	-1.44594	0.148194	0.388122
piR-42689	GXN_544566	piR-hsa-4810	38024.9	0.907833	0.629098	1.44307	0.149	0.389308
piR-34386	GXN_568254	piR-hsa-26536	67.333	-0.517274	0.358365	-1.44343	0.1489	0.389308
piR-55571	GXN_559763	piR-hsa-18772	49.3263	1.17731	0.816287	1.44227	0.149227	0.389571
piR-43712	GXN_545717	piR-hsa-5878	43.6746	-1.05908	0.734848	-1.44123	0.149521	0.390011
piR-52341	GXN_556231	piR-hsa-15540	54.6643	-0.556875	0.386874	-1.43942	0.150031	0.390707
piR-33169	GXN_564752	piR-hsa-23335	30.1495	-0.602969	0.418905	-1.43939	0.150039	0.390707
piR-57664	GXN_561944	piR-hsa-20761	22.1499	-0.621487	0.431947	-1.4388	0.150206	0.390813
piR-50435	GXN_554156	piR-hsa-13632	48.5804	1.04075	0.724814	1.43589	0.151033	0.392636
piR-56497	GXN_559630	piR-hsa-18653	17.4126	0.718047	0.500415	1.4349	0.151314	0.393038
piR-40982	GXN_542787	piR-hsa-3178	821.491	-0.663937	0.46289	-1.43433	0.151478	0.393133
piR-41209	GXN_543035	piR-hsa-3405	965.474	0.830569	0.579719	1.43271	0.151941	0.394006
piR-57466	GXN_561744	piR-hsa-20578	87.0743	0.445587	0.311587	1.43006	0.1527	0.395644
piR-30511	GXN_540077	piR-hsa-679	17.9472	1.02973	0.72131	1.42758	0.153412	0.397157
piR-30044	GXN_539620	piR-hsa-256	36.9259	-0.61605	0.431743	-1.42689	0.153612	0.397344
piR-39819	GXN_574179	piR-hsa-31977	209.266	0.844499	0.592118	1.42623	0.153801	0.3975
piR-52335	GXN_556225	piR-hsa-15534	29.8214	1.01691	0.713544	1.42516	0.154112	0.397642
piR-35197	GXN_569223	piR-hsa-27421	17.618	-0.671558	0.471151	-1.42535	0.154055	0.397642
piR-44719	GXN_546764	piR-hsa-6840	19.2412	-0.808328	0.567433	-1.42453	0.154292	0.397776
piR-31352	GXN_541053	piR-hsa-1577	220.724	-0.74053	0.521139	-1.42099	0.155321	0.397855
piR-46055	GXN_548260	piR-hsa-8202	26.5864	0.786464	0.553271	1.42148	0.155177	0.397855
piR-47535	GXN_549875	piR-hsa-9692	20.7227	0.994764	0.699821	1.42146	0.155184	0.397855
piR-49235	GXN_551433	piR-hsa-11117	76.4901	-0.656381	0.462096	-1.42044	0.155479	0.397855
piR-32079	GXN_552607	piR-hsa-12206	891.449	-0.664559	0.46777	-1.4207	0.155405	0.397855
piR-32135	GXN_552665	piR-hsa-12262	43.4489	1.14506	0.804956	1.42251	0.154878	0.397855
piR-54967	GXN_559051	piR-hsa-18131	24.4294	0.920787	0.64831	1.42029	0.155524	0.397855
piR-56197	GXN_560419	piR-hsa-19367	40.9676	-0.777205	0.547832	-1.41869	0.155989	0.397855
piR-57302	GXN_561567	piR-hsa-20414	19.0941	0.898524	0.633165	1.4191	0.15587	0.397855
piR-34531	GXN_568411	piR-hsa-26681	94.1565	-0.673554	0.474432	-1.41971	0.155693	0.397855
piR-34653	GXN_568545	piR-hsa-26803	63.7018	-0.620349	0.437199	-1.41892	0.155923	0.397855
piR-34811	GXN_568703	piR-hsa-26947	59.1333	-0.861997	0.606784	-1.4206	0.155433	0.397855
piR-35674	GXN_569694	piR-hsa-27853	28.3463	0.88857	0.62574	1.42003	0.155599	0.397855
piR-31701	GXN_540813	piR-hsa-1359	75.0857	-0.537511	0.380002	-1.4145	0.157216	0.400655
piR-33804	GXN_565416	piR-hsa-23940	47.0275	0.704635	0.498873	1.41245	0.157817	0.401199
piR-35000	GXN_569007	piR-hsa-27224	37.3649	1.02588	0.725998	1.41307	0.157636	0.401199
piR-37348	GXN_571543	piR-hsa-29553	19.4915	-0.78415	0.555169	-1.41245	0.157817	0.401199
piR-61351	GXN_567118	piR-hsa-25500	19.5151	-0.757916	0.537218	-1.41082	0.158299	0.402095
piR-36318	GXN_570364	piR-hsa-28467	244.353	-0.606016	0.429877	-1.40974	0.158616	0.40257
piR-33783	GXN_565393	piR-hsa-23919	1040.74	-0.687491	0.488088	-1.40854	0.158972	0.403144
piR-41313	GXN_543134	piR-hsa-3494	87.4736	0.584599	0.415559	1.40678	0.159494	0.403808
piR-47865	GXN_550220	piR-hsa-10008	225.87	-0.59294	0.421389	-1.40711	0.159395	0.403808
piR-31447	GXN_540790	piR-hsa-1338	1708.09	-0.481221	0.342582	-1.40469	0.160114	0.404989
piR-36755	GXN_570822	piR-hsa-28889	101.314	1.11773	0.795921	1.40433	0.160221	0.404989
piR-44507	GXN_546551	piR-hsa-6643	235.518	-1.07639	0.766767	-1.4038	0.160379	0.405059
piR-39833	GXN_574194	piR-hsa-31991	20.7153	-0.783766	0.558525	-1.40328	0.160534	0.40512
piR-56619	GXN_560867	piR-hsa-19775	37.0419	0.612636	0.436773	1.40264	0.160723	0.405268
piR-36035	GXN_570057	piR-hsa-28184	49.9523	-0.83301	0.594286	-1.4017	0.161005	0.40565
piR-56038	GXN_560244	piR-hsa-19208	17.8657	0.705513	0.503655	1.40079	0.161278	0.406007
piR-58394	GXN_562806	piR-hsa-21547	33.4386	-0.922643	0.658871	-1.40034	0.161412	0.406015
piR-49973	GXN_552507	piR-hsa-12115	48.7199	-0.507569	0.362676	-1.39951	0.16166	0.406246
piR-34447	GXN_568320	piR-hsa-26597	42.1766	0.594405	0.424831	1.39916	0.161766	0.406246
piR-40295	GXN_541978	piR-hsa-2434	199.118	-1.07916	0.772245	-1.39743	0.162285	0.40722
piR-60738	GXN_566403	piR-hsa-24845	34.3561	-0.80985	0.579717	-1.39698	0.162421	0.407233
piR-42953	GXN_544960	piR-hsa-5176	27.7113	-0.42085	0.301675	-1.39504	0.163002	0.408361
piR-30944	GXN_540518	piR-hsa-1083	68.4446	1.22555	0.879137	1.39404	0.163305	0.408789
piR-35250	GXN_569265	piR-hsa-27459	44.3203	-0.832678	0.600377	-1.38693	0.165465	0.413528
piR-36712	GXN_570777	piR-hsa-28846	1253.13	1.02405	0.7382	1.38722	0.165374	0.413528
piR-60051	GXN_565671	piR-hsa-24173	18.1362	0.670987	0.484153	1.3859	0.165778	0.413978
piR-52394	GXN_556288	piR-hsa-15593	57.5724	0.793391	0.573039	1.38453	0.166195	0.41464
piR-58702	GXN_563142	piR-hsa-21854	47.6691	-0.779182	0.562928	-1.38416	0.16631	0.41464
piR-32424	GXN_552962	piR-hsa-12535	131.028	0.866303	0.62617	1.38349	0.166513	0.414813
piR-47237	GXN_549586	piR-hsa-9423	33.979	1.02475	0.741548	1.38191	0.166999	0.415688
piR-47266	GXN_549618	piR-hsa-9452	35.967	-0.865653	0.627228	-1.38012	0.167549	0.416724
piR-45371	GXN_547542	piR-hsa-7549	21403.8	-0.938973	0.680852	-1.37911	0.16786	0.417163
piR-32285	GXN_552811	piR-hsa-12397	60.929	0.837548	0.609091	1.37508	0.169107	0.419568
piR-56802	GXN_561069	piR-hsa-19958	26.8794	-0.441027	0.320715	-1.37514	0.169089	0.419568
piR-57661	GXN_561941	piR-hsa-20758	151.058	0.781655	0.568612	1.37467	0.169233	0.419568
piR-58126	GXN_562528	piR-hsa-21293	27.9625	0.748282	0.545645	1.37137	0.170259	0.421776
piR-30799	GXN_540375	piR-hsa-952	15870.2	-0.474304	0.347163	-1.36623	0.171866	0.42369
piR-41620	GXN_543465	piR-hsa-3801	20.1126	-0.590356	0.432087	-1.36629	0.171847	0.42369
piR-42767	GXN_544759	piR-hsa-4990	21.4958	0.727028	0.531445	1.36802	0.171306	0.42369
piR-43061	GXN_545044	piR-hsa-5255	159.932	-0.75293	0.55091	-1.3667	0.171719	0.42369
piR-51487	GXN_555210	piR-hsa-14597	23.4829	0.78558	0.57571	1.36454	0.172397	0.42369
piR-52343	GXN_556233	piR-hsa-15542	110.412	0.910092	0.66583	1.36685	0.171671	0.42369
piR-54700	GXN_558774	piR-hsa-17878	75.4737	-0.561717	0.411639	-1.36459	0.172383	0.42369
piR-60647	GXN_566304	piR-hsa-24754	318.553	-0.700396	0.51323	-1.36468	0.172353	0.42369
piR-61906	GXN_567692	piR-hsa-26026	28.4521	-0.554997	0.40654	-1.36517	0.172199	0.42369
piR-39764	GXN_574119	piR-hsa-31922	23.4807	1.10072	0.806231	1.36527	0.172167	0.42369
piR-38276	GXN_572465	piR-hsa-30410	59.7857	0.913364	0.669702	1.36384	0.172619	0.4239
piR-30111	GXN_539693	piR-hsa-323	154.943	0.925454	0.680056	1.36085	0.173561	0.425877
piR-47436	GXN_549800	piR-hsa-9622	599.9	1.08369	0.7973	1.3592	0.174084	0.426822
piR-41874	GXN_543728	piR-hsa-4041	43.4072	1.18613	0.874006	1.35711	0.174745	0.427395
piR-42938	GXN_544943	piR-hsa-5161	322.438	-0.6722	0.495569	-1.35642	0.174965	0.427395
piR-49874	GXN_552400	piR-hsa-12016	77.0804	-0.965739	0.712184	-1.35602	0.175091	0.427395
piR-55137	GXN_559206	piR-hsa-18272	17.1755	-0.514641	0.379493	-1.35613	0.175059	0.427395
piR-35822	GXN_569840	piR-hsa-27986	27.2582	-0.707841	0.522061	-1.35586	0.175144	0.427395
piR-35950	GXN_569980	piR-hsa-28114	17.8752	-0.597921	0.440857	-1.35627	0.175013	0.427395
piR-45167	GXN_547349	piR-hsa-7374	26.9958	0.493421	0.365042	1.35169	0.176476	0.429913
piR-47050	GXN_549402	piR-hsa-9251	3548.94	-0.518661	0.383939	-1.35089	0.17673	0.429913
piR-56676	GXN_560930	piR-hsa-19832	21.8498	-0.498929	0.368988	-1.35216	0.176326	0.429913
piR-33543	GXN_565131	piR-hsa-23679	197.61	-0.440683	0.326165	-1.35111	0.176662	0.429913
piR-52414	GXN_556310	piR-hsa-15613	26.8028	-0.558168	0.413448	-1.35003	0.177006	0.430248
piR-56119	GXN_560333	piR-hsa-19289	39.9348	0.662301	0.490746	1.34958	0.177151	0.430263
piR-37198	GXN_571413	piR-hsa-29432	18.6171	-0.672057	0.498298	-1.34871	0.177431	0.430608
piR-50926	GXN_554644	piR-hsa-14080	91.2842	1.11067	0.82391	1.34805	0.177642	0.430781
piR-48202	GXN_550572	piR-hsa-10330	40.1026	-0.761293	0.565414	-1.34643	0.178163	0.431707
piR-41059	GXN_542871	piR-hsa-3255	17.6818	-0.691223	0.513906	-1.34504	0.178613	0.431788
piR-42886	GXN_544886	piR-hsa-5109	40.2454	-0.665137	0.49429	-1.34564	0.178418	0.431788
piR-43583	GXN_545576	piR-hsa-5749	21.8942	0.910013	0.676468	1.34524	0.178547	0.431788
piR-51742	GXN_555597	piR-hsa-14955	38.7079	0.533057	0.396759	1.34353	0.179101	0.432368
piR-57125	GXN_561408	piR-hsa-20266	17232.3	0.660163	0.4914	1.34343	0.179132	0.432368
piR-34121	GXN_567979	piR-hsa-26287	28.0438	-0.572262	0.426191	-1.34274	0.179358	0.432577
piR-53867	GXN_557884	piR-hsa-17061	31.4207	0.43277	0.32332	1.33852	0.180727	0.435541
piR-39326	GXN_573696	piR-hsa-31530	22.6449	-0.694002	0.51915	-1.3368	0.181287	0.43655
piR-50444	GXN_554166	piR-hsa-13641	229.563	0.760975	0.569509	1.3362	0.181486	0.436691
piR-37061	GXN_571266	piR-hsa-29295	128.699	-0.641529	0.480738	-1.33447	0.182051	0.437712
piR-31468	GXN_541161	piR-hsa-1679	17.7681	0.93263	0.699375	1.33352	0.182361	0.437865
piR-31499	GXN_541195	piR-hsa-1710	1635.85	-0.783343	0.587608	-1.3331	0.182497	0.437865
piR-42338	GXN_544215	piR-hsa-4488	60.0839	0.786169	0.589783	1.33298	0.182538	0.437865
piR-36804	GXN_570875	piR-hsa-28938	17.5566	-0.655945	0.492771	-1.33114	0.183144	0.43898
piR-44552	GXN_546598	piR-hsa-6688	299.395	0.566025	0.425915	1.32896	0.18386	0.440356
piR-30433	GXN_539460	piR-hsa-177	105.919	-1.04723	0.788617	-1.32793	0.184202	0.440834
piR-60366	GXN_566014	piR-hsa-24488	36.1318	0.427418	0.322178	1.32665	0.184625	0.441506
piR-31479	GXN_541173	piR-hsa-1690	27.1431	0.81199	0.614012	1.32243	0.186024	0.441972
piR-41765	GXN_543608	piR-hsa-3932	56.4528	-0.4919	0.371696	-1.32339	0.185704	0.441972
piR-41943	GXN_543802	piR-hsa-4108	60.6661	0.583118	0.440445	1.32393	0.185527	0.441972
piR-44957	GXN_547138	piR-hsa-7181	21.1452	-0.892829	0.675478	-1.32177	0.186243	0.441972
piR-55553	GXN_559743	piR-hsa-18754	40.686	-0.821716	0.6202	-1.32492	0.185197	0.441972
piR-60265	GXN_565903	piR-hsa-24387	21.2015	-0.635344	0.479767	-1.32428	0.185412	0.441972
piR-60993	GXN_566776	piR-hsa-25187	17.642	-0.630542	0.476892	-1.32219	0.186104	0.441972
piR-34375	GXN_568242	piR-hsa-26525	1410.6	-0.725447	0.548696	-1.32213	0.186125	0.441972
piR-35166	GXN_569189	piR-hsa-27390	24.4951	0.512787	0.387338	1.32388	0.185544	0.441972
piR-35643	GXN_569661	piR-hsa-27822	280.321	-0.854492	0.646023	-1.3227	0.185937	0.441972
piR-54257	GXN_558292	piR-hsa-17436	45.7673	0.656388	0.497153	1.32029	0.186737	0.442213
piR-55053	GXN_559114	piR-hsa-18188	36.2989	-0.755107	0.571814	-1.32054	0.186653	0.442213
piR-59320	GXN_563781	piR-hsa-22442	23.0089	-0.474027	0.359114	-1.31999	0.186838	0.442213
piR-34373	GXN_568239	piR-hsa-26523	1421.75	-0.723598	0.54828	-1.31976	0.186915	0.442213
piR-31445	GXN_540788	piR-hsa-1336	364.955	0.85155	0.646425	1.31732	0.18773	0.443768
piR-47442	GXN_549806	piR-hsa-9628	30.4836	-0.720984	0.547468	-1.31694	0.187858	0.443768
piR-31638	GXN_541346	piR-hsa-1849	12192.1	-0.835578	0.635268	-1.31532	0.188404	0.444381
piR-43839	GXN_545856	piR-hsa-6005	61.7792	-0.524501	0.398642	-1.31572	0.188268	0.444381
piR-52617	GXN_556511	piR-hsa-15801	271.071	-0.6326	0.48115	-1.31477	0.188588	0.444478
piR-56285	GXN_560516	piR-hsa-19455	18.1886	0.584177	0.444835	1.31325	0.1891	0.445347
piR-38251	GXN_572438	piR-hsa-30385	18.5037	-0.644488	0.491996	-1.30995	0.190214	0.44763
piR-58125	GXN_562527	piR-hsa-21292	17.1969	-0.585328	0.44708	-1.30922	0.190458	0.447866
piR-57959	GXN_562361	piR-hsa-21142	22.0926	-0.58514	0.447693	-1.30701	0.191208	0.448205
piR-61230	GXN_567018	piR-hsa-25408	64.655	0.758997	0.580826	1.30676	0.191296	0.448205
piR-36174	GXN_570208	piR-hsa-28323	81.1533	0.495051	0.378864	1.30667	0.191325	0.448205
piR-36248	GXN_570288	piR-hsa-28397	64.4528	-0.585194	0.447331	-1.30819	0.190808	0.448205
piR-37611	GXN_571811	piR-hsa-29802	29.9222	0.602071	0.460489	1.30746	0.191056	0.448205
piR-31637	GXN_541345	piR-hsa-1848	12177.4	-0.830897	0.636372	-1.30568	0.191662	0.448657
piR-30443	GXN_539471	piR-hsa-187	75.1578	-0.667919	0.51208	-1.30433	0.192123	0.448751
piR-31703	GXN_540815	piR-hsa-1361	794117	-0.895232	0.68727	-1.30259	0.192714	0.448751
piR-31900	GXN_541596	piR-hsa-2082	20.1856	0.549721	0.421854	1.30311	0.192538	0.448751
piR-42563	GXN_544430	piR-hsa-4684	42.9647	0.751227	0.576549	1.30297	0.192584	0.448751
piR-45335	GXN_547502	piR-hsa-7513	45.1726	0.927456	0.711062	1.30432	0.192123	0.448751
piR-32633	GXN_553191	piR-hsa-12744	59.6678	-0.774243	0.59423	-1.30293	0.192597	0.448751
piR-36513	GXN_570560	piR-hsa-28648	22.1203	1.0289	0.788968	1.30411	0.192197	0.448751
piR-48777	GXN_551188	piR-hsa-10891	16.4151	-0.442564	0.339994	-1.30168	0.193025	0.448877
piR-55569	GXN_559760	piR-hsa-18770	116.604	0.989924	0.760552	1.30159	0.193058	0.448877
piR-33326	GXN_564909	piR-hsa-23477	63.7316	-0.409528	0.314966	-1.30023	0.193521	0.449619
piR-30498	GXN_540062	piR-hsa-666	34.2715	-0.767341	0.591547	-1.29718	0.194571	0.451719
piR-40586	GXN_542277	piR-hsa-2710	21.1817	-0.50246	0.387771	-1.29576	0.195057	0.452421
piR-33748	GXN_565354	piR-hsa-23884	20346.4	-0.91121	0.703622	-1.29503	0.195311	0.452421
piR-36150	GXN_570182	piR-hsa-28299	13319.3	-0.807223	0.623147	-1.2954	0.195183	0.452421
piR-43998	GXN_546013	piR-hsa-6149	16.2455	-0.999329	0.772529	-1.29358	0.19581	0.45324
piR-58172	GXN_562579	piR-hsa-21339	29.3949	0.574083	0.44446	1.29164	0.196482	0.454131
piR-36383	GXN_570434	piR-hsa-28532	235.016	-0.577008	0.446731	-1.29162	0.196488	0.454131
piR-52655	GXN_556552	piR-hsa-15838	45.7563	0.922135	0.714325	1.29092	0.196732	0.454357
piR-49447	GXN_551985	piR-hsa-11635	16.7838	0.771544	0.59831	1.28954	0.197211	0.455124
piR-30859	GXN_540441	piR-hsa-1012	29.5925	-0.612187	0.47539	-1.28776	0.197831	0.455201
piR-44979	GXN_546794	piR-hsa-6867	24.8787	-0.587528	0.455962	-1.28854	0.197557	0.455201
piR-54607	GXN_558672	piR-hsa-17785	37.0241	1.03413	0.802825	1.28811	0.197708	0.455201
piR-38427	GXN_572628	piR-hsa-30561	61.7872	0.882993	0.685662	1.2878	0.197817	0.455201
piR-50754	GXN_554455	piR-hsa-13908	25.9312	0.853633	0.663423	1.28671	0.198195	0.455365
piR-33535	GXN_565122	piR-hsa-23671	4497.67	-0.915708	0.711498	-1.28701	0.198089	0.455365
piR-60791	GXN_566557	piR-hsa-24985	40.9988	-0.490439	0.381557	-1.28536	0.198665	0.456108
piR-47457	GXN_549821	piR-hsa-9643	39.4977	-0.509352	0.39708	-1.28274	0.199582	0.457873
piR-51631	GXN_555477	piR-hsa-14844	28.8792	0.900774	0.702525	1.2822	0.199774	0.457976
piR-31783	GXN_541471	piR-hsa-1965	24.062	-0.583874	0.45625	-1.27972	0.200642	0.45861
piR-41394	GXN_543223	piR-hsa-3575	19.8802	-0.951805	0.743651	-1.27991	0.200577	0.45861
piR-49979	GXN_552513	piR-hsa-12121	22.1708	0.616657	0.481666	1.28026	0.200454	0.45861
piR-34673	GXN_568567	piR-hsa-26823	18.9453	0.556605	0.434639	1.28062	0.200328	0.45861
piR-55267	GXN_559333	piR-hsa-18388	21.4162	-0.861005	0.673063	-1.27923	0.200815	0.458667
piR-58792	GXN_563225	piR-hsa-21929	17.1435	0.828252	0.648403	1.27737	0.201471	0.459827
piR-42234	GXN_544101	piR-hsa-4384	19.3122	0.600606	0.470847	1.27559	0.202101	0.46092
piR-51365	GXN_555077	piR-hsa-14475	54.0451	-0.862593	0.676449	-1.27518	0.202246	0.46092
piR-30294	GXN_539874	piR-hsa-491	16.415	0.966531	0.759005	1.27342	0.20287	0.461291
piR-30652	GXN_540231	piR-hsa-820	6054.25	-0.74098	0.581788	-1.27362	0.202797	0.461291
piR-54145	GXN_558187	piR-hsa-17339	22.4092	0.556525	0.437162	1.27304	0.203004	0.461291
piR-60869	GXN_566640	piR-hsa-25063	97.278	-0.658124	0.516707	-1.27369	0.202774	0.461291
piR-54036	GXN_558067	piR-hsa-17230	18.4264	0.888834	0.698648	1.27222	0.203295	0.461541
piR-39765	GXN_574121	piR-hsa-31923	17.5376	-0.644429	0.50667	-1.27189	0.203411	0.461541
piR-44468	GXN_544695	piR-hsa-4930	58.7474	0.49834	0.392458	1.26979	0.204159	0.462899
piR-32230	GXN_552766	piR-hsa-12356	87.0322	-0.334994	0.264027	-1.26879	0.204517	0.463373
piR-45759	GXN_547936	piR-hsa-7906	27.0278	0.439408	0.347203	1.26557	0.205669	0.464992
piR-51888	GXN_555756	piR-hsa-15101	140.098	0.67543	0.533911	1.26506	0.205849	0.464992
piR-53553	GXN_557559	piR-hsa-16761	91.1008	0.950921	0.751497	1.26537	0.205739	0.464992
piR-54774	GXN_558839	piR-hsa-17938	272.096	-0.451019	0.356275	-1.26593	0.205539	0.464992
piR-38471	GXN_572674	piR-hsa-30605	20.9085	0.805587	0.636981	1.26469	0.205981	0.464992
piR-42977	GXN_544625	piR-hsa-4865	55.5175	-0.780603	0.617912	-1.26329	0.206485	0.465791
piR-31162	GXN_540751	piR-hsa-1301	60.0272	-0.497552	0.395224	-1.25891	0.208062	0.469009
piR-48390	GXN_550778	piR-hsa-10518	107.876	0.825656	0.65696	1.25678	0.208833	0.470063
piR-55213	GXN_559290	piR-hsa-18348	47.0872	-0.499022	0.397033	-1.25688	0.208798	0.470063
piR-33879	GXN_565498	piR-hsa-24015	46248.9	-0.716165	0.570539	-1.25524	0.20939	0.470976
piR-34753	GXN_568639	piR-hsa-26889	33.1994	0.569979	0.454637	1.2537	0.20995	0.471894
piR-54535	GXN_558593	piR-hsa-17713	30.0387	0.489953	0.390967	1.25318	0.21014	0.471978
piR-30832	GXN_540412	piR-hsa-985	16.5185	0.698421	0.55771	1.2523	0.21046	0.472349
piR-33636	GXN_565232	piR-hsa-23772	37.0967	-0.589263	0.470698	-1.25189	0.210609	0.472349
piR-56342	GXN_560579	piR-hsa-19512	22.9538	-0.58422	0.467121	-1.25068	0.21105	0.472997
piR-52836	GXN_556713	piR-hsa-15989	29.1137	0.686017	0.549347	1.24879	0.211743	0.474207
piR-30230	GXN_539805	piR-hsa-427	21.462	-0.954182	0.764381	-1.24831	0.211919	0.474258
piR-51746	GXN_555601	piR-hsa-14959	68.0113	0.351523	0.281725	1.24775	0.212121	0.474369
piR-46944	GXN_549193	piR-hsa-9059	77.0343	0.753474	0.604135	1.24719	0.212326	0.474486
piR-31496	GXN_541192	piR-hsa-1707	49.3739	0.831534	0.668001	1.24481	0.213202	0.4761
piR-60412	GXN_566065	piR-hsa-24534	54.1677	-0.724793	0.58265	-1.24396	0.213514	0.476454
piR-55173	GXN_559246	piR-hsa-18308	195.807	-0.783033	0.629783	-1.24334	0.213743	0.476622
piR-31109	GXN_540693	piR-hsa-1248	24.6726	0.696007	0.560123	1.2426	0.214017	0.47689
piR-33504	GXN_564276	piR-hsa-22899	16.6732	0.673688	0.543025	1.24062	0.214746	0.47749
piR-60428	GXN_566081	piR-hsa-24550	623.879	-0.721822	0.581597	-1.2411	0.214568	0.47749
piR-36329	GXN_570376	piR-hsa-28478	1774.99	0.733433	0.591184	1.24062	0.214748	0.47749
piR-49586	GXN_552122	piR-hsa-11759	174.061	-0.654528	0.527768	-1.24018	0.214908	0.477505
piR-30676	GXN_540257	piR-hsa-844	31.8117	0.81712	0.660839	1.23649	0.216277	0.478833
piR-43325	GXN_545312	piR-hsa-5505	65.7328	0.660634	0.533604	1.23806	0.215694	0.478833
piR-45315	GXN_547480	piR-hsa-7493	17.2376	-0.48836	0.394593	-1.23763	0.215853	0.478833
piR-32824	GXN_553511	piR-hsa-13035	34.3164	0.53138	0.429645	1.23679	0.216166	0.478833
piR-61080	GXN_566855	piR-hsa-25259	90.2086	-0.827134	0.668627	-1.23706	0.216063	0.478833
piR-43897	GXN_545918	piR-hsa-6063	16.1415	0.671354	0.543445	1.23537	0.216694	0.479154
piR-50167	GXN_553883	piR-hsa-13378	22.9269	0.774659	0.627119	1.23527	0.216731	0.479154
piR-51891	GXN_555759	piR-hsa-15104	18.7116	0.557199	0.451686	1.2336	0.217353	0.479478
piR-54261	GXN_558297	piR-hsa-17440	19.6202	-0.533018	0.432153	-1.2334	0.217426	0.479478
piR-60689	GXN_566350	piR-hsa-24796	23.9124	0.604299	0.490019	1.23322	0.217495	0.479478
piR-36717	GXN_570782	piR-hsa-28851	1292.45	-0.842442	0.682826	-1.23376	0.217293	0.479478
piR-38715	GXN_572935	piR-hsa-30849	21.9639	0.52773	0.428223	1.23237	0.21781	0.47983
piR-38141	GXN_572335	piR-hsa-30289	683.457	0.522789	0.424439	1.23172	0.218055	0.48003
piR-48180	GXN_550547	piR-hsa-10308	100.247	-0.753655	0.612809	-1.22984	0.218758	0.480555
piR-34341	GXN_568204	piR-hsa-26491	23.4809	-0.502387	0.408325	-1.23036	0.218562	0.480555
piR-37201	GXN_571416	piR-hsa-29435	17.746	0.766733	0.623287	1.23015	0.218643	0.480555
piR-42449	GXN_542500	piR-hsa-2915	21.1502	-0.451981	0.368211	-1.22751	0.219632	0.481794
piR-56444	GXN_560691	piR-hsa-19614	30.5375	-0.466843	0.38029	-1.2276	0.219599	0.481794
piR-45638	GXN_547819	piR-hsa-7800	45.378	-0.562072	0.458677	-1.22542	0.220418	0.481815
piR-48373	GXN_550760	piR-hsa-10501	28.6572	0.719668	0.586803	1.22642	0.22004	0.481815
piR-56815	GXN_561083	piR-hsa-19971	19.2942	0.488718	0.398645	1.22595	0.220219	0.481815
piR-34291	GXN_568150	piR-hsa-26441	4796.16	-0.655167	0.534205	-1.22643	0.220035	0.481815
piR-34657	GXN_568550	piR-hsa-26807	18.7991	-0.806994	0.658349	-1.22578	0.22028	0.481815
piR-33385	GXN_564974	piR-hsa-23536	19.1872	0.682702	0.558104	1.22325	0.221234	0.482919
piR-33919	GXN_565542	piR-hsa-24055	63.8044	1.00373	0.820293	1.22362	0.221095	0.482919
piR-42029	GXN_543894	piR-hsa-4194	7888.14	-0.775532	0.63492	-1.22147	0.22191	0.483959
piR-39161	GXN_573531	piR-hsa-31380	58.494	-0.604795	0.495259	-1.22117	0.222022	0.483959
piR-32764	GXN_553445	piR-hsa-12975	66.2917	-0.538801	0.441934	-1.21919	0.222773	0.484573
piR-33686	GXN_565287	piR-hsa-23822	367.26	-0.375168	0.307647	-1.21948	0.222663	0.484573
piR-33969	GXN_565597	piR-hsa-24105	35.7032	-0.416683	0.341715	-1.21939	0.222698	0.484573
piR-38354	GXN_572550	piR-hsa-30488	23.4018	0.760149	0.623815	1.21855	0.223016	0.484763
piR-34857	GXN_568754	piR-hsa-26993	88.1446	0.750906	0.617213	1.21661	0.223753	0.486025
piR-35293	GXN_569312	piR-hsa-27502	50.6841	-0.510562	0.420243	-1.21492	0.224396	0.487081
piR-56399	GXN_560641	piR-hsa-19569	118.223	1.06957	0.880976	1.21407	0.224721	0.487445
piR-32287	GXN_552813	piR-hsa-12399	123.082	0.799889	0.659383	1.21309	0.225097	0.487919
piR-36869	GXN_570947	piR-hsa-29003	94.2883	-0.478269	0.39445	-1.2125	0.225323	0.488068
piR-48363	GXN_550749	piR-hsa-10491	31.4929	-0.396517	0.327501	-1.21074	0.225997	0.489187
piR-30438	GXN_539465	piR-hsa-182	1706.42	-0.477477	0.394729	-1.20963	0.226419	0.489759
piR-51238	GXN_553402	piR-hsa-12937	17.1888	0.647615	0.536118	1.20797	0.227058	0.489781
piR-56554	GXN_560796	piR-hsa-19710	255.094	-0.696584	0.576658	-1.20797	0.22706	0.489781
piR-57508	GXN_561774	piR-hsa-20605	101.559	0.810787	0.671239	1.2079	0.227087	0.489781
piR-33581	GXN_565173	piR-hsa-23717	77.8934	0.81751	0.676605	1.20825	0.22695	0.489781
piR-36423	GXN_570478	piR-hsa-28572	45.9916	-0.735104	0.608753	-1.20756	0.227218	0.489781
piR-43344	GXN_545333	piR-hsa-5524	266.946	-0.317452	0.26309	-1.20663	0.227575	0.490209
piR-40157	GXN_541860	piR-hsa-2325	44.299	-0.784249	0.650413	-1.20577	0.227905	0.490581
piR-35423	GXN_569454	piR-hsa-27632	19.2732	-0.524283	0.435758	-1.20315	0.228918	0.49242
piR-48218	GXN_550589	piR-hsa-10346	28.1389	0.68818	0.572232	1.20262	0.229122	0.492517
piR-31132	GXN_540718	piR-hsa-1271	16.1899	0.508919	0.424144	1.19987	0.230188	0.492565
piR-49635	GXN_552175	piR-hsa-11807	720.29	0.563231	0.468668	1.20177	0.229453	0.492565
piR-32522	GXN_553069	piR-hsa-12633	254.346	0.590807	0.492462	1.1997	0.230255	0.492565
piR-50793	GXN_554498	piR-hsa-13947	654.284	1.00407	0.836603	1.20018	0.230071	0.492565
piR-51010	GXN_554704	piR-hsa-14135	22.0918	-0.493088	0.410762	-1.20042	0.229975	0.492565
piR-54235	GXN_557414	piR-hsa-16631	97.5374	-0.42849	0.357139	-1.19978	0.230223	0.492565
piR-57451	GXN_561729	piR-hsa-20563	153.514	-0.712319	0.593589	-1.20002	0.230131	0.492565
piR-43403	GXN_545396	piR-hsa-5583	16.8956	-0.658403	0.550496	-1.19602	0.23169	0.492579
piR-50546	GXN_554245	piR-hsa-13714	26.3934	0.670276	0.559861	1.19722	0.231221	0.492579
piR-55177	GXN_559250	piR-hsa-18312	20.9084	-0.688371	0.575352	-1.19643	0.231527	0.492579
piR-55929	GXN_560140	piR-hsa-19114	554.952	-0.907754	0.757839	-1.19782	0.230987	0.492579
piR-56391	GXN_560633	piR-hsa-19561	21.3687	-0.552393	0.461025	-1.19819	0.230845	0.492579
piR-33415	GXN_565007	piR-hsa-23566	789.41	0.58861	0.491211	1.19828	0.230807	0.492579
piR-60099	GXN_565723	piR-hsa-24221	66.0143	1.01263	0.845268	1.198	0.230918	0.492579
piR-60963	GXN_566743	piR-hsa-25157	21.9207	-0.905766	0.756376	-1.19751	0.231109	0.492579
piR-38540	GXN_572748	piR-hsa-30674	46.0116	-0.50816	0.424824	-1.19617	0.231631	0.492579
piR-58186	GXN_562594	piR-hsa-21353	231.216	-0.655872	0.549555	-1.19346	0.232689	0.494365
piR-39427	GXN_573804	piR-hsa-31631	260.38	-0.586906	0.492008	-1.19288	0.232917	0.494511
piR-58520	GXN_562942	piR-hsa-21673	20.6895	-0.708416	0.594313	-1.19199	0.233264	0.494909
piR-41408	GXN_543238	piR-hsa-3589	312.487	-0.709401	0.595663	-1.19094	0.233676	0.495105
piR-44134	GXN_546162	piR-hsa-6285	16.1508	-0.562764	0.472457	-1.19114	0.233597	0.495105
piR-43917	GXN_545940	piR-hsa-6083	19.3302	0.606402	0.510079	1.18884	0.234503	0.495471
piR-47970	GXN_550334	piR-hsa-10113	16.956	0.955622	0.804074	1.18848	0.234646	0.495471
piR-32627	GXN_553184	piR-hsa-12738	234.316	-0.577533	0.485824	-1.18877	0.234531	0.495471
piR-56056	GXN_560264	piR-hsa-19226	21.1905	0.69874	0.587318	1.18971	0.234159	0.495471
piR-60156	GXN_565784	piR-hsa-24278	30.9067	0.851341	0.71615	1.18878	0.234528	0.495471
piR-30112	GXN_539694	piR-hsa-324	10052.4	-0.712239	0.601609	-1.18389	0.236456	0.496174
piR-30826	GXN_540405	piR-hsa-979	292.613	-0.650537	0.548685	-1.18563	0.235769	0.496174
piR-31776	GXN_541463	piR-hsa-1958	17.7655	0.664166	0.559797	1.18644	0.235448	0.496174
piR-44717	GXN_544713	piR-hsa-4947	46.9719	-0.532301	0.44989	-1.18318	0.236738	0.496174
piR-32352	GXN_552884	piR-hsa-12463	16.3613	-0.560704	0.473774	-1.18348	0.236617	0.496174
piR-51045	GXN_554743	piR-hsa-14170	32.5111	0.767804	0.648299	1.18434	0.23628	0.496174
piR-54265	GXN_558301	piR-hsa-17444	22127.8	-0.834695	0.704907	-1.18412	0.236365	0.496174
piR-58239	GXN_562651	piR-hsa-21406	19.4673	0.659492	0.556461	1.18515	0.235956	0.496174
piR-59291	GXN_563750	piR-hsa-22413	37.7395	-0.657093	0.553759	-1.1866	0.235384	0.496174
piR-35431	GXN_569463	piR-hsa-27640	29.2345	-0.476843	0.402429	-1.18491	0.236052	0.496174
piR-36095	GXN_570122	piR-hsa-28244	142.463	0.582588	0.491769	1.18468	0.236145	0.496174
piR-31453	GXN_541145	piR-hsa-1664	137.105	0.549878	0.465389	1.18154	0.237387	0.496529
piR-43959	GXN_545986	piR-hsa-6125	9144.24	-0.408844	0.345986	-1.18168	0.237334	0.496529
piR-57750	GXN_562038	piR-hsa-20847	25.5711	-0.563696	0.477063	-1.1816	0.237366	0.496529
piR-35464	GXN_568909	piR-hsa-27135	17.3677	0.529348	0.449097	1.17869	0.23852	0.498298
piR-38736	GXN_573069	piR-hsa-30958	122.884	0.528352	0.448438	1.17821	0.238714	0.498298
piR-39007	GXN_573365	piR-hsa-31227	41.7005	0.645683	0.548014	1.17822	0.238707	0.498298
piR-41222	GXN_542463	piR-hsa-2881	36.9413	-0.779823	0.662153	-1.17771	0.238913	0.498378
piR-59598	GXN_564053	piR-hsa-22691	45.7621	-0.770249	0.654419	-1.177	0.239197	0.498634
piR-43835	GXN_545852	piR-hsa-6001	46.8584	0.797434	0.680196	1.17236	0.241053	0.50183
piR-46033	GXN_548236	piR-hsa-8180	18.2459	-0.418398	0.356842	-1.1725	0.240995	0.50183
piR-53564	GXN_557571	piR-hsa-16772	30.3452	0.699261	0.596915	1.17146	0.241415	0.502247
piR-36339	GXN_570387	piR-hsa-28488	845.729	-0.593743	0.507039	-1.171	0.241599	0.502292
piR-45866	GXN_548053	piR-hsa-8013	223.254	0.990194	0.846317	1.17	0.241999	0.502422
piR-46916	GXN_549163	piR-hsa-9031	53.3849	-0.787966	0.673523	-1.16992	0.242034	0.502422
piR-32547	GXN_553096	piR-hsa-12658	53.4998	1.02709	0.878426	1.16924	0.242309	0.502422
piR-58675	GXN_563112	piR-hsa-21827	142.278	-0.740913	0.633614	-1.16934	0.242265	0.502422
piR-46199	GXN_548417	piR-hsa-8346	47.9531	0.729803	0.625161	1.16738	0.243055	0.503634
piR-32224	GXN_552760	piR-hsa-12350	167.678	-0.804763	0.689704	-1.16682	0.243282	0.503767
piR-41327	GXN_543149	piR-hsa-3508	138.382	-0.399345	0.342589	-1.16567	0.24375	0.504399
piR-48712	GXN_551117	piR-hsa-10826	43.2956	0.653088	0.56064	1.1649	0.244061	0.504706
piR-56049	GXN_560256	piR-hsa-19219	43.9581	-0.372512	0.320167	-1.16349	0.24463	0.505546
piR-45412	GXN_547587	piR-hsa-7590	189.129	-0.33705	0.289883	-1.16271	0.244947	0.505866
piR-54621	GXN_558688	piR-hsa-17799	1805.16	0.586538	0.505586	1.16011	0.246002	0.507676
piR-58055	GXN_562450	piR-hsa-21222	128.184	-0.705793	0.608574	-1.15975	0.246151	0.507676
piR-40359	GXN_542048	piR-hsa-2498	35.2911	-0.437788	0.378104	-1.15785	0.246925	0.508288
piR-43856	GXN_545875	piR-hsa-6022	114.69	0.501762	0.43364	1.15709	0.247234	0.508288
piR-33664	GXN_565263	piR-hsa-23800	35.6425	-0.760223	0.656689	-1.15766	0.247003	0.508288
piR-34482	GXN_568357	piR-hsa-26632	17.1591	-0.522065	0.450734	-1.15826	0.24676	0.508288
piR-36825	GXN_570899	piR-hsa-28959	24.666	-0.483255	0.417674	-1.15701	0.247266	0.508288
piR-40794	GXN_542598	piR-hsa-3006	87.8154	0.697031	0.60384	1.15433	0.248365	0.510208
piR-55962	GXN_560177	piR-hsa-19147	61.7708	-0.536321	0.465098	-1.15314	0.248854	0.510876
piR-31520	GXN_541218	piR-hsa-1731	74.3716	0.652672	0.570202	1.14463	0.252362	0.512087
piR-40097	GXN_541794	piR-hsa-2265	123.381	-0.574732	0.499217	-1.15127	0.249622	0.512087
piR-41236	GXN_543049	piR-hsa-3417	96.2186	0.907402	0.788904	1.15021	0.250059	0.512087
piR-42507	GXN_544368	piR-hsa-4628	184.046	0.756551	0.658414	1.14905	0.250535	0.512087
piR-44304	GXN_546349	piR-hsa-6455	144.345	-0.750652	0.653705	-1.1483	0.250843	0.512087
piR-44387	GXN_546439	piR-hsa-6538	214.677	0.593289	0.517499	1.14645	0.251607	0.512087
piR-46373	GXN_548592	piR-hsa-8505	244.844	-0.684609	0.596792	-1.14715	0.25132	0.512087
piR-46567	GXN_548801	piR-hsa-8696	19.3132	0.699543	0.609132	1.14843	0.250792	0.512087
piR-49660	GXN_552201	piR-hsa-11832	55.7024	-0.57397	0.501675	-1.14411	0.252579	0.512087
piR-50206	GXN_553926	piR-hsa-13417	19.1747	-0.448736	0.390411	-1.14939	0.250394	0.512087
piR-52345	GXN_556235	piR-hsa-15544	29.9357	-0.519534	0.453995	-1.14436	0.252473	0.512087
piR-56925	GXN_561204	piR-hsa-20081	39.2397	-0.574054	0.500746	-1.1464	0.251631	0.512087
piR-57988	GXN_562393	piR-hsa-21170	66.3424	-0.583019	0.508789	-1.1459	0.251838	0.512087
piR-33207	GXN_564794	piR-hsa-23373	18.9606	0.906657	0.788032	1.15053	0.249924	0.512087
piR-60390	GXN_566040	piR-hsa-24512	20.0625	-0.538677	0.470747	-1.1443	0.252498	0.512087
piR-36001	GXN_570020	piR-hsa-28150	56.799	0.605178	0.527666	1.14689	0.251425	0.512087
piR-36853	GXN_570929	piR-hsa-28987	17.8549	0.530745	0.462379	1.14786	0.251028	0.512087
piR-38498	GXN_572704	piR-hsa-30632	13505.5	-0.549987	0.479685	-1.14656	0.251564	0.512087
piR-38501	GXN_572707	piR-hsa-30635	46.0373	-0.626005	0.547009	-1.14441	0.252452	0.512087
piR-42796	GXN_544790	piR-hsa-5019	570.443	-0.686181	0.60017	-1.14331	0.252909	0.512422
piR-43561	GXN_545552	piR-hsa-5727	30.922	-0.469701	0.411297	-1.142	0.253455	0.512581
piR-52437	GXN_556335	piR-hsa-15636	16.9986	0.576693	0.505163	1.1416	0.253621	0.512581
piR-56137	GXN_560353	piR-hsa-19307	30.2247	-0.511803	0.448347	-1.14153	0.253648	0.512581
piR-61866	GXN_567648	piR-hsa-25986	19.7367	-0.612274	0.536185	-1.14191	0.253493	0.512581
piR-31013	GXN_540590	piR-hsa-1152	34.2842	0.79233	0.695981	1.13844	0.254938	0.513184
piR-43926	GXN_545950	piR-hsa-6092	26.6515	0.505421	0.443712	1.13907	0.254673	0.513184
piR-32878	GXN_553570	piR-hsa-13089	34.9276	0.585821	0.514437	1.13876	0.254802	0.513184
piR-33347	GXN_564932	piR-hsa-23498	40.8692	-0.57009	0.500736	-1.1385	0.25491	0.513184
piR-34091	GXN_567946	piR-hsa-26257	99.1364	-1.00825	0.884587	-1.1398	0.254371	0.513184
piR-38801	GXN_573139	piR-hsa-31021	446.858	-0.670309	0.588057	-1.13987	0.25434	0.513184
piR-52088	GXN_555958	piR-hsa-15287	18.1241	0.511687	0.44977	1.13766	0.255261	0.5135
piR-49293	GXN_551821	piR-hsa-11481	78.6709	0.851295	0.749267	1.13617	0.255885	0.514422
piR-49053	GXN_551596	piR-hsa-11270	214.713	-0.590106	0.519872	-1.1351	0.256334	0.514991
piR-41312	GXN_543133	piR-hsa-3493	20.3242	0.673996	0.594748	1.13325	0.25711	0.516217
piR-36629	GXN_570687	piR-hsa-28763	126.24	-0.73129	0.648017	-1.1285	0.259107	0.519889
piR-30071	GXN_539650	piR-hsa-283	18.5983	0.53723	0.47703	1.1262	0.260082	0.520222
piR-40469	GXN_540889	piR-hsa-1428	19.3695	-0.594939	0.52849	-1.12573	0.260279	0.520222
piR-41936	GXN_543794	piR-hsa-4101	24.1201	-0.536542	0.476391	-1.12627	0.260053	0.520222
piR-45510	GXN_547678	piR-hsa-7673	153.975	-0.516517	0.458736	-1.12596	0.260184	0.520222
piR-35524	GXN_569531	piR-hsa-27704	172.029	0.690913	0.612809	1.12745	0.259551	0.520222
piR-38414	GXN_572613	piR-hsa-30548	18.071	0.487135	0.432517	1.12628	0.260047	0.520222
piR-61991	GXN_567786	piR-hsa-26111	21.6467	-0.537233	0.477959	-1.12402	0.261006	0.521341
piR-30105	GXN_539686	piR-hsa-317	128.13	-0.401666	0.357497	-1.12355	0.261204	0.5214
piR-36140	GXN_570171	piR-hsa-28289	57.4276	0.432813	0.385395	1.12304	0.261421	0.521499
piR-38653	GXN_572868	piR-hsa-30787	487.268	-0.519079	0.462714	-1.12181	0.261942	0.522201
piR-41405	GXN_543235	piR-hsa-3586	39.81	0.630039	0.562683	1.11971	0.262839	0.523654
piR-49028	GXN_551570	piR-hsa-11245	62.6079	0.682156	0.609805	1.11865	0.263291	0.523881
piR-58712	GXN_563153	piR-hsa-21864	214.699	-0.505953	0.452272	-1.11869	0.263271	0.523881
piR-43597	GXN_545591	piR-hsa-5763	22.8453	-0.37512	0.33551	-1.11806	0.263542	0.524045
piR-36491	GXN_570536	piR-hsa-28626	25.534	0.476442	0.426299	1.11762	0.263728	0.524079
piR-32738	GXN_553304	piR-hsa-12849	44.0954	0.577938	0.517931	1.11586	0.264482	0.524593
piR-51428	GXN_555145	piR-hsa-14538	21.326	-0.662404	0.59364	-1.11583	0.264493	0.524593
piR-33536	GXN_565123	piR-hsa-23672	4481.83	-0.799817	0.716331	-1.11655	0.264188	0.524593
piR-60696	GXN_566358	piR-hsa-24803	233.552	0.846446	0.758936	1.11531	0.264719	0.524705
piR-42912	GXN_544915	piR-hsa-5135	48.5738	0.679025	0.609421	1.11421	0.265188	0.525299
piR-49298	GXN_551826	piR-hsa-11486	19.5123	-0.711611	0.638945	-1.11373	0.265396	0.525376
piR-57016	GXN_561288	piR-hsa-20157	27.4997	0.761149	0.684106	1.11262	0.265873	0.525984
piR-42608	GXN_544478	piR-hsa-4729	17.1788	0.510664	0.459355	1.1117	0.266268	0.526096
piR-35526	GXN_569534	piR-hsa-27706	365.494	0.665942	0.598935	1.11188	0.266191	0.526096
piR-35583	GXN_569596	piR-hsa-27763	274.063	0.511509	0.461234	1.109	0.267429	0.528054
piR-42571	GXN_544439	piR-hsa-4692	58.4164	-0.476549	0.430006	-1.10824	0.267758	0.528147
piR-55576	GXN_559768	piR-hsa-18777	25.8013	-0.614718	0.554806	-1.10799	0.267868	0.528147
piR-60668	GXN_566327	piR-hsa-24775	126.77	-0.341809	0.308573	-1.10771	0.267987	0.528147
piR-40681	GXN_542381	piR-hsa-2805	156.313	-0.634919	0.574373	-1.10541	0.268981	0.529106
piR-42275	GXN_544146	piR-hsa-4425	45.9807	-0.511976	0.463351	-1.10494	0.269184	0.529106
piR-42424	GXN_544309	piR-hsa-4574	33.2679	0.578674	0.524406	1.10348	0.269817	0.529106
piR-42862	GXN_544861	piR-hsa-5085	32.7393	-0.546443	0.494044	-1.10606	0.2687	0.529106
piR-45419	GXN_547594	piR-hsa-7597	359.79	-0.897338	0.813221	-1.10344	0.269837	0.529106
piR-60844	GXN_566613	piR-hsa-25038	23.8277	-0.44969	0.407187	-1.10438	0.269428	0.529106
piR-61145	GXN_566926	piR-hsa-25323	82.7742	-0.377328	0.341429	-1.10514	0.269097	0.529106
piR-38633	GXN_572846	piR-hsa-30767	18.0707	0.494584	0.447981	1.10403	0.269581	0.529106
piR-34393	GXN_568261	piR-hsa-26543	217.894	0.558036	0.507183	1.10027	0.271216	0.531474
piR-46979	GXN_549230	piR-hsa-9094	19.0332	-0.532048	0.483927	-1.09944	0.271577	0.531846
piR-47503	GXN_549840	piR-hsa-9660	47.3392	-0.462059	0.421372	-1.09656	0.272834	0.533325
piR-48316	GXN_550697	piR-hsa-10444	16.1401	0.568813	0.518775	1.09645	0.27288	0.533325
piR-53630	GXN_557642	piR-hsa-16838	36.7028	0.606111	0.552865	1.09631	0.272944	0.533325
piR-54492	GXN_558546	piR-hsa-17670	62.829	-0.595246	0.543327	-1.09556	0.273273	0.533325
piR-56460	GXN_560708	piR-hsa-19630	19.7523	0.547903	0.500208	1.09535	0.273363	0.533325
piR-58808	GXN_563242	piR-hsa-21945	17.9154	-0.813806	0.742708	-1.09573	0.273198	0.533325
piR-42877	GXN_544876	piR-hsa-5100	50.7761	-0.500674	0.45771	-1.09387	0.274013	0.53415
piR-58077	GXN_562474	piR-hsa-21244	18.139	-0.537474	0.491472	-1.0936	0.27413	0.53415
piR-46145	GXN_548359	piR-hsa-8292	44.1402	-0.534968	0.489363	-1.09319	0.274309	0.534163
piR-42844	GXN_544842	piR-hsa-5067	117.696	0.530433	0.485963	1.09151	0.275049	0.535267
piR-30890	GXN_540474	piR-hsa-1043	105.928	0.561864	0.515387	1.09018	0.275634	0.535514
piR-43598	GXN_545592	piR-hsa-5764	40.3893	-0.33548	0.308099	-1.08887	0.276211	0.535514
piR-45636	GXN_547817	piR-hsa-7798	36.9978	-0.590583	0.542105	-1.08943	0.275967	0.535514
piR-48667	GXN_551067	piR-hsa-10781	190.808	-0.466037	0.42778	-1.08943	0.275964	0.535514
piR-53065	GXN_556945	piR-hsa-16203	1149.39	-0.719728	0.659843	-1.09076	0.275381	0.535514
piR-33733	GXN_565338	piR-hsa-23869	35.6676	0.561402	0.515474	1.0891	0.27611	0.535514
piR-49396	GXN_551932	piR-hsa-11584	22.495	-0.752754	0.691748	-1.08819	0.276511	0.535762
piR-62029	GXN_567827	piR-hsa-26149	21.3707	-0.499425	0.459267	-1.08744	0.276843	0.53607
piR-33082	GXN_564658	piR-hsa-23248	390.847	0.586997	0.540348	1.08633	0.277332	0.536682
piR-31197	GXN_540772	piR-hsa-1321	16.5024	-0.372741	0.343405	-1.08543	0.277732	0.537078
piR-45933	GXN_548126	piR-hsa-8080	16.103	-0.563368	0.519565	-1.08431	0.278228	0.537078
piR-51254	GXN_554955	piR-hsa-14364	94.598	0.675618	0.622723	1.08494	0.277948	0.537078
piR-34586	GXN_568472	piR-hsa-26736	24.287	0.370709	0.341828	1.08449	0.278148	0.537078
piR-38714	GXN_572933	piR-hsa-30848	28.8096	-0.738221	0.681805	-1.08274	0.278922	0.538082
piR-31068	GXN_540649	piR-hsa-1207	52.7198	0.490873	0.453784	1.08173	0.279371	0.538352
piR-33510	GXN_564282	piR-hsa-22905	1646.38	-0.437521	0.404494	-1.08165	0.279409	0.538352
piR-32774	GXN_553456	piR-hsa-12985	16.4472	-0.357784	0.331455	-1.07944	0.280394	0.539854
piR-35614	GXN_569629	piR-hsa-27793	26.1365	-0.719983	0.667197	-1.07912	0.280536	0.539854
piR-46805	GXN_549042	piR-hsa-8920	19.5833	-0.683084	0.633479	-1.07831	0.280897	0.539879
piR-49813	GXN_552334	piR-hsa-11955	102.581	-0.576719	0.534752	-1.07848	0.28082	0.539879
piR-30191	GXN_539763	piR-hsa-388	95.8579	-0.539499	0.500816	-1.07724	0.281373	0.540459
piR-40247	GXN_541926	piR-hsa-2386	29.5585	-0.57864	0.53849	-1.07456	0.282572	0.541334
piR-40981	GXN_542786	piR-hsa-3177	40.2957	0.609563	0.568309	1.07259	0.283455	0.541334
piR-41435	GXN_543268	piR-hsa-3616	31.5797	0.625887	0.582929	1.07369	0.282961	0.541334
piR-43235	GXN_545215	piR-hsa-5415	70.5953	-0.413237	0.38526	-1.07262	0.283443	0.541334
piR-56156	GXN_560374	piR-hsa-19326	48.9508	-0.694153	0.647802	-1.07155	0.283922	0.541334
piR-33335	GXN_564919	piR-hsa-23486	49.1708	-0.588252	0.546857	-1.0757	0.282064	0.541334
piR-60555	GXN_566205	piR-hsa-24662	43.4207	0.630601	0.586887	1.07449	0.282605	0.541334
piR-61276	GXN_566466	piR-hsa-24904	50023.8	-0.690491	0.642941	-1.07396	0.282842	0.541334
piR-60773	GXN_566537	piR-hsa-24967	44.7976	-0.469	0.437367	-1.07233	0.283573	0.541334
piR-61088	GXN_566863	piR-hsa-25267	35.5354	0.845231	0.788768	1.07158	0.283907	0.541334
piR-35469	GXN_568915	piR-hsa-27140	93.9726	-0.427284	0.397337	-1.07537	0.282209	0.541334
piR-38415	GXN_572615	piR-hsa-30549	63.4498	0.724442	0.67563	1.07225	0.283609	0.541334
piR-41013	GXN_542821	piR-hsa-3209	22.3664	-0.819861	0.766288	-1.06991	0.284658	0.541854
piR-48834	GXN_551251	piR-hsa-10948	600.818	0.526192	0.491571	1.07043	0.284426	0.541854
piR-34118	GXN_567976	piR-hsa-26284	18.7391	-0.621099	0.580585	-1.06978	0.284718	0.541854
piR-34344	GXN_568207	piR-hsa-26494	27.6499	-0.461357	0.431776	-1.06851	0.28529	0.542385
piR-35828	GXN_569847	piR-hsa-27992	40.9912	0.945288	0.884781	1.06839	0.285346	0.542385
piR-56271	GXN_560501	piR-hsa-19441	28.4806	0.353539	0.331517	1.06643	0.28623	0.543399
piR-38497	GXN_572703	piR-hsa-30631	40.2542	-0.434322	0.407174	-1.06668	0.286118	0.543399
piR-43466	GXN_545463	piR-hsa-5646	35.8032	-0.439137	0.412034	-1.06578	0.286524	0.543625
piR-59259	GXN_563714	piR-hsa-22381	40.9842	-0.511511	0.48116	-1.06308	0.287746	0.54561
piR-48433	GXN_550826	piR-hsa-10561	33.732	-0.474467	0.446953	-1.06156	0.288437	0.546586
piR-31899	GXN_541595	piR-hsa-2081	52.9859	-0.736763	0.69525	-1.05971	0.289276	0.547792
piR-44963	GXN_547145	piR-hsa-7187	109.324	-0.735934	0.694683	-1.05938	0.289426	0.547792
piR-33527	GXN_565113	piR-hsa-23663	3018.27	-0.598213	0.566316	-1.05632	0.290821	0.550096
piR-41464	GXN_543299	piR-hsa-3645	183.924	0.51681	0.489821	1.0551	0.29138	0.550529
piR-61785	GXN_567559	piR-hsa-25906	102.342	0.855273	0.810949	1.05466	0.291582	0.550529
piR-37175	GXN_571389	piR-hsa-29409	41.5633	0.707914	0.671217	1.05467	0.291575	0.550529
piR-31758	GXN_541443	piR-hsa-1940	24.2909	0.637376	0.605122	1.0533	0.292203	0.551031
piR-46297	GXN_548508	piR-hsa-8429	47.4292	0.739563	0.701971	1.05355	0.292087	0.551031
piR-40815	GXN_542621	piR-hsa-3027	26.4298	0.496369	0.471587	1.05255	0.292547	0.551346
piR-37431	GXN_571632	piR-hsa-29636	61.6965	-0.327374	0.311409	-1.05127	0.293136	0.55212
piR-47665	GXN_550016	piR-hsa-9822	252.246	0.874102	0.832048	1.05054	0.293469	0.552195
piR-55222	GXN_559300	piR-hsa-18357	35.8882	0.438672	0.417753	1.05007	0.293684	0.552195
piR-36170	GXN_570204	piR-hsa-28319	360.609	-0.407395	0.387988	-1.05002	0.293709	0.552195
piR-31930	GXN_541629	piR-hsa-2112	27.9714	-0.497657	0.476092	-1.0453	0.295886	0.555596
piR-45125	GXN_547305	piR-hsa-7332	17.0816	0.504224	0.482544	1.04493	0.296056	0.555596
piR-50083	GXN_553792	piR-hsa-13294	51.8717	0.420799	0.40245	1.04559	0.295749	0.555596
piR-41528	GXN_543365	piR-hsa-3709	74.3062	-0.565699	0.541893	-1.04393	0.296518	0.555744
piR-42651	GXN_544525	piR-hsa-4772	29.896	-0.525115	0.503178	-1.0436	0.296671	0.555744
piR-33526	GXN_565112	piR-hsa-23662	2794.4	-0.592841	0.567794	-1.04411	0.296433	0.555744
piR-30482	GXN_540045	piR-hsa-650	35.649	-0.472184	0.452777	-1.04286	0.297012	0.556046
piR-37181	GXN_571395	piR-hsa-29415	37.275	-0.513752	0.493294	-1.04147	0.297656	0.556916
piR-43901	GXN_545923	piR-hsa-6067	30.0415	0.584064	0.561346	1.04047	0.298122	0.557452
piR-42119	GXN_543993	piR-hsa-4284	33.1815	-0.438091	0.422039	-1.03803	0.299254	0.55747
piR-48159	GXN_550524	piR-hsa-10287	19.3781	0.518354	0.499686	1.03736	0.299568	0.55747
piR-54065	GXN_558099	piR-hsa-17259	21.4519	0.548462	0.528319	1.03813	0.299211	0.55747
piR-33420	GXN_565012	piR-hsa-23571	50.4947	0.60887	0.586811	1.03759	0.29946	0.55747
piR-61298	GXN_567061	piR-hsa-25447	19513.6	-0.581052	0.559361	-1.03878	0.298908	0.55747
piR-61323	GXN_567088	piR-hsa-25472	29.5482	-0.532664	0.512985	-1.03836	0.299102	0.55747
piR-61659	GXN_567439	piR-hsa-25794	35.2349	0.829022	0.798813	1.03782	0.299355	0.55747
piR-61919	GXN_567706	piR-hsa-26039	653.761	-0.407875	0.393089	-1.03762	0.299448	0.55747
piR-31986	GXN_541675	piR-hsa-2154	209.497	0.454991	0.439006	1.03641	0.30001	0.557746
piR-54626	GXN_558693	piR-hsa-17804	9520.09	-0.658014	0.634983	-1.03627	0.300076	0.557746
piR-32715	GXN_553279	piR-hsa-12826	202.738	-0.654232	0.632635	-1.03414	0.301071	0.559261
piR-43785	GXN_545797	piR-hsa-5951	75.278	-0.528835	0.512161	-1.03256	0.301811	0.5603
piR-43687	GXN_545689	piR-hsa-5853	25.0667	-0.620915	0.601761	-1.03183	0.302152	0.560598
piR-43161	GXN_545151	piR-hsa-5355	36.2786	0.524532	0.509568	1.02937	0.303308	0.5614
piR-57130	GXN_561413	piR-hsa-20271	16.5288	-0.444635	0.431942	-1.02939	0.303298	0.5614
piR-34303	GXN_568163	piR-hsa-26453	16.4756	0.726553	0.705392	1.03	0.30301	0.5614
piR-37267	GXN_571456	piR-hsa-29472	22.3437	-0.486483	0.472078	-1.03051	0.302769	0.5614
piR-50898	GXN_554613	piR-hsa-14052	19.4706	0.519992	0.50536	1.02895	0.303502	0.561424
piR-37406	GXN_571605	piR-hsa-29611	38.7955	0.559071	0.543819	1.02805	0.303928	0.561878
piR-39453	GXN_573832	piR-hsa-31657	31.7707	0.580565	0.565187	1.02721	0.304322	0.562272
piR-43995	GXN_546010	piR-hsa-6146	17416.4	-0.387276	0.378111	-1.02424	0.305722	0.563542
piR-47149	GXN_549506	piR-hsa-9349	16.7321	0.720731	0.704488	1.02306	0.306281	0.563542
piR-51309	GXN_555015	piR-hsa-14419	408.663	-0.561305	0.548157	-1.02398	0.305843	0.563542
piR-53203	GXN_557097	piR-hsa-16341	21.0976	0.504957	0.492826	1.02461	0.305545	0.563542
piR-58060	GXN_562455	piR-hsa-21227	74.4212	0.722229	0.705841	1.02322	0.306205	0.563542
piR-36711	GXN_570776	piR-hsa-28845	1813.84	0.537426	0.524204	1.02522	0.305258	0.563542
piR-38944	GXN_573295	piR-hsa-31164	24.2069	0.59227	0.578549	1.02372	0.30597	0.563542
piR-44881	GXN_547055	piR-hsa-7105	18.5117	0.507885	0.496993	1.02192	0.306821	0.564201
piR-43204	GXN_545198	piR-hsa-5398	93.7479	0.542978	0.531926	1.02078	0.30736	0.564858
piR-43939	GXN_545964	piR-hsa-6105	61.725	0.47857	0.469132	1.02012	0.307672	0.565098
piR-51639	GXN_555485	piR-hsa-14852	19.3711	0.476193	0.467307	1.01901	0.308196	0.56539
piR-37132	GXN_571342	piR-hsa-29366	16.7651	-0.516539	0.506794	-1.01923	0.308094	0.56539
piR-30571	GXN_540142	piR-hsa-739	33.2338	-0.642327	0.636652	-1.00891	0.313016	0.566201
piR-31769	GXN_541455	piR-hsa-1951	223.72	0.506657	0.499151	1.01504	0.310088	0.566201
piR-41895	GXN_543751	piR-hsa-4062	27.1438	0.477648	0.472905	1.01003	0.312481	0.566201
piR-42548	GXN_544413	piR-hsa-4669	65.9512	-0.380617	0.374818	-1.01547	0.309881	0.566201
piR-44968	GXN_546782	piR-hsa-6856	20.7122	-0.523019	0.516146	-1.01332	0.310909	0.566201
piR-33001	GXN_553702	piR-hsa-13212	45.2364	-0.709561	0.70196	-1.01083	0.312099	0.566201
piR-50212	GXN_553932	piR-hsa-13423	17.3693	-0.419071	0.413471	-1.01354	0.310801	0.566201
piR-51199	GXN_554911	piR-hsa-14323	20.8274	-0.643415	0.632511	-1.01724	0.309039	0.566201
piR-51406	GXN_555122	piR-hsa-14516	17.5875	0.578562	0.571662	1.01207	0.311505	0.566201
piR-51540	GXN_555377	piR-hsa-14753	20.7982	0.550186	0.545127	1.00928	0.31284	0.566201
piR-52016	GXN_555879	piR-hsa-15215	367.424	0.461849	0.45572	1.01345	0.310846	0.566201
piR-53946	GXN_557970	piR-hsa-17140	16.6493	0.52859	0.519524	1.01745	0.308939	0.566201
piR-55097	GXN_559162	piR-hsa-18232	42.3191	0.621627	0.613868	1.01264	0.311232	0.566201
piR-55606	GXN_559801	piR-hsa-18806	274.986	-0.803999	0.793006	-1.01386	0.310648	0.566201
piR-55956	GXN_560170	piR-hsa-19141	75.6153	0.663764	0.654663	1.0139	0.310629	0.566201
piR-56387	GXN_560628	piR-hsa-19557	34.7323	-0.714288	0.706587	-1.0109	0.312065	0.566201
piR-57423	GXN_561698	piR-hsa-20535	21.5121	0.439637	0.433454	1.01426	0.310456	0.566201
piR-58242	GXN_562655	piR-hsa-21409	39.873	-0.443469	0.437278	-1.01416	0.310507	0.566201
piR-33908	GXN_565530	piR-hsa-24044	18.6984	0.615654	0.60879	1.01128	0.311885	0.566201
piR-34984	GXN_568989	piR-hsa-27208	52.7709	-0.405348	0.400173	-1.01293	0.311093	0.566201
piR-35644	GXN_569662	piR-hsa-27823	31.2371	-0.469159	0.464428	-1.01019	0.312405	0.566201
piR-36848	GXN_570924	piR-hsa-28982	22.345	-0.517144	0.511599	-1.01084	0.312094	0.566201
piR-37457	GXN_571660	piR-hsa-29662	32.6972	0.65914	0.652429	1.01029	0.312358	0.566201
piR-38436	GXN_572638	piR-hsa-30570	24.1382	0.516139	0.511296	1.00947	0.312748	0.566201
piR-41998	GXN_543861	piR-hsa-4163	17.247	0.430483	0.42718	1.00773	0.313583	0.566551
piR-42634	GXN_544506	piR-hsa-4755	24.7819	0.420542	0.417671	1.00687	0.313996	0.566551
piR-49645	GXN_552186	piR-hsa-11817	5627.12	0.682538	0.677405	1.00758	0.313657	0.566551
piR-51256	GXN_554957	piR-hsa-14366	50.6208	0.383387	0.380601	1.00732	0.313781	0.566551
piR-34618	GXN_568507	piR-hsa-26768	17.202	-0.54449	0.540914	-1.00661	0.314122	0.566551
piR-52567	GXN_556459	piR-hsa-15751	18.6631	0.757008	0.753682	1.00441	0.31518	0.568129
piR-51671	GXN_555520	piR-hsa-14884	37.2525	0.524419	0.525536	0.997876	0.31834	0.573492
piR-44640	GXN_546693	piR-hsa-6776	68.0801	0.489829	0.49136	0.996884	0.318821	0.573945
piR-60553	GXN_566203	piR-hsa-24660	44.9006	0.576531	0.578501	0.996595	0.318961	0.573945
piR-45394	GXN_547567	piR-hsa-7572	231.947	0.427678	0.429698	0.995299	0.319591	0.574745
piR-46284	GXN_548494	piR-hsa-8416	18.3829	0.379243	0.381461	0.994187	0.320132	0.575242
piR-35343	GXN_569367	piR-hsa-27552	2579.17	-0.571216	0.574681	-0.99397	0.320238	0.575242
piR-52956	GXN_556842	piR-hsa-16109	706.383	-0.47635	0.480356	-0.99166	0.321363	0.576263
piR-53215	GXN_557110	piR-hsa-16353	302.805	-0.690252	0.695853	-0.99195	0.321222	0.576263
piR-33894	GXN_565515	piR-hsa-24030	21.259	-0.673144	0.678691	-0.991826	0.321282	0.576263
piR-41667	GXN_543517	piR-hsa-3848	18.0625	-0.387715	0.391489	-0.99036	0.321998	0.577012
piR-32238	GXN_551511	piR-hsa-11190	40.0505	-0.320267	0.323736	-0.989284	0.322524	0.577012
piR-54716	GXN_558792	piR-hsa-17894	25.0155	0.614031	0.620615	0.989392	0.322472	0.577012
piR-37309	GXN_571500	piR-hsa-29514	25.459	-0.75075	0.758631	-0.989612	0.322364	0.577012
piR-36251	GXN_570291	piR-hsa-28400	47.1636	-0.424905	0.430146	-0.987818	0.323242	0.577963
piR-52252	GXN_556136	piR-hsa-15451	35.4675	0.752044	0.761817	0.987171	0.323559	0.578196
piR-44910	GXN_547086	piR-hsa-7134	18.414	0.402012	0.407591	0.986313	0.32398	0.578615
piR-42028	GXN_543893	piR-hsa-4193	18.6227	-0.516401	0.523776	-0.98592	0.324173	0.578627
piR-42410	GXN_544293	piR-hsa-4560	93.0995	-0.480069	0.487344	-0.985072	0.324589	0.579036
piR-60137	GXN_565763	piR-hsa-24259	37.1566	-0.56786	0.577453	-0.983388	0.325417	0.58018
piR-48244	GXN_550618	piR-hsa-10372	85.7912	-0.436981	0.444721	-0.982596	0.325806	0.580542
piR-51518	GXN_555354	piR-hsa-14731	20.7941	-0.480837	0.489864	-0.981572	0.326311	0.581106
piR-52677	GXN_556576	piR-hsa-15860	50.6004	-0.717874	0.73182	-0.980942	0.326621	0.581326
piR-40573	GXN_542264	piR-hsa-2697	19.2755	0.342706	0.349846	0.979593	0.327287	0.581825
piR-42418	GXN_544302	piR-hsa-4568	32.3502	-0.480832	0.491009	-0.979273	0.327445	0.581825
piR-45679	GXN_547864	piR-hsa-7841	179.97	0.788437	0.805781	0.978477	0.327839	0.581825
piR-51215	GXN_554929	piR-hsa-14339	23.0571	-0.611205	0.624509	-0.978697	0.32773	0.581825
piR-59260	GXN_563715	piR-hsa-22382	35.7594	-0.50806	0.519228	-0.97849	0.327832	0.581825
piR-44421	GXN_546476	piR-hsa-6572	2035.88	-0.621186	0.636866	-0.975379	0.329372	0.583092
piR-45079	GXN_547255	piR-hsa-7286	476.028	0.692827	0.710757	0.974774	0.329672	0.583092
piR-32176	GXN_552709	piR-hsa-12303	1033.15	0.805729	0.825374	0.976199	0.328966	0.583092
piR-50111	GXN_553823	piR-hsa-13322	19.6197	-0.409198	0.419056	-0.976475	0.328829	0.583092
piR-35855	GXN_569877	piR-hsa-28019	71479.6	-0.707135	0.725446	-0.974759	0.32968	0.583092
piR-38307	GXN_572499	piR-hsa-30441	21.28	-0.477917	0.49026	-0.974823	0.329648	0.583092
piR-44687	GXN_546745	piR-hsa-6823	20.9894	0.665087	0.682679	0.974232	0.329942	0.583222
piR-42995	GXN_544974	piR-hsa-5189	34.3728	0.334794	0.344186	0.972712	0.330697	0.584225
piR-45588	GXN_547764	piR-hsa-121	26.6849	0.407469	0.419104	0.972238	0.330932	0.584308
piR-42486	GXN_544345	piR-hsa-4607	23.7352	-0.434994	0.449171	-0.968438	0.332826	0.586317
piR-55891	GXN_560099	piR-hsa-19076	67.206	0.540269	0.557861	0.968466	0.332812	0.586317
piR-57766	GXN_562056	piR-hsa-20863	24.2914	-0.383453	0.395722	-0.968997	0.332546	0.586317
piR-34765	GXN_568653	piR-hsa-26901	101.172	-0.374601	0.386747	-0.968594	0.332748	0.586317
piR-35407	GXN_569437	piR-hsa-27616	61.1895	-0.394115	0.407393	-0.967408	0.33334	0.586558
piR-38641	GXN_572855	piR-hsa-30775	228.875	-0.563176	0.582042	-0.967587	0.333251	0.586558
piR-41633	GXN_543480	piR-hsa-3814	740.534	0.711452	0.736532	0.965948	0.33407	0.587101
piR-32984	GXN_553683	piR-hsa-13195	77.3027	-0.607758	0.629267	-0.965818	0.334135	0.587101
piR-36037	GXN_570059	piR-hsa-28186	29.4603	-0.405504	0.419926	-0.965656	0.334216	0.587101
piR-32351	GXN_552883	piR-hsa-12462	44.7286	0.340449	0.35358	0.962864	0.335616	0.589225
piR-44372	GXN_546423	piR-hsa-6523	52.3298	0.634657	0.659971	0.961644	0.336228	0.589968
piR-40844	GXN_542653	piR-hsa-3056	30.9076	-0.499357	0.519712	-0.960833	0.336636	0.590016
piR-36705	GXN_570770	piR-hsa-28839	36.2236	-0.489367	0.509226	-0.961002	0.336551	0.590016
piR-44735	GXN_546894	piR-hsa-6959	404.888	0.702924	0.734335	0.957225	0.338454	0.592867
piR-43371	GXN_545361	piR-hsa-5551	114.002	-0.398692	0.417233	-0.955563	0.339293	0.594002
piR-34437	GXN_568309	piR-hsa-26587	21.1498	0.405346	0.424713	0.9544	0.339881	0.594696
piR-57461	GXN_561739	piR-hsa-20573	21.4207	0.45591	0.477887	0.954012	0.340078	0.594705
piR-45684	GXN_547870	piR-hsa-7846	16.5461	-0.402014	0.421562	-0.953629	0.340271	0.594708
piR-42098	GXN_543970	piR-hsa-4263	59.7354	-0.393111	0.412908	-0.952055	0.341069	0.595297
piR-55592	GXN_559786	piR-hsa-18792	74.1735	-0.758557	0.796874	-0.951917	0.341139	0.595297
piR-35413	GXN_569443	piR-hsa-27622	7309.7	0.644254	0.676858	0.95183	0.341183	0.595297
piR-44477	GXN_546518	piR-hsa-6613	73.7242	0.51213	0.538341	0.951311	0.341446	0.595421
piR-31662	GXN_541372	piR-hsa-1873	156.864	-0.648487	0.682784	-0.94977	0.342229	0.596451
piR-50494	GXN_553352	piR-hsa-12892	22.9648	0.557775	0.587822	0.948883	0.34268	0.596901
piR-44025	GXN_546042	piR-hsa-6176	102.462	0.453481	0.47812	0.948467	0.342892	0.596936
piR-47303	GXN_549658	piR-hsa-9489	121.33	-0.555073	0.585983	-0.947252	0.34351	0.597046
piR-55133	GXN_559202	piR-hsa-18268	16.6262	0.492852	0.520043	0.947713	0.343275	0.597046
piR-35412	GXN_569442	piR-hsa-27621	7333.25	0.640875	0.676593	0.947209	0.343533	0.597046
piR-35414	GXN_569444	piR-hsa-27623	7327.52	0.640533	0.676542	0.946776	0.343753	0.597095
piR-35411	GXN_569441	piR-hsa-27620	7354.72	0.639522	0.676089	0.945914	0.344192	0.597524
piR-31970	GXN_541657	piR-hsa-2138	3719.3	-0.565775	0.601392	-0.940775	0.34682	0.59774
piR-41719	GXN_542481	piR-hsa-2898	4627.03	0.699107	0.740814	0.943701	0.345323	0.59774
piR-42984	GXN_544633	piR-hsa-4872	67.581	-0.317046	0.33609	-0.943338	0.345508	0.59774
piR-45826	GXN_548009	piR-hsa-7973	22.993	-0.432657	0.45983	-0.940906	0.346753	0.59774
piR-47222	GXN_549242	piR-hsa-9104	14277.4	0.825205	0.875902	0.942121	0.346131	0.59774
piR-49124	GXN_551671	piR-hsa-11341	469.722	-0.45846	0.487159	-0.941088	0.34666	0.59774
piR-51809	GXN_555670	piR-hsa-15022	1519.53	-0.371741	0.39494	-0.94126	0.346572	0.59774
piR-53938	GXN_557961	piR-hsa-17132	31.302	0.320009	0.339791	0.941782	0.346304	0.59774
piR-57657	GXN_561936	piR-hsa-20754	164.475	-0.457006	0.48508	-0.942124	0.346129	0.59774
piR-58355	GXN_562763	piR-hsa-21508	38.9548	-0.350047	0.371978	-0.941042	0.346683	0.59774
piR-35410	GXN_569440	piR-hsa-27619	7415.26	0.637571	0.674505	0.945243	0.344535	0.59774
piR-39060	GXN_573422	piR-hsa-31280	27.1819	-0.487065	0.517694	-0.940836	0.346789	0.59774
piR-39586	GXN_573946	piR-hsa-31760	105.234	-0.479581	0.508964	-0.942268	0.346055	0.59774
piR-43372	GXN_545362	piR-hsa-5552	114.215	-0.392312	0.417369	-0.939965	0.347236	0.598124
piR-34443	GXN_568315	piR-hsa-26593	17.3289	-0.480579	0.511557	-0.939444	0.347503	0.598252
piR-35296	GXN_569316	piR-hsa-27505	16.7732	0.531173	0.565736	0.938907	0.347779	0.598395
piR-37124	GXN_571333	piR-hsa-29358	62.5414	-0.591615	0.631093	-0.937444	0.34853	0.599356
piR-33325	GXN_564908	piR-hsa-23476	37.6185	0.382065	0.407734	0.937043	0.348737	0.599379
piR-49895	GXN_552423	piR-hsa-12037	136.683	-0.692163	0.739169	-0.936407	0.349064	0.599382
piR-59050	GXN_563503	piR-hsa-22186	91.937	0.390058	0.4166	0.936289	0.349125	0.599382
piR-42495	GXN_544355	piR-hsa-4616	87.1595	-0.510976	0.546487	-0.935018	0.349779	0.599532
piR-51107	GXN_554811	piR-hsa-14231	109.058	0.679099	0.726099	0.935269	0.34965	0.599532
piR-33382	GXN_564971	piR-hsa-23533	1122.91	0.411759	0.440386	0.934994	0.349792	0.599532
piR-47698	GXN_550052	piR-hsa-9855	1709.53	0.782256	0.83741	0.934138	0.350233	0.599957
piR-51514	GXN_555350	piR-hsa-14727	2449.46	-0.550232	0.589536	-0.93333	0.35065	0.60034
piR-41329	GXN_543151	piR-hsa-3510	133.952	-0.324401	0.347836	-0.932628	0.351012	0.600629
piR-31155	GXN_540743	piR-hsa-1294	16.8653	0.447381	0.480306	0.93145	0.351621	0.601008
piR-49426	GXN_551962	piR-hsa-11614	29.3052	-0.534849	0.57416	-0.931533	0.351578	0.601008
piR-30043	GXN_539619	piR-hsa-255	55.37	-0.364656	0.391983	-0.930285	0.352223	0.601045
piR-53448	GXN_557333	piR-hsa-16557	89.897	-0.258577	0.277868	-0.930577	0.352073	0.601045
piR-57135	GXN_561419	piR-hsa-20276	106.235	0.487831	0.524358	0.930339	0.352196	0.601045
piR-42416	GXN_544300	piR-hsa-4566	55.0441	-0.519524	0.559161	-0.929113	0.352831	0.601707
piR-42775	GXN_544768	piR-hsa-4998	46.9369	0.505814	0.544596	0.928789	0.352999	0.601707
piR-35304	GXN_569324	piR-hsa-27513	519.171	-0.681035	0.734376	-0.927366	0.353737	0.602633
piR-45010	GXN_547179	piR-hsa-7219	30.2076	-0.501904	0.541758	-0.926435	0.35422	0.603126
piR-61555	GXN_567325	piR-hsa-25690	28.9232	-0.467865	0.506036	-0.924569	0.35519	0.604115
piR-35177	GXN_569201	piR-hsa-27401	18.1728	-0.453162	0.490035	-0.924753	0.355094	0.604115
piR-34929	GXN_568833	piR-hsa-27065	3838.55	-0.562285	0.608446	-0.924133	0.355417	0.60417
piR-40437	GXN_542131	piR-hsa-2576	69.2749	-0.511646	0.555065	-0.921776	0.356645	0.604827
piR-42545	GXN_544410	piR-hsa-4666	22.6928	0.491185	0.532987	0.92157	0.356753	0.604827
piR-57138	GXN_561422	piR-hsa-20279	226.309	0.606032	0.657643	0.921522	0.356778	0.604827
piR-33690	GXN_565291	piR-hsa-23826	17.0952	-0.501623	0.543809	-0.922426	0.356306	0.604827
piR-60101	GXN_565726	piR-hsa-24223	20.9317	0.347606	0.377156	0.921652	0.35671	0.604827
piR-60173	GXN_565803	piR-hsa-24295	16.6147	-0.499108	0.54192	-0.920999	0.357051	0.60496
piR-39041	GXN_573401	piR-hsa-31261	25.8413	0.811028	0.881603	0.919947	0.3576	0.60556
piR-33161	GXN_564744	piR-hsa-23327	7649.53	0.612898	0.667428	0.918299	0.358462	0.606689
piR-44198	GXN_546232	piR-hsa-6349	35.0276	-0.597105	0.651085	-0.917092	0.359094	0.607097
piR-58148	GXN_562552	piR-hsa-21315	52.2968	-0.507058	0.552897	-0.917093	0.359094	0.607097
piR-54381	GXN_19668	piR-hsa-17560	285.867	-0.495944	0.542315	-0.914494	0.360457	0.60857
piR-31555	GXN_541257	piR-hsa-1766	25.7328	0.624519	0.68305	0.914309	0.360554	0.60857
piR-61644	GXN_567423	piR-hsa-25779	40708.9	-0.265071	0.289747	-0.914835	0.360278	0.60857
piR-45634	GXN_547815	piR-hsa-7796	18.999	0.437172	0.478658	0.91333	0.361069	0.609108
piR-30461	GXN_540023	piR-hsa-629	23.6898	0.423949	0.464474	0.912752	0.361373	0.60916
piR-42291	GXN_544164	piR-hsa-4441	42.1262	-0.639468	0.700768	-0.912524	0.361493	0.60916
piR-31038	GXN_540616	piR-hsa-1177	158312	-0.512893	0.563495	-0.9102	0.362717	0.610399
piR-43461	GXN_545458	piR-hsa-5641	75.6241	-0.518702	0.569996	-0.910009	0.362818	0.610399
piR-34432	GXN_568303	piR-hsa-26582	53.8917	-0.257086	0.282337	-0.910567	0.362524	0.610399
piR-56246	GXN_560473	piR-hsa-19416	18.5318	0.388139	0.426781	0.909456	0.363109	0.610559
piR-30369	GXN_539953	piR-hsa-566	17.7453	0.502017	0.552308	0.908943	0.36338	0.610683
piR-50889	GXN_554603	piR-hsa-14043	11466.1	-0.474115	0.522056	-0.908168	0.36379	0.611041
piR-60497	GXN_564312	piR-hsa-22932	20.0033	0.613609	0.67644	0.907116	0.364346	0.611644
piR-34536	GXN_568417	piR-hsa-26686	2226.84	-0.308932	0.341079	-0.905751	0.365067	0.612524
piR-32021	GXN_541714	piR-hsa-2189	19.6032	-0.492244	0.543809	-0.905177	0.365372	0.612703
piR-55782	GXN_559979	piR-hsa-18967	88.0721	-0.541572	0.59858	-0.904762	0.365591	0.61274
piR-39898	GXN_574265	piR-hsa-32056	66.6175	-0.347384	0.384758	-0.902864	0.366598	0.614097
piR-57307	GXN_561572	piR-hsa-20419	19.1292	0.482235	0.534731	0.901827	0.367149	0.614355
piR-33087	GXN_564663	piR-hsa-23253	25.4359	0.568128	0.629886	0.901953	0.367082	0.614355
piR-57143	GXN_561428	piR-hsa-20284	36.8562	0.496238	0.550859	0.900845	0.367671	0.614898
piR-44097	GXN_546121	piR-hsa-6248	71.7177	0.372379	0.414751	0.897838	0.369272	0.61691
piR-38335	GXN_572530	piR-hsa-30469	41.4331	-0.529067	0.589071	-0.898137	0.369113	0.61691
piR-61861	GXN_567643	piR-hsa-25981	39.4662	0.514717	0.573869	0.896924	0.369759	0.617393
piR-40419	GXN_542111	piR-hsa-2558	494.915	-0.486891	0.543996	-0.895027	0.370773	0.618419
piR-61594	GXN_567368	piR-hsa-25729	37.8177	-0.496834	0.554899	-0.895358	0.370595	0.618419
piR-38022	GXN_572207	piR-hsa-30170	21.1844	-0.433971	0.485702	-0.893494	0.371593	0.619122
piR-38679	GXN_572897	piR-hsa-30813	20.2017	0.507329	0.567636	0.893758	0.371451	0.619122
piR-54946	GXN_559028	piR-hsa-18110	16.5242	0.354924	0.398369	0.890943	0.37296	0.621066
piR-41299	GXN_543118	piR-hsa-3480	69.6799	0.517843	0.582258	0.889369	0.373805	0.62114
piR-49014	GXN_551555	piR-hsa-11231	20.6847	-0.355449	0.399498	-0.889741	0.373605	0.62114
piR-32361	GXN_552894	piR-hsa-12472	18.899	-0.378616	0.425631	-0.889539	0.373713	0.62114
piR-33050	GXN_564622	piR-hsa-23216	43.503	-0.528861	0.593992	-0.89035	0.373278	0.62114
piR-47415	GXN_549778	piR-hsa-9601	449.204	-0.56937	0.640474	-0.888982	0.374013	0.621153
piR-55584	GXN_559777	piR-hsa-18785	148.425	0.778068	0.877658	0.886527	0.375333	0.623013
piR-39199	GXN_573573	piR-hsa-31418	99.5388	0.665901	0.75168	0.885884	0.37568	0.623256
piR-43464	GXN_545461	piR-hsa-5644	44.0717	0.412728	0.466367	0.884985	0.376165	0.623726
piR-31650	GXN_541359	piR-hsa-1861	1503.54	-0.484975	0.549193	-0.88307	0.377199	0.623871
piR-42821	GXN_544818	piR-hsa-5044	27.0008	0.417726	0.473398	0.882398	0.377562	0.623871
piR-46767	GXN_549001	piR-hsa-8882	27.9319	-0.338573	0.38366	-0.882483	0.377516	0.623871
piR-32414	GXN_552951	piR-hsa-12525	1625.71	-0.375554	0.424902	-0.88386	0.376772	0.623871
piR-53936	GXN_557959	piR-hsa-17130	23.5147	-0.41423	0.469213	-0.882819	0.377334	0.623871
piR-60479	GXN_566137	piR-hsa-24601	187.87	0.542573	0.61501	0.882218	0.377659	0.623871
piR-61687	GXN_567470	piR-hsa-25822	29.9139	-0.30269	0.342658	-0.883358	0.377043	0.623871
piR-40252	GXN_541931	piR-hsa-2391	518.218	0.455818	0.517302	0.881145	0.378239	0.624498
piR-47633	GXN_549981	piR-hsa-9790	28.5228	-0.550118	0.624934	-0.880282	0.378706	0.624936
piR-40420	GXN_542112	piR-hsa-2559	482.3	-0.476372	0.542837	-0.877559	0.380183	0.626304
piR-43155	GXN_545144	piR-hsa-5349	48.58	0.278351	0.317172	0.877605	0.380158	0.626304
piR-33798	GXN_565409	piR-hsa-23934	33.1129	-0.392963	0.447941	-0.877265	0.380342	0.626304
piR-34719	GXN_568602	piR-hsa-26855	246.251	-0.657998	0.74988	-0.877471	0.380231	0.626304
piR-41800	GXN_543646	piR-hsa-3967	44.5005	0.523247	0.596997	0.876465	0.380777	0.626385
piR-44356	GXN_546406	piR-hsa-6507	30.961	-0.399234	0.455683	-0.876121	0.380964	0.626385
piR-44444	GXN_546499	piR-hsa-6595	17.3016	-0.317852	0.362973	-0.875689	0.381199	0.626385
piR-49905	GXN_552434	piR-hsa-12047	27.9024	-0.526069	0.600646	-0.875839	0.381117	0.626385
piR-45194	GXN_547379	piR-hsa-7401	38.3453	-0.370058	0.423525	-0.873758	0.38225	0.62778
piR-41255	GXN_543070	piR-hsa-3436	37.4803	0.350039	0.401341	0.872173	0.383114	0.628657
piR-33270	GXN_564274	piR-hsa-22897	24.9309	0.663149	0.760461	0.872035	0.383189	0.628657
NA	GXN_446947	NA	74.1886	0.520427	0.598643	0.869345	0.384658	0.629736
piR-56288	GXN_560519	piR-hsa-19458	27.2197	0.415839	0.47817	0.869647	0.384493	0.629736
piR-37182	GXN_571396	piR-hsa-29416	50.0575	-0.380953	0.437994	-0.869768	0.384427	0.629736
piR-38968	GXN_573322	piR-hsa-31188	35.4048	-0.686407	0.788708	-0.870294	0.38414	0.629736
piR-42708	GXN_544586	piR-hsa-4829	70.2029	-0.364354	0.419335	-0.868885	0.38491	0.629816
piR-45120	GXN_547300	piR-hsa-7327	120.744	-0.384176	0.442523	-0.86815	0.385312	0.630142
piR-44329	GXN_546376	piR-hsa-6480	21.8431	0.620033	0.715387	0.86671	0.386101	0.630359
piR-47459	GXN_549823	piR-hsa-9645	33.458	0.405444	0.469174	0.864166	0.387497	0.630359
piR-48593	GXN_550986	piR-hsa-10707	40.3871	0.458939	0.531205	0.863958	0.387611	0.630359
piR-51005	GXN_554699	piR-hsa-14130	16.2598	-0.416805	0.480453	-0.867526	0.385654	0.630359
piR-53544	GXN_557549	piR-hsa-16752	20.6806	-0.322124	0.3729	-0.863834	0.387679	0.630359
piR-53919	GXN_557940	piR-hsa-17113	102.895	0.414849	0.47889	0.866272	0.386341	0.630359
piR-59547	GXN_563998	piR-hsa-22640	16.1166	0.391428	0.453046	0.863991	0.387593	0.630359
piR-33356	GXN_564942	piR-hsa-23507	16.5487	-0.460677	0.531568	-0.866639	0.38614	0.630359
piR-34113	GXN_567970	piR-hsa-26279	72.8189	0.562652	0.649822	0.865854	0.38657	0.630359
piR-34630	GXN_568520	piR-hsa-26780	26.3917	-0.499173	0.577467	-0.864418	0.387358	0.630359
piR-39697	GXN_574062	piR-hsa-31871	27.1736	0.413097	0.477378	0.865346	0.386849	0.630359
piR-31368	GXN_541070	piR-hsa-1593	30.1593	-0.461702	0.535311	-0.862493	0.388416	0.630897
piR-47167	GXN_549525	piR-hsa-9367	34.0677	-0.444818	0.515719	-0.862519	0.388402	0.630897
piR-42720	GXN_544599	piR-hsa-4841	33.3845	0.313263	0.363691	0.861343	0.389049	0.631594
piR-43834	GXN_545851	piR-hsa-6000	139.561	0.45808	0.533088	0.859295	0.390178	0.632195
piR-32550	GXN_553099	piR-hsa-12661	33.9114	0.320863	0.373447	0.859194	0.390234	0.632195
piR-51493	GXN_555217	piR-hsa-14603	46.4428	0.503813	0.58565	0.860262	0.389644	0.632195
piR-55420	GXN_559501	piR-hsa-18541	30.104	-0.380153	0.44226	-0.859571	0.390026	0.632195
piR-41586	GXN_543429	piR-hsa-3767	38.7673	0.757241	0.883118	0.857463	0.391189	0.633108
piR-58953	GXN_563398	piR-hsa-22089	61.0085	0.44372	0.517498	0.857433	0.391205	0.633108
piR-57721	GXN_562007	piR-hsa-20818	32.8842	-0.566307	0.66118	-0.85651	0.391716	0.633511
piR-34950	GXN_568856	piR-hsa-27086	341.586	0.596869	0.697077	0.856245	0.391862	0.633511
piR-41056	GXN_542868	piR-hsa-3252	6528.01	-0.4572	0.534377	-0.855576	0.392232	0.633681
piR-32883	GXN_553576	piR-hsa-13094	2895.99	0.609958	0.713137	0.855316	0.392376	0.633681
piR-47499	GXN_549835	piR-hsa-9656	30.0085	0.722386	0.846492	0.853388	0.393444	0.634749
piR-61645	GXN_567424	piR-hsa-25780	37630.5	-0.236293	0.277009	-0.853015	0.393651	0.634749
piR-36494	GXN_570539	piR-hsa-28629	297.17	-0.337557	0.395583	-0.853317	0.393484	0.634749
piR-44305	GXN_546350	piR-hsa-6456	118.746	-0.592038	0.695952	-0.850688	0.394943	0.636171
piR-34582	GXN_568467	piR-hsa-26732	57.1211	0.480999	0.56535	0.8508	0.394881	0.636171
piR-42116	GXN_543990	piR-hsa-4281	34.226	0.413486	0.486289	0.850289	0.395165	0.636199
piR-45060	GXN_547234	piR-hsa-7267	28.8647	-0.431543	0.508272	-0.849039	0.39586	0.636988
piR-36969	GXN_571056	piR-hsa-29103	204.252	-0.537032	0.633162	-0.848174	0.396341	0.637431
piR-41956	GXN_543815	piR-hsa-4121	18.6013	0.347684	0.410525	0.846925	0.397037	0.637763
piR-57947	GXN_562348	piR-hsa-21131	74.2973	-0.462072	0.545327	-0.84733	0.396811	0.637763
piR-33660	GXN_565258	piR-hsa-23796	601.22	0.481528	0.568961	0.846329	0.397369	0.637763
piR-37183	GXN_571397	piR-hsa-29417	58.5381	-0.350913	0.414598	-0.846392	0.397334	0.637763
piR-61840	GXN_567619	piR-hsa-25960	24.2336	-0.462184	0.547065	-0.844844	0.398198	0.638433
piR-34379	GXN_568246	piR-hsa-26529	103.995	-0.462317	0.547174	-0.844918	0.398157	0.638433
piR-53748	GXN_557406	piR-hsa-16624	210.31	-0.357904	0.424279	-0.843558	0.398916	0.639255
piR-36876	GXN_570955	piR-hsa-29010	27.3884	0.501669	0.595088	0.843016	0.399219	0.63941
piR-41951	GXN_543810	piR-hsa-4116	27.3478	-0.672075	0.798141	-0.842051	0.39976	0.639615
piR-59380	GXN_563847	piR-hsa-22502	26.0471	0.268565	0.318929	0.842084	0.399741	0.639615
piR-45289	GXN_547451	piR-hsa-7467	58.3	-0.454828	0.54068	-0.841213	0.400229	0.640036
piR-41614	GXN_543459	piR-hsa-3795	146.68	0.374347	0.446276	0.838824	0.401568	0.640688
piR-43596	GXN_545590	piR-hsa-5762	18.5113	-0.333479	0.397131	-0.839719	0.401066	0.640688
piR-45751	GXN_547928	piR-hsa-7898	103.557	-0.484825	0.578203	-0.838503	0.401748	0.640688
piR-47497	GXN_549833	piR-hsa-9654	29.8036	0.709974	0.847686	0.837543	0.402288	0.640688
piR-32679	GXN_553241	piR-hsa-12790	37219.5	-0.24434	0.29157	-0.838017	0.402021	0.640688
piR-50417	GXN_554136	piR-hsa-13614	40.695	-0.620232	0.740237	-0.837882	0.402097	0.640688
piR-62009	GXN_567805	piR-hsa-26129	28.1794	-0.571811	0.681881	-0.838579	0.401706	0.640688
piR-39401	GXN_573776	piR-hsa-31605	85.9926	0.645251	0.768839	0.839253	0.401327	0.640688
piR-55242	GXN_557481	piR-hsa-16692	38.5283	0.252847	0.302531	0.835773	0.403283	0.641652
piR-58326	GXN_562731	piR-hsa-21479	53.5207	-0.514462	0.615583	-0.835731	0.403306	0.641652
piR-34250	GXN_568105	piR-hsa-26400	439.099	-0.491489	0.588841	-0.834673	0.403902	0.641677
piR-34382	GXN_568249	piR-hsa-26532	65.7054	0.639144	0.765618	0.834808	0.403826	0.641677
piR-38176	GXN_572373	piR-hsa-30324	31.3059	-0.50396	0.603833	-0.834601	0.403942	0.641677
piR-30739	GXN_540309	piR-hsa-892	16.2183	0.438169	0.526693	0.831925	0.405452	0.643087
piR-49123	GXN_551670	piR-hsa-11340	49.4209	0.660168	0.793154	0.832333	0.405221	0.643087
piR-32169	GXN_552701	piR-hsa-12296	29.3221	-0.353895	0.425957	-0.830824	0.406073	0.643087
piR-52531	GXN_556420	piR-hsa-15715	545.25	0.623457	0.750062	0.831207	0.405857	0.643087
piR-55349	GXN_559423	piR-hsa-18470	19.3273	-0.407071	0.489758	-0.831166	0.40588	0.643087
piR-33372	GXN_564960	piR-hsa-23523	10918.5	-0.519891	0.625497	-0.831165	0.405881	0.643087
piR-45450	GXN_547628	piR-hsa-7628	28.9367	-0.54509	0.657297	-0.82929	0.40694	0.643583
piR-46908	GXN_549154	piR-hsa-9023	484.181	-0.29387	0.354884	-0.828071	0.40763	0.643583
piR-51276	GXN_554979	piR-hsa-14386	69.4038	-0.391846	0.472404	-0.829472	0.406837	0.643583
piR-59892	GXN_564482	piR-hsa-23087	20.8745	-0.369153	0.445339	-0.828927	0.407146	0.643583
piR-33226	GXN_564815	piR-hsa-23392	45.3833	0.456474	0.551043	0.828381	0.407455	0.643583
piR-61647	GXN_567426	piR-hsa-25782	15886.5	-0.215662	0.260308	-0.828488	0.407394	0.643583
piR-43247	GXN_545227	piR-hsa-5427	29.1435	0.575368	0.696702	0.825845	0.408892	0.645247
piR-42027	GXN_543892	piR-hsa-4192	214.524	-0.454416	0.551054	-0.824631	0.409581	0.645816
piR-43265	GXN_545246	piR-hsa-5445	24.2899	-0.451583	0.549096	-0.822412	0.410843	0.645816
piR-45662	GXN_547846	piR-hsa-7824	25.3841	0.304825	0.370439	0.822874	0.41058	0.645816
piR-49401	GXN_551937	piR-hsa-11589	45.1892	-0.388476	0.471519	-0.823881	0.410007	0.645816
piR-32214	GXN_552750	piR-hsa-12340	91.0667	0.310119	0.376761	0.82312	0.41044	0.645816
piR-59507	GXN_562147	piR-hsa-20946	20.3212	-0.47233	0.573984	-0.822897	0.410566	0.645816
piR-33405	GXN_564996	piR-hsa-23556	22.6586	-0.356189	0.432196	-0.824137	0.409862	0.645816
piR-60727	GXN_566392	piR-hsa-24834	19.4781	0.289794	0.352427	0.82228	0.410917	0.645816
piR-55419	GXN_559500	piR-hsa-18540	29.8945	-0.363088	0.441871	-0.821705	0.411245	0.646004
piR-41172	GXN_542996	piR-hsa-3368	908.545	-0.408859	0.499418	-0.818672	0.412974	0.646756
piR-43771	GXN_545782	piR-hsa-5937	224.408	-0.546078	0.66616	-0.819739	0.412365	0.646756
piR-50848	GXN_554558	piR-hsa-14002	22.0647	0.466892	0.569045	0.820483	0.411941	0.646756
piR-57767	GXN_562057	piR-hsa-20864	73.9025	0.350406	0.42772	0.819242	0.412648	0.646756
piR-59425	GXN_563897	piR-hsa-22547	151.408	0.415495	0.507334	0.818977	0.412799	0.646756
piR-33049	GXN_564621	piR-hsa-23215	61.4808	0.326388	0.398442	0.81916	0.412695	0.646756
piR-56559	GXN_560801	piR-hsa-19715	22.8541	0.650346	0.795207	0.817833	0.413453	0.647179
piR-50794	GXN_554499	piR-hsa-13948	26.8452	-0.446361	0.546572	-0.816656	0.414125	0.647253
piR-51096	GXN_554799	piR-hsa-14220	30.2719	0.520258	0.636763	0.817036	0.413908	0.647253
piR-33162	GXN_564745	piR-hsa-23328	66.8005	0.473389	0.579546	0.816827	0.414027	0.647253
piR-30846	GXN_540427	piR-hsa-999	544.791	-0.551912	0.67624	-0.816149	0.414415	0.64738
piR-40380	GXN_542070	piR-hsa-2519	1124.9	-0.497049	0.612569	-0.811417	0.417126	0.647908
piR-40503	GXN_542188	piR-hsa-2627	17.3264	0.602412	0.741343	0.812596	0.41645	0.647908
piR-42412	GXN_544296	piR-hsa-4562	28.6206	0.392584	0.484021	0.811088	0.417315	0.647908
piR-43211	GXN_545205	piR-hsa-5405	31.2465	0.524015	0.644245	0.813379	0.416001	0.647908
piR-44983	GXN_547150	piR-hsa-7192	26.9749	-0.514262	0.63445	-0.810565	0.417616	0.647908
piR-45881	GXN_548070	piR-hsa-8028	26.0206	0.609094	0.752323	0.809618	0.41816	0.647908
piR-47190	GXN_549550	piR-hsa-9390	60.3487	0.719232	0.884498	0.813153	0.41613	0.647908
piR-48792	GXN_551205	piR-hsa-10906	29.7222	0.621683	0.76525	0.812393	0.416566	0.647908
piR-32882	GXN_553575	piR-hsa-13093	16.9475	-0.488906	0.603954	-0.809508	0.418223	0.647908
piR-54280	GXN_558316	piR-hsa-17459	30.4342	-0.396515	0.487204	-0.813857	0.415727	0.647908
piR-54962	GXN_559046	piR-hsa-18126	21.7961	0.314773	0.387251	0.812839	0.416311	0.647908
piR-57403	GXN_561677	piR-hsa-20515	27.1925	-0.376674	0.46539	-0.809372	0.418301	0.647908
[truncated: 30,195 more rows]

## Sheet: iPSCs
piRNA name (RNAdb2.0)	piRNA ID (Genomatix)	piRNA name (piRBase)	baseMean	log2FoldChange	lfcSE	stat	pvalue	padj
piR-33493	GXN_565092	piR-hsa-23644	741.957	2.7568	0.387822	7.1084	1.17399e-12	7.02161e-09
piR-35119	GXN_569137	piR-hsa-27343	1314.13	2.37581	0.384408	6.18043	6.39264e-10	1.91172e-06
piR-50835	GXN_554544	piR-hsa-13989	162.155	2.05874	0.387944	5.30679	1.1157e-07	0.000222433
piR-30757	GXN_540329	piR-hsa-910	183.748	1.99447	0.387529	5.14664	2.65199e-07	0.000318261
piR-41015	GXN_542823	piR-hsa-3211	60.6206	-2.00823	0.390249	-5.14603	2.6606e-07	0.000318261
piR-49937	GXN_552468	piR-hsa-12079	13.8401	-1.68056	0.338302	-4.96763	6.77749e-07	0.000619141
piR-53235	GXN_555307	piR-hsa-14688	19.4304	1.83136	0.369625	4.95464	7.24626e-07	0.000619141
piR-52846	GXN_556724	piR-hsa-15999	154.043	-1.57855	0.32029	-4.92851	8.28576e-07	0.000619464
piR-61739	GXN_567525	piR-hsa-25874	33.512	-1.68008	0.343098	-4.89678	9.74186e-07	0.000647401
piR-42457	GXN_542508	piR-hsa-2923	44.5476	-1.88195	0.387022	-4.86264	1.15829e-06	0.000692774
piR-41013	GXN_542821	piR-hsa-3209	64.1813	-1.84093	0.390027	-4.72001	2.35838e-06	0.00109611
piR-60422	GXN_566075	piR-hsa-24544	30.4251	-0.921666	0.195306	-4.71909	2.36898e-06	0.00109611
piR-35181	GXN_569205	piR-hsa-27405	36.097	-1.78675	0.378715	-4.71794	2.38244e-06	0.00109611
piR-33637	GXN_565233	piR-hsa-23773	1024.86	-1.72383	0.369246	-4.66853	3.0336e-06	0.001296
piR-59965	GXN_564562	piR-hsa-23160	80.9601	-1.79313	0.389004	-4.60953	4.03572e-06	0.00160918
piR-60483	GXN_566142	piR-hsa-24605	15.0557	-1.6652	0.362947	-4.58799	4.47525e-06	0.0016729
piR-38519	GXN_572726	piR-hsa-30653	33.1012	-1.78242	0.390116	-4.56896	4.90148e-06	0.00172446
piR-41026	GXN_542835	piR-hsa-3222	22.7189	-1.74973	0.384502	-4.55063	5.34855e-06	0.0017772
piR-42945	GXN_544951	piR-hsa-5168	435.022	-1.68929	0.37492	-4.50574	6.61419e-06	0.00197797
piR-40014	GXN_574360	piR-hsa-32142	248.02	1.59245	0.353222	4.50837	6.53284e-06	0.00197797
piR-60448	GXN_566103	piR-hsa-24570	56.4612	-1.57219	0.350336	-4.48767	7.2006e-06	0.0020508
piR-42944	GXN_544950	piR-hsa-5167	434.052	-1.68106	0.375604	-4.47561	7.61925e-06	0.0020714
piR-57735	GXN_562022	piR-hsa-20832	21.0822	-1.67446	0.377088	-4.4405	8.97512e-06	0.00233392
piR-30030	GXN_539604	piR-hsa-242	1022.2	1.71138	0.390077	4.38729	1.14772e-05	0.00273967
piR-58485	GXN_562905	piR-hsa-21638	108.49	-1.69789	0.386456	-4.39348	1.11551e-05	0.00273967
piR-59335	GXN_563798	piR-hsa-22457	13.2893	-1.53037	0.349462	-4.37924	1.19096e-05	0.00273967
piR-60496	GXN_564311	piR-hsa-22931	19.0043	-1.37153	0.315201	-4.35128	1.35345e-05	0.00299814
piR-51649	GXN_555496	piR-hsa-14862	80.472	-1.68676	0.388413	-4.34269	1.40747e-05	0.00300646
piR-52393	GXN_556287	piR-hsa-15592	24.728	-1.68668	0.3905	-4.31927	1.56546e-05	0.00312101
piR-52698	GXN_556598	piR-hsa-15881	27.5437	1.68245	0.388895	4.32622	1.5169e-05	0.00312101
piR-53712	GXN_557732	piR-hsa-16920	57.9612	-1.58233	0.367358	-4.30732	1.65244e-05	0.00318815
piR-52342	GXN_556232	piR-hsa-15541	74.6969	-1.67403	0.38949	-4.298	1.72344e-05	0.00322121
piR-32547	GXN_553096	piR-hsa-12658	48.6731	-1.65027	0.387827	-4.25518	2.08884e-05	0.00378587
piR-51090	GXN_554792	piR-hsa-14214	15.4059	-1.6481	0.388907	-4.23778	2.25736e-05	0.00397096
piR-45229	GXN_546813	piR-hsa-6885	58.7736	-0.939549	0.225147	-4.17305	3.00545e-05	0.00513588
piR-42927	GXN_544931	piR-hsa-5150	288.541	-1.54438	0.370949	-4.16333	3.13638e-05	0.00517526
piR-57924	GXN_562323	piR-hsa-21108	16.0107	1.3457	0.323967	4.15381	3.26978e-05	0.00517526
piR-38165	GXN_572361	piR-hsa-30313	13.1963	-1.44332	0.347575	-4.15254	3.28808e-05	0.00517526
piR-42282	GXN_544154	piR-hsa-4432	1793.75	-1.53542	0.37291	-4.1174	3.83164e-05	0.00578645
piR-48442	GXN_550836	piR-hsa-10570	37.133	-1.58543	0.385269	-4.11511	3.86989e-05	0.00578645
piR-30965	GXN_540540	piR-hsa-1104	40.0538	-1.59007	0.389869	-4.07847	4.53333e-05	0.00645568
piR-47497	GXN_549833	piR-hsa-9654	52.632	-1.5697	0.384598	-4.08142	4.47615e-05	0.00645568
piR-30373	GXN_539958	piR-hsa-570	26.7912	-1.58022	0.388277	-4.06983	4.70476e-05	0.00654399
piR-47499	GXN_549835	piR-hsa-9656	52.8365	-1.54991	0.384885	-4.02694	5.6508e-05	0.00768123
piR-30136	GXN_539719	piR-hsa-348	45.3466	-1.53582	0.383822	-4.00138	6.29734e-05	0.0080137
piR-51626	GXN_555471	piR-hsa-14839	594.276	-1.49267	0.372673	-4.0053	6.19377e-05	0.0080137
piR-60440	GXN_566094	piR-hsa-24562	69.5603	-1.36302	0.340028	-4.00856	6.10914e-05	0.0080137
piR-43395	GXN_545387	piR-hsa-5575	36.2688	1.53231	0.383839	3.99207	6.54992e-05	0.00816147
piR-43764	GXN_545774	piR-hsa-5930	42.221	-1.23165	0.310529	-3.96629	7.30003e-05	0.0089105
piR-43765	GXN_545775	piR-hsa-5931	42.2228	-1.22853	0.310556	-3.95591	7.62452e-05	0.00912045
piR-60431	GXN_566085	piR-hsa-24553	17.5289	-1.29107	0.326919	-3.9492	7.84113e-05	0.00919565
piR-51045	GXN_554743	piR-hsa-14170	70.9963	1.1236	0.285727	3.93244	8.40895e-05	0.00967191
piR-52286	GXN_556172	piR-hsa-15485	31.3958	-1.52649	0.388769	-3.92647	8.62019e-05	0.0097278
piR-53170	GXN_557060	piR-hsa-16308	40.8939	-1.49927	0.382359	-3.9211	8.81446e-05	0.00976283
piR-32095	GXN_552623	piR-hsa-12222	52.0011	-1.22681	0.317019	-3.86983	0.000108912	0.0118437
piR-50084	GXN_553793	piR-hsa-13295	46.2847	-1.20875	0.314569	-3.84254	0.000121766	0.0130051
piR-32793	GXN_553477	piR-hsa-13004	14830.5	-1.38928	0.362623	-3.8312	0.000127522	0.0133809
piR-48831	GXN_551248	piR-hsa-10945	57.6733	1.43704	0.376375	3.8181	0.000134483	0.0136329
piR-36039	GXN_570061	piR-hsa-28188	14420.7	1.20626	0.315845	3.81914	0.000133916	0.0136329
piR-42379	GXN_544259	piR-hsa-4529	66.0994	-1.0202	0.267932	-3.80767	0.000140281	0.0137821
piR-33621	GXN_565216	piR-hsa-23757	23.9804	-1.3682	0.359374	-3.80718	0.000140563	0.0137821
piR-36040	GXN_570062	piR-hsa-28189	13966.4	1.21595	0.320315	3.79612	0.00014698	0.0141788
piR-42460	GXN_542511	piR-hsa-2926	23.7441	-1.06315	0.281404	-3.77803	0.000158074	0.0143309
piR-42524	GXN_544387	piR-hsa-4645	34.4392	-1.08081	0.286085	-3.77792	0.000158141	0.0143309
piR-60472	GXN_566130	piR-hsa-24594	98.6502	-1.36358	0.360557	-3.78187	0.000155655	0.0143309
piR-36038	GXN_570060	piR-hsa-28187	14127.1	1.20927	0.319725	3.78223	0.00015543	0.0143309
piR-51096	GXN_554799	piR-hsa-14220	17.2286	-1.06695	0.282894	-3.77156	0.000162229	0.0144819
piR-31859	GXN_541551	piR-hsa-2041	24.5699	-1.33323	0.355241	-3.75302	0.000174714	0.0151444
piR-39041	GXN_573401	piR-hsa-31261	40.0503	-1.3999	0.372839	-3.75471	0.000173544	0.0151444
piR-53419	GXN_557301	piR-hsa-16528	22.45	-0.75962	0.203061	-3.74085	0.000183397	0.01567
piR-42179	GXN_544058	piR-hsa-4344	36.4831	-1.07925	0.28959	-3.72681	0.000193922	0.0163359
piR-44957	GXN_547138	piR-hsa-7181	58.154	-1.38341	0.373452	-3.70438	0.000211908	0.0169512
piR-52935	GXN_556820	piR-hsa-16088	158.994	-1.37079	0.370124	-3.7036	0.000212564	0.0169512
piR-61803	GXN_567579	piR-hsa-25924	103.331	-1.33523	0.35968	-3.71228	0.000205403	0.0169512
piR-37236	GXN_571423	piR-hsa-29441	40.1121	1.43516	0.387221	3.70631	0.000210299	0.0169512
piR-60418	GXN_566071	piR-hsa-24540	410.908	-1.37355	0.371266	-3.69965	0.000215896	0.0169905
piR-33695	GXN_565296	piR-hsa-23831	21.3838	-1.35834	0.367976	-3.69138	0.000223041	0.0173248
piR-44560	GXN_546606	piR-hsa-6696	35.6665	-1.43236	0.388745	-3.68456	0.000229095	0.0173445
piR-49645	GXN_552186	piR-hsa-11817	4606.84	1.37863	0.373944	3.68674	0.000227143	0.0173445
piR-60428	GXN_566081	piR-hsa-24550	1515.55	-1.38837	0.377415	-3.67863	0.000234493	0.0175313
piR-42491	GXN_544351	piR-hsa-4612	99.877	-0.778185	0.213147	-3.65092	0.000261301	0.018813
piR-42811	GXN_544807	piR-hsa-5034	759.296	-1.36923	0.37467	-3.65451	0.000257675	0.018813
piR-55561	GXN_559752	piR-hsa-18762	17.593	-1.41859	0.388859	-3.64807	0.000264219	0.018813
piR-58633	GXN_563067	piR-hsa-21785	22.0476	-1.23917	0.339293	-3.6522	0.000260007	0.018813
piR-40921	GXN_542737	piR-hsa-3133	18.6526	1.42068	0.390018	3.64259	0.000269905	0.0189918
piR-40241	GXN_541920	piR-hsa-2380	42.2459	-0.565389	0.156837	-3.60494	0.000312228	0.0217144
piR-30488	GXN_540051	piR-hsa-656	18.429	0.962606	0.267908	3.59305	0.000326835	0.02219
piR-42486	GXN_544345	piR-hsa-4607	111.14	-1.27863	0.355586	-3.59583	0.000323353	0.02219
piR-59363	GXN_563829	piR-hsa-22485	30.8707	1.40054	0.390081	3.59038	0.000330197	0.02219
piR-49673	GXN_552215	piR-hsa-11845	33.4584	1.06371	0.296654	3.5857	0.000336182	0.0223411
piR-42475	GXN_542527	piR-hsa-2941	24.4843	-0.900309	0.251365	-3.58168	0.000341393	0.0224381
piR-42973	GXN_544621	piR-hsa-4861	109.599	-1.34531	0.376802	-3.57033	0.000356537	0.0229296
piR-52611	GXN_556505	piR-hsa-15795	16.4426	-1.27389	0.356541	-3.57291	0.000353038	0.0229296
piR-46021	GXN_548223	piR-hsa-8168	17.6873	1.24956	0.351426	3.55569	0.000376986	0.0233652
piR-32146	GXN_552677	piR-hsa-12273	39.9892	-1.36146	0.383042	-3.55433	0.000378938	0.0233652
piR-55529	GXN_559716	piR-hsa-24	17.6272	-1.38358	0.389041	-3.55638	0.000375997	0.0233652
piR-55697	GXN_559901	piR-hsa-18896	17.6272	-1.38358	0.389041	-3.55638	0.000375997	0.0233652
piR-42504	GXN_544365	piR-hsa-4625	45.0941	-1.17476	0.331268	-3.54626	0.000390742	0.0236063
piR-33411	GXN_565003	piR-hsa-23562	23.6304	-1.18702	0.334506	-3.54858	0.000387314	0.0236063
piR-42505	GXN_544366	piR-hsa-4626	48.4813	-1.13665	0.322589	-3.52352	0.00042585	0.0254701
piR-58184	GXN_562592	piR-hsa-21351	38.8408	-1.36937	0.389287	-3.51763	0.00043542	0.0257846
piR-48872	GXN_551291	piR-hsa-10986	16.3259	1.2798	0.364279	3.51324	0.000442675	0.0259572
piR-30561	GXN_540131	piR-hsa-729	45.117	-1.32095	0.37751	-3.49911	0.00046681	0.0268461
piR-35000	GXN_569007	piR-hsa-27224	46.9296	-1.28731	0.367844	-3.49959	0.000465968	0.0268461
piR-34091	GXN_567946	piR-hsa-26257	70.8208	-1.28753	0.369135	-3.48797	0.000486704	0.0276695
piR-36969	GXN_571056	piR-hsa-29103	38.655	1.33155	0.381975	3.48596	0.000490381	0.0276695
piR-31780	GXN_541467	piR-hsa-1962	422.528	-1.12635	0.324042	-3.47594	0.000509059	0.0284549
piR-60389	GXN_566039	piR-hsa-24511	35.1177	-0.846874	0.245535	-3.44909	0.000562477	0.030864
piR-60412	GXN_566065	piR-hsa-24534	57.9423	-1.31963	0.382383	-3.45106	0.00055838	0.030864
piR-60099	GXN_565723	piR-hsa-24221	18.9223	-1.20465	0.350594	-3.43603	0.000590313	0.0320969
piR-57472	GXN_561751	piR-hsa-20584	13.5327	-0.888927	0.260575	-3.4114	0.000646297	0.0348244
piR-51121	GXN_554826	piR-hsa-14245	25.5725	-0.695019	0.204114	-3.40506	0.000661487	0.0353246
piR-38287	GXN_572477	piR-hsa-30421	53.5114	-1.17054	0.344731	-3.39553	0.000684965	0.0362547
piR-51518	GXN_555354	piR-hsa-14731	69.175	0.756105	0.223568	3.38199	0.000719635	0.037589
piR-55851	GXN_560055	piR-hsa-19036	13.1757	0.783634	0.231789	3.3808	0.000722745	0.037589
piR-47209	GXN_549571	piR-hsa-9409	746.379	1.14519	0.339457	3.37358	0.000741977	0.0379296
piR-33771	GXN_565380	piR-hsa-23907	18.332	1.03443	0.306611	3.37373	0.000741559	0.0379296
piR-42730	GXN_544719	piR-hsa-4953	274.858	-1.1119	0.331488	-3.35428	0.000795732	0.0386478
piR-42947	GXN_544953	piR-hsa-5170	15.85	-1.2021	0.358822	-3.35014	0.00080772	0.0386478
piR-44993	GXN_547161	piR-hsa-7202	31.6076	-1.27797	0.38135	-3.35117	0.000804714	0.0386478
piR-45354	GXN_547523	piR-hsa-7532	261.943	0.723913	0.215196	3.36398	0.00076828	0.0386478
piR-48716	GXN_551121	piR-hsa-10830	26.7055	-1.31124	0.390036	-3.36184	0.000774239	0.0386478
piR-32630	GXN_553187	piR-hsa-12741	29.6473	-1.15681	0.344684	-3.35615	0.000790357	0.0386478
piR-60405	GXN_566057	piR-hsa-24527	13.9432	-1.28133	0.381621	-3.3576	0.000786216	0.0386478
piR-37370	GXN_571566	piR-hsa-29575	25.5588	-0.988581	0.294178	-3.36049	0.000778055	0.0386478
piR-58198	GXN_562607	piR-hsa-21365	707.552	-1.09781	0.329523	-3.33152	0.000863737	0.0410001
piR-30682	GXN_539478	piR-hsa-194	24.7618	-1.12906	0.339236	-3.32823	0.000873983	0.0410918
piR-37148	GXN_571360	piR-hsa-29382	80.8895	1.25696	0.377861	3.32651	0.000879409	0.0410918
piR-42264	GXN_544134	piR-hsa-4414	420.941	-1.19206	0.3586	-3.32419	0.000886759	0.041114
piR-42353	GXN_544232	piR-hsa-4503	20.1546	1.21505	0.366454	3.31569	0.000914159	0.0416101
piR-32319	GXN_552848	piR-hsa-12431	24.8636	0.991764	0.299227	3.31442	0.00091833	0.0416101
piR-37774	GXN_571957	piR-hsa-29936	42.7421	1.2492	0.376856	3.31478	0.000917146	0.0416101
piR-50019	GXN_552541	piR-hsa-12146	19.1759	-1.23627	0.373394	-3.3109	0.000929973	0.0418208
piR-57177	GXN_561464	piR-hsa-20318	92.7749	1.2766	0.386349	3.30428	0.000952219	0.0425017
piR-58549	GXN_562974	piR-hsa-21701	21.7184	-1.13832	0.345406	-3.2956	0.000982124	0.0435117
piR-45435	GXN_547612	piR-hsa-7613	16.8407	-1.13288	0.344439	-3.28907	0.0010052	0.0442064
piR-35482	GXN_568929	piR-hsa-27153	27.5516	1.04825	0.319065	3.28538	0.00101846	0.0444631
piR-60357	GXN_566004	piR-hsa-24479	157.089	-0.84666	0.258143	-3.27981	0.00103876	0.0446966
piR-60447	GXN_566102	piR-hsa-24569	50.3751	-0.957419	0.291897	-3.27999	0.00103811	0.0446966
piR-32939	GXN_553634	piR-hsa-13150	25.1075	1.1493	0.350752	3.27666	0.00105042	0.0448753
piR-47336	GXN_549694	piR-hsa-9522	21.3825	1.26328	0.386799	3.26597	0.00109088	0.0456264
piR-59850	GXN_564435	piR-hsa-23045	21.6943	-0.591969	0.181127	-3.26826	0.00108212	0.0456264
piR-34815	GXN_568708	piR-hsa-26951	17.7068	1.27251	0.3895	3.26703	0.00108681	0.0456264
piR-32348	GXN_552879	piR-hsa-12459	16.3961	1.27143	0.389644	3.26305	0.00110222	0.0457803
piR-58290	GXN_562691	piR-hsa-21443	60.3482	-1.27239	0.390387	-3.2593	0.00111688	0.0460693
piR-47865	GXN_550220	piR-hsa-10008	297.354	-0.69959	0.214824	-3.25658	0.00112762	0.0461704
piR-50757	GXN_554458	piR-hsa-13911	40.0219	-0.898245	0.27614	-3.25286	0.00114249	0.0461704
piR-60416	GXN_566069	piR-hsa-24538	428.511	-1.17794	0.36192	-3.2547	0.00113514	0.0461704
piR-44333	GXN_546381	piR-hsa-6484	20.3162	-1.00121	0.308134	-3.24927	0.00115702	0.0464437
piR-48655	GXN_551054	piR-hsa-10769	70.7212	1.19631	0.36886	3.24325	0.00118175	0.0471083
piR-37882	GXN_572072	piR-hsa-30044	24.5198	1.16422	0.35917	3.24143	0.00118933	0.0471083
piR-41014	GXN_542822	piR-hsa-3210	35.4299	-1.25463	0.387573	-3.23714	0.00120733	0.0471965
piR-42265	GXN_544135	piR-hsa-4415	148.916	-1.09058	0.336879	-3.23732	0.0012066	0.0471965
piR-30191	GXN_539763	piR-hsa-388	116.056	-0.592324	0.183258	-3.23218	0.00122849	0.0473663
piR-33472	GXN_565069	piR-hsa-23623	119.617	1.07335	0.332249	3.23057	0.00123544	0.0473663
piR-34901	GXN_568802	piR-hsa-27037	64.0063	-0.715129	0.221127	-3.23402	0.00122062	0.0473663
piR-40027	GXN_541720	piR-hsa-2195	87.282	-0.769316	0.238685	-3.22314	0.00126792	0.048302
piR-41012	GXN_542820	piR-hsa-3208	81.4614	-1.16162	0.361058	-3.21728	0.00129413	0.0489884
piR-51990	GXN_555235	piR-hsa-14620	65.8933	1.15196	0.36061	3.19447	0.00140089	0.0526962
piR-41995	GXN_543858	piR-hsa-4160	15.4383	-1.23717	0.388092	-3.18781	0.00143352	0.0535869
piR-48095	GXN_550454	piR-hsa-10223	13.6666	-1.22805	0.385972	-3.18171	0.00146409	0.0543896
piR-42925	GXN_544929	piR-hsa-5148	37.8423	-1.21827	0.384096	-3.17178	0.00151507	0.0559359
piR-54700	GXN_558774	piR-hsa-17878	112.752	-0.898205	0.284712	-3.15478	0.00160617	0.0589355
piR-55200	GXN_559275	piR-hsa-18335	17.6782	-1.20688	0.38358	-3.14635	0.00165325	0.0602932
piR-38423	GXN_572623	piR-hsa-30557	97.9153	-1.21885	0.387892	-3.14225	0.00167655	0.0607725
piR-31144	GXN_540731	piR-hsa-1283	15.7423	-0.750638	0.239416	-3.13529	0.00171685	0.0611218
piR-40873	GXN_542685	piR-hsa-3085	46.8555	-1.11127	0.354237	-3.13707	0.00170643	0.0611218
piR-55398	GXN_559477	piR-hsa-18519	207.166	-0.760039	0.242314	-3.13659	0.00170927	0.0611218
piR-31147	GXN_540734	piR-hsa-1286	14.8465	-1.19106	0.380473	-3.13047	0.00174527	0.0615941
piR-32685	GXN_553247	piR-hsa-12796	37.669	-1.16841	0.373347	-3.12956	0.00175071	0.0615941
piR-50414	GXN_554133	piR-hsa-13611	14.9814	-0.916965	0.294021	-3.11871	0.00181646	0.0627992
piR-51152	GXN_554860	piR-hsa-14276	123.164	-0.796425	0.255317	-3.11935	0.00181248	0.0627992
piR-38945	GXN_573297	piR-hsa-31165	29.5143	-0.781095	0.250382	-3.11961	0.00181091	0.0627992
piR-33398	GXN_564988	piR-hsa-23549	16.9616	-1.19354	0.383327	-3.11362	0.00184804	0.0635239
piR-51020	GXN_554715	piR-hsa-14145	25.394	-1.15	0.369692	-3.11069	0.00186651	0.063792
piR-58239	GXN_562651	piR-hsa-21406	35.0907	0.919412	0.295757	3.10867	0.0018793	0.0638641
piR-52605	GXN_556498	piR-hsa-15789	16.7224	0.864653	0.27847	3.10501	0.0019027	0.064294
piR-43216	GXN_545210	piR-hsa-5410	106.229	-1.02053	0.328955	-3.10235	0.00191993	0.064512
piR-34660	GXN_568553	piR-hsa-26810	21.1532	-1.10937	0.357949	-3.09925	0.0019401	0.0648253
piR-33136	GXN_564716	piR-hsa-23302	22.0167	-1.14402	0.369708	-3.09438	0.00197225	0.0655333
piR-44675	GXN_546732	piR-hsa-6811	88.5847	-1.08713	0.35176	-3.09056	0.00199782	0.0660165
piR-40271	GXN_541952	piR-hsa-2410	22.9621	1.06442	0.345112	3.08429	0.00204041	0.0670533
piR-30230	GXN_539805	piR-hsa-427	28.2418	-1.07214	0.348927	-3.07269	0.00212139	0.0690164
piR-30850	GXN_540431	piR-hsa-1003	22.2786	-1.06389	0.346408	-3.07119	0.00213205	0.0690164
piR-32654	GXN_553214	piR-hsa-12765	17.5883	-0.695444	0.226469	-3.07081	0.00213477	0.0690164
piR-34686	GXN_568582	piR-hsa-26836	60.8	-1.15545	0.376747	-3.0669	0.00216289	0.0695498
piR-42686	GXN_544563	piR-hsa-4807	109.35	-0.84547	0.276659	-3.056	0.00224313	0.0709127
piR-43020	GXN_545001	piR-hsa-5214	57.5692	-1.0491	0.343436	-3.05472	0.0022527	0.0709127
piR-33629	GXN_565224	piR-hsa-23765	17.6458	-1.18593	0.388215	-3.05482	0.00225198	0.0709127
piR-34076	GXN_567930	piR-hsa-26242	19.1626	-0.723544	0.236641	-3.05756	0.00223148	0.0709127
piR-41899	GXN_543755	piR-hsa-4066	112.902	-1.15876	0.379924	-3.04998	0.00228857	0.0716645
piR-42410	GXN_544293	piR-hsa-4560	147.441	-1.03537	0.339713	-3.04777	0.00230545	0.0718172
piR-59146	GXN_563609	piR-hsa-22282	35.8045	-1.1536	0.379452	-3.04017	0.00236446	0.0732737
piR-37066	GXN_571272	piR-hsa-29300	147.542	-0.787284	0.259771	-3.03068	0.00244001	0.0752254
piR-42370	GXN_544249	piR-hsa-4520	15.1811	-1.07066	0.353756	-3.02654	0.00247369	0.0758724
piR-40425	GXN_542118	piR-hsa-2564	93.0605	1.046	0.345914	3.02388	0.00249558	0.0761535
piR-55929	GXN_560140	piR-hsa-19114	437.71	-1.10647	0.366279	-3.02083	0.00252085	0.0763759
piR-35407	GXN_569437	piR-hsa-27616	248.427	-0.703698	0.233019	-3.01992	0.00252841	0.0763759
piR-42479	GXN_544337	piR-hsa-4600	21.7608	-0.633571	0.210372	-3.01167	0.00259816	0.0773771
piR-32377	GXN_552911	piR-hsa-12488	285.983	-0.872505	0.289445	-3.0144	0.00257487	0.0773771
piR-50204	GXN_553924	piR-hsa-13415	1433.28	-1.09136	0.362771	-3.0084	0.00262624	0.0773771
piR-55584	GXN_559777	piR-hsa-18785	28.3263	1.17199	0.389444	3.0094	0.00261763	0.0773771
piR-60390	GXN_566040	piR-hsa-24512	65.7712	-1.11135	0.369403	-3.00849	0.00262548	0.0773771
piR-42850	GXN_544848	piR-hsa-5073	36.0089	-0.854876	0.284459	-3.00527	0.00265349	0.0777968
piR-43032	GXN_545014	piR-hsa-5226	17.0509	-0.636161	0.212145	-2.99871	0.00271125	0.0791025
piR-47378	GXN_549738	piR-hsa-9564	26.5066	-0.57979	0.193561	-2.99538	0.00274104	0.0795832
piR-54653	GXN_558723	piR-hsa-17831	552.301	-0.949209	0.317533	-2.98932	0.00279597	0.080601
piR-58148	GXN_562552	piR-hsa-21315	58.1948	-0.70413	0.23583	-2.98575	0.00282882	0.080601
piR-35150	GXN_569171	piR-hsa-27374	601.603	-0.870873	0.291689	-2.98562	0.00283	0.080601
piR-37874	GXN_572063	piR-hsa-30036	19.5384	-0.929149	0.310991	-2.9877	0.00281082	0.080601
piR-45016	GXN_547186	piR-hsa-7225	13.4799	1.13405	0.380234	2.98251	0.00285894	0.0810394
piR-42977	GXN_544625	piR-hsa-4865	215.852	-1.10291	0.37129	-2.97047	0.00297345	0.0823342
piR-55576	GXN_559768	piR-hsa-18777	82.881	0.784826	0.264095	2.97176	0.00296101	0.0823342
piR-55721	GXN_559928	piR-hsa-18920	21.7788	-0.796561	0.267762	-2.97488	0.00293099	0.0823342
piR-38427	GXN_572628	piR-hsa-30561	40.6344	0.832939	0.280232	2.97231	0.00295564	0.0823342
piR-39270	GXN_573635	piR-hsa-31474	88.1457	-0.755274	0.253953	-2.97407	0.00293881	0.0823342
piR-42368	GXN_544247	piR-hsa-4518	32.3702	-1.08411	0.365554	-2.96566	0.00302036	0.0827728
piR-42929	GXN_544933	piR-hsa-5152	62.4188	-0.974188	0.328607	-2.9646	0.0030308	0.0827728
piR-60219	GXN_565852	piR-hsa-24341	20.9506	-1.08696	0.366614	-2.96486	0.00302824	0.0827728
piR-46724	GXN_546890	piR-hsa-6955	27.1834	-1.06853	0.361208	-2.95823	0.00309412	0.0841177
piR-30948	GXN_540522	piR-hsa-1087	13.8551	-0.748523	0.254019	-2.94672	0.00321164	0.0858416
piR-44719	GXN_546764	piR-hsa-6840	133.386	-0.794668	0.269583	-2.94777	0.00320077	0.0858416
piR-56374	GXN_560614	piR-hsa-19544	17.1431	-0.866095	0.293605	-2.94986	0.00317917	0.0858416
piR-57702	GXN_561986	piR-hsa-20799	14.6312	1.1159	0.378734	2.9464	0.00321493	0.0858416
piR-30828	GXN_540407	piR-hsa-981	16.469	0.550166	0.187878	2.92831	0.0034081	0.0886255
piR-31559	GXN_541261	piR-hsa-1770	48.649	-0.447994	0.152668	-2.93444	0.00334151	0.0886255
piR-42888	GXN_544888	piR-hsa-5111	62.8791	-0.957868	0.3266	-2.93285	0.00335871	0.0886255
piR-51986	GXN_555231	piR-hsa-14616	189.646	-1.01856	0.347772	-2.92881	0.00340259	0.0886255
piR-35423	GXN_569454	piR-hsa-27632	48.4196	-0.602021	0.205335	-2.9319	0.00336893	0.0886255
piR-37832	GXN_572018	piR-hsa-29994	21.7609	1.1005	0.375757	2.92874	0.00340339	0.0886255
piR-43466	GXN_545463	piR-hsa-5646	73.0959	-0.61432	0.210085	-2.92415	0.00345398	0.0894297
piR-30091	GXN_539672	piR-hsa-303	1786.85	1.01348	0.346809	2.9223	0.00347459	0.0895755
piR-32911	GXN_553605	piR-hsa-13122	12.9195	1.13395	0.388948	2.91542	0.00355216	0.0907926
piR-60215	GXN_565848	piR-hsa-24337	135.881	-1.0726	0.367804	-2.91622	0.00354296	0.0907926
piR-34634	GXN_568524	piR-hsa-26784	22.6065	-0.773759	0.265927	-2.90966	0.00361821	0.0920873
piR-32687	GXN_553249	piR-hsa-12798	16.7209	-0.803769	0.276588	-2.90602	0.0036606	0.0927714
piR-32783	GXN_553466	piR-hsa-12994	115.536	-1.03575	0.356805	-2.90284	0.00369794	0.0933223
piR-48186	GXN_550554	piR-hsa-10314	27.4566	-0.681929	0.235269	-2.89851	0.00374942	0.0942237
piR-42351	GXN_544230	piR-hsa-4501	127.757	-1.11879	0.386521	-2.89451	0.00379751	0.0942445
piR-51274	GXN_554977	piR-hsa-14384	41.8004	-0.841964	0.29082	-2.89514	0.00378993	0.0942445
piR-34742	GXN_568627	piR-hsa-26878	27.4888	0.792625	0.273687	2.89609	0.00377838	0.0942445
piR-42367	GXN_544246	piR-hsa-4517	34.0064	-1.03325	0.358052	-2.88574	0.00390495	0.0953432
piR-42525	GXN_544388	piR-hsa-4646	28.7882	-0.885691	0.307385	-2.88137	0.0039595	0.0953432
piR-56342	GXN_560579	piR-hsa-19512	184.881	-0.754872	0.262055	-2.88059	0.00396931	0.0953432
piR-59258	GXN_563713	piR-hsa-22380	46.0195	0.840328	0.291397	2.88379	0.0039292	0.0953432
piR-33162	GXN_564745	piR-hsa-23328	84.4613	1.04615	0.362893	2.88281	0.00394146	0.0953432
piR-60569	GXN_566220	piR-hsa-24676	18.3492	-0.752934	0.261043	-2.88433	0.00392249	0.0953432
piR-36469	GXN_568975	piR-hsa-27195	111.854	0.945034	0.327243	2.88786	0.00387867	0.0953432
piR-36112	GXN_570140	piR-hsa-28261	44.6719	-1.02454	0.354675	-2.88867	0.0038688	0.0953432
piR-32222	GXN_552758	piR-hsa-12348	21.4923	-0.706198	0.245668	-2.8746	0.00404542	0.0967827
piR-43518	GXN_545504	piR-hsa-5684	226.105	-0.893745	0.311513	-2.86904	0.00411716	0.096987
piR-47015	GXN_549364	piR-hsa-9216	48.1636	-0.6618	0.230557	-2.87044	0.00409896	0.096987
piR-32545	GXN_553094	piR-hsa-12656	53.2893	1.03043	0.359092	2.86954	0.00411072	0.096987
piR-33937	GXN_565562	piR-hsa-24073	35.199	-0.573547	0.199918	-2.86891	0.00411883	0.096987
piR-61722	GXN_567507	piR-hsa-25857	279.255	-0.737164	0.257301	-2.86498	0.00417029	0.0978138
piR-47190	GXN_549550	piR-hsa-9390	22.0138	-1.07136	0.374755	-2.85884	0.00425196	0.0981891
piR-52851	GXN_556730	piR-hsa-16004	410.339	-1.0466	0.365958	-2.85988	0.00423807	0.0981891
piR-54464	GXN_558517	piR-hsa-17642	14.4713	1.10496	0.386259	2.86068	0.00422729	0.0981891
piR-56288	GXN_560519	piR-hsa-19458	24.4177	-0.805818	0.281661	-2.86095	0.00422371	0.0981891
piR-42363	GXN_544242	piR-hsa-4513	60.4369	-0.813867	0.285415	-2.85152	0.00435106	0.0997076
piR-37224	GXN_571079	piR-hsa-29125	31.1963	-0.702958	0.24646	-2.85222	0.00434147	0.0997076
piR-47545	GXN_549886	piR-hsa-9702	73.9266	0.876597	0.30761	2.8497	0.00437599	0.0998962
piR-41829	GXN_543678	piR-hsa-3996	34.483	-0.719628	0.252944	-2.84501	0.00444106	0.100996
piR-51609	GXN_555452	piR-hsa-14822	114.022	-0.95155	0.334823	-2.84195	0.00448389	0.101584
piR-48081	GXN_550439	piR-hsa-10209	249.282	-0.798995	0.28155	-2.83784	0.00454202	0.102513
piR-59874	GXN_564462	piR-hsa-23069	33.2862	-1.10396	0.389225	-2.83632	0.00456373	0.102615
piR-39697	GXN_574062	piR-hsa-31871	24.0662	-0.806741	0.284767	-2.83299	0.00461148	0.103301
piR-51371	GXN_555084	piR-hsa-14481	79.2318	-0.817929	0.289051	-2.8297	0.00465912	0.103978
piR-60466	GXN_566123	piR-hsa-24588	44.4605	-0.869235	0.30777	-2.8243	0.00473843	0.105355
piR-47376	GXN_549736	piR-hsa-9562	344.939	1.0614	0.376691	2.8177	0.00483695	0.107147
piR-42895	GXN_544896	piR-hsa-5118	29.9529	0.725287	0.25758	2.81578	0.00486593	0.107392
piR-32434	GXN_552973	piR-hsa-12545	13.6536	-0.929019	0.330383	-2.81194	0.00492434	0.108281
piR-43403	GXN_545396	piR-hsa-5583	15.4991	-0.771011	0.274938	-2.80431	0.00504249	0.110473
piR-43194	GXN_545187	piR-hsa-5388	67.1194	-1.04662	0.373559	-2.80175	0.00508262	0.11058
piR-48225	GXN_550597	piR-hsa-10353	175.438	-0.997718	0.356119	-2.80164	0.00508434	0.11058
piR-43767	GXN_545777	piR-hsa-5933	32.8349	0.916572	0.327854	2.79567	0.00517923	0.11174
piR-32138	GXN_552668	piR-hsa-12265	101.356	-0.760122	0.271762	-2.79701	0.0051578	0.11174
piR-54736	GXN_557437	piR-hsa-16652	33.9516	-0.640273	0.229097	-2.79476	0.00519375	0.11174
piR-31132	GXN_540718	piR-hsa-1271	31.886	1.08678	0.389397	2.79093	0.00525567	0.112667
piR-46495	GXN_548725	piR-hsa-8624	23.7817	-0.538715	0.193515	-2.78384	0.00537191	0.114339
piR-54900	GXN_558977	piR-hsa-18064	42.2108	-0.940163	0.337662	-2.78433	0.00536384	0.114339
piR-31613	GXN_541320	piR-hsa-1824	2098.86	0.836426	0.300664	2.78193	0.00540369	0.114608
piR-58049	GXN_562443	piR-hsa-21216	15.2202	1.0205	0.367045	2.7803	0.00543081	0.114776
piR-41317	GXN_543138	piR-hsa-3498	31.3808	0.867085	0.312024	2.77891	0.00545424	0.114866
piR-60202	GXN_565835	piR-hsa-24324	18.1318	-1.08302	0.389915	-2.77758	0.00547646	0.114929
piR-33420	GXN_565012	piR-hsa-23571	71.0588	0.82873	0.299116	2.7706	0.0055953	0.11663
piR-37613	GXN_571813	piR-hsa-29804	30.9965	-0.843849	0.304581	-2.77053	0.00559653	0.11663
piR-32021	GXN_541714	piR-hsa-2189	38.5947	-0.68099	0.245909	-2.76928	0.00561804	0.116672
piR-40380	GXN_542070	piR-hsa-2519	2282.19	-1.05947	0.383338	-2.7638	0.00571329	0.118239
piR-42853	GXN_544852	piR-hsa-5076	15.1985	-0.611432	0.221343	-2.76237	0.00573833	0.118348
piR-37198	GXN_571413	piR-hsa-29432	58.3344	-0.709479	0.256982	-2.76081	0.00576587	0.118507
piR-42824	GXN_544821	piR-hsa-5047	302.077	-0.740998	0.268746	-2.75724	0.00582907	0.119315
piR-43361	GXN_545351	piR-hsa-5541	36.1155	-0.50886	0.184646	-2.75586	0.00585372	0.119315
piR-44647	GXN_546701	piR-hsa-6783	707.829	-0.805805	0.292577	-2.75417	0.00588421	0.119315
piR-53542	GXN_557547	piR-hsa-16750	20.5173	-0.726936	0.263944	-2.75412	0.00588494	0.119315
piR-42303	GXN_544177	piR-hsa-4453	42.9849	-0.682142	0.248034	-2.7502	0.00595593	0.119941
piR-42434	GXN_544320	piR-hsa-4584	40.141	-0.971965	0.353364	-2.75061	0.00594852	0.119941
piR-45410	GXN_547584	piR-hsa-7588	191.631	0.933491	0.339834	2.7469	0.00601616	0.120566
piR-32049	GXN_552574	piR-hsa-12176	18.1085	0.817013	0.297548	2.74582	0.006036	0.120566
piR-58616	GXN_563048	piR-hsa-21768	126.566	-0.823976	0.300152	-2.7452	0.00604743	0.120566
piR-57917	GXN_562316	piR-hsa-21101	38.8787	0.957117	0.34896	2.74277	0.00609227	0.120655
piR-60142	GXN_565769	piR-hsa-24264	876.129	-0.701384	0.25569	-2.74311	0.00608605	0.120655
piR-44643	GXN_546697	piR-hsa-6779	26.7124	1.04352	0.380766	2.74059	0.00613297	0.120662
piR-44981	GXN_547148	piR-hsa-7190	8212.36	1.06061	0.386848	2.74167	0.00611281	0.120662
piR-54034	GXN_558065	piR-hsa-17228	20.2818	-0.932213	0.340455	-2.73814	0.00617876	0.121164
piR-49619	GXN_552157	piR-hsa-11791	22.92	-0.953687	0.349047	-2.73226	0.00629018	0.122946
piR-30268	GXN_539847	piR-hsa-465	178.506	-0.890996	0.326542	-2.72858	0.00636073	0.123804
piR-43404	GXN_545397	piR-hsa-5584	20.4326	-0.660308	0.242064	-2.72782	0.00637544	0.123804
piR-58537	GXN_562961	piR-hsa-21689	116.841	-0.702729	0.257878	-2.72504	0.00642931	0.124446
piR-42422	GXN_544307	piR-hsa-4572	37.3092	-0.952405	0.350828	-2.71473	0.00663289	0.127972
piR-32046	GXN_552571	piR-hsa-12173	2997.71	-0.757847	0.279563	-2.71083	0.0067115	0.129072
piR-30576	GXN_540147	piR-hsa-744	25.6269	-0.755448	0.280003	-2.698	0.0069757	0.133153
piR-44583	GXN_546632	piR-hsa-6719	41.2394	0.953391	0.353462	2.6973	0.00699045	0.133153
piR-56814	GXN_561082	piR-hsa-19970	44.1157	-0.602551	0.223249	-2.69901	0.00695463	0.133153
piR-32537	GXN_553085	piR-hsa-12648	13277.6	-1.01579	0.377451	-2.6912	0.00711965	0.133744
piR-53866	GXN_557883	piR-hsa-17060	17.8337	0.983755	0.365461	2.69182	0.00710635	0.133744
piR-35917	GXN_569945	piR-hsa-28081	1428.63	-1.02335	0.379836	-2.69418	0.00705614	0.133744
piR-37884	GXN_572074	piR-hsa-30046	53.1098	-0.462342	0.171839	-2.69056	0.00713329	0.133744
piR-39213	GXN_572954	piR-hsa-30867	12.7487	-0.57835	0.214715	-2.69357	0.0070692	0.133744
piR-30338	GXN_539919	piR-hsa-535	160.755	-0.860013	0.319812	-2.68912	0.00716414	0.133902
piR-42775	GXN_544768	piR-hsa-4998	54.4289	-0.575073	0.214353	-2.68284	0.0073001	0.135596
piR-52824	GXN_556701	piR-hsa-15977	29.8232	0.972664	0.362423	2.68378	0.00727942	0.135596
piR-40668	GXN_542367	piR-hsa-2792	19.8825	0.907564	0.339043	2.67684	0.00743198	0.135935
piR-42416	GXN_544300	piR-hsa-4566	89.6992	-0.924914	0.345162	-2.67966	0.0073698	0.135935
piR-52279	GXN_556165	piR-hsa-15478	33.5854	-0.627321	0.234092	-2.67981	0.00736642	0.135935
piR-55962	GXN_560177	piR-hsa-19147	17.8404	0.868762	0.32447	2.67748	0.00741784	0.135935
piR-35429	GXN_569461	piR-hsa-27638	14.1435	0.772883	0.288613	2.67792	0.00740808	0.135935
piR-48738	GXN_551145	piR-hsa-10852	69.2998	1.04353	0.39	2.67572	0.00745685	0.135974
piR-31717	GXN_541398	piR-hsa-1899	16.5065	0.948999	0.35532	2.67083	0.00756639	0.137552
piR-30966	GXN_540541	piR-hsa-1105	18.0968	-0.945597	0.354367	-2.66841	0.00762116	0.13771
piR-59034	GXN_563486	piR-hsa-22170	18.4956	-0.826442	0.309709	-2.66845	0.00762029	0.13771
piR-52705	GXN_556606	piR-hsa-15888	35.5573	0.711393	0.2669	2.66539	0.00768989	0.138534
piR-42545	GXN_544410	piR-hsa-4666	23.9451	-0.720078	0.270962	-2.65748	0.0078727	0.139723
piR-42809	GXN_544804	piR-hsa-5032	236.874	-0.98623	0.371032	-2.65808	0.00785883	0.139723
piR-43785	GXN_545797	piR-hsa-5951	146.078	-0.898774	0.337974	-2.6593	0.00783037	0.139723
piR-58664	GXN_563101	piR-hsa-21816	17.1363	-0.719902	0.270894	-2.6575	0.00787223	0.139723
piR-60588	GXN_566240	piR-hsa-24695	13.7625	0.632446	0.237769	2.65992	0.00781588	0.139723
piR-44241	GXN_546280	piR-hsa-6392	503.1	0.957631	0.360596	2.65569	0.00791468	0.140052
piR-45302	GXN_547466	piR-hsa-7480	178.175	1.02623	0.386749	2.65349	0.00796641	0.140534
piR-36041	GXN_570063	piR-hsa-28190	33068.5	0.692767	0.261171	2.65254	0.00798888	0.140534
piR-45411	GXN_547586	piR-hsa-7589	18.8796	-0.95012	0.358411	-2.65092	0.00802728	0.140795
piR-43080	GXN_545064	piR-hsa-5274	266.366	-0.683418	0.258369	-2.64513	0.00816605	0.14281
piR-42121	GXN_543996	piR-hsa-4286	20.5487	-0.566708	0.214333	-2.64405	0.00819196	0.142846
piR-48006	GXN_550357	piR-hsa-10134	60.6353	-1.02953	0.390043	-2.63954	0.00830191	0.144342
piR-41909	GXN_543766	piR-hsa-4076	19.8986	-0.797998	0.302922	-2.63434	0.00843022	0.145459
piR-43258	GXN_545238	piR-hsa-5438	26.4281	0.634723	0.241154	2.63203	0.00848776	0.145459
piR-32145	GXN_552676	piR-hsa-12272	16.9057	-0.617173	0.234147	-2.63583	0.00839312	0.145459
piR-56218	GXN_560442	piR-hsa-19388	35.6108	-0.540921	0.205487	-2.63238	0.00847878	0.145459
piR-36664	GXN_570725	piR-hsa-28798	208.929	0.794482	0.301692	2.63342	0.00845289	0.145459
piR-46922	GXN_549169	piR-hsa-9037	13.9864	-0.611066	0.23236	-2.62982	0.00854305	0.145573
piR-52303	GXN_556190	piR-hsa-15502	15.5035	-0.922086	0.350606	-2.62998	0.00853899	0.145573
piR-30584	GXN_540156	piR-hsa-752	21.8519	-0.765975	0.29179	-2.62509	0.0086625	0.146772
piR-56053	GXN_560261	piR-hsa-19223	12.7634	0.857151	0.326427	2.62586	0.00864297	0.146772
piR-31905	GXN_541602	piR-hsa-2087	666.462	-0.701234	0.267426	-2.62216	0.00873738	0.14697
piR-33465	GXN_565061	piR-hsa-23616	65.8141	0.882691	0.336635	2.6221	0.00873903	0.14697
piR-38018	GXN_572203	piR-hsa-30166	13.3295	0.873929	0.333338	2.62175	0.0087479	0.14697
piR-31561	GXN_541264	piR-hsa-1772	35.2334	0.934339	0.358177	2.60859	0.00909156	0.149458
piR-43959	GXN_545986	piR-hsa-6125	27367.6	0.837685	0.320517	2.61354	0.00896095	0.149458
piR-51156	GXN_554864	piR-hsa-14280	129.306	-1.01766	0.390053	-2.60904	0.00907972	0.149458
piR-58169	GXN_562575	piR-hsa-21336	36.4697	-0.876848	0.335876	-2.61063	0.00903745	0.149458
piR-33955	GXN_565582	piR-hsa-24091	25.8144	0.56411	0.216264	2.60843	0.00909594	0.149458
piR-60696	GXN_566358	piR-hsa-24803	92.4786	-0.705116	0.270099	-2.61058	0.00903888	0.149458
piR-34717	GXN_568600	piR-hsa-26853	83.919	-0.93742	0.359274	-2.60921	0.00907521	0.149458
piR-39767	GXN_574123	piR-hsa-31925	19.1269	-0.663081	0.254159	-2.60892	0.00908288	0.149458
piR-43001	GXN_544981	piR-hsa-5195	44.1926	-0.759952	0.291566	-2.60645	0.0091486	0.149912
piR-55328	GXN_559400	piR-hsa-18449	49.4365	-0.987854	0.380163	-2.5985	0.00936313	0.153008
piR-42862	GXN_544861	piR-hsa-5085	37.2858	-0.802988	0.309642	-2.59328	0.0095065	0.153257
piR-43148	GXN_545137	piR-hsa-5342	26.6377	-0.557699	0.214771	-2.59671	0.00941204	0.153257
piR-60960	GXN_566739	piR-hsa-25154	33.0225	-1.01048	0.389577	-2.59379	0.00949239	0.153257
piR-36376	GXN_570427	piR-hsa-28525	549.098	0.79296	0.30575	2.59349	0.0095006	0.153257
piR-38537	GXN_572745	piR-hsa-30671	30.018	-0.729027	0.280978	-2.59461	0.00946995	0.153257
piR-47321	GXN_549678	piR-hsa-9507	61.5874	-0.786913	0.303561	-2.59227	0.00953436	0.153293
piR-42235	GXN_544102	piR-hsa-4385	21.0951	0.72467	0.280261	2.58569	0.00971835	0.155416
piR-32738	GXN_553304	piR-hsa-12849	126.268	0.718945	0.277999	2.58614	0.00970577	0.155416
piR-42729	GXN_544718	piR-hsa-4952	46.0714	-0.836626	0.323827	-2.58356	0.00977866	0.155963
piR-31416	GXN_541120	piR-hsa-1641	29.672	-0.573159	0.222318	-2.5781	0.00993448	0.156212
piR-40440	GXN_542134	piR-hsa-2579	21.4599	0.574279	0.222588	2.58001	0.00987977	0.156212
piR-40981	GXN_542786	piR-hsa-3177	122.3	0.730516	0.283595	2.57592	0.00999745	0.156212
piR-41947	GXN_543806	piR-hsa-4112	107.111	0.623502	0.242012	2.57633	0.00998549	0.156212
piR-58165	GXN_562571	piR-hsa-21332	80.0598	0.928064	0.35975	2.57974	0.00988735	0.156212
piR-60503	GXN_564319	piR-hsa-22938	1149.59	-0.867203	0.336684	-2.57572	0.0100032	0.156212
piR-36892	GXN_570972	piR-hsa-29026	70.8983	0.700706	0.271815	2.57788	0.00994086	0.156212
piR-37618	GXN_571819	piR-hsa-29809	87.1449	-0.662738	0.256894	-2.57981	0.00988536	0.156212
piR-38354	GXN_572550	piR-hsa-30488	163.698	0.737852	0.286789	2.57281	0.0100877	0.157122
piR-39909	GXN_574277	piR-hsa-32067	16.6518	-0.6229	0.24242	-2.5695	0.0101844	0.158215
piR-36774	GXN_570842	piR-hsa-28908	17.0128	-0.600346	0.233789	-2.5679	0.0102317	0.158539
piR-33335	GXN_564919	piR-hsa-23486	40.8433	-0.635435	0.247571	-2.56668	0.0102678	0.158582
piR-34628	GXN_568518	piR-hsa-26778	13.9694	-0.644964	0.251349	-2.56601	0.0102875	0.158582
piR-51583	GXN_555425	piR-hsa-14796	28.6554	0.877957	0.342792	2.56119	0.0104314	0.160386
piR-31612	GXN_541319	piR-hsa-1823	964.419	-0.661806	0.259519	-2.55012	0.0107684	0.162463
piR-31642	GXN_541351	piR-hsa-1853	15.4508	0.659354	0.258382	2.55185	0.0107151	0.162463
piR-31662	GXN_541372	piR-hsa-1873	134.189	-0.799843	0.31404	-2.54695	0.010867	0.162463
piR-42708	GXN_544586	piR-hsa-4829	120.258	-0.597062	0.234578	-2.54526	0.0109196	0.162463
piR-43998	GXN_546013	piR-hsa-6149	24.8511	-0.958266	0.37572	-2.55048	0.0107576	0.162463
piR-46928	GXN_549175	piR-hsa-9043	50.2427	-0.760465	0.29763	-2.55507	0.0106167	0.162463
piR-50717	GXN_554430	piR-hsa-13885	26.2114	-0.528883	0.207333	-2.55088	0.010745	0.162463
piR-52811	GXN_556688	piR-hsa-15964	27.8316	-0.809798	0.317314	-2.55204	0.0107094	0.162463
piR-54148	GXN_558190	piR-hsa-17342	45.1194	-0.959051	0.376755	-2.54556	0.0109104	0.162463
piR-56617	GXN_560865	piR-hsa-19773	83.1492	0.44914	0.176266	2.54808	0.0108317	0.162463
piR-58326	GXN_562731	piR-hsa-21479	83.3747	-0.631731	0.248164	-2.54561	0.0109086	0.162463
piR-33203	GXN_564790	piR-hsa-23369	41.7074	-0.915088	0.358256	-2.55428	0.0106406	0.162463
piR-34832	GXN_568726	piR-hsa-26968	69.1017	0.818194	0.321118	2.54795	0.0108357	0.162463
piR-46297	GXN_548508	piR-hsa-8429	109.056	-0.756892	0.298173	-2.53843	0.011135	0.165256
piR-42260	GXN_544129	piR-hsa-4410	86.2554	-0.676068	0.266877	-2.53325	0.0113009	0.165258
piR-42261	GXN_544131	piR-hsa-4411	76.2712	-0.926128	0.3652	-2.53595	0.0112143	0.165258
piR-46548	GXN_548781	piR-hsa-8677	18.0054	-0.741168	0.292484	-2.53405	0.0112754	0.165258
piR-32676	GXN_553238	piR-hsa-12787	125.54	-0.616605	0.243244	-2.53493	0.0112471	0.165258
piR-33737	GXN_565342	piR-hsa-23873	51.7927	-0.532629	0.210069	-2.5355	0.0112288	0.165258
piR-37019	GXN_571221	piR-hsa-29253	15.6328	-0.71837	0.283326	-2.53549	0.0112291	0.165258
piR-43593	GXN_545587	piR-hsa-5759	3467.87	-0.930045	0.367399	-2.53143	0.0113598	0.165311
piR-58053	GXN_562448	piR-hsa-21220	28.5086	0.965135	0.381222	2.53169	0.0113516	0.165311
piR-48370	GXN_550756	piR-hsa-10498	21.9953	0.472936	0.187072	2.52809	0.0114685	0.166085
piR-34781	GXN_568670	piR-hsa-26917	30.9011	0.690415	0.273061	2.52843	0.0114575	0.166085
piR-53795	GXN_557807	piR-hsa-16989	29.6566	-0.417436	0.165249	-2.5261	0.0115337	0.166626
piR-46166	GXN_548381	piR-hsa-8313	21.6421	0.965214	0.38226	2.52502	0.0115693	0.166737
piR-42257	GXN_544126	piR-hsa-4407	86.3748	-0.670694	0.265768	-2.5236	0.0116159	0.167007
piR-40432	GXN_542126	piR-hsa-2571	18.5122	0.496653	0.196886	2.52254	0.0116509	0.167109
piR-55023	GXN_559081	piR-hsa-18158	13.8305	-0.793441	0.314708	-2.5212	0.0116957	0.167349
piR-40681	GXN_542381	piR-hsa-2805	201.501	-0.891947	0.353959	-2.51991	0.0117383	0.167559
piR-35525	GXN_569533	piR-hsa-27705	29.5706	-0.7375	0.29278	-2.51896	0.0117703	0.167615
piR-42258	GXN_544127	piR-hsa-4408	86.2865	-0.672098	0.267043	-2.51682	0.0118419	0.167734
piR-32133	GXN_552663	piR-hsa-12260	19.0258	-0.766686	0.304605	-2.51698	0.0118365	0.167734
piR-38968	GXN_573322	piR-hsa-31188	35.2926	-0.859324	0.341517	-2.5162	0.0118628	0.167734
piR-32825	GXN_553512	piR-hsa-13036	79.7638	0.571633	0.227784	2.50954	0.0120889	0.170528
piR-42381	GXN_544262	piR-hsa-4531	57.0152	-0.884942	0.352993	-2.50697	0.0121772	0.170659
piR-52607	GXN_556500	piR-hsa-15791	13.1376	-0.977916	0.390109	-2.50678	0.0121838	0.170659
piR-35551	GXN_569561	piR-hsa-27731	107.414	0.496744	0.198103	2.5075	0.0121588	0.170659
piR-53156	GXN_557045	piR-hsa-16294	59.1744	-0.566242	0.226055	-2.50489	0.0122489	0.17117
piR-60948	GXN_566726	piR-hsa-25142	58.3884	-0.612534	0.244965	-2.5005	0.0124018	0.172902
piR-52958	GXN_556844	piR-hsa-16111	46.258	-0.663151	0.265338	-2.49927	0.0124451	0.173103
piR-44984	GXN_547151	piR-hsa-7193	207.563	0.624176	0.25015	2.49521	0.0125883	0.174284
piR-45081	GXN_547258	piR-hsa-7288	54.9718	0.772365	0.309533	2.49526	0.0125866	0.174284
piR-31115	GXN_540700	piR-hsa-1254	6264.43	0.75499	0.303339	2.48893	0.0128128	0.174896
piR-42676	GXN_544552	piR-hsa-4797	30.8788	-0.538289	0.216004	-2.49203	0.0127016	0.174896
piR-42825	GXN_544822	piR-hsa-5048	991.39	-0.933927	0.375334	-2.48825	0.0128372	0.174896
piR-47003	GXN_549351	piR-hsa-9204	1269.8	0.769245	0.308678	2.49207	0.0127002	0.174896
piR-50189	GXN_553907	piR-hsa-13400	45.7351	0.868323	0.34896	2.48832	0.0128348	0.174896
piR-51589	GXN_555431	piR-hsa-14802	129.014	-0.68925	0.276962	-2.4886	0.0128246	0.174896
piR-36557	GXN_570608	piR-hsa-28692	24.7767	-0.971202	0.390308	-2.48829	0.0128358	0.174896
piR-30487	GXN_540050	piR-hsa-655	21.7496	0.449243	0.180625	2.48716	0.0128767	0.175
piR-62022	GXN_567820	piR-hsa-26142	13.5547	0.619133	0.249034	2.48614	0.0129138	0.175
piR-35053	GXN_569065	piR-hsa-27277	59.6634	-0.779843	0.313742	-2.48562	0.0129326	0.175
piR-49559	GXN_552092	piR-hsa-11732	21.9368	-0.853233	0.34385	-2.48141	0.0130863	0.176325
piR-57662	GXN_561942	piR-hsa-20759	19.1044	-0.907808	0.365933	-2.4808	0.0131087	0.176325
piR-35257	GXN_569273	piR-hsa-27466	12224.4	-0.668394	0.269457	-2.48052	0.013119	0.176325
piR-30555	GXN_540124	piR-hsa-723	29.992	-0.626127	0.25255	-2.47922	0.013167	0.176564
piR-30826	GXN_540405	piR-hsa-979	253.701	-0.893779	0.360621	-2.47844	0.0131958	0.176564
piR-57988	GXN_562393	piR-hsa-21170	175.355	-0.705288	0.284766	-2.47673	0.0132592	0.176622
piR-60683	GXN_566344	piR-hsa-24790	124.715	0.602127	0.243112	2.47674	0.0132587	0.176622
piR-38481	GXN_572685	piR-hsa-30615	1171.19	0.82556	0.333473	2.47564	0.0132997	0.176767
piR-39172	GXN_573543	piR-hsa-31391	16.6636	-0.852497	0.345244	-2.46926	0.0135393	0.179553
piR-30706	GXN_540274	piR-hsa-859	20.6851	-0.617726	0.250586	-2.46512	0.0136966	0.179691
piR-31623	GXN_541331	piR-hsa-1834	1543.36	-0.616177	0.249892	-2.46577	0.0136719	0.179691
piR-48977	GXN_551405	piR-hsa-11091	15.4491	-0.576179	0.233815	-2.46425	0.0137299	0.179691
piR-32325	GXN_552855	piR-hsa-12436	13.1436	0.636444	0.258034	2.46651	0.0136438	0.179691
piR-61135	GXN_566915	piR-hsa-25313	74.5618	0.849455	0.344681	2.46447	0.0137217	0.179691
piR-38321	GXN_572514	piR-hsa-30455	15.4279	-0.785487	0.318505	-2.46617	0.0136567	0.179691
piR-41891	GXN_543747	piR-hsa-4058	50.7182	-0.6278	0.255328	-2.4588	0.0139403	0.182005
piR-52682	GXN_556582	piR-hsa-15865	19.4442	0.951074	0.386915	2.4581	0.0139676	0.182005
piR-42518	GXN_544380	piR-hsa-4639	61.3484	0.665441	0.2709	2.45641	0.0140334	0.182465
piR-50482	GXN_553339	piR-hsa-12880	18.9379	0.57222	0.23304	2.45545	0.0140707	0.182553
piR-31531	GXN_541231	piR-hsa-1742	844.33	-0.702682	0.286617	-2.45164	0.0142206	0.183566
piR-41826	GXN_543675	piR-hsa-3993	53.4665	-0.560384	0.22862	-2.45116	0.0142398	0.183566
piR-50208	GXN_553928	piR-hsa-13419	15.7493	0.567514	0.231532	2.45113	0.0142408	0.183566
piR-43219	GXN_545213	piR-hsa-5413	106.114	-0.851916	0.34807	-2.44754	0.0143835	0.185006
piR-41027	GXN_542836	piR-hsa-3223	15.0303	-0.583295	0.238587	-2.44479	0.0144935	0.186021
piR-50709	GXN_554421	piR-hsa-13877	30.5545	-0.485026	0.198534	-2.44304	0.0145642	0.186528
piR-30840	GXN_540420	piR-hsa-993	578.243	-0.572465	0.234793	-2.43817	0.0147619	0.187057
piR-44312	GXN_546358	piR-hsa-6463	264.298	-0.64323	0.263708	-2.43918	0.0147208	0.187057
piR-53299	GXN_557169	piR-hsa-16408	26.3558	-0.57502	0.235748	-2.43913	0.0147227	0.187057
piR-57678	GXN_561959	piR-hsa-20775	26.2211	0.460729	0.188751	2.44094	0.0146492	0.187057
piR-34879	GXN_568778	piR-hsa-27015	18.3545	-0.902267	0.369962	-2.43881	0.0147358	0.187057
piR-51494	GXN_555218	piR-hsa-14604	22.1516	0.586646	0.241333	2.43086	0.0150631	0.189269
piR-57705	GXN_561989	piR-hsa-20802	206.303	0.925179	0.380555	2.43113	0.0150517	0.189269
piR-59429	GXN_563901	piR-hsa-22551	117.406	-0.620611	0.255226	-2.43161	0.0150318	0.189269
piR-35702	GXN_569724	piR-hsa-27881	15.6993	-0.54814	0.225398	-2.43187	0.0150209	0.189269
piR-37663	GXN_571867	piR-hsa-29854	34.5365	0.902471	0.371506	2.42923	0.0151311	0.189726
piR-48363	GXN_550749	piR-hsa-10491	42.9857	-0.678634	0.279497	-2.42805	0.0151802	0.189943
piR-37721	GXN_571114	piR-hsa-29156	38.1725	-0.797411	0.328819	-2.42508	0.0153052	0.191107
piR-40655	GXN_542353	piR-hsa-2779	28.8557	-0.407909	0.168334	-2.42322	0.0153835	0.191685
piR-53372	GXN_557250	piR-hsa-16481	60.5809	0.57058	0.235878	2.41896	0.0155649	0.193503
piR-58790	GXN_563222	piR-hsa-21927	21.464	0.726008	0.300217	2.41828	0.0155941	0.193503
piR-44915	GXN_547092	piR-hsa-7139	31.8115	-0.640443	0.265031	-2.41648	0.0156714	0.19406
piR-33880	GXN_565499	piR-hsa-24016	630.596	0.626843	0.25995	2.4114	0.0158914	0.196377
piR-45080	GXN_547256	piR-hsa-7287	27.7427	0.547922	0.227462	2.40885	0.0160029	0.197347
piR-30418	GXN_540007	piR-hsa-615	28.5062	0.746753	0.31017	2.40756	0.0160597	0.19764
piR-47951	GXN_550314	piR-hsa-10094	25.7639	-0.771488	0.320751	-2.40526	0.0161612	0.19848
piR-36591	GXN_570645	piR-hsa-28726	152.076	0.809078	0.336574	2.40386	0.0162229	0.19883
piR-42844	GXN_544842	piR-hsa-5067	628.837	0.749558	0.313099	2.394	0.0166659	0.201541
piR-42845	GXN_544843	piR-hsa-5068	19.4156	-0.584332	0.244353	-2.39135	0.0167868	0.201541
piR-43446	GXN_545442	piR-hsa-5626	50.568	-0.92164	0.385081	-2.39336	0.0166947	0.201541
piR-43687	GXN_545689	piR-hsa-5853	47.8343	-0.766263	0.319638	-2.39729	0.016517	0.201541
piR-49352	GXN_551884	piR-hsa-11540	21.3939	0.915728	0.382409	2.39463	0.0166371	0.201541
piR-50076	GXN_553784	piR-hsa-13287	59.3902	-0.608015	0.254232	-2.39157	0.0167764	0.201541
piR-57317	GXN_561582	piR-hsa-20429	13.1718	-0.568616	0.237285	-2.39634	0.0165598	0.201541
piR-61052	GXN_566825	piR-hsa-25231	54.8975	-0.649587	0.271185	-2.39536	0.0166041	0.201541
piR-34796	GXN_568687	piR-hsa-26932	14.6357	0.576294	0.240942	2.39184	0.0167643	0.201541
piR-36233	GXN_570271	piR-hsa-28382	7157.33	0.871561	0.364231	2.39288	0.0167167	0.201541
piR-38773	GXN_573108	piR-hsa-30993	18.8742	-0.593843	0.248394	-2.39073	0.0168147	0.201541
piR-60383	GXN_566033	piR-hsa-24505	20.7687	-0.504467	0.211172	-2.3889	0.0168991	0.202147
piR-40994	GXN_542800	piR-hsa-3190	24.7167	0.442354	0.185321	2.38696	0.0169881	0.202264
piR-57915	GXN_562314	piR-hsa-21099	52.5338	0.771231	0.323178	2.3864	0.0170145	0.202264
piR-58054	GXN_562449	piR-hsa-21221	24.7236	-0.856328	0.358858	-2.38626	0.0170209	0.202264
piR-58562	GXN_562989	piR-hsa-21714	521.989	0.817473	0.342648	2.38575	0.0170441	0.202264
piR-41540	GXN_543378	piR-hsa-3721	16.0274	-0.577542	0.242305	-2.38353	0.0171475	0.202746
piR-38497	GXN_572703	piR-hsa-30631	53.8484	0.521508	0.218806	2.38342	0.0171525	0.202746
piR-42305	GXN_544179	piR-hsa-4455	19.506	0.883988	0.371479	2.37964	0.0173294	0.203012
piR-51401	GXN_555117	piR-hsa-14511	72.3684	0.919715	0.3864	2.38022	0.0173025	0.203012
piR-52567	GXN_556459	piR-hsa-15751	20.8004	-0.921641	0.387255	-2.37993	0.0173158	0.203012
piR-53083	GXN_556965	piR-hsa-16221	13.9039	0.65887	0.276916	2.37932	0.0173447	0.203012
piR-60435	GXN_566089	piR-hsa-24557	20.9746	-0.682632	0.286584	-2.38196	0.0172207	0.203012
piR-60750	GXN_564334	piR-hsa-22952	18.9953	0.506485	0.213294	2.37459	0.0175685	0.205228
piR-49035	GXN_551578	piR-hsa-11252	12.7328	-0.627849	0.264721	-2.37174	0.0177047	0.205615
piR-53826	GXN_557839	piR-hsa-17020	17.3575	0.573211	0.241543	2.37312	0.0176384	0.205615
piR-33050	GXN_564622	piR-hsa-23216	124.872	0.875918	0.36924	2.37222	0.0176817	0.205615
piR-44720	GXN_546765	piR-hsa-6841	53.1783	-0.693423	0.292778	-2.36843	0.017864	0.207063
piR-43089	GXN_545074	piR-hsa-5283	34.6152	-0.74341	0.314088	-2.36689	0.0179384	0.207523
piR-36780	GXN_570849	piR-hsa-28914	185.724	-0.692448	0.292723	-2.36554	0.0180039	0.207879
piR-31256	GXN_540947	piR-hsa-1481	25.4299	-0.50864	0.215167	-2.36393	0.0180822	0.208351
piR-54857	GXN_558930	piR-hsa-18021	21.4457	-0.865449	0.366208	-2.36327	0.0181144	0.208351
piR-52412	GXN_556308	piR-hsa-15611	52.3102	-0.627361	0.265778	-2.36047	0.0182517	0.209526
piR-34533	GXN_568413	piR-hsa-26683	375.522	0.592192	0.250985	2.35947	0.0183009	0.209689
piR-52035	GXN_555900	piR-hsa-15234	18.495	0.496906	0.210874	2.35641	0.0184524	0.210618
piR-35889	GXN_569914	piR-hsa-28053	26.7073	-0.547649	0.232373	-2.35677	0.0184347	0.210618
piR-30821	GXN_540400	piR-hsa-974	33.3876	-0.545342	0.231634	-2.35432	0.0185565	0.210902
piR-60060	GXN_565680	piR-hsa-24182	16.7084	-0.546228	0.232063	-2.35379	0.0185831	0.210902
piR-38234	GXN_571165	piR-hsa-29203	22.575	0.858418	0.364581	2.35453	0.018546	0.210902
piR-47193	GXN_549554	piR-hsa-9393	70.3192	-0.781508	0.332425	-2.35093	0.0187265	0.210929
piR-47950	GXN_550312	piR-hsa-10093	40.3234	-0.56063	0.238427	-2.35137	0.0187045	0.210929
piR-32205	GXN_552740	piR-hsa-12331	19.3397	-0.550258	0.234049	-2.35104	0.0187211	0.210929
piR-38736	GXN_573069	piR-hsa-30958	383.652	-0.471899	0.200603	-2.35241	0.0186522	0.210929
piR-47896	GXN_550254	piR-hsa-10039	44.865	-0.619193	0.263485	-2.35001	0.0187729	0.211053
piR-46822	GXN_549060	piR-hsa-8937	18.5613	0.906859	0.386109	2.34871	0.0188384	0.211393
piR-39314	GXN_573682	piR-hsa-31518	43.3561	-0.797241	0.339616	-2.34748	0.0189009	0.211697
piR-51191	GXN_554903	piR-hsa-14315	26.4275	-0.888779	0.378785	-2.34639	0.0189562	0.211919
piR-55166	GXN_559238	piR-hsa-18301	36.7759	-0.786442	0.33552	-2.34395	0.0190809	0.212916
piR-47926	GXN_550287	piR-hsa-10069	31.513	-0.526927	0.225094	-2.34092	0.0192363	0.21425
piR-36661	GXN_570722	piR-hsa-28795	12.7219	0.784236	0.335315	2.3388	0.0193456	0.215067
piR-42781	GXN_544774	piR-hsa-5004	47.8812	-0.661995	0.283319	-2.33657	0.0194614	0.215812
piR-32746	GXN_553425	piR-hsa-12957	47.8032	-0.739572	0.316581	-2.33612	0.0194848	0.215812
piR-61200	GXN_566985	piR-hsa-25378	179.956	-0.701634	0.300725	-2.33314	0.0196407	0.217136
piR-45034	GXN_547206	piR-hsa-7243	113.298	0.90464	0.388493	2.32859	0.0198808	0.219386
piR-54855	GXN_558928	piR-hsa-18019	21.5278	-0.846265	0.364611	-2.321	0.0202866	0.223209
piR-34529	GXN_568409	piR-hsa-26679	13.5258	-0.596377	0.256979	-2.32072	0.0203019	0.223209
piR-42382	GXN_544263	piR-hsa-4532	211.266	-0.810463	0.350336	-2.31339	0.0207013	0.226352
piR-42934	GXN_544939	piR-hsa-5157	43.89	-0.750909	0.324524	-2.31388	0.0206744	0.226352
piR-54821	GXN_558891	piR-hsa-17985	44.5352	-0.902613	0.390132	-2.31361	0.0206892	0.226352
piR-30926	GXN_540514	piR-hsa-1079	131.392	-0.508995	0.22023	-2.3112	0.0208219	0.226397
piR-42383	GXN_544264	piR-hsa-4533	209.943	-0.81313	0.351608	-2.3126	0.0207445	0.226397
piR-55216	GXN_559293	piR-hsa-18351	47.0542	0.721353	0.312232	2.31032	0.0208707	0.226397
piR-61013	GXN_566434	piR-hsa-24874	31.9098	0.767099	0.332095	2.30988	0.0208947	0.226397
piR-34844	GXN_568739	piR-hsa-26980	1069.59	-0.542055	0.234484	-2.31169	0.0207946	0.226397
piR-44507	GXN_546551	piR-hsa-6643	82.3468	-0.884873	0.383366	-2.30817	0.0209899	0.226644
piR-60302	GXN_565944	piR-hsa-24424	17.7079	0.581798	0.252068	2.30811	0.0209933	0.226644
piR-32550	GXN_553099	piR-hsa-12661	54.8065	-0.579789	0.251355	-2.30666	0.021074	0.227105
piR-40180	GXN_541885	piR-hsa-2348	135.225	0.407592	0.176778	2.30567	0.021129	0.227289
piR-47413	GXN_549776	piR-hsa-9599	16.0573	0.422185	0.183322	2.30297	0.0212808	0.228432
piR-32590	GXN_553143	piR-hsa-12701	54.9739	-0.747443	0.324634	-2.30242	0.0213117	0.228432
piR-56523	GXN_560762	piR-hsa-19679	13.4406	0.50588	0.219961	2.29986	0.0214563	0.229205
piR-33774	GXN_565383	piR-hsa-23910	20.0178	0.629789	0.273847	2.29979	0.0214604	0.229205
piR-32974	GXN_553672	piR-hsa-13185	18.0693	0.546729	0.237855	2.29858	0.0215289	0.229526
piR-37487	GXN_571677	piR-hsa-29678	15.3364	-0.741581	0.32282	-2.2972	0.0216075	0.229954
piR-42338	GXN_544215	piR-hsa-4488	204.759	0.676556	0.295445	2.28996	0.0220237	0.23314
piR-34479	GXN_568354	piR-hsa-26629	53.8974	0.778376	0.339724	2.2912	0.0219518	0.23314
piR-35632	GXN_569649	piR-hsa-27811	19.6147	-0.828678	0.36185	-2.29011	0.0220147	0.23314
piR-32887	GXN_553580	piR-hsa-13098	51.1333	-0.579704	0.25363	-2.28563	0.0222761	0.234565
piR-54790	GXN_558856	piR-hsa-17954	30.3367	-0.655924	0.286875	-2.28645	0.022228	0.234565
piR-35697	GXN_569719	piR-hsa-27876	279.32	-0.644339	0.281877	-2.28589	0.0222606	0.234565
piR-34950	GXN_568856	piR-hsa-27086	389.014	-0.877494	0.384366	-2.28296	0.0224326	0.235101
piR-35334	GXN_569357	piR-hsa-27543	13.3392	-0.669465	0.293175	-2.2835	0.0224009	0.235101
piR-36682	GXN_570745	piR-hsa-28816	319.014	0.603113	0.264204	2.28275	0.0224449	0.235101
piR-31547	GXN_541248	piR-hsa-1758	13.5451	0.462267	0.202608	2.28159	0.0225138	0.235352
piR-52189	GXN_556069	piR-hsa-15388	15.6605	-0.745275	0.326741	-2.28094	0.0225522	0.235352
piR-58607	GXN_563038	piR-hsa-21759	27.5236	-0.846054	0.371019	-2.28035	0.0225869	0.235352
piR-40851	GXN_542661	piR-hsa-3063	323.311	-0.748595	0.329367	-2.27283	0.0230364	0.236737
piR-41972	GXN_543833	piR-hsa-4137	27.03	0.793761	0.348888	2.27512	0.0228989	0.236737
piR-42098	GXN_543970	piR-hsa-4263	240.962	-0.723244	0.317684	-2.27661	0.0228094	0.236737
piR-46430	GXN_548654	piR-hsa-8559	1206.55	-0.597634	0.26265	-2.2754	0.0228822	0.236737
piR-57686	GXN_561968	piR-hsa-20783	16.6698	-0.602894	0.265057	-2.27458	0.0229312	0.236737
piR-59424	GXN_563896	piR-hsa-22546	12.8706	-0.542118	0.238191	-2.27598	0.0228472	0.236737
piR-34441	GXN_568313	piR-hsa-26591	75.0541	0.48321	0.212567	2.27322	0.0230132	0.236737
piR-39010	GXN_573368	piR-hsa-31230	65.2766	0.829082	0.364689	2.2734	0.0230023	0.236737
piR-55094	GXN_559159	piR-hsa-18229	22.5258	0.620894	0.273969	2.26629	0.0234335	0.238563
piR-57236	GXN_559659	piR-hsa-18679	1351.06	0.864744	0.381303	2.26787	0.0233373	0.238563
piR-55627	GXN_559824	piR-hsa-18827	48.6146	-0.720395	0.317823	-2.26666	0.0234111	0.238563
piR-56950	GXN_561231	piR-hsa-20106	18.7821	-0.872919	0.384942	-2.26766	0.0233498	0.238563
piR-33466	GXN_565062	piR-hsa-23617	4667.45	0.734681	0.324224	2.26597	0.0234535	0.238563
piR-61176	GXN_566960	piR-hsa-25354	12.791	0.668953	0.294806	2.26913	0.0232604	0.238563
piR-40765	GXN_542566	piR-hsa-2977	12.8658	-0.652644	0.2882	-2.26455	0.0235402	0.238634
piR-47969	GXN_550333	piR-hsa-10112	27.4955	-0.609856	0.269296	-2.26463	0.0235354	0.238634
piR-59290	GXN_563748	piR-hsa-22412	727.307	-0.790259	0.349212	-2.26298	0.0236372	0.239212
piR-44992	GXN_547160	piR-hsa-7201	1574.28	0.582712	0.257813	2.26021	0.0238079	0.239723
piR-46437	GXN_548662	piR-hsa-8566	49.7008	-0.683896	0.302427	-2.26136	0.0237369	0.239723
piR-51420	GXN_555136	piR-hsa-14530	28.6354	-0.605794	0.267949	-2.26085	0.0237685	0.239723
piR-42526	GXN_544389	piR-hsa-4647	78.725	-0.687088	0.304311	-2.25785	0.023955	0.240798
piR-41474	GXN_543309	piR-hsa-3655	89.1243	-0.629761	0.279305	-2.25474	0.0241494	0.24123
piR-43744	GXN_545752	piR-hsa-5910	53.6206	-0.601154	0.266746	-2.25366	0.0242175	0.24123
piR-47163	GXN_549521	piR-hsa-9363	25.5526	0.648373	0.287743	2.2533	0.02424	0.24123
piR-47995	GXN_550346	piR-hsa-10123	127.255	0.5812	0.257842	2.2541	0.0241901	0.24123
piR-37457	GXN_571660	piR-hsa-29662	41.7373	0.659976	0.292496	2.25636	0.0240482	0.24123
piR-37750	GXN_571931	piR-hsa-29912	43.8718	0.497499	0.220541	2.25581	0.0240826	0.24123
piR-46895	GXN_549140	piR-hsa-9010	8443.84	0.630092	0.279716	2.25261	0.0242835	0.241262
piR-30714	GXN_540283	piR-hsa-867	46.0947	-0.794181	0.353164	-2.24876	0.0245279	0.242081
piR-48428	GXN_550820	piR-hsa-10556	23.1954	0.468942	0.208445	2.24972	0.0244666	0.242081
piR-32475	GXN_553018	piR-hsa-12586	31.945	-0.463839	0.206209	-2.24936	0.0244897	0.242081
piR-59012	GXN_563462	piR-hsa-22148	72.2469	0.55291	0.245751	2.24988	0.0244569	0.242081
piR-32301	GXN_552829	piR-hsa-12413	107.709	-0.63911	0.284648	-2.24527	0.0247511	0.243481
piR-34328	GXN_568190	piR-hsa-26478	19.0683	-0.476764	0.212296	-2.24575	0.0247201	0.243481
piR-35920	GXN_569948	piR-hsa-28084	64.2266	-0.559368	0.249341	-2.24338	0.024872	0.244269
piR-56399	GXN_560641	piR-hsa-19569	31.393	-0.82786	0.370609	-2.23378	0.0254975	0.249592
piR-60415	GXN_566068	piR-hsa-24537	1356.63	-0.682156	0.305339	-2.2341	0.0254767	0.249592
piR-42182	GXN_544062	piR-hsa-4347	12.9086	-0.641762	0.28756	-2.23175	0.0256315	0.24988
piR-47763	GXN_550108	piR-hsa-9906	250.394	0.691009	0.30967	2.23144	0.0256523	0.24988
piR-34207	GXN_566501	piR-hsa-24935	140.688	-0.654077	0.292956	-2.23268	0.0255701	0.24988
piR-36245	GXN_570285	piR-hsa-28394	125.253	0.848559	0.380583	2.22963	0.025772	0.250638
piR-45453	GXN_547632	piR-hsa-7631	109.213	-0.61694	0.276908	-2.22796	0.0258831	0.250996
piR-46958	GXN_549207	piR-hsa-9073	26.067	-0.527213	0.23665	-2.22782	0.0258927	0.250996
piR-60691	GXN_566353	piR-hsa-24798	102.685	-0.76278	0.342589	-2.22651	0.0259797	0.251432
piR-48049	GXN_550403	piR-hsa-10177	13.8299	-0.540552	0.242995	-2.22454	0.0261119	0.251979
piR-34822	GXN_568715	piR-hsa-26958	174.295	0.522087	0.234708	2.22441	0.0261206	0.251979
piR-45937	GXN_548130	piR-hsa-8084	28.927	0.465203	0.209195	2.22378	0.0261633	0.251985
piR-45660	GXN_547843	piR-hsa-7822	32.7103	0.363924	0.163841	2.2212	0.0263378	0.252042
piR-60427	GXN_566080	piR-hsa-24549	15.2178	-0.665871	0.299758	-2.22136	0.0263264	0.252042
piR-37157	GXN_571370	piR-hsa-29391	215.954	0.554554	0.24959	2.22186	0.0262927	0.252042
piR-38436	GXN_572638	piR-hsa-30570	63.5345	0.530318	0.23863	2.22234	0.0262601	0.252042
piR-36075	GXN_570100	piR-hsa-28224	17.0365	0.760044	0.342354	2.22005	0.0264153	0.25238
piR-41875	GXN_543729	piR-hsa-4042	102.786	0.789936	0.356194	2.21772	0.0265742	0.252995
piR-42269	GXN_544139	piR-hsa-4419	23.5185	-0.563882	0.25453	-2.21539	0.0267334	0.252995
piR-42595	GXN_544464	piR-hsa-4716	29.0829	-0.615481	0.277539	-2.21763	0.0265797	0.252995
piR-43831	GXN_545848	piR-hsa-5997	98.1149	0.488636	0.220482	2.21622	0.0266764	0.252995
piR-35467	GXN_568913	piR-hsa-27138	456.623	0.6219	0.280686	2.21564	0.0267162	0.252995
piR-38576	GXN_572786	piR-hsa-30710	16.0542	-0.493597	0.222709	-2.21633	0.0266691	0.252995
piR-52411	GXN_556307	piR-hsa-15610	14.9013	-0.436488	0.197241	-2.21296	0.0269002	0.254171
piR-54750	GXN_558813	piR-hsa-17914	25.2866	-0.508892	0.230119	-2.21143	0.0270062	0.25477
piR-48593	GXN_550986	piR-hsa-10707	65.2683	0.738933	0.334806	2.20705	0.0273106	0.257236
piR-59619	GXN_564076	piR-hsa-22712	22.4149	0.555155	0.251624	2.20629	0.027364	0.257334
piR-58919	GXN_563361	piR-hsa-22055	39.8085	-0.663235	0.300822	-2.20474	0.0274723	0.257946
piR-43286	GXN_545269	piR-hsa-5466	16.6039	-0.653387	0.296766	-2.20169	0.0276872	0.258263
piR-51247	GXN_553412	piR-hsa-12946	74.715	-0.413389	0.187666	-2.20279	0.0276097	0.258263
piR-34280	GXN_568138	piR-hsa-26430	24.8001	-0.532111	0.241722	-2.20133	0.0277125	0.258263
piR-37700	GXN_571908	piR-hsa-29891	30.3054	-0.683687	0.310554	-2.20151	0.0277001	0.258263
piR-38891	GXN_573238	piR-hsa-31111	21.553	-0.63683	0.28931	-2.2012	0.0277219	0.258263
piR-47933	GXN_550295	piR-hsa-10076	20.5111	0.539627	0.245273	2.20011	0.027799	0.258578
piR-35196	GXN_569222	piR-hsa-27420	31.5938	0.46465	0.211283	2.19918	0.0278652	0.258792
piR-47742	GXN_549301	piR-hsa-9158	115.888	-0.684027	0.311149	-2.19839	0.0279214	0.258911
piR-49037	GXN_551580	piR-hsa-11254	14.6099	-0.740659	0.337107	-2.1971	0.028013	0.259359
piR-42548	GXN_544413	piR-hsa-4669	101.705	-0.667389	0.304509	-2.19169	0.0284021	0.262555
piR-55877	GXN_560083	piR-hsa-19062	29.7449	0.43651	0.19938	2.18933	0.0285728	0.263725
piR-48773	GXN_551184	piR-hsa-10887	12.8073	0.545429	0.249283	2.18799	0.0286705	0.263812
piR-39319	GXN_573688	piR-hsa-31523	75.977	-0.406075	0.185589	-2.18804	0.0286669	0.263812
piR-30327	GXN_539908	piR-hsa-524	42.2031	-0.335478	0.153449	-2.18625	0.0287974	0.264573
piR-31363	GXN_541065	piR-hsa-1588	14.7453	-0.662007	0.303275	-2.18286	0.0290459	0.265227
piR-31783	GXN_541471	piR-hsa-1965	85.4029	-0.358987	0.164446	-2.18302	0.0290346	0.265227
piR-34442	GXN_568314	piR-hsa-26592	69.5943	0.48264	0.220947	2.18442	0.0289315	0.265227
piR-34687	GXN_568583	piR-hsa-26837	157.274	0.565746	0.259162	2.18298	0.0290371	0.265227
piR-41247	GXN_543061	piR-hsa-3428	83.0482	-0.53292	0.244514	-2.17951	0.0292941	0.267024
piR-56919	GXN_561197	piR-hsa-20075	16.2857	-0.554323	0.254436	-2.17864	0.0293588	0.267024
piR-35466	GXN_568912	piR-hsa-27137	938.702	0.460414	0.211355	2.1784	0.0293766	0.267024
piR-33498	GXN_565097	piR-hsa-23649	213.602	0.630847	0.289685	2.1777	0.0294283	0.267087
piR-51439	GXN_555157	piR-hsa-14549	24.9867	0.781514	0.35906	2.17656	0.0295136	0.267456
piR-42239	GXN_544106	piR-hsa-4389	36.3134	-0.740974	0.340778	-2.17436	0.0296783	0.267887
piR-34888	GXN_568788	piR-hsa-27024	89.4403	0.517099	0.237754	2.17494	0.0296348	0.267887
piR-38461	GXN_572664	piR-hsa-30595	21.2839	0.791241	0.363935	2.17413	0.0296955	0.267887
piR-35589	GXN_569603	piR-hsa-27769	34.9286	-0.54727	0.251898	-2.17258	0.0298117	0.268126
piR-36260	GXN_570301	piR-hsa-28409	17.8865	0.591484	0.27224	2.17266	0.0298059	0.268126
piR-32648	GXN_553207	piR-hsa-12759	717.242	-0.640231	0.294879	-2.17117	0.0299186	0.268683
piR-34446	GXN_568319	piR-hsa-26596	43.232	-0.688302	0.317323	-2.16909	0.0300759	0.269691
piR-56501	GXN_559635	piR-hsa-18657	321.922	0.497117	0.229434	2.16671	0.0302568	0.270908
piR-35222	GXN_568899	piR-hsa-27125	13.5102	0.488991	0.225893	2.16471	0.0304101	0.271873
piR-42649	GXN_544522	piR-hsa-4770	62.8705	0.530614	0.245446	2.16183	0.0306311	0.273033
piR-47593	GXN_549937	piR-hsa-9750	17.6385	0.525091	0.242825	2.16242	0.0305856	0.273033
piR-41693	GXN_543546	piR-hsa-3874	14.3545	0.528381	0.244705	2.15926	0.03083	0.2743
piR-59333	GXN_563796	piR-hsa-22455	85.0815	-0.448899	0.207938	-2.15881	0.0308651	0.2743
piR-52343	GXN_556233	piR-hsa-15542	591.152	0.684348	0.317565	2.15499	0.0311629	0.275311
piR-55161	GXN_559233	piR-hsa-18296	18.6319	0.452089	0.209753	2.15534	0.0311354	0.275311
piR-57217	GXN_561506	piR-hsa-20358	18.305	-0.487938	0.226239	-2.15673	0.0310265	0.275311
piR-34156	GXN_568018	piR-hsa-26322	86.9833	0.674025	0.312712	2.15542	0.0311294	0.275311
piR-60051	GXN_565671	piR-hsa-24173	66.6673	0.361522	0.16791	2.15307	0.0313131	0.27623
piR-45699	GXN_547886	piR-hsa-7861	21.3051	0.581896	0.270672	2.14982	0.0315694	0.27734
piR-61651	GXN_567431	piR-hsa-25786	687.345	0.733514	0.341215	2.14971	0.0315781	0.27734
piR-34515	GXN_568394	piR-hsa-26665	95.0981	-0.83239	0.38705	-2.1506	0.0315079	0.27734
piR-50528	GXN_554225	piR-hsa-13696	29.6246	0.57205	0.266301	2.14813	0.0317036	0.278034
piR-56470	GXN_560719	piR-hsa-19640	33.5001	0.603087	0.280867	2.14724	0.0317744	0.278247
piR-42938	GXN_544943	piR-hsa-5161	590.25	-0.602138	0.28065	-2.14551	0.0319118	0.279042
piR-52472	GXN_556372	piR-hsa-15671	12.7192	-0.653765	0.30483	-2.14469	0.031978	0.279213
piR-32443	GXN_552983	piR-hsa-12554	36.2418	0.401703	0.187702	2.14011	0.0323461	0.280409
piR-58024	GXN_562416	piR-hsa-21191	13.0213	0.500933	0.233928	2.1414	0.0322421	0.280409
piR-58211	GXN_562622	piR-hsa-21378	444.063	-0.721104	0.336774	-2.14121	0.0322569	0.280409
piR-59456	GXN_563931	piR-hsa-22578	14.3737	0.67141	0.313444	2.14204	0.0321904	0.280409
piR-34801	GXN_568692	piR-hsa-26937	25.9402	-0.641156	0.299659	-2.13962	0.0323856	0.280409
piR-35212	GXN_568888	piR-hsa-27115	891.008	-0.813559	0.380259	-2.13949	0.0323963	0.280409
piR-36069	GXN_570093	piR-hsa-28218	478.365	-0.79819	0.373185	-2.13886	0.0324473	0.280444
piR-39556	GXN_573913	piR-hsa-31731	224.811	0.502632	0.235076	2.13817	0.0325032	0.280522
piR-47935	GXN_550297	piR-hsa-10078	133.573	-0.472223	0.220956	-2.13718	0.0325831	0.280728
piR-60938	GXN_566715	piR-hsa-25132	49.022	0.481019	0.22512	2.13672	0.032621	0.280728
piR-30166	GXN_539751	piR-hsa-378	63.1425	-0.82399	0.38692	-2.12961	0.0332037	0.285332
piR-30903	GXN_540489	piR-hsa-1056	16.1171	0.620016	0.291472	2.12719	0.033404	0.286398
piR-43710	GXN_545714	piR-hsa-5876	50.4965	0.829257	0.39	2.1263	0.0334784	0.286398
piR-52416	GXN_556312	piR-hsa-15615	27.9352	0.6328	0.297884	2.12432	0.0336436	0.286398
piR-33180	GXN_564764	piR-hsa-23346	15.1964	-0.44046	0.207273	-2.12502	0.0335849	0.286398
piR-33914	GXN_565537	piR-hsa-24050	30.9025	-0.79278	0.372869	-2.12616	0.0334899	0.286398
piR-60675	GXN_566335	piR-hsa-24782	30.6588	-0.626077	0.294821	-2.12358	0.033705	0.286398
piR-35468	GXN_568914	piR-hsa-27139	491.502	0.599361	0.282173	2.12409	0.0336626	0.286398
piR-39555	GXN_573912	piR-hsa-31730	226.469	0.497182	0.234132	2.12351	0.0337108	0.286398
piR-35280	GXN_569298	piR-hsa-27489	24.0226	0.613463	0.289043	2.12239	0.0338049	0.28679
piR-48803	GXN_551217	piR-hsa-10917	25.3965	0.580059	0.273467	2.12113	0.0339108	0.287281
piR-54191	GXN_558237	piR-hsa-17385	20.4166	-0.451435	0.213384	-2.11559	0.0343795	0.29084
piR-50551	GXN_554251	piR-hsa-13719	18.8969	-0.68147	0.322939	-2.11021	0.03484	0.292882
piR-59016	GXN_563466	piR-hsa-22152	31.7685	0.468393	0.221891	2.11092	0.0347793	0.292882
piR-61546	GXN_567315	piR-hsa-25681	157.347	-0.489995	0.232051	-2.11158	0.0347225	0.292882
piR-36554	GXN_570604	piR-hsa-28689	14.8193	-0.537856	0.254823	-2.1107	0.0347979	0.292882
piR-37246	GXN_571434	piR-hsa-29451	32.7726	-0.580595	0.275175	-2.10991	0.0348657	0.292882
piR-55885	GXN_560092	piR-hsa-19070	14.9856	0.57254	0.271442	2.10926	0.0349224	0.292936
piR-35729	GXN_568945	piR-hsa-27167	26.7763	0.468521	0.222185	2.1087	0.0349702	0.292936
piR-54782	GXN_558848	piR-hsa-17946	48.6413	0.643917	0.305655	2.10668	0.0351456	0.293994
piR-38582	GXN_572792	piR-hsa-30716	62.2053	0.574139	0.27263	2.10593	0.0352106	0.294126
piR-47173	GXN_549532	piR-hsa-9373	43.6091	0.573478	0.272428	2.10506	0.0352859	0.294345
piR-42634	GXN_544506	piR-hsa-4755	16.8822	0.618113	0.293835	2.10361	0.0354127	0.294581
piR-32312	GXN_552841	piR-hsa-12424	13.2983	-0.463976	0.220559	-2.10364	0.0354098	0.294581
piR-48003	GXN_550354	piR-hsa-10131	219.69	0.678246	0.322542	2.10281	0.035482	0.294747
piR-45168	GXN_547350	piR-hsa-7375	445.744	0.614969	0.292591	2.1018	0.0355708	0.295074
piR-32878	GXN_553570	piR-hsa-13089	76.5529	0.647924	0.308679	2.09902	0.0358149	0.296585
piR-50437	GXN_554158	piR-hsa-13634	132.66	0.459454	0.218933	2.0986	0.035852	0.296585
piR-42753	GXN_544744	piR-hsa-4976	62.4422	0.60301	0.287999	2.09379	0.0362786	0.299286
piR-33896	GXN_565517	piR-hsa-24032	78.3777	0.509986	0.243516	2.09426	0.0362365	0.299286
piR-40233	GXN_541911	piR-hsa-2372	20.5543	-0.636393	0.304099	-2.09271	0.0363747	0.299551
piR-33382	GXN_564971	piR-hsa-23533	4614.02	-0.459182	0.219462	-2.09231	0.0364109	0.299551
piR-44133	GXN_546161	piR-hsa-6284	33.7313	-0.385952	0.184653	-2.09015	0.0366047	0.300509
piR-59224	GXN_563692	piR-hsa-22360	61.4763	-0.662837	0.317164	-2.08989	0.0366279	0.300509
piR-32842	GXN_553531	piR-hsa-13053	136.567	0.49936	0.239112	2.0884	0.036762	0.301197
piR-39772	GXN_574128	piR-hsa-31930	17.5518	-0.687002	0.329293	-2.08629	0.0369521	0.30234
piR-61439	GXN_567213	piR-hsa-25588	16.5437	0.76658	0.367701	2.08479	0.0370882	0.303039
piR-52830	GXN_556707	piR-hsa-15983	58.1711	-0.606133	0.290999	-2.08294	0.0372566	0.303173
piR-54110	GXN_558148	piR-hsa-17304	21.1868	-0.71956	0.345374	-2.08342	0.0372126	0.303173
piR-60076	GXN_565698	piR-hsa-24198	52.4272	-0.526063	0.252424	-2.08404	0.0371562	0.303173
piR-43819	GXN_545834	piR-hsa-5985	67.3025	0.691884	0.332602	2.08022	0.0375057	0.304785
piR-45012	GXN_547182	piR-hsa-7221	29.6507	0.332877	0.160259	2.07712	0.03779	0.306679
piR-58514	GXN_562936	piR-hsa-21667	29.1199	-0.630619	0.304228	-2.07285	0.038186	0.309472
piR-49754	GXN_552269	piR-hsa-11896	192.871	-0.50837	0.24532	-2.07228	0.0382396	0.309487
piR-45240	GXN_546825	piR-hsa-6896	2051.77	-0.665386	0.321351	-2.07059	0.038397	0.309505
piR-51267	GXN_554969	piR-hsa-14377	28.8617	0.414121	0.199917	2.07147	0.038315	0.309505
piR-56058	GXN_560266	piR-hsa-19228	539.439	0.608682	0.293956	2.07066	0.0383909	0.309505
piR-42266	GXN_544136	piR-hsa-4416	35.8445	-0.712569	0.344589	-2.06788	0.0386513	0.310996
piR-36874	GXN_570952	piR-hsa-29008	217.251	0.706389	0.341662	2.06751	0.038686	0.310996
piR-59068	GXN_563523	piR-hsa-22204	662.515	0.603755	0.292346	2.06521	0.0389032	0.312322
piR-47604	GXN_549949	piR-hsa-9761	20.959	0.509254	0.246846	2.06305	0.0391082	0.313127
piR-48800	GXN_551213	piR-hsa-10914	53.7989	-0.562047	0.272387	-2.06342	0.039073	0.313127
piR-49252	GXN_551776	piR-hsa-11440	17.9911	0.559358	0.27142	2.06086	0.0393168	0.314242
piR-55957	GXN_560171	piR-hsa-19142	14.0872	0.517401	0.251107	2.06048	0.0393526	0.314242
piR-59320	GXN_563781	piR-hsa-22442	183.185	-0.554562	0.269294	-2.05932	0.0394638	0.314292
piR-60533	GXN_566181	piR-hsa-24640	23.6164	0.537238	0.260813	2.05985	0.0394124	0.314292
piR-30643	GXN_540221	piR-hsa-811	23.0163	0.45956	0.223434	2.0568	0.0397055	0.31513
piR-42247	GXN_544115	piR-hsa-4397	165.316	0.593818	0.288852	2.05579	0.0398029	0.31513
piR-42507	GXN_544368	piR-hsa-4628	155.747	-0.586206	0.285012	-2.05678	0.0397076	0.31513
piR-38240	GXN_572427	piR-hsa-30374	272.201	0.518365	0.252187	2.05548	0.0398325	0.31513
piR-39990	GXN_573041	piR-hsa-30947	14.8128	0.545056	0.265036	2.05653	0.0397312	0.31513
piR-60515	GXN_566161	piR-hsa-24622	38.4696	-0.581053	0.28295	-2.05355	0.0400193	0.31619
piR-55784	GXN_559981	piR-hsa-18969	35.1931	0.501333	0.244355	2.05166	0.0402028	0.316802
piR-60680	GXN_566340	piR-hsa-24787	64.1028	0.551496	0.26879	2.05177	0.0401917	0.316802
piR-35982	GXN_569999	piR-hsa-28131	413.287	0.496153	0.24199	2.0503	0.040335	0.317426
piR-30677	GXN_540258	piR-hsa-845	33.5294	0.738259	0.360984	2.04513	0.0408421	0.31891
piR-43969	GXN_544674	piR-hsa-4911	37.3868	0.364178	0.178072	2.04512	0.0408435	0.31891
piR-44878	GXN_547051	piR-hsa-7102	37.7334	0.489841	0.239496	2.0453	0.0408255	0.31891
piR-58157	GXN_562562	piR-hsa-21324	42.9536	-0.682637	0.333682	-2.04577	0.0407791	0.31891
piR-59126	GXN_563587	piR-hsa-22262	46.602	0.777156	0.379642	2.04708	0.0406506	0.31891
piR-59922	GXN_564515	piR-hsa-23117	25.5731	-0.500479	0.244612	-2.04601	0.0407551	0.31891
piR-48264	GXN_550640	piR-hsa-10392	13.0817	-0.584325	0.285873	-2.04401	0.0409529	0.319348
piR-41799	GXN_543645	piR-hsa-3966	25.2543	-0.362297	0.177359	-2.04273	0.0410793	0.319499
piR-55078	GXN_559141	piR-hsa-18213	33.3262	-0.441968	0.216334	-2.04299	0.0410536	0.319499
piR-32782	GXN_553465	piR-hsa-12993	333.423	0.659506	0.323014	2.04173	0.0411785	0.319856
piR-42678	GXN_544554	piR-hsa-4799	80.4495	-0.675329	0.331305	-2.03839	0.041511	0.321187
piR-52199	GXN_556080	piR-hsa-15398	82.1881	-0.614611	0.301369	-2.0394	0.0414105	0.321187
piR-36034	GXN_570055	piR-hsa-28183	20.3915	-0.713407	0.349911	-2.03883	0.0414673	0.321187
piR-34095	GXN_567951	piR-hsa-26261	52.0265	0.305505	0.149921	2.03778	0.0415723	0.321245
piR-60366	GXN_566014	piR-hsa-24488	60.0873	0.587318	0.288314	2.03708	0.0416423	0.321371
piR-52467	GXN_556367	piR-hsa-15666	48.3953	0.55254	0.271572	2.0346	0.0418914	0.321734
piR-56554	GXN_560796	piR-hsa-19710	276.114	-0.560645	0.275573	-2.03447	0.0419045	0.321734
piR-36174	GXN_570208	piR-hsa-28323	1121.14	-0.66332	0.325831	-2.03578	0.0417727	0.321734
piR-39087	GXN_573451	piR-hsa-31306	1479.07	-0.704875	0.346376	-2.035	0.0418512	0.321734
piR-50569	GXN_554270	piR-hsa-13737	12.8515	0.444451	0.218573	2.03342	0.0420104	0.322133
piR-53177	GXN_557068	piR-hsa-16315	33.3751	0.513849	0.252839	2.03232	0.0421211	0.322569
piR-33650	GXN_565247	piR-hsa-23786	338.027	-0.400917	0.197374	-2.03125	0.0422293	0.322984
piR-33495	GXN_565094	piR-hsa-23646	21.3253	-0.518619	0.255421	-2.03045	0.0423112	0.323197
piR-30954	GXN_540528	piR-hsa-1093	23.9664	0.753786	0.371642	2.02826	0.0425338	0.324202
piR-32882	GXN_553575	piR-hsa-13093	34.4056	-0.695314	0.342909	-2.02769	0.0425915	0.324202
piR-58038	GXN_562431	piR-hsa-21205	21.5364	0.790595	0.389925	2.02756	0.0426054	0.324202
piR-58152	GXN_562557	piR-hsa-21319	13.9339	0.383635	0.189389	2.02565	0.0428006	0.325274
piR-54686	GXN_558759	piR-hsa-17864	78.5849	0.599605	0.296272	2.02383	0.0429876	0.325454
piR-54842	GXN_558914	piR-hsa-18006	17.1557	-0.473927	0.23414	-2.02412	0.0429579	0.325454
piR-36063	GXN_570086	piR-hsa-28212	1596.42	0.700815	0.346104	2.02487	0.0428805	0.325454
piR-31682	GXN_541392	piR-hsa-1893	161.804	0.675477	0.334052	2.02207	0.0431694	0.326005
piR-43705	GXN_545709	piR-hsa-5871	42.9679	-0.662362	0.327506	-2.02244	0.043131	0.326005
piR-51324	GXN_555032	piR-hsa-14434	20.1158	0.626039	0.309913	2.02005	0.0433787	0.327173
piR-50444	GXN_554166	piR-hsa-13641	414.747	0.41795	0.207172	2.0174	0.0436537	0.32784
piR-51215	GXN_554929	piR-hsa-14339	47.7865	-0.733927	0.363808	-2.01735	0.0436593	0.32784
piR-54552	GXN_558612	piR-hsa-17730	24.9288	-0.390875	0.193837	-2.01651	0.0437467	0.32784
piR-59614	GXN_564071	piR-hsa-22707	44.5965	0.393728	0.195298	2.01604	0.0437961	0.32784
piR-33981	GXN_565611	piR-hsa-24117	42.8547	-0.341412	0.169341	-2.01613	0.0437866	0.32784
piR-39349	GXN_573720	piR-hsa-31553	37.7028	0.431058	0.213557	2.01847	0.0435423	0.32784
piR-56805	GXN_561072	piR-hsa-19961	64.1962	0.467747	0.232211	2.01432	0.0439761	0.327957
piR-36248	GXN_570288	piR-hsa-28397	674.222	0.752717	0.373607	2.01473	0.0439329	0.327957
piR-39471	GXN_572982	piR-hsa-30893	89.1821	0.724392	0.359446	2.0153	0.0438729	0.327957
piR-49784	GXN_552302	piR-hsa-11926	16.0018	0.507056	0.252252	2.01012	0.0444188	0.330845
piR-59155	GXN_563619	piR-hsa-22291	41.8659	0.534448	0.265993	2.00926	0.0445099	0.331112
piR-38447	GXN_572650	piR-hsa-30581	164.954	-0.679902	0.338608	-2.00793	0.0446508	0.331747
piR-57755	GXN_562044	piR-hsa-20852	2641.51	0.404733	0.201747	2.00614	0.0448412	0.332748
piR-45213	GXN_546796	piR-hsa-6869	17.8716	-0.478061	0.238664	-2.00307	0.0451694	0.334768
piR-31550	GXN_541251	piR-hsa-1761	14.8886	-0.780569	0.389979	-2.00157	0.0453313	0.335552
piR-33636	GXN_565232	piR-hsa-23772	78.4487	-0.594576	0.297243	-2.0003	0.0454678	0.336147
piR-40964	GXN_542783	piR-hsa-3175	138.751	-0.762574	0.381623	-1.99824	0.0456904	0.336546
piR-42227	GXN_544094	piR-hsa-4377	54.5292	-0.744868	0.373068	-1.9966	0.0458688	0.336546
piR-45643	GXN_547825	piR-hsa-7805	86.7125	0.331665	0.165973	1.99831	0.045683	0.336546
piR-51451	GXN_555171	piR-hsa-14561	16.0065	-0.449635	0.225158	-1.99698	0.0458278	0.336546
piR-52527	GXN_556415	piR-hsa-15711	20.4107	-0.747558	0.374474	-1.99629	0.0459025	0.336546
piR-34443	GXN_568315	piR-hsa-26593	138.709	0.447506	0.224182	1.99617	0.0459156	0.336546
piR-37508	GXN_571700	piR-hsa-29699	23.4101	-0.40808	0.204227	-1.99817	0.0456978	0.336546
piR-36247	GXN_570287	piR-hsa-28396	660.497	0.749117	0.375789	1.99345	0.0462119	0.338303
piR-31672	GXN_541382	piR-hsa-1883	17.3417	0.607342	0.304816	1.99249	0.0463178	0.338664
piR-31212	GXN_540899	piR-hsa-1437	13.0606	-0.517398	0.260119	-1.98908	0.0466922	0.339073
piR-31661	GXN_541371	piR-hsa-1872	225.858	-0.505363	0.253853	-1.99077	0.0465061	0.339073
piR-42072	GXN_543942	piR-hsa-4237	14.0423	0.362326	0.182169	1.98895	0.0467064	0.339073
piR-42976	GXN_544624	piR-hsa-4864	209.713	-0.649001	0.326172	-1.98975	0.0466184	0.339073
piR-42826	GXN_544823	piR-hsa-5049	75.6682	-0.414685	0.208255	-1.99123	0.0464552	0.339073
piR-36418	GXN_570473	piR-hsa-28567	181.579	0.719582	0.361802	1.98888	0.046714	0.339073
piR-42415	GXN_544299	piR-hsa-4565	19.0593	-0.44484	0.223876	-1.98699	0.0469232	0.339356
piR-32294	GXN_552821	piR-hsa-12406	273.24	-0.50287	0.253045	-1.98728	0.0468917	0.339356
piR-56049	GXN_560256	piR-hsa-19219	139.829	0.48193	0.242427	1.98794	0.0468188	0.339356
piR-44652	GXN_546707	piR-hsa-6788	46.9556	0.439003	0.221032	1.98615	0.047017	0.339457
piR-34943	GXN_568848	piR-hsa-27079	37.2815	-0.50068	0.252125	-1.98584	0.0470506	0.339457
piR-40906	GXN_542721	piR-hsa-3118	35.8206	-0.570651	0.287516	-1.98477	0.0471706	0.339503
piR-59203	GXN_563669	piR-hsa-22339	22.4709	0.413905	0.208522	1.98495	0.0471504	0.339503
piR-46199	GXN_548417	piR-hsa-8346	461.449	-0.670189	0.337936	-1.98318	0.0473469	0.340363
piR-40420	GXN_542112	piR-hsa-2559	1297.61	-0.449151	0.227049	-1.97821	0.0479054	0.343964
piR-41684	GXN_543536	piR-hsa-3865	27.0138	0.489293	0.247655	1.9757	0.0481883	0.3454
piR-43201	GXN_545195	piR-hsa-5395	14.4427	-0.408451	0.20682	-1.97491	0.0482786	0.3454
piR-36655	GXN_570716	piR-hsa-28789	171.417	-0.367103	0.185846	-1.97531	0.0482334	0.3454
piR-41297	GXN_543116	piR-hsa-3478	68.2498	0.553089	0.280209	1.97385	0.0483993	0.345849
piR-42308	GXN_544182	piR-hsa-4458	51.0801	-0.561154	0.284478	-1.97258	0.048544	0.346469
piR-30640	GXN_540217	piR-hsa-808	14.7644	-0.456611	0.23179	-1.96994	0.0488452	0.347506
piR-41836	GXN_543686	piR-hsa-4003	14.3567	0.479938	0.243546	1.97063	0.0487666	0.347506
piR-52905	GXN_556788	piR-hsa-16058	98.2759	-0.554529	0.281662	-1.96877	0.0489791	0.347506
piR-56983	GXN_559637	piR-hsa-18659	14.4286	0.635078	0.322576	1.96877	0.0489796	0.347506
piR-33117	GXN_564696	piR-hsa-23283	54.4633	-0.516106	0.262098	-1.96914	0.0489373	0.347506
piR-31537	GXN_541237	piR-hsa-1748	163.255	0.301938	0.153842	1.96265	0.0496868	0.347834
piR-40419	GXN_542111	piR-hsa-2558	1351.29	-0.447018	0.227944	-1.96108	0.0498692	0.347834
piR-42461	GXN_542513	piR-hsa-2927	19.8905	-0.633397	0.323092	-1.96042	0.0499465	0.347834
piR-41525	GXN_543362	piR-hsa-3706	70.2851	0.517694	0.263942	1.96139	0.0498335	0.347834
piR-42028	GXN_543893	piR-hsa-4193	66.6942	-0.53367	0.272952	-1.95518	0.0505622	0.347834
piR-42531	GXN_544395	piR-hsa-4652	13.7634	0.368132	0.188361	1.9544	0.0506543	0.347834
piR-42532	GXN_544396	piR-hsa-4653	18.9889	-0.533738	0.272493	-1.95872	0.0501457	0.347834
piR-42755	GXN_544746	piR-hsa-4978	57.7681	0.473724	0.24206	1.95705	0.0503414	0.347834
piR-42810	GXN_544805	piR-hsa-5033	43.0598	-0.360906	0.184654	-1.9545	0.050642	0.347834
piR-43005	GXN_544985	piR-hsa-5199	64.914	-0.697801	0.354765	-1.96694	0.0491901	0.347834
piR-45036	GXN_547208	piR-hsa-7245	12.9119	0.418107	0.213852	1.95512	0.0505685	0.347834
piR-46563	GXN_548797	piR-hsa-8692	18.7973	0.465163	0.237693	1.95699	0.0503482	0.347834
piR-46752	GXN_548985	piR-hsa-8867	25.2374	-0.454087	0.23111	-1.96481	0.0494367	0.347834
piR-46961	GXN_549211	piR-hsa-9076	54.8119	-0.675687	0.343816	-1.96526	0.0493846	0.347834
piR-48864	GXN_551283	piR-hsa-10978	13.7249	0.423678	0.21661	1.95595	0.0504714	0.347834
piR-49189	GXN_551739	piR-hsa-11406	15.6798	-0.74123	0.378561	-1.95802	0.050228	0.347834
piR-51107	GXN_554811	piR-hsa-14231	86.3871	-0.713565	0.364514	-1.95758	0.0502793	0.347834
piR-51345	GXN_555055	piR-hsa-14455	61.3148	-0.399525	0.204257	-1.95599	0.0504667	0.347834
piR-56445	GXN_560692	piR-hsa-19615	79.9269	-0.426886	0.217717	-1.96074	0.0499094	0.347834
piR-58408	GXN_562821	piR-hsa-21561	13.1923	0.46212	0.235872	1.9592	0.0500898	0.347834
piR-59122	GXN_563583	piR-hsa-22258	18.1103	0.580896	0.295692	1.96453	0.0494688	0.347834
piR-33059	GXN_564632	piR-hsa-23225	92.2054	-0.687275	0.350488	-1.96091	0.0498898	0.347834
piR-60156	GXN_565784	piR-hsa-24278	16.3504	-0.710298	0.362191	-1.96112	0.0498656	0.347834
piR-61896	GXN_567681	piR-hsa-26016	19.6191	-0.465765	0.237496	-1.96115	0.0498616	0.347834
piR-36289	GXN_570332	piR-hsa-28438	16.921	0.41055	0.20902	1.96416	0.0495113	0.347834
piR-36352	GXN_570401	piR-hsa-28501	18.5712	0.700121	0.357274	1.95962	0.0500402	0.347834
piR-37479	GXN_571668	piR-hsa-29670	13.5551	-0.42633	0.216928	-1.96531	0.0493785	0.347834
piR-37758	GXN_571940	piR-hsa-29920	17.0024	0.449948	0.22999	1.95638	0.0504205	0.347834
piR-52469	GXN_556369	piR-hsa-15668	333.851	-0.429152	0.219836	-1.95214	0.0509213	0.348866
piR-56476	GXN_560726	piR-hsa-19646	19.8147	-0.572792	0.293349	-1.9526	0.050867	0.348866
piR-44238	GXN_546276	piR-hsa-6389	14.8996	0.486	0.24906	1.95134	0.0510169	0.349121
piR-30426	GXN_539452	piR-hsa-170	35.7624	-0.397815	0.204106	-1.94905	0.051289	0.3493
piR-30452	GXN_540013	piR-hsa-620	51.1132	-0.681294	0.349514	-1.94926	0.0512643	0.3493
piR-45726	GXN_546848	piR-hsa-6917	15.8752	-0.740216	0.379899	-1.94845	0.0513607	0.3493
piR-47664	GXN_550015	piR-hsa-9821	19.367	0.508935	0.261089	1.94928	0.051262	0.3493
piR-58413	GXN_562827	piR-hsa-21566	33.9387	0.693479	0.355896	1.94854	0.0513501	0.3493
piR-61080	GXN_566855	piR-hsa-25259	95.4125	-0.616773	0.316589	-1.94818	0.0513935	0.3493
piR-45652	GXN_547835	piR-hsa-7814	50.4946	0.592263	0.304497	1.94505	0.0517687	0.351451
piR-38523	GXN_572730	piR-hsa-30657	28.1511	-0.649942	0.334321	-1.94406	0.0518879	0.351861
piR-41642	GXN_543490	piR-hsa-3823	32.3397	-0.360403	0.185455	-1.94334	0.051975	0.352053
piR-32204	GXN_552739	piR-hsa-12330	21.1722	0.441976	0.227656	1.94142	0.0522076	0.353228
piR-31614	GXN_541321	piR-hsa-1825	40.0609	0.663268	0.341887	1.94002	0.0523775	0.353977
piR-44730	GXN_546776	piR-hsa-6851	25.5273	-0.477229	0.246069	-1.93941	0.0524516	0.354078
piR-42864	GXN_544863	piR-hsa-5087	24.4169	-0.513332	0.264996	-1.93713	0.0527297	0.355154
piR-57539	GXN_561808	piR-hsa-20636	15.3991	0.430828	0.222357	1.93755	0.0526776	0.355154
piR-41281	GXN_543099	piR-hsa-3462	14.2621	-0.489085	0.252633	-1.93595	0.0528739	0.355325
piR-57364	GXN_561634	piR-hsa-20476	23.0023	-0.75034	0.387565	-1.93604	0.0528629	0.355325
piR-43370	GXN_545360	piR-hsa-5550	35.7986	-0.643498	0.332756	-1.93385	0.0531321	0.35615
piR-52481	GXN_555247	piR-hsa-14631	13.2859	0.576109	0.297962	1.93349	0.0531753	0.35615
piR-33581	GXN_565173	piR-hsa-23717	407.147	0.580693	0.300187	1.93444	0.0530594	0.35615
piR-42819	GXN_544815	piR-hsa-5042	18.2873	-0.371312	0.192111	-1.9328	0.0532608	0.356323
piR-61304	GXN_567068	piR-hsa-25453	62.4432	-0.639706	0.331212	-1.93141	0.0534321	0.35707
piR-55765	GXN_559960	piR-hsa-18950	161.316	0.708033	0.366831	1.93013	0.0535902	0.357328
piR-60746	GXN_564330	piR-hsa-22948	176.942	0.403445	0.209007	1.93029	0.0535703	0.357328
piR-45165	GXN_547347	piR-hsa-7372	1404.48	-0.513224	0.266247	-1.92762	0.0539018	0.358207
piR-52341	GXN_556231	piR-hsa-15540	160.885	-0.29913	0.155157	-1.92792	0.0538654	0.358207
piR-34611	GXN_568499	piR-hsa-26761	27.0172	0.377623	0.195839	1.92824	0.0538257	0.358207
piR-50894	GXN_554609	piR-hsa-14048	38.3828	-0.62148	0.322616	-1.92638	0.0540573	0.358842
piR-59033	GXN_563485	piR-hsa-22169	19.9614	0.59942	0.311293	1.92558	0.0541566	0.359103
piR-31179	GXN_539512	piR-hsa-225	91.7954	-0.518395	0.269774	-1.92159	0.0546571	0.359333
piR-44686	GXN_546744	piR-hsa-6822	62.6763	0.725316	0.377432	1.92171	0.0546417	0.359333
piR-47428	GXN_549792	piR-hsa-9614	17.7425	0.446077	0.232154	1.92147	0.054672	0.359333
piR-51388	GXN_555102	piR-hsa-14498	17.6823	-0.637333	0.331344	-1.92348	0.0544198	0.359333
piR-61005	GXN_566425	piR-hsa-24866	13.2289	-0.371954	0.193292	-1.92431	0.0543154	0.359333
piR-36249	GXN_570289	piR-hsa-28398	743.905	0.704848	0.366739	1.92194	0.0546138	0.359333
piR-37773	GXN_571956	piR-hsa-29935	20.531	-0.427233	0.222278	-1.92206	0.0545979	0.359333
piR-37819	GXN_572005	piR-hsa-29981	14.2689	0.371574	0.193266	1.92261	0.0545292	0.359333
piR-33910	GXN_565532	piR-hsa-24046	15.0802	-0.397253	0.206828	-1.92069	0.054771	0.359589
piR-47815	GXN_550165	piR-hsa-9958	17.7806	-0.747085	0.389791	-1.91663	0.0552847	0.3598
piR-49134	GXN_551681	piR-hsa-11351	18.3571	-0.747756	0.390009	-1.91728	0.0552024	0.3598
piR-32608	GXN_553163	piR-hsa-12719	4121.71	0.574936	0.299765	1.91795	0.0551168	0.3598
piR-52677	GXN_556576	piR-hsa-15860	19.9374	0.689305	0.359557	1.91709	0.0552262	0.3598
piR-54269	GXN_558305	piR-hsa-17448	22.2292	0.324828	0.169292	1.91875	0.0550162	0.3598
piR-57577	GXN_561849	piR-hsa-20674	20.9995	0.591423	0.308435	1.91749	0.0551752	0.3598
piR-58986	GXN_563433	piR-hsa-22122	33.2098	0.557393	0.290503	1.91872	0.0550201	0.3598
piR-36463	GXN_568968	piR-hsa-27189	25.0219	-0.731784	0.381235	-1.91951	0.0549196	0.3598
piR-35304	GXN_569324	piR-hsa-27513	466.471	-0.724677	0.378192	-1.91616	0.0553446	0.3598
piR-42778	GXN_544771	piR-hsa-5001	21.9977	0.428444	0.223735	1.91496	0.0554975	0.360011
piR-34336	GXN_568199	piR-hsa-26486	22.9905	0.33521	0.175046	1.91499	0.0554943	0.360011
piR-52121	GXN_555995	piR-hsa-15320	15.1494	0.674848	0.352529	1.91431	0.0555811	0.360086
piR-35469	GXN_568915	piR-hsa-27140	712.873	0.472749	0.247005	1.91393	0.0556294	0.360086
piR-57516	GXN_561783	piR-hsa-20613	473.145	0.55973	0.292811	1.91158	0.0559307	0.3612
piR-34924	GXN_568827	piR-hsa-27060	35.5846	-0.658837	0.344777	-1.91091	0.0560165	0.3612
piR-39309	GXN_573677	piR-hsa-31513	14.3577	-0.507306	0.265507	-1.91071	0.0560419	0.3612
piR-39907	GXN_574275	piR-hsa-32065	64.0099	-0.426311	0.223118	-1.9107	0.056043	0.3612
piR-51013	GXN_554708	piR-hsa-14138	56.6714	-0.744798	0.390032	-1.90958	0.0561872	0.361739
piR-44324	GXN_546371	piR-hsa-6475	13.915	0.726279	0.380894	1.90678	0.0565496	0.363056
piR-49116	GXN_551663	piR-hsa-11333	34.3674	-0.457942	0.240189	-1.90659	0.0565738	0.363056
piR-61419	GXN_567191	piR-hsa-25568	40.0526	0.498446	0.261397	1.90686	0.0565392	0.363056
piR-53580	GXN_557587	piR-hsa-16788	26.611	0.693344	0.363896	1.90534	0.0567362	0.363318
piR-36015	GXN_570035	piR-hsa-28164	14.0276	0.453119	0.237802	1.90544	0.0567223	0.363318
piR-47808	GXN_550157	piR-hsa-9951	36.5531	-0.326754	0.17164	-1.90372	0.0569471	0.364278
piR-40654	GXN_542352	piR-hsa-2778	16.1103	-0.579356	0.30441	-1.90321	0.0570137	0.364315
piR-46898	GXN_549143	piR-hsa-9013	43.0315	-0.526973	0.277133	-1.90152	0.0572343	0.365334
piR-43106	GXN_545092	piR-hsa-5300	12.8655	0.523467	0.275712	1.8986	0.0576172	0.366955
piR-44329	GXN_546376	piR-hsa-6480	30.44	-0.64937	0.342101	-1.89818	0.0576722	0.366955
piR-52098	GXN_555969	piR-hsa-15297	14.9522	0.392073	0.206509	1.89858	0.0576196	0.366955
piR-38737	GXN_573070	piR-hsa-30959	24.2396	0.363065	0.191332	1.89757	0.0577534	0.367081
piR-44935	GXN_547114	piR-hsa-7159	70.2797	-0.714809	0.377217	-1.89496	0.0580981	0.3681
piR-54872	GXN_558947	piR-hsa-18036	94.0928	-0.738853	0.389886	-1.89505	0.058086	0.3681
piR-61514	GXN_566472	piR-hsa-24909	21.0055	0.427135	0.225406	1.89496	0.0580983	0.3681
piR-53164	GXN_557054	piR-hsa-16302	14.4527	0.472284	0.249359	1.89399	0.0582259	0.368517
piR-42969	GXN_544616	piR-hsa-4857	79.4349	-0.67547	0.356778	-1.89325	0.0583243	0.36875
piR-55775	GXN_559971	piR-hsa-18960	17.7486	0.423365	0.223722	1.89238	0.0584409	0.369097
piR-41997	GXN_543860	piR-hsa-4162	15.6386	0.542883	0.287329	1.88941	0.0588365	0.369105
piR-46222	GXN_546866	piR-hsa-6933	15.0725	0.50126	0.265338	1.88913	0.0588741	0.369105
piR-47305	GXN_549660	piR-hsa-9491	2411.77	0.396956	0.210096	1.8894	0.0588377	0.369105
piR-57185	GXN_561472	piR-hsa-20326	159.837	-0.530048	0.280431	-1.89012	0.0587422	0.369105
piR-35732	GXN_568948	piR-hsa-27170	169.316	-0.728093	0.38511	-1.89061	0.0586763	0.369105
piR-38437	GXN_572639	piR-hsa-30571	31.9333	-0.39707	0.210018	-1.89065	0.0586708	0.369105
piR-39338	GXN_573709	piR-hsa-31542	59.0396	0.592636	0.313478	1.89052	0.0586885	0.369105
piR-31944	GXN_541645	piR-hsa-2126	41.2288	-0.730918	0.387056	-1.8884	0.0589716	0.369215
piR-51844	GXN_555709	piR-hsa-15057	15.402	0.382291	0.202503	1.88783	0.0590492	0.369215
piR-34414	GXN_568284	piR-hsa-26564	52.6246	0.549256	0.290978	1.88762	0.0590768	0.369215
piR-48566	GXN_550956	piR-hsa-10680	25.8266	-0.30224	0.160216	-1.88645	0.0592337	0.369423
piR-56511	GXN_560749	piR-hsa-19667	33.6237	-0.45691	0.242168	-1.88675	0.0591938	0.369423
piR-35668	GXN_569688	piR-hsa-27847	1347.53	0.598568	0.317578	1.88479	0.059458	0.370436
piR-52004	GXN_555867	piR-hsa-15203	13.3123	-0.638712	0.339146	-1.8833	0.0596599	0.370921
piR-39299	GXN_573666	piR-hsa-31503	13.9131	-0.724441	0.384604	-1.8836	0.0596188	0.370921
piR-55013	GXN_559070	piR-hsa-18148	18.4142	0.600308	0.31899	1.8819	0.0598491	0.371325
piR-36246	GXN_570286	piR-hsa-28395	85.6442	0.711768	0.378211	1.88194	0.0598448	0.371325
piR-45913	GXN_548105	piR-hsa-8060	16.8539	-0.560464	0.298282	-1.87898	0.0602478	0.373411
piR-61701	GXN_567484	piR-hsa-25836	20.8243	0.453534	0.241451	1.87837	0.0603307	0.373538
piR-34673	GXN_568567	piR-hsa-26823	66.4628	-0.483507	0.257484	-1.87782	0.0604064	0.37362
piR-41063	GXN_542876	piR-hsa-3259	74.2067	-0.602858	0.32129	-1.87637	0.0606051	0.373735
piR-42563	GXN_544430	piR-hsa-4684	104.214	0.335903	0.179025	1.87629	0.0606161	0.373735
piR-47807	GXN_550156	piR-hsa-9950	37.6066	-0.57849	0.308387	-1.87586	0.0606749	0.373735
piR-53175	GXN_557066	piR-hsa-16313	13.5373	0.631413	0.33642	1.87686	0.0605371	0.373735
piR-32714	GXN_553278	piR-hsa-12825	43.6971	-0.59671	0.318475	-1.87365	0.0609793	0.374669
piR-54195	GXN_558241	piR-hsa-17389	21.5881	0.339609	0.18128	1.87339	0.0610145	0.374669
piR-37950	GXN_572144	piR-hsa-30112	20.527	0.395332	0.210976	1.87382	0.0609546	0.374669
piR-35516	GXN_569523	piR-hsa-27696	17.6946	-0.529494	0.282779	-1.87247	0.0611418	0.375066
piR-37578	GXN_571776	piR-hsa-29769	24.17	-0.576628	0.308183	-1.87106	0.0613374	0.37588
piR-43259	GXN_545239	piR-hsa-5439	25.5145	-0.438533	0.234516	-1.86995	0.0614907	0.376304
piR-36510	GXN_570557	piR-hsa-28645	51.0957	0.581496	0.311019	1.86965	0.0615324	0.376304
piR-46323	GXN_548537	piR-hsa-8455	18.8126	-0.543961	0.291226	-1.86783	0.0617859	0.377469
piR-56395	GXN_560637	piR-hsa-19565	14.2493	0.649879	0.348319	1.86576	0.062075	0.378485
piR-37206	GXN_571061	piR-hsa-29107	15.7291	-0.418404	0.224257	-1.86573	0.0620788	0.378485
piR-55151	GXN_559222	piR-hsa-18286	1495.11	-0.637726	0.342274	-1.86321	0.0624334	0.380259
piR-30175	GXN_539432	piR-hsa-152	498.297	0.64775	0.348206	1.86025	0.0628504	0.380473
piR-40295	GXN_541978	piR-hsa-2434	871.594	-0.725867	0.390036	-1.86102	0.0627409	0.380473
piR-45585	GXN_547761	piR-hsa-7748	13.8955	0.573779	0.308458	1.86015	0.0628638	0.380473
piR-49064	GXN_551608	piR-hsa-11281	20.8028	-0.412192	0.221686	-1.85935	0.0629775	0.380473
piR-49895	GXN_552423	piR-hsa-12037	91.547	0.548628	0.295042	1.85949	0.0629579	0.380473
piR-52079	GXN_555948	piR-hsa-15278	111.091	0.428929	0.230426	1.86146	0.0626788	0.380473
piR-53292	GXN_557162	piR-hsa-16401	14.78	-0.371717	0.199801	-1.86043	0.062824	0.380473
piR-55150	GXN_559220	piR-hsa-18285	1503.92	-0.635272	0.341608	-1.85965	0.0629347	0.380473
piR-31065	GXN_540646	piR-hsa-1204	26.9246	-0.379875	0.204545	-1.85717	0.0632866	0.38193
piR-31926	GXN_541625	piR-hsa-2108	77.6442	-0.71983	0.387682	-1.85675	0.0633464	0.38193
piR-52470	GXN_556370	piR-hsa-15669	15.9367	0.603713	0.32607	1.85149	0.0640997	0.385694
piR-36318	GXN_570364	piR-hsa-28467	821.254	-0.41926	0.226405	-1.85181	0.0640529	0.385694
piR-43598	GXN_545592	piR-hsa-5764	256.047	-0.507791	0.274546	-1.84957	0.0643757	0.386966
piR-40834	GXN_542642	piR-hsa-3046	28.6474	0.446734	0.242405	1.84292	0.0653403	0.386995
piR-41965	GXN_543825	piR-hsa-4130	13.4937	-0.574453	0.311777	-1.84251	0.0654002	0.386995
piR-42911	GXN_544914	piR-hsa-5134	12.8555	-0.714469	0.386834	-1.84696	0.0647524	0.386995
piR-43302	GXN_545287	piR-hsa-5482	180.346	0.425585	0.230732	1.8445	0.0651104	0.386995
piR-43326	GXN_545313	piR-hsa-5506	185.342	0.547549	0.296551	1.84639	0.0648357	0.386995
piR-43542	GXN_545531	piR-hsa-5708	7249.53	-0.392971	0.212894	-1.84585	0.0649135	0.386995
piR-44355	GXN_546405	piR-hsa-6506	64.2372	0.558996	0.303332	1.84285	0.065351	0.386995
piR-45067	GXN_547242	piR-hsa-7274	17.7075	-0.579644	0.313779	-1.8473	0.0647038	0.386995
piR-45125	GXN_547305	piR-hsa-7332	32.43	0.487575	0.26451	1.84332	0.0652827	0.386995
piR-46055	GXN_548260	piR-hsa-8202	29.788	-0.660866	0.35856	-1.84311	0.0653125	0.386995
piR-32135	GXN_552665	piR-hsa-12262	53.8401	0.70182	0.379877	1.84749	0.0646755	0.386995
piR-55152	GXN_559223	piR-hsa-18287	1513.67	-0.639848	0.34607	-1.8489	0.0644729	0.386995
piR-55450	GXN_559534	piR-hsa-18570	16.103	0.478447	0.259342	1.84485	0.065059	0.386995
piR-60229	GXN_565863	piR-hsa-24351	58.186	-0.616397	0.334355	-1.84354	0.0652499	0.386995
piR-34383	GXN_568250	piR-hsa-26533	160.675	0.452377	0.245455	1.84302	0.0653264	0.386995
piR-38369	GXN_572566	piR-hsa-30503	14.6055	-0.47136	0.255839	-1.84241	0.0654159	0.386995
piR-58001	GXN_562059	piR-hsa-20866	13.1702	0.389551	0.211589	1.84108	0.0656104	0.387763
piR-34588	GXN_568474	piR-hsa-26738	16.969	0.437709	0.237904	1.83985	0.0657896	0.388438
piR-51047	GXN_554745	piR-hsa-14172	14.1506	0.402345	0.218851	1.83844	0.0659976	0.38901
piR-33153	GXN_564735	piR-hsa-23319	12.9968	0.421863	0.229484	1.83831	0.0660165	0.38901
piR-30777	GXN_540351	piR-hsa-930	32.9888	-0.436208	0.237452	-1.83704	0.0662045	0.38935
piR-32930	GXN_553624	piR-hsa-13141	13.6348	0.465591	0.253439	1.83709	0.0661969	0.38935
piR-42803	GXN_544798	piR-hsa-5026	15.4128	-0.454613	0.247677	-1.83551	0.0664307	0.390297
piR-44928	GXN_547106	piR-hsa-7152	22.5225	0.484839	0.264208	1.83506	0.0664961	0.390297
piR-30037	GXN_539612	piR-hsa-249	117.143	0.386121	0.210827	1.83146	0.067032	0.390378
piR-41072	GXN_542886	piR-hsa-3268	16.8306	0.332848	0.181523	1.83364	0.0667075	0.390378
piR-41704	GXN_543557	piR-hsa-3885	16.0676	0.350624	0.191397	1.83192	0.0669635	0.390378
piR-43537	GXN_545525	piR-hsa-5703	17.5605	0.406766	0.221934	1.83282	0.0668286	0.390378
piR-32956	GXN_553652	piR-hsa-13167	17.4486	0.674382	0.367877	1.83318	0.0667765	0.390378
piR-51756	GXN_555612	piR-hsa-14969	51.9357	0.697818	0.380746	1.83276	0.0668377	0.390378
piR-51765	GXN_555622	piR-hsa-14978	33.755	0.563612	0.307609	1.83224	0.0669163	0.390378
piR-33528	GXN_565114	piR-hsa-23664	58.6706	0.417306	0.22785	1.83149	0.0670269	0.390378
piR-57806	GXN_562194	piR-hsa-20990	120.014	-0.625831	0.341825	-1.83085	0.0671228	0.390526
piR-39937	GXN_574308	piR-hsa-32094	24.5927	0.393459	0.215167	1.82862	0.0674566	0.392087
piR-30113	GXN_539695	piR-hsa-325	847.409	0.611895	0.3349	1.8271	0.067685	0.392271
piR-44456	GXN_544682	piR-hsa-4918	26.0578	-0.470757	0.257601	-1.82746	0.06763	0.392271
piR-56285	GXN_560516	piR-hsa-19455	67.3673	0.478448	0.261769	1.82775	0.0675868	0.392271
piR-39161	GXN_573531	piR-hsa-31380	57.3012	-0.366111	0.200664	-1.82449	0.0680775	0.394164
piR-46553	GXN_548787	piR-hsa-8682	19.0418	0.347476	0.190508	1.82394	0.0681611	0.394266
piR-40503	GXN_542188	piR-hsa-2627	36.3378	-0.665026	0.364728	-1.82335	0.0682503	0.394401
piR-39360	GXN_573732	piR-hsa-31564	17.816	-0.356644	0.195672	-1.82266	0.0683547	0.394623
piR-30519	GXN_540085	piR-hsa-687	64.1634	-0.445476	0.244616	-1.82112	0.0685882	0.394763
piR-41502	GXN_543338	piR-hsa-3683	37.8257	-0.397068	0.218196	-1.81977	0.0687933	0.394763
piR-46365	GXN_548583	piR-hsa-8497	17.3009	0.432977	0.237677	1.8217	0.0685001	0.394763
piR-59233	GXN_563702	piR-hsa-22369	80.7189	-0.527889	0.290135	-1.81946	0.0688409	0.394763
piR-34293	GXN_568152	piR-hsa-26443	159.47	-0.709859	0.389995	-1.82017	0.0687325	0.394763
piR-36889	GXN_570969	piR-hsa-29023	29.2773	-0.668318	0.367166	-1.82021	0.0687274	0.394763
piR-38819	GXN_573159	piR-hsa-31039	47.9793	-0.7025	0.385802	-1.82088	0.0686248	0.394763
piR-42418	GXN_544302	piR-hsa-4568	19.7669	-0.451492	0.248499	-1.81688	0.0692355	0.396645
piR-61968	GXN_567760	piR-hsa-26088	37.5976	-0.388702	0.214051	-1.81593	0.0693814	0.3971
piR-33336	GXN_564920	piR-hsa-23487	31.5725	0.633262	0.348977	1.81462	0.0695822	0.397869
piR-49295	GXN_551823	piR-hsa-11483	65.3525	0.493759	0.272283	1.8134	0.0697696	0.39856
piR-40176	GXN_541881	piR-hsa-2344	89.2037	0.41505	0.22896	1.81276	0.0698682	0.398742
piR-55876	GXN_560082	piR-hsa-19061	41.9537	-0.676152	0.373095	-1.81228	0.0699429	0.398788
piR-30292	GXN_539872	piR-hsa-489	14.2068	-0.630445	0.348237	-1.81039	0.0702348	0.399357
piR-41004	GXN_542811	piR-hsa-3200	107.524	-0.416365	0.229992	-1.81034	0.0702431	0.399357
piR-37513	GXN_571705	piR-hsa-29704	20.2503	0.422944	0.233532	1.81108	0.0701285	0.399357
piR-40922	GXN_542738	piR-hsa-3134	17.6385	0.383437	0.2123	1.8061	0.0709022	0.40044
piR-45190	GXN_547374	piR-hsa-7397	58.4996	-0.47593	0.263512	-1.8061	0.0709021	0.40044
piR-51347	GXN_555057	piR-hsa-14457	57.956	-0.59313	0.327936	-1.80868	0.0705014	0.40044
piR-52276	GXN_556162	piR-hsa-15475	38.1666	0.602825	0.333531	1.8074	0.0706997	0.40044
piR-54263	GXN_558299	piR-hsa-17442	39.528	-0.411823	0.22783	-1.80759	0.0706709	0.40044
piR-54874	GXN_558949	piR-hsa-18038	94.5075	-0.704246	0.389854	-1.80644	0.0708503	0.40044
piR-33380	GXN_564968	piR-hsa-23531	15.9972	0.506543	0.280427	1.80633	0.0708672	0.40044
piR-46238	GXN_548443	piR-hsa-8370	15.0736	-0.389548	0.215838	-1.80481	0.0711037	0.401199
piR-54183	GXN_558228	piR-hsa-17377	12.9825	-0.695006	0.385601	-1.8024	0.0714828	0.402588
piR-61426	GXN_567199	piR-hsa-25575	17.7315	0.513119	0.284688	1.80239	0.0714845	0.402588
piR-54261	GXN_558297	piR-hsa-17440	42.6024	-0.410513	0.227815	-1.80196	0.0715521	0.40259
piR-52845	GXN_556723	piR-hsa-15998	155.335	0.526403	0.292505	1.79964	0.0719175	0.404266
piR-60175	GXN_565805	piR-hsa-24297	1151.26	0.489178	0.272144	1.7975	0.0722566	0.40541
piR-37188	GXN_571402	piR-hsa-29422	13.2641	-0.413699	0.230142	-1.79758	0.072243	0.40541
piR-40660	GXN_542358	piR-hsa-2784	65.798	-0.535496	0.298092	-1.79641	0.0724288	0.405995
piR-36417	GXN_570472	piR-hsa-28566	28.2407	0.326137	0.181603	1.79588	0.0725142	0.406093
piR-42215	GXN_542499	piR-hsa-2914	37.9144	0.619708	0.345169	1.79537	0.0725942	0.406161
piR-33729	GXN_565333	piR-hsa-23865	170.745	0.608902	0.339475	1.79366	0.0728679	0.407311
piR-44504	GXN_546548	piR-hsa-6640	17.8834	-0.667651	0.372419	-1.79274	0.0730141	0.407382
piR-59178	GXN_563643	piR-hsa-22314	46.8923	0.565905	0.315742	1.7923	0.073085	0.407382
piR-39145	GXN_573514	piR-hsa-31364	20.9752	0.600083	0.334776	1.79249	0.073054	0.407382
piR-61995	GXN_567790	piR-hsa-26115	209.626	-0.354603	0.198109	-1.78993	0.0734648	0.409118
piR-52864	GXN_556743	piR-hsa-16017	43.8879	0.557596	0.311932	1.78756	0.0738473	0.41045
piR-53978	GXN_558005	piR-hsa-17172	38.8451	-0.616789	0.345065	-1.78746	0.0738632	0.41045
piR-33194	GXN_564780	piR-hsa-23360	54.4866	-0.560239	0.313479	-1.78716	0.0739108	0.41045
piR-61552	GXN_567322	piR-hsa-25687	28.512	0.364463	0.204068	1.78599	0.0741012	0.41045
piR-37892	GXN_572083	piR-hsa-30054	91.9749	-0.663853	0.371675	-1.78611	0.0740812	0.41045
piR-39493	GXN_573844	piR-hsa-31668	33.2205	-0.582755	0.326309	-1.7859	0.0741156	0.41045
piR-48475	GXN_549323	piR-hsa-9178	30.4637	0.55121	0.308978	1.78398	0.0744275	0.411795
piR-56164	GXN_560383	piR-hsa-19334	51.4982	-0.615418	0.345146	-1.78307	0.0745757	0.412234
piR-46867	GXN_549109	piR-hsa-8982	52.3855	0.565284	0.317363	1.78119	0.0748812	0.413366
piR-49404	GXN_551940	piR-hsa-11592	18.9355	0.446485	0.250699	1.78096	0.0749188	0.413366
piR-41330	GXN_543152	piR-hsa-3511	792.507	0.40455	0.227345	1.77945	0.0751663	0.41435
piR-42529	GXN_544392	piR-hsa-4650	76.3934	0.399533	0.224597	1.77889	0.0752585	0.414476
piR-43695	GXN_545698	piR-hsa-5861	159.587	0.675235	0.380058	1.77666	0.0756236	0.415104
piR-50054	GXN_553760	piR-hsa-13265	12.9778	0.377303	0.212537	1.77524	0.0758583	0.415104
piR-54395	GXN_558442	piR-hsa-17574	18.927	0.450038	0.253181	1.77753	0.0754808	0.415104
piR-55606	GXN_559801	piR-hsa-18806	107.602	-0.672109	0.378507	-1.77569	0.0757846	0.415104
piR-35707	GXN_569730	piR-hsa-27886	1116.2	0.623475	0.350964	1.77647	0.0756563	0.415104
piR-38583	GXN_572793	piR-hsa-30717	138.374	0.423128	0.238348	1.77525	0.0758567	0.415104
piR-39806	GXN_574165	piR-hsa-31964	19.7906	0.430207	0.242117	1.77686	0.0755917	0.415104
piR-40097	GXN_541794	piR-hsa-2265	166.441	0.544707	0.307142	1.77347	0.0761513	0.416164
piR-41589	GXN_543432	piR-hsa-3770	65.4048	-0.388067	0.218952	-1.77239	0.0763304	0.416164
piR-50843	GXN_554553	piR-hsa-13997	23.6121	0.506641	0.285754	1.773	0.0762289	0.416164
piR-33065	GXN_564639	piR-hsa-23231	410.479	0.42189	0.237991	1.77271	0.0762764	0.416164
piR-49157	GXN_551705	piR-hsa-11374	30.7629	-0.497681	0.281051	-1.77079	0.0765964	0.417234
piR-47435	GXN_549799	piR-hsa-9621	13.048	0.507572	0.287077	1.76807	0.0770488	0.419316
piR-40393	GXN_542085	piR-hsa-2532	16.1795	0.45253	0.256124	1.76683	0.0772559	0.419697
piR-38776	GXN_573112	piR-hsa-30996	33.908	0.335314	0.189785	1.76682	0.0772591	0.419697
piR-53223	GXN_557119	piR-hsa-16361	32.093	-0.62739	0.35581	-1.76327	0.0778541	0.422546
piR-42142	GXN_544019	piR-hsa-4307	109.234	-0.320524	0.181899	-1.7621	0.0780523	0.423237
piR-41406	GXN_543236	piR-hsa-3587	46.0616	0.433858	0.246511	1.75999	0.0784088	0.424017
piR-55886	GXN_560093	piR-hsa-19071	20.8734	-0.604731	0.343513	-1.76043	0.0783346	0.424017
piR-34303	GXN_568163	piR-hsa-26453	80.1528	-0.596468	0.338869	-1.76017	0.0783786	0.424017
piR-43655	GXN_545655	piR-hsa-5821	16.1226	-0.445328	0.253439	-1.75714	0.0788944	0.426258
piR-40339	GXN_542026	piR-hsa-2478	71.3763	0.559137	0.318321	1.75652	0.0789998	0.426442
piR-30502	GXN_540067	piR-hsa-670	16.301	-0.411697	0.234845	-1.75306	0.079592	0.427436
piR-41755	GXN_543597	piR-hsa-3922	12.7301	0.609839	0.347895	1.75294	0.0796127	0.427436
piR-41800	GXN_543646	piR-hsa-3967	73.019	0.340295	0.19402	1.75392	0.0794447	0.427436
piR-54194	GXN_558240	piR-hsa-17388	22.7033	0.308979	0.176251	1.75306	0.0795916	0.427436
piR-38010	GXN_572194	piR-hsa-30158	31.7419	0.274888	0.156715	1.75406	0.0794205	0.427436
piR-38058	GXN_572245	piR-hsa-30206	18.4611	-0.430507	0.245451	-1.75394	0.0794406	0.427436
piR-51920	GXN_555790	piR-hsa-15133	25.5938	-0.468577	0.267403	-1.75232	0.0797185	0.42762
piR-42458	GXN_542509	piR-hsa-2924	55.2141	-0.504239	0.288082	-1.75033	0.0800616	0.428596
piR-40756	GXN_542556	piR-hsa-2968	34.4809	0.617482	0.352732	1.75057	0.08002	0.428596
piR-46364	GXN_548582	piR-hsa-8496	324.964	-0.478155	0.273229	-1.75002	0.0801155	0.428596
piR-48252	GXN_550627	piR-hsa-10380	65.4638	-0.57994	0.331548	-1.74919	0.0802578	0.428974
piR-40063	GXN_541759	piR-hsa-2231	13.5662	0.415142	0.237477	1.74814	0.0804404	0.429566
piR-44721	GXN_546767	piR-hsa-6842	83.0425	-0.500705	0.28657	-1.74723	0.0805969	0.430018
piR-40760	GXN_542560	piR-hsa-2972	528.958	-0.315479	0.180628	-1.74657	0.0807115	0.430246
piR-45656	GXN_547839	piR-hsa-7818	18.9288	-0.563265	0.323067	-1.74349	0.0812477	0.432181
piR-60479	GXN_566137	piR-hsa-24601	118.988	-0.570185	0.327018	-1.74359	0.0812309	0.432181
piR-39456	GXN_573836	piR-hsa-31660	25.1352	-0.655229	0.375868	-1.74324	0.0812914	0.432181
piR-51923	GXN_555794	piR-hsa-15136	91.8828	0.518505	0.297799	1.74112	0.0816621	0.433767
piR-43691	GXN_545694	piR-hsa-5857	1149	0.540175	0.310447	1.73999	0.0818603	0.434434
piR-50228	GXN_553315	piR-hsa-12859	14.2205	0.355324	0.204312	1.73912	0.0820133	0.434475
piR-59247	GXN_562117	piR-hsa-20919	16.8866	-0.362146	0.208224	-1.73921	0.0819981	0.434475
piR-57135	GXN_561419	piR-hsa-20276	283.015	0.377626	0.217405	1.73697	0.0823921	0.436095
piR-57750	GXN_562038	piR-hsa-20847	33.4795	0.563635	0.324769	1.73549	0.0826533	0.437082
piR-39255	GXN_573619	piR-hsa-31459	39.2835	-0.546125	0.314753	-1.73509	0.0827248	0.437082
piR-42536	GXN_544400	piR-hsa-4657	2532.15	0.527723	0.304296	1.73424	0.0828757	0.437493
piR-53821	GXN_557834	piR-hsa-17015	256.109	0.591275	0.341265	1.7326	0.0831676	0.438647
piR-59283	GXN_563741	piR-hsa-22405	122.827	0.548449	0.316687	1.73184	0.0833029	0.438973
piR-52633	GXN_556529	piR-hsa-15817	40.8012	-0.424909	0.245488	-1.73088	0.0834739	0.439487
piR-50932	GXN_554651	piR-hsa-14086	16.7964	0.518611	0.299731	1.73025	0.0835853	0.439573
piR-61179	GXN_566963	piR-hsa-25357	15.8775	0.361855	0.209169	1.72996	0.0836372	0.439573
piR-31059	GXN_540639	piR-hsa-1198	36.1506	-0.456834	0.264491	-1.72722	0.0841278	0.441661
piR-42500	GXN_544360	piR-hsa-4621	45.2039	-0.304941	0.176581	-1.72692	0.0841822	0.441661
piR-44398	GXN_546451	piR-hsa-6549	15.0371	0.34372	0.199117	1.72623	0.0843068	0.441927
NA	GXN_446880	NA	644.524	-0.436583	0.253585	-1.72164	0.0851346	0.442277
piR-41562	GXN_543403	piR-hsa-3743	14.5779	-0.67091	0.389852	-1.72094	0.0852625	0.442277
piR-42447	GXN_544334	piR-hsa-4597	35.7452	-0.471381	0.27383	-1.72144	0.0851719	0.442277
piR-45166	GXN_547348	piR-hsa-7373	21.978	-0.404802	0.235045	-1.72223	0.0850272	0.442277
piR-47382	GXN_549742	piR-hsa-9568	23.9987	0.501604	0.291156	1.7228	0.0849247	0.442277
piR-47440	GXN_549804	piR-hsa-9626	145.35	0.671374	0.390058	1.72122	0.0852116	0.442277
piR-47913	GXN_550273	piR-hsa-10056	17.1917	0.47572	0.275718	1.72539	0.0844572	0.442277
piR-50040	GXN_553744	piR-hsa-13251	47.6719	-0.616319	0.357789	-1.72258	0.0849654	0.442277
piR-52227	GXN_556108	piR-hsa-15426	35.3755	0.332108	0.192676	1.72366	0.0847687	0.442277
piR-53607	GXN_557617	piR-hsa-16815	16.1817	-0.411972	0.239443	-1.72054	0.0853334	0.442277
piR-55905	GXN_560114	piR-hsa-19090	60.1744	0.334143	0.194208	1.72054	0.0853348	0.442277
piR-33187	GXN_564772	piR-hsa-23353	20.2279	-0.45377	0.263275	-1.72356	0.0847874	0.442277
piR-39766	GXN_574122	piR-hsa-31924	17.3525	0.472407	0.274504	1.72095	0.08526	0.442277
piR-36182	GXN_570217	piR-hsa-28331	24.6609	0.307377	0.178704	1.72004	0.0854252	0.442362
piR-61931	GXN_567720	piR-hsa-26051	51.4519	0.464352	0.270436	1.71705	0.08597	0.444798
piR-44601	GXN_546652	piR-hsa-6737	22.8616	0.531767	0.309921	1.71582	0.0861958	0.445581
piR-31447	GXN_540790	piR-hsa-1338	2780.84	-0.382451	0.223264	-1.713	0.0867123	0.446065
piR-31680	GXN_541390	piR-hsa-1891	115.304	-0.480696	0.280529	-1.71353	0.0866148	0.446065
piR-42764	GXN_544756	piR-hsa-4987	18.842	-0.490869	0.286412	-1.71386	0.0865549	0.446065
piR-47755	GXN_550099	piR-hsa-9898	14.2387	-0.539859	0.315189	-1.71281	0.0867477	0.446065
piR-32830	GXN_553517	piR-hsa-13041	23.9306	-0.389008	0.226958	-1.71401	0.0865266	0.446065
piR-55097	GXN_559162	piR-hsa-18232	81.5228	0.607719	0.35439	1.71483	0.0863765	0.446065
piR-57656	GXN_561935	piR-hsa-20753	451.768	-0.473914	0.276744	-1.71246	0.0868115	0.446065
piR-31104	GXN_540688	piR-hsa-1243	36.6429	0.410864	0.240086	1.71132	0.0870224	0.446765
piR-31843	GXN_541534	piR-hsa-2025	27.8239	0.633872	0.370589	1.71044	0.0871839	0.446827
piR-31844	GXN_541535	piR-hsa-2026	27.8239	0.633872	0.370589	1.71044	0.0871839	0.446827
piR-44505	GXN_546549	piR-hsa-6641	23.9591	-0.483664	0.282916	-1.70957	0.0873461	0.446892
piR-32374	GXN_552908	piR-hsa-12485	103.312	-0.45302	0.264943	-1.70988	0.0872888	0.446892
piR-56672	GXN_560926	piR-hsa-19828	19.2343	0.497998	0.291609	1.70776	0.0876813	0.448224
piR-41076	GXN_542890	piR-hsa-3272	12.6852	-0.435188	0.255859	-1.70089	0.0889632	0.451006
piR-42784	GXN_544777	piR-hsa-5007	122.011	-0.536269	0.315305	-1.70079	0.0889817	0.451006
piR-44025	GXN_546042	piR-hsa-6176	321.492	-0.528823	0.310998	-1.7004	0.089055	0.451006
piR-32471	GXN_553014	piR-hsa-12582	15.8471	0.450855	0.265042	1.70107	0.0889296	0.451006
piR-50875	GXN_554588	piR-hsa-14029	15.4899	0.353274	0.207437	1.70304	0.0885606	0.451006
piR-55985	GXN_560202	piR-hsa-19170	36.4973	0.35978	0.211416	1.70176	0.0888001	0.451006
piR-33415	GXN_565007	piR-hsa-23566	2393.21	0.506436	0.297704	1.70114	0.0889173	0.451006
piR-61785	GXN_567559	piR-hsa-25906	20.2566	-0.426158	0.250174	-1.70345	0.0884847	0.451006
piR-35330	GXN_569353	piR-hsa-27539	44.2573	-0.421163	0.247565	-1.70122	0.0889008	0.451006
piR-38552	GXN_572760	piR-hsa-30686	25.5446	0.476075	0.27954	1.70307	0.0885556	0.451006
piR-39109	GXN_573475	piR-hsa-31328	14.6204	-0.466762	0.273912	-1.70406	0.0883703	0.451006
piR-36344	GXN_570392	piR-hsa-28493	161.147	0.380783	0.224013	1.69983	0.0891638	0.451175
piR-41413	GXN_543244	piR-hsa-3594	32.2495	-0.637866	0.375443	-1.69897	0.0893248	0.451607
piR-52191	GXN_556072	piR-hsa-15390	77.7605	-0.465523	0.274142	-1.69811	0.0894875	0.451667
piR-39303	GXN_573670	piR-hsa-31507	32.9376	0.389567	0.229359	1.69851	0.0894124	0.451667
piR-54338	GXN_558380	piR-hsa-17517	21.4456	0.542543	0.319691	1.69709	0.08968	0.452256
piR-43165	GXN_545155	piR-hsa-5359	64.5003	0.46293	0.272921	1.69621	0.089847	0.452497
piR-50748	GXN_554448	piR-hsa-13902	21.8319	-0.505962	0.29832	-1.69604	0.089879	0.452497
piR-45029	GXN_547200	piR-hsa-7238	1059.51	0.459891	0.271347	1.69484	0.0901054	0.453245
piR-37923	GXN_572116	piR-hsa-30085	13.5197	-0.660794	0.389974	-1.69445	0.0901791	0.453245
piR-41466	GXN_543301	piR-hsa-3647	68.6231	-0.626172	0.369715	-1.69366	0.0903292	0.453558
piR-43806	GXN_545820	piR-hsa-5972	48.7572	0.646263	0.38172	1.69303	0.0904502	0.453558
piR-60054	GXN_565674	piR-hsa-24176	66.4948	-0.576713	0.34066	-1.69293	0.090469	0.453558
piR-61363	GXN_567131	piR-hsa-25512	300.56	-0.529771	0.313249	-1.69122	0.0907954	0.454471
piR-37161	GXN_571374	piR-hsa-29395	15.1483	0.311328	0.18409	1.69118	0.0908031	0.454471
piR-42468	GXN_542520	piR-hsa-2934	138.677	0.44381	0.262551	1.69038	0.0909562	0.454857
piR-39009	GXN_573367	piR-hsa-31229	27.0757	0.41093	0.243405	1.68826	0.0913623	0.456506
piR-37599	GXN_571798	piR-hsa-29790	20.3313	0.386729	0.229633	1.68411	0.0921597	0.460106
piR-31103	GXN_540687	piR-hsa-1242	1240.36	0.653104	0.38843	1.6814	0.0926858	0.460654
piR-41280	GXN_543097	piR-hsa-3461	27.302	-0.373937	0.222568	-1.6801	0.0929371	0.460654
piR-45673	GXN_547858	piR-hsa-7835	13.7774	-0.571738	0.339985	-1.68166	0.0926355	0.460654
piR-32675	GXN_553237	piR-hsa-12786	16.3824	0.341466	0.203239	1.68012	0.0929341	0.460654
piR-51949	GXN_555822	piR-hsa-15162	20.5856	-0.427042	0.25425	-1.67962	0.0930321	0.460654
piR-52437	GXN_556335	piR-hsa-15636	63.6615	0.522324	0.310659	1.68134	0.0926964	0.460654
piR-55021	GXN_559079	piR-hsa-18156	2501.85	0.611942	0.364343	1.67958	0.0930396	0.460654
piR-55030	GXN_559088	piR-hsa-18165	28.2686	0.423672	0.252157	1.68019	0.0929206	0.460654
piR-55770	GXN_559965	piR-hsa-18955	71.5555	-0.575684	0.342436	-1.68115	0.0927345	0.460654
piR-60429	GXN_566082	piR-hsa-24551	157.929	-0.596775	0.355128	-1.68045	0.0928698	0.460654
piR-42431	GXN_544317	piR-hsa-4581	42.9441	-0.454177	0.27051	-1.67897	0.093158	0.460846
piR-55497	GXN_557505	piR-hsa-16713	57.7375	0.498433	0.297006	1.67819	0.0933096	0.460846
piR-58202	GXN_562612	piR-hsa-21369	41.3408	0.653028	0.38908	1.67839	0.0932709	0.460846
piR-41409	GXN_543239	piR-hsa-3590	82.437	0.485067	0.289276	1.67683	0.0935755	0.460917
piR-41953	GXN_543812	piR-hsa-4118	35.9643	-0.64127	0.38274	-1.67547	0.0938416	0.460917
piR-42118	GXN_543992	piR-hsa-4283	21.5605	0.432137	0.257793	1.67629	0.0936813	0.460917
piR-42503	GXN_544364	piR-hsa-4624	42.8586	-0.425046	0.253374	-1.67754	0.0934367	0.460917
piR-47117	GXN_549472	piR-hsa-9317	14.9307	-0.59705	0.356452	-1.67498	0.0939385	0.460917
piR-32828	GXN_553515	piR-hsa-13039	23.3288	0.441417	0.263199	1.67713	0.0935178	0.460917
piR-35868	GXN_569891	piR-hsa-28032	26.4722	0.386963	0.231046	1.67483	0.0939671	0.460917
piR-38059	GXN_572246	piR-hsa-30207	17.865	-0.441816	0.263837	-1.67458	0.0940174	0.460917
piR-39629	GXN_573990	piR-hsa-31803	35.6984	-0.407523	0.243212	-1.67559	0.0938191	0.460917
piR-54607	GXN_558672	piR-hsa-17785	13.7386	0.501421	0.29962	1.67352	0.0942241	0.461552
piR-44442	GXN_546497	piR-hsa-6593	47.1815	0.307887	0.184031	1.67301	0.094325	0.461667
piR-43360	GXN_545350	piR-hsa-5540	22.8953	-0.479827	0.28721	-1.67065	0.0947913	0.462569
piR-48902	GXN_551324	piR-hsa-11016	13.5852	-0.453646	0.271535	-1.67067	0.0947869	0.462569
piR-32794	GXN_553478	piR-hsa-13005	20.2022	0.406353	0.243251	1.67051	0.0948185	0.462569
piR-61175	GXN_566959	piR-hsa-25353	23.446	0.5528	0.33078	1.6712	0.0946815	0.462569
piR-36326	GXN_570373	piR-hsa-28475	1100.2	-0.559877	0.335247	-1.67004	0.0949107	0.462641
piR-43921	GXN_545945	piR-hsa-6087	182.785	-0.581262	0.348253	-1.66908	0.0951011	0.463192
piR-31708	GXN_540820	piR-hsa-1366	263.399	-0.585799	0.351798	-1.66516	0.0958816	0.46323
piR-43963	GXN_544668	piR-hsa-4905	42.6844	-0.309732	0.185701	-1.66791	0.0953339	0.46323
piR-42783	GXN_544776	piR-hsa-5006	117.609	-0.53348	0.320223	-1.66596	0.0957206	0.46323
piR-45977	GXN_548174	piR-hsa-8124	63.7997	0.636904	0.382473	1.66522	0.095868	0.46323
piR-45989	GXN_548187	piR-hsa-8136	14.5448	0.402421	0.24135	1.66738	0.0954395	0.46323
piR-49552	GXN_552085	piR-hsa-11725	66.9637	0.552156	0.331591	1.66517	0.0958783	0.46323
piR-51724	GXN_555577	piR-hsa-14937	56.4319	0.352648	0.211543	1.66703	0.0955093	0.46323
piR-57956	GXN_562358	piR-hsa-21139	19.3818	-0.468956	0.28163	-1.66515	0.0958834	0.46323
piR-58484	GXN_562904	piR-hsa-21637	77.7385	-0.647622	0.388341	-1.66766	0.0953825	0.46323
piR-36383	GXN_570434	piR-hsa-28532	56.0193	0.364957	0.218825	1.66781	0.0953543	0.46323
piR-42822	GXN_544819	piR-hsa-5045	337.36	-0.54709	0.328638	-1.66472	0.0959689	0.463269
piR-42914	GXN_544917	piR-hsa-5137	13.1404	-0.428463	0.25776	-1.66226	0.0964607	0.465267
piR-48725	GXN_551131	piR-hsa-10839	13.2151	-0.417654	0.251695	-1.65936	0.0970428	0.467321
piR-49560	GXN_552093	piR-hsa-11733	167.186	0.516363	0.311123	1.65968	0.0969796	0.467321
piR-56304	GXN_560537	piR-hsa-19474	19.1001	-0.391998	0.236334	-1.65866	0.097185	0.467629
piR-32683	GXN_553245	piR-hsa-12794	95.5838	-0.520267	0.313851	-1.65769	0.0973803	0.467684
piR-39786	GXN_574144	piR-hsa-31944	14.5036	0.456879	0.275654	1.65744	0.097431	0.467684
piR-39809	GXN_574168	piR-hsa-31967	41.6634	0.369934	0.223098	1.65817	0.0972839	0.467684
piR-51668	GXN_555516	piR-hsa-14881	23.5886	-0.355439	0.214519	-1.65691	0.0975367	0.467817
piR-42685	GXN_544562	piR-hsa-4806	39.2924	0.448269	0.270768	1.65555	0.0978132	0.468648
piR-51225	GXN_554940	piR-hsa-14349	414.651	-0.644425	0.389314	-1.65528	0.0978667	0.468648
piR-43239	GXN_545219	piR-hsa-5419	27.8282	0.293679	0.177609	1.65352	0.0982258	0.469707
piR-45185	GXN_547369	piR-hsa-7392	15.0903	-0.390644	0.236264	-1.65342	0.0982449	0.469707
piR-44508	GXN_546552	piR-hsa-6644	14.7016	0.351462	0.212757	1.65194	0.0985468	0.470774
piR-49003	GXN_551544	piR-hsa-11220	18.0112	-0.374411	0.226783	-1.65096	0.098746	0.470973
piR-35510	GXN_569516	piR-hsa-27690	36814.6	0.598698	0.362597	1.65114	0.0987098	0.470973
piR-47571	GXN_549913	piR-hsa-9728	12.834	0.410408	0.248687	1.6503	0.0988821	0.471246
piR-41955	GXN_543814	piR-hsa-4120	26.684	-0.372587	0.225923	-1.64918	0.0991115	0.471963
piR-50212	GXN_553932	piR-hsa-13423	17.7566	-0.363372	0.220429	-1.64847	0.0992553	0.472272
piR-37286	GXN_571475	piR-hsa-29491	34.4857	-0.358307	0.217445	-1.64781	0.0993918	0.472545
piR-57840	GXN_562231	piR-hsa-21024	16.1531	0.356856	0.21665	1.64715	0.0995269	0.472812
piR-43918	GXN_545941	piR-hsa-6084	74.9888	0.557521	0.338774	1.6457	0.0998253	0.473103
piR-55639	GXN_559837	piR-hsa-18839	15.1305	0.432659	0.26287	1.6459	0.0997836	0.473103
piR-33631	GXN_565227	piR-hsa-23767	58.4845	-0.505796	0.307263	-1.64613	0.0997364	0.473103
piR-50881	GXN_554595	piR-hsa-14035	25.9526	-0.325128	0.197764	-1.64402	0.100173	0.474374
piR-31468	GXN_541161	piR-hsa-1679	15.6611	-0.58345	0.355312	-1.64208	0.100574	0.475497
piR-41458	GXN_543293	piR-hsa-3639	68.6172	-0.313343	0.190908	-1.64133	0.100728	0.475497
piR-32239	GXN_551512	piR-hsa-11191	25.5884	-0.456978	0.278266	-1.64224	0.100541	0.475497
piR-53887	GXN_557905	piR-hsa-17081	45.9977	-0.377068	0.229728	-1.64136	0.100722	0.475497
piR-49463	GXN_552003	piR-hsa-11651	69.8055	0.636439	0.387948	1.64053	0.100896	0.475913
piR-40844	GXN_542653	piR-hsa-3056	90.141	0.613901	0.37483	1.63781	0.101461	0.476324
piR-43538	GXN_545526	piR-hsa-5704	17.4762	0.357253	0.218087	1.63812	0.101396	0.476324
piR-49413	GXN_551949	piR-hsa-11601	42.0068	0.523376	0.319485	1.63818	0.101384	0.476324
piR-57939	GXN_562339	piR-hsa-21123	73.9453	0.439173	0.267988	1.63878	0.101259	0.476324
piR-35251	GXN_569266	piR-hsa-27460	21.6099	0.352017	0.214745	1.63923	0.101166	0.476324
piR-37061	GXN_571266	piR-hsa-29295	148.129	-0.355765	0.21716	-1.63826	0.101366	0.476324
piR-41255	GXN_543070	piR-hsa-3436	411.112	0.483049	0.295248	1.63608	0.101823	0.476556
piR-48154	GXN_550519	piR-hsa-10282	16.1373	-0.405224	0.247531	-1.63706	0.101617	0.476556
piR-61116	GXN_566894	piR-hsa-25294	34.9241	0.336141	0.205459	1.63605	0.101829	0.476556
piR-35224	GXN_568901	piR-hsa-27127	122.848	0.370381	0.226308	1.63662	0.101709	0.476556
piR-32764	GXN_553445	piR-hsa-12975	70.1482	-0.385778	0.235963	-1.63491	0.102068	0.4773
piR-42242	GXN_544110	piR-hsa-4392	13.7266	-0.352937	0.216171	-1.63267	0.102538	0.478375
piR-44523	GXN_546569	piR-hsa-6659	1067.39	0.574526	0.351826	1.63298	0.102472	0.478375
piR-34810	GXN_568702	piR-hsa-26946	629.041	-0.340693	0.208643	-1.63289	0.102491	0.478375
piR-49054	GXN_551597	piR-hsa-11271	52.0526	-0.335194	0.205436	-1.63162	0.102759	0.47878
piR-55164	GXN_559236	piR-hsa-18299	22.0689	-0.314113	0.19253	-1.6315	0.102784	0.47878
piR-42140	GXN_544016	piR-hsa-4305	17.9231	-0.332608	0.204113	-1.62953	0.103201	0.479068
piR-60763	GXN_566415	piR-hsa-24856	76.7788	0.377208	0.231427	1.62993	0.103117	0.479068
piR-60849	GXN_566618	piR-hsa-25043	84.6276	-0.260983	0.16018	-1.62931	0.103247	0.479068
piR-36527	GXN_570576	piR-hsa-28662	41.4095	0.469986	0.288204	1.63074	0.102945	0.479068
piR-38490	GXN_572695	piR-hsa-30624	25.4653	0.545771	0.334958	1.62937	0.103235	0.479068
piR-43379	GXN_545369	piR-hsa-5559	20.4312	0.293291	0.180393	1.62584	0.103983	0.479518
piR-47813	GXN_550163	piR-hsa-9956	15.0898	-0.576545	0.354337	-1.62711	0.103714	0.479518
piR-49027	GXN_551569	piR-hsa-11244	32.0676	0.369639	0.227369	1.62572	0.104009	0.479518
piR-49696	GXN_552238	piR-hsa-11868	580.311	0.479212	0.294495	1.62724	0.103687	0.479518
piR-55045	GXN_559105	piR-hsa-18180	19.7817	0.417285	0.256719	1.62546	0.104065	0.479518
piR-60170	GXN_565799	piR-hsa-24292	20.7285	-0.530759	0.325925	-1.62847	0.103426	0.479518
piR-35211	GXN_568887	piR-hsa-27114	27.8384	-0.446917	0.274807	-1.62629	0.103887	0.479518
piR-35335	GXN_569359	piR-hsa-27544	51.5348	0.33901	0.208416	1.6266	0.103822	0.479518
piR-35530	GXN_569538	piR-hsa-27710	14.8834	0.503067	0.309016	1.62796	0.103532	0.479518
piR-55936	GXN_560148	piR-hsa-19121	60.0092	0.576047	0.354531	1.62481	0.104202	0.479739
piR-60385	GXN_566035	piR-hsa-24507	22.6819	-0.36682	0.225808	-1.62448	0.104274	0.479739
piR-50137	GXN_553850	piR-hsa-13348	28.0098	-0.616114	0.379448	-1.62371	0.104438	0.479858
piR-55848	GXN_560051	piR-hsa-19033	30.2098	-0.263849	0.162508	-1.62361	0.10446	0.479858
piR-48159	GXN_550524	piR-hsa-10287	212.962	0.564251	0.347655	1.62302	0.104585	0.480064
piR-33820	GXN_565433	piR-hsa-23956	1239.49	-0.632227	0.389786	-1.62199	0.104806	0.48071
piR-48184	GXN_550552	piR-hsa-10312	17.1483	-0.43818	0.270446	-1.62021	0.105187	0.482087
piR-30451	GXN_540012	piR-hsa-619	841.76	0.424927	0.263367	1.61344	0.106649	0.482598
piR-30728	GXN_540298	piR-hsa-881	17.4741	-0.307709	0.19063	-1.61417	0.10649	0.482598
piR-31555	GXN_541257	piR-hsa-1766	19.1304	0.620069	0.383083	1.61863	0.105527	0.482598
piR-40227	GXN_541904	piR-hsa-2366	15.3266	-0.319902	0.198368	-1.61267	0.106817	0.482598
piR-41990	GXN_543852	piR-hsa-4155	33.1012	0.490629	0.30337	1.61726	0.105822	0.482598
piR-42119	GXN_543993	piR-hsa-4284	56.8989	-0.409557	0.254032	-1.61223	0.106912	0.482598
piR-44865	GXN_547037	piR-hsa-7089	14.1481	-0.553349	0.342065	-1.61767	0.105733	0.482598
piR-48799	GXN_551212	piR-hsa-10913	55.7221	0.538878	0.333853	1.61412	0.106502	0.482598
piR-48805	GXN_551219	piR-hsa-10919	12.8839	0.479247	0.29698	1.61373	0.106585	0.482598
piR-32061	GXN_552588	piR-hsa-12188	799.834	0.588524	0.364577	1.61427	0.10647	0.482598
piR-50387	GXN_554103	piR-hsa-13584	20.5818	-0.512949	0.317389	-1.61615	0.106061	0.482598
piR-50848	GXN_554558	piR-hsa-14002	19.5977	0.394243	0.244482	1.61256	0.106839	0.482598
piR-51514	GXN_555350	piR-hsa-14727	25.092	0.366177	0.226288	1.61819	0.105622	0.482598
piR-51639	GXN_555485	piR-hsa-14852	55.136	-0.529536	0.327768	-1.61558	0.106184	0.482598
piR-54092	GXN_558129	piR-hsa-17286	21.6367	0.408472	0.253055	1.61416	0.106492	0.482598
piR-58341	GXN_562748	piR-hsa-21494	20.5767	0.442632	0.273961	1.61567	0.106165	0.482598
piR-59804	GXN_564385	piR-hsa-22999	181.714	0.413301	0.256226	1.61304	0.106737	0.482598
piR-33369	GXN_564956	piR-hsa-23520	14.7083	0.428719	0.265231	1.6164	0.106008	0.482598
piR-61999	GXN_567794	piR-hsa-26119	17.0233	0.435508	0.269588	1.61546	0.106211	0.482598
piR-38357	GXN_572553	piR-hsa-30491	18.5044	-0.306813	0.189556	-1.61859	0.105536	0.482598
piR-40849	GXN_542658	piR-hsa-3061	16.2972	-0.335268	0.208087	-1.61119	0.107137	0.48263
piR-44468	GXN_544695	piR-hsa-4930	118.851	0.265252	0.164793	1.6096	0.107484	0.48263
piR-43877	GXN_545898	piR-hsa-6043	14.0047	0.464773	0.288649	1.61017	0.107362	0.48263
piR-58355	GXN_562763	piR-hsa-21508	333.467	-0.383218	0.238043	-1.60986	0.107427	0.48263
piR-33818	GXN_565431	piR-hsa-23954	13.5312	-0.627749	0.389593	-1.61129	0.107116	0.48263
piR-61486	GXN_567265	piR-hsa-25635	13.927	0.34186	0.212309	1.6102	0.107354	0.48263
piR-35096	GXN_569113	piR-hsa-27320	17.8848	0.514667	0.319732	1.60968	0.107467	0.48263
piR-31109	GXN_540693	piR-hsa-1248	51.7604	0.331349	0.205997	1.60851	0.107723	0.482794
piR-52917	GXN_556801	piR-hsa-16070	22.6286	0.346139	0.215127	1.609	0.107617	0.482794
piR-39001	GXN_573358	piR-hsa-31221	106.285	0.48222	0.299827	1.60833	0.107763	0.482794
piR-59730	GXN_564194	piR-hsa-22823	115.964	0.379712	0.236413	1.60614	0.108243	0.484256
piR-36513	GXN_570560	piR-hsa-28648	19.0409	-0.457224	0.284679	-1.6061	0.108251	0.484256
piR-41151	GXN_542973	piR-hsa-3347	15.4627	-0.387725	0.241484	-1.6056	0.108362	0.484391
piR-30278	GXN_539857	piR-hsa-475	26.9569	0.452963	0.282372	1.60414	0.108684	0.485153
piR-60333	GXN_565978	piR-hsa-24455	13.2531	-0.474584	0.295861	-1.60408	0.108697	0.485153
piR-36587	GXN_570641	piR-hsa-28722	33.4967	-0.608226	0.37926	-1.60372	0.108776	0.485153
piR-60719	GXN_566383	piR-hsa-24826	15.3848	-0.319288	0.199142	-1.60332	0.108864	0.485182
piR-45979	GXN_548176	piR-hsa-8126	21.9181	-0.331449	0.207025	-1.60101	0.109374	0.486369
piR-48772	GXN_551183	piR-hsa-10886	120.794	0.303609	0.189613	1.6012	0.109333	0.486369
piR-34623	GXN_568512	piR-hsa-26773	14.4946	-0.362886	0.226596	-1.60146	0.109274	0.486369
piR-45127	GXN_547307	piR-hsa-7334	17.408	-0.454129	0.283885	-1.5997	0.109666	0.487306
piR-51709	GXN_555560	piR-hsa-14922	33.1064	0.496206	0.310369	1.59876	0.109873	0.487642
piR-36120	GXN_570149	piR-hsa-28269	14.8386	-0.403291	0.252332	-1.59825	0.109987	0.487642
piR-38317	GXN_572510	piR-hsa-30451	60.9343	-0.365498	0.228638	-1.59859	0.109913	0.487642
piR-43063	GXN_545046	piR-hsa-5257	50.1434	0.25266	0.158289	1.59619	0.110446	0.488312
piR-43929	GXN_545953	piR-hsa-6095	149.944	-0.534502	0.334722	-1.59686	0.110298	0.488312
piR-32349	GXN_552880	piR-hsa-12460	15.0758	0.371727	0.232896	1.59611	0.110464	0.488312
piR-50618	GXN_554322	piR-hsa-13786	27.3166	0.370295	0.23193	1.59658	0.11036	0.488312
piR-44414	GXN_546468	piR-hsa-6565	14.2531	-0.326889	0.204927	-1.59514	0.11068	0.488503
piR-49638	GXN_552178	piR-hsa-11810	25.679	-0.421424	0.264245	-1.59482	0.110752	0.488503
piR-52097	GXN_555968	piR-hsa-15296	14.432	0.36864	0.23105	1.59549	0.110602	0.488503
piR-60867	GXN_566638	piR-hsa-25061	17.1894	-0.421058	0.264428	-1.59233	0.11131	0.4906
piR-43340	GXN_545328	piR-hsa-5520	21.875	0.314953	0.197975	1.59087	0.111638	0.491685
piR-40121	GXN_541821	piR-hsa-2289	34.8805	0.423897	0.266835	1.58861	0.112149	0.492484
piR-42219	GXN_544086	piR-hsa-4369	24.1136	-0.326665	0.205626	-1.58863	0.112143	0.492484
piR-44108	GXN_546133	piR-hsa-6259	411.426	0.369034	0.232267	1.58884	0.112097	0.492484
piR-32032	GXN_552556	piR-hsa-12159	52.0249	0.619688	0.389837	1.58961	0.111923	0.492484
piR-57125	GXN_561408	piR-hsa-20266	65534.3	0.370709	0.233437	1.58804	0.112276	0.492681
piR-42090	GXN_543961	piR-hsa-4255	19.8471	0.525142	0.330981	1.58663	0.112597	0.493366
piR-36771	GXN_570839	piR-hsa-28905	128.424	0.386715	0.24369	1.58692	0.112532	0.493366
piR-40624	GXN_542319	piR-hsa-2748	16.6822	-0.315059	0.198694	-1.58565	0.11282	0.493775
piR-35911	GXN_569938	piR-hsa-28075	17.3308	-0.476195	0.300346	-1.58549	0.112856	0.493775
piR-44802	GXN_546968	piR-hsa-7026	14.1293	0.336112	0.212236	1.58367	0.113268	0.494233
piR-46032	GXN_548235	piR-hsa-8179	21.0839	0.309219	0.195267	1.58357	0.113291	0.494233
piR-50011	GXN_552533	piR-hsa-12138	23.3157	0.375738	0.23718	1.58419	0.113151	0.494233
piR-61039	GXN_566810	piR-hsa-25218	240.818	-0.39133	0.247109	-1.58364	0.113276	0.494233
piR-40434	GXN_542128	piR-hsa-2573	25.3882	-0.3416	0.215767	-1.58319	0.113378	0.494253
piR-31068	GXN_540649	piR-hsa-1207	225.946	0.426175	0.26961	1.58071	0.113945	0.495274
piR-41667	GXN_543517	piR-hsa-3848	64.733	0.46466	0.294202	1.5794	0.114245	0.495274
piR-43499	GXN_545483	piR-hsa-5665	22.1995	-0.421042	0.266591	-1.57936	0.114254	0.495274
piR-43946	GXN_545972	piR-hsa-6112	14.8642	-0.38461	0.243393	-1.5802	0.114061	0.495274
piR-50286	GXN_553994	piR-hsa-13483	22.0159	-0.429666	0.271849	-1.58053	0.113985	0.495274
piR-53084	GXN_556966	piR-hsa-16222	67.0718	0.292505	0.18524	1.57906	0.114321	0.495274
piR-36608	GXN_570664	piR-hsa-28743	34.4867	0.513024	0.324924	1.57891	0.114358	0.495274
piR-37918	GXN_572111	piR-hsa-30080	84.5161	0.504709	0.31934	1.58048	0.113998	0.495274
piR-39746	GXN_574100	piR-hsa-31904	19.9266	0.360084	0.227981	1.57945	0.114233	0.495274
piR-30274	GXN_539853	piR-hsa-471	14.8716	0.336284	0.213194	1.57736	0.114712	0.495451
piR-45498	GXN_547665	piR-hsa-7661	39.1386	0.390019	0.247475	1.57599	0.115028	0.495451
piR-57801	GXN_562189	piR-hsa-20985	91.4327	-0.440884	0.279415	-1.57788	0.114592	0.495451
piR-59803	GXN_564384	piR-hsa-22998	117.961	-0.526353	0.333802	-1.57684	0.114832	0.495451
piR-60052	GXN_565672	piR-hsa-24174	14.043	0.431918	0.273749	1.57779	0.114614	0.495451
piR-60227	GXN_565861	piR-hsa-24349	77.8692	-0.379857	0.240978	-1.57632	0.114953	0.495451
piR-34699	GXN_568596	piR-hsa-26849	21.327	0.404802	0.256755	1.57661	0.114885	0.495451
piR-39736	GXN_574089	piR-hsa-31894	46.2444	0.34784	0.220732	1.57585	0.115061	0.495451
piR-41217	GXN_542457	piR-hsa-2876	30.9414	-0.562315	0.357159	-1.57441	0.115393	0.495684
piR-45440	GXN_547617	piR-hsa-7618	669.048	0.406651	0.258196	1.57497	0.115263	0.495684
piR-52092	GXN_555963	piR-hsa-15291	25.8221	0.377791	0.239993	1.57418	0.115447	0.495684
piR-37896	GXN_572088	piR-hsa-30058	20.2467	0.386169	0.245227	1.57474	0.115317	0.495684
piR-53630	GXN_557642	piR-hsa-16838	67.0888	0.485645	0.308634	1.57353	0.115596	0.495888
piR-58592	GXN_563022	piR-hsa-21744	25.0743	0.589236	0.374534	1.57325	0.11566	0.495888
piR-48721	GXN_551127	piR-hsa-10835	19.0448	0.429524	0.273189	1.57226	0.11589	0.496163
piR-35945	GXN_569975	piR-hsa-28109	13.9093	0.353382	0.224717	1.57256	0.11582	0.496163
piR-52324	GXN_556213	piR-hsa-15523	26.318	-0.373285	0.237575	-1.57123	0.116129	0.49683
piR-41279	GXN_543096	piR-hsa-3460	23.752	0.380071	0.242136	1.56966	0.116495	0.497685
piR-60689	GXN_566350	piR-hsa-24796	15.3804	0.313767	0.199876	1.56981	0.116459	0.497685
piR-51253	GXN_554954	piR-hsa-14363	649.696	-0.286636	0.182659	-1.56924	0.116593	0.497747
piR-30871	GXN_540455	piR-hsa-1024	19.1814	-0.434354	0.276942	-1.56839	0.116789	0.498228
piR-41258	GXN_543073	piR-hsa-3439	44.707	-0.574809	0.366618	-1.56787	0.116912	0.498396
piR-39900	GXN_574267	piR-hsa-32058	19.5926	-0.365202	0.232997	-1.56741	0.117019	0.498499
piR-30453	GXN_540014	piR-hsa-621	16.7776	-0.35759	0.22852	-1.56481	0.117628	0.498688
piR-43976	GXN_545989	piR-hsa-6127	17.1994	0.29878	0.190758	1.56628	0.117283	0.498688
piR-45357	GXN_547526	piR-hsa-7535	13.0826	-0.374023	0.23907	-1.56449	0.117702	0.498688
piR-46528	GXN_548760	piR-hsa-8657	39.9334	0.502326	0.320912	1.56531	0.117511	0.498688
piR-32450	GXN_552990	piR-hsa-12561	25.7151	-0.443245	0.283159	-1.56536	0.117499	0.498688
piR-52475	GXN_555240	piR-hsa-14625	17.5542	0.421271	0.269291	1.56437	0.117731	0.498688
piR-37200	GXN_571415	piR-hsa-29434	22.4257	0.384153	0.2453	1.56605	0.117337	0.498688
piR-38455	GXN_572658	piR-hsa-30589	16.876	-0.395222	0.252418	-1.56574	0.117409	0.498688
piR-42412	GXN_544296	piR-hsa-4562	67.4929	-0.479463	0.306691	-1.56334	0.117972	0.499273
piR-32105	GXN_552633	piR-hsa-12232	17.3704	-0.462192	0.295695	-1.56307	0.118036	0.499273
piR-61258	GXN_566446	piR-hsa-24886	34.1589	0.401466	0.257075	1.56167	0.118366	0.500316
piR-36130	GXN_570160	piR-hsa-28279	79.3683	0.382827	0.245203	1.56127	0.11846	0.50036
piR-47395	GXN_549756	piR-hsa-9581	57.5667	-0.587668	0.376741	-1.55987	0.11879	0.501233
piR-35699	GXN_569721	piR-hsa-27878	94.283	0.365038	0.234046	1.55969	0.118834	0.501233
piR-42773	GXN_544766	piR-hsa-4996	26.2855	0.598853	0.384146	1.55892	0.119015	0.501641
piR-34804	GXN_568695	piR-hsa-26940	276.917	-0.307652	0.197561	-1.55726	0.11941	0.502597
piR-36365	GXN_570416	piR-hsa-28514	21.911	-0.43279	0.277866	-1.55755	0.119339	0.502597
piR-42078	GXN_543948	piR-hsa-4243	12.7066	-0.378816	0.243581	-1.55519	0.1199	0.503952
piR-45315	GXN_547480	piR-hsa-7493	28.7361	0.326855	0.210131	1.55548	0.119831	0.503952
piR-30729	GXN_540299	piR-hsa-882	16.6704	0.470313	0.302548	1.5545	0.120064	0.504287
piR-46140	GXN_548353	piR-hsa-8287	12.815	-0.457325	0.294503	-1.55287	0.120454	0.505569
piR-58255	GXN_562082	piR-hsa-20887	25.5267	-0.439314	0.283076	-1.55193	0.12068	0.506161
piR-48373	GXN_550760	piR-hsa-10501	99.3504	-0.405448	0.261408	-1.55102	0.120897	0.506494
piR-32819	GXN_553505	piR-hsa-13030	115.887	0.388072	0.250226	1.55089	0.120929	0.506494
piR-53396	GXN_557276	piR-hsa-16505	21.3782	0.32865	0.211964	1.5505	0.121021	0.506526
piR-40749	GXN_542548	piR-hsa-2961	22.7396	-0.504408	0.325473	-1.54977	0.121197	0.506555
piR-41001	GXN_542808	piR-hsa-3197	13.1815	-0.44696	0.288346	-1.55008	0.121121	0.506555
piR-30399	GXN_539986	piR-hsa-596	56.346	0.271199	0.175343	1.54668	0.121942	0.508245
piR-52410	GXN_556305	piR-hsa-15609	205.15	0.376304	0.243293	1.54671	0.121933	0.508245
piR-56783	GXN_561048	piR-hsa-19939	18.671	-0.440968	0.284922	-1.54768	0.1217	0.508245
piR-58067	GXN_562463	piR-hsa-21234	20.665	0.305711	0.197641	1.5468	0.12191	0.508245
piR-42304	GXN_544178	piR-hsa-4454	37.1591	-0.343476	0.222436	-1.54416	0.122549	0.509358
piR-50808	GXN_554514	piR-hsa-13962	90.9714	0.600224	0.38854	1.54482	0.12239	0.509358
piR-33733	GXN_565338	piR-hsa-23869	107.925	0.294563	0.190731	1.5444	0.122492	0.509358
piR-34149	GXN_568010	piR-hsa-26315	22.3512	0.597031	0.386584	1.54438	0.122497	0.509358
piR-32937	GXN_553632	piR-hsa-13148	48.4095	0.481298	0.311766	1.54378	0.122642	0.509389
piR-32534	GXN_553082	piR-hsa-12645	937.489	0.502311	0.32546	1.54339	0.122736	0.509428
piR-30957	GXN_540531	piR-hsa-1096	97.4226	0.484342	0.31397	1.54264	0.122919	0.509832
piR-46208	GXN_548427	piR-hsa-8355	57.4788	-0.598937	0.388482	-1.54173	0.123138	0.510388
piR-57014	GXN_561286	piR-hsa-20155	41.4514	0.352558	0.22879	1.54097	0.123325	0.510538
piR-35408	GXN_569438	piR-hsa-27617	2348.45	0.542889	0.352323	1.54088	0.123345	0.510538
piR-45046	GXN_547219	piR-hsa-7255	51.3308	-0.533198	0.346258	-1.53989	0.123588	0.510844
piR-47340	GXN_549698	piR-hsa-9526	147.493	0.559664	0.363481	1.53974	0.123625	0.510844
piR-50725	GXN_554439	piR-hsa-13893	17.0367	0.402216	0.261318	1.53918	0.123761	0.510844
piR-54394	GXN_558441	piR-hsa-17573	43.8667	-0.351229	0.228166	-1.53936	0.123718	0.510844
piR-57018	GXN_561290	piR-hsa-20159	46.5815	0.416869	0.270973	1.53841	0.123948	0.511263
piR-42365	GXN_544244	piR-hsa-4515	25.6136	-0.420225	0.273268	-1.53778	0.124103	0.51155
piR-41532	GXN_543370	piR-hsa-3713	17.5393	-0.498663	0.324505	-1.53669	0.12437	0.511727
piR-47138	GXN_549494	piR-hsa-9338	51.7559	0.313751	0.204191	1.53655	0.124402	0.511727
piR-37140	GXN_571351	piR-hsa-29374	22.4631	0.415861	0.270644	1.53656	0.124401	0.511727
piR-44440	GXN_546495	piR-hsa-6591	19.1881	0.552257	0.359717	1.53526	0.124721	0.51198
piR-53489	GXN_557378	piR-hsa-16598	279.537	0.466685	0.303878	1.53576	0.124597	0.51198
piR-38814	GXN_573153	piR-hsa-31034	12.8713	0.539851	0.351586	1.53547	0.124668	0.51198
piR-30134	GXN_539717	piR-hsa-346	12.8334	0.335509	0.218719	1.53397	0.125037	0.51207
piR-43923	GXN_545947	piR-hsa-6089	70.693	-0.418861	0.273192	-1.53321	0.125225	0.51207
piR-43939	GXN_545964	piR-hsa-6105	118.959	0.272686	0.177896	1.53284	0.125317	0.51207
piR-46550	GXN_548783	piR-hsa-8679	17.9142	0.549107	0.358096	1.53341	0.125176	0.51207
piR-51644	GXN_555491	piR-hsa-14857	51.137	-0.375264	0.244889	-1.53238	0.125428	0.51207
piR-57259	GXN_559683	piR-hsa-18702	351.019	-0.396182	0.258154	-1.53467	0.124865	0.51207
piR-60548	GXN_566197	piR-hsa-24655	17.4398	-0.317506	0.20715	-1.53274	0.12534	0.51207
piR-37431	GXN_571632	piR-hsa-29636	98.7811	-0.435901	0.284427	-1.53256	0.125385	0.51207
piR-42710	GXN_544588	piR-hsa-4831	36.1865	0.446947	0.292092	1.53016	0.125978	0.51284
piR-48448	GXN_550842	piR-hsa-10576	43.299	0.330833	0.216178	1.53038	0.125923	0.51284
piR-48553	GXN_550942	piR-hsa-10667	16.5987	0.355223	0.232042	1.53086	0.125805	0.51284
piR-51690	GXN_555540	piR-hsa-14903	135.855	0.444694	0.290803	1.52919	0.126216	0.51284
piR-33437	GXN_565030	piR-hsa-23588	560.937	-0.439757	0.287529	-1.52944	0.126156	0.51284
piR-36722	GXN_570787	piR-hsa-28856	12.8242	0.321151	0.209973	1.52949	0.126144	0.51284
piR-37605	GXN_571805	piR-hsa-29796	16.7908	-0.531875	0.347414	-1.53096	0.125781	0.51284
piR-31966	GXN_541653	piR-hsa-2134	14.1212	0.296666	0.194101	1.52841	0.12641	0.513001
piR-43401	GXN_545394	piR-hsa-5581	47.0007	-0.504594	0.330258	-1.52788	0.126543	0.513001
piR-50638	GXN_554344	piR-hsa-13806	47.1003	-0.36314	0.237712	-1.52765	0.126599	0.513001
piR-38169	GXN_572365	piR-hsa-30317	17.0462	-0.445833	0.291815	-1.52779	0.126564	0.513001
piR-44371	GXN_546422	piR-hsa-6522	289.743	0.40632	0.266139	1.52672	0.126831	0.513246
piR-53875	GXN_557893	piR-hsa-17069	43.53	-0.264632	0.173318	-1.52686	0.126796	0.513246
piR-45858	GXN_548044	piR-hsa-8005	51.8567	-0.447966	0.293948	-1.52397	0.127517	0.514729
piR-32955	GXN_553651	piR-hsa-13166	12.8451	0.318209	0.208816	1.52387	0.127542	0.514729
piR-52207	GXN_556088	piR-hsa-15406	288.313	0.239129	0.156876	1.52432	0.127428	0.514729
piR-34758	GXN_568645	piR-hsa-26894	50.04	0.439424	0.288285	1.52427	0.127442	0.514729
piR-30117	GXN_539699	piR-hsa-329	17.9231	-0.406996	0.267142	-1.52352	0.127629	0.514733
piR-40087	GXN_541783	piR-hsa-2255	37.5461	0.514511	0.337948	1.52246	0.127894	0.515116
piR-42877	GXN_544876	piR-hsa-5100	50.1198	-0.2878	0.189038	-1.52245	0.127896	0.515116
piR-40236	GXN_541914	piR-hsa-2375	251.963	0.542314	0.356379	1.52173	0.128076	0.515157
piR-43223	GXN_544639	piR-hsa-4878	25.7936	0.563288	0.370487	1.5204	0.128411	0.515157
piR-45537	GXN_547708	piR-hsa-7700	66.2239	-0.313072	0.205921	-1.52035	0.128423	0.515157
piR-51542	GXN_555380	piR-hsa-14755	1441.11	0.423039	0.27822	1.52052	0.12838	0.515157
piR-52436	GXN_556334	piR-hsa-15635	37.9538	0.4095	0.269175	1.52131	0.128181	0.515157
piR-36035	GXN_570057	piR-hsa-28184	46.4733	-0.427398	0.281037	-1.52079	0.128312	0.515157
piR-59227	GXN_563695	piR-hsa-22363	14.8336	0.454462	0.299084	1.51951	0.128633	0.515653
piR-43958	GXN_545985	piR-hsa-6124	14.5108	-0.31635	0.208259	-1.51902	0.128758	0.51581
piR-42550	GXN_544415	piR-hsa-4671	15.0947	-0.288528	0.190339	-1.51586	0.129554	0.518302
piR-35283	GXN_569301	piR-hsa-27492	223.454	0.326608	0.215424	1.51612	0.129488	0.518302
piR-52610	GXN_556503	piR-hsa-15794	13.0333	0.377943	0.249408	1.51536	0.129681	0.518463
piR-43583	GXN_545576	piR-hsa-5749	26.6819	0.446782	0.29497	1.51467	0.129856	0.51847
piR-55215	GXN_559292	piR-hsa-18350	64.5316	-0.547133	0.361217	-1.51469	0.12985	0.51847
piR-44997	GXN_547165	piR-hsa-7206	20.3962	0.277046	0.183013	1.5138	0.130076	0.519
piR-49238	GXN_551436	piR-hsa-11120	26.7915	-0.378821	0.250302	-1.51346	0.130164	0.519007
piR-51762	GXN_555619	piR-hsa-14975	68.6439	-0.563791	0.372915	-1.51185	0.130572	0.51994
piR-52042	GXN_555908	piR-hsa-15241	13.5536	0.290573	0.192182	1.51197	0.130541	0.51994
piR-41874	GXN_543728	piR-hsa-4041	28.7176	0.538865	0.356562	1.51128	0.130717	0.520173
piR-38605	GXN_572817	piR-hsa-30739	88.9451	0.235698	0.156007	1.51082	0.130835	0.520295
piR-32858	GXN_553548	piR-hsa-13069	77.3169	0.472545	0.31288	1.51031	0.130965	0.520465
piR-31252	GXN_540943	piR-hsa-1477	18.0142	0.420235	0.278467	1.5091	0.131273	0.520478
piR-42327	GXN_544203	piR-hsa-4477	21.5472	-0.461049	0.305523	-1.50905	0.131286	0.520478
piR-43421	GXN_545416	piR-hsa-5601	15.3685	-0.554632	0.368136	-1.5066	0.131914	0.520478
piR-44821	GXN_546989	piR-hsa-7045	159.242	0.502162	0.333477	1.50583	0.13211	0.520478
piR-46944	GXN_549193	piR-hsa-9059	167.18	0.324413	0.214984	1.50901	0.131296	0.520478
piR-47698	GXN_550052	piR-hsa-9855	3107.87	-0.583623	0.387641	-1.50558	0.132176	0.520478
piR-57086	GXN_561365	piR-hsa-20227	109.883	-0.411163	0.273126	-1.5054	0.132223	0.520478
piR-58114	GXN_562515	piR-hsa-21281	14.3516	-0.400233	0.265646	-1.50664	0.131903	0.520478
piR-59999	GXN_564233	piR-hsa-22859	12.7362	0.397273	0.263544	1.50743	0.131701	0.520478
piR-33864	GXN_565482	piR-hsa-24000	281.122	0.399104	0.265151	1.5052	0.132273	0.520478
piR-34438	GXN_568310	piR-hsa-26588	25.1102	0.284277	0.18844	1.50858	0.131407	0.520478
piR-35358	GXN_569384	piR-hsa-27567	28.2179	0.388696	0.258213	1.50533	0.132238	0.520478
piR-36981	GXN_571179	piR-hsa-29215	23.9435	-0.3237	0.214565	-1.50863	0.131393	0.520478
piR-37806	GXN_571992	piR-hsa-29968	19.3149	-0.489974	0.325231	-1.50654	0.131929	0.520478
piR-39455	GXN_573835	piR-hsa-31659	212.692	0.28545	0.189617	1.5054	0.132221	0.520478
piR-53412	GXN_557294	piR-hsa-16521	243.674	-0.442549	0.294147	-1.50452	0.132448	0.52048
piR-61950	GXN_567740	piR-hsa-26070	15.2031	0.382447	0.254159	1.50476	0.132387	0.52048
piR-43907	GXN_545929	piR-hsa-6073	42.8169	0.303579	0.201941	1.50331	0.132759	0.521361
piR-31474	GXN_541168	piR-hsa-1685	22.5487	0.345923	0.230356	1.50169	0.133177	0.522317
piR-58479	GXN_562898	piR-hsa-21632	539.432	0.528902	0.35218	1.50179	0.133151	0.522317
piR-49192	GXN_551743	piR-hsa-11409	18.4842	0.355706	0.23697	1.50106	0.13334	0.522613
piR-52497	GXN_556383	piR-hsa-15681	20.0427	0.311538	0.207738	1.49967	0.1337	0.522655
piR-57308	GXN_561573	piR-hsa-20420	46.1258	0.264228	0.17616	1.49993	0.133632	0.522655
piR-38540	GXN_572748	piR-hsa-30674	204.186	-0.366742	0.244549	-1.49967	0.1337	0.522655
piR-38716	GXN_572936	piR-hsa-30850	68.6691	0.415475	0.276932	1.50028	0.133542	0.522655
piR-40245	GXN_541924	piR-hsa-2384	105.583	-0.408253	0.27236	-1.49895	0.133887	0.522701
piR-35524	GXN_569531	piR-hsa-27704	1650.35	0.442511	0.295204	1.499	0.133873	0.522701
piR-57302	GXN_561567	piR-hsa-20414	98.6359	0.446579	0.29812	1.49798	0.134137	0.523337
piR-49813	GXN_552334	piR-hsa-11955	53.04	-0.414472	0.276777	-1.4975	0.134264	0.523489
piR-41547	GXN_543386	piR-hsa-3728	60.8118	-0.581146	0.388209	-1.49699	0.134395	0.523658
piR-31616	GXN_541323	piR-hsa-1827	12.7801	-0.341505	0.228427	-1.49503	0.134906	0.524968
piR-34073	GXN_567926	piR-hsa-26239	27.2282	-0.511956	0.34237	-1.49533	0.134829	0.524968
piR-31187	GXN_539521	piR-hsa-233	19.2468	-0.530375	0.355124	-1.49349	0.135309	0.5254
piR-30582	GXN_540154	piR-hsa-750	58.7699	-0.222797	0.14924	-1.49287	0.13547	0.5254
piR-42829	GXN_544826	piR-hsa-5052	88.8433	0.349241	0.23373	1.49421	0.135122	0.5254
piR-48832	GXN_551249	piR-hsa-10946	18.1876	-0.271291	0.1818	-1.49225	0.135633	0.5254
piR-34415	GXN_568286	piR-hsa-26565	1405.13	-0.29603	0.198362	-1.49237	0.135602	0.5254
piR-35002	GXN_569009	piR-hsa-27226	24.9987	0.367547	0.246164	1.4931	0.135412	0.5254
piR-37545	GXN_571740	piR-hsa-29736	14.7691	0.452375	0.302903	1.49347	0.135315	0.5254
piR-32197	GXN_552731	piR-hsa-12323	125.168	0.388322	0.260509	1.49063	0.13606	0.526714
piR-58126	GXN_562528	piR-hsa-21293	60.3929	-0.45175	0.303474	-1.4886	0.136594	0.528291
piR-33045	GXN_564617	piR-hsa-23211	1061.04	0.439414	0.295233	1.48836	0.136656	0.528291
piR-33107	GXN_564685	piR-hsa-23273	1413.21	0.510194	0.342856	1.48807	0.136732	0.528291
piR-48759	GXN_551168	piR-hsa-10873	461.716	0.421076	0.283183	1.48694	0.137031	0.528538
piR-54596	GXN_558660	piR-hsa-17774	90.723	-0.569435	0.382837	-1.48741	0.136907	0.528538
piR-33404	GXN_564995	piR-hsa-23555	380.504	0.325532	0.218944	1.48682	0.137061	0.528538
piR-46307	GXN_548519	piR-hsa-8439	19.944	-0.325317	0.218901	-1.48614	0.137243	0.528897
piR-40586	GXN_542277	piR-hsa-2710	65.2893	0.45428	0.305853	1.48529	0.137467	0.528931
piR-58791	GXN_563224	piR-hsa-21928	42.391	-0.560941	0.377712	-1.4851	0.137517	0.528931
piR-39478	GXN_572990	piR-hsa-30900	13.8001	0.34659	0.233318	1.48548	0.137415	0.528931
piR-30705	GXN_540273	piR-hsa-858	152.096	0.344341	0.232122	1.48344	0.137956	0.529204
piR-44167	GXN_546198	piR-hsa-6318	26.6272	0.315478	0.212616	1.48379	0.137864	0.529204
piR-45123	GXN_547303	piR-hsa-7330	129.947	0.387334	0.26104	1.48381	0.137859	0.529204
piR-32801	GXN_553486	piR-hsa-13012	47.8679	0.410991	0.277104	1.48317	0.13803	0.529204
piR-54803	GXN_558871	piR-hsa-17967	15.1164	-0.327326	0.220686	-1.48322	0.138015	0.529204
piR-42698	GXN_544576	piR-hsa-4819	12.974	0.351395	0.23727	1.48099	0.138609	0.530168
piR-49648	GXN_552189	piR-hsa-11820	25.6887	0.411345	0.277769	1.48089	0.138636	0.530168
piR-57898	GXN_562295	piR-hsa-21082	691.465	0.454538	0.306879	1.48116	0.138563	0.530168
piR-35003	GXN_569010	piR-hsa-27227	15.1228	0.371839	0.250974	1.48158	0.138452	0.530168
piR-58343	GXN_562750	piR-hsa-21496	32.1174	0.382347	0.258467	1.47929	0.139063	0.531462
piR-60043	GXN_565662	piR-hsa-24165	17.3203	-0.378588	0.256044	-1.4786	0.139246	0.531821
piR-31464	GXN_541157	piR-hsa-1675	13.3812	0.575831	0.38979	1.47729	0.139599	0.532829
piR-58167	GXN_562573	piR-hsa-21334	13.3082	0.36284	0.245802	1.47615	0.139904	0.53365
piR-54381	GXN_19668	piR-hsa-17560	699.169	-0.311158	0.211095	-1.47402	0.140476	0.534809
piR-45573	GXN_547748	piR-hsa-7736	112.382	0.400476	0.271662	1.47417	0.140436	0.534809
piR-48687	GXN_551089	piR-hsa-10801	13.3178	-0.361769	0.24533	-1.47462	0.140314	0.534809
piR-49823	GXN_552345	piR-hsa-11965	25.439	-0.482183	0.327311	-1.47317	0.140706	0.535347
piR-52404	GXN_556299	piR-hsa-15603	20.7214	0.383325	0.260289	1.47269	0.140834	0.535481
piR-52897	GXN_556779	piR-hsa-16050	15.7292	-0.505985	0.343653	-1.47237	0.140921	0.535481
piR-57266	GXN_561527	piR-hsa-20378	220.758	0.424562	0.288582	1.4712	0.141237	0.536341
piR-51959	GXN_555833	piR-hsa-15172	26.5153	0.329637	0.224276	1.46978	0.141621	0.537457
piR-38821	GXN_573161	piR-hsa-31041	13.4161	0.340727	0.231999	1.46866	0.141925	0.538271
piR-55218	GXN_559295	piR-hsa-18353	25.9117	0.369279	0.251537	1.46809	0.14208	0.538413
piR-36787	GXN_570857	piR-hsa-28921	13.484	-0.419817	0.286006	-1.46786	0.142142	0.538413
piR-40628	GXN_542323	piR-hsa-2752	27.5888	-0.482112	0.32856	-1.46735	0.142282	0.538535
piR-51389	GXN_555103	piR-hsa-14499	132.393	0.395294	0.269521	1.46665	0.14247	0.538535
piR-52471	GXN_556371	piR-hsa-15670	51.3188	0.244023	0.166334	1.46706	0.142359	0.538535
piR-60570	GXN_566221	piR-hsa-24677	14.4127	0.400593	0.273178	1.46642	0.142535	0.538535
piR-31399	GXN_541102	piR-hsa-1624	18.299	0.376521	0.257609	1.4616	0.143852	0.53976
piR-42641	GXN_544514	piR-hsa-4762	66.8967	-0.350684	0.239729	-1.46284	0.143512	0.53976
piR-45204	GXN_547390	piR-hsa-7411	18.1693	0.411892	0.281646	1.46244	0.14362	0.53976
piR-46305	GXN_548517	piR-hsa-8437	66.7729	-0.524671	0.358282	-1.46441	0.143083	0.53976
piR-48337	GXN_550720	piR-hsa-10465	21.175	-0.47396	0.323941	-1.46311	0.143438	0.53976
piR-51701	GXN_555552	piR-hsa-14914	53.465	-0.536043	0.36671	-1.46177	0.143806	0.53976
piR-52076	GXN_555945	piR-hsa-15275	16.1574	-0.326298	0.22308	-1.46269	0.143551	0.53976
piR-58669	GXN_563106	piR-hsa-21821	17.4812	0.567595	0.388103	1.46249	0.143608	0.53976
piR-34257	GXN_568113	piR-hsa-26407	64.9595	0.454195	0.310366	1.46342	0.143354	0.53976
piR-36235	GXN_570274	piR-hsa-28384	19.4962	0.460791	0.315196	1.46192	0.143763	0.53976
piR-39027	GXN_573386	piR-hsa-31247	44.8173	0.45215	0.308811	1.46417	0.143148	0.53976
piR-41375	GXN_543202	piR-hsa-3556	28.0802	-0.510522	0.349705	-1.45986	0.144328	0.540411
piR-43845	GXN_545863	piR-hsa-6011	15.9029	-0.328291	0.224845	-1.46008	0.144268	0.540411
piR-43875	GXN_545896	piR-hsa-6041	29.3538	0.369685	0.25355	1.45804	0.14483	0.540411
piR-48487	GXN_550869	piR-hsa-10601	34.8315	-0.371602	0.254622	-1.45943	0.144447	0.540411
piR-49329	GXN_551860	piR-hsa-11517	110.009	-0.422069	0.289485	-1.458	0.14484	0.540411
piR-32069	GXN_552596	piR-hsa-12196	14.618	-0.300499	0.206237	-1.45706	0.145101	0.540411
piR-50688	GXN_554398	piR-hsa-13856	28.3954	-0.466283	0.319783	-1.45812	0.144807	0.540411
piR-53513	GXN_557515	piR-hsa-16721	63.4514	0.456036	0.312598	1.45886	0.144604	0.540411
piR-57109	GXN_561390	piR-hsa-20250	16.6746	-0.28812	0.197746	-1.45702	0.14511	0.540411
piR-59547	GXN_563998	piR-hsa-22640	15.9413	-0.456296	0.313128	-1.45722	0.145055	0.540411
piR-33412	GXN_565004	piR-hsa-23563	21.6291	-0.56335	0.386421	-1.45787	0.144877	0.540411
piR-37297	GXN_571487	piR-hsa-29502	14.3136	-0.410323	0.281549	-1.45738	0.145013	0.540411
piR-52380	GXN_556273	piR-hsa-15579	14.1173	0.375711	0.257956	1.45649	0.145257	0.540623
piR-43948	GXN_545974	piR-hsa-6114	16.5898	0.435245	0.298965	1.45584	0.145437	0.540957
piR-59426	GXN_563898	piR-hsa-22548	25.7519	0.316621	0.217553	1.45537	0.145566	0.541053
piR-34475	GXN_568350	piR-hsa-26625	18.0357	-0.478333	0.328731	-1.45509	0.145644	0.541053
piR-41408	GXN_543238	piR-hsa-3589	652.282	0.530514	0.365258	1.45244	0.14638	0.542442
piR-41658	GXN_543507	piR-hsa-3839	256.875	0.431421	0.296972	1.45274	0.146297	0.542442
piR-46902	GXN_549148	piR-hsa-9017	55.349	-0.40047	0.275642	-1.45287	0.146261	0.542442
piR-35688	GXN_569709	piR-hsa-27867	446.826	0.507853	0.349519	1.45301	0.146222	0.542442
piR-61389	GXN_567159	piR-hsa-25538	44.8805	-0.454755	0.313237	-1.45179	0.146559	0.542768
piR-40967	GXN_542438	piR-hsa-2858	20.5935	0.308659	0.213075	1.4486	0.14745	0.544888
piR-51891	GXN_555759	piR-hsa-15104	81.3377	0.387338	0.267475	1.44813	0.147581	0.544888
piR-60899	GXN_566673	piR-hsa-25093	13.5187	0.304666	0.210389	1.44811	0.147587	0.544888
piR-61565	GXN_567336	piR-hsa-25700	26.6663	0.355005	0.245107	1.44837	0.147514	0.544888
piR-36323	GXN_570369	piR-hsa-28472	15.8693	-0.374275	0.258249	-1.44928	0.14726	0.544888
piR-41055	GXN_542867	piR-hsa-3251	22.6102	-0.534087	0.369094	-1.44702	0.147891	0.545055
piR-42742	GXN_544732	piR-hsa-4965	17.5259	-0.427369	0.295341	-1.44703	0.147887	0.545055
piR-60573	GXN_566224	piR-hsa-24680	408.483	0.440606	0.304503	1.44697	0.147906	0.545055
piR-56387	GXN_560628	piR-hsa-19557	17.0362	0.488104	0.337586	1.44586	0.148215	0.54586
piR-44451	GXN_546507	piR-hsa-6602	37.7157	0.267964	0.185516	1.44443	0.148619	0.546239
piR-49401	GXN_551937	piR-hsa-11589	54.4912	-0.296162	0.204959	-1.44498	0.148463	0.546239
piR-54170	GXN_558213	piR-hsa-17364	135.116	-0.490876	0.339765	-1.44475	0.148527	0.546239
piR-58634	GXN_563068	piR-hsa-21786	13.331	-0.401267	0.27791	-1.44387	0.148775	0.546239
piR-33489	GXN_565087	piR-hsa-23640	52.8537	0.328417	0.227453	1.44389	0.148769	0.546239
piR-42371	GXN_544251	piR-hsa-4521	45.7408	-0.499707	0.346468	-1.44229	0.149222	0.546392
piR-45394	GXN_547567	piR-hsa-7572	382.505	0.414701	0.287631	1.44178	0.149365	0.546392
piR-52250	GXN_556133	piR-hsa-15449	16.9226	-0.39778	0.27577	-1.44243	0.14918	0.546392
piR-56815	GXN_561083	piR-hsa-19971	70.0235	0.268007	0.185818	1.4423	0.149217	0.546392
piR-33469	GXN_565065	piR-hsa-23620	20.811	0.274394	0.190287	1.442	0.149302	0.546392
piR-37213	GXN_571068	piR-hsa-29114	17.6961	-0.308842	0.214118	-1.44239	0.149192	0.546392
piR-31245	GXN_540935	piR-hsa-1470	72.1617	0.405035	0.281267	1.44004	0.149857	0.54652
piR-46378	GXN_548597	piR-hsa-8510	15.9588	-0.361238	0.25067	-1.44109	0.149559	0.54652
piR-49024	GXN_551566	piR-hsa-11241	17.7786	-0.302156	0.209796	-1.44024	0.1498	0.54652
piR-54145	GXN_558187	piR-hsa-17339	88.2233	0.438633	0.304437	1.4408	0.14964	0.54652
piR-58244	GXN_562657	piR-hsa-21411	358.336	0.316094	0.219467	1.44028	0.149788	0.54652
piR-40666	GXN_542365	piR-hsa-2790	74.9772	0.346145	0.240504	1.43925	0.15008	0.547001
piR-58055	GXN_562450	piR-hsa-21222	63.0557	-0.527781	0.366834	-1.43875	0.150222	0.547186
piR-49348	GXN_551879	piR-hsa-11536	169.238	-0.45473	0.31631	-1.43761	0.150545	0.548027
piR-49356	GXN_551888	piR-hsa-11544	12.9522	-0.422006	0.293696	-1.43688	0.150752	0.548114
piR-50111	GXN_553823	piR-hsa-13322	56.2736	-0.370215	0.25762	-1.43706	0.150701	0.548114
piR-42231	GXN_544098	piR-hsa-4381	33.1344	-0.265049	0.184599	-1.43581	0.151057	0.548224
piR-57389	GXN_561661	piR-hsa-20501	52.3042	-0.474224	0.330152	-1.43638	0.150893	0.548224
piR-59038	GXN_563490	piR-hsa-22174	17.873	-0.273735	0.190616	-1.43605	0.150987	0.548224
piR-42234	GXN_544101	piR-hsa-4384	37.9468	-0.467123	0.32629	-1.43162	0.152253	0.548571
piR-45783	GXN_547963	piR-hsa-7930	14.0602	0.315587	0.220367	1.4321	0.152116	0.548571
piR-47641	GXN_549990	piR-hsa-9798	45.4522	0.275584	0.192381	1.43249	0.152003	0.548571
piR-48327	GXN_550709	piR-hsa-10455	98.7522	-0.557427	0.389196	-1.43225	0.152072	0.548571
piR-48576	GXN_550967	piR-hsa-10690	15.897	0.276457	0.19295	1.43279	0.151917	0.548571
piR-51797	GXN_555657	piR-hsa-15010	12.7972	-0.431329	0.300894	-1.43349	0.151718	0.548571
piR-54144	GXN_558186	piR-hsa-17338	13.5351	-0.392085	0.273588	-1.43312	0.151823	0.548571
piR-54785	GXN_558851	piR-hsa-17949	13.1346	0.302284	0.211132	1.43173	0.152221	0.548571
piR-55012	GXN_559069	piR-hsa-18147	13.3928	-0.52521	0.366325	-1.43373	0.15165	0.548571
piR-58155	GXN_562560	piR-hsa-21322	13.5656	-0.347863	0.242466	-1.43469	0.151376	0.548571
piR-38740	GXN_573073	piR-hsa-30962	58.2979	-0.468944	0.327081	-1.43372	0.151651	0.548571
piR-39860	GXN_574224	piR-hsa-32018	19.5648	0.394293	0.275149	1.43302	0.151853	0.548571
piR-60314	GXN_565957	piR-hsa-24436	122.235	-0.364421	0.254684	-1.43087	0.152467	0.549009
piR-31106	GXN_540690	piR-hsa-1245	264.533	-0.464674	0.324852	-1.43042	0.152598	0.54915
piR-42254	GXN_544123	piR-hsa-4404	54.5435	0.457946	0.320262	1.42991	0.152743	0.549343
piR-45265	GXN_547425	piR-hsa-7443	13.8537	-0.335437	0.234936	-1.42778	0.153354	0.55067
piR-32408	GXN_552944	piR-hsa-12519	19.6535	0.40592	0.284325	1.42766	0.153388	0.55067
piR-57132	GXN_561416	piR-hsa-20273	59.2432	0.306341	0.214527	1.42798	0.153297	0.55067
piR-31935	GXN_541635	piR-hsa-2117	99.2341	0.459141	0.322047	1.4257	0.153956	0.55102
piR-50575	GXN_554277	piR-hsa-13743	19.0286	0.23821	0.167044	1.42603	0.15386	0.55102
piR-52459	GXN_556358	piR-hsa-15658	30.1869	-0.295805	0.207522	-1.42541	0.154039	0.55102
piR-53660	GXN_557675	piR-hsa-16868	165.502	-0.276753	0.193996	-1.42659	0.153699	0.55102
piR-56369	GXN_560608	piR-hsa-19539	24.903	-0.345132	0.242021	-1.42604	0.153857	0.55102
piR-59293	GXN_563752	piR-hsa-22415	212.728	0.317628	0.222648	1.42659	0.153697	0.55102
piR-30778	GXN_540352	piR-hsa-931	18.3368	-0.405126	0.284776	-1.42261	0.154849	0.551328
piR-44198	GXN_546232	piR-hsa-6349	25.6341	0.258431	0.181577	1.42326	0.154662	0.551328
piR-45148	GXN_547329	piR-hsa-7355	27.3916	-0.351312	0.247208	-1.42112	0.155282	0.551328
piR-46186	GXN_548403	piR-hsa-8333	20.1589	-0.402719	0.283386	-1.42109	0.15529	0.551328
piR-47722	GXN_550079	piR-hsa-9879	19.5009	-0.321804	0.225916	-1.42444	0.15432	0.551328
piR-52016	GXN_555879	piR-hsa-15215	897.13	0.265316	0.186661	1.42138	0.155206	0.551328
piR-52130	GXN_556004	piR-hsa-15329	33.583	0.424978	0.298776	1.4224	0.154912	0.551328
piR-53820	GXN_557833	piR-hsa-17014	35.2461	0.509603	0.357894	1.42389	0.154477	0.551328
piR-57016	GXN_561288	piR-hsa-20157	98.0851	0.474385	0.333423	1.42277	0.154802	0.551328
piR-57322	GXN_561588	piR-hsa-20434	28.6829	0.412119	0.289392	1.42409	0.154421	0.551328
piR-61743	GXN_567529	piR-hsa-25878	58.0646	-0.319203	0.224212	-1.42367	0.154542	0.551328
piR-35809	GXN_569826	piR-hsa-27973	16.0477	0.450046	0.316716	1.42098	0.155323	0.551328
piR-38617	GXN_572829	piR-hsa-30751	22.7536	0.456485	0.321084	1.4217	0.155113	0.551328
piR-56119	GXN_560333	piR-hsa-19289	71.5215	-0.437038	0.307907	-1.41939	0.155787	0.552646
piR-48712	GXN_551117	piR-hsa-10826	63.7971	0.441425	0.31109	1.41896	0.15591	0.552755
piR-46591	GXN_548828	piR-hsa-8720	18.3874	-0.546579	0.385635	-1.41735	0.156381	0.554096
piR-48889	GXN_551309	piR-hsa-11003	9863.04	0.385127	0.272037	1.41572	0.156859	0.554802
piR-34473	GXN_568347	piR-hsa-26623	40.492	0.552108	0.389857	1.41618	0.156723	0.554802
piR-37182	GXN_571396	piR-hsa-29416	116.108	0.467075	0.329879	1.4159	0.156805	0.554802
piR-48777	GXN_551188	piR-hsa-10891	81.0767	-0.333396	0.235564	-1.41531	0.156978	0.554896
piR-50602	GXN_554305	piR-hsa-13770	1158.47	0.367816	0.260095	1.41416	0.157315	0.55576
piR-52709	GXN_556610	piR-hsa-15892	16.969	-0.362365	0.256339	-1.41362	0.157475	0.555995
piR-54004	GXN_558032	piR-hsa-17198	18.0397	0.311211	0.220281	1.41279	0.157716	0.55652
piR-31589	GXN_541294	piR-hsa-1800	1131.39	-0.271104	0.192259	-1.4101	0.158511	0.558337
piR-60449	GXN_566104	piR-hsa-24571	20.4815	-0.414841	0.294164	-1.41024	0.15847	0.558337
piR-39905	GXN_574273	piR-hsa-32063	14.8309	-0.283628	0.201087	-1.41047	0.158401	0.558337
piR-44555	GXN_546601	piR-hsa-6691	37.9242	-0.352591	0.250141	-1.40957	0.158666	0.558554
piR-30604	GXN_540178	piR-hsa-772	31.1483	0.24731	0.175942	1.40563	0.159833	0.559606
piR-31915	GXN_541613	piR-hsa-2097	94.1854	0.413532	0.294739	1.40304	0.160603	0.559606
piR-44735	GXN_546894	piR-hsa-6959	111.415	0.37985	0.269774	1.40803	0.159123	0.559606
piR-48771	GXN_551182	piR-hsa-10885	16.6349	0.340782	0.242739	1.40391	0.160347	0.559606
piR-32712	GXN_553276	piR-hsa-12823	134.559	-0.280439	0.199571	-1.40521	0.15996	0.559606
piR-51238	GXN_553402	piR-hsa-12937	18.2612	0.249932	0.178128	1.4031	0.160586	0.559606
piR-50456	GXN_554178	piR-hsa-13653	13.8874	-0.496108	0.353135	-1.40487	0.160061	0.559606
piR-51903	GXN_555772	piR-hsa-15116	26.5664	-0.301625	0.214292	-1.40755	0.159266	0.559606
piR-53088	GXN_556970	piR-hsa-16226	288.899	0.483261	0.343916	1.40517	0.15997	0.559606
piR-55029	GXN_559087	piR-hsa-18164	30.6789	-0.511405	0.364419	-1.40334	0.160514	0.559606
piR-57897	GXN_562294	piR-hsa-21081	35.2956	-0.433076	0.307764	-1.40717	0.159377	0.559606
piR-57975	GXN_562379	piR-hsa-21158	89.3187	0.326296	0.232589	1.40289	0.160649	0.559606
piR-33724	GXN_565328	piR-hsa-23860	36.6015	0.457815	0.326102	1.4039	0.160349	0.559606
piR-33878	GXN_565497	piR-hsa-24014	13.3294	0.397894	0.283567	1.40317	0.160566	0.559606
piR-61511	GXN_566469	piR-hsa-24906	51.5959	0.385372	0.273798	1.40751	0.159277	0.559606
piR-60904	GXN_566679	piR-hsa-25098	220.076	0.500945	0.356285	1.40602	0.159717	0.559606
piR-36159	GXN_570192	piR-hsa-28308	21.8435	0.267327	0.190191	1.40557	0.159853	0.559606
piR-37611	GXN_571811	piR-hsa-29802	40.312	0.311177	0.221678	1.40373	0.160399	0.559606
piR-42920	GXN_544923	piR-hsa-5143	13.0951	0.499142	0.35634	1.40075	0.161289	0.560387
piR-45885	GXN_548074	piR-hsa-8032	40.7648	0.460512	0.328618	1.40136	0.161107	0.560387
piR-33099	GXN_564676	piR-hsa-23265	30.3197	0.239634	0.170956	1.40173	0.160997	0.560387
piR-35779	GXN_569793	piR-hsa-27943	20.4189	-0.26232	0.187295	-1.40057	0.161342	0.560387
piR-37944	GXN_572138	piR-hsa-30106	21.3389	-0.4058	0.28969	-1.40081	0.161271	0.560387
piR-45459	GXN_547638	piR-hsa-7637	159.269	0.30163	0.215596	1.39905	0.161798	0.560946
piR-47599	GXN_549943	piR-hsa-9756	26.5139	0.316883	0.226542	1.39878	0.161878	0.560946
piR-56083	GXN_560294	piR-hsa-19253	32.2366	-0.388918	0.277958	-1.3992	0.161754	0.560946
piR-39842	GXN_574204	piR-hsa-32000	21.5943	-0.445218	0.318272	-1.39886	0.161854	0.560946
piR-61778	GXN_567551	piR-hsa-25899	45.6592	0.273256	0.195486	1.39783	0.162165	0.561613
piR-43093	GXN_545079	piR-hsa-5287	41.2645	0.49122	0.351614	1.39704	0.162401	0.56178
piR-44653	GXN_546708	piR-hsa-6789	14.7053	0.281269	0.201308	1.3972	0.162352	0.56178
piR-37463	GXN_571666	piR-hsa-29668	27.3836	-0.313924	0.224824	-1.39631	0.162622	0.56222
piR-42373	GXN_544253	piR-hsa-4523	31.4362	-0.371477	0.266176	-1.3956	0.162834	0.562629
piR-49451	GXN_551990	piR-hsa-11639	40.4542	0.369324	0.26483	1.39457	0.163147	0.563058
piR-37211	GXN_571066	piR-hsa-29112	13.1472	0.523764	0.375565	1.3946	0.163135	0.563058
piR-41827	GXN_543676	piR-hsa-3994	15.7231	0.279125	0.200286	1.39363	0.163429	0.563708
piR-34698	GXN_568595	piR-hsa-26848	2823.02	-0.421084	0.302485	-1.39208	0.163898	0.564998
piR-53380	GXN_557258	piR-hsa-16489	30.094	0.539741	0.387913	1.3914	0.164105	0.565386
piR-37204	GXN_571058	piR-hsa-29105	79.4127	-0.346525	0.249198	-1.39056	0.164359	0.56561
piR-38755	GXN_573089	piR-hsa-30977	15.5345	0.291674	0.209723	1.39075	0.1643	0.56561
piR-30088	GXN_539668	piR-hsa-300	99.682	-0.413833	0.298167	-1.38792	0.165161	0.565635
piR-42297	GXN_544170	piR-hsa-4447	13.5074	0.395609	0.285	1.38811	0.165105	0.565635
piR-44097	GXN_546121	piR-hsa-6248	149.438	0.294129	0.211931	1.38786	0.165181	0.565635
piR-45738	GXN_547913	piR-hsa-7885	16.0303	-0.326033	0.234609	-1.38969	0.164625	0.565635
piR-32776	GXN_553458	piR-hsa-12987	51.7518	-0.315224	0.227045	-1.38838	0.165022	0.565635
piR-57141	GXN_561426	piR-hsa-20282	98.5664	0.26525	0.191139	1.38774	0.165217	0.565635
piR-34191	GXN_568056	piR-hsa-26356	20.9083	-0.295646	0.212683	-1.39008	0.164505	0.565635
piR-35177	GXN_569201	piR-hsa-27401	28.5777	-0.233848	0.168406	-1.3886	0.164954	0.565635
piR-36942	GXN_571027	piR-hsa-29076	38.0486	0.510331	0.367582	1.38835	0.165032	0.565635
piR-32571	GXN_553123	piR-hsa-12682	440.297	0.400438	0.288653	1.38727	0.16536	0.565801
piR-32148	GXN_552679	piR-hsa-12275	383.015	0.293686	0.211773	1.38679	0.165505	0.565971
piR-40775	GXN_542577	piR-hsa-2987	94.267	-0.49362	0.356602	-1.38423	0.166287	0.566173
piR-32988	GXN_553687	piR-hsa-13199	12.958	0.292032	0.210981	1.38416	0.166308	0.566173
piR-52702	GXN_556603	piR-hsa-15885	31.1214	-0.392633	0.283578	-1.38457	0.166184	0.566173
piR-53123	GXN_557009	piR-hsa-16261	14.5241	0.412751	0.298225	1.38403	0.166351	0.566173
piR-58062	GXN_562458	piR-hsa-21229	20.2603	-0.244668	0.17663	-1.3852	0.16599	0.566173
piR-33081	GXN_564657	piR-hsa-23247	1617.74	0.366301	0.264466	1.38506	0.166035	0.566173
piR-60368	GXN_566016	piR-hsa-24490	107.923	-0.511797	0.36934	-1.38571	0.165836	0.566173
piR-60482	GXN_566141	piR-hsa-24604	15.2961	-0.464117	0.33539	-1.38381	0.166416	0.566173
piR-38268	GXN_572456	piR-hsa-30402	40.7816	0.353679	0.255309	1.3853	0.165961	0.566173
piR-30397	GXN_539984	piR-hsa-594	278.446	-0.404399	0.292344	-1.3833	0.166573	0.566386
piR-60213	GXN_565846	piR-hsa-24335	21.86	0.258815	0.187177	1.38273	0.166747	0.566657
piR-40656	GXN_542354	piR-hsa-2780	20.468	-0.303044	0.219232	-1.3823	0.16688	0.566786
piR-40178	GXN_541883	piR-hsa-2346	41.3633	0.344838	0.249789	1.38052	0.167427	0.56751
piR-44633	GXN_546686	piR-hsa-6769	105.098	0.410234	0.297212	1.38027	0.167503	0.56751
piR-44640	GXN_546693	piR-hsa-6776	119.223	0.273595	0.198248	1.38006	0.167568	0.56751
piR-54290	GXN_558327	piR-hsa-17469	1123.7	0.529329	0.383239	1.3812	0.167219	0.56751
piR-37079	GXN_571286	piR-hsa-29313	19.0231	0.382134	0.276847	1.38031	0.167491	0.56751
piR-56271	GXN_560501	piR-hsa-19441	97.7819	-0.205223	0.148855	-1.37868	0.167993	0.56805
piR-33157	GXN_564739	piR-hsa-23323	393.431	0.512422	0.371726	1.37849	0.168051	0.56805
piR-60773	GXN_566537	piR-hsa-24967	61.1836	0.279231	0.202559	1.37852	0.168043	0.56805
piR-38561	GXN_572770	piR-hsa-30695	17.909	0.279231	0.20259	1.37831	0.168107	0.56805
piR-30443	GXN_539471	piR-hsa-187	238.051	-0.422111	0.306862	-1.37557	0.168955	0.568145
piR-30982	GXN_540558	piR-hsa-1121	14.8425	-0.319123	0.2318	-1.37672	0.1686	0.568145
piR-51358	GXN_555069	piR-hsa-14468	37.0464	-0.39069	0.283969	-1.37582	0.168877	0.568145
piR-58459	GXN_562877	piR-hsa-21612	16.9505	-0.395517	0.287507	-1.37568	0.168921	0.568145
piR-33174	GXN_564758	piR-hsa-23340	1047.7	-0.346609	0.251996	-1.37546	0.16899	0.568145
piR-60507	GXN_566152	piR-hsa-24614	31.7838	-0.259687	0.188785	-1.37557	0.168955	0.568145
piR-61173	GXN_566957	piR-hsa-25351	26.1509	-0.495214	0.359477	-1.3776	0.168328	0.568145
piR-34349	GXN_568213	piR-hsa-26499	66.0087	-0.459617	0.333713	-1.37728	0.168426	0.568145
piR-35166	GXN_569189	piR-hsa-27390	60.0467	0.222004	0.161323	1.37614	0.168778	0.568145
piR-52808	GXN_556685	piR-hsa-15961	34.6729	0.197889	0.143941	1.37479	0.169197	0.568207
piR-38717	GXN_572937	piR-hsa-30851	16.9907	0.346913	0.25234	1.37478	0.169199	0.568207
piR-47897	GXN_550255	piR-hsa-10040	79.0578	-0.472429	0.344121	-1.37286	0.169796	0.569573
piR-57248	GXN_559672	piR-hsa-18691	312.316	-0.499417	0.363714	-1.3731	0.16972	0.569573
piR-56530	GXN_560769	piR-hsa-19686	35.9563	-0.344795	0.251293	-1.37208	0.170038	0.570065
piR-56773	GXN_561037	piR-hsa-19929	15.4557	-0.534923	0.390095	-1.37127	0.170292	0.570598
piR-57085	GXN_561364	piR-hsa-20226	24.2856	-0.26821	0.195769	-1.37004	0.170676	0.57098
piR-33653	GXN_565251	piR-hsa-23789	37.4883	0.394046	0.287629	1.36998	0.170693	0.57098
piR-38051	GXN_572238	piR-hsa-30199	40.8947	0.443465	0.323607	1.37038	0.170567	0.57098
piR-33515	GXN_564288	piR-hsa-22910	15.2988	0.299376	0.218584	1.36962	0.170806	0.57104
piR-46220	GXN_546863	piR-hsa-6931	31.2376	-0.22393	0.163663	-1.36824	0.171238	0.572164
piR-33855	GXN_565472	piR-hsa-23991	191.81	-0.38997	0.28525	-1.36712	0.171589	0.573018
piR-30716	GXN_540285	piR-hsa-869	24.3558	-0.45851	0.335663	-1.36598	0.171945	0.573066
piR-41978	GXN_543839	piR-hsa-4143	41.2042	0.460782	0.337482	1.36535	0.172142	0.573066
piR-50219	GXN_553939	piR-hsa-13430	22.2763	-0.282919	0.207143	-1.36582	0.171997	0.573066
piR-59690	GXN_564150	piR-hsa-22783	42.2136	0.296806	0.217189	1.36658	0.171758	0.573066
piR-61516	GXN_566474	piR-hsa-24911	15.7483	-0.53283	0.389956	-1.36638	0.171819	0.573066
piR-38451	GXN_572654	piR-hsa-30585	103.082	0.330595	0.242152	1.36524	0.172179	0.573066
piR-32854	GXN_553544	piR-hsa-13065	35.5372	-0.431268	0.315967	-1.36492	0.172279	0.573082
piR-40133	GXN_541834	piR-hsa-2301	59.1142	0.339468	0.249076	1.36291	0.17291	0.574125
piR-40533	GXN_542221	piR-hsa-2657	54.4739	-0.509947	0.374505	-1.36165	0.173307	0.574125
piR-42560	GXN_544426	piR-hsa-4681	13.2671	0.33476	0.245676	1.36261	0.173007	0.574125
piR-42776	GXN_544769	piR-hsa-4999	21.415	0.287057	0.21088	1.36123	0.17344	0.574125
piR-32893	GXN_553587	piR-hsa-13104	21.221	0.351768	0.258618	1.36018	0.173771	0.574125
piR-53168	GXN_557058	piR-hsa-16306	16.0296	0.330916	0.243171	1.36083	0.173566	0.574125
piR-54090	GXN_558126	piR-hsa-17284	39.4899	0.407423	0.29965	1.35966	0.173936	0.574125
piR-54258	GXN_558293	piR-hsa-17437	229.96	-0.327946	0.240733	-1.36228	0.173109	0.574125
piR-58060	GXN_562455	piR-hsa-21227	98.3421	0.528483	0.388166	1.36149	0.17336	0.574125
piR-60610	GXN_566264	piR-hsa-24717	31.4617	-0.479451	0.352499	-1.36015	0.173783	0.574125
piR-34439	GXN_568311	piR-hsa-26589	109.255	0.353247	0.259283	1.3624	0.173073	0.574125
piR-38192	GXN_572390	piR-hsa-30340	32.8715	0.307368	0.225921	1.36051	0.173669	0.574125
piR-38514	GXN_572720	piR-hsa-30648	62.2791	-0.488766	0.359122	-1.361	0.173512	0.574125
piR-39227	GXN_573588	piR-hsa-31431	22.8518	-0.269283	0.19802	-1.35988	0.173869	0.574125
piR-41818	GXN_543666	piR-hsa-3985	31.2486	0.258044	0.189868	1.35907	0.174124	0.574273
piR-55862	GXN_560067	piR-hsa-19047	98.7841	0.3127	0.230161	1.35861	0.174269	0.574273
piR-56560	GXN_560802	piR-hsa-19716	85.0271	-0.525553	0.386776	-1.35881	0.174208	0.574273
piR-43235	GXN_545215	piR-hsa-5415	57.6143	-0.454504	0.334622	-1.35826	0.17438	0.574322
piR-43773	GXN_545784	piR-hsa-5939	6340.42	0.330999	0.24423	1.35527	0.17533	0.576898
piR-50291	GXN_554000	piR-hsa-13488	73.0555	0.524991	0.387391	1.3552	0.175355	0.576898
piR-30483	GXN_540046	piR-hsa-651	16.9113	-0.320989	0.237499	-1.35154	0.176524	0.576936
piR-30532	GXN_540100	piR-hsa-700	21.8316	0.523207	0.387449	1.35039	0.176892	0.576936
piR-31520	GXN_541218	piR-hsa-1731	224.902	0.447253	0.330833	1.3519	0.176407	0.576936
piR-41197	GXN_543022	piR-hsa-3393	16.2149	-0.351237	0.259964	-1.3511	0.176663	0.576936
piR-41405	GXN_543235	piR-hsa-3586	87.4464	0.26449	0.195503	1.35287	0.176096	0.576936
piR-42377	GXN_544257	piR-hsa-4527	304.411	-0.475402	0.351413	-1.35283	0.17611	0.576936
piR-42628	GXN_544499	piR-hsa-4749	16.8527	-0.317358	0.234852	-1.35131	0.176595	0.576936
piR-48793	GXN_551206	piR-hsa-10907	280.299	0.294629	0.217809	1.3527	0.176153	0.576936
piR-55240	GXN_557479	piR-hsa-16690	33.6202	0.341955	0.253255	1.35024	0.176939	0.576936
piR-56452	GXN_560700	piR-hsa-19622	14.9614	0.492768	0.364697	1.35117	0.17664	0.576936
piR-33122	GXN_564702	piR-hsa-23288	31.4997	-0.368885	0.272942	-1.35152	0.17653	0.576936
piR-60345	GXN_565991	piR-hsa-24467	99.1405	-0.41529	0.307577	-1.3502	0.176951	0.576936
piR-60662	GXN_566321	piR-hsa-24769	36.1116	0.347052	0.256155	1.35485	0.175464	0.576936
piR-34800	GXN_568691	piR-hsa-26936	81.4112	0.297801	0.220589	1.35003	0.177007	0.576936
piR-37343	GXN_571537	piR-hsa-29548	32.7167	-0.343286	0.253843	-1.35235	0.176262	0.576936
piR-39980	GXN_573030	piR-hsa-30937	1010.48	0.229572	0.169792	1.35208	0.17635	0.576936
piR-39690	GXN_574054	piR-hsa-31864	12.7367	0.338636	0.250112	1.35394	0.175757	0.576936
piR-47965	GXN_550329	piR-hsa-10108	13.1333	0.285016	0.211337	1.34864	0.177454	0.577465
piR-51425	GXN_555142	piR-hsa-14535	26.7772	0.365945	0.271348	1.34862	0.177459	0.577465
piR-58172	GXN_562579	piR-hsa-21339	72.6361	0.31305	0.232082	1.34888	0.177377	0.577465
piR-37857	GXN_572045	piR-hsa-30019	17.2953	0.405759	0.300992	1.34807	0.177635	0.577724
piR-54160	GXN_558203	piR-hsa-17354	35.7069	0.388768	0.288738	1.34644	0.178161	0.578837
piR-60852	GXN_566622	piR-hsa-25046	9567.12	0.35463	0.26347	1.34599	0.178304	0.578837
piR-34517	GXN_568396	piR-hsa-26667	26.6892	0.410963	0.305354	1.34586	0.178348	0.578837
piR-39653	GXN_574016	piR-hsa-31827	39.6075	0.363901	0.270396	1.34581	0.178364	0.578837
piR-53325	GXN_557198	piR-hsa-16434	26.0936	0.375932	0.279516	1.34494	0.178644	0.579432
piR-30736	GXN_540306	piR-hsa-889	19.8048	-0.520369	0.387169	-1.34404	0.178937	0.579437
piR-46580	GXN_548815	piR-hsa-8709	25.7428	-0.282604	0.210227	-1.34428	0.178858	0.579437
piR-32401	GXN_552937	piR-hsa-12512	14.6914	-0.436962	0.325045	-1.34431	0.178848	0.579437
piR-37218	GXN_571073	piR-hsa-29119	14.013	0.283069	0.210718	1.34335	0.179158	0.57984
piR-52770	GXN_556644	piR-hsa-15923	24.8597	-0.476966	0.355154	-1.34299	0.179277	0.57991
piR-54322	GXN_558363	piR-hsa-17501	294.144	-0.523451	0.390055	-1.34199	0.179598	0.580323
piR-57062	GXN_561339	piR-hsa-20203	235.331	0.462274	0.344397	1.34227	0.179508	0.580323
piR-46930	GXN_549177	piR-hsa-9045	17.4541	-0.325413	0.242544	-1.34167	0.179703	0.580348
piR-38030	GXN_572215	piR-hsa-30178	24.3985	-0.430795	0.321177	-1.3413	0.179823	0.580423
piR-54054	GXN_558087	piR-hsa-17248	17.7157	-0.497152	0.370741	-1.34097	0.17993	0.580453
piR-56206	GXN_560429	piR-hsa-19376	31.3554	0.386621	0.288388	1.34063	0.180041	0.5805
piR-39644	GXN_574006	piR-hsa-31818	17.3665	0.284748	0.2125	1.33999	0.180249	0.580857
piR-43184	GXN_545176	piR-hsa-5378	24.1414	-0.293092	0.218895	-1.33896	0.180584	0.581332
piR-44885	GXN_547059	piR-hsa-7109	17.8937	0.482768	0.36064	1.33864	0.180688	0.581332
piR-48792	GXN_551205	piR-hsa-10906	32.7364	-0.480052	0.358564	-1.33882	0.18063	0.581332
piR-46354	GXN_548571	piR-hsa-8486	12.7559	0.306229	0.228828	1.33825	0.180815	0.581421
piR-53423	GXN_557306	piR-hsa-16532	58.0579	0.329039	0.245926	1.33796	0.18091	0.581421
piR-50355	GXN_554069	piR-hsa-13552	15.2006	0.395802	0.2959	1.33762	0.18102	0.581461
piR-39151	GXN_573520	piR-hsa-31370	74.0202	-0.36533	0.273268	-1.33689	0.181258	0.581914
piR-61323	GXN_567088	piR-hsa-25472	44.9286	0.282364	0.21133	1.33613	0.181507	0.5824
piR-41392	GXN_543221	piR-hsa-3573	160.201	0.407	0.304754	1.3355	0.181712	0.582746
piR-42189	GXN_544069	piR-hsa-4354	63.7296	0.247121	0.185146	1.33474	0.181962	0.582854
piR-38621	GXN_572833	piR-hsa-30755	31.2765	-0.394773	0.29582	-1.3345	0.182038	0.582854
piR-38734	GXN_573066	piR-hsa-30956	32.8887	-0.519608	0.389313	-1.33468	0.181981	0.582854
piR-61309	GXN_567073	piR-hsa-25458	14.8237	-0.306827	0.230288	-1.33236	0.182741	0.584792
piR-42132	GXN_544008	piR-hsa-4297	16.2081	-0.300094	0.2253	-1.33198	0.182868	0.584885
piR-45875	GXN_548063	piR-hsa-8022	604.958	-0.342043	0.256863	-1.33162	0.182986	0.58495
piR-52680	GXN_556579	piR-hsa-15863	51.8549	0.23601	0.177321	1.33097	0.183197	0.585312
piR-41789	GXN_543634	piR-hsa-3956	13.916	0.328389	0.24687	1.33021	0.183449	0.585608
piR-33226	GXN_564815	piR-hsa-23392	90.8693	0.264499	0.198857	1.3301	0.183486	0.585608
piR-32821	GXN_553508	piR-hsa-13032	281.822	0.458837	0.345289	1.32885	0.183898	0.586611
piR-31530	GXN_541229	piR-hsa-1741	280.451	0.338761	0.255102	1.32795	0.184196	0.586697
piR-41912	GXN_543770	piR-hsa-4078	23.0341	-0.31009	0.233628	-1.32728	0.184416	0.586697
piR-42997	GXN_544976	piR-hsa-5191	16.028	0.320941	0.241762	1.32751	0.184342	0.586697
piR-32435	GXN_552974	piR-hsa-12546	108.45	0.316838	0.238676	1.32748	0.184348	0.586697
piR-58848	GXN_563284	piR-hsa-21984	116.485	-0.471213	0.354932	-1.32761	0.184306	0.586697
piR-51821	GXN_555684	piR-hsa-15034	591.689	0.380213	0.286685	1.32624	0.18476	0.587389
piR-38208	GXN_572408	piR-hsa-30356	15.7034	0.376686	0.28407	1.32603	0.18483	0.587389
piR-53564	GXN_557571	piR-hsa-16772	411.692	0.480687	0.362653	1.32547	0.185014	0.587664
piR-42171	GXN_544050	piR-hsa-4336	21.9884	-0.247415	0.186793	-1.32454	0.185324	0.588336
piR-59740	GXN_564205	piR-hsa-22833	15.4771	-0.286706	0.216653	-1.32334	0.185721	0.589283
piR-50867	GXN_554579	piR-hsa-14021	29.6576	0.331877	0.25094	1.32254	0.185989	0.589821
piR-46351	GXN_548568	piR-hsa-8483	28.2856	-0.230068	0.174132	-1.32123	0.186426	0.590892
piR-61689	GXN_567472	piR-hsa-25824	23.9757	-0.408019	0.309025	-1.32034	0.186721	0.591513
piR-38330	GXN_572524	piR-hsa-30464	146.335	0.513538	0.389402	1.31879	0.18724	0.592845
piR-31769	GXN_541455	piR-hsa-1951	355.505	-0.319586	0.242621	-1.31722	0.187764	0.593781
piR-45577	GXN_547752	piR-hsa-7740	99.2432	0.364393	0.276774	1.31657	0.187983	0.593781
piR-45774	GXN_547953	piR-hsa-7921	16.0555	0.262683	0.199678	1.31554	0.18833	0.593781
piR-48699	GXN_551102	piR-hsa-10813	192.96	-0.305532	0.232175	-1.31596	0.188189	0.593781
piR-51788	GXN_555647	piR-hsa-15001	78.727	-0.362227	0.275288	-1.31581	0.188238	0.593781
piR-54065	GXN_558099	piR-hsa-17259	63.9474	0.410845	0.312214	1.31591	0.188205	0.593781
piR-54778	GXN_558843	piR-hsa-17942	31.2967	0.365778	0.278029	1.31561	0.188305	0.593781
piR-55420	GXN_559501	piR-hsa-18541	35.4317	0.353884	0.268655	1.31724	0.187757	0.593781
piR-43495	GXN_545479	piR-hsa-5661	14.7964	-0.356797	0.271627	-1.31356	0.188995	0.593983
piR-50876	GXN_554589	piR-hsa-14030	17.171	0.251097	0.191049	1.3143	0.188745	0.593983
piR-50889	GXN_554603	piR-hsa-14043	28610.5	-0.411834	0.313554	-1.31344	0.189034	0.593983
piR-57143	GXN_561428	piR-hsa-20284	66.4808	0.256397	0.195206	1.31347	0.189026	0.593983
piR-58186	GXN_562594	piR-hsa-21353	336.993	-0.401931	0.305778	-1.31445	0.188694	0.593983
piR-33473	GXN_565070	piR-hsa-23624	131.358	0.418464	0.318632	1.31332	0.189077	0.593983
piR-39921	GXN_574290	piR-hsa-32079	19.4143	-0.411193	0.313105	-1.31328	0.189089	0.593983
piR-53544	GXN_557549	piR-hsa-16752	109.567	-0.252753	0.192646	-1.31201	0.189516	0.595011
piR-59768	GXN_564345	piR-hsa-22963	38.5369	-0.246175	0.187698	-1.31154	0.189674	0.595194
piR-57459	GXN_561737	piR-hsa-20571	23.067	0.403229	0.307624	1.31079	0.18993	0.595372
piR-57882	GXN_562278	piR-hsa-21066	15.0253	0.336647	0.256822	1.31082	0.18992	0.595372
piR-30799	GXN_540375	piR-hsa-952	23467.4	-0.364249	0.278228	-1.30917	0.190476	0.595408
piR-31469	GXN_541162	piR-hsa-1680	617.32	0.493593	0.377018	1.3092	0.190466	0.595408
piR-46859	GXN_549100	piR-hsa-8974	47.5388	0.336621	0.257219	1.30869	0.190638	0.595408
piR-47048	GXN_549400	piR-hsa-9249	13.0122	0.411403	0.314051	1.30999	0.1902	0.595408
piR-32103	GXN_552631	piR-hsa-12230	16.9307	-0.355142	0.271056	-1.31021	0.190123	0.595408
piR-51300	GXN_555005	piR-hsa-14410	39.9807	0.495182	0.378335	1.30885	0.190587	0.595408
piR-36244	GXN_570283	piR-hsa-28393	12.7764	0.363579	0.277809	1.30874	0.190624	0.595408
piR-56653	GXN_560905	piR-hsa-19809	71710.9	0.190769	0.145817	1.30828	0.190778	0.595534
piR-42307	GXN_544181	piR-hsa-4457	21.3498	-0.308979	0.236411	-1.30695	0.191228	0.596542
piR-46596	GXN_548833	piR-hsa-8725	84.6225	-0.367976	0.281661	-1.30645	0.1914	0.596542
piR-34121	GXN_567979	piR-hsa-26287	119.138	-0.318009	0.243406	-1.3065	0.191384	0.596542
piR-37167	GXN_571381	piR-hsa-29401	25.0553	-0.464334	0.355546	-1.30597	0.191561	0.596733
piR-51233	GXN_554948	piR-hsa-14357	27.2195	-0.322849	0.247558	-1.30413	0.192188	0.597839
piR-35922	GXN_569950	piR-hsa-28086	74.8872	-0.354122	0.271483	-1.3044	0.192098	0.597839
piR-39642	GXN_574004	piR-hsa-31816	329.605	0.47586	0.364909	1.30405	0.192216	0.597839
piR-31052	GXN_540632	piR-hsa-1191	2659.11	0.380615	0.292759	1.30009	0.193568	0.601732
piR-52356	GXN_556247	piR-hsa-15555	13.6028	-0.371848	0.286201	-1.29926	0.193856	0.602314
piR-43886	GXN_545907	piR-hsa-6052	27.2123	-0.428098	0.329711	-1.29841	0.194148	0.602594
piR-57077	GXN_561355	piR-hsa-20218	33.869	0.367549	0.283028	1.29863	0.19407	0.602594
piR-45301	GXN_547465	piR-hsa-7479	14.1408	-0.32459	0.250218	-1.29723	0.194551	0.603402
piR-36124	GXN_570153	piR-hsa-28273	13.1368	-0.441799	0.340693	-1.29677	0.194711	0.603402
piR-37658	GXN_571862	piR-hsa-29849	37.3768	0.307382	0.237022	1.29685	0.194682	0.603402
piR-43771	GXN_545782	piR-hsa-5937	221.753	0.429249	0.331305	1.29563	0.195102	0.603989
piR-38673	GXN_572890	piR-hsa-30807	13.5818	0.306166	0.23626	1.29589	0.195014	0.603989
piR-43349	GXN_545338	piR-hsa-5529	196.275	0.426383	0.329802	1.29285	0.196064	0.604624
piR-44757	GXN_546918	piR-hsa-6981	144.316	0.362472	0.280507	1.2922	0.196287	0.604624
piR-45359	GXN_547528	piR-hsa-7537	23.3484	0.29318	0.226729	1.29309	0.195982	0.604624
piR-48946	GXN_551371	piR-hsa-11060	47.7341	0.319132	0.24683	1.29293	0.196037	0.604624
piR-52724	GXN_555258	piR-hsa-14642	17.2248	0.301612	0.233317	1.29271	0.196111	0.604624
piR-51590	GXN_555432	piR-hsa-14803	47.3443	0.419431	0.324632	1.29202	0.19635	0.604624
piR-55056	GXN_559117	piR-hsa-18191	43.7094	0.398607	0.308563	1.29182	0.196419	0.604624
piR-59156	GXN_563620	piR-hsa-22292	15.2502	-0.248008	0.191796	-1.29309	0.195981	0.604624
piR-33063	GXN_564637	piR-hsa-23229	17.1375	-0.281627	0.217688	-1.29372	0.195762	0.604624
piR-36970	GXN_571167	piR-hsa-29204	20.4193	-0.358719	0.277244	-1.29387	0.19571	0.604624
piR-38953	GXN_573305	piR-hsa-31173	39.5547	-0.327149	0.253193	-1.29209	0.196325	0.604624
piR-40256	GXN_541935	piR-hsa-2395	13.699	0.340826	0.263966	1.29118	0.196643	0.604997
piR-42130	GXN_544005	piR-hsa-4295	15.9169	-0.299529	0.232069	-1.29069	0.196811	0.604997
piR-33768	GXN_565376	piR-hsa-23904	14.7506	-0.456986	0.354152	-1.29037	0.196924	0.604997
piR-39279	GXN_573644	piR-hsa-31483	40.4624	0.419468	0.325093	1.2903	0.196945	0.604997
piR-61945	GXN_567735	piR-hsa-26065	75.6414	0.255765	0.198347	1.28948	0.197232	0.605566
piR-41683	GXN_543535	piR-hsa-3864	211.247	-0.484888	0.376432	-1.28812	0.197705	0.606707
piR-54775	GXN_558840	piR-hsa-17939	12.7863	-0.372152	0.28914	-1.2871	0.198059	0.607484
piR-49074	GXN_551618	piR-hsa-11291	13.5035	-0.292923	0.227947	-1.28505	0.198775	0.608743
piR-50958	GXN_554679	piR-hsa-14112	15.5745	-0.412276	0.320794	-1.28517	0.198731	0.608743
piR-39505	GXN_573858	piR-hsa-31680	61.5484	0.331044	0.257518	1.28552	0.198611	0.608743
piR-42464	GXN_542516	piR-hsa-2930	53.8077	-0.355787	0.277092	-1.284	0.199141	0.608926
piR-32149	GXN_552680	piR-hsa-12276	27.3931	-0.360828	0.280986	-1.28415	0.19909	0.608926
piR-51291	GXN_554996	piR-hsa-14401	15.4114	-0.26718	0.208071	-1.28408	0.199114	0.608926
piR-56830	GXN_561099	piR-hsa-19986	156.267	-0.432896	0.337222	-1.28371	0.199243	0.608928
piR-42424	GXN_544309	piR-hsa-4574	84.2154	0.472091	0.367994	1.28288	0.199535	0.609003
piR-51275	GXN_554978	piR-hsa-14385	20.6092	-0.34216	0.266735	-1.28277	0.199573	0.609003
piR-34944	GXN_568849	piR-hsa-27080	14.383	-0.377665	0.294353	-1.28304	0.199479	0.609003
piR-59241	GXN_562111	piR-hsa-20913	13.641	0.298404	0.232737	1.28215	0.19979	0.609354
piR-39483	GXN_572995	piR-hsa-30905	13.3279	-0.280712	0.219096	-1.28123	0.200112	0.610026
piR-32850	GXN_553539	piR-hsa-13061	65.8181	0.443397	0.346524	1.27955	0.200702	0.61089
piR-33838	GXN_565453	piR-hsa-23974	14.7393	0.490209	0.383026	1.27983	0.200605	0.61089
piR-37201	GXN_571416	piR-hsa-29435	14.7875	0.336127	0.262573	1.28013	0.2005	0.61089
piR-38502	GXN_572708	piR-hsa-30636	143.784	0.355253	0.277759	1.279	0.200898	0.611174
piR-61899	GXN_567684	piR-hsa-26019	16.0568	0.459677	0.35954	1.27851	0.201068	0.611382
piR-55293	GXN_559362	piR-hsa-18414	16.3016	-0.486131	0.3805	-1.27761	0.201386	0.612039
piR-42565	GXN_544432	piR-hsa-4686	51.912	-0.332974	0.260839	-1.27655	0.201761	0.612245
piR-42688	GXN_544565	piR-hsa-4809	850.287	-0.445584	0.349012	-1.2767	0.201708	0.612245
piR-52200	GXN_556081	piR-hsa-15399	76.6686	-0.310035	0.242848	-1.27666	0.201721	0.612245
piR-51143	GXN_554850	piR-hsa-14267	16.462	-0.405289	0.317712	-1.27565	0.20208	0.612902
piR-43204	GXN_545198	piR-hsa-5398	103.716	0.362138	0.284212	1.27418	0.202599	0.61384
piR-43960	GXN_545987	piR-hsa-6126	10085.1	0.461134	0.362054	1.27366	0.202783	0.61384
piR-44244	GXN_546283	piR-hsa-6395	33.6021	-0.439829	0.34537	-1.2735	0.202841	0.61384
piR-56982	GXN_561267	piR-hsa-20138	25.1714	-0.311074	0.244301	-1.27332	0.202903	0.61384
piR-33423	GXN_565015	piR-hsa-23574	2414.44	0.390313	0.306513	1.2734	0.202876	0.61384
piR-48390	GXN_550778	piR-hsa-10518	214.145	0.330763	0.259891	1.2727	0.203125	0.6142
piR-30232	GXN_539808	piR-hsa-429	88.3446	-0.395223	0.311434	-1.26904	0.204426	0.617528
piR-43619	GXN_545615	piR-hsa-5785	115.812	0.415583	0.327517	1.26889	0.204481	0.617528
piR-53879	GXN_557897	piR-hsa-17073	28.334	0.407656	0.321309	1.26874	0.204535	0.617528
piR-31701	GXN_540813	piR-hsa-1359	119.729	0.286905	0.226512	1.26662	0.20529	0.618247
piR-42317	GXN_544192	piR-hsa-4467	17.1029	0.342908	0.270575	1.26733	0.205037	0.618247
piR-52594	GXN_556486	piR-hsa-15778	56.2203	0.274538	0.216715	1.26681	0.205221	0.618247
piR-58539	GXN_562963	piR-hsa-21691	14.877	0.399464	0.315144	1.26756	0.204955	0.618247
piR-59252	GXN_563707	piR-hsa-22374	42.2495	0.379021	0.299197	1.26679	0.205229	0.618247
piR-47537	GXN_549877	piR-hsa-9694	52.1312	-0.487792	0.38544	-1.26555	0.205676	0.618474
piR-56973	GXN_561257	piR-hsa-20129	220.936	-0.407426	0.321874	-1.26579	0.205587	0.618474
piR-60173	GXN_565803	piR-hsa-24295	39.1827	-0.365355	0.288661	-1.26569	0.205624	0.618474
piR-55419	GXN_559500	piR-hsa-18540	35.1823	0.341295	0.269863	1.2647	0.20598	0.619078
piR-45564	GXN_547738	piR-hsa-7727	21.4776	0.388525	0.307334	1.26418	0.206165	0.619325
piR-44622	GXN_546674	piR-hsa-6758	25.024	0.221249	0.175118	1.26343	0.206435	0.619654
piR-54998	GXN_557469	piR-hsa-16681	228.17	0.246562	0.195218	1.26301	0.206586	0.619654
piR-39356	GXN_573728	piR-hsa-31560	14.5078	0.300813	0.238125	1.26326	0.206497	0.619654
piR-42086	GXN_543957	piR-hsa-4251	116.395	0.437765	0.346817	1.26224	0.206864	0.620176
piR-43517	GXN_545503	piR-hsa-5683	116.13	-0.232003	0.183954	-1.2612	0.207236	0.620757
piR-47303	GXN_549658	piR-hsa-9489	44.861	-0.237712	0.188501	-1.26107	0.207285	0.620757
piR-49736	GXN_551471	piR-hsa-11153	35.9813	-0.392251	0.311105	-1.26083	0.207369	0.620757
piR-35577	GXN_569590	piR-hsa-27757	14.5272	0.381865	0.302984	1.26035	0.207543	0.620968
[truncated: 30,195 more rows]

## Sheet: neurons
piRNA name (RNAdb2.0)	piRNA ID (Genomatix)	piRNA name (piRBase)	baseMean	log2FoldChange	lfcSE	stat	pvalue	padj
piR-44766	GXN_546928	piR-hsa-6990	658.767	3.62259	0.633189	5.72118	1.05788e-08	3.01918e-05
piR-51742	GXN_555597	piR-hsa-14955	158.115	1.56575	0.306223	5.11311	3.16895e-07	0.000256874
piR-34681	GXN_568576	piR-hsa-26831	200.259	1.34547	0.266615	5.04648	4.50025e-07	0.000256874
piR-35325	GXN_569348	piR-hsa-27534	600.931	2.89856	0.571593	5.07102	3.95686e-07	0.000256874
piR-35408	GXN_569438	piR-hsa-27617	21066.3	1.87582	0.369786	5.07271	3.92188e-07	0.000256874
piR-38278	GXN_572467	piR-hsa-30412	107.054	2.90213	0.584619	4.96413	6.90089e-07	0.000328252
piR-51790	GXN_555649	piR-hsa-15003	56.5013	1.89009	0.385437	4.90376	9.40197e-07	0.000383332
piR-35315	GXN_569337	piR-hsa-27524	202.246	2.30067	0.472058	4.87369	1.09532e-06	0.000390756
piR-43603	GXN_545598	piR-hsa-5769	363.865	3.08533	0.636282	4.84899	1.24089e-06	0.000393501
piR-35316	GXN_569338	piR-hsa-27525	202.019	2.27818	0.472655	4.81996	1.43588e-06	0.000409799
piR-55235	GXN_559314	piR-hsa-18370	190.917	1.72283	0.363092	4.74489	2.08617e-06	0.000541267
piR-50189	GXN_553907	piR-hsa-13400	34.6721	2.51314	0.541341	4.64244	3.44314e-06	0.000818893
piR-47003	GXN_549351	piR-hsa-9204	268.074	-1.52555	0.337399	-4.52152	6.13973e-06	0.00116819
piR-50785	GXN_554489	piR-hsa-13939	69.8923	1.67448	0.3695	4.53174	5.84989e-06	0.00116819
piR-39179	GXN_573551	piR-hsa-31398	58.9228	2.4289	0.534593	4.54345	5.53413e-06	0.00116819
piR-55504	GXN_559578	piR-hsa-18607	26.4622	1.72594	0.393403	4.38721	1.14816e-05	0.00192756
piR-38653	GXN_572868	piR-hsa-30787	189.506	1.82994	0.415927	4.39966	1.08421e-05	0.00192756
piR-30858	GXN_540440	piR-hsa-1011	38.528	1.72176	0.394952	4.35942	1.30405e-05	0.0019541
piR-44421	GXN_546476	piR-hsa-6572	2253.13	1.67854	0.385985	4.34872	1.36937e-05	0.0019541
piR-37431	GXN_571632	piR-hsa-29636	61.7144	1.43278	0.329036	4.35447	1.33388e-05	0.0019541
piR-34961	GXN_568868	piR-hsa-27097	334.229	2.52239	0.588106	4.289	1.79477e-05	0.00243918
piR-45082	GXN_547259	piR-hsa-7289	40.416	1.79261	0.42347	4.23315	2.30438e-05	0.00274029
piR-55022	GXN_559080	piR-hsa-18157	106.324	2.03861	0.48041	4.24347	2.20087e-05	0.00274029
piR-57144	GXN_561429	piR-hsa-20285	46.8851	1.58818	0.374998	4.23518	2.28366e-05	0.00274029
piR-60692	GXN_566354	piR-hsa-24799	27.8821	2.54502	0.606035	4.19946	2.67548e-05	0.00305433
piR-30433	GXN_539460	piR-hsa-177	40.2772	1.77661	0.425116	4.17912	2.9264e-05	0.00309331
piR-40749	GXN_542548	piR-hsa-2961	36.7906	1.89031	0.451505	4.18669	2.83057e-05	0.00309331
piR-48424	GXN_550816	piR-hsa-10552	89.6651	2.15906	0.519951	4.15243	3.28969e-05	0.00335313
piR-55215	GXN_559292	piR-hsa-18350	48.6044	1.53449	0.371229	4.13354	3.57217e-05	0.0035155
piR-40185	GXN_541891	piR-hsa-2353	31.5241	2.25059	0.558107	4.03253	5.51791e-05	0.00492129
piR-57266	GXN_561527	piR-hsa-20378	190.682	1.67335	0.414294	4.03905	5.36679e-05	0.00492129
piR-36771	GXN_570839	piR-hsa-28905	176.157	-1.50744	0.372727	-4.04435	5.24687e-05	0.00492129
piR-50808	GXN_554514	piR-hsa-13962	766.538	2.61603	0.651227	4.01708	5.89235e-05	0.00504019
piR-33407	GXN_564998	piR-hsa-23558	58.3117	1.36904	0.341182	4.01264	6.00443e-05	0.00504019
piR-60493	GXN_564308	piR-hsa-22928	32.8647	1.53386	0.384357	3.99073	6.58692e-05	0.00537116
piR-56068	GXN_560277	piR-hsa-19238	1038.56	2.04056	0.517728	3.94137	8.10159e-05	0.00642276
piR-30593	GXN_540166	piR-hsa-761	202.187	1.64821	0.420935	3.91559	9.01822e-05	0.00677316
piR-46539	GXN_548772	piR-hsa-8668	33.7283	2.04991	0.52335	3.9169	8.96952e-05	0.00677316
piR-34736	GXN_568621	piR-hsa-26872	317.925	-1.57911	0.405901	-3.89038	0.000100086	0.00732424
piR-43682	GXN_545684	piR-hsa-5848	60.0129	1.9825	0.515977	3.84222	0.000121929	0.00805444
piR-51716	GXN_555568	piR-hsa-14929	38.189	1.97838	0.514236	3.84723	0.000119462	0.00805444
piR-33157	GXN_564739	piR-hsa-23323	1288.25	1.74371	0.453368	3.84612	0.000120001	0.00805444
piR-35250	GXN_569265	piR-hsa-27459	126.168	2.0008	0.518785	3.85669	0.000114932	0.00805444
piR-39722	GXN_573002	piR-hsa-30911	63.7952	1.79207	0.46696	3.83773	0.000124175	0.00805444
piR-48014	GXN_550366	piR-hsa-10142	96.4055	2.52428	0.66419	3.80054	0.000144379	0.00833812
piR-48815	GXN_551230	piR-hsa-10929	33.5769	1.60263	0.420917	3.80748	0.00014039	0.00833812
piR-51669	GXN_555517	piR-hsa-14882	198.512	1.92823	0.507744	3.79764	0.000146078	0.00833812
piR-52009	GXN_555872	piR-hsa-15208	86.6266	1.88061	0.492692	3.81701	0.000135077	0.00833812
piR-52617	GXN_556511	piR-hsa-15801	104.796	1.46675	0.385881	3.80104	0.000144088	0.00833812
piR-37577	GXN_571775	piR-hsa-29768	163.27	2.11811	0.557387	3.80007	0.000144656	0.00833812
piR-50783	GXN_554487	piR-hsa-13937	225.319	1.73812	0.459365	3.78375	0.000154486	0.00864514
piR-34740	GXN_568625	piR-hsa-26876	73.9124	1.75316	0.464399	3.77511	0.00015994	0.00877822
piR-30878	GXN_540462	piR-hsa-1031	33.4266	-1.39947	0.371679	-3.76528	0.000166365	0.00895862
piR-30555	GXN_540124	piR-hsa-723	25.8627	1.44002	0.383153	3.75834	0.000171044	0.00904002
piR-32632	GXN_553190	piR-hsa-12743	25.6057	2.24165	0.600653	3.73202	0.000189952	0.00985678
piR-38447	GXN_572650	piR-hsa-30581	272.438	1.35952	0.366884	3.70559	0.000210897	0.0107482
piR-43295	GXN_545279	piR-hsa-5475	197.948	1.32617	0.358322	3.70105	0.000214705	0.0107503
piR-40178	GXN_541883	piR-hsa-2346	121.8	-1.60512	0.435646	-3.68447	0.000229183	0.0112097
piR-47266	GXN_549618	piR-hsa-9452	60.1013	-1.69716	0.460978	-3.68164	0.000231735	0.0112097
piR-44981	GXN_547148	piR-hsa-7190	1411.66	1.81236	0.49321	3.67461	0.00023821	0.0112617
piR-54036	GXN_558067	piR-hsa-17230	89.9691	2.08882	0.568857	3.67196	0.000240701	0.0112617
piR-30173	GXN_539430	piR-hsa-150	35.6351	1.30443	0.356865	3.65526	0.000256926	0.0118269
piR-60278	GXN_565917	piR-hsa-24400	134.187	2.07991	0.570249	3.64738	0.00026493	0.0120018
piR-30498	GXN_540062	piR-hsa-666	75.2311	1.12384	0.309703	3.62878	0.000284764	0.0126987
NA	GXN_446880	NA	449.938	-1.71855	0.47543	-3.61473	0.000300665	0.0132015
piR-50826	GXN_554534	piR-hsa-13980	28.6437	-1.68157	0.46727	-3.59871	0.000319797	0.0135003
piR-55553	GXN_559743	piR-hsa-18754	34.1907	1.45703	0.405044	3.5972	0.000321661	0.0135003
piR-33420	GXN_565012	piR-hsa-23571	49.2537	1.45696	0.404748	3.59968	0.000318609	0.0135003
piR-46898	GXN_549143	piR-hsa-9013	43.562	1.73932	0.484789	3.58779	0.000333492	0.013597
piR-54006	GXN_558034	piR-hsa-17200	139.114	1.58334	0.441236	3.58843	0.000332677	0.013597
piR-58479	GXN_562898	piR-hsa-21632	249.152	-1.71513	0.482041	-3.55807	0.000373596	0.0150175
piR-51493	GXN_555217	piR-hsa-14603	60.9897	1.51578	0.426674	3.55255	0.000381514	0.0150639
piR-38160	GXN_572355	piR-hsa-30308	67.677	1.50354	0.42354	3.54995	0.000385307	0.0150639
piR-56056	GXN_560264	piR-hsa-19226	44.5225	-1.42242	0.40261	-3.53301	0.000410858	0.0154713
piR-35510	GXN_569516	piR-hsa-27690	77597.3	1.64373	0.465346	3.53228	0.00041199	0.0154713
piR-36339	GXN_570387	piR-hsa-28488	1922.63	1.14064	0.322666	3.53505	0.000407693	0.0154713
piR-43605	GXN_545600	piR-hsa-5771	1166.01	2.10405	0.596913	3.52489	0.000423663	0.0157031
piR-42781	GXN_544774	piR-hsa-5004	67.1808	1.43944	0.409757	3.51291	0.000443223	0.0162174
piR-32984	GXN_553683	piR-hsa-13195	204.759	1.88704	0.539017	3.50089	0.000463703	0.016752
piR-36058	GXN_570081	piR-hsa-28207	1123.22	1.74666	0.500179	3.49207	0.000479295	0.0170989
piR-38306	GXN_572498	piR-hsa-30440	1667.74	1.93511	0.561425	3.44678	0.00056731	0.0199889
piR-41947	GXN_543806	piR-hsa-4112	73.8168	-1.01875	0.296255	-3.43877	0.000584368	0.0203389
piR-58341	GXN_562748	piR-hsa-21494	28.9672	1.79498	0.522605	3.43467	0.000593267	0.0203998
piR-31776	GXN_541463	piR-hsa-1958	29.1167	1.80721	0.527654	3.42499	0.000614815	0.0204033
piR-44480	GXN_546521	piR-hsa-6616	7675.33	1.40622	0.410512	3.42553	0.0006136	0.0204033
piR-38740	GXN_573073	piR-hsa-30962	128.93	1.49479	0.435686	3.43089	0.000601614	0.0204033
piR-40628	GXN_542323	piR-hsa-2752	103.736	1.62984	0.477837	3.41086	0.000647576	0.0207661
piR-43518	GXN_545504	piR-hsa-5684	60.4603	-1.36795	0.400994	-3.41141	0.000646273	0.0207661
piR-48225	GXN_550597	piR-hsa-10353	69.4801	-1.52178	0.44538	-3.41683	0.000633555	0.0207661
piR-47897	GXN_550255	piR-hsa-10040	48.7616	1.13402	0.333104	3.40439	0.000663121	0.0210283
piR-33424	GXN_565016	piR-hsa-23575	75.1948	2.09575	0.617539	3.39371	0.000689522	0.0216252
piR-31000	GXN_540577	piR-hsa-1139	69.4955	1.3923	0.412432	3.37583	0.000735925	0.0219824
piR-40157	GXN_541860	piR-hsa-2325	127.482	1.57874	0.467678	3.37569	0.000736296	0.0219824
piR-43211	GXN_545205	piR-hsa-5405	36.7085	1.35974	0.403154	3.37275	0.000744213	0.0219824
piR-45782	GXN_547962	piR-hsa-7929	472.012	1.83726	0.54508	3.37063	0.000749964	0.0219824
piR-52014	GXN_555877	piR-hsa-15213	123.836	1.17974	0.350189	3.36885	0.000754827	0.0219824
piR-61135	GXN_566915	piR-hsa-25313	162.721	-1.63462	0.484956	-3.37065	0.000749919	0.0219824
piR-36174	GXN_570208	piR-hsa-28323	53.2675	-0.989479	0.292292	-3.38524	0.000711169	0.0219824
piR-60577	GXN_566228	piR-hsa-24684	22478.2	-1.04142	0.309409	-3.36584	0.000763098	0.0219988
piR-43921	GXN_545945	piR-hsa-6087	401.176	1.4723	0.437791	3.36302	0.000770959	0.0220032
piR-60024	GXN_564594	piR-hsa-23190	50.3414	1.33361	0.397677	3.35349	0.000797986	0.022549
piR-38498	GXN_572704	piR-hsa-30632	106256	1.38515	0.413591	3.34909	0.000810783	0.022686
piR-31351	GXN_541052	piR-hsa-1576	86.8867	1.25754	0.376279	3.34203	0.000831669	0.022927
piR-46204	GXN_548423	piR-hsa-8351	32.0051	1.23537	0.370661	3.33287	0.00085956	0.022927
piR-49638	GXN_552178	piR-hsa-11810	40.1854	1.28165	0.384393	3.33422	0.000855391	0.022927
piR-59475	GXN_563951	piR-hsa-22597	28.5864	-1.59152	0.476558	-3.33961	0.000838964	0.022927
piR-38051	GXN_572238	piR-hsa-30199	28.2649	-1.35421	0.406183	-3.33398	0.000856116	0.022927
piR-42730	GXN_544719	piR-hsa-4953	97.237	1.25526	0.377545	3.32478	0.000884873	0.0233836
piR-38501	GXN_572707	piR-hsa-30635	332.95	1.44839	0.436334	3.31945	0.000901952	0.0236162
piR-56205	GXN_560428	piR-hsa-19375	28.6912	1.69753	0.512728	3.31077	0.000930381	0.0241392
piR-43344	GXN_545333	piR-hsa-5524	285.029	0.845962	0.255907	3.30574	0.000947244	0.0243553
piR-48959	GXN_551385	piR-hsa-11073	84.7427	2.04674	0.619732	3.30262	0.000957848	0.024408
piR-40789	GXN_542592	piR-hsa-3001	38.692	1.41319	0.431475	3.27526	0.00105566	0.0245487
piR-42780	GXN_544773	piR-hsa-5003	196.125	1.89183	0.577721	3.27464	0.00105799	0.0245487
piR-43348	GXN_545337	piR-hsa-5528	74.3023	1.34086	0.407549	3.29005	0.00100169	0.0245487
piR-46798	GXN_549034	piR-hsa-8913	48.0199	1.78746	0.543509	3.28875	0.00100633	0.0245487
piR-48209	GXN_550579	piR-hsa-10337	55.6885	-1.15557	0.350374	-3.2981	0.000973415	0.0245487
piR-48353	GXN_550738	piR-hsa-10481	65.9774	-1.85064	0.562262	-3.29141	0.000996867	0.0245487
piR-32294	GXN_552821	piR-hsa-12406	136.144	0.912857	0.277953	3.28421	0.00102269	0.0245487
piR-54008	GXN_558036	piR-hsa-17202	57.1063	1.7937	0.547056	3.27882	0.00104242	0.0245487
piR-56990	GXN_559644	piR-hsa-18666	259.739	2.16088	0.658875	3.27965	0.00103936	0.0245487
piR-60202	GXN_565835	piR-hsa-24324	39.2816	-2.31363	0.703661	-3.28798	0.00100907	0.0245487
piR-35135	GXN_569155	piR-hsa-27359	47.7567	-1.32775	0.404364	-3.28355	0.00102508	0.0245487
piR-40678	GXN_542378	piR-hsa-2802	43.8741	-1.32792	0.406813	-3.2642	0.00109773	0.0249923
piR-45687	GXN_547873	piR-hsa-7849	7576.16	-1.47702	0.452559	-3.26371	0.00109964	0.0249923
piR-56037	GXN_560243	piR-hsa-19207	73.3416	-0.993639	0.304554	-3.26261	0.00110393	0.0249923
piR-60746	GXN_564330	piR-hsa-22948	274.002	-1.25778	0.385761	-3.26051	0.00111213	0.0249923
piR-41063	GXN_542876	piR-hsa-3259	56.3022	1.8215	0.560924	3.24732	0.00116496	0.025975
piR-56769	GXN_561032	piR-hsa-19925	183.625	1.72003	0.532021	3.23302	0.00122489	0.0266857
piR-59293	GXN_563752	piR-hsa-22415	224.3	-1.15574	0.35717	-3.23583	0.00121289	0.0266857
piR-61330	GXN_567095	piR-hsa-25479	36.9747	-1.70594	0.52765	-3.2331	0.00122455	0.0266857
piR-40903	GXN_542718	piR-hsa-3115	69.8422	1.35922	0.422172	3.21958	0.00128381	0.0276018
piR-59426	GXN_563898	piR-hsa-22548	39.3258	-1.17967	0.36647	-3.21902	0.00128628	0.0276018
piR-47184	GXN_549544	piR-hsa-9384	30.2637	1.25319	0.389733	3.21551	0.00130212	0.0276068
piR-47780	GXN_550126	piR-hsa-9923	304.154	2.26513	0.704619	3.21469	0.00130586	0.0276068
piR-49111	GXN_551658	piR-hsa-11328	3911.32	1.67104	0.520553	3.21012	0.00132678	0.0276397
piR-33465	GXN_565061	piR-hsa-23616	121.505	1.45552	0.453147	3.21201	0.00131808	0.0276397
piR-38897	GXN_573245	piR-hsa-31117	83.4665	-1.63361	0.510698	-3.19877	0.00138015	0.0285432
piR-43264	GXN_545245	piR-hsa-5444	29.9959	1.25737	0.394613	3.18633	0.0014409	0.0291654
piR-58982	GXN_563429	piR-hsa-22118	40.1043	1.60488	0.503144	3.1897	0.0014242	0.0291654
piR-38801	GXN_573139	piR-hsa-31021	41.696	1.44759	0.454076	3.188	0.00143262	0.0291654
piR-49838	GXN_552360	piR-hsa-11980	38.9558	1.74718	0.548796	3.18366	0.00145425	0.0292284
piR-33052	GXN_564625	piR-hsa-23218	2904.43	1.48096	0.465999	3.17804	0.00148273	0.0295924
piR-43301	GXN_545286	piR-hsa-5481	42.9623	1.30125	0.409845	3.17498	0.00149849	0.0296993
piR-31013	GXN_540590	piR-hsa-1152	153.515	1.68832	0.532596	3.16999	0.00152447	0.0299153
piR-40852	GXN_542662	piR-hsa-3064	141.889	1.46941	0.46373	3.16868	0.00153132	0.0299153
piR-53423	GXN_557306	piR-hsa-16532	36.057	1.20446	0.38033	3.16688	0.00154084	0.0299153
piR-43371	GXN_545361	piR-hsa-5551	139.985	1.24521	0.393598	3.16366	0.00155801	0.0300443
piR-43372	GXN_545362	piR-hsa-5552	139.956	1.24583	0.394668	3.15666	0.00159587	0.0302548
piR-49696	GXN_552238	piR-hsa-11868	389.088	1.23992	0.392904	3.15577	0.00160073	0.0302548
piR-51744	GXN_555599	piR-hsa-14957	92.0651	1.41512	0.44809	3.15812	0.0015879	0.0302548
piR-32680	GXN_553242	piR-hsa-12791	34.809	1.45961	0.463434	3.14956	0.00163514	0.030578
piR-51979	GXN_555855	piR-hsa-15192	39.9848	2.06583	0.656063	3.14883	0.00163926	0.030578
piR-38459	GXN_572662	piR-hsa-30593	1325.72	1.25611	0.399301	3.14576	0.00165655	0.0307
piR-35415	GXN_569446	piR-hsa-27624	1176.19	1.30752	0.415908	3.14376	0.0016679	0.0307108
piR-55615	GXN_559811	piR-hsa-18815	51.1132	1.46377	0.467163	3.13333	0.00172837	0.0316203
piR-42265	GXN_544135	piR-hsa-4415	147.087	1.23158	0.394149	3.12465	0.00178014	0.0319529
piR-60479	GXN_566137	piR-hsa-24601	205.449	1.21258	0.387903	3.12598	0.00177211	0.0319529
piR-36326	GXN_570373	piR-hsa-28475	862.781	1.2747	0.407745	3.12622	0.00177071	0.0319529
piR-32824	GXN_553511	piR-hsa-13035	73.631	-1.45519	0.466254	-3.12103	0.00180222	0.0321472
piR-33045	GXN_564617	piR-hsa-23211	11182.3	1.55679	0.500832	3.1084	0.00188102	0.0333443
piR-53177	GXN_557068	piR-hsa-16315	44.366	-1.221	0.393344	-3.10415	0.00190828	0.0335422
piR-60610	GXN_566264	piR-hsa-24717	123.087	1.55933	0.502522	3.103	0.00191569	0.0335422
piR-42027	GXN_543892	piR-hsa-4192	247.457	-0.92633	0.298922	-3.0989	0.00194242	0.0336396
piR-57089	GXN_561368	piR-hsa-20230	28.9328	1.54586	0.498902	3.09853	0.00194483	0.0336396
piR-36260	GXN_570301	piR-hsa-28409	25.3269	-1.24412	0.401815	-3.09626	0.0019598	0.0336944
piR-33162	GXN_564745	piR-hsa-23328	158.034	1.36869	0.442779	3.09115	0.00199384	0.0340744
piR-52425	GXN_556322	piR-hsa-15624	27.0662	1.58803	0.514218	3.08824	0.00201347	0.034205
piR-61896	GXN_567681	piR-hsa-26016	259.337	1.20246	0.390774	3.07713	0.00209001	0.0352953
piR-40834	GXN_542642	piR-hsa-3046	34.9108	-1.12469	0.365916	-3.07363	0.00211473	0.0354251
piR-58055	GXN_562450	piR-hsa-21222	86.4083	1.58282	0.515187	3.07232	0.00212399	0.0354251
piR-39858	GXN_574222	piR-hsa-32016	25.9047	-1.37823	0.448821	-3.07079	0.00213494	0.0354251
piR-31115	GXN_540700	piR-hsa-1254	7998.29	-1.21817	0.397683	-3.06316	0.0021901	0.0361304
piR-52471	GXN_556371	piR-hsa-15670	65.9668	-1.30865	0.427813	-3.05892	0.00222134	0.0364351
piR-31469	GXN_541162	piR-hsa-1680	305.884	1.46512	0.480941	3.04636	0.00231628	0.0375884
piR-48667	GXN_551067	piR-hsa-10781	140.917	1.48938	0.48894	3.04614	0.002318	0.0375884
piR-54235	GXN_557414	piR-hsa-16631	79.449	1.27474	0.419345	3.03983	0.00236712	0.0379536
piR-37623	GXN_571824	piR-hsa-29814	35.6603	1.10159	0.362344	3.04019	0.0023643	0.0379536
piR-43343	GXN_545332	piR-hsa-5523	33.0539	1.19856	0.395908	3.02738	0.00246687	0.0388129
piR-45826	GXN_548009	piR-hsa-7973	56.3936	1.48419	0.490418	3.02637	0.0024751	0.0388129
piR-60674	GXN_566334	piR-hsa-24781	73.1806	1.53281	0.506182	3.02817	0.00246039	0.0388129
piR-61555	GXN_567325	piR-hsa-25690	36.9333	1.43411	0.473108	3.03125	0.0024354	0.0388129
piR-43849	GXN_545867	piR-hsa-6015	37.0552	1.61221	0.533161	3.02387	0.00249567	0.0389215
piR-43959	GXN_545986	piR-hsa-6125	30272.2	1.67226	0.553338	3.02213	0.00251	0.0389323
piR-31537	GXN_541237	piR-hsa-1748	166.003	-1.19997	0.397786	-3.01662	0.00255613	0.039088
piR-45858	GXN_548044	piR-hsa-8005	47.9837	-1.20959	0.401055	-3.01602	0.00256113	0.039088
piR-34808	GXN_568700	piR-hsa-26944	495.993	1.57599	0.522326	3.01724	0.00255084	0.039088
piR-30571	GXN_540142	piR-hsa-739	35.8997	1.2749	0.424701	3.00187	0.00268326	0.0396789
piR-41491	GXN_543327	piR-hsa-3672	41.8859	1.4751	0.490244	3.00892	0.00262176	0.0396789
piR-42548	GXN_544413	piR-hsa-4669	72.0488	1.0938	0.364344	3.0021	0.00268124	0.0396789
piR-51187	GXN_554898	piR-hsa-14311	85.0781	-1.49243	0.496727	-3.00452	0.00265999	0.0396789
piR-33442	GXN_565036	piR-hsa-23593	98.3427	1.38308	0.459939	3.00709	0.00263765	0.0396789
piR-39778	GXN_574135	piR-hsa-31936	28.8132	-1.64383	0.547552	-3.00215	0.00268084	0.0396789
piR-41504	GXN_543340	piR-hsa-3685	147.345	1.14606	0.382723	2.9945	0.00274897	0.0402582
piR-42934	GXN_544939	piR-hsa-5157	30.1479	1.16342	0.388545	2.99431	0.00275065	0.0402582
piR-59804	GXN_564385	piR-hsa-22999	107.542	-0.897743	0.300289	-2.9896	0.00279343	0.0406757
piR-42266	GXN_544136	piR-hsa-4416	146.363	1.16719	0.391498	2.98134	0.00286988	0.0413669
piR-54382	GXN_558428	piR-hsa-17561	57.1996	-1.02065	0.342323	-2.98154	0.00286803	0.0413669
piR-51428	GXN_555145	piR-hsa-14538	25.6983	1.50108	0.504266	2.97676	0.00291316	0.0417797
piR-36241	GXN_570280	piR-hsa-28390	1059.14	1.24103	0.417735	2.97085	0.00296978	0.0423787
piR-33415	GXN_565007	piR-hsa-23566	2729.08	1.03695	0.349431	2.96752	0.00300209	0.0424157
piR-36511	GXN_570558	piR-hsa-28646	166.002	-1.49627	0.504085	-2.96828	0.00299471	0.0424157
piR-35407	GXN_569437	piR-hsa-27616	190.539	-0.831584	0.28095	-2.9599	0.00307735	0.0432648
piR-42563	GXN_544430	piR-hsa-4684	37.6622	-0.982954	0.332652	-2.95491	0.00312764	0.0435429
piR-33863	GXN_565481	piR-hsa-23999	31.2604	-1.25802	0.425637	-2.95561	0.00312048	0.0435429
piR-40964	GXN_542783	piR-hsa-3175	63.2799	1.60461	0.544736	2.94567	0.00322261	0.0446472
piR-44821	GXN_546989	piR-hsa-7045	336.466	1.62855	0.553537	2.94208	0.00326013	0.0449488
piR-43152	GXN_545141	piR-hsa-5346	26.4055	1.39306	0.475137	2.9319	0.00336891	0.0460041
piR-46596	GXN_548833	piR-hsa-8725	39.4962	1.0497	0.357953	2.93252	0.00336226	0.0460041
piR-43131	GXN_545120	piR-hsa-5325	27.1193	1.20444	0.41202	2.92325	0.003464	0.0464522
piR-47310	GXN_549665	piR-hsa-9496	309.935	1.31913	0.451026	2.92472	0.00344767	0.0464522
piR-52429	GXN_556326	piR-hsa-15628	96.0951	1.23016	0.420856	2.92299	0.00346683	0.0464522
piR-61504	GXN_567285	piR-hsa-25653	25.3722	-1.56631	0.535535	-2.92475	0.00344731	0.0464522
piR-30180	GXN_539437	piR-hsa-157	37.4201	-1.57873	0.5412	-2.91709	0.0035331	0.0466827
piR-51107	GXN_554811	piR-hsa-14231	279.169	1.42007	0.486667	2.91794	0.00352347	0.0466827
piR-58485	GXN_562905	piR-hsa-21638	97.4411	-2.02561	0.694351	-2.91727	0.00353111	0.0466827
piR-41895	GXN_543751	piR-hsa-4062	38.6605	1.1689	0.400928	2.91548	0.00355137	0.0467078
piR-33466	GXN_565062	piR-hsa-23617	7871.96	1.3712	0.471101	2.91064	0.00360691	0.0472207
piR-43970	GXN_544675	piR-hsa-4912	58.1065	-1.34123	0.46173	-2.90478	0.00367506	0.0476735
piR-56337	GXN_560573	piR-hsa-19507	48.4311	1.36577	0.470332	2.90383	0.00368626	0.0476735
piR-36196	GXN_570232	piR-hsa-28345	37.4579	-1.08623	0.374128	-2.90338	0.0036916	0.0476735
piR-30924	GXN_540512	piR-hsa-1077	105.785	-1.2978	0.447222	-2.90191	0.00370893	0.0476815
piR-33214	GXN_564802	piR-hsa-23380	25.5732	1.30448	0.450045	2.89856	0.00374878	0.0479777
piR-49447	GXN_551985	piR-hsa-11635	26.1374	1.23741	0.427345	2.89558	0.00378457	0.048098
piR-53553	GXN_557559	piR-hsa-16761	298.145	1.32092	0.456458	2.89385	0.00380553	0.048098
piR-36262	GXN_570303	piR-hsa-28411	690.454	1.65388	0.571569	2.89358	0.00380874	0.048098
piR-42291	GXN_544164	piR-hsa-4441	48.8738	1.19739	0.414053	2.89187	0.00382956	0.0481478
piR-45049	GXN_547222	piR-hsa-7258	56.1205	1.35843	0.471989	2.87809	0.00400086	0.0498622
piR-55735	GXN_559943	piR-hsa-18934	94.5277	0.942059	0.32732	2.8781	0.00400078	0.0498622
piR-54737	GXN_557438	piR-hsa-16653	69.216	1.39414	0.484666	2.8765	0.00402116	0.0498974
piR-54967	GXN_559051	piR-hsa-18131	37.5746	1.16057	0.403959	2.87299	0.00406607	0.0500197
piR-33728	GXN_565332	piR-hsa-23864	55.5251	1.15956	0.40354	2.87346	0.00405997	0.0500197
piR-47811	GXN_550161	piR-hsa-9954	53.4587	1.23671	0.430854	2.87037	0.00409998	0.0502203
piR-30438	GXN_539465	piR-hsa-182	1056.73	-1.09597	0.382678	-2.86394	0.00418408	0.050599
piR-59980	GXN_564578	piR-hsa-23175	954.514	1.52631	0.532708	2.86519	0.00416763	0.050599
piR-35750	GXN_569761	piR-hsa-27914	434.787	1.37129	0.4788	2.86401	0.00418317	0.050599
piR-55177	GXN_559250	piR-hsa-18312	47.0931	1.01742	0.355629	2.86091	0.0042243	0.0508698
piR-31368	GXN_541070	piR-hsa-1593	60.985	1.42752	0.500262	2.85355	0.00432337	0.0510512
piR-53156	GXN_557045	piR-hsa-16294	54.1482	-1.16174	0.406917	-2.85497	0.00430414	0.0510512
piR-53919	GXN_557940	piR-hsa-17113	189.038	1.18451	0.415108	2.85351	0.00432397	0.0510512
piR-36063	GXN_570086	piR-hsa-28212	629.586	-1.07641	0.37727	-2.85315	0.0043288	0.0510512
piR-39268	GXN_573633	piR-hsa-31472	1252.96	1.57573	0.551634	2.85648	0.00428373	0.0510512
piR-57195	GXN_561482	piR-hsa-20336	152.732	-1.54788	0.543156	-2.84978	0.00437491	0.0513827
piR-30456	GXN_540017	piR-hsa-624	1668.86	1.16983	0.411081	2.84574	0.00443081	0.0518259
piR-38023	GXN_572208	piR-hsa-30171	39.5748	-1.13106	0.397782	-2.84343	0.00446311	0.0519907
piR-42412	GXN_544296	piR-hsa-4562	39.2276	1.06504	0.374951	2.84049	0.0045044	0.0522584
piR-46908	GXN_549154	piR-hsa-9023	3702.62	-1.19991	0.423041	-2.83639	0.00456264	0.0525749
piR-34911	GXN_568813	piR-hsa-27047	67.1512	-0.917812	0.323631	-2.83598	0.00456853	0.0525749
piR-55773	GXN_559969	piR-hsa-18958	30.8259	1.26079	0.444839	2.83426	0.00459324	0.0526471
piR-32512	GXN_553059	piR-hsa-12623	842.26	-0.925523	0.327466	-2.82632	0.00470863	0.0533744
piR-32590	GXN_553143	piR-hsa-12701	88.2885	0.994441	0.351885	2.82604	0.0047128	0.0533744
piR-34156	GXN_568018	piR-hsa-26322	35.8496	-1.14986	0.406542	-2.8284	0.0046782	0.0533744
piR-50437	GXN_554158	piR-hsa-13634	102.352	-0.885062	0.313974	-2.81891	0.00481876	0.0541446
piR-34444	GXN_568316	piR-hsa-26594	42.1155	1.20334	0.426746	2.81982	0.00480512	0.0541446
piR-44345	GXN_546394	piR-hsa-6496	33.7665	-1.1781	0.419047	-2.81139	0.00493279	0.0547639
piR-49396	GXN_551932	piR-hsa-11584	56.1557	1.64525	0.585451	2.81023	0.00495062	0.0547639
piR-52639	GXN_556535	piR-hsa-15823	44.4906	1.23361	0.438737	2.81174	0.0049275	0.0547639
piR-53938	GXN_557961	piR-hsa-17132	166.94	0.996358	0.354371	2.81163	0.00492914	0.0547639
piR-38739	GXN_573072	piR-hsa-30961	25.1904	1.41685	0.506277	2.79857	0.00513292	0.0565613
piR-50688	GXN_554398	piR-hsa-13856	26.0961	0.957755	0.342526	2.79615	0.00517149	0.0567671
piR-33081	GXN_564657	piR-hsa-23247	4300.41	1.23465	0.442109	2.79263	0.00522809	0.0571685
piR-55706	GXN_559911	piR-hsa-18905	267.5	-1.21452	0.435282	-2.79019	0.00526773	0.057382
piR-48539	GXN_550926	piR-hsa-10653	67.7738	-1.23267	0.442453	-2.78599	0.00533645	0.0574726
piR-54600	GXN_558664	piR-hsa-17778	26.9448	1.2316	0.441949	2.78675	0.00532391	0.0574726
piR-60438	GXN_566092	piR-hsa-24560	161.809	1.20616	0.432582	2.78828	0.00529891	0.0574726
piR-48032	GXN_550386	piR-hsa-10160	40.3409	1.23762	0.444756	2.78271	0.00539074	0.057839
piR-41382	GXN_543210	piR-hsa-3563	65.2748	-1.59787	0.575005	-2.77888	0.0054546	0.0580109
piR-41406	GXN_543236	piR-hsa-3587	33.2265	-1.0049	0.361784	-2.77761	0.00547599	0.0580109
piR-54290	GXN_558327	piR-hsa-17469	541.03	1.53899	0.554324	2.77633	0.00549758	0.0580109
piR-58953	GXN_563398	piR-hsa-22089	108.327	1.31435	0.473522	2.77569	0.00550839	0.0580109
piR-38322	GXN_572515	piR-hsa-30456	58.061	0.920069	0.331271	2.77739	0.00547978	0.0580109
piR-33373	GXN_564961	piR-hsa-23524	268.859	1.26524	0.456105	2.774	0.00553709	0.0580987
piR-42434	GXN_544320	piR-hsa-4584	65.6706	1.2119	0.437655	2.76907	0.00562161	0.0587695
piR-42264	GXN_544134	piR-hsa-4414	249.53	1.0683	0.386333	2.76522	0.00568836	0.0592503
piR-40408	GXN_542100	piR-hsa-2547	115.612	-1.45407	0.527343	-2.75735	0.00582728	0.0599834
piR-42419	GXN_544303	piR-hsa-4569	1289.84	1.56046	0.566107	2.75647	0.00584281	0.0599834
piR-44959	GXN_547140	piR-hsa-7183	1556.56	1.40947	0.510833	2.75916	0.00579493	0.0599834
piR-53640	GXN_557653	piR-hsa-16848	240.966	1.2147	0.440352	2.75847	0.00580724	0.0599834
piR-57142	GXN_561427	piR-hsa-20283	47.7058	-1.19365	0.433323	-2.75464	0.00587562	0.060104
piR-49799	GXN_552318	piR-hsa-11941	5787	1.45464	0.529475	2.74732	0.00600837	0.0610776
piR-34959	GXN_568866	piR-hsa-27095	94.4706	1.77036	0.644461	2.74704	0.0060136	0.0610776
piR-31052	GXN_540632	piR-hsa-1191	1022.62	-0.985013	0.35964	-2.73888	0.00616483	0.0621712
piR-35171	GXN_569194	piR-hsa-27395	76.8279	-1.80392	0.658458	-2.73961	0.00615126	0.0621712
piR-43918	GXN_545941	piR-hsa-6084	90.9996	1.34123	0.490157	2.73633	0.00621293	0.0622165
piR-49333	GXN_551864	piR-hsa-11521	141.247	1.47311	0.538165	2.73728	0.00619488	0.0622165
piR-43939	GXN_545964	piR-hsa-6105	149.865	-0.88978	0.325452	-2.73398	0.00625739	0.0622252
piR-33221	GXN_564810	piR-hsa-23387	137.47	-1.02312	0.374223	-2.73398	0.0062574	0.0622252
piR-52181	GXN_556061	piR-hsa-15380	436.897	-0.745121	0.272949	-2.72989	0.00633557	0.0627837
piR-30030	GXN_539604	piR-hsa-242	29.5164	-1.40412	0.514572	-2.72871	0.00635832	0.0627912
piR-43773	GXN_545784	piR-hsa-5939	2641.25	1.23668	0.453475	2.72711	0.00638908	0.0628774
piR-43912	GXN_545935	piR-hsa-6078	120.839	1.25512	0.460802	2.72377	0.00645412	0.0630824
piR-34608	GXN_568496	piR-hsa-26758	429.281	-1.11532	0.409376	-2.72443	0.0064413	0.0630824
piR-50587	GXN_554290	piR-hsa-13755	869.966	1.30781	0.48035	2.72262	0.00647659	0.063086
piR-30846	GXN_540427	piR-hsa-999	1268.56	1.47953	0.543696	2.72125	0.00650351	0.0631327
piR-43835	GXN_545852	piR-hsa-6001	39.2159	1.5778	0.580799	2.7166	0.0065957	0.0637379
piR-33247	GXN_564838	piR-hsa-23413	112.915	1.41128	0.519645	2.71585	0.00661052	0.0637379
piR-41457	GXN_543292	piR-hsa-3638	76.7201	1.18538	0.436789	2.71384	0.00665083	0.0639107
piR-41405	GXN_543235	piR-hsa-3586	98.0321	-1.11077	0.409619	-2.71171	0.00669366	0.0640911
piR-44362	GXN_546412	piR-hsa-6513	151.007	1.16224	0.429303	2.70727	0.00678392	0.0640911
piR-48599	GXN_550992	piR-hsa-10713	38.6333	0.977692	0.361151	2.70716	0.00678617	0.0640911
piR-51010	GXN_554704	piR-hsa-14135	27.2706	1.08901	0.402564	2.70518	0.0068268	0.0640911
piR-56435	GXN_560681	piR-hsa-19605	25.515	-1.3452	0.496735	-2.70809	0.00676715	0.0640911
piR-33423	GXN_565015	piR-hsa-23574	2163.08	1.12594	0.416206	2.70525	0.0068252	0.0640911
piR-37979	GXN_571141	piR-hsa-29181	69.6162	0.977217	0.360747	2.70887	0.00675129	0.0640911
piR-42449	GXN_542500	piR-hsa-2915	38.066	1.1554	0.42805	2.69923	0.00695011	0.0650348
piR-56501	GXN_559635	piR-hsa-18657	331.142	-0.902081	0.334445	-2.69725	0.00699154	0.0652087
piR-42486	GXN_544345	piR-hsa-4607	37.4501	1.1638	0.432257	2.69239	0.00709427	0.0657372
piR-59547	GXN_563998	piR-hsa-22640	25.3054	1.29266	0.480112	2.69242	0.00709366	0.0657372
piR-33774	GXN_565383	piR-hsa-23910	28.2777	-1.22439	0.455274	-2.68936	0.00715896	0.0661219
piR-50618	GXN_554322	piR-hsa-13786	68.8947	0.964808	0.359195	2.68603	0.00723069	0.066569
piR-49469	GXN_552009	piR-hsa-11657	13713.7	1.29837	0.484257	2.68115	0.00733696	0.0673301
piR-30859	GXN_540441	piR-hsa-1012	25.852	1.18887	0.4438	2.67885	0.00738744	0.0675762
piR-57140	GXN_561424	piR-hsa-20281	93.6628	-1.0904	0.40793	-2.673	0.00751756	0.0685467
piR-34597	GXN_568484	piR-hsa-26747	416.546	-1.23019	0.461301	-2.66678	0.00765822	0.0696068
piR-31802	GXN_541491	piR-hsa-1984	26.9684	1.17659	0.442243	2.66051	0.00780218	0.0700761
piR-31985	GXN_541674	piR-hsa-2153	1661.23	-1.14539	0.430303	-2.66182	0.00777199	0.0700761
piR-42112	GXN_543986	piR-hsa-4277	39.0563	0.955827	0.359134	2.66148	0.0077799	0.0700761
piR-43913	GXN_545936	piR-hsa-6079	246.55	1.268	0.476648	2.66025	0.00780836	0.0700761
piR-35468	GXN_568914	piR-hsa-27139	144.474	1.22257	0.459752	2.6592	0.00783261	0.0700761
piR-44610	GXN_546661	piR-hsa-6746	35.5622	-0.890096	0.335492	-2.65311	0.00797546	0.0711311
piR-48442	GXN_550836	piR-hsa-10570	115.15	-1.82838	0.690347	-2.6485	0.00808504	0.0716605
piR-51824	GXN_555687	piR-hsa-15037	41.3457	1.50697	0.568781	2.64948	0.00806158	0.0716605
piR-53274	GXN_557143	piR-hsa-16383	58.2911	0.999319	0.377617	2.64638	0.00813573	0.0717602
piR-55164	GXN_559236	piR-hsa-18299	31.334	0.916034	0.346205	2.64593	0.00814657	0.0717602
piR-42796	GXN_544790	piR-hsa-5019	813.913	1.39569	0.528041	2.64316	0.00821372	0.0718146
piR-42907	GXN_544909	piR-hsa-5130	103.542	1.14058	0.431789	2.64152	0.00825339	0.0718146
piR-58349	GXN_562756	piR-hsa-21502	316.709	-1.7705	0.670062	-2.6423	0.00823459	0.0718146
piR-36629	GXN_570687	piR-hsa-28763	281.88	1.54804	0.585408	2.64438	0.00818396	0.0718146
piR-38276	GXN_572465	piR-hsa-30410	154.132	1.2392	0.469351	2.64024	0.00828485	0.0718692
piR-40827	GXN_542634	piR-hsa-3039	30.4518	1.16362	0.443277	2.62505	0.00866361	0.0723483
piR-40851	GXN_542661	piR-hsa-3063	1797.18	1.52959	0.584524	2.61681	0.00887548	0.0723483
piR-41626	GXN_543472	piR-hsa-3807	25.576	1.37805	0.526448	2.61765	0.00885382	0.0723483
piR-42448	GXN_544335	piR-hsa-4598	193.826	1.08681	0.414419	2.62248	0.00872917	0.0723483
piR-42496	GXN_544356	piR-hsa-4617	31.7011	1.2738	0.484846	2.62723	0.00860832	0.0723483
piR-43859	GXN_545878	piR-hsa-6025	35.1357	1.1159	0.423714	2.63362	0.008448	0.0723483
piR-43901	GXN_545923	piR-hsa-6067	73.8032	1.02992	0.392349	2.62501	0.00866469	0.0723483
piR-44341	GXN_546390	piR-hsa-6492	35.6002	1.00353	0.381328	2.63166	0.0084968	0.0723483
piR-47161	GXN_549519	piR-hsa-9361	1209.67	1.11583	0.423977	2.63181	0.00849314	0.0723483
piR-32233	GXN_551506	piR-hsa-11185	31.2673	-1.70375	0.648745	-2.62623	0.00863369	0.0723483
piR-51488	GXN_555211	piR-hsa-14598	40.7609	1.21059	0.46207	2.61992	0.00879504	0.0723483
piR-51903	GXN_555772	piR-hsa-15116	26.4494	0.977966	0.373846	2.61596	0.00889778	0.0723483
piR-55021	GXN_559079	piR-hsa-18156	4262.47	0.95053	0.362919	2.61912	0.00881562	0.0723483
piR-56405	GXN_560648	piR-hsa-19575	38.1647	1.09757	0.418716	2.62128	0.00876001	0.0723483
piR-56831	GXN_561101	piR-hsa-19987	1666.33	-1.33836	0.511212	-2.61801	0.00884434	0.0723483
piR-57816	GXN_562205	piR-hsa-21000	357.077	-0.839874	0.320357	-2.62168	0.00874973	0.0723483
piR-58239	GXN_562651	piR-hsa-21406	334.728	1.71698	0.653988	2.6254	0.00865474	0.0723483
piR-34896	GXN_568797	piR-hsa-27032	313.524	-0.97693	0.37065	-2.63572	0.00839585	0.0723483
piR-35247	GXN_569262	piR-hsa-27456	46.6328	1.30001	0.495547	2.62339	0.00870596	0.0723483
piR-35583	GXN_569596	piR-hsa-27763	660.118	0.938851	0.356831	2.63108	0.00851147	0.0723483
piR-36263	GXN_570304	piR-hsa-28412	30.5203	0.949915	0.363028	2.61665	0.0088798	0.0723483
piR-39875	GXN_574240	piR-hsa-32033	4730.66	-1.40074	0.532287	-2.63154	0.00849984	0.0723483
piR-43238	GXN_545218	piR-hsa-5418	25.3444	1.10236	0.421906	2.61281	0.00898014	0.0726043
piR-38235	GXN_572422	piR-hsa-30369	1355.71	1.24866	0.477873	2.61295	0.00897651	0.0726043
piR-45744	GXN_547920	piR-hsa-7891	49.2075	-1.03085	0.395402	-2.6071	0.00913115	0.0736167
piR-54998	GXN_557469	piR-hsa-16681	311.925	-0.952701	0.365758	-2.60473	0.00919465	0.0739198
piR-55137	GXN_559206	piR-hsa-18272	90.2476	-1.1286	0.433872	-2.60123	0.0092889	0.0744678
piR-34106	GXN_567963	piR-hsa-26272	73.9926	-1.00305	0.385761	-2.60018	0.00931739	0.0744869
piR-50546	GXN_554245	piR-hsa-13714	109.426	-0.923352	0.355508	-2.59727	0.00939676	0.0747029
piR-36611	GXN_570667	piR-hsa-28746	37.5564	-1.01392	0.390365	-2.59736	0.0093944	0.0747029
piR-55025	GXN_559083	piR-hsa-18160	8254.57	1.33464	0.514783	2.59262	0.00952492	0.0755114
piR-39365	GXN_573737	piR-hsa-31569	79.0059	-1.55558	0.600274	-2.59145	0.00955733	0.0755585
piR-53840	GXN_557854	piR-hsa-17034	62.7523	1.20353	0.464824	2.58922	0.00961947	0.0756308
piR-34148	GXN_568009	piR-hsa-26314	43.4627	1.22655	0.473583	2.58994	0.00959926	0.0756308
piR-50239	GXN_553945	piR-hsa-13436	30.12	1.24689	0.481963	2.5871	0.00967875	0.0756799
piR-34950	GXN_568856	piR-hsa-27086	404.599	1.40378	0.542587	2.5872	0.00967588	0.0756799
piR-50444	GXN_554166	piR-hsa-13641	643.466	-1.03352	0.3999	-2.58445	0.0097534	0.0758589
piR-53748	GXN_557406	piR-hsa-16624	199.23	1.21951	0.471875	2.5844	0.00975481	0.0758589
piR-45732	GXN_546855	piR-hsa-6923	50.3877	-0.862452	0.334025	-2.582	0.00982304	0.0759755
piR-36591	GXN_570645	piR-hsa-28726	199.845	1.22648	0.474871	2.58276	0.00980127	0.0759755
piR-45453	GXN_547632	piR-hsa-7631	58.069	0.939209	0.364078	2.57969	0.00988891	0.0761682
piR-32285	GXN_552811	piR-hsa-12397	58.8449	1.14598	0.444305	2.57926	0.00990134	0.0761682
piR-57866	GXN_562260	piR-hsa-21050	361.575	1.71103	0.664095	2.57649	0.00998096	0.0765744
piR-45145	GXN_547326	piR-hsa-7352	38.3454	1.35204	0.525216	2.57426	0.0100454	0.0768622
piR-32937	GXN_553632	piR-hsa-13148	26.1177	-1.09788	0.427227	-2.56979	0.0101759	0.0776526
piR-31264	GXN_540956	piR-hsa-1489	32.4446	1.53109	0.596558	2.56654	0.0102719	0.078176
piR-50143	GXN_553857	piR-hsa-13354	191.813	-1.4759	0.576269	-2.56113	0.0104334	0.0791936
piR-43960	GXN_545987	piR-hsa-6126	6458.74	0.979493	0.382893	2.55813	0.0105235	0.0796662
piR-32904	GXN_553598	piR-hsa-13115	375.645	1.76695	0.691774	2.55424	0.0106421	0.0802067
piR-55156	GXN_559227	piR-hsa-18291	40.7087	-1.22572	0.479931	-2.55394	0.0106511	0.0802067
piR-48887	GXN_551307	piR-hsa-11001	71.9773	1.07417	0.420823	2.55255	0.0106938	0.080313
piR-32286	GXN_552812	piR-hsa-12398	38.49	-0.852831	0.334228	-2.55165	0.0107215	0.080313
piR-36173	GXN_570207	piR-hsa-28322	21817	0.863571	0.338835	2.54865	0.0108142	0.0807948
piR-31589	GXN_541294	piR-hsa-1800	217.887	-0.942778	0.37007	-2.54757	0.0108476	0.0808329
piR-39251	GXN_573614	piR-hsa-31455	194.949	1.16532	0.457658	2.54626	0.0108885	0.0809262
piR-41429	GXN_543261	piR-hsa-3610	29.8895	-1.35616	0.533188	-2.54349	0.010975	0.0811469
piR-55359	GXN_559434	piR-hsa-18480	119.772	-0.984674	0.387075	-2.54388	0.0109628	0.0811469
piR-49204	GXN_551756	piR-hsa-11421	42.5405	-1.0522	0.413869	-2.54235	0.011011	0.0812028
piR-41943	GXN_543802	piR-hsa-4108	93.6158	-0.811042	0.319173	-2.54107	0.0110514	0.0812377
piR-58469	GXN_562887	piR-hsa-21622	2882.66	-0.92051	0.362349	-2.5404	0.0110727	0.0812377
piR-43917	GXN_545940	piR-hsa-6083	34.3872	1.16203	0.457829	2.53814	0.0111445	0.0814198
piR-44133	GXN_546161	piR-hsa-6284	47.4306	-0.964157	0.38005	-2.53692	0.0111831	0.0814198
piR-44910	GXN_547086	piR-hsa-7134	117.09	-1.02495	0.403893	-2.53767	0.0111594	0.0814198
piR-61931	GXN_567720	piR-hsa-26051	97.7198	-1.25161	0.493558	-2.53589	0.0112162	0.0814528
piR-37175	GXN_571389	piR-hsa-29409	71.8759	1.09758	0.432993	2.53486	0.0112492	0.0814857
piR-49459	GXN_551998	piR-hsa-11647	287.22	1.29644	0.51195	2.53236	0.0113296	0.0818601
piR-46867	GXN_549109	piR-hsa-8982	56.8562	-1.24846	0.493369	-2.53048	0.0113907	0.0820937
piR-30513	GXN_540079	piR-hsa-681	57.2918	-0.98648	0.391382	-2.52051	0.0117186	0.0825898
piR-51990	GXN_555235	piR-hsa-14620	37.8764	1.21509	0.481179	2.52524	0.011562	0.0825898
piR-52851	GXN_556730	piR-hsa-16004	219.461	1.26304	0.500553	2.52328	0.0116265	0.0825898
piR-53513	GXN_557515	piR-hsa-16721	53.6888	-1.06713	0.423384	-2.52047	0.01172	0.0825898
piR-53648	GXN_557662	piR-hsa-16856	33.0085	-0.863549	0.342489	-2.52139	0.0116891	0.0825898
piR-55173	GXN_559246	piR-hsa-18308	511.204	1.36308	0.540212	2.52323	0.0116281	0.0825898
piR-56436	GXN_560682	piR-hsa-19606	1328.73	1.45772	0.577842	2.5227	0.0116459	0.0825898
piR-36527	GXN_570576	piR-hsa-28662	28.3781	1.24196	0.492268	2.52293	0.0116381	0.0825898
piR-36587	GXN_570641	piR-hsa-28722	98.7181	1.34113	0.531755	2.52208	0.0116663	0.0825898
piR-46055	GXN_548260	piR-hsa-8202	43.5205	1.43878	0.571682	2.51675	0.0118443	0.0830683
piR-57817	GXN_562206	piR-hsa-21001	125.995	1.48291	0.589228	2.5167	0.0118461	0.0830683
piR-31775	GXN_541462	piR-hsa-1957	123.865	1.26802	0.504615	2.51284	0.0119765	0.0835719
piR-41582	GXN_543425	piR-hsa-3763	39.074	1.0995	0.43741	2.51365	0.0119488	0.0835719
piR-50111	GXN_553823	piR-hsa-13322	50.3797	-1.11664	0.444768	-2.51062	0.012052	0.0838935
piR-53651	GXN_557666	piR-hsa-16859	60.1306	-0.990338	0.394634	-2.50951	0.0120898	0.0839522
piR-46373	GXN_548592	piR-hsa-8505	68.3014	-1.09556	0.436961	-2.50723	0.0121681	0.0842907
piR-45257	GXN_547416	piR-hsa-7435	40.319	-0.972783	0.388322	-2.50509	0.0122419	0.0843926
piR-47376	GXN_549736	piR-hsa-9562	13812.9	1.00291	0.400224	2.50586	0.0122154	0.0843926
piR-47497	GXN_549833	piR-hsa-9654	30.6455	-1.75445	0.700998	-2.50279	0.012322	0.0844897
piR-57236	GXN_559659	piR-hsa-18679	281.725	-1.00681	0.40238	-2.50213	0.0123449	0.0844897
piR-57018	GXN_561290	piR-hsa-20159	26.8944	-1.19302	0.476581	-2.5033	0.0123043	0.0844897
piR-40038	GXN_541732	piR-hsa-2206	39.7856	1.18463	0.473808	2.50024	0.012411	0.0847393
piR-33733	GXN_565338	piR-hsa-23869	140.799	-0.916618	0.368627	-2.48657	0.012898	0.0876452
piR-60140	GXN_565766	piR-hsa-24262	264.138	-0.873479	0.351226	-2.48694	0.0128847	0.0876452
piR-34804	GXN_568695	piR-hsa-26940	249.26	1.26511	0.509412	2.48347	0.0130109	0.0882021
piR-57132	GXN_561416	piR-hsa-20273	81.3553	-0.910895	0.367179	-2.48079	0.0131091	0.0886572
piR-31137	GXN_540723	piR-hsa-1276	37.7047	1.22379	0.493639	2.47912	0.0131708	0.0888551
piR-32031	GXN_552555	piR-hsa-12158	207.149	1.3017	0.525356	2.47774	0.0132216	0.0888551
piR-38473	GXN_572676	piR-hsa-30607	80.3683	-1.34035	0.541018	-2.47747	0.0132318	0.0888551
piR-57141	GXN_561426	piR-hsa-20282	107.037	-0.896305	0.361988	-2.47606	0.0132839	0.088862
piR-37807	GXN_571993	piR-hsa-29969	54.6329	0.953654	0.385195	2.47577	0.013295	0.088862
piR-50902	GXN_554618	piR-hsa-14056	30.5497	1.29191	0.522203	2.47396	0.0133624	0.0891034
piR-48966	GXN_551393	piR-hsa-11080	498.332	-1.17171	0.473895	-2.47251	0.0134169	0.0892585
piR-42571	GXN_544439	piR-hsa-4692	48.8257	0.89246	0.361326	2.46996	0.013513	0.0892733
piR-45680	GXN_547865	piR-hsa-7842	31.4005	-0.802841	0.32503	-2.47005	0.0135093	0.0892733
piR-61945	GXN_567735	piR-hsa-26065	88.6243	-0.824486	0.333798	-2.47001	0.0135109	0.0892733
piR-36041	GXN_570063	piR-hsa-28190	37556.9	-0.971741	0.39376	-2.46785	0.0135927	0.0895928
piR-42526	GXN_544389	piR-hsa-4647	121.544	1.09833	0.445494	2.46543	0.013685	0.0897859
piR-42785	GXN_544778	piR-hsa-5008	23216.9	1.30219	0.528065	2.46597	0.0136641	0.0897859
piR-33528	GXN_565114	piR-hsa-23664	28.3749	1.11964	0.454374	2.46414	0.0137344	0.0899038
piR-30293	GXN_539873	piR-hsa-490	110.105	1.33444	0.542042	2.46188	0.0138209	0.0900569
piR-52541	GXN_556431	piR-hsa-15725	38.7495	1.01844	0.41363	2.4622	0.0138089	0.0900569
piR-30459	GXN_540020	piR-hsa-627	33.8105	1.46339	0.595456	2.4576	0.0139868	0.0903707
piR-43216	GXN_545210	piR-hsa-5410	36.2425	1.08982	0.443606	2.45674	0.0140206	0.0903707
piR-43770	GXN_545780	piR-hsa-5936	25.2784	-1.06558	0.433446	-2.45838	0.0139565	0.0903707
piR-51266	GXN_554968	piR-hsa-14376	50.3658	-0.809255	0.329177	-2.45842	0.0139551	0.0903707
piR-35556	GXN_569567	piR-hsa-27736	50.5321	1.25047	0.509035	2.45656	0.0140274	0.0903707
piR-31109	GXN_540693	piR-hsa-1248	55.2076	-0.873234	0.356231	-2.45131	0.0142337	0.0908138
piR-41617	GXN_543462	piR-hsa-3798	130.91	0.943119	0.384497	2.45286	0.0141725	0.0908138
piR-49293	GXN_551821	piR-hsa-11481	167.451	1.48132	0.604222	2.45162	0.0142216	0.0908138
piR-57975	GXN_562379	piR-hsa-21158	108.317	-1.2732	0.519509	-2.45077	0.0142553	0.0908138
piR-60131	GXN_565757	piR-hsa-24253	34.2998	1.1646	0.475143	2.45105	0.0142442	0.0908138
piR-42124	GXN_543999	piR-hsa-4289	82.4506	1.32381	0.540352	2.44991	0.0142894	0.0908283
piR-33326	GXN_564909	piR-hsa-23477	45.9735	-0.838099	0.342238	-2.44887	0.0143304	0.0908863
piR-50308	GXN_554018	piR-hsa-13505	27.2174	-1.09147	0.446373	-2.4452	0.0144771	0.0916135
piR-32883	GXN_553576	piR-hsa-13094	2758.04	1.12241	0.459302	2.44372	0.0145366	0.0917861
piR-42685	GXN_544562	piR-hsa-4806	42.3643	1.21412	0.498419	2.43594	0.0148534	0.0932693
piR-52287	GXN_556173	piR-hsa-15486	75.4833	1.24843	0.512588	2.43554	0.0148695	0.0932693
piR-34483	GXN_568358	piR-hsa-26633	96.3164	1.08263	0.444329	2.43655	0.0148282	0.0932693
piR-40844	GXN_542653	piR-hsa-3056	64.2743	-1.24885	0.513164	-2.43362	0.0149487	0.093356
piR-54848	GXN_558920	piR-hsa-18012	52.6606	-0.729144	0.299555	-2.43409	0.0149293	0.093356
piR-57988	GXN_562393	piR-hsa-21170	62.3982	1.30174	0.536833	2.42485	0.0153148	0.0954332
piR-46944	GXN_549193	piR-hsa-9059	209.691	-0.993004	0.410192	-2.42083	0.0154852	0.0956597
piR-32414	GXN_552951	piR-hsa-12525	1042.22	-0.898359	0.371087	-2.42088	0.0154828	0.0956597
piR-32795	GXN_553479	piR-hsa-13006	101.116	0.788797	0.325904	2.42033	0.0155063	0.0956597
piR-53088	GXN_556970	piR-hsa-16226	376.057	-1.18507	0.489833	-2.41933	0.015549	0.0956597
piR-33087	GXN_564663	piR-hsa-23253	51.8248	1.11027	0.458311	2.42253	0.0154128	0.0956597
piR-60051	GXN_565671	piR-hsa-24173	70.4024	-1.07687	0.445124	-2.41926	0.0155522	0.0956597
piR-47499	GXN_549835	piR-hsa-9656	30.9113	-1.69415	0.700529	-2.41838	0.0155898	0.0956844
piR-42195	GXN_544076	piR-hsa-4360	35.7803	1.31444	0.543773	2.41726	0.0156379	0.0957737
piR-32746	GXN_553425	piR-hsa-12957	69.9951	0.935865	0.387972	2.4122	0.0158566	0.0969052
piR-33767	GXN_565375	piR-hsa-23903	32.4706	1.0214	0.424101	2.40838	0.0160233	0.0977148
piR-30590	GXN_540162	piR-hsa-758	85.5502	0.748015	0.310941	2.40565	0.0161437	0.0977247
piR-45274	GXN_547435	piR-hsa-7452	66.9612	1.14009	0.473956	2.40549	0.0161508	0.0977247
piR-49219	GXN_551415	piR-hsa-11101	10347.8	1.56004	0.6486	2.40524	0.0161619	0.0977247
piR-53875	GXN_557893	piR-hsa-17069	69.7946	-1.04546	0.434288	-2.4073	0.0160711	0.0977247
piR-41642	GXN_543490	piR-hsa-3823	39.3418	-0.939374	0.391272	-2.40082	0.0163584	0.0980816
piR-42268	GXN_544138	piR-hsa-4418	493.37	1.14587	0.477154	2.40147	0.0163295	0.0980816
piR-46901	GXN_549147	piR-hsa-9016	38.5286	1.06202	0.442107	2.40218	0.0162976	0.0980816
piR-59070	GXN_563525	piR-hsa-22206	182.06	1.42426	0.592752	2.40279	0.0162706	0.0980816
piR-56668	GXN_560921	piR-hsa-19824	120.243	1.40161	0.584246	2.39901	0.0164397	0.0983623
piR-49813	GXN_552334	piR-hsa-11955	56.1885	1.12455	0.468971	2.39791	0.016489	0.0984513
piR-46048	GXN_548252	piR-hsa-8195	230.19	1.38393	0.57737	2.39696	0.0165318	0.0985003
piR-42692	GXN_544570	piR-hsa-4813	25.9731	1.0664	0.447042	2.38546	0.0170577	0.10017
piR-42784	GXN_544777	piR-hsa-5007	253.062	1.03187	0.432418	2.38627	0.0170201	0.10017
piR-42993	GXN_544972	piR-hsa-5187	65.1657	-1.28623	0.538172	-2.39001	0.0168481	0.10017
piR-47841	GXN_550194	piR-hsa-9984	224.27	-1.19788	0.502067	-2.38589	0.0170379	0.10017
piR-60263	GXN_565901	piR-hsa-24385	47.0181	1.24106	0.51963	2.38835	0.0169244	0.10017
piR-34349	GXN_568213	piR-hsa-26499	97.0661	1.39941	0.58655	2.38584	0.0170404	0.10017
piR-37004	GXN_571204	piR-hsa-29238	88.0356	1.11725	0.468143	2.38655	0.0170073	0.10017
piR-44031	GXN_546049	piR-hsa-6182	37.7201	1.44843	0.607647	2.38367	0.0171409	0.100452
piR-52438	GXN_556336	piR-hsa-15637	146.239	1.31918	0.554772	2.37788	0.0174127	0.101628
piR-57583	GXN_561856	piR-hsa-20680	25.4862	-1.05982	0.445576	-2.37855	0.0173808	0.101628
piR-60576	GXN_566227	piR-hsa-24683	148153	-0.816528	0.343743	-2.3754	0.0175298	0.102102
piR-50926	GXN_554644	piR-hsa-14080	42.4932	1.58925	0.669334	2.37438	0.0175786	0.102178
piR-42306	GXN_544180	piR-hsa-4456	122.945	1.23481	0.520801	2.37099	0.0177406	0.102286
piR-44935	GXN_547114	piR-hsa-7159	66.9878	1.31574	0.554876	2.37123	0.0177291	0.102286
piR-50204	GXN_553924	piR-hsa-13415	519.535	1.10919	0.467558	2.3723	0.0176778	0.102286
piR-38537	GXN_572745	piR-hsa-30671	29.7798	1.02666	0.432719	2.37258	0.0176642	0.102286
piR-35917	GXN_569945	piR-hsa-28081	451.111	1.13057	0.477232	2.36902	0.0178351	0.102624
piR-48772	GXN_551183	piR-hsa-10886	117.711	-0.69137	0.292346	-2.3649	0.0180349	0.103356
piR-37546	GXN_571741	piR-hsa-29737	1348.66	1.1374	0.480905	2.36513	0.0180238	0.103356
piR-55133	GXN_559202	piR-hsa-18268	76.2481	0.97566	0.413202	2.36122	0.018215	0.104179
piR-41408	GXN_543238	piR-hsa-3589	452.77	-1.4006	0.593386	-2.36035	0.0182577	0.104215
piR-33359	GXN_564945	piR-hsa-23510	554.702	1.22407	0.518774	2.35955	0.0182971	0.104231
piR-39401	GXN_573776	piR-hsa-31605	99.7241	1.13737	0.482181	2.3588	0.0183339	0.104233
piR-41892	GXN_543748	piR-hsa-4059	31.4356	-0.951329	0.403841	-2.3557	0.0184877	0.104898
piR-39980	GXN_573030	piR-hsa-30937	901.392	-0.63026	0.267894	-2.35265	0.0186402	0.105554
piR-58243	GXN_562656	piR-hsa-21410	937.392	1.31471	0.559224	2.35095	0.0187254	0.105827
piR-34604	GXN_568491	piR-hsa-26754	62.1027	-1.09776	0.467137	-2.34998	0.0187742	0.105893
[truncated: 31,688 more rows]
