# Supplementary material for: Sporadic Parkinson’s disease derived neuronal cells show disease-specific mRNA and small RNA signatures with abundant deregulation of piRNAs
Source: Acta Neuropathol Commun. 2018 Jul 10;6:58. doi: 10.1186/s40478-018-0561-x (PMC6038190; doi:10.1186/s40478-018-0561-x)
Supplement: Supplementary file 12 — Table S7. Differential expression analysis for mRNAs, mature miRNAs and piRNAs/piRNA-like molecules in tissues for the comparison PD vs. CTRL. (XLSX 9950 kb) [file 40478_2018_561_MOESM12_ESM.xlsx]

## Sheet: differentiallyexpressed_mRNAs_t
Symbol	GeneId	ContigAccn	Chromosome	Strand	Start	End	Length	baseMean	log2FoldChange	lfcSE	stat	pvalue	padj
RTP5	285093	NC_000002	chr2	+	241866249	241873823	5203	177.642	0.876515	0.151267	5.79451	6.85228e-09	0.000116427
NELL1	4745	NC_000011	chr11	+	20669551	21575686	5336	775.97	-0.525081	0.103748	-5.0611	4.16845e-07	0.0035413
PRLR	5618	NC_000005	chr5	-	35048756	35230721	13248	30.3185	0.758723	0.153278	4.94999	7.42168e-07	0.00420339
ANKRD13A	88455	NC_000012	chr12	+	109999169	110039763	7367	217.08	-0.463758	0.0999342	-4.64064	3.47334e-06	0.00910358
CDH1	999	NC_000016	chr16	+	68737225	68835548	6021	68.3675	-0.682458	0.147567	-4.62475	3.75052e-06	0.00910358
HLA-H	3136	NC_000006	chr6	+	29887643	29891080	2463	98.8357	0.702302	0.150121	4.67823	2.89367e-06	0.00910358
SERP1	27230	NC_000003	chr3	-	150541993	150603228	5304	242.738	0.43524	0.0927565	4.69229	2.70168e-06	0.00910358
GRID2	2895	NC_000004	chr4	+	92304302	93774556	7691	516.698	0.560106	0.12208	4.58801	4.47486e-06	0.00950404
COX7A1	1346	NC_000019	chr19	-	36150922	36152869	884	145.82	-0.672393	0.148533	-4.52688	5.986e-06	0.0108721
PDLIM5	10611	NC_000004	chr4	+	94451857	94668227	12765	669.381	0.366938	0.081311	4.51277	6.39874e-06	0.0108721
NCALD	83988	NC_000008	chr8	-	101686542	102124907	7143	1702.3	-0.412399	0.0924078	-4.46281	8.08911e-06	0.0124947
CNTNAP4	85445	NC_000016	chr16	+	76277278	76819624	8501	1188.9	-0.392196	0.0885908	-4.42705	9.55306e-06	0.0135263
PPP1R14A	94274	NC_000019	chr19	-	38251237	38256591	777	60.7467	-0.662629	0.153295	-4.32257	1.54222e-05	0.0201569
KCNG1	3755	NC_000020	chr20	-	51003656	51023138	6401	335.311	0.658352	0.153171	4.29813	1.72242e-05	0.020904
C21orf91	54149	NC_000021	chr21	-	17788967	17819386	6235	52.0031	-0.627557	0.148238	-4.23344	2.30145e-05	0.02444
RASL12	51285	NC_000015	chr15	-	65045673	65076690	3125	46.2695	0.626308	0.14768	4.24098	2.22541e-05	0.02444
ALDH1A1	216	NC_000009	chr9	-	72900662	73080442	3110	284.379	-0.643311	0.153342	-4.19526	2.72553e-05	0.0272409
FA2H	79152	NC_000016	chr16	-	74712955	74774831	2937	108.44	-0.616279	0.147684	-4.17297	3.00658e-05	0.0283804
GPC4	2239	NC_000023	chrX	-	133300103	133415490	5057	351.233	0.52001	0.125439	4.14553	3.39032e-05	0.0303184
CARNS1	57571	NC_000011	chr11	+	67415361	67425607	5496	470.736	-0.619916	0.152776	-4.05768	4.95635e-05	0.0362228
ERMN	57471	NC_000002	chr2	-	157318613	157327713	4255	538.624	-0.618158	0.15145	-4.0816	4.47264e-05	0.0362228
GATB	5188	NC_000004	chr4	-	151670504	151761023	13063	709.28	0.395867	0.0980821	4.03608	5.43514e-05	0.0362228
HEATR5A	25938	NC_000014	chr14	-	31291788	31457441	10343	804.672	0.271732	0.0676159	4.01876	5.85041e-05	0.0362228
LRAT	9227	NC_000004	chr4	+	154626945	154753118	7562	25.8305	0.615007	0.153215	4.01402	5.96927e-05	0.0362228
SH3TC2	79628	NC_000005	chr5	-	148923639	149063174	34256	336.433	-0.613533	0.151313	-4.05474	5.0191e-05	0.0362228
ST18	9705	NC_000008	chr8	-	52110832	52460959	13873	256.985	-0.600093	0.14896	-4.02855	5.61211e-05	0.0362228
TTLL7	79739	NC_000001	chr1	-	83865028	83999167	10560	2158.33	-0.27137	0.0668658	-4.05842	4.94054e-05	0.0362228
ZNF34	80778	NC_000008	chr8	-	144772224	144787345	3241	139.663	-0.469694	0.116624	-4.02744	5.63884e-05	0.0362228
GPCPD1	56261	NC_000020	chr20	-	5544434	5611026	8429	205.194	-0.542083	0.135436	-4.00251	6.26753e-05	0.0367212
HLA-DRB6	3128	NC_000006	chr6	-	32552713	32560022	1326	48.6357	0.568436	0.142589	3.98653	6.70475e-05	0.0367485
ONECUT2	9480	NC_000018	chr18	+	57435685	57491298	16235	31.3556	-0.54165	0.135731	-3.99061	6.59031e-05	0.0367485
CNGB1	1258	NC_000016	chr16	-	57882340	57979251	7378	910.172	0.584953	0.147763	3.95873	7.53497e-05	0.0400083
BAIAP3	8938	NC_000016	chr16	+	1333601	1349441	6147	5772.05	0.495418	0.125921	3.93436	8.34181e-05	0.0420526
CYP2A7	1549	NC_000019	chr19	-	40875439	40882752	2583	27.4012	-0.603334	0.153432	-3.93226	8.41498e-05	0.0420526
GABRB1	2560	NC_000004	chr4	+	47031278	47426445	7579	1989.97	0.35973	0.0917816	3.91941	8.87644e-05	0.0430913
CCBE1	147372	NC_000018	chr18	-	59430939	59697838	6945	154.669	0.585299	0.150125	3.89875	9.66913e-05	0.0449824
CNGA3	1261	NC_000002	chr2	+	98346155	98398601	4379	344.831	0.544137	0.141874	3.83534	0.000125388	0.0449824
ENSG00000280315	0	NC_000009	chr9	+	121341347	121348132	180	304.059	0.43735	0.112557	3.88558	0.000102085	0.0449824
FAM86B1	85002	NC_000008	chr8	-	12182098	12194120	3055	70.0586	0.569401	0.146246	3.89346	9.88251e-05	0.0449824
FAM86B1/FAM86B2	0	NC_000008	chr8	-	12182096	12194133	4127	70.2022	0.563652	0.146436	3.84914	0.000118532	0.0449824
KCTD12	115207	NC_000013	chr13	-	76880166	76886405	6240	336.725	0.448457	0.116325	3.8552	0.000115635	0.0449824
KLK6	5653	NC_000019	chr19	-	50958631	50969673	1976	118.917	-0.586195	0.153213	-3.826	0.000130241	0.0449824
MS4A8	83661	NC_000011	chr11	+	60699574	60715811	2395	33.4362	0.578229	0.150604	3.83939	0.000123338	0.0449824
NHSL2	340527	NC_000023	chrX	+	71911088	72147604	9649	546.999	0.547802	0.142771	3.83692	0.000124588	0.0449824
PGAP1	80055	NC_000002	chr2	-	196833004	196927796	13487	610.471	0.480933	0.125568	3.83007	0.000128107	0.0449824
PLEKHH1	57475	NC_000014	chr14	+	67533199	67589612	11703	1731.87	-0.563177	0.147351	-3.822	0.000132371	0.0449824
PNMA5	114824	NC_000023	chrX	-	152988824	152994127	3439	36.6731	0.590605	0.153335	3.85172	0.000117292	0.0449824
RASGRP3	25780	NC_000002	chr2	+	33436324	33564750	11126	111.938	-0.561085	0.146331	-3.83436	0.000125889	0.0449824
SFT2D2	375035	NC_000001	chr1	+	168225938	168253025	11221	391.485	0.491392	0.127109	3.8659	0.00011068	0.0449824
SLCO1A2	6579	NC_000012	chr12	-	21264600	21419594	11568	195.669	-0.563557	0.145862	-3.86362	0.00011172	0.0449824
ANKRD24	170961	NC_000019	chr19	+	4182668	4224814	4848	709.097	-0.458192	0.120944	-3.78848	0.000151573	0.0504489
LY6H	4062	NC_000008	chr8	-	143157914	143160711	2030	653.747	0.452341	0.119544	3.78389	0.000154396	0.0504489
SLC24A2	25769	NC_000009	chr9	-	19507452	19789059	11294	2805.37	-0.533406	0.141706	-3.76419	0.000167093	0.0535674
CREB5	9586	NC_000007	chr7	+	28299321	28825894	11980	607.61	-0.517574	0.138043	-3.74938	0.000177275	0.0551258
DNAJC5G	285126	NC_000002	chr2	+	27275421	27281885	3099	29.4515	-0.568938	0.151809	-3.74773	0.000178443	0.0551258
ANGPT1	284	NC_000008	chr8	-	107249482	107498055	6592	49.5508	0.540173	0.144545	3.73705	0.000186195	0.0564936
OSR1	130497	NC_000002	chr2	-	19351485	19358653	5197	58.7411	0.560682	0.150728	3.71984	0.000199351	0.0594241
FCHO1	23149	NC_000019	chr19	+	17747718	17788568	5451	755.788	-0.360819	0.0974389	-3.70303	0.000213041	0.0613522
KIAA1217	56243	NC_000010	chr10	+	23694746	24547848	15176	1349.08	-0.357924	0.0965805	-3.70596	0.000210591	0.0613522
NR4A2	4929	NC_000002	chr2	-	156324432	156342348	4022	260.782	-0.566383	0.153343	-3.69357	0.000221127	0.0626196
TMEM196	256130	NC_000007	chr7	-	19719310	19773598	4088	37.672	0.56527	0.153237	3.68886	0.000225259	0.0627437
OPALIN	93377	NC_000010	chr10	-	96343216	96359365	5505	79.8581	-0.550066	0.149398	-3.68188	0.000231521	0.063448
CHRNA2	1135	NC_000008	chr8	-	27459761	27479296	4413	152.942	-0.55636	0.151833	-3.66428	0.000248031	0.0668935
KCNQ1	3784	NC_000011	chr11	+	2444991	2849110	3617	80.291	0.530091	0.144838	3.6599	0.000252316	0.0669859
ATP2B2	491	NC_000003	chr3	-	10324023	10708031	10271	10483.7	-0.372697	0.102169	-3.64785	0.00026444	0.0686205
BCAS1	8537	NC_000020	chr20	-	53936777	54070765	9140	2072.9	-0.544561	0.149366	-3.64581	0.00026655	0.0686205
LDB3	11155	NC_000010	chr10	+	86666717	86736072	7269	268.862	-0.519321	0.142735	-3.63837	0.000274368	0.069579
ZNF385B	151126	NC_000002	chr2	-	179441982	179862059	5906	553.604	-0.494607	0.136434	-3.62525	0.000288682	0.0721323
TOX3	27324	NC_000016	chr16	-	52437770	52547802	5214	335.975	0.527738	0.145918	3.61668	0.000298404	0.0734808
CLN3	1201	NC_000016	chr16	-	28456372	28495575	6055	428.4	0.279727	0.0775288	3.60804	0.000308517	0.0748859
SLC7A8	23428	NC_000014	chr14	-	23125295	23183674	5991	353.395	-0.379005	0.105228	-3.60174	0.000316095	0.0756446
CPE	1363	NC_000004	chr4	+	165378942	165498330	2625	8866.15	0.334122	0.0930502	3.59077	0.000329704	0.0764912
FOLH1	2346	NC_000011	chr11	-	49146631	49208670	3578	110.524	-0.549078	0.153116	-3.58602	0.000335758	0.0764912
SLC16A6	9120	NC_000017	chr17	-	68267026	68291267	4082	70.4396	-0.538476	0.149809	-3.59442	0.000325118	0.0764912
STAU2	27067	NC_000008	chr8	-	73420369	73747708	8526	1541.93	-0.252941	0.070564	-3.58457	0.00033764	0.0764912
ANKRD6	22881	NC_000006	chr6	+	89433170	89633834	8515	895.698	0.426057	0.119556	3.56366	0.000365715	0.0774363
AQP4	361	NC_000018	chr18	-	26852038	26865818	5995	11200.1	0.422641	0.118617	3.56307	0.000366547	0.0774363
COCH	1690	NC_000014	chr14	+	30874514	30895079	3637	114.236	0.516667	0.144971	3.56394	0.000365332	0.0774363
HYDIN	54768	NC_000016	chr16	-	70807384	71230722	21437	134.27	0.477731	0.133833	3.5696	0.000357522	0.0774363
TMEM165	55858	NC_000004	chr4	+	55395620	55452458	8607	171.289	-0.386134	0.108428	-3.56121	0.000369156	0.0774363
VCAN	1462	NC_000005	chr5	+	83471465	83582303	14287	4354.5	0.381004	0.106807	3.56721	0.000360806	0.0774363
SGTB	54557	NC_000005	chr5	-	65665928	65723035	5748	896.281	-0.30467	0.0856525	-3.55705	0.000375044	0.0777119
BMPER	168667	NC_000007	chr7	+	33904911	34155872	5888	723.269	-0.411507	0.116224	-3.54064	0.000399158	0.077955
DNAJC12	56521	NC_000010	chr10	-	67796665	67838179	2134	191.168	0.400786	0.112887	3.55034	0.000384736	0.077955
ERBB3	2065	NC_000012	chr12	+	56079857	56103507	8453	634.859	-0.490234	0.138368	-3.54296	0.000395655	0.077955
IRF8	3394	NC_000016	chr16	+	85898803	85922609	3842	164.088	0.462326	0.13049	3.54299	0.000395618	0.077955
NEK3	4752	NC_000013	chr13	-	52132639	52159861	4272	81.0726	-0.496478	0.13996	-3.54729	0.000389211	0.077955
LDLRAP1	26119	NC_000001	chr1	+	25543580	25591211	11899	98.2005	-0.463239	0.130978	-3.53678	0.000405044	0.0782056
IGFBP2	3485	NC_000002	chr2	+	216633395	216664436	4451	90.6388	-0.520692	0.1478	-3.52296	0.000426751	0.0808948
LAMB2	3913	NC_000003	chr3	-	49121114	49133166	6913	1352.13	0.267688	0.0760681	3.51905	0.000433092	0.0808948
TGFB1	7040	NC_000019	chr19	-	41330323	41353933	3003	169.284	0.425035	0.120785	3.51895	0.000433255	0.0808948
DDR2	4921	NC_000001	chr1	+	162631265	162787400	11022	697.355	0.394218	0.112286	3.51085	0.00044667	0.0824932
GPT2	84706	NC_000016	chr16	+	46884378	46931297	10162	1077.34	0.272129	0.0776994	3.50234	0.000461195	0.0833635
VPS37D	155382	NC_000007	chr7	+	73667825	73672112	1626	115.586	0.377016	0.107627	3.50298	0.00046008	0.0833635
NEK5	341676	NC_000013	chr13	-	52033611	52129078	10627	37.0096	0.531732	0.151973	3.49885	0.000467268	0.0835721
PTPN3	5774	NC_000009	chr9	-	109375466	109498320	11581	309.999	-0.417805	0.11951	-3.49597	0.000472339	0.0835991
SCN1B	6324	NC_000019	chr19	+	35030684	35040449	4626	1455.71	-0.521761	0.149742	-3.48441	0.000493226	0.0855142
SERTM1	400120	NC_000013	chr13	+	36673912	36697839	3207	156.513	0.447767	0.128427	3.48656	0.000489283	0.0855142
KCNH8	131096	NC_000003	chr3	+	19148454	19535646	6265	229.659	-0.530364	0.152625	-3.47495	0.000510948	0.0876921
TMEM144	55314	NC_000004	chr4	+	158170752	158255411	12992	514.878	-0.517743	0.14927	-3.46849	0.000523387	0.0889287
CABP1	9478	NC_000012	chr12	+	120640552	120667324	5858	1739.55	-0.385583	0.111286	-3.4648	0.000530631	0.0892668
HPCAL1	3241	NC_000002	chr2	+	10302889	10427617	9853	2384.01	0.487779	0.141678	3.44287	0.000575578	0.094948
INF2	64423	NC_000014	chr14	+	104689606	104722535	9691	5549.99	-0.335228	0.0973367	-3.44401	0.000573165	0.094948
ENSG00000235095	0	NC_000007	chr7	-	57147986	57150347	1980	95.4341	-0.482139	0.140432	-3.43326	0.000596359	0.0974302
CYP2A6	1548	NC_000019	chr19	-	40843538	40882210	2316	70.6144	-0.519674	0.152241	-3.41349	0.00064136	0.0981743
HCN4	10021	NC_000015	chr15	-	73319859	73369264	7228	436.843	0.457313	0.133688	3.42075	0.00062449	0.0981743
KCNK9	51305	NC_000008	chr8	-	139600838	139703056	7458	234.801	-0.377158	0.110146	-3.42416	0.000616713	0.0981743
NIPAL4	348938	NC_000005	chr5	+	157460019	157474722	4432	57.9716	-0.523873	0.153388	-3.41535	0.000637011	0.0981743
RGS4	5999	NC_000001	chr1	+	163068606	163076802	5274	3869.26	-0.333781	0.0974226	-3.42611	0.00061229	0.0981743
SEMA3B	7869	NC_000003	chr3	+	50267558	50277546	5852	417.978	-0.482909	0.141368	-3.41597	0.000635556	0.0981743
TRHR	7201	NC_000008	chr8	+	109086621	109119584	1678	22.6226	0.522284	0.152907	3.4157	0.000636172	0.0981743
DNAJA4	55466	NC_000015	chr15	+	78264086	78282196	6034	1485.35	0.368684	0.108463	3.39916	0.00067592	0.0990048
FZD1	8321	NC_000007	chr7	+	91264364	91271326	6963	84.6287	0.511315	0.150374	3.40028	0.000673166	0.0990048
SHD	56961	NC_000019	chr19	+	4278601	4290724	2811	78.1831	-0.514253	0.151238	-3.4003	0.000673123	0.0990048
SKOR1	390598	NC_000015	chr15	+	67819704	67834561	4479	62.2275	-0.461312	0.135522	-3.40396	0.000664162	0.0990048
STOM	2040	NC_000009	chr9	-	121338988	121370304	3328	2672.84	0.366622	0.107607	3.40705	0.000656698	0.0990048
CPNE3	8895	NC_000008	chr8	+	86484830	86561498	9312	1041.38	0.384792	0.113582	3.3878	0.000704563	0.100728
GALNT6	11226	NC_000012	chr12	-	51351247	51392867	7352	41.6743	-0.520196	0.15342	-3.39066	0.000697233	0.100728
WSCD1	23302	NC_000017	chr17	+	5772234	6124427	8500	156.388	0.45406	0.134042	3.38744	0.00070547	0.100728
DOPEY2	9980	NC_000021	chr21	+	36156782	36294274	9030	1068.31	-0.297696	0.0881343	-3.37775	0.000730815	0.102622
TRPM6	140803	NC_000009	chr9	-	74722495	74888094	9673	137.336	-0.440892	0.130501	-3.37846	0.000728926	0.102622
CLCA4	22802	NC_000001	chr1	+	86547015	86580754	3816	38.247	-0.516799	0.153406	-3.36882	0.000754897	0.105135
EMILIN3	90187	NC_000020	chr20	-	41359966	41366858	3827	50.9568	-0.515018	0.153388	-3.35761	0.000786191	0.108603
SEPT4	5414	NC_000017	chr17	-	58520250	58540818	7957	2801.24	-0.492377	0.147101	-3.34721	0.000816306	0.108709
MOG	4340	NC_000006	chr6	+	29656981	29672372	4295	755.656	-0.511858	0.152655	-3.35303	0.000799309	0.108709
PCSK6	5046	NC_000015	chr15	-	101303928	101525202	10021	301.846	-0.448787	0.134114	-3.34631	0.000818948	0.108709
PIEZO2	63895	NC_000018	chr18	-	10670241	11148762	14986	227.653	-0.474718	0.141619	-3.35209	0.000802047	0.108709
ZFP57	346171	NC_000006	chr6	-	29672392	29681136	2175	91.3788	-0.511858	0.152826	-3.34928	0.000810207	0.108709
CXorf57	55086	NC_000023	chrX	+	106611930	106679443	4885	207.087	0.449774	0.135157	3.32779	0.000875379	0.114412
PLCB3	5331	NC_000011	chr11	+	64251523	64269452	5846	398.123	0.358604	0.107747	3.32821	0.000874068	0.114412
CAPN3	825	NC_000015	chr15	+	42348103	42412318	6211	628.88	-0.457525	0.137701	-3.3226	0.000891841	0.114449
CTNNA3	29119	NC_000010	chr10	-	65912518	67696191	11854	190.313	-0.497032	0.149553	-3.32345	0.000889108	0.114449
PDYN	5173	NC_000020	chr20	-	1978756	1994285	3011	246.466	0.508885	0.153217	3.32134	0.000895867	0.114449
ANGPTL2	23452	NC_000009	chr9	-	127087332	127122883	3889	98.6929	-0.427676	0.12917	-3.31095	0.000929805	0.114598
ARMC3	219681	NC_000010	chr10	+	22928024	23038523	7000	28.4085	0.497694	0.150662	3.30338	0.000955262	0.114598
CHRDL1	91851	NC_000023	chrX	-	110673856	110796058	4159	546.551	0.435613	0.131516	3.31226	0.00092546	0.114598
COL4A5	1287	NC_000023	chrX	+	108439771	108697545	9420	498.889	-0.459847	0.139235	-3.30266	0.000957734	0.114598
FGD2	221472	NC_000006	chr6	+	37005646	37029070	11989	94.0286	0.42895	0.129292	3.31768	0.000907689	0.114598
GLRA3	8001	NC_000004	chr4	-	174636914	174829315	8771	319.962	0.485214	0.146584	3.31015	0.000932458	0.114598
PRKCQ	5588	NC_000010	chr10	-	6393596	6580301	4335	121.651	-0.474265	0.143583	-3.30307	0.000956322	0.114598
TMEM235	283999	NC_000017	chr17	+	78231310	78240987	2874	47.9297	-0.470492	0.142414	-3.30369	0.000954197	0.114598
TRPV5	56302	NC_000007	chr7	-	142908101	142933808	3686	20.5428	-0.487476	0.147304	-3.30931	0.000935262	0.114598
AXL	558	NC_000019	chr19	+	41219199	41261767	5159	1143.26	0.323633	0.0983659	3.2901	0.00100152	0.11663
EDNRA	1909	NC_000004	chr4	+	147480917	147544954	4242	37.3835	-0.490127	0.148978	-3.28992	0.00100217	0.11663
HPSE2	60495	NC_000010	chr10	-	98457077	99235875	4857	87.3927	-0.495782	0.150478	-3.29472	0.000985181	0.11663
NLRP2	55655	NC_000019	chr19	+	54953130	55001142	6467	362.624	-0.50314	0.152894	-3.29078	0.000999089	0.11663
AGTPBP1	23287	NC_000009	chr9	-	85546539	85742029	5322	1324.21	-0.202014	0.0615803	-3.28049	0.00103627	0.117716
KCTD15	79047	NC_000019	chr19	+	33795933	33815763	6153	216.283	0.375159	0.114519	3.27595	0.00105308	0.117716
LRRTM1	347730	NC_000002	chr2	-	80288351	80304749	5044	185.803	0.445815	0.135781	3.28333	0.00102587	0.117716
NNAT	4826	NC_000020	chr20	+	37521205	37523693	1307	164.648	0.468744	0.143082	3.27605	0.00105271	0.117716
PITPNM3	83394	NC_000017	chr17	-	6451263	6556557	10356	4240.51	0.327373	0.0997611	3.28157	0.00103232	0.117716
TMEM139	135932	NC_000007	chr7	+	143279957	143288049	3178	41.1392	-0.498339	0.151991	-3.27874	0.00104272	0.117716
BHLHE22	27319	NC_000008	chr8	+	64580238	64583634	3397	125.441	0.466583	0.142815	3.26705	0.00108675	0.119129
SCN9A	6335	NC_000002	chr2	-	166195185	166375993	10368	641.856	0.491123	0.150305	3.26752	0.00108495	0.119129
UST	10090	NC_000006	chr6	+	148746928	149076990	5119	174.484	-0.403818	0.123494	-3.26994	0.00107569	0.119129
CD9	928	NC_000012	chr12	+	6199715	6238271	5362	245.926	-0.490597	0.150494	-3.25991	0.00111448	0.121385
LOC100131347	100131347	NC_000017	chr17	+	39057019	39113337	4326	175.99	-0.445878	0.137035	-3.25374	0.00113896	0.122241
MTG2	26164	NC_000020	chr20	+	62183025	62203568	5902	568.642	-0.304973	0.0937214	-3.25404	0.00113777	0.122241
PEA15	8682	NC_000001	chr1	+	160205335	160215376	2822	12041.8	0.3816	0.117325	3.25251	0.00114392	0.122241
PCDH20	64881	NC_000013	chr13	-	61409685	61427849	6548	865.57	0.455152	0.140316	3.24377	0.0011796	0.125266
CERCAM	51148	NC_000009	chr9	+	128411575	128437351	6236	812.377	-0.488419	0.151186	-3.23058	0.00123538	0.130375
WDFY4	57705	NC_000010	chr10	+	48684862	48982956	14846	251.439	0.443006	0.137233	3.22814	0.00124598	0.130682
PLXDC1	57125	NC_000017	chr17	-	39063303	39153283	9123	402.177	-0.444197	0.137762	-3.22438	0.00126244	0.131596
HHIP	64399	NC_000004	chr4	+	144645996	144745271	12099	246.241	-0.492309	0.153051	-3.21664	0.00129703	0.134377
ADAMTS18	170692	NC_000016	chr16	-	77282128	77435114	6403	31.3727	-0.436281	0.135764	-3.21353	0.00131116	0.135018
MCOLN3	55283	NC_000001	chr1	-	85018082	85048902	7063	22.5238	0.444026	0.138783	3.19942	0.00137705	0.140949
ADAMTS14	140766	NC_000010	chr10	+	70672803	70762441	6778	51.907	-0.415284	0.130132	-3.19126	0.00141654	0.141653
DIRAS2	54769	NC_000009	chr9	-	90609832	90643104	4385	1569.36	-0.359027	0.112536	-3.19033	0.00142111	0.141653
FBXW7	55294	NC_000004	chr4	-	152321258	152536101	10288	5173.42	-0.187449	0.0586652	-3.19524	0.00139714	0.141653
FFAR4	338557	NC_000010	chr10	+	93566665	93590072	3653	81.1387	0.464071	0.145892	3.18093	0.00146805	0.141653
GABRE	2564	NC_000023	chrX	-	151953124	151974680	9612	82.3847	0.485405	0.152233	3.18856	0.00142985	0.141653
LOC100506071	100506071	NC_000014	chr14	-	30876190	30889673	1845	64.6909	0.475228	0.149441	3.18003	0.0014726	0.141653
MYO16	23026	NC_000013	chr13	+	108596152	109208007	9666	1055.05	0.384944	0.120963	3.18233	0.00146097	0.141653
PHLDB1	23187	NC_000011	chr11	+	118606440	118658038	22838	1588.06	-0.430866	0.135403	-3.1821	0.00146209	0.141653
SOX8	30812	NC_000016	chr16	+	981808	986979	4432	152.758	-0.404534	0.127049	-3.18408	0.00145216	0.141653
TMEM63A	9725	NC_000001	chr1	-	225845532	225882720	15597	527.638	-0.472789	0.148095	-3.19247	0.00141059	0.141653
ZNF831	128611	NC_000020	chr20	+	59146159	59259113	10601	247.263	0.468442	0.147335	3.17943	0.00147563	0.141653
RPH3A	22895	NC_000012	chr12	+	112570380	112898881	10369	3052.8	-0.411623	0.129623	-3.17554	0.00149559	0.142762
MUC5B	727897	NC_000011	chr11	+	1223065	1262176	18371	216.198	-0.483174	0.152921	-3.15963	0.0015797	0.149948
FRYL	285527	NC_000004	chr4	-	48497361	48780312	18152	1679.25	-0.278449	0.0883151	-3.1529	0.00161656	0.152595
HTR3A	3359	NC_000011	chr11	+	113974881	113990313	2772	54.889	0.481872	0.152937	3.1508	0.00162825	0.152848
AK096487	0	NC_000002	chr2	+	101010132	101012625	2494	64.9075	-0.402695	0.127967	-3.14687	0.0016503	0.153225
E2F1	1869	NC_000020	chr20	-	33675486	33686404	2701	102.25	-0.431115	0.136987	-3.14713	0.00164883	0.153225
LRP2	4036	NC_000002	chr2	-	169127109	169362685	16495	514.874	-0.46591	0.148501	-3.13741	0.00170445	0.157393
PLCB1	23236	NC_000020	chr20	+	8114453	8968356	11729	4563.71	-0.368286	0.117651	-3.13033	0.00174608	0.160366
RGS14	10636	NC_000005	chr5	+	177357711	177372601	3923	270.411	0.428173	0.136905	3.12752	0.00176289	0.161039
C5orf49	134121	NC_000005	chr5	-	7830378	7851490	2385	45.2665	0.463675	0.148532	3.12172	0.001798	0.163368
DBNDD2	55861	NC_000020	chr20	+	45363216	45410610	3268	2292	-0.399403	0.128284	-3.11343	0.00184924	0.164505
GABRA3	2556	NC_000023	chrX	-	152166234	152451359	4194	2054.06	0.412765	0.132566	3.11366	0.00184781	0.164505
IPCEF1	26034	NC_000006	chr6	-	154154483	154356792	8696	584.572	-0.376354	0.120862	-3.1139	0.00184631	0.164505
TMEM155	132332	NC_000004	chr4	-	121758930	121765427	3027	53.9234	-0.439145	0.140857	-3.11766	0.00182292	0.164505
TF	7018	NC_000003	chr3	+	133661998	133779006	10692	1571.19	-0.470731	0.1514	-3.10919	0.00187601	0.166017
TMTC4	84899	NC_000013	chr13	-	100603836	100675093	9406	222.649	-0.408841	0.131568	-3.10746	0.001887	0.166124
SAMD12	401474	NC_000008	chr8	-	118189455	118621995	10602	238.719	-0.33007	0.106289	-3.10539	0.00190026	0.16643
PSAT1	29968	NC_000009	chr9	+	78297075	78330093	2256	1100.96	0.357211	0.115309	3.09785	0.0019493	0.169849
EVPL	2125	NC_000017	chr17	-	76004502	76027452	7510	31.5798	-0.469953	0.151927	-3.09327	0.00197961	0.171139
KCNA1	3736	NC_000012	chr12	+	4909905	4931361	8361	697.75	-0.445154	0.143943	-3.09258	0.00198425	0.171139
BANF1	8815	NC_000011	chr11	+	66002079	66004149	1645	494.46	0.281743	0.0912806	3.08656	0.00202485	0.17322
C11orf24	53838	NC_000011	chr11	-	68261335	68272001	2773	367.198	-0.320749	0.104049	-3.08267	0.00205152	0.17322
CALB1	793	NC_000008	chr8	-	90058608	90082879	6624	435.522	0.457787	0.148741	3.07775	0.00208572	0.17322
DDX11L2	84771	NC_000002	chr2	-	113599028	113603717	3266	33.4465	-0.466221	0.151467	-3.07803	0.00208376	0.17322
DNAH17	8632	NC_000017	chr17	-	78423697	78577394	16141	111.446	-0.46068	0.149649	-3.07841	0.00208112	0.17322
KCNH4	23415	NC_000017	chr17	-	42156891	42181278	3924	86.1255	-0.472557	0.153364	-3.08129	0.00206107	0.17322
MYH7B	57644	NC_000020	chr20	+	34955901	35002437	7938	352.677	-0.43614	0.141735	-3.07714	0.00208994	0.17322
ZCCHC12	170261	NC_000023	chrX	+	118823783	118826968	2238	3744.14	0.441347	0.143427	3.07715	0.00208987	0.17322
GNAI2A	0	NC_000012	chr12	+	14254912	14255226	315	33.67	0.454342	0.147825	3.07351	0.00211559	0.174495
SLC45A3	85414	NC_000001	chr1	-	205657851	205680502	5307	30.2072	-0.464037	0.15121	-3.06881	0.0021491	0.176403
C10orf90	118611	NC_000010	chr10	-	126424997	126798708	5880	105.033	-0.46466	0.151741	-3.06219	0.00219723	0.179487
PPFIA4	8497	NC_000001	chr1	+	203026498	203078740	10536	2376.02	-0.362589	0.118485	-3.06021	0.00221178	0.17981
MTAP	4507	NC_000009	chr9	+	21802543	22032986	8313	52.5622	-0.416997	0.136379	-3.05762	0.00223102	0.180511
ABHD5	51099	NC_000003	chr3	+	43690870	43734371	7667	179.014	0.308731	0.10136	3.04589	0.00231991	0.184814
AHNAK	79026	NC_000011	chr11	-	62433542	62556235	19511	32959	0.3574	0.117377	3.04488	0.00232772	0.184814
ENSG00000213493	0	NC_000004	chr4	+	116598161	116599611	1451	938.452	-0.320927	0.1053	-3.04773	0.00230574	0.184814
FER1L6	654463	NC_000008	chr8	+	123851987	124120171	6230	21.1034	0.457903	0.150246	3.04769	0.00230606	0.184814
PTPRD	5789	NC_000009	chr9	-	8314246	10612723	10633	3350.91	-0.274369	0.0901935	-3.042	0.00235011	0.185724
AK021540	0	NC_000004	chr4	-	8355310	8357376	2067	229.083	-0.412298	0.135964	-3.03241	0.00242608	0.186214
CYP2J2	1573	NC_000001	chr1	-	59893308	59926790	2990	200.404	0.400889	0.132045	3.03601	0.00239735	0.186214
IFT80	57560	NC_000003	chr3	-	160227454	160449829	9836	568.005	-0.269444	0.088727	-3.03677	0.00239125	0.186214
LGR4	55366	NC_000011	chr11	-	27365961	27472787	6345	294.758	0.28464	0.0937776	3.03527	0.00240321	0.186214
NRD1	4898	NC_000001	chr1	-	51789191	51878937	8831	2800.61	-0.147429	0.0485975	-3.03368	0.00241594	0.186214
NUPR1	26471	NC_000016	chr16	-	28532708	28539174	5674	54.5053	0.463926	0.152804	3.03609	0.00239671	0.186214
USP2-AS1	100499227	NC_000011	chr11	+	119381810	119526664	1784	43.1321	-0.457127	0.15079	-3.03155	0.00243302	0.186214
FAM216A	29902	NC_000012	chr12	+	110468364	110490387	2755	149.351	-0.363283	0.119896	-3.02999	0.00244563	0.186339
DARS2	55157	NC_000001	chr1	+	173824503	173858546	3689	114.186	0.374853	0.12379	3.02814	0.00246067	0.186648
ENSG00000233028	0	NC_000007	chr7	+	56175634	56176412	779	89.6492	0.423557	0.140119	3.02283	0.00250421	0.189107
ENSG00000240809	0	NC_000003	chr3	+	76434018	76435428	1411	504.019	0.294177	0.0975054	3.01703	0.00255263	0.19191
CPLX1	10815	NC_000004	chr4	-	784957	826198	2265	781.387	-0.429828	0.142612	-3.01396	0.00257863	0.192165
NPIPB11	728888	NC_000016	chr16	-	29381303	29404786	5196	622.924	-0.458521	0.152081	-3.01497	0.00257005	0.192165
MYO5C	55930	NC_000015	chr15	-	52192318	52295798	10049	321.095	-0.36444	0.121022	-3.01136	0.00260077	0.192968
NNMT	4837	NC_000011	chr11	+	114257831	114313285	2651	21.3691	-0.461602	0.153469	-3.00778	0.00263164	0.194409
ART3	419	NC_000004	chr4	+	76011180	76112802	4671	52.4271	-0.459424	0.153299	-2.99691	0.00272727	0.198236
CFAP58	159686	NC_000010	chr10	+	104339619	104455090	3684	40.7632	0.459435	0.153357	2.99586	0.00273671	0.198236
ENPP2	5168	NC_000008	chr8	-	119557077	119673404	6203	771.558	-0.447156	0.149286	-2.9953	0.00274178	0.198236
LPPR2	64748	NC_000019	chr19	+	11355386	11365698	3273	1056.2	0.30957	0.103339	2.99569	0.00273829	0.198236
SRI	6717	NC_000007	chr7	-	88205115	88226993	4245	1799.26	0.222167	0.074047	3.00036	0.00269665	0.198236
FAM107B	83641	NC_000010	chr10	-	14518557	14774897	8494	95.1795	-0.445437	0.149031	-2.98888	0.0028	0.201588
SCRT1	83482	NC_000008	chr8	-	144330565	144336281	3779	198.082	-0.445944	0.149372	-2.98546	0.00283152	0.202997
ELK1	2002	NC_000023	chrX	-	47635520	47650604	3401	1593.12	0.384909	0.129031	2.98308	0.0028536	0.203205
PANX2	56666	NC_000022	chr22	+	50170731	50180295	3103	421.907	-0.378747	0.126986	-2.98258	0.00285834	0.203205
AK311638	0	NC_000004	chr4	-	662050	663636	1587	171.98	-0.415382	0.139438	-2.97898	0.00289206	0.204701
CYP17A1	1586	NC_000010	chr10	-	102830531	102837533	3386	24.2489	-0.45678	0.153396	-2.97778	0.00290348	0.204701
ENSG00000215007	0	NC_000023	chrX	-	107351650	107352843	1194	318.572	0.34862	0.117604	2.96435	0.00303319	0.210823
MBP	4155	NC_000018	chr18	-	76978827	77133708	17505	14989	-0.45081	0.151944	-2.96695	0.00300765	0.210823
MYRF	745	NC_000011	chr11	+	61752642	61788518	11895	757.468	-0.446175	0.150548	-2.96367	0.00303995	0.210823
ZNF518B	85460	NC_000004	chr4	-	10439873	10457410	10906	644.826	0.244481	0.0824242	2.96614	0.00301567	0.210823
LPAR1	1902	NC_000009	chr9	-	110873262	111039246	4730	180.259	-0.448127	0.151271	-2.96241	0.00305245	0.21083
CASC10	399726	NC_000010	chr10	-	21490473	21497284	3880	33.407	0.448808	0.151648	2.95953	0.00308107	0.211945
TMEM106C	79022	NC_000012	chr12	+	47963547	47968878	3037	214.473	0.330861	0.111859	2.95785	0.00309791	0.212245
CNR1	1268	NC_000006	chr6	-	88139864	88166688	6555	652.991	0.407326	0.137855	2.95474	0.00312933	0.212276
DBNDD2/SYS1	0	NC_000020	chr20	+	45363200	45410610	1313	2082.78	-0.370294	0.125453	-2.95165	0.00316084	0.212276
MCHR2	84539	NC_000006	chr6	-	99919910	99994247	2392	107.165	-0.405662	0.137403	-2.95235	0.00315362	0.212276
PARD3B	117583	NC_000002	chr2	+	204545793	205620162	9678	304.78	0.298045	0.100901	2.95382	0.00313866	0.212276
SEC14L5	9717	NC_000016	chr16	+	4958317	5019158	6477	460.043	-0.37188	0.125961	-2.95234	0.00315373	0.212276
ADRB2	154	NC_000005	chr5	+	148825245	148828687	3443	151.683	0.378866	0.128633	2.94532	0.00322618	0.215811
MYO15A	51168	NC_000017	chr17	+	18108706	18179802	19215	322.587	-0.355065	0.120904	-2.93676	0.00331659	0.219296
SLC39A12	221074	NC_000010	chr10	+	17951839	18043292	2808	681.603	0.396785	0.135093	2.93713	0.00331262	0.219296
WWC1	23286	NC_000005	chr5	+	168291651	168472303	10076	1818.03	0.3022	0.102904	2.93672	0.003317	0.219296
ABHD2	11057	NC_000015	chr15	+	89087459	89202360	9670	1380.79	0.200448	0.0684408	2.92878	0.00340299	0.22333
HFM1	164045	NC_000001	chr1	-	91260765	91404869	5781	43.5628	-0.410414	0.140137	-2.92866	0.0034043	0.22333
CCDC69	26112	NC_000005	chr5	-	151181052	151224145	4997	136.343	0.349498	0.119442	2.92609	0.00343256	0.224318
LYVE1	10894	NC_000011	chr11	-	10556966	10611689	3615	131.456	0.445932	0.152821	2.91799	0.00352293	0.229341
ADAMTS2	9509	NC_000005	chr5	-	179110851	179345430	7698	204.113	0.424519	0.146562	2.89652	0.00377327	0.236812
ALOX15B	247	NC_000017	chr17	+	8039017	8049134	3028	32.039	0.422374	0.146049	2.89201	0.00382786	0.236812
CNKSR3	154043	NC_000006	chr6	-	154159828	154510659	22557	608.8	-0.350141	0.121062	-2.89224	0.00382504	0.236812
ENSG00000236349	0	NC_000012	chr12	+	94548241	94549536	1296	98.5431	0.336688	0.115831	2.90672	0.00365244	0.236812
FAM86HP	729375	NC_000003	chr3	-	130097782	130111472	5871	58.469	-0.425435	0.146838	-2.89731	0.00376382	0.236812
HNRNPLL	92906	NC_000002	chr2	-	38560073	38603036	7254	573.477	0.261891	0.0903609	2.89828	0.0037522	0.236812
HSPA5	3309	NC_000009	chr9	-	125234848	125241387	3970	2474.38	0.375855	0.129903	2.89334	0.00381163	0.236812
MAMLD1	10046	NC_000023	chrX	+	150361422	150514178	6994	6582.25	0.305819	0.105789	2.89085	0.00384204	0.236812
MOBP	4336	NC_000003	chr3	+	39467198	39529497	12123	376.128	-0.438896	0.151149	-2.90373	0.00368743	0.236812
NECAB2	54550	NC_000016	chr16	+	83968632	84002776	1838	1599.62	0.421212	0.145535	2.89423	0.00380093	0.236812
PTPRF	5792	NC_000001	chr1	+	43525187	43623672	14356	5067.62	0.268734	0.0926105	2.90177	0.00371064	0.236812
RFX3	5991	NC_000009	chr9	-	3218297	3526004	12007	1535.57	0.332617	0.114672	2.90059	0.00372464	0.236812
SSTR1	6751	NC_000014	chr14	+	38207999	38213067	4295	242.902	0.436007	0.150659	2.894	0.00380373	0.236812
TRPC6	7225	NC_000011	chr11	-	101451476	101872562	5653	83.3444	0.425831	0.147323	2.89046	0.00384676	0.236812
ZBTB8B	728116	NC_000001	chr1	+	32465057	32496686	12846	111.123	0.426502	0.147071	2.89996	0.00373206	0.236812
DOK1	1796	NC_000002	chr2	+	74549020	74557554	3509	100.983	0.362564	0.125502	2.88892	0.00386566	0.237117
CRB2	286204	NC_000009	chr9	+	123356167	123380335	6367	454.323	0.321062	0.111317	2.8842	0.00392405	0.237328
DPP4	1803	NC_000002	chr2	-	161992241	162074542	5009	36.1755	-0.438033	0.15178	-2.88597	0.00390204	0.237328
SLC38A11	151258	NC_000002	chr2	-	164896186	164955525	6081	50.5016	-0.4304	0.149072	-2.88719	0.003887	0.237328
SOX9	6662	NC_000017	chr17	+	72121020	72126420	3935	11662.3	0.242737	0.084163	2.88413	0.00392497	0.237328
ENOSF1	55556	NC_000018	chr18	-	670324	712676	12571	119.746	-0.420091	0.145747	-2.88234	0.00394737	0.237836
PLA2G7	7941	NC_000006	chr6	-	46704201	46735693	2981	105.955	0.410634	0.142601	2.87961	0.00398165	0.239054
LENG9	94059	NC_000019	chr19	-	54461796	54463711	1916	181.072	-0.329971	0.114658	-2.87788	0.0040036	0.239525
GMPR2	51292	NC_000014	chr14	+	24232422	24239242	3640	453.783	-0.223451	0.0777604	-2.87358	0.00405843	0.241954
HS3ST1	9957	NC_000004	chr4	-	11393150	11429765	8186	26.3822	-0.439959	0.153424	-2.8676	0.00413599	0.244348
TAPBPL	55080	NC_000012	chr12	+	6451690	6466517	3124	207.825	-0.363989	0.126907	-2.86815	0.00412878	0.244348
TMC7	79905	NC_000016	chr16	+	18983934	19063942	5638	115.812	-0.384232	0.134011	-2.86716	0.00414174	0.244348
NEDD4	4734	NC_000015	chr15	-	55826917	55993746	9109	106.821	0.354004	0.123571	2.86477	0.0041731	0.245346
HR	55806	NC_000008	chr8	-	22114415	22133384	8640	1447.35	-0.413707	0.144617	-2.86071	0.00422687	0.247651
SNX5	27131	NC_000020	chr20	-	17941596	17968991	8706	526.327	0.206911	0.0723628	2.85936	0.00424502	0.24786
LRRN1	57633	NC_000003	chr3	+	3799437	3848216	4778	524.01	0.320394	0.112204	2.85547	0.00429729	0.248351
PLP1	5354	NC_000023	chrX	+	103773718	103792619	6092	6232.3	-0.437376	0.153146	-2.85595	0.00429085	0.248351
RHOBTB1	9886	NC_000010	chr10	-	60869438	61001440	5751	171.278	-0.344435	0.120564	-2.85685	0.00427862	0.248351
LONRF3	79836	NC_000023	chrX	+	118974614	119018355	4041	135.82	0.385005	0.134926	2.85346	0.00432464	0.249085
CDH13	1012	NC_000016	chr16	+	82626794	83800640	9285	3188.11	0.39418	0.138253	2.85115	0.00435608	0.249491
SEMA3C	10512	NC_000007	chr7	-	80742538	80922359	5709	340.637	0.430826	0.151125	2.85079	0.00436107	0.249491
DNAH14	127602	NC_000001	chr1	+	224929654	225399294	18792	170.995	0.353559	0.124192	2.84688	0.00441497	0.25015
KAL1	3730	NC_000023	chrX	-	8528874	8732187	7132	841.73	0.36462	0.128073	2.84696	0.00441389	0.25015
SYNC	81493	NC_000001	chr1	-	32679906	32703119	3852	236.991	0.280793	0.0986361	2.84675	0.00441675	0.25015
DDAH2	23564	NC_000006	chr6	-	31727038	31730617	2556	479.501	0.372272	0.130968	2.84247	0.0044765	0.252692
INPP5J	27124	NC_000022	chr22	+	31107975	31134697	5040	624.868	-0.279984	0.0985628	-2.84066	0.00450202	0.253291
ANK3	288	NC_000010	chr10	-	60026298	60733526	25200	12928.1	-0.148386	0.0523713	-2.83334	0.00460646	0.256435
ARHGAP36	158763	NC_000023	chrX	+	131058242	131089885	3347	33.3828	0.42175	0.148806	2.83423	0.00459366	0.256435
FRMD4B	23150	NC_000003	chr3	-	69169990	69542582	9990	140.588	-0.415511	0.146693	-2.83252	0.00461827	0.256435
THBS2	7058	NC_000006	chr6	-	169215780	169254114	6467	455.276	-0.35398	0.124844	-2.83538	0.00457717	0.256435
EVI2A	2123	NC_000017	chr17	-	31316410	31321884	3221	61.2785	-0.416833	0.147255	-2.83069	0.00464473	0.257064
FERMT2	10979	NC_000014	chr14	-	52857268	52952435	8108	718.627	0.326586	0.115463	2.8285	0.00467666	0.257991
MYOM2	9172	NC_000008	chr8	+	2045040	2165552	7062	390.58	-0.368259	0.13031	-2.82601	0.00471315	0.259162
GJB1	2705	NC_000023	chrX	+	71215194	71225516	2235	292.637	-0.421429	0.14919	-2.82477	0.00473144	0.259329
ENSG00000162621	0	NC_000001	chr1	-	74469878	74512614	3859	25.7209	0.428466	0.1518	2.82257	0.00476404	0.260276
PON2	5445	NC_000007	chr7	-	95404862	95435198	5057	1876.63	0.315862	0.111985	2.82056	0.00479393	0.26107
CALR	811	NC_000019	chr19	+	12938578	12944490	2715	9897.24	0.328076	0.116384	2.81891	0.00481868	0.261579
ITGA2	3673	NC_000005	chr5	+	52989326	53094779	7910	122.776	-0.405295	0.14384	-2.81767	0.00483731	0.261754
MPP7	143098	NC_000010	chr10	-	28050993	28334486	7554	324.322	-0.389338	0.138239	-2.81641	0.00485632	0.261948
GPR26	2849	NC_000010	chr10	+	123666355	123697399	10306	168.068	0.408306	0.145076	2.81442	0.00488651	0.262743
AMIGO2	347902	NC_000012	chr12	-	47075707	47107017	4490	76.3517	0.43037	0.153281	2.80772	0.00498932	0.267425
DOC2B	8447	NC_000017	chr17	-	142789	181636	6659	565.72	0.388202	0.13884	2.79604	0.0051733	0.270544
ECM1	1893	NC_000001	chr1	+	150508011	150513789	3413	371.848	-0.393109	0.140508	-2.79777	0.0051456	0.270544
FBXO9	26268	NC_000006	chr6	+	53051991	53100873	9476	905.852	-0.322515	0.115282	-2.79762	0.00514805	0.270544
HAPLN4	404037	NC_000019	chr19	-	19255641	19262796	3569	402.035	-0.42591	0.151992	-2.80218	0.0050758	0.270544
LRRC2	79442	NC_000003	chr3	-	46515386	46580099	5659	255.194	0.349136	0.124949	2.79422	0.00520245	0.270544
MBTD1	54799	NC_000017	chr17	-	51177425	51260427	6969	169.559	-0.330384	0.11819	-2.79537	0.00518402	0.270544
OPRK1	4986	NC_000008	chr8	-	53225716	53251697	5738	147.074	0.428348	0.153345	2.79336	0.00521632	0.270544
PDE8A	5151	NC_000015	chr15	+	84980440	85139145	8441	542.262	-0.346353	0.123717	-2.79956	0.00511729	0.270544
PPWD1	23398	NC_000005	chr5	+	65563236	65587549	8125	441.87	-0.28611	0.102163	-2.80054	0.00510176	0.270544
RAB29	8934	NC_000001	chr1	-	205767986	205775487	3909	120.456	0.331521	0.11842	2.79953	0.00511766	0.270544
TMTC1	83857	NC_000012	chr12	-	29500813	29784759	14597	1491.7	0.340586	0.121944	2.79297	0.00522267	0.270544
ADCYAP1R1	117	NC_000007	chr7	+	31052461	31111479	6832	1860.25	0.335263	0.120398	2.78463	0.00535893	0.274032
CCDC61	729440	NC_000019	chr19	+	45995461	46021318	3520	133.293	-0.385214	0.138371	-2.78392	0.00537065	0.274032
KCNT1	57582	NC_000009	chr9	+	135702185	135795275	11357	2092.3	-0.316657	0.11367	-2.78577	0.0053401	0.274032
RTTN	25914	NC_000018	chr18	-	70003793	70205945	9817	299.386	-0.258976	0.0929776	-2.78536	0.00534679	0.274032
THBS4	7060	NC_000005	chr5	+	79991311	80083287	4606	458.067	0.337129	0.121013	2.78588	0.00533828	0.274032
MOAP1	64112	NC_000014	chr14	-	93182196	93184928	2537	1350.39	-0.210753	0.0757484	-2.78227	0.00539801	0.274604
BEND7	222389	NC_000010	chr10	-	13438484	13528974	10019	64.6907	0.385808	0.138904	2.77752	0.00547761	0.275404
CPNE9	151835	NC_000003	chr3	+	9703807	9729908	2335	256.593	-0.408544	0.147003	-2.77916	0.00545004	0.275404
NID2	22795	NC_000014	chr14	-	52004802	52069228	6522	119.166	-0.344114	0.123875	-2.77791	0.00547101	0.275404
PNCK	139728	NC_000023	chrX	-	153669730	153689010	4625	759.75	0.321386	0.115712	2.77746	0.00547858	0.275404
GSTZ1	2954	NC_000014	chr14	+	77320884	77331597	8477	95.959	-0.340643	0.122727	-2.77561	0.00550978	0.276155
ARAP2	116984	NC_000004	chr4	-	35948221	36244509	12397	1077.12	-0.24454	0.0882157	-2.77206	0.00557019	0.276734
CAMTA1	23261	NC_000001	chr1	+	6785324	7769706	11057	3494.08	-0.258589	0.0932653	-2.77262	0.0055607	0.276734
MCM7	4176	NC_000007	chr7	-	100092728	100101940	4298	364.845	-0.243188	0.0877185	-2.77237	0.00556503	0.276734
COL8A2	1296	NC_000001	chr1	-	36095236	36125704	4895	78.6814	0.410809	0.148448	2.76736	0.00565123	0.27874
NIPSNAP3A	25934	NC_000009	chr9	+	104747688	104760124	2677	190.193	0.32661	0.118043	2.76687	0.00565978	0.27874
TRIM59	286827	NC_000003	chr3	-	160432445	160449838	7459	40.294	-0.407861	0.147394	-2.76715	0.00565482	0.27874
CNTN2	6900	NC_000001	chr1	+	205043197	205078499	10074	2252.74	-0.399631	0.144622	-2.76329	0.00572217	0.279915
HHIPL1	84439	NC_000014	chr14	+	99604559	99680569	8239	234.17	0.320751	0.116102	2.76267	0.00573306	0.279915
METTL22	79091	NC_000016	chr16	+	8621640	8649654	9036	282.664	-0.293331	0.10613	-2.76388	0.00571178	0.279915
CNDP1	84735	NC_000018	chr18	+	74534435	74587212	7549	633.464	-0.382366	0.138754	-2.75571	0.00585645	0.280967
DCHS1	8642	NC_000011	chr11	-	6621323	6664089	10869	2007.22	0.262636	0.0953965	2.7531	0.00590344	0.280967
FBN1	2200	NC_000015	chr15	-	48408306	48645849	12447	1217.04	-0.38744	0.140414	-2.75928	0.00579297	0.280967
HMHA1	23526	NC_000019	chr19	+	1065923	1087831	7989	115.373	0.337405	0.122322	2.75834	0.00580954	0.280967
KIAA1324L	222223	NC_000007	chr7	-	86876906	87059699	8388	501.304	-0.228783	0.083005	-2.75625	0.00584684	0.280967
PNMA3	29944	NC_000023	chrX	+	153056409	153060467	3748	756.423	-0.305664	0.111005	-2.7536	0.00589436	0.280967
SDC2	6383	NC_000008	chr8	+	96493351	96611809	4493	193.148	0.299839	0.108745	2.75727	0.00582858	0.280967
SPATA31C1	441452	NC_000009	chr9	+	87914493	87923657	4809	65.0785	-0.40932	0.148585	-2.75479	0.00587303	0.280967
TCF7L1	83439	NC_000002	chr2	+	85133410	85310388	3914	136.385	0.325319	0.11801	2.75671	0.00583863	0.280967
ANLN	54443	NC_000007	chr7	+	36389806	36453791	5595	429.152	-0.41817	0.152148	-2.74845	0.00598782	0.284187
KL	9365	NC_000013	chr13	+	33016063	33066145	5307	43.8203	0.418837	0.152685	2.74314	0.00608541	0.287214
UBOX5	22888	NC_000020	chr20	-	3107573	3160196	4738	342.428	-0.293448	0.106943	-2.74396	0.00607024	0.287214
ABCC12	94160	NC_000016	chr16	-	48082973	48156018	9431	41.3574	-0.399452	0.145673	-2.74212	0.00610442	0.287313
KCNMB2	10242	NC_000003	chr3	+	178272932	178844429	3594	41.8474	0.374351	0.136635	2.73979	0.00614776	0.288554
CACNA1E	777	NC_000001	chr1	+	181413102	181808084	17772	4537.16	0.334307	0.122061	2.73885	0.00616539	0.288584
C1QL3	389941	NC_000010	chr10	-	16512080	16522005	4156	1186.76	0.377769	0.138138	2.73473	0.00624323	0.289435
COL9A3	1299	NC_000020	chr20	+	62817062	62841159	4302	89.3246	-0.417025	0.152512	-2.73438	0.00624975	0.289435
ENSG00000259683	0	NC_000015	chr15	+	84389729	84395903	970	98.0524	-0.397124	0.145212	-2.7348	0.00624188	0.289435
FOXJ1	2302	NC_000017	chr17	-	76136333	76141299	2641	28.4833	0.408558	0.14947	2.73338	0.00626874	0.289435
SLC12A2	6558	NC_000005	chr5	+	128083766	128189688	10664	1159.56	-0.308547	0.112848	-2.73418	0.00625357	0.289435
SYT10	341359	NC_000012	chr12	-	33374238	33439819	4641	170.752	0.417384	0.152808	2.73143	0.00630604	0.290368
DNAH5	1767	NC_000005	chr5	-	13690328	14011732	16570	260.825	0.367704	0.134665	2.73052	0.00632352	0.290386
DPYSL3	1809	NC_000005	chr5	-	147390808	147510056	7167	1646.91	0.336352	0.123732	2.7184	0.0065599	0.296548
FXYD8	0	NC_000023	chrX	+	73875068	73875635	285	37.6833	0.407614	0.149958	2.71818	0.00656419	0.296548
N4BP2L1	90634	NC_000013	chr13	-	32400723	32428342	4786	190.744	-0.315234	0.115952	-2.71865	0.00655482	0.296548
SLC39A12-AS1	100129213	NC_000010	chr10	-	18001786	18010562	1966	42.2312	0.388888	0.142967	2.72011	0.00652593	0.296548
SMO	6608	NC_000007	chr7	+	129188872	129213545	4311	147.962	0.3663	0.134732	2.71872	0.00655341	0.296548
STAG3	10734	NC_000007	chr7	+	100177563	100221488	8952	459.614	-0.287708	0.105734	-2.72105	0.00650757	0.296548
TMEM26	219623	NC_000010	chr10	-	61406643	61453450	6907	29.5684	0.41664	0.153324	2.71739	0.00657987	0.296548
NXPH3	11248	NC_000017	chr17	+	49575858	49583827	5648	88.8336	-0.410899	0.151289	-2.71598	0.00660799	0.297027
ADCYAP1	116	NC_000018	chr18	+	904365	912172	4184	113.066	0.413265	0.15286	2.70355	0.00686033	0.303011
ALK	238	NC_000002	chr2	-	29192774	29921611	6611	437.074	0.316923	0.117166	2.7049	0.00683252	0.303011
DCLK2	166614	NC_000004	chr4	+	150078274	150257457	4593	1788.23	0.27925	0.103333	2.70241	0.00688378	0.303011
DNAH1	25981	NC_000003	chr3	+	52302896	52400497	14016	1500.82	-0.33058	0.122175	-2.70579	0.00681425	0.303011
ENSG00000215895	0	NC_000001	chr1	+	38708931	38710890	1960	129.827	0.381677	0.141132	2.7044	0.00684286	0.303011
GPR52	9293	NC_000001	chr1	+	174448074	174449545	1472	115.487	0.407956	0.150888	2.7037	0.00685727	0.303011
SCRG1	11341	NC_000004	chr4	-	173384701	173476214	5550	587.213	0.297827	0.110188	2.70291	0.00687347	0.303011
SLC22A8	9376	NC_000011	chr11	-	62989154	63015845	8537	30.8165	-0.410782	0.151856	-2.70507	0.0068291	0.303011
INHA	3623	NC_000002	chr2	+	219569162	219575713	1753	52.6153	-0.407321	0.150847	-2.70022	0.00692927	0.303441
SFI1	9814	NC_000022	chr22	+	31496139	31618586	11108	401.558	-0.332389	0.123067	-2.70088	0.00691569	0.303441
TSHZ3	57616	NC_000019	chr19	-	31274945	31349547	5452	307.672	-0.365865	0.135629	-2.69754	0.00698542	0.305114
BMP8A	353500	NC_000001	chr1	+	39491646	39529869	5798	58.7421	-0.374391	0.139077	-2.69196	0.00710333	0.308061
DPYD	1806	NC_000001	chr1	-	97077743	97921059	7958	593.953	0.330379	0.12273	2.69192	0.00710415	0.308061
ELK3	2004	NC_000012	chr12	+	96194382	96269835	4557	116.39	0.307695	0.114309	2.69178	0.00710728	0.308061
DMKN	93099	NC_000019	chr19	-	35491625	35513661	7657	33.3824	-0.412174	0.153434	-2.68632	0.00722434	0.309897
GABRA5	2558	NC_000015	chr15	+	26866363	26949210	7027	3670.88	0.399918	0.148805	2.68753	0.00719834	0.309897
MPP1	4354	NC_000023	chrX	-	154778684	154805527	5399	673.616	-0.242511	0.0903017	-2.68556	0.00724084	0.309897
OSGEP	55644	NC_000014	chr14	-	20446411	20455108	4895	363.035	-0.338955	0.126193	-2.68601	0.00723105	0.309897
REPS1	85021	NC_000006	chr6	-	138903493	138988282	11192	1112.81	-0.215309	0.0801346	-2.68685	0.00721302	0.309897
YAP1	10413	NC_000011	chr11	+	102110420	102233423	6411	636.837	0.297527	0.110831	2.68452	0.00726343	0.310083
ABL2	27	NC_000001	chr1	-	179099327	179229684	13257	1347.61	0.191715	0.071601	2.67754	0.00741645	0.315822
bA184C23.2	0	NC_000006	chr6	+	63211446	63213024	1579	386.374	0.372098	0.139148	2.6741	0.0074929	0.315934
CADM1	23705	NC_000011	chr11	-	115169218	115504565	11656	1788.17	0.249731	0.0934475	2.67242	0.00753065	0.315934
CCDC3	83643	NC_000010	chr10	-	12896625	13099773	5246	468.907	0.307956	0.11511	2.67532	0.0074657	0.315934
SOHLH1	402381	NC_000009	chr9	-	135693407	135700401	2274	208.982	-0.362891	0.135713	-2.67395	0.00749643	0.315934
TNR	7143	NC_000001	chr1	-	175315194	175743770	12960	4339.69	0.268049	0.10027	2.67326	0.00751172	0.315934
UGT8	7368	NC_000004	chr4	+	114598455	114678225	4919	200.546	-0.403851	0.151111	-2.67255	0.00752762	0.315934
HTR1F	3355	NC_000003	chr3	+	87792779	87994814	4627	48.5776	-0.404056	0.151311	-2.67037	0.00757677	0.317086
CMTM5	116173	NC_000014	chr14	+	23376808	23379772	2875	70.99	-0.405024	0.152254	-2.66019	0.00780966	0.318211
CRK	1398	NC_000017	chr17	-	1420689	1463162	4099	160.094	0.252566	0.0947647	2.66519	0.0076945	0.318211
CSNK1G1	53944	NC_000015	chr15	-	64165517	64373769	10568	274.904	0.216746	0.0812865	2.66644	0.0076659	0.318211
ENSG00000234369	0	NC_000010	chr10	+	63222155	63223045	891	57.6846	-0.357887	0.134501	-2.66085	0.00779439	0.318211
GPR158	57512	NC_000010	chr10	+	25175062	25602229	7729	1753.96	-0.278929	0.104818	-2.66109	0.00778891	0.318211
HIVEP2	3097	NC_000006	chr6	-	142751467	142946358	10189	5342.31	-0.223459	0.0839494	-2.66183	0.00777165	0.318211
KEL	3792	NC_000007	chr7	-	142941114	142962681	4268	58.9584	-0.407112	0.152818	-2.66404	0.00772088	0.318211
SLC5A3	6526	NC_000021	chr21	+	34073570	34106262	14154	317.872	0.373546	0.140078	2.66671	0.00765977	0.318211
STK19	8859	NC_000006	chr6	+	31971091	31982821	3954	139.868	-0.265198	0.0994335	-2.66708	0.00765125	0.318211
TBRG1	84897	NC_000011	chr11	+	124622836	124635926	8285	820.473	-0.228229	0.0857101	-2.6628	0.00774936	0.318211
ZGRF1	55345	NC_000004	chr4	-	112539333	112636995	9104	148.428	-0.305353	0.11471	-2.66196	0.00776882	0.318211
SLC16A2	6567	NC_000023	chrX	+	74421461	74533929	4173	3317.44	0.272459	0.102463	2.65908	0.00783542	0.318497
C9orf156	51531	NC_000009	chr9	-	97900099	97922570	4901	195.442	-0.268004	0.100849	-2.65748	0.00787268	0.318756
MET	4233	NC_000007	chr7	+	116672357	116798386	7117	357.195	-0.325561	0.122521	-2.6572	0.00787932	0.318756
ANXA6	309	NC_000005	chr5	-	151100706	151157882	5347	5469.66	-0.242098	0.091218	-2.65406	0.00795296	0.320971
HSPD1-8P	0	NC_000004	chr4	+	144845625	144847344	1720	61.234	0.387535	0.14609	2.65271	0.00798477	0.321206
LPPR4	9890	NC_000001	chr1	+	99263953	99309590	5540	2370.72	0.346853	0.130779	2.65221	0.00799659	0.321206
KCNV2	169522	NC_000009	chr9	+	2717239	2730037	2449	412.143	0.348291	0.13143	2.65002	0.00804869	0.322536
POLR3C	10623	NC_000001	chr1	+	145824088	145842505	2523	248.899	-0.220803	0.083387	-2.64793	0.0080986	0.323772
ENSG00000231841	0	NC_000004	chr4	+	152927446	152928207	762	277.839	-0.221771	0.0838657	-2.64436	0.00818461	0.324918
MAN1A1	4121	NC_000006	chr6	-	119177201	119350605	5106	496.404	0.400211	0.151265	2.64577	0.00815064	0.324918
NDRG1	10397	NC_000008	chr8	-	133237171	133297958	9472	990.522	-0.364526	0.137815	-2.64504	0.00816804	0.324918
RBP4	5950	NC_000010	chr10	-	93591687	93601663	1488	914.764	0.343817	0.13008	2.64312	0.00821449	0.325344
MAP3K5	4217	NC_000006	chr6	-	136557040	136793047	6193	1741.72	0.212923	0.0806403	2.64041	0.00828067	0.325687
PDE1C	5137	NC_000007	chr7	-	31751179	32299404	13932	673.892	-0.277132	0.104939	-2.64088	0.00826907	0.325687
PRKG1	5592	NC_000010	chr10	+	50991151	52298350	8306	236.24	0.312276	0.118237	2.64111	0.00826351	0.325687
CTC-558O2.1	101927969	NC_000005	chr5	+	168706567	168720884	3478	79.4958	0.347427	0.131656	2.6389	0.00831764	0.326386
ACTN4	81	NC_000019	chr19	+	38647616	38731583	5427	6343.47	-0.283805	0.107704	-2.63505	0.00841247	0.329346
NDE1	54820	NC_000016	chr16	+	15643267	15726353	11165	343.989	-0.340722	0.129499	-2.63108	0.00851135	0.33093
YIPF6	286451	NC_000023	chrX	+	68498323	68537285	8850	82.5395	0.322421	0.122497	2.63209	0.00848626	0.33093
ZBTB24	9841	NC_000006	chr6	-	109462516	109483237	5784	420.763	-0.233859	0.0888594	-2.63179	0.00849372	0.33093
FAM117A	81558	NC_000017	chr17	-	49710325	49789180	3709	125.939	0.342595	0.130281	2.62966	0.00854696	0.330941
SEC24D	9871	NC_000004	chr4	-	118722823	118838683	11041	401.766	-0.317611	0.120802	-2.62919	0.00855882	0.330941
TBC1D14	57533	NC_000004	chr4	+	6909242	7033118	6987	2310.47	0.182876	0.0695677	2.62875	0.00857006	0.330941
CPOX	1371	NC_000003	chr3	-	98521132	98593723	4101	593.899	-0.315215	0.120126	-2.62403	0.00868949	0.334034
NGEF	25791	NC_000002	chr2	-	232878686	233013272	6961	1539.31	-0.31114	0.11856	-2.62433	0.00868193	0.334034
AK095723	0	NC_000018	chr18	-	903144	906667	3524	29.7472	0.398101	0.151984	2.61937	0.00880927	0.334141
EPB41L3	23136	NC_000018	chr18	-	5392381	5630700	11161	4502.94	-0.275107	0.10501	-2.61981	0.00879785	0.334141
FUK	197258	NC_000016	chr16	+	70454421	70480274	7405	274.71	0.272067	0.103866	2.61941	0.00880826	0.334141
GATM	2628	NC_000015	chr15	-	45361124	45378793	5186	1762.56	0.264617	0.100971	2.62072	0.0087743	0.334141
RAB31	11031	NC_000018	chr18	+	9708165	9862556	5591	685.588	0.22378	0.0854341	2.61933	0.00881026	0.334141
ZFPM2	23414	NC_000008	chr8	+	104590733	105804539	7745	1796.69	-0.330305	0.125999	-2.62149	0.00875475	0.334141
GRIK4	2900	NC_000011	chr11	+	120511756	120988904	7461	590.806	0.361557	0.138146	2.61721	0.00886521	0.335476
NDUFA5	4698	NC_000007	chr7	-	123541029	123558255	5816	366.868	-0.228057	0.0871836	-2.61583	0.00890121	0.33609
CFL2	1073	NC_000014	chr14	-	34706769	34714823	7138	1328.43	-0.209373	0.0801419	-2.61253	0.00898759	0.338599
TRAPPC12	51112	NC_000002	chr2	+	3379675	3485086	12755	548.817	-0.227711	0.0872079	-2.61113	0.00902443	0.339235
GABRB2	2561	NC_000005	chr5	-	161288429	161549044	10002	2431.59	-0.259351	0.0994137	-2.60881	0.00908577	0.340036
SLC3A2	6520	NC_000011	chr11	+	62856012	62888883	5277	1295.02	0.193566	0.0741804	2.60939	0.00907035	0.340036
ADCK3	56997	NC_000001	chr1	+	226896888	226987545	8601	1526.31	0.233626	0.0896707	2.60538	0.00917717	0.34195
bA358L16.1	0	NC_000010	chr10	+	45678692	45700532	2418	41.091	-0.375521	0.144125	-2.60551	0.00917371	0.34195
ADAMTSL1	92949	NC_000009	chr9	+	18473894	18910950	12424	72.5692	-0.39736	0.152887	-2.59904	0.0093486	0.345127
ENSG00000223717	0	NC_000013	chr13	-	58751047	58752233	1187	35.5357	0.397107	0.153161	2.59274	0.00952134	0.345127
ENSG00000231397	0	NC_000007	chr7	-	149321865	149322092	228	54.3709	0.360001	0.138568	2.59801	0.00937652	0.345127
FAM118A	55007	NC_000022	chr22	+	45308968	45341955	5433	230.683	0.37854	0.146093	2.5911	0.0095671	0.345127
GABRB3	2562	NC_000015	chr15	-	26543546	26790300	12379	2794.15	0.273317	0.105455	2.59179	0.00954794	0.345127
GJA1	2697	NC_000006	chr6	+	121435599	121449727	3130	12178.8	0.356995	0.137686	2.59282	0.00951923	0.345127
GTF2A1	2957	NC_000014	chr14	-	81175452	81221377	6819	1266.43	-0.205762	0.0793623	-2.59269	0.00952273	0.345127
IDH3B	3420	NC_000020	chr20	-	2658395	2664219	2567	1874.36	-0.163597	0.0630528	-2.5946	0.00947018	0.345127
KIAA2012	100652824	NC_000002	chr2	+	202073253	202205195	8336	210.217	0.356536	0.137317	2.59644	0.00941953	0.345127
MOB1B	92597	NC_000004	chr4	+	70902326	71022449	8944	203.76	0.328187	0.126337	2.5977	0.00938507	0.345127
OSBPL11	114885	NC_000003	chr3	-	125528858	125595537	4640	406.113	0.314003	0.12078	2.59978	0.00932829	0.345127
PLTP	5360	NC_000020	chr20	-	45898620	45912364	2808	1965.9	0.300345	0.115881	2.59184	0.00954645	0.345127
ROR2	4920	NC_000009	chr9	-	91722596	91950162	5579	79.242	0.393547	0.151792	2.59266	0.0095236	0.345127
STAT4	6775	NC_000002	chr2	-	191029576	191172671	3959	309.081	-0.379006	0.14579	-2.59967	0.00933146	0.345127
ZFAND6	54469	NC_000015	chr15	+	80059568	80138393	4962	98.7736	0.298373	0.115143	2.59132	0.00956098	0.345127
SLC15A2	6565	NC_000003	chr3	+	121894089	121944187	6339	441.794	0.340226	0.131456	2.58813	0.00964989	0.347376
SYT17	51760	NC_000016	chr16	+	19168219	19268334	3882	2004.43	0.331697	0.128257	2.58619	0.00970445	0.348601
ATP8B1	5205	NC_000018	chr18	-	57646426	57803310	10840	166.897	-0.359637	0.139107	-2.58532	0.00972875	0.348737
CCT5	22948	NC_000005	chr5	-	10264597	10267146	2550	269.326	0.293783	0.113734	2.58308	0.00979227	0.34929
FAM153C	653316	NC_000005	chr5	+	178006405	178055559	4285	92.199	-0.393059	0.152214	-2.58228	0.00981487	0.34929
LURAP1	541468	NC_000001	chr1	+	46203334	46221486	2079	31.4661	-0.383756	0.14861	-2.58231	0.00981414	0.34929
WNK4	65266	NC_000017	chr17	+	42780614	42797066	5340	36.384	-0.367786	0.142449	-2.58188	0.00982642	0.34929
EFNB3	1949	NC_000017	chr17	+	7705096	7711378	3328	402.667	0.318353	0.123507	2.57762	0.00994835	0.352151
RAPGEF1	2889	NC_000009	chr9	-	131576770	131739977	9058	2896.14	0.212985	0.0826275	2.57765	0.0099475	0.352151
SRGAP1	57522	NC_000012	chr12	+	63844293	64162221	25221	510.419	0.238406	0.0925491	2.576	0.00999514	0.353072
TLE4	7091	NC_000009	chr9	+	79571773	79726882	8277	677.716	-0.327268	0.127104	-2.5748	0.0100299	0.353564
GNA12	2768	NC_000007	chr7	-	2728105	2844325	6128	1174.57	0.246941	0.0959842	2.57272	0.0100902	0.354313
GXYLT2	727936	NC_000003	chr3	+	72888073	72976926	3260	166.178	0.374342	0.14555	2.57192	0.0101137	0.354313
MAST2	23139	NC_000001	chr1	+	45786987	46036224	8714	1730.14	0.172947	0.0672438	2.57194	0.0101131	0.354313
FKBP14	55033	NC_000007	chr7	-	30010583	30026801	5447	46.7283	0.362156	0.14104	2.56775	0.0102362	0.356399
KCNS2	3788	NC_000008	chr8	+	98427022	98432848	5600	734.544	-0.388207	0.151109	-2.56904	0.010198	0.356399
STRBP	55342	NC_000009	chr9	-	123109514	123268618	10738	1409.74	-0.266375	0.103728	-2.56802	0.010228	0.356399
SCN1A	6323	NC_000002	chr2	-	165989160	166149132	9112	4887.04	-0.356151	0.13878	-2.56629	0.0102792	0.356883
TTLL11	158135	NC_000009	chr9	-	121815674	122093606	10153	482.869	-0.231968	0.0904055	-2.56586	0.0102921	0.356883
CA10	56934	NC_000017	chr17	-	51630313	52160017	4242	733.984	0.302827	0.118161	2.56284	0.010382	0.357086
FRMD6	122786	NC_000014	chr14	+	51489100	51730727	9045	197.163	-0.239092	0.0932632	-2.56363	0.0103585	0.357086
GJC2	57165	NC_000001	chr1	+	228149714	228159826	2381	369.052	-0.345536	0.134789	-2.56353	0.0103613	0.357086
S100A10	6281	NC_000001	chr1	-	151982910	151994390	1548	55.7762	0.391873	0.152808	2.56448	0.0103332	0.357086
DLG1	1739	NC_000003	chr3	-	197042560	197299300	10295	1299.71	-0.205931	0.0804395	-2.56008	0.0104649	0.359209
SUSD1	64420	NC_000009	chr9	-	112040781	112175408	4187	522.156	-0.247243	0.0966164	-2.55902	0.0104967	0.359576
ENSG00000214041	0	NC_000003	chr3	+	9348443	9349192	750	24.3249	0.390519	0.152853	2.55487	0.0106226	0.363143
FANCA	2175	NC_000016	chr16	-	89737549	89816658	10288	731.805	-0.296361	0.116061	-2.55349	0.010665	0.363143
NRN1	51299	NC_000006	chr6	-	5997999	6007605	3215	1167.94	-0.269075	0.105358	-2.55391	0.0106519	0.363143
LRRC27	80313	NC_000010	chr10	+	132332110	132381506	12060	652.579	0.242488	0.0950204	2.55195	0.0107121	0.364018
ATP6V1C2	245973	NC_000002	chr2	+	10721649	10785111	4675	285.898	0.306565	0.120176	2.55096	0.0107427	0.36433
ENSG00000213560	0	NC_000001	chr1	+	78091499	78092054	556	83.981	0.299698	0.117609	2.54826	0.010826	0.366425
ENSG00000230247	0	NC_000023	chrX	+	80529037	80530027	583	53.9486	0.311335	0.122339	2.54485	0.0109324	0.36929
LIPC	3990	NC_000015	chr15	+	58410569	58569843	4116	28.1933	0.386499	0.151986	2.54299	0.010991	0.370395
PLSCR4	57088	NC_000003	chr3	-	146192335	146251179	4232	595.369	0.28428	0.111815	2.54242	0.0110087	0.370395
CYTH2	9266	NC_000019	chr19	+	48469032	48482314	9693	975.887	-0.23882	0.0940455	-2.53941	0.0111039	0.372395
VAMP1	6843	NC_000012	chr12	-	6462237	6470987	3690	947.661	-0.386526	0.152226	-2.53916	0.011112	0.372395
EFNB1	1947	NC_000023	chrX	+	68828997	68842164	3758	396.147	0.276263	0.108939	2.53593	0.0112148	0.375099
ARHGEF28	64283	NC_000005	chr5	+	73626158	73941993	15657	644.325	0.326789	0.129036	2.53255	0.0113238	0.375256
CRHR2	1395	NC_000007	chr7	-	30651943	30700129	3984	68.0475	-0.373652	0.147591	-2.53167	0.011352	0.375256
MICAL2	9645	NC_000011	chr11	+	12093996	12263790	18061	4325.65	-0.300181	0.118522	-2.53269	0.011319	0.375256
POLR2J	5439	NC_000007	chr7	-	102473100	102478999	1465	263.917	0.31743	0.125263	2.53411	0.0112735	0.375256
SHROOM4	57477	NC_000023	chrX	-	50591642	50814302	10354	2295.74	-0.314008	0.123986	-2.53262	0.0113215	0.375256
TSPAN18	90139	NC_000011	chr11	+	44726465	44932427	5993	47.3499	0.376978	0.148899	2.53177	0.0113488	0.375256
UBTD1	80019	NC_000010	chr10	+	97498868	97571209	1706	208.604	0.306258	0.121192	2.52706	0.0115023	0.37875
ZNF469	84627	NC_000016	chr16	+	88427471	88440757	13287	4497.13	0.336074	0.132983	2.52721	0.0114974	0.37875
GALM	130589	NC_000002	chr2	+	38665910	38735668	3557	111.416	0.378451	0.149878	2.52506	0.011568	0.379702
HAPLN2	60484	NC_000001	chr1	+	156619294	156625725	2381	304.773	-0.37638	0.149072	-2.52482	0.0115759	0.379702
B4GALT6	9331	NC_000018	chr18	-	31622246	31726593	7572	645.808	-0.217784	0.0864439	-2.51937	0.0117566	0.380489
CHAF1A	10036	NC_000019	chr19	+	4402662	4443397	3829	214.792	-0.279484	0.110892	-2.52033	0.0117246	0.380489
CLK2P	1197	NC_000007	chr7	-	23584716	23586527	1812	308.081	-0.207064	0.082182	-2.51958	0.0117495	0.380489
ENSG00000249541	0	NC_000005	chr5	-	2787451	2788549	1099	80.4512	0.357355	0.141784	2.52042	0.0117215	0.380489
FXYD7	53822	NC_000019	chr19	+	35143250	35154302	1685	308.656	-0.263545	0.104554	-2.52067	0.0117132	0.380489
NKX6-2	84504	NC_000010	chr10	-	132783179	132786052	2675	420.123	-0.3692	0.146484	-2.52041	0.0117218	0.380489
TMEM159	57146	NC_000016	chr16	+	21158377	21180616	2576	75.642	0.386533	0.153378	2.52013	0.0117313	0.380489
AK3P1	0	NC_000017	chr17	+	31345521	31346187	667	68.1839	0.359391	0.142834	2.51614	0.0118648	0.382533
ARHGAP6	395	NC_000023	chrX	-	11118110	11665701	8564	141.497	0.376414	0.149569	2.51666	0.0118472	0.382533
SLC1A1	6505	NC_000009	chr9	+	4490427	4587469	4015	737.273	0.221549	0.088116	2.51429	0.0119273	0.383818
RGMB	285704	NC_000005	chr5	+	98768650	98798643	7398	418.293	0.307917	0.122581	2.51195	0.0120065	0.385638
BCAN	63827	NC_000001	chr1	+	156641390	156659532	4931	1933.4	0.327952	0.130623	2.51068	0.01205	0.385724
INTU	27152	NC_000004	chr4	+	127632932	127726737	15845	630.664	0.291293	0.116059	2.50988	0.0120773	0.385724
RUFY2	55680	NC_000010	chr10	-	68341107	68407294	8152	1047.21	-0.215657	0.0859032	-2.51047	0.012057	0.385724
TMEM176A	55365	NC_000007	chr7	+	150800403	150805120	3479	81.3872	0.361232	0.144135	2.50622	0.0122031	0.389012
DNAJC18	202052	NC_000005	chr5	-	139408588	139444491	6448	153.204	-0.259513	0.103605	-2.50482	0.0122513	0.389727
SFXN3	81855	NC_000010	chr10	+	101031234	101041244	4690	461.491	0.234792	0.0937575	2.50424	0.0122714	0.389727
ENSG00000226072	0	NC_000002	chr2	-	169658132	169661357	1261	128.63	-0.273823	0.109571	-2.49904	0.0124531	0.391052
EXOSC9	5393	NC_000004	chr4	+	121801290	121817021	4504	286.148	-0.242989	0.0972818	-2.49778	0.0124973	0.391052
GPR137	56834	NC_000011	chr11	+	64275688	64289500	3479	381.305	0.23413	0.0936127	2.50105	0.0123826	0.391052
JADE2	23338	NC_000005	chr5	+	134524312	134583230	11295	1398.99	0.213793	0.0854428	2.50218	0.0123432	0.391052
PCDH8	5100	NC_000013	chr13	-	52842889	52848641	5150	1034.04	0.368448	0.147487	2.49818	0.0124834	0.391052
RBFOX1	54715	NC_000016	chr16	+	5239870	7713338	8992	1103.12	-0.240632	0.0963325	-2.49793	0.012492	0.391052
SATB1	6304	NC_000003	chr3	-	18345387	18445588	12660	4911.29	-0.276413	0.110653	-2.49802	0.0124888	0.391052
SCMH1	22955	NC_000001	chr1	-	41027199	41242154	4786	1225.99	0.179559	0.0718388	2.49947	0.0124378	0.391052
C12orf75	387882	NC_000012	chr12	+	105235290	105371518	2227	41.8605	0.370055	0.148269	2.49584	0.0125658	0.391754
GRIA1	2890	NC_000005	chr5	+	153489615	153813869	7372	5344.81	0.306713	0.122873	2.49618	0.0125538	0.391754
ARHGEF2	9181	NC_000001	chr1	-	155946640	156002564	9840	1977.89	-0.278098	0.111996	-2.48311	0.0130241	0.393656
ATP8B4	79895	NC_000015	chr15	-	49858238	50182817	10439	143.763	0.314373	0.126212	2.49084	0.0127443	0.393656
BCL11A	53335	NC_000002	chr2	-	60451167	60553567	8094	481.149	-0.238377	0.0960088	-2.48287	0.0130329	0.393656
C9orf139	401563	NC_000009	chr9	+	137027464	137037957	4992	22.1461	-0.381651	0.153358	-2.48862	0.012824	0.393656
CKMT1B	1159	NC_000015	chr15	+	43593054	43604901	4330	527.997	-0.335052	0.134787	-2.48579	0.0129265	0.393656
EPB41	2035	NC_000001	chr1	+	28887091	29120046	9594	326.289	-0.364221	0.146298	-2.48958	0.0127895	0.393656
EPHA6	285220	NC_000003	chr3	+	96814581	97752460	6551	1100.72	0.336724	0.13563	2.48267	0.0130403	0.393656
EXOC5	10640	NC_000014	chr14	-	57200507	57269008	12021	502.237	0.211689	0.0850527	2.48891	0.0128134	0.393656
GABRA2	2555	NC_000004	chr4	-	46244453	46475230	11466	2198.63	0.272332	0.109609	2.48458	0.0129706	0.393656
HECW1	23072	NC_000007	chr7	+	43112599	43566001	13870	5003.98	-0.242757	0.0978094	-2.48194	0.013067	0.393656
HMP19	51617	NC_000005	chr5	+	174045604	174109179	3358	2471.44	0.263071	0.105631	2.49048	0.0127571	0.393656
KCNC3	3748	NC_000019	chr19	-	50311937	50333515	6277	3020.81	-0.358743	0.143911	-2.4928	0.0126739	0.393656
NOS2	4843	NC_000017	chr17	-	27756766	27893365	4719	103.215	-0.360346	0.144826	-2.48812	0.0128419	0.393656
NT5C1A	84618	NC_000001	chr1	-	39659121	39672038	1107	108.14	-0.328276	0.132181	-2.48352	0.013009	0.393656
PYROXD1	79912	NC_000012	chr12	+	21437604	21471252	5736	66.2792	-0.33058	0.133183	-2.48214	0.0130595	0.393656
SMPX	23676	NC_000023	chrX	-	21705972	21758163	1040	20.8187	-0.337042	0.135283	-2.49139	0.0127244	0.393656
STAC2	342667	NC_000017	chr17	-	39210536	39225872	3405	983.036	-0.360043	0.144547	-2.49085	0.0127439	0.393656
STIP1	10963	NC_000011	chr11	+	64185272	64204548	4231	3452.72	0.274939	0.110551	2.48698	0.0128832	0.393656
TTPA	7274	NC_000008	chr8	-	63048553	63086098	2729	28.7795	0.381206	0.15324	2.48765	0.012859	0.393656
KDM1B	221656	NC_000006	chr6	+	18155388	18223854	4677	407.258	0.261939	0.105628	2.47982	0.0131447	0.3939
PRDM2	7799	NC_000001	chr1	+	13700198	13825079	14491	2924.1	-0.219188	0.0883527	-2.48083	0.0131076	0.3939
SCRT2	85508	NC_000020	chr20	-	661596	676179	3577	21.1149	-0.324302	0.130762	-2.4801	0.0131346	0.3939
BATF3	55509	NC_000001	chr1	-	212686417	212699985	4266	43.2593	0.372197	0.150309	2.47621	0.0132785	0.394303
DAB1	1600	NC_000001	chr1	-	56994778	58546734	8039	298.892	0.318833	0.128785	2.4757	0.0132974	0.394303
HMG20B	10362	NC_000019	chr19	+	3572777	3579088	3857	252.704	0.254667	0.102801	2.47727	0.013239	0.394303
LOC644070	644070	NC_000017	chr17	-	9802353	9822071	915	21.3142	0.322435	0.130196	2.47653	0.0132667	0.394303
PPP4R4	57718	NC_000014	chr14	+	94174312	94279755	4372	1025.61	0.355071	0.143321	2.47745	0.0132324	0.394303
THEMIS2	9473	NC_000001	chr1	+	27872543	27886685	4621	72.7347	-0.376565	0.152097	-2.47582	0.0132931	0.394303
A1BG	1	NC_000019	chr19	-	58345178	58362751	6170	214.858	0.309499	0.125298	2.4701	0.0135073	0.394785
ALDH9A1	223	NC_000001	chr1	-	165662212	165698863	3312	840.678	0.276478	0.112045	2.46756	0.0136039	0.394785
ARL10	285598	NC_000005	chr5	+	176365468	176381909	11819	162.02	0.312319	0.126344	2.47197	0.0134369	0.394785
ASPA	443	NC_000017	chr17	+	3472374	3503419	5961	89.904	-0.363024	0.147174	-2.46664	0.0136389	0.394785
CD99L2	83692	NC_000023	chrX	-	150766336	150898816	7049	1286.66	-0.1915	0.0776063	-2.46758	0.013603	0.394785
CYB5R2	51700	NC_000011	chr11	-	7665095	7677181	8717	86.3383	-0.373704	0.151254	-2.4707	0.013485	0.394785
FAM178B	51252	NC_000002	chr2	-	96870475	97018438	4672	39.0261	-0.377838	0.15313	-2.46743	0.0136085	0.394785
GALNT18	374378	NC_000011	chr11	-	11270874	11622041	10483	555.464	0.301568	0.122104	2.46977	0.0135201	0.394785
MSSP1	0	NC_000012	chr12	-	66234079	66235234	1156	72.2637	-0.343239	0.138909	-2.47096	0.0134752	0.394785
P4HA2	8974	NC_000005	chr5	-	132191838	132295315	9044	487.275	0.286754	0.116164	2.46853	0.013567	0.394785
TMEM169	92691	NC_000002	chr2	+	216081866	216102783	3628	246.715	-0.236744	0.0957553	-2.47238	0.0134215	0.394785
TMEM17	200728	NC_000002	chr2	-	62460895	62535645	3493	31.2348	0.365769	0.147961	2.47207	0.0134334	0.394785
TSPAN12	23554	NC_000007	chr7	-	120787320	120950510	3596	64.2144	0.335694	0.13568	2.47416	0.013355	0.394785
TUBBP5	643224	NC_000009	chr9	+	138150113	138177433	2776	23.5042	0.374028	0.151632	2.46669	0.013637	0.394785
CPLX2	10814	NC_000005	chr5	+	175796310	175884021	7005	1517.27	-0.32318	0.131114	-2.46487	0.0137061	0.396056
WDR6	11180	NC_000003	chr3	+	49007062	49015953	5043	2579.8	0.204839	0.0831416	2.46374	0.0137497	0.39664
PGM2L1	283209	NC_000011	chr11	-	74330312	74398473	8826	2738.53	0.250384	0.10178	2.46005	0.0138916	0.39951
PNKD	25953	NC_000002	chr2	+	218270392	218346793	4688	810.581	-0.251515	0.102245	-2.45994	0.0138962	0.39951
ADAMTS3	9508	NC_000004	chr4	-	72280969	72568799	6585	278.152	0.353469	0.143845	2.45728	0.0139992	0.401033
PARD3	56288	NC_000010	chr10	-	34109560	34815325	12057	588.417	0.263508	0.107246	2.45704	0.0140087	0.401033
WDSUB1	151525	NC_000002	chr2	-	159235793	159286799	2135	100.303	0.294587	0.119909	2.45675	0.01402	0.401033
COL12A1	1303	NC_000006	chr6	-	75084326	75206051	14369	505.157	-0.352619	0.14359	-2.45573	0.0140599	0.401499
ADAM1A	8759	NC_000012	chr12	+	111899063	111902238	3176	80.6776	-0.331583	0.135067	-2.45495	0.0140906	0.401699
RYR2	6262	NC_000001	chr1	+	237042205	237833988	17903	11029.9	-0.276782	0.11283	-2.45308	0.0141638	0.403111
CELF5	60680	NC_000019	chr19	+	3224676	3297076	6067	1894.57	0.249601	0.101873	2.45012	0.014281	0.405704
DCAF12L2	340578	NC_000023	chrX	-	126163499	126166097	2599	78.4364	0.341448	0.139391	2.44957	0.0143027	0.405704
AK022556	0	NC_000011	chr11	+	7667696	7670187	2492	62.1257	-0.365181	0.149155	-2.44834	0.0143515	0.406411
GLDN	342035	NC_000015	chr15	+	51341516	51408013	7257	144.502	-0.373112	0.152499	-2.44665	0.0144192	0.407647
TPP1	1200	NC_000011	chr11	-	6612763	6619461	4427	1843.34	0.254321	0.104023	2.44486	0.0144908	0.408993
MSL1	339287	NC_000017	chr17	+	40121983	40136916	7427	1553.62	0.192037	0.0786525	2.44159	0.0146229	0.411997
ZMAT4	79698	NC_000008	chr8	-	40530590	40897833	3707	154.85	-0.348926	0.142943	-2.44102	0.0146458	0.411997
RHOT2	89941	NC_000016	chr16	+	668083	674174	5177	1042.34	-0.262838	0.107746	-2.43943	0.0147104	0.413132
TTC7B	145567	NC_000014	chr14	-	90524564	90816479	20817	2561.51	0.210982	0.0865485	2.43772	0.01478	0.413719
USP36	57602	NC_000017	chr17	-	78787381	78841441	9582	679.523	-0.250676	0.10282	-2.43801	0.0147682	0.413719
CACNB4	785	NC_000002	chr2	-	151832771	152099298	13524	699.495	-0.256134	0.105258	-2.4334	0.0149579	0.416774
PIP4K2A	5305	NC_000010	chr10	-	22534837	22714574	4561	645.186	-0.329211	0.13528	-2.43356	0.0149512	0.416774
SH3RF2	153769	NC_000005	chr5	+	145936563	146081791	7501	97.5313	-0.343281	0.141083	-2.43318	0.0149667	0.416774
SLC22A9	114571	NC_000011	chr11	+	63369670	63410919	3106	37.9467	-0.371368	0.152657	-2.43269	0.0149873	0.416774
CARD8	22900	NC_000019	chr19	-	48180770	48255946	12848	326.179	0.22565	0.0928614	2.42996	0.0151004	0.419234
LGR5	8549	NC_000012	chr12	+	71439154	71586310	5419	74.7169	-0.368239	0.151612	-2.42882	0.0151482	0.419875
DCDC2B	149069	NC_000001	chr1	+	32209094	32216196	1869	32.0148	-0.371101	0.152888	-2.42728	0.0152124	0.420574
PHYHIPL	84457	NC_000010	chr10	+	59176588	59248055	4385	1033.23	-0.209696	0.0864003	-2.42703	0.0152229	0.420574
ISLR2	57611	NC_000015	chr15	+	74100311	74138540	6117	1245.56	0.353693	0.145793	2.426	0.0152662	0.421085
SEMA3D	223117	NC_000007	chr7	-	84995553	85186855	8062	157.634	0.362608	0.149515	2.42523	0.0152987	0.421296
AK022050	0	NC_000019	chr19	-	8470581	8472191	1611	46.0966	0.323464	0.133434	2.42414	0.0153445	0.421665
APLN	8862	NC_000023	chrX	-	129645259	129654956	3224	435.797	0.370447	0.152941	2.42215	0.0154289	0.421665
BBOX1	8424	NC_000011	chr11	+	27040705	27127809	2471	130.445	0.299703	0.123706	2.42271	0.0154051	0.421665
BEND5	79656	NC_000001	chr1	-	48727523	48778603	3808	153.622	-0.3453	0.142794	-2.41817	0.015599	0.421665
CARTPT	9607	NC_000005	chr5	+	71719163	71721048	915	178.254	-0.265788	0.109778	-2.42115	0.0154717	0.421665
CEMIP	57214	NC_000015	chr15	+	80779343	80951776	7422	774.528	-0.34699	0.143394	-2.41984	0.0155274	0.421665
DGKI	9162	NC_000007	chr7	-	137381037	137847092	15641	1581.12	-0.174914	0.0723526	-2.41752	0.0156269	0.421665
FAM120C	54954	NC_000023	chrX	-	54068324	54183281	8853	850.401	0.196327	0.0812163	2.41733	0.0156347	0.421665
GALNT7	51809	NC_000004	chr4	+	173168753	173323967	6362	189.281	-0.275616	0.1139	-2.41981	0.0155288	0.421665
LCORL	254251	NC_000004	chr4	-	17841199	18021876	10032	114.764	0.285143	0.117735	2.4219	0.0154395	0.421665
MAG	4099	NC_000019	chr19	+	35292086	35313807	2932	1033.88	-0.347522	0.14368	-2.41872	0.0155753	0.421665
MLC1	23209	NC_000022	chr22	-	50059391	50085929	4324	3065.29	0.257158	0.106245	2.42042	0.0155027	0.421665
TYW1B	441250	NC_000007	chr7	-	72558744	72828234	3838	97.3841	0.338322	0.139913	2.41809	0.015602	0.421665
CPNE6	9362	NC_000014	chr14	+	24070837	24078100	5996	1450.86	0.316968	0.13146	2.41114	0.0159028	0.426864
MAPK15	225689	NC_000008	chr8	+	143716259	143722463	3118	119.29	0.326157	0.135243	2.41164	0.0158808	0.426864
PLD1	5337	NC_000003	chr3	-	171600405	171810950	9784	235.406	-0.357492	0.148266	-2.41116	0.0159018	0.426864
FAT4	79633	NC_000004	chr4	+	125315849	125492932	16989	822.601	0.329962	0.136947	2.40941	0.0159784	0.428208
GIT1	28964	NC_000017	chr17	-	29573469	29589627	5126	4375.45	0.288368	0.119712	2.40884	0.0160033	0.428208
ARHGAP25	9938	NC_000002	chr2	+	68679601	68826833	5467	166.065	0.314215	0.130589	2.40613	0.0161223	0.428909
GXL_779540	0	NC_000002	chr2	-	159871819	159904749	4057	22.5962	0.365515	0.151905	2.40621	0.016119	0.428909
TAC3	6866	NC_000012	chr12	-	57009997	57028883	1649	91.7683	-0.32784	0.136201	-2.40703	0.0160829	0.428909
TOX	9760	NC_000008	chr8	-	58805418	59119208	4131	752.434	-0.33776	0.140385	-2.40595	0.0161305	0.428909
ABHD17B	51104	NC_000009	chr9	-	71862452	71911245	3340	378.614	-0.216596	0.0900965	-2.40404	0.0162148	0.429138
FZD8	8325	NC_000010	chr10	-	35638249	35642278	4030	172.002	0.365634	0.152076	2.40429	0.0162041	0.429138
TBR1	10716	NC_000002	chr2	+	161416094	161425870	9603	1157.66	-0.314528	0.130791	-2.40482	0.0161804	0.429138
ASB2	51676	NC_000014	chr14	-	93934153	93976791	4865	288.358	0.328381	0.136716	2.40191	0.0163095	0.430973
LIMK1	3984	NC_000007	chr7	+	74083777	74122525	6818	2451.15	-0.209769	0.0873824	-2.40059	0.0163688	0.431199
MSX1	4487	NC_000004	chr4	+	4859665	4863936	2123	124.179	0.340459	0.141809	2.40083	0.0163578	0.431199
ENSG00000233225	0	NC_000007	chr7	+	39833571	39834718	1148	769.299	-0.218922	0.0912851	-2.39822	0.0164748	0.4324
ENSG00000235207	0	NC_000007	chr7	+	55645620	55646951	1332	126.284	0.344845	0.143915	2.39618	0.0165671	0.4324
FUT1	2523	NC_000019	chr19	-	48748011	48755390	4343	304.199	0.29308	0.122275	2.3969	0.0165345	0.4324
RAB11FIP1	80223	NC_000008	chr8	-	37858618	37899497	10223	200.349	0.275264	0.114868	2.39635	0.0165591	0.4324
RAB37	326624	NC_000017	chr17	+	74670578	74747335	5108	114.014	-0.339776	0.141721	-2.39749	0.0165077	0.4324
STON2	85439	NC_000014	chr14	-	81260650	81436465	14712	1362.11	0.295707	0.12335	2.3973	0.0165163	0.4324
GRM1	2911	NC_000006	chr6	+	146027646	146437646	7320	4365.61	0.338021	0.141142	2.39491	0.0166246	0.433235
CRLF1	9244	NC_000019	chr19	-	18572220	18607741	3396	337.064	0.355483	0.148486	2.39406	0.0166632	0.433576
DAAM2	23500	NC_000006	chr6	+	39792366	39904877	13515	2787.44	-0.3128	0.130737	-2.39258	0.0167302	0.434654
DLC1	10395	NC_000008	chr8	-	13083361	13515658	10471	1224.72	-0.229849	0.0961606	-2.39026	0.0168364	0.435413
DOK6	220164	NC_000018	chr18	+	69401048	69849087	9337	913.987	0.327759	0.137119	2.39033	0.0168332	0.435413
PXK	54899	NC_000003	chr3	+	58332880	58426127	6128	632.922	-0.299001	0.125075	-2.39058	0.0168219	0.435413
ADPRTP1	0	NC_000013	chr13	+	110936759	110939784	3026	663.852	0.193704	0.0811202	2.38786	0.0169468	0.435568
B3GALNT1	8706	NC_000003	chr3	-	161083883	161105384	4197	977.917	0.217292	0.0910982	2.38524	0.0170678	0.435568
ELMO3	79767	NC_000016	chr16	+	67199111	67204029	2575	31.5887	-0.3519	0.147522	-2.3854	0.0170606	0.435568
KIF13B	23303	NC_000008	chr8	-	29067278	29263303	11131	897.659	-0.254829	0.106811	-2.3858	0.0170421	0.435568
NR2E1	7101	NC_000006	chr6	+	108166058	108188809	3352	289.537	0.282233	0.118186	2.38804	0.0169385	0.435568
OVCH1	341350	NC_000012	chr12	-	29412474	29497686	3759	29.6827	0.362758	0.152155	2.38414	0.0171192	0.435568
SEMA4F	10505	NC_000002	chr2	+	74654228	74683854	6997	872.045	0.234224	0.098216	2.38478	0.0170893	0.435568
SPARC	6678	NC_000005	chr5	-	151661096	151687165	7295	2902.96	0.314618	0.131969	2.38403	0.0171243	0.435568
TGFBR2	7048	NC_000003	chr3	+	30606502	30694142	4955	358.056	0.29966	0.125601	2.3858	0.0170418	0.435568
TP53INP2	58476	NC_000020	chr20	+	34704290	34713439	4228	218.52	-0.351898	0.147311	-2.38881	0.0169032	0.435568
ZBTB46	140685	NC_000020	chr20	-	63743666	63832377	7626	113.856	0.317888	0.133259	2.38549	0.0170563	0.435568
PKN1	5585	NC_000019	chr19	+	14433323	14471869	4103	1291.47	0.264052	0.110788	2.3834	0.0171534	0.435657
ENSG00000214298	0	NC_000010	chr10	+	125166677	125166937	261	149.54	-0.234362	0.0984422	-2.38071	0.0172794	0.438201
FAM105A	54491	NC_000005	chr5	+	14581775	14616180	7057	55.3704	0.317286	0.133396	2.37853	0.017382	0.438838
MAMDC2	256691	NC_000009	chr9	+	70043581	70226972	3856	38.7191	-0.363498	0.1528	-2.37891	0.0173638	0.438838
RASGRP1	10125	NC_000015	chr15	-	38488101	38565442	5549	869.904	-0.346636	0.145707	-2.379	0.0173597	0.438838
LRRIQ1	84125	NC_000012	chr12	+	85036314	85264457	8568	65.2023	0.345052	0.145146	2.37728	0.0174409	0.439672
CTBP1-AS2	92070	NC_000004	chr4	+	1249440	1287719	2499	96.9496	-0.279821	0.11774	-2.37661	0.0174725	0.439815
LIX1L	128077	NC_000001	chr1	-	145933423	145958019	3993	253.564	0.243083	0.102358	2.37484	0.0175565	0.441275
PSME4	23198	NC_000002	chr2	-	53864067	53970840	12836	721.007	-0.252034	0.10617	-2.37386	0.017603	0.441791
PAPPA	5069	NC_000009	chr9	+	116153792	116402322	11585	44.8593	-0.362982	0.153028	-2.372	0.0176922	0.443376
ENSG00000238082	0	NC_000002	chr2	+	178454716	178455428	713	419.992	0.170064	0.0717151	2.37139	0.0177214	0.443452
DNAJB6	10049	NC_000007	chr7	+	157335381	157417439	15467	531.609	0.199137	0.0840816	2.36837	0.0178666	0.444579
NLGN4X	57502	NC_000023	chrX	-	5840637	6228882	7544	2378.63	0.227161	0.0959106	2.36847	0.017862	0.444579
PAPD4	167153	NC_000005	chr5	+	79612120	79686648	5824	341.999	-0.248199	0.104779	-2.36878	0.017847	0.444579
PSD3	23362	NC_000008	chr8	-	18527301	19014460	15626	3645.51	0.225194	0.0950876	2.36828	0.0178711	0.444579
ZC3HAV1	56829	NC_000007	chr7	-	139043520	139109720	8760	351.556	0.255922	0.108103	2.36739	0.0179138	0.44499
CERS6	253782	NC_000002	chr2	+	168455862	168775137	7408	613.077	0.219183	0.0926615	2.36541	0.01801	0.446131
GPR37	2861	NC_000007	chr7	-	124745601	124766025	3815	194.349	-0.361778	0.15301	-2.36441	0.0180589	0.446131
LRRC10B	390205	NC_000011	chr11	+	61508800	61511018	2219	81.584	0.358746	0.151735	2.36429	0.0180648	0.446131
PPARGC1A	10891	NC_000004	chr4	-	23755041	24091635	11158	1072.94	-0.265624	0.112315	-2.36499	0.0180304	0.446131
CMTM4	146223	NC_000016	chr16	-	66614750	66696707	8117	622.303	0.258639	0.109481	2.3624	0.0181568	0.446459
RNASE6	6039	NC_000014	chr14	+	20781051	20782467	1061	32.3458	0.361665	0.153053	2.363	0.0181278	0.446459
SLC44A1	23446	NC_000009	chr9	+	105244613	105439171	13649	990.287	-0.290071	0.122761	-2.3629	0.0181328	0.446459
SYNPO2	171024	NC_000004	chr4	+	118850688	119061247	14041	1800.2	-0.249627	0.105722	-2.36116	0.0182179	0.447313
PLEKHG3	26030	NC_000014	chr14	+	64703870	64750247	12170	982.093	-0.234769	0.0994649	-2.36032	0.018259	0.447675
NRGN	4900	NC_000011	chr11	+	124739846	124747210	1309	761.22	-0.28799	0.122112	-2.35842	0.0183531	0.448688
ZNF860	344787	NC_000003	chr3	+	31981771	31991736	3371	34.0266	-0.34858	0.14779	-2.35862	0.0183432	0.448688
DCLK1	9201	NC_000013	chr13	-	35768652	36132020	14709	5229.44	-0.200237	0.0850541	-2.35423	0.0185609	0.450507
ENSG00000260865	0	NC_000016	chr16	-	58597589	58597945	357	22.1921	0.355221	0.150769	2.35606	0.0184697	0.450507
SLC25A1	6576	NC_000022	chr22	-	19175575	19178863	2022	339.899	0.242633	0.103038	2.3548	0.0185326	0.450507
SLC25A37	51312	NC_000008	chr8	+	23528805	23575463	9975	319.594	-0.264972	0.112536	-2.35456	0.0185449	0.450507
TYMS	7298	NC_000018	chr18	+	657604	673578	2470	24.5038	-0.35436	0.150433	-2.3556	0.0184929	0.450507
ZNHIT1	10467	NC_000007	chr7	+	101217668	101224190	5511	165.632	0.273722	0.116293	2.35372	0.0185866	0.450507
DFNB59	494513	NC_000002	chr2	+	178451436	178461422	3362	24.5771	-0.35885	0.152577	-2.35193	0.0186764	0.450753
MAML1	9794	NC_000005	chr5	+	179732850	179796511	10690	561.736	-0.223284	0.0949264	-2.35218	0.0186637	0.450753
SLC6A15	55117	NC_000012	chr12	-	84859488	84913615	8779	630.746	0.284805	0.121078	2.35224	0.0186608	0.450753
CD22	933	NC_000019	chr19	+	35319261	35347361	7294	237.931	-0.352698	0.150006	-2.35122	0.0187119	0.450969
NKAIN3	286183	NC_000008	chr8	+	62248591	62999652	3767	183.345	0.350615	0.149164	2.35053	0.0187468	0.451172
CACNG4	27092	NC_000017	chr17	+	66964864	67033402	3430	513.244	0.347492	0.147952	2.34869	0.0188397	0.451488
HERC6	55008	NC_000004	chr4	+	88378686	88443111	5846	308.585	-0.28482	0.12125	-2.34903	0.0188225	0.451488
RAP2B	5912	NC_000003	chr3	+	153162212	153170624	8413	85.1372	0.314468	0.133878	2.34891	0.0188283	0.451488
KDM2B	84678	NC_000012	chr12	-	121429096	121581015	14142	1214.82	-0.175883	0.0749029	-2.34815	0.018867	0.451506
PDE11A	50940	NC_000002	chr2	-	177623249	178108339	12806	50.6787	0.343652	0.146441	2.34669	0.018941	0.452638
EZR	7430	NC_000006	chr6	-	158765741	158819424	3522	3381.89	0.283798	0.121005	2.34534	0.0190097	0.453642
BEND4	389206	NC_000004	chr4	-	42110853	42152878	11027	61.2337	0.338366	0.144377	2.34363	0.0190969	0.454069
OVCA2	124641	NC_000017	chr17	+	2041936	2043431	1123	186.224	-0.215268	0.0918247	-2.34434	0.0190609	0.454069
UNC5C	8633	NC_000004	chr4	-	95162504	95549210	10018	680.51	-0.252259	0.107646	-2.34342	0.0191077	0.454069
ENSG00000257199	0	NC_000012	chr12	-	76984079	76984669	591	29.6524	-0.342196	0.146131	-2.3417	0.019196	0.454589
HINTP1	0	NC_000007	chr7	-	143312684	143313061	378	576.642	-0.250123	0.106825	-2.34143	0.0192099	0.454589
SPATA17	128153	NC_000001	chr1	+	217631324	217871696	6850	27.8814	0.359056	0.153291	2.34232	0.0191642	0.454589
PAPPA2	60676	NC_000001	chr1	+	176463171	176845605	10931	93.1003	0.297458	0.127109	2.34018	0.0192742	0.455477
NIPA1	123606	NC_000015	chr15	+	22773063	22829791	8700	645.589	-0.217412	0.0929908	-2.338	0.0193874	0.45688
SLC35D2	11046	NC_000009	chr9	-	96313437	96383710	3666	56.918	-0.339284	0.145088	-2.33848	0.0193625	0.45688
SLC4A11	83959	NC_000020	chr20	-	3227417	3239241	4502	205.698	0.354201	0.151677	2.33524	0.0195309	0.459625
FAM90A25P	389633	NC_000008	chr8	-	12414521	12418090	1954	181.369	0.347109	0.148686	2.33451	0.0195692	0.45989
RBM11	54033	NC_000021	chr21	+	14216130	14228372	2324	48.4473	-0.315851	0.135375	-2.33315	0.01964	0.460916
CADPS2	93664	NC_000007	chr7	-	122318424	122886759	6352	1365.36	-0.354546	0.152134	-2.33048	0.0197811	0.462768
ENSG00000166530	0	NC_000004	chr4	-	110251871	110252099	229	46.8141	0.339928	0.145889	2.33005	0.0198033	0.462768
LRRC4C	57689	NC_000011	chr11	-	40114199	41459773	5360	475.723	0.244274	0.104849	2.32977	0.0198182	0.462768
TENM1	10178	NC_000023	chrX	-	124375903	124963817	12969	1491.7	0.303117	0.130116	2.32959	0.0198279	0.462768
AK124695	0	NC_000015	chr15	-	42715537	42719652	4116	90.5829	-0.308013	0.132355	-2.32717	0.0199565	0.463435
C10orf11	83938	NC_000010	chr10	+	75431453	76560167	5217	51.2209	0.322421	0.138509	2.3278	0.0199225	0.463435
RAB8B	51762	NC_000015	chr15	+	63189469	63267782	5166	257.759	0.252182	0.108371	2.32701	0.0199647	0.463435
ZDHHC23	254887	NC_000003	chr3	+	113947901	113986859	7468	566.758	0.286211	0.122996	2.32699	0.0199656	0.463435
PTMS	5763	NC_000012	chr12	+	6765516	6770952	1475	719.088	0.279213	0.12013	2.32426	0.0201117	0.465556
TSPAN9	10867	NC_000012	chr12	+	3077355	3286564	6501	103.044	-0.309572	0.133171	-2.32462	0.0200922	0.465556
E2F3	1871	NC_000006	chr6	+	20401906	20493715	5210	114.881	0.267412	0.115302	2.31922	0.0203831	0.46673
Em:AB014080.2	0	NC_000006	chr6	+	30485940	30486590	651	201.537	0.220047	0.0948536	2.31985	0.0203487	0.46673
FAM65B	9750	NC_000006	chr6	-	24797373	25042287	11557	980.069	0.321285	0.13847	2.32025	0.0203272	0.46673
HSD17B6	8630	NC_000012	chr12	+	56752161	56787790	2050	135.859	0.303888	0.131058	2.31873	0.0204096	0.46673
KCNG3	170850	NC_000002	chr2	-	42442017	42494097	3824	96.0477	0.353525	0.152359	2.32034	0.0203222	0.46673
MLEC	9761	NC_000012	chr12	+	120686869	120701864	6626	396.31	0.212511	0.0915768	2.32057	0.0203099	0.46673
NCBP2-AS2	152217	NC_000003	chr3	+	196942674	196944013	1340	53.2227	-0.329676	0.142158	-2.31908	0.0203909	0.46673
PRKCG	5582	NC_000019	chr19	+	53882176	53907652	3202	7396.61	0.303861	0.130993	2.31968	0.0203581	0.46673
TLR5	7100	NC_000001	chr1	-	223109406	223143282	4802	91.4225	0.35187	0.15175	2.31874	0.0204089	0.46673
ENSG00000277998	0	NC_000002	chr2	+	164573741	164574054	314	62.5681	0.296219	0.127862	2.31671	0.0205194	0.468609
CCDC25	55246	NC_000008	chr8	-	27733311	27772653	4415	209.259	-0.245803	0.106257	-2.31329	0.0207068	0.469732
GPR173	54328	NC_000023	chrX	+	53049091	53080615	4608	115.13	0.27179	0.117466	2.31377	0.0206804	0.469732
MAP3K9	4293	NC_000014	chr14	-	70722526	70809534	12393	867.31	-0.215819	0.093223	-2.31508	0.0206083	0.469732
TRO	7216	NC_000023	chrX	+	54920563	54931431	6624	938.655	-0.180925	0.0782084	-2.31336	0.0207026	0.469732
ZDHHC11B	653082	NC_000005	chr5	-	710355	784742	5300	394.139	-0.350776	0.151568	-2.31432	0.02065	0.469732
APOBEC4	403314	NC_000001	chr1	-	183646275	183653316	2782	31.5755	-0.348774	0.151052	-2.30897	0.0209452	0.47183
CLDND1	56650	NC_000003	chr3	-	98515473	98523066	4264	1721.22	-0.316016	0.136975	-2.3071	0.0210492	0.47183
ENSG00000217289	0	NC_000002	chr2	+	129992889	129994040	1152	77.6908	-0.288669	0.125096	-2.30757	0.021023	0.47183
ENSG00000231344	0	NC_000001	chr1	+	27739091	27739439	349	48.6359	0.313605	0.135916	2.30734	0.0210358	0.47183
FAM132B	151176	NC_000002	chr2	+	238158982	238168900	3695	40.7083	0.347713	0.150629	2.30841	0.0209765	0.47183
FAM214A	56204	NC_000015	chr15	-	52581317	52709817	7087	252.871	-0.245422	0.106217	-2.31057	0.0208566	0.47183
GABRG3	2567	NC_000015	chr15	+	26971282	27541991	11664	271.49	-0.257411	0.111511	-2.30838	0.0209779	0.47183
MRAS	22808	NC_000003	chr3	+	138347648	138405535	5649	1291.63	0.269288	0.116614	2.30923	0.0209308	0.47183
SCN11A	11280	NC_000003	chr3	-	38845769	38953651	7726	26.519	-0.353793	0.15327	-2.30829	0.0209828	0.47183
CNTN3	5067	NC_000003	chr3	-	74262568	74614436	5207	675.143	0.246017	0.106792	2.30371	0.0212392	0.473015
DNMT3B	1789	NC_000020	chr20	+	32762385	32809356	5218	72.1783	-0.318548	0.138279	-2.30367	0.0212413	0.473015
LRRC57	255252	NC_000015	chr15	-	42537820	42548804	8116	154.324	0.247471	0.10738	2.30462	0.0211877	0.473015
MASTL	84930	NC_000010	chr10	+	27153922	27186924	4630	168.625	-0.26223	0.113752	-2.30527	0.0211512	0.473015
MLF1	4291	NC_000003	chr3	+	158571163	158607252	3433	127.398	0.249602	0.10832	2.30429	0.0212063	0.473015
DTNBP1	84062	NC_000006	chr6	-	15522801	15663058	3019	668.833	0.232658	0.101164	2.29981	0.0214588	0.475193
FBLN7	129804	NC_000002	chr2	+	112138385	112188216	6685	88.1886	-0.351699	0.152901	-2.30018	0.0214381	0.475193
KLHL4	56062	NC_000023	chrX	+	87517712	87670050	5855	249.591	0.205668	0.0893788	2.30108	0.0213871	0.475193
MRPL44	65080	NC_000002	chr2	+	223957404	223967714	4293	159.181	0.245601	0.106772	2.30024	0.0214346	0.475193
NEUROD1	4760	NC_000002	chr2	-	181673088	181680876	3673	257.104	0.346	0.15047	2.29946	0.0214789	0.475193
ENKUR	219670	NC_000010	chr10	-	24981979	25062279	7483	37.1039	0.329665	0.143407	2.29881	0.0215157	0.475387
TMEM132A	54972	NC_000011	chr11	+	60924441	60937159	5931	2734.5	0.247591	0.107758	2.29767	0.0215807	0.476206
NTRK2	4915	NC_000009	chr9	+	84668502	85027070	20552	16248.4	0.235733	0.102704	2.29526	0.0217184	0.476309
POU3F4	5456	NC_000023	chrX	+	83508250	83509767	1518	54.5093	0.342845	0.149392	2.29494	0.0217368	0.476309
RECQL4	9401	NC_000008	chr8	-	144511284	144517826	4156	131.029	-0.279663	0.121777	-2.29652	0.0216459	0.476309
SPSB1	80176	NC_000001	chr1	+	9292880	9369532	3403	38.7248	-0.348145	0.151721	-2.29464	0.0217536	0.476309
TMEM108	66000	NC_000003	chr3	+	133038288	133397792	8470	691.347	0.263624	0.114815	2.29606	0.0216723	0.476309
ZNF276	92822	NC_000016	chr16	+	89720195	89740925	7644	1350.62	-0.256983	0.111966	-2.29519	0.0217222	0.476309
HS2ST1	9653	NC_000001	chr1	+	86914648	87169201	10835	409.907	0.208833	0.0910627	2.29328	0.0218316	0.477402
CACYBP	27101	NC_000001	chr1	+	174999435	175012027	4906	624.165	0.197589	0.0863311	2.28874	0.0220945	0.477923
ENSG00000214147	0	NC_000003	chr3	+	190830965	190832173	1209	140.384	0.273128	0.119359	2.28829	0.0221204	0.477923
FHL1	2273	NC_000023	chrX	+	136146702	136211359	5308	2949.27	0.143173	0.0625284	2.28973	0.0220368	0.477923
KCTD4	386618	NC_000013	chr13	-	45192853	45201040	2119	148.246	0.350574	0.153015	2.2911	0.0219574	0.477923
KLF12	11278	NC_000013	chr13	-	73686012	74134263	12063	291.756	-0.253934	0.110959	-2.28854	0.0221062	0.477923
MREG	55686	NC_000002	chr2	-	215942591	216013623	3213	93.4176	-0.317707	0.13865	-2.29142	0.0219389	0.477923
NINJ2	4815	NC_000012	chr12	-	564296	663779	2375	46.8217	-0.346397	0.151329	-2.28904	0.0220773	0.477923
RFPL1	5988	NC_000022	chr22	+	29438583	29442455	1496	415.381	-0.275702	0.120524	-2.28753	0.0221649	0.477923
S1PR5	53637	NC_000019	chr19	-	10512742	10517992	2868	28.4023	-0.347709	0.151937	-2.2885	0.0221082	0.477923
STXBP4	252983	NC_000017	chr17	+	54968727	55173632	18055	69.6878	0.322207	0.140837	2.28779	0.0221498	0.477923
TEAD2	8463	NC_000019	chr19	-	49340595	49362457	3204	52.7888	0.350644	0.153184	2.28904	0.0220769	0.477923
DNAJB1	3337	NC_000019	chr19	-	14514769	14529356	3199	706.375	0.339292	0.14839	2.28649	0.0222257	0.478022
ENSG00000250746	0	NC_000004	chr4	+	164188311	164190367	2057	123.456	0.333823	0.145974	2.28686	0.0222038	0.478022
DSC1	1823	NC_000018	chr18	-	31129236	31162856	4271	22.9184	-0.314971	0.137795	-2.28579	0.0222667	0.478298
IRAK1	3654	NC_000023	chrX	-	154010500	154019980	3902	1041.8	0.212231	0.0928772	2.28507	0.0223087	0.478595
GLYCTK	132158	NC_000003	chr3	+	52287820	52295256	4824	117.254	-0.307131	0.134454	-2.28429	0.0223547	0.478977
FAM127A	8933	NC_000023	chrX	+	135032303	135033546	1244	487.562	0.201412	0.0881943	2.28373	0.0223876	0.479079
SGMS2	166929	NC_000004	chr4	+	107763135	107915047	7092	66.1237	-0.327615	0.143614	-2.28121	0.0225358	0.480632
SOBP	55084	NC_000006	chr6	+	107489958	107661309	11585	10398.7	0.22157	0.097135	2.28106	0.0225451	0.480632
SUGT1	10910	NC_000013	chr13	+	52652696	52700909	15116	373.473	0.255407	0.111946	2.28152	0.0225178	0.480632
EMP3	2014	NC_000019	chr19	+	48321509	48330553	1667	131.601	0.348867	0.153039	2.27959	0.0226319	0.481192
PEX6	5190	NC_000006	chr6	-	42963870	42979243	4296	1459.66	0.286449	0.125681	2.27918	0.0226563	0.481192
SLC1A3	6507	NC_000005	chr5	+	36606355	36688334	6266	11632.8	0.276761	0.121393	2.27987	0.0226152	0.481192
COL5A1	1289	NC_000009	chr9	+	134641774	134844843	12972	133.559	-0.348166	0.152832	-2.27809	0.0227209	0.48175
PDIA6	10130	NC_000002	chr2	-	10767795	10837977	7291	852.632	0.250727	0.110075	2.27779	0.0227393	0.48175
GPR98	84059	NC_000005	chr5	+	90558800	91164221	20043	7377.06	0.29783	0.130797	2.27704	0.0227839	0.482094
GNG2	54331	NC_000014	chr14	+	51826200	51969800	6137	498.838	0.314933	0.13835	2.27635	0.0228251	0.482365
RPS6KB2	6199	NC_000011	chr11	+	67428460	67435408	5822	213.566	-0.246847	0.108488	-2.27534	0.0228852	0.483035
CXorf22	170063	NC_000023	chrX	+	35919734	35990152	3613	30.2611	0.346449	0.152421	2.27297	0.0230281	0.483646
ENSG00000213312	0	NC_000006	chr6	-	63548708	63549508	801	27.0409	0.347163	0.152684	2.27373	0.0229822	0.483646
FAM188B	84182	NC_000007	chr7	+	30771417	30892387	7867	226.429	-0.242812	0.106817	-2.27316	0.0230165	0.483646
HERC4	26091	NC_000010	chr10	-	67921899	68075348	16544	858.296	0.170171	0.0748404	2.27378	0.0229793	0.483646
BBS7	55212	NC_000004	chr4	-	121824329	121870497	5276	487.854	-0.201587	0.0887522	-2.27134	0.0231263	0.483915
FZD7	8324	NC_000002	chr2	+	202034587	202038445	3859	100.549	0.33566	0.147724	2.27221	0.0230737	0.483915
LOC727896	727896	NC_000018	chr18	-	2943212	2946890	3679	218.378	0.330258	0.145375	2.27177	0.0231003	0.483915
FHL2	2274	NC_000002	chr2	-	105360812	105438773	4815	126.785	-0.326763	0.143953	-2.26992	0.0232121	0.485114
PAIP2B	400961	NC_000002	chr2	-	71182738	71227103	6452	166.735	-0.317806	0.140116	-2.26817	0.0233191	0.486152
SDHAP3	728609	NC_000005	chr5	-	1568522	1594620	4085	235.471	-0.338639	0.149277	-2.26853	0.023297	0.486152
CCDC78	124093	NC_000016	chr16	-	722582	726954	4147	94.1744	-0.320776	0.141731	-2.26328	0.0236187	0.486549
CCDC85C	317762	NC_000014	chr14	-	99500180	99604390	17049	635.094	0.225626	0.0997354	2.26224	0.0236824	0.486549
CDHR1	92211	NC_000010	chr10	+	84194635	84219621	7633	927.176	0.311559	0.137577	2.26461	0.0235368	0.486549
CLPTM1L	81037	NC_000005	chr5	-	1317744	1345099	8910	599.515	0.218063	0.0964116	2.26179	0.0237103	0.486549
DNASE2	1777	NC_000019	chr19	-	12875211	12881521	2442	297.844	0.238104	0.10512	2.26508	0.023508	0.486549
ENO2	2026	NC_000012	chr12	+	6914327	6923698	4116	12489.5	-0.218432	0.0963681	-2.26664	0.0234121	0.486549
ENSG00000276576	0	NC_000006	chr6	+	57029521	57029988	468	39.8859	0.313444	0.138496	2.26319	0.0236238	0.486549
FOXE1	2304	NC_000009	chr9	+	97853254	97856715	3462	20.5063	-0.334293	0.147675	-2.2637	0.0235925	0.486549
KCNC4	3749	NC_000001	chr1	+	110210714	110282631	27590	1415.51	0.177057	0.0782396	2.26301	0.0236353	0.486549
NRF1	4899	NC_000007	chr7	+	129611714	129757082	4125	230.194	-0.272384	0.120257	-2.26502	0.0235112	0.486549
OPN3	23596	NC_000001	chr1	-	241590102	241677376	3754	260.069	-0.265323	0.117159	-2.26465	0.023534	0.486549
PRKCD	5580	NC_000003	chr3	+	53156009	53192717	3495	848.792	0.304204	0.134468	2.26227	0.0236806	0.486549
TSHZ2	128553	NC_000020	chr20	+	52972407	53495330	12633	184.128	-0.337765	0.149303	-2.26228	0.0236799	0.486549
HLA-DQA2	3118	NC_000006	chr6	+	32741342	32747215	1524	42.3872	0.245055	0.108409	2.26047	0.0237921	0.48705
RRP15	51018	NC_000001	chr1	+	218285287	218337983	7771	145.414	0.261161	0.115522	2.2607	0.0237776	0.48705
CLASP2	23122	NC_000003	chr3	-	33496245	33718356	16918	4758.54	-0.142868	0.0632675	-2.25816	0.0239355	0.489113
GPXL2	0	NC_000023	chrX	-	13378735	13379340	606	86.2742	0.2763	0.122369	2.25792	0.0239504	0.489113
LCA5L	150082	NC_000021	chr21	-	39405844	39445805	5843	21.1084	-0.346308	0.153406	-2.25745	0.0239798	0.489125
ANKFN1	162282	NC_000017	chr17	+	56110958	56511659	6696	167.993	0.318488	0.141147	2.25643	0.024044	0.489493
CFAP54	144535	NC_000012	chr12	+	96489571	96765270	9484	139.959	0.258707	0.114663	2.25624	0.0240555	0.489493
ISOC1	51015	NC_000005	chr5	+	129094749	129114028	1942	126.725	0.255623	0.113374	2.2547	0.0241521	0.4897
PEG10	23089	NC_000007	chr7	+	94656325	94669695	6689	4032.44	0.345692	0.153301	2.25499	0.0241337	0.4897
PVRL3	25945	NC_000003	chr3	+	111071743	111194170	7337	598.846	0.263125	0.116673	2.25524	0.0241185	0.4897
MIR124-2HG	100130155	NC_000008	chr8	+	64373328	64383283	2336	55.1807	-0.330423	0.146624	-2.25354	0.024225	0.490593
DYRK3	8444	NC_000001	chr1	+	206635536	206684419	4354	71.4989	0.310996	0.138153	2.2511	0.024379	0.491951
THSD1	55901	NC_000013	chr13	-	52377167	52406494	3348	255.464	0.267065	0.118631	2.25123	0.0243708	0.491951
UCHL5	51377	NC_000001	chr1	-	193012250	193060107	7117	341.131	-0.211174	0.0937959	-2.25142	0.0243589	0.491951
NOP10	55505	NC_000015	chr15	-	34341713	34343177	554	868.264	0.212885	0.0946035	2.25029	0.0244304	0.492405
NPY2R	4887	NC_000004	chr4	+	155173772	155217078	3653	80.9629	0.2979	0.132615	2.24636	0.024681	0.496866
NOV	4856	NC_000008	chr8	+	119416306	119424438	2758	314.108	0.271806	0.12104	2.24558	0.024731	0.497283
DMXL2	23312	NC_000015	chr15	-	51447711	51622833	15273	4136.77	-0.134335	0.0598613	-2.2441	0.0248259	0.497327
FAM213B	127281	NC_000001	chr1	+	2586460	2591469	3402	241.85	0.286453	0.127726	2.24272	0.0249148	0.497327
NME5	8382	NC_000005	chr5	-	138115172	138139443	2392	270.453	-0.217355	0.0968366	-2.24455	0.0247969	0.497327
NPAS2	4862	NC_000002	chr2	+	100820151	100996829	14592	1322.37	0.218459	0.0973427	2.24423	0.0248177	0.497327
OSTF1	26578	NC_000009	chr9	+	75088482	75149431	3574	165.137	-0.300723	0.134078	-2.24289	0.0249038	0.497327
SFRP1	6422	NC_000008	chr8	-	41261957	41309497	4762	74.3402	0.306056	0.136488	2.24236	0.0249381	0.497327
TTC30A	92104	NC_000002	chr2	-	177612992	177618966	5975	52.7616	-0.301475	0.1344	-2.24313	0.0248885	0.497327
ASAP2	8853	NC_000002	chr2	+	9206765	9405683	9298	800.635	-0.205359	0.091616	-2.24152	0.0249923	0.497825
PTPRH	5794	NC_000019	chr19	-	55181247	55209506	4370	45.637	-0.342351	0.152796	-2.24057	0.0250537	0.498463
DNAJC17	55192	NC_000015	chr15	-	40765155	40807478	5747	180.392	-0.242879	0.108533	-2.23782	0.0252326	0.50056
MX1	4599	NC_000021	chr21	+	41420304	41459214	8837	661.842	-0.245557	0.109736	-2.2377	0.0252404	0.50056
PXDN	7837	NC_000002	chr2	-	1631887	1744852	11237	664.35	-0.313829	0.140289	-2.23701	0.0252858	0.50056
SORCS1	114815	NC_000010	chr10	-	106573663	107164708	10255	735.087	-0.205114	0.091704	-2.23669	0.0253064	0.50056
UAP1L1	91373	NC_000009	chr9	+	137077492	137084543	5296	94.4075	-0.297655	0.13307	-2.23684	0.025297	0.50056
ADORA1	134	NC_000001	chr1	+	203090654	203167405	4251	119.946	-0.303617	0.136035	-2.2319	0.0256213	0.501768
ARHGAP31	57514	NC_000003	chr3	+	119294289	119420714	9560	2626.27	0.207292	0.0929585	2.22994	0.0257514	0.501768
ENSG00000229663	0	NC_000001	chr1	-	248771635	248773792	2158	25.531	0.336783	0.150715	2.23456	0.0254461	0.501768
ENSG00000230787	0	NC_000001	chr1	-	79054945	79056055	1111	197.049	0.291213	0.130434	2.23265	0.0255719	0.501768
ERICH3	127254	NC_000001	chr1	-	74568111	74674329	9080	1753.19	0.216619	0.0970728	2.23151	0.0256476	0.501768
ESYT3	83850	NC_000003	chr3	+	138434573	138481686	9830	439.051	0.270229	0.121117	2.23114	0.0256716	0.501768
HSPB6	126393	NC_000019	chr19	-	35754566	35758079	1636	34.0612	-0.333347	0.149396	-2.2313	0.0256612	0.501768
IQCJ	654502	NC_000003	chr3	+	159069252	159266307	2629	79.282	0.328549	0.147125	2.23313	0.0255403	0.501768
ITGA7	3679	NC_000012	chr12	-	55684568	55716043	6510	1349.35	0.247618	0.110841	2.23398	0.0254842	0.501768
LINC01061	401149	NC_000004	chr4	-	119407967	119409460	1494	105.992	-0.330847	0.148042	-2.23482	0.025429	0.501768
LY6G5B	58496	NC_000006	chr6	+	31670167	31673776	3031	46.1615	-0.342397	0.153335	-2.233	0.0255491	0.501768
SAMD4B	55095	NC_000019	chr19	+	39342396	39385710	8284	1997.58	0.18098	0.0811462	2.23029	0.025728	0.501768
SYNGAP1	8831	NC_000006	chr6	+	33420070	33453689	6581	23992	0.215406	0.0965688	2.2306	0.0257076	0.501768
ZMAT2	153527	NC_000005	chr5	+	140700334	140706676	1660	1050.26	0.153986	0.069104	2.22831	0.0258595	0.503298
AK057925	0	NC_000005	chr5	+	134402083	134411881	732	22.8812	0.340207	0.153006	2.22349	0.0261829	0.503486
ANO3	63982	NC_000011	chr11	+	26189282	26663289	7294	548.002	0.293475	0.132005	2.22321	0.0262016	0.503486
CLDN11	5010	NC_000003	chr3	+	170418865	170860380	9473	1329.56	-0.330341	0.148302	-2.22748	0.025915	0.503486
CNP	1267	NC_000017	chr17	+	41966741	41977740	7314	2634.43	-0.319294	0.143489	-2.22521	0.026067	0.503486
ERVFRD-1	405754	NC_000006	chr6	-	11102489	11111838	3348	36.572	-0.326407	0.146681	-2.22529	0.0260617	0.503486
GOLGA8A	23015	NC_000015	chr15	-	34379068	34437466	6562	113.765	-0.3397	0.15282	-2.22287	0.0262248	0.503486
MCTP2	55784	NC_000015	chr15	+	94231538	94483952	13264	28.3957	-0.341296	0.153431	-2.22442	0.0261203	0.503486
MTMR11	10903	NC_000001	chr1	-	149928651	149936898	4690	142.129	0.331731	0.149152	2.22412	0.0261405	0.503486
NYAP2	57624	NC_000002	chr2	+	225399710	225730755	7062	479.173	0.216738	0.0974437	2.22423	0.0261327	0.503486
RAMP1	10267	NC_000002	chr2	+	237859544	237912114	910	710.942	0.255009	0.11451	2.22697	0.0259495	0.503486
TPR	7175	NC_000001	chr1	-	186311652	186375751	12530	2486.38	-0.104327	0.0469016	-2.22438	0.0261227	0.503486
ZNF827	152485	NC_000004	chr4	-	145757627	145938635	10057	1196.45	0.242805	0.109136	2.22479	0.0260954	0.503486
CHKA	1119	NC_000011	chr11	-	68052859	68121444	7118	478.688	-0.296185	0.133309	-2.2218	0.026297	0.504304
ARG2	384	NC_000014	chr14	+	67619798	67651720	2418	508.558	0.22614	0.101878	2.21971	0.0264381	0.504352
CHRNE	1145	NC_000017	chr17	-	4897769	4903074	2646	212.81	-0.255656	0.115176	-2.21969	0.0264401	0.504352
IRS4	8471	NC_000023	chrX	-	108719949	108736413	6560	476.788	-0.321049	0.14457	-2.22071	0.0263707	0.504352
PRRC2B	84726	NC_000009	chr9	+	131394093	131500197	12296	12061.2	0.139644	0.0629068	2.21985	0.0264289	0.504352
ZNF707	286075	NC_000008	chr8	+	143684452	143713898	6444	20.6774	-0.34065	0.153476	-2.21957	0.026448	0.504352
CTSL	1514	NC_000009	chr9	+	87725519	87731469	2545	854.208	-0.164644	0.0742254	-2.21817	0.0265436	0.505013
HRH3	11255	NC_000020	chr20	-	62214961	62220267	2680	886.076	0.312832	0.14101	2.2185	0.0265205	0.505013
ZNF536	9745	NC_000019	chr19	+	30228290	30710824	9229	657.439	-0.232556	0.104861	-2.21775	0.0265718	0.505013
AMOT	154796	NC_000023	chrX	-	112774503	112840908	9230	2430.79	0.237821	0.107323	2.21594	0.0266955	0.506797
EPHB1	2047	NC_000003	chr3	+	134795257	135260467	5301	385.662	-0.306082	0.138244	-2.21407	0.0268238	0.508663
CRIP2	1397	NC_000014	chr14	+	105472938	105480170	4861	985.81	0.252587	0.114255	2.21073	0.0270548	0.512474
NOS1	4842	NC_000012	chr12	-	117208142	117452170	13203	420.528	0.336881	0.152498	2.20909	0.0271683	0.51405
SLFN5	162394	NC_000017	chr17	+	35243036	35273655	10709	244.64	0.256965	0.116399	2.20763	0.02727	0.5154
CALM2	805	NC_000002	chr2	-	47160082	47176601	6251	2257.4	-0.119529	0.0541913	-2.20568	0.0274061	0.515486
CYP21A2	1589	NC_000006	chr6	+	32035476	32041670	3653	204.502	0.33807	0.153321	2.20498	0.0274556	0.515486
HSPA4	3308	NC_000005	chr5	+	133051962	133106449	5158	3457.66	0.249976	0.113296	2.20639	0.0273567	0.515486
RFXANK	8625	NC_000019	chr19	+	19192199	19201869	2553	339.783	0.224579	0.101852	2.20496	0.0274566	0.515486
SLC31A2	1318	NC_000009	chr9	+	113150942	113164142	6266	37.561	-0.328009	0.148624	-2.20696	0.0273167	0.515486
TRANK1	9881	NC_000003	chr3	-	36826817	36945057	11114	1418.88	-0.253633	0.114983	-2.20583	0.0273956	0.515486
RGS8	85397	NC_000001	chr1	-	182643901	182684576	4623	61.5075	0.322912	0.146488	2.20437	0.0274985	0.515703
FBXO32	114907	NC_000008	chr8	-	123497887	123541253	7444	254.448	-0.286895	0.130198	-2.20353	0.0275572	0.516235
CCDC34	91057	NC_000011	chr11	-	27330387	27363868	4173	115.258	0.268513	0.121946	2.2019	0.0276722	0.517638
ZNF217	7764	NC_000020	chr20	-	53567065	53609907	6513	100.13	0.246051	0.11176	2.20161	0.0276931	0.517638
BMP4	652	NC_000014	chr14	-	53949736	53958761	2257	36.1133	-0.302751	0.137595	-2.2003	0.0277853	0.517921
RAB27B	5874	NC_000018	chr18	+	54717860	54895516	7618	201.099	0.309419	0.140604	2.20063	0.0277619	0.517921
TECTA	7007	NC_000011	chr11	+	121101173	121191493	7426	373.833	-0.27583	0.125371	-2.2001	0.0277996	0.517921
LY75	4065	NC_000002	chr2	-	159803355	159904756	7564	60.704	0.312763	0.142198	2.19949	0.027843	0.518161
LOC100507346	100507346	NC_000009	chr9	+	95463609	95470019	1957	513.438	0.282582	0.128556	2.19812	0.0279402	0.519401
SLIT3	6586	NC_000005	chr5	-	168661733	169301129	14260	1622.93	0.30009	0.136549	2.19766	0.0279731	0.519444
ZNF124	7678	NC_000001	chr1	-	247121975	247172016	4007	145.741	-0.30318	0.138007	-2.19684	0.0280318	0.519966
ANGPTL1	9068	NC_000001	chr1	-	178849535	178871236	3925	28.3253	0.336082	0.153285	2.19253	0.0283411	0.521464
DOCK8	81704	NC_000009	chr9	+	214854	465259	13397	426.636	0.294667	0.134262	2.19471	0.0281845	0.521464
ENSG00000232041	0	NC_000013	chr13	+	73036401	73036848	448	64.7052	0.291415	0.132765	2.19497	0.0281658	0.521464
GPR158-AS1	100128811	NC_000010	chr10	-	25158072	25176276	2433	281.446	-0.24285	0.110752	-2.19275	0.0283256	0.521464
MT1E	4493	NC_000016	chr16	+	56625475	56627112	1046	975.001	0.318612	0.145333	2.1923	0.0283581	0.521464
NGFR	4804	NC_000017	chr17	+	49495293	49515020	3679	26.9636	-0.331786	0.151307	-2.1928	0.028322	0.521464
RTKN	6242	NC_000002	chr2	-	74425836	74442422	5545	363.185	-0.297642	0.135645	-2.19427	0.028216	0.521464
SLC24A3	57419	NC_000020	chr20	+	19212646	19722937	3933	323.611	0.261955	0.119451	2.193	0.0283071	0.521464
ATG2B	55102	NC_000014	chr14	-	96281258	96363870	12489	1631.32	-0.13293	0.0606575	-2.19148	0.0284172	0.521985
NPFFR1	64106	NC_000010	chr10	-	70247329	70283694	8939	30.3676	0.334424	0.152643	2.19089	0.0284598	0.522035
WDR91	29062	NC_000007	chr7	-	135183838	135211564	8609	388.298	-0.189231	0.0863833	-2.19059	0.0284814	0.522035
DTWD2	285605	NC_000005	chr5	-	118836874	118988545	4974	71.5306	-0.31066	0.141933	-2.18878	0.028613	0.523319
PITPNA	5306	NC_000017	chr17	-	1517718	1562816	4454	1238.42	-0.152378	0.0696116	-2.18898	0.0285984	0.523319
THRAP3	9967	NC_000001	chr1	+	36224416	36305357	5199	1586.7	-0.15566	0.071207	-2.18603	0.0288137	0.526423
KCNN3	3782	NC_000001	chr1	-	154697455	154870280	14078	1067.38	0.293912	0.13452	2.18489	0.0288968	0.527374
FAM222A	84915	NC_000012	chr12	+	109714228	109770507	3836	92.5378	-0.295937	0.135499	-2.18406	0.0289578	0.527921
DLL1	28514	NC_000006	chr6	-	170282200	170291078	3787	479.382	-0.310344	0.142133	-2.18347	0.0290009	0.528139
GSKIP	51527	NC_000014	chr14	+	96363452	96387290	4569	70.4342	0.294159	0.134802	2.18216	0.0290978	0.529338
DNAH9	1770	NC_000017	chr17	+	11598431	11969748	16604	291.066	0.223239	0.102376	2.18058	0.0292144	0.53089
IGSF11	152404	NC_000003	chr3	-	118900557	119146068	4183	512.683	0.192248	0.0882137	2.17934	0.0293063	0.531991
PRKG2	5593	NC_000004	chr4	-	81087370	81215117	5132	177.326	0.274588	0.126078	2.17792	0.0294117	0.533334
NR3C1	2908	NC_000005	chr5	-	143277931	143733756	12618	3820.66	-0.189054	0.0868386	-2.17707	0.0294753	0.533349
PPP1R3G	648791	NC_000006	chr6	+	5084581	5089487	4907	42.7955	0.332946	0.152914	2.17733	0.0294557	0.533349
CCDC152	100129792	NC_000005	chr5	+	42756801	42802437	3508	204.164	-0.303748	0.139605	-2.17576	0.029573	0.53398
HPCAL4	51440	NC_000001	chr1	-	39678648	39691710	4983	3171.81	0.300187	0.137947	2.17611	0.0295472	0.53398
CTGF	1490	NC_000006	chr6	-	131948176	131951378	2345	254.801	-0.330682	0.152068	-2.17456	0.0296633	0.535041
ENSG00000214455	0	NC_000013	chr13	-	45390353	45391267	915	185.167	0.317409	0.145999	2.17405	0.0297014	0.535161
ANAPC1	64682	NC_000002	chr2	-	111766271	111884690	13346	553.401	-0.160594	0.0740269	-2.16941	0.0300518	0.536386
FAM90A12	0	NC_000008	chr8	-	8027077	8032305	2375	33.063	-0.151642	0.0699404	-2.16817	0.030146	0.536386
GRB14	2888	NC_000002	chr2	-	164492812	164621850	2952	89.5885	0.314432	0.144823	2.17115	0.0299199	0.536386
HSPH1	10808	NC_000013	chr13	-	31134974	31163109	7699	3472.47	0.249229	0.11493	2.16854	0.0301179	0.536386
LOC643327	643327	NC_000006	chr6	+	3455703	3468912	3005	191.78	-0.273767	0.126266	-2.16818	0.0301447	0.536386
MT1G	4495	NC_000016	chr16	-	56666731	56668065	409	307.478	0.332594	0.153312	2.16939	0.0300534	0.536386
MT1M	4499	NC_000016	chr16	+	56632233	56633986	829	317.585	0.332181	0.153126	2.16934	0.0300571	0.536386
SAYSD1	55776	NC_000006	chr6	-	39104064	39115189	6609	69.1476	0.260772	0.12024	2.16876	0.0301007	0.536386
SH3RF3	344558	NC_000002	chr2	+	109129348	109504632	6204	939.997	0.172497	0.079511	2.16947	0.0300467	0.536386
TMEM233	387890	NC_000012	chr12	+	119593459	119643066	3292	47.9587	0.321233	0.148161	2.16814	0.0301483	0.536386
TRIM8	81603	NC_000010	chr10	+	102643425	102658407	3987	1313.65	0.233602	0.107616	2.1707	0.0299541	0.536386
WFIKKN2	124857	NC_000017	chr17	+	50834650	50842348	4137	54.1233	-0.253899	0.116969	-2.17066	0.0299573	0.536386
C9orf172	389813	NC_000009	chr9	+	136844415	136848801	4387	3210.12	0.196598	0.0908084	2.16498	0.0303895	0.539041
GRIN2B	2904	NC_000012	chr12	-	13537337	13980119	30111	9998.7	0.210698	0.0973053	2.16533	0.0303625	0.539041
TMEM68	137695	NC_000008	chr8	-	55696424	55773407	8574	51.6599	0.302356	0.139661	2.16493	0.0303927	0.539041
KCNK13	56659	NC_000014	chr14	+	90061765	90185857	2522	35.3509	0.331653	0.153307	2.16332	0.0305164	0.540671
AMZ2	51321	NC_000017	chr17	+	68205988	68257164	4465	668.267	-0.195922	0.0906015	-2.16245	0.0305832	0.540727
SPR	6697	NC_000002	chr2	+	72887111	72892160	2099	118.124	0.315697	0.145971	2.16274	0.0305609	0.540727
PICK1	9463	NC_000022	chr22	+	38056311	38075701	5181	974.532	-0.241847	0.11191	-2.16109	0.0306883	0.542022
CPED1	79974	NC_000007	chr7	+	120988677	121297444	7584	79.4054	0.314422	0.145522	2.16064	0.0307229	0.54207
ATP5S	27109	NC_000014	chr14	+	50311539	50335558	11746	194.185	-0.212939	0.0985757	-2.16015	0.0307609	0.542177
CACNA2D2	9254	NC_000003	chr3	-	50362799	50504244	6323	437.028	-0.264441	0.122449	-2.1596	0.0308038	0.54237
TIMP2	7077	NC_000017	chr17	-	78852977	78925390	5622	2237.67	0.277755	0.128643	2.15911	0.030842	0.54248
REC8	9985	NC_000014	chr14	+	24171853	24180257	3742	187.88	0.227002	0.105161	2.15862	0.0308796	0.542581
LOC100129534	100129534	NC_000001	chr1	-	2350414	2352820	2407	261.86	-0.230332	0.106899	-2.15466	0.0311887	0.546317
NDST3	9348	NC_000004	chr4	+	118033522	118258648	7105	535.831	0.277084	0.128581	2.15493	0.0311673	0.546317
PI4K2B	55300	NC_000004	chr4	+	25160663	25279209	3781	76.1234	0.279608	0.129759	2.15482	0.0311756	0.546317
CA12	771	NC_000015	chr15	-	63321378	63382161	7313	72.5192	0.329818	0.153123	2.15394	0.0312445	0.54673
CTTNBP2	83992	NC_000007	chr7	-	117710648	117873507	6815	1295.61	-0.219475	0.101966	-2.15243	0.0313631	0.547678
EFR3B	22979	NC_000002	chr2	+	25042104	25159137	10617	3398.6	0.214552	0.0996724	2.15257	0.0313525	0.547678
ALDH1A3	220	NC_000015	chr15	+	100879376	100916626	6420	165.559	-0.319359	0.148439	-2.15144	0.0314413	0.547917
MYO5A	4644	NC_000015	chr15	-	52307283	52529050	15188	13140.3	-0.122326	0.0568503	-2.15171	0.03142	0.547917
STXBP3	6814	NC_000001	chr1	+	108746663	108809526	5906	362.136	0.179673	0.0835349	2.15087	0.0314864	0.54814
SEZ6L	23544	NC_000022	chr22	+	26169474	26383597	6996	3817.75	0.261873	0.121795	2.15012	0.0315459	0.548615
MOSPD2	158747	NC_000023	chrX	+	14873405	14922327	4841	87.3457	0.261258	0.121541	2.14954	0.0315917	0.548849
SRPX	8406	NC_000023	chrX	-	38149335	38220924	1988	38.848	0.329079	0.153146	2.14879	0.031651	0.549318
RNF144A	9781	NC_000002	chr2	+	6917392	7044182	6647	301.15	-0.23783	0.110819	-2.1461	0.0318646	0.552461
MAP6D1	79929	NC_000003	chr3	-	183815876	183825605	2138	139.018	-0.288692	0.134572	-2.14526	0.031932	0.552502
PLEKHO2	80301	NC_000015	chr15	+	64841883	64922481	4287	473.424	0.190016	0.0885615	2.14558	0.0319061	0.552502
DISP2	85455	NC_000015	chr15	+	40358233	40500646	5504	2097.07	0.215279	0.100406	2.14409	0.0320259	0.552534
ENSG00000230614	0	NC_000007	chr7	-	85381118	85381375	258	276.841	0.282456	0.131791	2.14321	0.0320965	0.552534
KLK7	5650	NC_000019	chr19	-	50976479	50984099	2437	362.637	0.323501	0.150906	2.14373	0.0320544	0.552534
lncRNA-CIR	0	NC_000006	chr6	-	126602356	126603649	1294	64.274	0.327522	0.152792	2.14357	0.032067	0.552534
TMEM63C	57156	NC_000014	chr14	+	77098311	77259495	6603	1326.44	-0.228453	0.10654	-2.14429	0.0320097	0.552534
C11orf63	79864	NC_000011	chr11	+	122882528	122959798	5303	211.082	0.26582	0.124174	2.14071	0.0322973	0.553747
CCDC183	84960	NC_000009	chr9	+	136796338	136810035	3975	134.43	-0.308135	0.143899	-2.14133	0.0322474	0.553747
CHMP1A	5119	NC_000016	chr16	-	89644431	89657845	3208	504.93	0.264621	0.123583	2.14124	0.0322544	0.553747
GPR3	2827	NC_000001	chr1	+	27392644	27395814	2115	31.6645	-0.291387	0.136095	-2.14105	0.0322698	0.553747
ATAD3B	83858	NC_000001	chr1	+	1471759	1509472	7960	237.185	-0.27653	0.129554	-2.13447	0.0328043	0.555091
CECR2	27443	NC_000022	chr22	+	17359949	17562040	12313	338.404	-0.274936	0.128723	-2.13588	0.0326893	0.555091
DGKG	1608	NC_000003	chr3	-	186147201	186362237	10814	846.409	0.257039	0.12031	2.13647	0.032641	0.555091
ENSG00000255457	0	NC_000008	chr8	+	13695574	13705506	270	60.8295	-0.292896	0.137155	-2.1355	0.0327201	0.555091
FGFR2	2263	NC_000010	chr10	-	121478330	121598458	7053	1666.97	-0.229078	0.107341	-2.13412	0.032833	0.555091
HNRNPDL	9987	NC_000004	chr4	-	82422564	82430225	5295	2528.37	-0.232208	0.108644	-2.13733	0.0325713	0.555091
HSP90B1	7184	NC_000012	chr12	+	103930334	103947930	4204	3754.2	0.275895	0.129041	2.13805	0.0325129	0.555091
LOC100128164	100128164	NC_000003	chr3	-	169943984	169966734	7012	97.1718	0.271248	0.127014	2.13558	0.0327135	0.555091
NFASC	23114	NC_000001	chr1	+	204828651	205022822	21086	8478.03	-0.194081	0.0907299	-2.1391	0.0324272	0.555091
PPARG	5468	NC_000003	chr3	+	12287368	12434356	4074	114.494	0.297327	0.139165	2.1365	0.0326383	0.555091
SOX2	6657	NC_000003	chr3	+	181711924	181714436	2513	6497.95	0.202402	0.0946344	2.13877	0.0324541	0.555091
STBD1	8987	NC_000004	chr4	+	76306026	76311599	4703	71.1631	0.272009	0.127411	2.13489	0.03277	0.555091
TJAP1	93643	NC_000006	chr6	+	43477523	43506556	8127	354.139	-0.244907	0.114697	-2.13525	0.0327406	0.555091
TUBB	203068	NC_000006	chr6	+	30720201	30725426	3359	4287.4	0.190947	0.08936	2.13683	0.0326117	0.555091
AGAP7P	653268	NC_000010	chr10	+	46109495	46131671	2501	31.412	0.225021	0.105484	2.13324	0.0329054	0.555761
KRBOX4	55634	NC_000023	chrX	+	46446857	46474639	4602	208.571	0.24102	0.113031	2.13233	0.0329794	0.556457
DACH2	117154	NC_000023	chrX	+	86148451	86832604	7046	135.873	0.247586	0.116186	2.13094	0.0330938	0.556729
R3HDM2	22864	NC_000012	chr12	-	57249609	57431005	6623	3014.45	-0.154319	0.0723946	-2.13164	0.0330365	0.556729
SCN3B	55800	NC_000011	chr11	-	123629187	123655006	8983	2280.34	0.281173	0.13193	2.13124	0.0330695	0.556729
C2CD4C	126567	NC_000019	chr19	-	405438	409170	3206	108.442	0.301517	0.14159	2.12951	0.0332118	0.558162
EMX1	2016	NC_000002	chr2	+	72917475	72936071	5526	192.477	-0.278491	0.13086	-2.12817	0.0333232	0.558378
RILPL2	196383	NC_000012	chr12	-	123410683	123436717	6141	249.409	0.238775	0.112194	2.12823	0.0333183	0.558378
TRIM37	4591	NC_000017	chr17	-	58982638	59106921	5482	2994.35	-0.139357	0.0654794	-2.12826	0.0333157	0.558378
DCLK3	85443	NC_000003	chr3	-	36712422	36739861	5344	48.7156	0.32567	0.153083	2.1274	0.0333866	0.558888
ADAMTS16	170690	NC_000005	chr5	+	5140330	5320304	5781	163.059	0.314873	0.148051	2.12678	0.0334381	0.5592
CIR1	9541	NC_000002	chr2	-	174348022	174395715	2817	580.561	-0.14875	0.0699798	-2.12561	0.0335356	0.560278
FOXF2	2295	NC_000006	chr6	+	1389834	1395597	2187	372.87	0.288986	0.136006	2.1248	0.033603	0.560853
DACH1	1602	NC_000013	chr13	-	71437966	71867192	5233	106.495	-0.310882	0.146371	-2.12392	0.0336767	0.561392
USP32P1	162632	NC_000017	chr17	+	16786489	16804505	7562	80.0585	-0.321645	0.15146	-2.12363	0.0337014	0.561392
MLLT1	4298	NC_000019	chr19	-	6210379	6279948	4740	1258.82	0.175978	0.0828822	2.12323	0.0337348	0.561398
C11orf80	79703	NC_000011	chr11	+	66744736	66843516	3628	260.429	0.214646	0.101132	2.12244	0.0338011	0.561402
TMSL4	0	NC_000009	chr9	+	128342153	128342770	618	40.7719	0.314727	0.148265	2.12273	0.0337761	0.561402
ENSG00000265279	0	NC_000018	chr18	-	32196026	32196966	941	36.7671	0.295399	0.139304	2.12052	0.0339619	0.562534
NR2C1	7181	NC_000012	chr12	-	95020229	95073703	8599	276.078	-0.292503	0.137908	-2.121	0.0339216	0.562534
RNASE1	6035	NC_000014	chr14	-	20801228	20803278	1506	732.284	-0.32055	0.151171	-2.12044	0.0339686	0.562534
HSP90BB	0	NC_000004	chr4	+	13333414	13338657	2299	266.046	0.246237	0.116149	2.12001	0.0340055	0.562564
RCN1	5954	NC_000011	chr11	+	31816384	32105755	4740	328.234	0.314342	0.1483	2.11964	0.0340366	0.562564
ANKS1A	23294	NC_000006	chr6	+	34889261	35091413	10824	1413.01	-0.154393	0.0728713	-2.1187	0.0341157	0.563323
CAMK2G	818	NC_000010	chr10	-	73812501	73874591	7904	3126.99	-0.192831	0.0910931	-2.11685	0.0342724	0.563646
H6PD	9563	NC_000001	chr1	+	9234764	9271337	9982	3523.31	-0.216722	0.102396	-2.11651	0.0343011	0.563646
PCDHGC3	5098	NC_000005	chr5	+	141475947	141512979	5218	9754.47	0.220588	0.104174	2.11749	0.0342181	0.563646
SLC1A6	6511	NC_000019	chr19	-	14950033	15022990	7081	169.337	0.315974	0.149253	2.11704	0.0342562	0.563646
ZYX	7791	NC_000007	chr7	+	143361717	143391111	3281	844.073	-0.305049	0.144056	-2.11757	0.0342113	0.563646
CSDC2	27254	NC_000022	chr22	+	41560763	41576666	2777	67.3113	0.293038	0.138626	2.11388	0.0345253	0.564804
ENSG00000214335	0	NC_000013	chr13	+	58528615	58531026	2412	37.0322	0.323924	0.153255	2.11363	0.0345469	0.564804
LINC01002	100132062	NC_000007	chr7	+	128653014	128653553	540	111.666	-0.246741	0.116695	-2.11441	0.0344804	0.564804
RCL1	10171	NC_000009	chr9	+	4792834	4885917	4093	192.788	-0.261442	0.123679	-2.11387	0.0345265	0.564804
TNKS2	80351	NC_000010	chr10	+	91798312	91865475	6653	1149.41	0.179519	0.0848994	2.11449	0.0344735	0.564804
WSB1	26118	NC_000017	chr17	+	27294080	27313633	5967	1136.19	-0.286437	0.135553	-2.1131	0.0345924	0.564804
ZNF713	349075	NC_000007	chr7	+	55887476	55942225	6155	148.734	0.237771	0.11253	2.11296	0.0346042	0.564804
FAM49B	51571	NC_000008	chr8	-	129839593	130017129	9131	576.114	-0.221345	0.104808	-2.11191	0.0346941	0.565587
GLUD2	2747	NC_000023	chrX	+	121047588	121050080	2493	7959.39	0.239742	0.113535	2.11162	0.0347188	0.565587
C3AR1	719	NC_000012	chr12	-	8058302	8066471	2145	51.1912	0.322293	0.152778	2.10955	0.0348974	0.567725
SNAP25	6616	NC_000020	chr20	+	10218694	10307418	7030	8787.86	-0.263247	0.124802	-2.10932	0.0349169	0.567725
TRIM54	57159	NC_000002	chr2	+	27282392	27307439	3583	44.789	-0.322303	0.15291	-2.10779	0.0350488	0.569326
C8orf62	0	NC_000008	chr8	-	49740216	49741321	1106	208.319	0.238725	0.113502	2.10326	0.0354432	0.570279
ENSG00000237752	0	NC_000023	chrX	+	97906644	97908090	1447	125.708	0.258784	0.122912	2.10543	0.0352535	0.570279
EXTL2	2135	NC_000001	chr1	-	100872372	100895998	4935	177.715	-0.290135	0.137943	-2.1033	0.0354395	0.570279
FABP7	2173	NC_000006	chr6	+	122779475	122784074	4177	266.002	0.314722	0.149588	2.10392	0.0353854	0.570279
HS6ST2	90161	NC_000023	chrX	-	132626010	132961395	4850	246.805	0.228437	0.108598	2.10352	0.03542	0.570279
PEX5L	51555	NC_000003	chr3	-	179794958	180037053	10794	2946.71	-0.175887	0.0836241	-2.10331	0.0354387	0.570279
SLC35E2B	728661	NC_000001	chr1	-	1659529	1692804	8716	346.39	0.222802	0.105803	2.10581	0.0352209	0.570279
SPRED1	161742	NC_000015	chr15	+	38252315	38357249	8243	1429.4	0.240951	0.114372	2.10673	0.0351411	0.570279
STARD9	57519	NC_000015	chr15	+	42575634	42720998	20753	693.741	-0.287045	0.136384	-2.10468	0.0353189	0.570279
XKR6	286046	NC_000008	chr8	-	10896144	11201366	4230	141.026	-0.240654	0.114298	-2.10549	0.0352486	0.570279
CLCN2	1181	NC_000003	chr3	-	184346185	184361651	4290	226.194	-0.243413	0.115876	-2.10063	0.0356735	0.570742
FOXP2	93986	NC_000007	chr7	+	114086310	114693772	14140	321.845	-0.307411	0.146251	-2.10194	0.0355586	0.570742
NTN4	59277	NC_000012	chr12	-	95657807	95791152	3656	182.438	-0.242551	0.115461	-2.10072	0.0356655	0.570742
NUB1	51667	NC_000007	chr7	+	151341699	151378461	7261	373.041	-0.205954	0.0980399	-2.10072	0.0356657	0.570742
PVRIG2P	101752334	NC_000007	chr7	+	100352318	100353936	1264	75.5447	-0.321833	0.153137	-2.1016	0.0355881	0.570742
RNF113A	7737	NC_000023	chrX	-	119870475	119871828	1354	81.7237	-0.246989	0.117554	-2.10107	0.0356348	0.570742
LFNG	3955	NC_000007	chr7	+	2512529	2529177	3418	191.018	0.28583	0.136169	2.09908	0.0358101	0.572389
CCNI	10983	NC_000004	chr4	-	77047158	77076005	3741	4464.48	-0.214847	0.102386	-2.0984	0.0358697	0.572802
ABHD1	84696	NC_000002	chr2	+	27123764	27130991	4834	34.881	-0.305261	0.145509	-2.09788	0.0359161	0.573005
ZNF625	90589	NC_000019	chr19	-	12144890	12156731	1699	46.9173	-0.30962	0.147713	-2.09609	0.036074	0.574985
ADAM11	4185	NC_000017	chr17	+	44759031	44781846	5269	660.962	-0.189481	0.0904193	-2.09558	0.0361195	0.57517
ATXN2	6311	NC_000012	chr12	-	111452214	111599676	13874	4933.83	-0.13181	0.0630101	-2.09188	0.036449	0.575316
C4A	720	NC_000006	chr6	+	32014795	32035400	2055	2486.73	0.279683	0.134031	2.0867	0.0369153	0.575316
CCDC84	338657	NC_000011	chr11	+	118998133	119015793	5116	343.703	-0.272389	0.130535	-2.08671	0.0369142	0.575316
ENSG00000278603	0	NC_000015	chr15	+	82459472	82477258	7184	24.0128	-0.320215	0.152887	-2.09446	0.0362195	0.575316
ESCO1	114799	NC_000018	chr18	-	21529281	21600884	5288	228.475	-0.256429	0.122652	-2.09071	0.0365538	0.575316
FBLN1	2192	NC_000022	chr22	+	45502839	45602817	10990	754.439	0.264155	0.126457	2.08889	0.0367176	0.575316
FSTL5	56884	NC_000004	chr4	-	161383892	162164035	5015	371.091	0.261506	0.124979	2.09241	0.0364022	0.575316
HSD11B1L	374875	NC_000019	chr19	+	5680604	5688523	2907	583.845	0.208968	0.0998198	2.09345	0.036309	0.575316
N4BP3	23138	NC_000005	chr5	+	178113443	178126106	6222	89.9298	-0.29113	0.139094	-2.09304	0.0363452	0.575316
NUAK1	9891	NC_000012	chr12	-	106063340	106140033	6828	3162.7	-0.208788	0.0998574	-2.09086	0.0365408	0.575316
PDE6B	5158	NC_000004	chr4	+	625574	670892	4841	336.835	-0.308843	0.147821	-2.0893	0.0366808	0.575316
PDIA5	10954	NC_000003	chr3	+	123067009	123162106	3366	56.5574	-0.319254	0.152848	-2.0887	0.0367347	0.575316
PTER	9317	NC_000010	chr10	+	16436943	16513745	4100	327.257	0.289768	0.138412	2.09351	0.0363039	0.575316
PTTG1IP	754	NC_000021	chr21	-	44849585	44873903	4414	363.451	0.229477	0.109985	2.08644	0.0369389	0.575316
RASA4CP	401331	NC_000007	chr7	-	44026951	44041892	5529	244.38	-0.241966	0.11576	-2.09024	0.0365959	0.575316
RASGEF1B	153020	NC_000004	chr4	-	81426393	82044963	7339	115.063	-0.241736	0.115862	-2.08641	0.0369413	0.575316
SMOX	54498	NC_000020	chr20	+	4120980	4187747	5620	544.806	0.256193	0.122653	2.08877	0.0367285	0.575316
SNX29P2	440352	NC_000016	chr16	+	29251508	29422399	7056	58.4114	-0.317218	0.151871	-2.08874	0.0367315	0.575316
SPATA6	54558	NC_000001	chr1	-	48260553	48472208	9239	172.622	-0.24042	0.115089	-2.08899	0.036709	0.575316
TANGO2	128989	NC_000022	chr22	+	20017000	20065926	8266	315.604	-0.171753	0.0820884	-2.0923	0.0364118	0.575316
TMBIM6	7009	NC_000012	chr12	+	49707725	49764934	6211	2522.73	0.170548	0.0817145	2.08712	0.0368772	0.575316
TMEM254	80195	NC_000010	chr10	+	80078442	80092557	3444	115.819	0.275206	0.131507	2.09271	0.0363751	0.575316
TMEM87B	84910	NC_000002	chr2	+	112055223	112119318	5330	160.734	0.2313	0.110758	2.08834	0.0367675	0.575316
TNK1	8711	NC_000017	chr17	+	7380534	7389774	3958	32.441	-0.320226	0.153389	-2.08767	0.0368276	0.575316
ENSG00000234518	0	NC_000001	chr1	-	89104285	89104767	483	272.514	0.241101	0.115581	2.08599	0.0369794	0.575382
PTGER3	5733	NC_000001	chr1	-	70852353	71047808	10430	39.7252	0.301775	0.144716	2.0853	0.0370423	0.575578
SLC41A1	254428	NC_000001	chr1	-	205789093	205813759	6368	782.168	0.203385	0.0975419	2.0851	0.0370598	0.575578
NSMF	26012	NC_000009	chr9	-	137447570	137459356	4989	11084.7	0.238684	0.114525	2.08411	0.0371499	0.575924
TBC1D13	54662	NC_000009	chr9	+	128787204	128810432	3982	870.795	0.19132	0.0917833	2.08447	0.0371173	0.575924
MCM4	4173	NC_000008	chr8	+	47960203	47978160	7383	717.358	-0.183986	0.0883228	-2.08311	0.0372415	0.576789
PPP2CA	5515	NC_000005	chr5	-	134194334	134226259	5527	1740.14	-0.137788	0.0661567	-2.08276	0.0372735	0.576789
GRIK3	2899	NC_000001	chr1	-	36795527	37034243	10225	652.745	-0.287077	0.137953	-2.08098	0.037436	0.5772
IDE	3416	NC_000010	chr10	-	92451684	92574095	7626	319.313	-0.204157	0.0980952	-2.08121	0.0374144	0.5772
NPNT	255743	NC_000004	chr4	+	105895432	105971674	5690	110.519	0.316123	0.151866	2.0816	0.0373793	0.5772
TOM1L1	10040	NC_000017	chr17	+	54900513	54961967	5405	293.271	0.223323	0.107304	2.08122	0.037414	0.5772
THRA	7067	NC_000017	chr17	+	40058290	40093867	6959	5311.23	0.228243	0.109701	2.08059	0.0374717	0.577227
ENSG00000251441	0	NC_000004	chr4	+	112356135	112359819	3685	94.1312	-0.296666	0.142617	-2.08016	0.0375112	0.577312
ZNF620	253639	NC_000003	chr3	+	40505959	40518736	3552	36.3796	-0.30648	0.147374	-2.07961	0.0375615	0.577564
RHBDD1	84236	NC_000002	chr2	+	226835581	226999215	14993	218.218	0.174159	0.0837782	2.07882	0.0376344	0.57816
FAM151B	167555	NC_000005	chr5	+	80487969	80542563	3129	46.3181	0.279368	0.134416	2.07838	0.0376742	0.578249
ATG16L2	89849	NC_000011	chr11	+	72814308	72842676	5690	294.401	-0.184326	0.0887953	-2.07586	0.037907	0.579729
DNAH10OS	642797	NC_000012	chr12	-	123926424	123934984	5040	216.467	0.252896	0.121778	2.0767	0.0378294	0.579729
ISLR	3671	NC_000015	chr15	+	74173671	74176872	2672	76.9731	-0.31842	0.153371	-2.07614	0.0378812	0.579729
WDR49	151790	NC_000003	chr3	-	167478684	167653940	3848	83.0698	0.28942	0.139414	2.07598	0.0378962	0.579729
BTBD9	114781	NC_000006	chr6	-	38168451	38640426	9934	1285.52	0.221443	0.106802	2.07339	0.0381356	0.579858
ENSG00000213197	0	NC_000002	chr2	+	152389937	152390630	694	261.638	0.164904	0.0794581	2.07535	0.0379537	0.579858
FOXK1	221937	NC_000007	chr7	+	4682299	4771443	12667	1406.21	0.159203	0.0767515	2.07427	0.0380545	0.579858
GDPD1	284161	NC_000017	chr17	+	59220467	59275970	3913	203.503	-0.235607	0.113645	-2.07319	0.0381544	0.579858
PIK3CB	5291	NC_000003	chr3	-	138652698	138834938	7851	890.619	-0.170193	0.0820767	-2.07359	0.0381173	0.579858
WNT2B	7482	NC_000001	chr1	+	112466541	112530165	12591	151.204	-0.299545	0.144462	-2.07352	0.0381241	0.579858
ZNF256	10172	NC_000019	chr19	-	57940833	57947709	2210	467.854	-0.198055	0.0955198	-2.07345	0.0381307	0.579858
ENSG00000248565	0	NC_000004	chr4	-	124462863	124463790	928	288.283	0.185053	0.0893032	2.07219	0.0382476	0.580724
RPL13AP6	644511	NC_000010	chr10	-	110936603	110937255	653	34.8651	-0.297244	0.143468	-2.07185	0.0382797	0.580724
KLHL13	90293	NC_000023	chrX	-	117897813	118117340	7464	143.344	0.30794	0.148706	2.0708	0.0383775	0.58117
ZC3H10	84872	NC_000012	chr12	+	56118159	56127514	8464	58.2498	-0.25511	0.123187	-2.07092	0.0383665	0.58117
VWC2	375567	NC_000007	chr7	+	49773661	49921951	11300	97.0507	-0.253036	0.122228	-2.0702	0.0384333	0.581496
C5orf55	116349	NC_000005	chr5	-	441498	443160	1663	31.7905	-0.313744	0.151739	-2.06765	0.0386729	0.581723
CACNA1G	8913	NC_000017	chr17	+	50561068	50629625	10421	1786.84	-0.284362	0.137564	-2.06713	0.0387215	0.581723
CNIH2	254263	NC_000011	chr11	+	66278199	66285301	1884	1167	0.279617	0.135243	2.06752	0.0386852	0.581723
FANCF	2188	NC_000011	chr11	-	22622519	22626787	4269	831.196	0.192179	0.0928855	2.06899	0.0385473	0.581723
GDPD2	54857	NC_000023	chrX	+	70423031	70433391	2917	151.756	0.273771	0.132397	2.06781	0.038658	0.581723
MAPK13	5603	NC_000006	chr6	+	36127809	36144524	7197	191.152	-0.254926	0.123319	-2.0672	0.0387151	0.581723
TEKT2	27285	NC_000001	chr1	+	36084075	36088276	2022	53.0952	0.277281	0.134139	2.06713	0.0387222	0.581723
ZNF232	7775	NC_000017	chr17	-	5105541	5123116	2794	105.53	-0.260652	0.126042	-2.06799	0.0386414	0.581723
ANKRD36BP1	84832	NC_000001	chr1	-	168245565	168247430	1866	173.747	0.284112	0.137488	2.06645	0.0387864	0.581968
CATSPER2	117155	NC_000015	chr15	-	43628503	43668118	8403	337.237	-0.309949	0.150073	-2.06532	0.0388925	0.581968
CHML	1122	NC_000001	chr1	-	241628853	241636194	7342	427.268	-0.248353	0.120251	-2.06529	0.0388956	0.581968
ENSG00000174028	0	NC_000023	chrX	+	23075758	23076767	681	634.689	-0.206513	0.0999978	-2.06517	0.0389065	0.581968
ENSG00000236942	0	NC_000001	chr1	+	205625483	205626153	353	285.853	0.241556	0.117009	2.06442	0.0389783	0.581968
GJA5	2702	NC_000001	chr1	-	147756199	147781054	3680	144.293	-0.314372	0.15225	-2.06483	0.0389388	0.581968
OTUB2	78990	NC_000014	chr14	+	94023165	94048930	4271	79.7666	0.298638	0.144642	2.06468	0.0389536	0.581968
EFHC2	80258	NC_000023	chrX	-	44146303	44343818	5088	61.1611	0.281113	0.13624	2.06337	0.0390779	0.58244
INPP5F	22876	NC_000010	chr10	+	119726047	119829278	6593	1485.62	-0.196278	0.0951255	-2.06336	0.0390784	0.58244
AP1S1	1174	NC_000007	chr7	+	101154397	101161596	1411	774.612	0.257147	0.12465	2.06296	0.0391165	0.582497
ENSG00000250982	0	NC_000016	chr16	-	28239693	28240668	976	313.865	-0.200264	0.0971833	-2.06068	0.0393332	0.583678
GXL_826863	0	NC_000007	chr7	+	100336125	100367398	3083	943.127	-0.280682	0.136199	-2.06082	0.0393201	0.583678
KCNQ5	56479	NC_000006	chr6	+	72621792	73198851	6844	4105.65	-0.215733	0.104662	-2.06123	0.0392808	0.583678
SRIL	0	NC_000004	chr4	+	58103147	58103434	288	58.5923	0.277019	0.134363	2.06172	0.039234	0.583678
ENSG00000226148	0	NC_000001	chr1	+	202796030	202797094	1065	24.5279	-0.3147	0.152797	-2.0596	0.0394371	0.58427
MYCL	4610	NC_000001	chr1	-	39895424	39902256	5067	31.6934	0.311908	0.151445	2.05955	0.0394419	0.58427
SETD6	79918	NC_000016	chr16	+	58514781	58521181	6187	388.341	-0.202922	0.0985936	-2.05816	0.0395746	0.585725
AK124777	0	NC_000009	chr9	+	133701803	133705505	3601	45.2973	-0.30525	0.14847	-2.05597	0.0397851	0.585904
F2R	2149	NC_000005	chr5	+	76716043	76735781	3821	64.6483	0.305594	0.148686	2.0553	0.0398501	0.585904
GOLGA1	2800	NC_000009	chr9	-	124878294	124948013	5431	257.189	-0.18776	0.0913507	-2.05538	0.0398426	0.585904
LPPR3	79948	NC_000019	chr19	-	812488	821977	2741	600.402	0.310459	0.150935	2.0569	0.0396956	0.585904
MYLK3	91807	NC_000016	chr16	-	46702282	46790407	10795	41.3516	0.308697	0.150257	2.05446	0.0399315	0.585904
OSBPL10	114884	NC_000003	chr3	-	31657890	32077580	11286	583.236	-0.258085	0.125554	-2.05557	0.0398241	0.585904
PTGR2	145482	NC_000014	chr14	+	73851831	73886827	8792	142.941	0.270082	0.131366	2.05595	0.0397878	0.585904
RNASET2	8635	NC_000006	chr6	-	166929504	166957191	9954	426.96	0.247553	0.120485	2.05463	0.0399149	0.585904
SLC33A1	9197	NC_000003	chr3	-	155821024	155854459	10935	437.761	0.167827	0.0816778	2.05475	0.0399031	0.585904
VIM	7431	NC_000010	chr10	+	17227935	17237593	5729	6266.05	0.30095	0.14626	2.05764	0.0396246	0.585904
AK095541	0	NC_000009	chr9	-	33025350	33039907	2251	4337.62	0.239295	0.11654	2.05333	0.0400402	0.586301
HIST1H1D	3007	NC_000006	chr6	-	26234212	26234988	777	89.9436	-0.30667	0.149369	-2.05311	0.0400621	0.586301
ROM1	6094	NC_000011	chr11	+	62612741	62615120	1878	254.789	0.288899	0.140685	2.05352	0.0400221	0.586301
BTF3L4	91408	NC_000001	chr1	+	52056125	52090716	5583	26.4646	0.305368	0.148824	2.05188	0.0401814	0.587035
CHST14	113189	NC_000015	chr15	+	40470961	40474571	3611	103.204	0.224701	0.109499	2.05209	0.0401612	0.587035
RBMS1	5937	NC_000002	chr2	-	160272151	160493855	11906	66.6267	-0.294703	0.143657	-2.05144	0.0402245	0.587155
RNF150	57484	NC_000004	chr4	-	140859807	141212877	11020	556.292	0.240644	0.117325	2.05108	0.0402587	0.587155
ANKDD1A	348094	NC_000015	chr15	+	64911902	64958700	5045	470.863	0.208365	0.101691	2.04901	0.0404611	0.587809
CHRM2	1129	NC_000007	chr7	+	136868652	137020255	8363	126.001	-0.308282	0.150545	-2.04778	0.0405818	0.587809
GAPDHL4	0	NC_000004	chr4	+	87207092	87208086	995	225.873	-0.240315	0.117373	-2.04745	0.0406143	0.587809
GPIHBP1	338328	NC_000008	chr8	+	143213193	143217170	2282	163.763	-0.313966	0.153287	-2.04822	0.0405383	0.587809
HDAC1	3065	NC_000001	chr1	+	32292086	32333635	4321	242.137	0.21413	0.104512	2.04885	0.0404767	0.587809
HEPH	9843	NC_000023	chrX	+	66162549	66268867	7497	628.239	0.243409	0.118905	2.04709	0.0406495	0.587809
PCSK7	9159	NC_000011	chr11	-	117195613	117232525	26417	482.31	-0.276759	0.135101	-2.04854	0.0405072	0.587809
ROS1	6098	NC_000006	chr6	-	117287932	117425855	8224	190.269	-0.280215	0.136751	-2.0491	0.0404526	0.587809
SCN3A	6328	NC_000002	chr2	-	165087520	165204088	9731	3493.14	0.211928	0.103522	2.04717	0.040641	0.587809
SERPINF1	5176	NC_000017	chr17	+	1761959	1777574	2916	850.814	-0.266196	0.129974	-2.04808	0.0405523	0.587809
ERRFI1	54206	NC_000001	chr1	-	8011719	8026333	3162	682.521	-0.248471	0.121413	-2.04649	0.0407082	0.588135
PLOD1	5351	NC_000001	chr1	+	11934205	11975542	5351	2269.98	0.272871	0.133358	2.04615	0.0407412	0.588135
LOC102723897	102723897	NC_000001	chr1	-	184916	200322	2019	118.625	-0.303136	0.148252	-2.04474	0.0408809	0.58965
TMEM56-RWDD3	100527978	NC_000001	chr1	+	95117923	95247225	2463	216.027	0.224957	0.11006	2.04394	0.0409591	0.590276
ARSG	22901	NC_000017	chr17	+	68259182	68440769	7648	306.786	-0.239647	0.117533	-2.03897	0.0414527	0.590693
CRYZ	1429	NC_000001	chr1	-	74705482	74733408	4085	272.216	0.300434	0.147419	2.03796	0.0415538	0.590693
DNAJA1	3301	NC_000009	chr9	+	33025211	33039907	2730	4337.17	0.237387	0.116313	2.04093	0.041258	0.590693
FARP1	10160	NC_000013	chr13	+	98142562	98455176	31787	2401.47	0.220573	0.10812	2.04007	0.0413429	0.590693
FOXN2	3344	NC_000002	chr2	+	48314637	48379295	5831	193.086	-0.176303	0.0864375	-2.03966	0.0413843	0.590693
GRB10	2887	NC_000007	chr7	-	50590063	50793462	12860	831.941	0.185371	0.0909359	2.03847	0.0415025	0.590693
HIST2H2AB	317772	NC_000001	chr1	-	149887469	149887916	448	111.948	0.256772	0.125774	2.04153	0.041198	0.590693
IL17RB	55540	NC_000003	chr3	+	53846550	53865800	3137	349.765	0.270597	0.132638	2.04012	0.0413385	0.590693
KBTBD3	143879	NC_000011	chr11	-	106048808	106077765	10505	151.29	-0.202672	0.0993328	-2.04034	0.0413169	0.590693
LANCL1	10314	NC_000002	chr2	-	210431249	210477652	5254	2227.38	-0.202545	0.0994143	-2.03738	0.0416118	0.590693
LARP6	55323	NC_000015	chr15	-	70829130	70854265	5048	591.704	-0.228326	0.111789	-2.04247	0.0411051	0.590693
PCDHGA12	26025	NC_000005	chr5	+	141430589	141512979	4815	8849.28	0.221453	0.108696	2.03736	0.0416138	0.590693
PEG3	5178	NC_000019	chr19	-	56810077	56840726	9033	9536.44	-0.171552	0.0841022	-2.03981	0.0413695	0.590693
PGBD2	267002	NC_000001	chr1	+	248905519	248921254	6960	126.283	-0.216152	0.106024	-2.03871	0.041479	0.590693
RELL2	285613	NC_000005	chr5	+	141636789	141641077	3021	296.063	-0.287361	0.140831	-2.04047	0.0413037	0.590693
SMTNL1	219537	NC_000011	chr11	+	57537571	57550274	1721	31.4283	-0.295753	0.145066	-2.03875	0.0414747	0.590693
TRPV6	55503	NC_000007	chr7	-	142871203	142885762	12217	150.324	-0.294785	0.144658	-2.0378	0.0415703	0.590693
XPA	7507	NC_000009	chr9	-	97634451	97697409	4072	376.474	-0.219391	0.10741	-2.04255	0.0410966	0.590693
SLC25A36	55186	NC_000003	chr3	+	140941820	140979943	8765	248.542	-0.23115	0.113487	-2.03679	0.0416707	0.591008
TRAF1	7185	NC_000009	chr9	-	120902393	120929201	6477	47.352	-0.31082	0.152654	-2.03611	0.0417396	0.591491
NVL	4931	NC_000001	chr1	-	224227334	224330387	5098	228.831	-0.200494	0.0985339	-2.03477	0.041874	0.592466
TLK2ps1	0	NC_000017	chr17	-	34036681	34039872	3192	426.65	-0.191761	0.094244	-2.03473	0.0418782	0.592466
AEBP1	165	NC_000007	chr7	+	44104361	44114565	4882	4650.91	0.303924	0.14948	2.0332	0.0420323	0.592801
AIF1L	83543	NC_000009	chr9	+	131096476	131123152	5183	162.895	-0.251991	0.12389	-2.03399	0.0419525	0.592801
B3GNT2	10678	NC_000002	chr2	+	62196113	62224731	2861	102.252	0.237936	0.117092	2.03205	0.042149	0.592801
ENSG00000234981	0	NC_000001	chr1	+	206528915	206529706	792	21.1669	0.211685	0.104088	2.03372	0.0419802	0.592801
EXOC1	55763	NC_000004	chr4	+	55853616	55905078	5747	719.222	-0.129681	0.0638067	-2.0324	0.0421131	0.592801
KCNAB3	9196	NC_000017	chr17	-	7921859	7930622	4987	455.3	-0.246069	0.121113	-2.03173	0.0421809	0.592801
PPP5D1	100506012	NC_000019	chr19	-	46480788	46601200	5853	31.1738	-0.288591	0.142	-2.03232	0.0421209	0.592801
SYT2	127833	NC_000001	chr1	-	202590596	202710423	7785	105.716	-0.23612	0.11614	-2.03307	0.0420458	0.592801
NTSR2	23620	NC_000002	chr2	-	11658178	11670203	1608	204.937	0.282874	0.139254	2.03136	0.0422187	0.592842
DNAJB4	11080	NC_000001	chr1	+	77979163	78017964	3795	286.602	0.281581	0.138647	2.03092	0.0422631	0.592974
ATP2B4	493	NC_000001	chr1	+	203626561	203744081	9406	7038.42	0.233729	0.115107	2.03054	0.0423017	0.593026
KCNB1	3745	NC_000020	chr20	-	49363877	49483961	11870	1339.85	-0.200258	0.0986564	-2.02986	0.0423712	0.593052
SERPINE2	5270	NC_000002	chr2	-	223975048	224039319	8955	3157.54	0.244821	0.120611	2.02984	0.0423733	0.593052
ENSG00000234851	0	NC_000003	chr3	-	161429127	161429597	471	81.9259	0.256791	0.126555	2.02908	0.0424506	0.593156
MYH14	79784	NC_000019	chr19	+	50188186	50310545	9929	3202.27	-0.20561	0.101321	-2.02929	0.0424284	0.593156
SPRY1	10252	NC_000004	chr4	+	123396791	123403760	3987	273.343	0.245611	0.121091	2.02831	0.0425284	0.593756
TIMM9	26520	NC_000014	chr14	-	58408494	58427614	1500	33.2883	-0.307359	0.151636	-2.02696	0.0426666	0.595196
ARPP21	10777	NC_000003	chr3	+	35638945	35794496	15134	1650.19	-0.183183	0.0904408	-2.02545	0.0428214	0.595318
EDIL3	10085	NC_000005	chr5	-	83940554	84384867	5812	1185.17	-0.227987	0.112556	-2.02553	0.0428126	0.595318
HEYL	26508	NC_000001	chr1	-	39623431	39639945	4568	69.1489	0.308994	0.152497	2.02623	0.042741	0.595318
HPN	3249	NC_000019	chr19	+	35040506	35066577	6867	37.6232	-0.305613	0.150908	-2.02516	0.0428505	0.595318
MAGEL2	54551	NC_000015	chr15	-	23643544	23647846	4303	92.7867	-0.277638	0.137082	-2.02535	0.0428318	0.595318
P4HA1	5033	NC_000010	chr10	-	73007217	73096974	5628	400.903	0.277515	0.137073	2.02458	0.0429103	0.595662
NDUFS2	4720	NC_000001	chr1	+	161197104	161214395	4031	1882.93	-0.130469	0.0644719	-2.02366	0.0430055	0.596495
A2ML1	144568	NC_000012	chr12	+	8822472	8887001	7150	147.931	0.307704	0.152156	2.0223	0.0431453	0.596863
DHX58	79132	NC_000017	chr17	-	42101404	42112733	3843	65.5161	-0.299478	0.148185	-2.02097	0.0432833	0.596863
JMJD1C-AS1	84989	NC_000010	chr10	+	63465272	63465906	635	50.1	-0.298495	0.147579	-2.02261	0.0431136	0.596863
KCNJ16	3773	NC_000017	chr17	+	70053429	70135608	6406	292.389	0.309061	0.152799	2.02267	0.0431072	0.596863
MCF2L	23263	NC_000013	chr13	+	112894378	113099739	23395	4189.25	-0.214949	0.106317	-2.02178	0.0431987	0.596863
PTGES3	10728	NC_000012	chr12	-	56663341	56688408	4230	308.785	0.219805	0.108757	2.02108	0.0432719	0.596863
PVALB	5816	NC_000022	chr22	-	36800684	36819479	1050	208.373	-0.264948	0.131119	-2.02068	0.0433131	0.596863
RPGRIP1L	23322	NC_000016	chr16	-	53597683	53703889	10977	369.865	-0.225792	0.111691	-2.02158	0.04322	0.596863
SLC16A8	23539	NC_000022	chr22	-	38078134	38084093	2203	37.198	-0.299962	0.148566	-2.01905	0.0434821	0.598707
ENSG00000229091	0	NC_000007	chr7	+	10451311	10452526	1216	673.925	0.212272	0.105204	2.01772	0.0436206	0.599157
ITGAV	3685	NC_000002	chr2	+	186589645	186680902	8257	1816.38	0.209237	0.10369	2.01791	0.0436007	0.599157
MMD	23531	NC_000017	chr17	-	55392613	55421993	3365	571.868	0.298967	0.148151	2.01798	0.043593	0.599157
BCR	613	NC_000022	chr22	+	23179704	23318037	14630	4568.34	0.213262	0.105742	2.01682	0.0437148	0.599966
DCUN1D2	55208	NC_000013	chr13	-	113455819	113490952	4577	228.024	-0.245114	0.121613	-2.01552	0.0438506	0.600678
PIAS4	51588	NC_000019	chr19	+	4007646	4039386	3646	205.804	-0.239675	0.118924	-2.01536	0.0438672	0.600678
SLC2A10	81031	NC_000020	chr20	+	46709640	46736347	4392	272.533	0.231563	0.114902	2.01531	0.0438727	0.600678
TOR1AIP2	163590	NC_000001	chr1	-	179839967	179877806	18920	429.583	0.19878	0.0986894	2.0142	0.0439883	0.601776
ADH5B	0	NC_000006	chr6	-	65836930	65838039	1110	163.264	0.213695	0.106307	2.01018	0.0444124	0.602797
AHCYL2	23382	NC_000007	chr7	+	129225014	129430211	10864	1517.38	0.175838	0.0873713	2.01253	0.0441636	0.602797
CYTH1	9267	NC_000017	chr17	-	78674048	78782294	7364	386.791	-0.171697	0.0853321	-2.0121	0.0442096	0.602797
GPR21	2844	NC_000009	chr9	+	123033637	123039101	5037	29.2839	-0.303009	0.150671	-2.01106	0.0443193	0.602797
GSTM2	2946	NC_000001	chr1	+	109668022	109702442	4472	903.744	0.274195	0.136308	2.01159	0.0442632	0.602797
PHACTR2	9749	NC_000006	chr6	+	143536845	143844617	11500	786.13	0.213755	0.106351	2.0099	0.0444413	0.602797
SETD2	29072	NC_000003	chr3	-	47016408	47163977	10276	3983.72	-0.126669	0.0630229	-2.00989	0.0444424	0.602797
SYT9	143425	NC_000011	chr11	+	7238778	7469768	6662	317.743	0.255671	0.127213	2.00979	0.0444532	0.602797
SYTL5	94122	NC_000023	chrX	+	38006582	38128820	4883	257.378	0.268089	0.133222	2.01235	0.0441835	0.602797
TNNT1	7138	NC_000019	chr19	-	55132699	55149354	1938	216.032	0.269861	0.134142	2.01175	0.0442464	0.602797
TRMT44	152992	NC_000004	chr4	+	8436140	8512610	12651	381.266	-0.203927	0.101429	-2.01053	0.044375	0.602797
RHPN2	85415	NC_000019	chr19	-	32978592	33064918	4752	271.929	-0.294507	0.146563	-2.00942	0.0444924	0.602848
VWA7	80737	NC_000006	chr6	-	31765401	31777331	3993	289.524	-0.295614	0.147189	-2.0084	0.0446011	0.603839
CRTAC1	55118	NC_000010	chr10	-	97865000	98030828	3556	560.796	-0.21371	0.10644	-2.0078	0.0446646	0.603909
CYP46A1	10858	NC_000014	chr14	+	99684304	99727301	9143	1552.53	0.254569	0.126819	2.00734	0.044713	0.603909
MPP6	51678	NC_000007	chr7	+	24573268	24694193	9609	822.264	0.191809	0.0955535	2.00735	0.0447124	0.603909
GPR137C	283554	NC_000014	chr14	+	52553148	52637713	6193	164.886	-0.269284	0.134181	-2.00686	0.0447642	0.604121
LAYN	143903	NC_000011	chr11	+	111540508	111561745	3000	58.379	-0.302523	0.150869	-2.0052	0.0449416	0.606034
AHR	196	NC_000007	chr7	+	17298622	17346152	6278	303.282	-0.195856	0.0977161	-2.00434	0.0450338	0.606127
C17orf107	100130311	NC_000017	chr17	+	4899418	4902932	3515	516.363	-0.243936	0.121723	-2.00402	0.0450681	0.606127
FKRP	79147	NC_000019	chr19	+	46746046	46776988	5739	322.471	-0.229314	0.114515	-2.00247	0.0452339	0.606127
FRMD5	84978	NC_000015	chr15	-	43870761	44195294	6367	736.81	-0.230775	0.115223	-2.00286	0.0451927	0.606127
GOLGA2P10	80154	NC_000015	chr15	-	82471477	82513999	4599	25.707	-0.306528	0.153073	-2.00249	0.0452318	0.606127
LAPTM4A	9741	NC_000002	chr2	-	20032650	20052028	2476	3367.18	0.132454	0.0661431	2.00253	0.0452277	0.606127
RPN2	6185	NC_000020	chr20	+	37179046	37241623	3175	1911.53	0.210368	0.104993	2.00364	0.0451082	0.606127
SEPP1	6414	NC_000005	chr5	-	42799880	42887392	6355	316.888	-0.27519	0.137403	-2.0028	0.0451985	0.606127
CDKL2	8999	NC_000004	chr4	-	75576494	75630716	5292	370.577	-0.202041	0.100946	-2.00148	0.0453402	0.606595
TRPM4	54795	NC_000019	chr19	+	49157741	49211841	6531	278.72	-0.223394	0.111605	-2.00165	0.0453225	0.606595
KCTD8	386617	NC_000004	chr4	-	44173903	44448807	2710	60.4624	-0.26128	0.130602	-2.00058	0.0454372	0.606936
STX1B	112755	NC_000016	chr16	-	30989256	31010628	5180	2530.76	-0.230853	0.115381	-2.00079	0.0454148	0.606936
C17orf59	54785	NC_000017	chr17	-	8188333	8190907	2575	47.4808	0.270593	0.135326	1.99957	0.0455466	0.606967
ENSG00000225191	0	NC_000001	chr1	+	103926567	103927806	1240	124.12	0.261492	0.13074	2.00009	0.0454901	0.606967
OSTF1P	0	NC_000012	chr12	+	114588194	114588802	609	138.195	-0.267791	0.133918	-1.99967	0.0455364	0.606967
ENSG00000227581	0	NC_000023	chrX	-	90039213	90039834	622	107.276	-0.25902	0.129564	-1.99917	0.0455897	0.607065
LRRC55	219527	NC_000011	chr11	+	57181747	57191717	5410	41.8013	-0.305898	0.153069	-1.99843	0.0456696	0.607178
RPLP1	6176	NC_000015	chr15	+	69452784	69456194	3271	721.229	0.217939	0.109043	1.99865	0.0456465	0.607178
OST4	100128731	NC_000002	chr2	-	27070472	27071773	719	294.542	0.22411	0.112186	1.99767	0.0457528	0.607808
HTR7	3363	NC_000010	chr10	-	90740818	90857914	3352	39.0735	0.306276	0.153378	1.99688	0.0458386	0.608472
CEBPB	1051	NC_000020	chr20	+	50190583	50192690	2108	303.605	0.24785	0.124211	1.99539	0.0459999	0.60966
CRB1	23418	NC_000001	chr1	+	197201462	197478455	13104	1172.01	0.242556	0.121539	1.9957	0.0459663	0.60966
NUDT16L1	84309	NC_000016	chr16	+	4693530	4695859	2232	184.944	0.268821	0.134811	1.99406	0.0461459	0.610643
XPO7	23039	NC_000008	chr8	+	21919669	22006585	6742	2584.55	0.18775	0.0941436	1.9943	0.0461198	0.610643
ZNF706	51123	NC_000008	chr8	-	101177878	101206193	7407	438.822	0.20806	0.10438	1.99329	0.0462297	0.611275
FSD1	79187	NC_000019	chr19	+	4304594	4323846	3120	532.167	-0.218422	0.109632	-1.99232	0.0463361	0.611761
POU6F2	11281	NC_000007	chr7	+	38977998	39493095	7662	410.814	-0.304011	0.152616	-1.992	0.0463709	0.611761
SNN	8303	NC_000016	chr16	+	11668414	11679159	3312	505.669	0.225435	0.113172	1.99197	0.0463744	0.611761
CALB2	794	NC_000016	chr16	+	71358713	71390438	1703	224.618	0.30526	0.153349	1.99063	0.046522	0.612341
NCS1	23413	NC_000009	chr9	+	130172578	130237304	5128	3701.4	0.219151	0.110112	1.99026	0.0465626	0.612341
PCDHGB7	56099	NC_000005	chr5	+	141417645	141512981	4968	8791.23	0.213589	0.107302	1.99055	0.0465307	0.612341
PEAK1	79834	NC_000015	chr15	-	77100656	77420144	23799	1820.37	0.117222	0.0588703	1.9912	0.0464592	0.612341
CHGA	1113	NC_000014	chr14	+	92923080	92935293	3102	4049.3	-0.299088	0.150311	-1.98979	0.0466137	0.612355
HTR2B	3357	NC_000002	chr2	-	231108230	231125213	2341	83.6217	-0.277084	0.139266	-1.98959	0.0466357	0.612355
PCDHGA4	56111	NC_000005	chr5	+	141355025	141512979	4887	8728.55	0.214015	0.107644	1.98817	0.0467926	0.61361
PHF20	51230	NC_000020	chr20	+	35771974	35950381	10088	942.487	0.153607	0.0772643	1.98807	0.0468035	0.61361
GPR137B	7107	NC_000001	chr1	+	236142505	236251662	2689	455.653	0.216655	0.109001	1.98764	0.0468514	0.613764
C9orf72	203228	NC_000009	chr9	-	27546545	27573866	6105	288.571	-0.215092	0.108242	-1.98714	0.0469068	0.614002
HTR1B	3351	NC_000006	chr6	-	77461753	77463773	2021	69.8705	0.298652	0.150316	1.98682	0.0469418	0.614002
TTC39B	158219	NC_000009	chr9	-	15163622	15307360	11781	210.726	-0.249383	0.125545	-1.9864	0.0469888	0.614143
ENSG00000204993	0	NC_000002	chr2	+	52570648	52572522	1875	422.31	0.203671	0.102664	1.98386	0.047271	0.614488
FAM131B	9715	NC_000007	chr7	-	143353400	143382283	6796	1653.37	-0.189328	0.0953912	-1.98475	0.0471721	0.614488
FBXL7	23194	NC_000005	chr5	+	15500196	15939796	5052	235.608	0.213347	0.107557	1.98356	0.0473045	0.614488
FCGRT	2217	NC_000019	chr19	+	49506816	49526428	4268	273.665	0.217153	0.109444	1.98414	0.04724	0.614488
HCFC1R1	54985	NC_000016	chr16	-	3022620	3024286	1433	34.2245	-0.277657	0.13982	-1.98582	0.0470533	0.614488
PARP10	84875	NC_000008	chr8	-	143977152	144012772	6041	175.849	0.225839	0.113794	1.98463	0.0471852	0.614488
PDE4B	5142	NC_000001	chr1	+	65792510	66374579	10779	829.222	-0.241494	0.121715	-1.98409	0.0472455	0.614488
PRPS2	5634	NC_000023	chrX	+	12791355	12824227	2544	194.532	-0.261708	0.131915	-1.98391	0.0472654	0.614488
ANKS6	203286	NC_000009	chr9	-	98731329	98796539	9028	208.274	-0.250366	0.126497	-1.97922	0.0477908	0.617971
ENSG00000235370	0	NC_000015	chr15	-	84398316	84411701	8839	136.69	-0.280093	0.141467	-1.97992	0.0477123	0.617971
ITFG2	55846	NC_000012	chr12	+	2812621	2859791	6252	211.738	-0.217645	0.109877	-1.9808	0.0476137	0.617971
PCDHGA3	56112	NC_000005	chr5	+	141343829	141512979	4876	8760.94	0.213904	0.108037	1.97991	0.0477133	0.617971
PPAP2C	8612	NC_000019	chr19	-	281040	291504	6915	81.2179	-0.298532	0.150822	-1.97936	0.0477756	0.617971
TMEM88B	643965	NC_000001	chr1	+	1426128	1427787	492	24.9218	-0.253846	0.128232	-1.97959	0.04775	0.617971
GOLGA8B	440270	NC_000015	chr15	-	34525095	34588503	7133	35.1675	-0.269727	0.136312	-1.97875	0.0478447	0.618197
CFD	1675	NC_000019	chr19	+	859643	863630	1201	22.7042	0.299432	0.151421	1.97748	0.0479871	0.619096
PREPL	9581	NC_000002	chr2	-	44316281	44361862	8156	14333.2	-0.143888	0.0727616	-1.97753	0.0479814	0.619096
RSU1	6251	NC_000010	chr10	-	16590611	16817528	6353	295.885	0.211635	0.107108	1.97591	0.0481652	0.620922
CORO2B	10391	NC_000015	chr15	+	68559275	68727806	5572	1311.85	-0.178436	0.0903283	-1.97541	0.0482211	0.621171
ACAA2	10449	NC_000018	chr18	-	49782167	49813960	4618	229.894	0.231563	0.11753	1.97024	0.0488107	0.621322
AFF2	2334	NC_000023	chrX	+	148500619	149000663	14015	1295.22	0.205732	0.104431	1.97002	0.0488364	0.621322
AK058076	0	NC_000009	chr9	-	2716813	2718348	1536	51.7222	0.29651	0.150526	1.96983	0.0488578	0.621322
CHPT1	56994	NC_000012	chr12	+	101696947	101744140	8184	706.968	0.24931	0.126396	1.97245	0.0485582	0.621322
EPN3	55040	NC_000017	chr17	+	50532543	50543750	4386	72.8114	-0.297973	0.150918	-1.9744	0.0483359	0.621322
FBXO22	26263	NC_000015	chr15	+	75903859	75942510	11729	138.638	-0.203609	0.10336	-1.9699	0.0488498	0.621322
GLURR2	0	NC_000004	chr4	+	68038544	68039647	1104	25.7914	0.286858	0.145378	1.97319	0.0484742	0.621322
HLTF	6596	NC_000003	chr3	-	149030117	149086554	5930	498.382	-0.214684	0.108964	-1.97023	0.0488126	0.621322
INMT-FAM188B	100526825	NC_000007	chr7	+	30752137	30892081	2880	207.302	-0.217897	0.11042	-1.97336	0.0484548	0.621322
MTHFDL1	0	NC_000023	chrX	-	57392646	57395409	2764	518.366	0.198083	0.100573	1.96954	0.048891	0.621322
PCYT1A	5130	NC_000003	chr3	-	196234368	196287957	7307	335.659	-0.17916	0.0907944	-1.97324	0.0484678	0.621322
POLE	5426	NC_000012	chr12	-	132623753	132687524	16768	580.123	-0.27622	0.140182	-1.97044	0.0487877	0.621322
PWWP2A	114825	NC_000005	chr5	-	160061801	160119445	7054	527.124	-0.171083	0.0868323	-1.97026	0.0488081	0.621322
SAPCD1	401251	NC_000006	chr6	+	31762444	31764851	1764	22.9348	-0.300354	0.152442	-1.97029	0.0488057	0.621322
SERPINB9	5272	NC_000006	chr6	-	2887265	2903312	4299	190.506	-0.237171	0.120206	-1.97304	0.0484911	0.621322
TMEM44	93109	NC_000003	chr3	-	194587673	194633689	3921	161.513	0.247653	0.125525	1.97294	0.0485029	0.621322
TNNT2	7139	NC_000001	chr1	-	201359008	201377762	7259	492.544	-0.296965	0.15072	-1.9703	0.0488036	0.621322
TUBGCP3	10426	NC_000013	chr13	-	112485005	112588185	6095	425.773	-0.164404	0.0833932	-1.97144	0.0486741	0.621322
FGFR1	2260	NC_000008	chr8	-	38410219	38468834	16703	1643.54	0.256191	0.130141	1.96857	0.0490025	0.621325
KCNA2	3737	NC_000001	chr1	-	110593580	110631474	4012	781.742	-0.249289	0.126602	-1.96908	0.048944	0.621325
PCDHGA5	56110	NC_000005	chr5	+	141364232	141512979	5733	8682.76	0.212687	0.108027	1.96883	0.0489725	0.621325
PCDHGB6	56100	NC_000005	chr5	+	141408021	141512979	6782	8680.78	0.212303	0.107863	1.96827	0.0490375	0.621325
DDN	23109	NC_000012	chr12	-	48995149	48999309	3749	3773.59	0.274233	0.139442	1.96664	0.0492247	0.621383
FAM90A1	55138	NC_000012	chr12	-	8221260	8227618	3923	1592.62	-0.230254	0.117016	-1.96772	0.0491004	0.621383
GAL3ST4	79690	NC_000007	chr7	-	100159242	100168750	3369	54.1443	0.289213	0.147225	1.96442	0.049481	0.621383
GUSBP1	728411	NC_000005	chr5	+	21341833	21589372	6477	379.461	-0.261703	0.13307	-1.96665	0.0492233	0.621383
GXL_27377	0	NC_000005	chr5	+	141387698	141511527	9734	8329.53	0.211505	0.107595	1.96575	0.0493273	0.621383
HTT	3064	NC_000004	chr4	+	3074681	3243960	18033	9159.81	0.123147	0.0626656	1.96514	0.0493977	0.621383
IL6ST	3572	NC_000005	chr5	-	55935095	55994993	9302	2461.87	0.163897	0.0833848	1.96555	0.0493507	0.621383
LEPRE1	64175	NC_000001	chr1	-	42746335	42767084	6766	289.923	-0.233535	0.118793	-1.9659	0.0493097	0.621383
PCDHGA10	56106	NC_000005	chr5	+	141412987	141512979	6643	8793.59	0.214289	0.109009	1.96579	0.0493228	0.621383
PCDHGA11	56105	NC_000005	chr5	+	141420970	141512979	5891	8739.7	0.212755	0.108298	1.96454	0.049467	0.621383
PCDHGB5	56101	NC_000005	chr5	+	141397987	141512979	4851	8754.22	0.212871	0.108352	1.96462	0.049458	0.621383
PTCH1	5727	NC_000009	chr9	-	95442980	95517057	16627	1711.57	0.265366	0.135073	1.96462	0.0494584	0.621383
PCDHGB4	8641	NC_000005	chr5	+	141387885	141512979	4593	8653.11	0.212107	0.108064	1.96278	0.0496714	0.623314
WNT7B	7477	NC_000022	chr22	-	45920362	45977129	4129	61.0814	0.300753	0.153273	1.96221	0.049738	0.623689
AVPR2	554	NC_000023	chrX	+	153902531	153907166	2337	29.5189	0.296255	0.151193	1.95944	0.0500608	0.623923
C2orf16	84226	NC_000002	chr2	+	27576522	27582722	6201	255.051	-0.234969	0.119898	-1.95973	0.0500269	0.623923
CD86	942	NC_000003	chr3	+	122055362	122121143	3517	29.7555	0.286417	0.146259	1.95828	0.0501973	0.623923
CISD2	493856	NC_000004	chr4	+	102828134	102892807	6822	137.955	0.240779	0.122938	1.95854	0.0501669	0.623923
CTSH	1512	NC_000015	chr15	-	78921058	78949501	6069	271.01	0.261537	0.133517	1.95883	0.050133	0.623923
EML6	400954	NC_000002	chr2	+	54723499	54972025	15110	1364.22	-0.259328	0.132357	-1.95931	0.0500767	0.623923
ENTPD2	954	NC_000009	chr9	-	137048098	137054051	2639	94.009	0.294634	0.150331	1.9599	0.0500074	0.623923
GCNT2	2651	NC_000006	chr6	+	10492223	10629368	9797	57.7935	0.297568	0.151841	1.95973	0.0500269	0.623923
IGLON5	402665	NC_000019	chr19	+	51311848	51330848	3233	90.708	-0.260626	0.133035	-1.95907	0.0501044	0.623923
PCDHGB1	56104	NC_000005	chr5	+	141350102	141512979	4773	8724.07	0.211381	0.107894	1.95916	0.0500946	0.623923
PCDHGB2	56103	NC_000005	chr5	+	141360042	141512979	4769	8693.73	0.211517	0.107902	1.96027	0.0499642	0.623923
PHYH	5264	NC_000010	chr10	-	13277796	13300138	2991	534.832	-0.196178	0.100045	-1.9609	0.0498913	0.623923
RARB	5915	NC_000003	chr3	+	25174332	25597932	3460	177.065	-0.283792	0.144961	-1.95772	0.0502634	0.624288
PCDHGA8	9708	NC_000005	chr5	+	141391916	141512979	5669	8625.44	0.211434	0.108052	1.95677	0.050374	0.624748
SMARCA1	6594	NC_000023	chrX	-	129446501	129523513	6004	1393.93	0.134106	0.0685326	1.95683	0.0503679	0.624748
SPECC1	92521	NC_000017	chr17	+	20009301	20319026	13594	2685.92	-0.190759	0.0975497	-1.95551	0.0505231	0.625684
TRIM27	5987	NC_000006	chr6	-	28903002	28923991	7988	425.8	0.172171	0.088036	1.95569	0.0505019	0.625684
ABCA4	24	NC_000001	chr1	-	93992835	94121149	9448	41.9527	-0.293994	0.15104	-1.94647	0.0515989	0.626515
ATG14	22863	NC_000014	chr14	-	55366391	55411858	5053	126.618	-0.205512	0.105246	-1.95269	0.0508558	0.626515
BAK1	578	NC_000006	chr6	-	33572546	33580296	2718	50.9707	-0.283423	0.145093	-1.95339	0.0507735	0.626515
CANX	821	NC_000005	chr5	+	179678628	179731641	6956	7629.05	0.168087	0.0862297	1.94929	0.0512604	0.626515
CENPV	201161	NC_000017	chr17	-	16342534	16353656	2302	181.384	-0.193515	0.0990843	-1.95304	0.0508151	0.626515
DYSF	8291	NC_000002	chr2	+	71453294	71686768	12188	768.438	-0.2706	0.138976	-1.9471	0.0515222	0.626515
ENSG00000228348	0	NC_000001	chr1	+	35122022	35122484	463	88.9311	0.256654	0.131884	1.94605	0.0516482	0.626515
ENSG00000232346	0	NC_000022	chr22	+	32039490	32039896	407	999.609	0.17823	0.0914439	1.94907	0.0512875	0.626515
FBLIM1	54751	NC_000001	chr1	+	15756340	15786594	4894	24.3987	-0.289021	0.148504	-1.94621	0.0516296	0.626515
HIPK1	204851	NC_000001	chr1	+	113929192	113977869	9280	2406.76	0.150707	0.0773554	1.94824	0.051386	0.626515
HSP90AA1	3320	NC_000014	chr14	-	102080738	102139749	5298	22091.6	0.242168	0.124147	1.95066	0.0510977	0.626515
KCNV1	27012	NC_000008	chr8	-	109963645	109975847	6979	598.497	-0.229572	0.117908	-1.94705	0.0515292	0.626515
MAL	4118	NC_000002	chr2	+	95025655	95053996	3207	325.725	-0.291956	0.149644	-1.95101	0.0510562	0.626515
MRPL13	28998	NC_000008	chr8	-	120380761	120445407	4214	46.5333	-0.270655	0.138637	-1.95225	0.0509081	0.626515
NUTF2	10204	NC_000016	chr16	+	67846732	67872567	4213	86.9977	0.232473	0.119134	1.95136	0.0510139	0.626515
PCDHGA1	56114	NC_000005	chr5	+	141330571	141512981	6252	8675.04	0.209933	0.107526	1.95239	0.0508917	0.626515
PCDHGA2	56113	NC_000005	chr5	+	141338760	141512979	6724	8783.37	0.209434	0.107154	1.95451	0.0506415	0.626515
PCDHGA9	56107	NC_000005	chr5	+	141402932	141512979	4749	8750.24	0.210138	0.107742	1.95038	0.0511306	0.626515
PLCD1	5333	NC_000003	chr3	-	38007496	38029762	4133	716.976	0.247529	0.127047	1.94833	0.0513751	0.626515
PTPRA	5786	NC_000020	chr20	+	2864184	3039076	4974	4532.74	0.175741	0.090307	1.94604	0.0516494	0.626515
RUNX1	861	NC_000021	chr21	-	34787801	35049344	10909	114.274	0.294355	0.151073	1.94843	0.0513636	0.626515
SLC22A10	387775	NC_000011	chr11	+	63137867	63369718	3274	39.2981	-0.299436	0.153319	-1.95303	0.0508158	0.626515
TESPA1	9840	NC_000012	chr12	-	54948303	54985180	4752	3048.05	-0.270837	0.138953	-1.94913	0.0512797	0.626515
TMEM38A	79041	NC_000019	chr19	+	16661127	16690029	3005	225.301	-0.253191	0.129922	-1.94879	0.0513209	0.626515
TTC6	319089	NC_000014	chr14	+	37595847	38041442	8361	45.8389	0.299164	0.15334	1.95099	0.0510585	0.626515
YES1	7525	NC_000018	chr18	-	721588	812546	5022	340.595	0.214542	0.110267	1.94565	0.0516964	0.626515
ZEB2	9839	NC_000002	chr2	-	144384375	144524580	20265	6733.37	-0.138163	0.0709695	-1.9468	0.051559	0.626515
ZIM2	23619	NC_000019	chr19	-	56774547	56840729	2583	3639.89	-0.160546	0.0822114	-1.95284	0.0508388	0.626515
ZNF449	203523	NC_000023	chrX	+	135344771	135363413	5635	77.5073	-0.25697	0.131692	-1.95129	0.0510221	0.626515
ZSCAN9	7746	NC_000006	chr6	+	28224886	28233487	3397	63.1331	-0.28765	0.147835	-1.94575	0.0516847	0.626515
B3GNT8	374907	NC_000019	chr19	-	41425359	41428730	1874	22.6475	-0.297968	0.153183	-1.94518	0.0517533	0.626757
NCL	4691	NC_000002	chr2	-	231453531	231483641	6317	9709.1	-0.138091	0.0710363	-1.94395	0.0519012	0.627345
PCDHGA7	56108	NC_000005	chr5	+	141382739	141512979	5443	8668.57	0.21059	0.10832	1.94414	0.0518783	0.627345
VSTM4	196740	NC_000010	chr10	-	49014245	49115532	8863	105.072	0.228977	0.117795	1.94386	0.0519126	0.627345
PCDHGB3	56102	NC_000005	chr5	+	141370264	141512979	4757	8633.77	0.210367	0.108242	1.94349	0.0519568	0.627433
DOCK9	23348	NC_000013	chr13	-	98793487	99086625	14521	4904.96	0.159687	0.0821894	1.94291	0.0520265	0.627829
ENSG00000259619	0	NC_000015	chr15	-	54048588	54050876	2289	70.3131	-0.248274	0.12782	-1.94238	0.0520912	0.628163
KCTD11	147040	NC_000017	chr17	+	7351889	7354944	3056	26.426	0.286811	0.147783	1.94076	0.0522877	0.629193
LIPE	3991	NC_000019	chr19	-	42401507	42427426	5503	243.743	-0.261234	0.134589	-1.94097	0.0522616	0.629193
PSMG1	8624	NC_000021	chr21	-	39077145	39183851	3201	147.533	-0.232988	0.120022	-1.9412	0.0522338	0.629193
FTHL8	0	NC_000023	chrX	+	148052233	148052746	514	49.0401	-0.294411	0.151766	-1.93989	0.0523928	0.630011
TMEM158	25907	NC_000003	chr3	-	45224464	45226322	1859	34.1253	0.296981	0.153176	1.93882	0.0525232	0.631133
PMVK	10654	NC_000001	chr1	-	154924732	154937008	1299	454.233	0.223754	0.115445	1.93819	0.0525999	0.631161
PRUNE2	158471	NC_000009	chr9	-	76611376	76906220	18225	2816.11	-0.258127	0.133177	-1.93823	0.0525947	0.631161
ERGIC1	57222	NC_000005	chr5	+	172834220	172952685	15034	1576	0.154217	0.0795851	1.93776	0.0526523	0.631345
ELFN2	114794	NC_000022	chr22	-	37367960	37427470	8782	863.032	0.231619	0.119557	1.9373	0.0527086	0.631574
C7orf13	129790	NC_000007	chr7	-	156638375	156640570	2196	65.2541	0.29325	0.151402	1.9369	0.0527576	0.631576
CCP110	9738	NC_000016	chr16	+	19523811	19553408	10142	682.502	-0.199336	0.102938	-1.93647	0.0528104	0.631576
GXL_925267	0	NC_000019	chr19	-	12136906	12156729	1867	48.9924	-0.284821	0.147089	-1.93639	0.0528203	0.631576
AK124842	0	NC_000015	chr15	+	51448556	51451265	2710	1014.15	-0.151791	0.0785022	-1.93359	0.0531637	0.631726
CDKN1C	1028	NC_000011	chr11	-	2883213	2885881	2586	213.591	-0.29643	0.153212	-1.93477	0.0530189	0.631726
GOLM1	51280	NC_000009	chr9	-	86026141	86282538	6030	1567	0.199717	0.103266	1.934	0.0531128	0.631726
IGDCC3	9543	NC_000015	chr15	-	65327127	65378040	5359	54.2119	-0.288593	0.14923	-1.93387	0.0531286	0.631726
MANF	7873	NC_000003	chr3	+	51385047	51389397	2111	143.03	0.289849	0.149905	1.93356	0.0531675	0.631726
PACRG	135138	NC_000006	chr6	+	162727125	163315492	13203	65.0303	0.257338	0.133068	1.93389	0.0531267	0.631726
PLK5	126520	NC_000019	chr19	+	1524074	1535456	2353	32.4415	-0.296757	0.153425	-1.93422	0.0530863	0.631726
RGS17	26575	NC_000006	chr6	-	153004459	153131256	7906	52.9392	0.25921	0.133918	1.93559	0.0529177	0.631726
RSPH10B	222967	NC_000007	chr7	-	5925550	5970691	5003	38.9714	0.294207	0.15199	1.93571	0.0529035	0.631726
DFNB31	25861	NC_000009	chr9	-	114402080	114505509	5745	607.135	-0.286597	0.148324	-1.93224	0.0533298	0.632474
ENSG00000258650	0	NC_000014	chr14	+	58463971	58464136	166	22.7369	0.295931	0.153116	1.93273	0.0532695	0.632474
MKX	283078	NC_000010	chr10	-	27672874	27746060	4272	35.6398	-0.279994	0.144914	-1.93214	0.053342	0.632474
OCRL	4952	NC_000023	chrX	+	129539849	129592561	6006	1914.77	0.156593	0.0811117	1.93059	0.0535341	0.633425
RCC1	1104	NC_000001	chr1	+	28505943	28539300	3707	62.7443	0.280939	0.145479	1.93113	0.0534668	0.633425
THBD	7056	NC_000020	chr20	-	23045633	23049741	4109	174.241	0.293895	0.152221	1.93071	0.0535188	0.633425
AKAP6	9472	NC_000014	chr14	+	32329273	32837681	16827	5145.51	-0.137431	0.0712208	-1.92965	0.0536504	0.633918
LPGAT1	9926	NC_000001	chr1	-	211743457	211875189	8921	370.79	-0.204615	0.106022	-1.92993	0.053615	0.633918
FAM168A	23201	NC_000011	chr11	-	73400478	73598189	7832	322.276	-0.157807	0.0818118	-1.9289	0.0537431	0.633983
KSR2	283455	NC_000012	chr12	-	117453012	117968983	18299	1113.86	0.153767	0.0797034	1.92924	0.0537013	0.633983
LOC728728	728728	NC_000001	chr1	+	227967390	227968707	1225	71.0021	0.293901	0.152408	1.92838	0.0538082	0.633983
NECAB3	63941	NC_000020	chr20	-	33657087	33674463	4110	296.06	-0.238518	0.123706	-1.9281	0.0538424	0.633983
RPLP0	6175	NC_000012	chr12	-	120196686	120201235	3655	522.826	0.201954	0.104714	1.92862	0.0537784	0.633983
MEIS1	4211	NC_000002	chr2	+	66433452	66573869	7545	137.786	-0.258866	0.134305	-1.92746	0.0539228	0.634489
ITM2B	9445	NC_000013	chr13	+	48233138	48270357	10230	3917.28	0.128903	0.0669069	1.9266	0.0540295	0.635305
AATK	9625	NC_000017	chr17	-	81117295	81166077	6111	1533.62	-0.241565	0.12681	-1.90494	0.0567878	0.635328
ACOT13	55856	NC_000006	chr6	+	24667035	24705069	4398	120.706	0.21504	0.111997	1.92006	0.0548508	0.635328
AIM1	202	NC_000006	chr6	+	106360808	106570460	8856	39.0659	0.292714	0.152453	1.92003	0.0548545	0.635328
ARIH2P	0	NC_000018	chr18	+	28651732	28653208	1477	172.461	-0.206375	0.107563	-1.91865	0.0550288	0.635328
ASXL2	55252	NC_000002	chr2	-	25733753	25878516	13282	1213.94	0.151704	0.0788739	1.92338	0.0544324	0.635328
ATXN7L2	127002	NC_000001	chr1	+	109483479	109492804	5232	230.247	-0.239268	0.125082	-1.91289	0.0557626	0.635328
C5AR2	27202	NC_000019	chr19	+	47332147	47347327	7037	30.9142	-0.291797	0.152927	-1.90808	0.0563806	0.635328
C7orf60	154743	NC_000007	chr7	-	112819147	112939916	4138	83.0677	0.254212	0.132958	1.91198	0.0558793	0.635328
C8orf82	414919	NC_000008	chr8	-	144525733	144529132	2712	23.7975	-0.290592	0.150888	-1.92588	0.05412	0.635328
CALCRL	10203	NC_000002	chr2	-	187341963	187448460	7310	134.161	-0.239062	0.124746	-1.91639	0.0553159	0.635328
CFAP74	85452	NC_000001	chr1	-	1921951	2003837	12548	149.967	-0.241788	0.126042	-1.91832	0.05507	0.635328
CHD6	84181	NC_000020	chr20	-	41402101	41618494	14126	4318.57	-0.144961	0.0760066	-1.90721	0.0564928	0.635328
CHDC2	286464	NC_000023	chrX	+	36035791	36145070	2298	22.9531	0.287928	0.151155	1.90486	0.0567985	0.635328
CHRNA7	1139	NC_000015	chr15	+	32030483	32172521	5772	53.4708	0.291151	0.151968	1.91586	0.0553823	0.635328
CRTC1	23373	NC_000019	chr19	+	18683615	18782333	7027	2791.89	0.183349	0.0953613	1.92267	0.0545213	0.635328
DES	1674	NC_000002	chr2	+	219418377	219426739	2464	38.1076	-0.279485	0.14646	-1.90826	0.0563574	0.635328
DIP2B	57609	NC_000012	chr12	+	50504985	50748667	12321	3067.9	-0.170029	0.0890815	-1.9087	0.0563014	0.635328
dJ581P3.1	0	NC_000020	chr20	-	3489529	3491005	1477	136.336	-0.205511	0.106841	-1.92352	0.054415	0.635328
DPH1	1801	NC_000017	chr17	+	2030110	2043431	5612	1000.06	-0.157727	0.0827963	-1.905	0.0567807	0.635328
EDARADD	128178	NC_000001	chr1	+	236348262	236484914	3897	5618.21	0.211186	0.110082	1.91844	0.0550551	0.635328
ENSG00000219806	0	NC_000006	chr6	-	139614438	139615204	767	37.9798	-0.28345	0.147815	-1.91761	0.0551609	0.635328
ENSG00000224411	0	NC_000011	chr11	-	27888838	27891033	2196	1410.22	0.249966	0.129998	1.92284	0.0544999	0.635328
ENSG00000226814	0	NC_000001	chr1	+	192800571	192801141	571	31.7096	0.282337	0.146853	1.92258	0.0545329	0.635328
ENSG00000256356	0	NC_000012	chr12	+	4097451	4099519	2069	278.767	0.257069	0.133947	1.91918	0.0549621	0.635328
FAM134B	54463	NC_000005	chr5	-	16472813	16617058	4809	1059.9	-0.215826	0.11295	-1.91081	0.0560292	0.635328
FAM71C	196472	NC_000012	chr12	+	99647750	99650114	1867	25.9409	-0.293172	0.153366	-1.91158	0.0559296	0.635328
FCGR1B	2210	NC_000001	chr1	+	121087345	121097161	4234	93.6638	0.291581	0.152451	1.91262	0.0557961	0.635328
FCHSD1	89848	NC_000005	chr5	-	141639302	141651419	5811	435.538	-0.246722	0.128938	-1.91349	0.0556849	0.635328
FXYD6-FXYD2	100533181	NC_000011	chr11	-	117820075	117877031	1234	107.399	0.258519	0.134377	1.92383	0.0543759	0.635328
GCFC2	6936	NC_000002	chr2	-	75652000	75711356	5871	157.86	-0.20331	0.106497	-1.90907	0.0562536	0.635328
HACE1	57531	NC_000006	chr6	-	104728093	104859919	9240	992.364	-0.178749	0.093366	-1.9145	0.0555559	0.635328
HIST2H2BF	440689	NC_000001	chr1	-	149756263	149812410	5555	305.544	0.184754	0.0969475	1.90572	0.056687	0.635328
HK2	3099	NC_000002	chr2	+	74832655	74893359	7453	150.695	0.267976	0.140494	1.90739	0.0564698	0.635328
HSPB1	3315	NC_000007	chr7	+	76302544	76304297	1636	11355.6	0.279314	0.145777	1.91604	0.0553596	0.635328
IL16	3603	NC_000015	chr15	+	81159575	81314058	11792	92.15	0.272367	0.142202	1.91535	0.0554482	0.635328
ITGB5	3693	NC_000003	chr3	-	124761948	124887827	9652	502.3	0.224806	0.116944	1.92234	0.0545635	0.635328
LETM1	3954	NC_000004	chr4	-	1811479	1856247	8184	1905.01	0.167197	0.0875289	1.9102	0.0561081	0.635328
LINC00893	100131434	NC_000023	chrX	-	149498187	149540959	4028	1163.51	0.237581	0.123495	1.92381	0.0543784	0.635328
LRP10	26020	NC_000014	chr14	+	22871613	22881580	7136	460.072	0.221961	0.116404	1.90682	0.0565445	0.635328
LYPD1	116372	NC_000002	chr2	-	132644764	132671579	3204	86.8355	0.294183	0.153083	1.92172	0.054641	0.635328
MCAM	4162	NC_000011	chr11	-	119308524	119321521	7465	502.164	-0.288976	0.150878	-1.91529	0.055455	0.635328
METTL17	64745	NC_000014	chr14	+	20989770	20997035	4449	163.169	-0.24245	0.126997	-1.9091	0.056249	0.635328
MIPOL1	145282	NC_000014	chr14	+	37197913	37552361	18143	123.6	0.226032	0.118647	1.90508	0.0567693	0.635328
MRI1	84245	NC_000019	chr19	+	13764514	13774282	3474	163.897	-0.253953	0.132563	-1.91571	0.0554024	0.635328
MSL3P1	151507	NC_000002	chr2	-	233865437	233868444	2278	63.3199	0.250721	0.13136	1.90865	0.0563068	0.635328
MSTO1	55154	NC_000001	chr1	+	155610170	155614967	4040	280.724	-0.218562	0.114005	-1.91713	0.0552215	0.635328
MTCL1	23255	NC_000018	chr18	+	8705661	8832778	12792	1056.79	-0.231107	0.12064	-1.91568	0.0554063	0.635328
NAB1	4664	NC_000002	chr2	+	190646746	190692766	4881	758.917	-0.185391	0.0972878	-1.90559	0.0567028	0.635328
NAP1L2	4674	NC_000023	chrX	-	73212299	73214874	2576	2007.31	-0.169019	0.0878483	-1.92398	0.0543565	0.635328
NPEPPS	9520	NC_000017	chr17	+	47522942	47623276	11471	2521.5	0.141266	0.0740072	1.90882	0.0562857	0.635328
NT5DC3	51559	NC_000012	chr12	-	103770453	103841197	9857	1241.73	0.196232	0.102239	1.91935	0.05494	0.635328
PCDHGA6	56109	NC_000005	chr5	+	141373914	141512979	7910	8732.9	0.205877	0.107978	1.90665	0.0565658	0.635328
PIK3CG	5294	NC_000007	chr7	+	106865278	106908978	10646	142.232	0.24009	0.125911	1.90683	0.0565432	0.635328
PKP2	5318	NC_000012	chr12	-	32790745	32896846	5579	113.625	0.274436	0.142598	1.92454	0.0542863	0.635328
POR	5447	NC_000007	chr7	+	75899200	75986855	5886	543.181	0.163379	0.0852787	1.91582	0.0553879	0.635328
PPIL6	285755	NC_000006	chr6	-	109390215	109441171	4481	54.3155	0.269801	0.140448	1.92101	0.0547306	0.635328
PRKAA1	5562	NC_000005	chr5	-	40759379	40798374	7877	351.926	-0.229673	0.120081	-1.91265	0.0557924	0.635328
RCOR3	55758	NC_000001	chr1	+	211258377	211316385	10991	989.197	-0.18392	0.096045	-1.91493	0.0555009	0.635328
SFMBT2	57713	NC_000010	chr10	-	7158610	7411486	9967	448.335	0.195101	0.102069	1.91146	0.0559459	0.635328
SGCE	8910	NC_000007	chr7	-	94585224	94656209	3051	285.945	0.207015	0.107533	1.92513	0.0542137	0.635328
SHB	6461	NC_000009	chr9	-	37588413	38069213	10789	217.371	-0.223705	0.1169	-1.91364	0.0556658	0.635328
SLC25A53	401612	NC_000023	chrX	-	104099214	104157027	6912	34.5749	0.291867	0.152792	1.91022	0.0561049	0.635328
SLC6A20	54716	NC_000003	chr3	-	45755449	45796547	6317	38.9895	-0.293542	0.152398	-1.92616	0.0540848	0.635328
SPIRE2	84501	NC_000016	chr16	+	89817566	89871319	8609	472.297	-0.165209	0.086311	-1.91411	0.0556059	0.635328
SPON2	10417	NC_000004	chr4	-	1166932	1208962	6508	81.9033	-0.293026	0.153363	-1.91066	0.056048	0.635328
STAG3L5P-PVRIG2P-PILRB	101752399	NC_000007	chr7	+	100336079	100367831	7562	1228.24	-0.262756	0.137568	-1.91001	0.0561324	0.635328
SVEP1	79987	NC_000009	chr9	-	110365248	110579880	14290	257.262	-0.234281	0.122806	-1.90774	0.0564248	0.635328
TRIM39	56658	NC_000006	chr6	+	30326479	30343729	4172	142.437	-0.20774	0.10854	-1.91395	0.0556263	0.635328
UBLCP1	134510	NC_000005	chr5	+	159263081	159286040	2678	259.654	-0.200062	0.104389	-1.9165	0.055301	0.635328
USP33	23032	NC_000001	chr1	-	77695987	77759879	7088	913.484	-0.12654	0.065968	-1.91821	0.0550847	0.635328
WNT10B	7480	NC_000012	chr12	-	48965340	48971870	2677	170.006	0.220259	0.114589	1.92216	0.054586	0.635328
WRNIP1	56897	NC_000006	chr6	+	2765341	2786952	4013	1126.84	0.149303	0.0778245	1.91845	0.0550537	0.635328
WTIP	126374	NC_000019	chr19	+	34481638	34512304	13758	149.075	0.278397	0.145697	1.9108	0.0560302	0.635328
YPEL3	83719	NC_000016	chr16	-	30092314	30096915	3181	446.762	-0.181882	0.0954546	-1.90543	0.0567248	0.635328
AK096093	0	NC_000002	chr2	-	95045887	95048264	2378	93.0692	-0.291885	0.153345	-1.90346	0.0569807	0.636573
FAM160A1	729830	NC_000004	chr4	+	151409216	151670503	11803	45.3502	-0.2693	0.141493	-1.90327	0.0570051	0.636573
PLAG1	5324	NC_000008	chr8	-	56160904	56211324	7900	40.2379	-0.280737	0.147512	-1.90314	0.0570222	0.636573
ANKMY1	51281	NC_000002	chr2	-	240479422	240569209	11476	268.299	-0.226259	0.118913	-1.90273	0.0570759	0.636754
FBXL14	144699	NC_000012	chr12	-	1565993	1594165	2111	266.083	0.206463	0.108573	1.9016	0.0572229	0.637557
TMEM200A	114801	NC_000006	chr6	+	130365734	130443424	6498	42.2187	0.287711	0.151285	1.90178	0.0572004	0.637557
SLC22A3	6581	NC_000006	chr6	+	160348268	160454981	8547	75.3489	-0.24989	0.131433	-1.90127	0.057266	0.637619
AHSA1	10598	NC_000014	chr14	+	77458030	77469474	2258	2256.47	0.24501	0.129045	1.89864	0.0576113	0.638657
DSP	1832	NC_000006	chr6	+	7541575	7586717	10093	209.578	-0.290991	0.153181	-1.89965	0.0574793	0.638657
ENSG00000256238	0	NC_000012	chr12	-	16399274	16402406	3133	482.719	-0.158585	0.0834951	-1.89933	0.0575207	0.638657
GABRD	2563	NC_000001	chr1	+	2019324	2030753	1930	3501.18	-0.26565	0.140006	-1.89742	0.0577727	0.638657
GPNMB	10457	NC_000007	chr7	+	23235967	23275110	5182	315.254	0.288376	0.151955	1.89776	0.0577272	0.638657
JMJD6	23210	NC_000017	chr17	-	76712832	76726799	5973	268.597	0.253933	0.13367	1.89971	0.0574716	0.638657
KLHDC8B	200942	NC_000003	chr3	+	49171566	49176486	2642	181.594	0.252531	0.133089	1.89746	0.0577671	0.638657
REXO2	25996	NC_000011	chr11	+	114439386	114450279	3051	78.0451	0.248017	0.130615	1.89884	0.0575851	0.638657
RFTN2	130132	NC_000002	chr2	-	197568224	197676050	6705	788.239	0.241255	0.126986	1.89985	0.0574525	0.638657
SLC39A6	25800	NC_000018	chr18	-	36108531	36129814	5418	1153.05	0.155917	0.0821667	1.89757	0.0577525	0.638657
VWA5B2	90113	NC_000003	chr3	+	184229682	184242329	5811	604.219	-0.217438	0.114565	-1.89795	0.0577027	0.638657
PILRB	29990	NC_000007	chr7	+	100358003	100367831	1438	1005.57	-0.259057	0.136564	-1.89696	0.0578333	0.638911
AK001176	0	NC_000010	chr10	+	70434829	70436551	1723	27.16	-0.28905	0.152533	-1.895	0.0580918	0.638952
ALDH6A1	4329	NC_000014	chr14	-	74056850	74084493	6403	2895.25	0.185843	0.0980586	1.89523	0.0580624	0.638952
DLGAP4	22839	NC_000020	chr20	+	36306336	36528637	8959	3086.88	0.151578	0.0799874	1.89502	0.0580897	0.638952
DPP8	54878	NC_000015	chr15	-	65442463	65517704	9884	761.446	-0.160446	0.0846004	-1.89651	0.0578924	0.638952
FAM110B	90362	NC_000008	chr8	+	57994509	58204279	5874	191.816	0.212964	0.112372	1.89517	0.05807	0.638952
MARCKS	4082	NC_000006	chr6	+	113857347	113863475	4294	1390.73	0.197262	0.104099	1.89494	0.0581002	0.638952
NBAS	51594	NC_000002	chr2	-	15166908	15561348	12047	2006.04	0.13367	0.0705042	1.89591	0.0579719	0.638952
EOGT	285203	NC_000003	chr3	-	68975212	69013961	5700	76.409	-0.2679	0.141484	-1.8935	0.0582908	0.639805
HDGFRP3	50810	NC_000015	chr15	-	83115406	83208018	13511	483	-0.158253	0.0835671	-1.89373	0.0582609	0.639805
SDHAP1	255812	NC_000003	chr3	-	195959748	195990318	3354	128.578	-0.283065	0.149455	-1.89398	0.0582271	0.639805
AQP3	360	NC_000009	chr9	-	33441154	33447633	2950	42.8658	0.273254	0.144395	1.8924	0.0584371	0.640565
BHLHE40	8553	NC_000003	chr3	+	4979116	4985323	4871	1794.86	-0.253633	0.134021	-1.89248	0.0584267	0.640565
CAP1	10487	NC_000001	chr1	+	40040233	40072649	3817	1749.46	0.17961	0.0949315	1.892	0.0584914	0.640565
IGSF22	283284	NC_000011	chr11	-	18704305	18726230	4841	74.3383	-0.269188	0.142311	-1.89155	0.0585507	0.640565
KANSL1L	151050	NC_000002	chr2	-	210020711	210171383	11481	435.275	0.188933	0.0999265	1.89072	0.0586616	0.640565
PTH2R	5746	NC_000002	chr2	+	208359845	208854503	4260	33.1629	-0.275672	0.145762	-1.89125	0.0585905	0.640565
USP16	10600	NC_000021	chr21	+	29024617	29054488	5706	418.757	-0.158841	0.0840091	-1.89076	0.058657	0.640565
ZNF783	100289678	NC_000007	chr7	+	149262171	149297312	10990	594.966	-0.216898	0.114663	-1.89162	0.0585415	0.640565
MAF	4094	NC_000016	chr16	-	79585843	79600725	6987	3417.67	0.21196	0.112141	1.89012	0.0587414	0.641025
ICAM5	7087	NC_000019	chr19	+	10289979	10296778	3813	1516.51	0.241804	0.127981	1.88938	0.0588407	0.641193
SOCS6	9306	NC_000018	chr18	+	70288901	70330200	6113	283.061	0.160546	0.084967	1.88951	0.0588234	0.641193
YWHAZ	7534	NC_000008	chr8	-	100916525	100953489	8552	1176.66	0.194764	0.103095	1.88916	0.05887	0.641193
ABCA8	10351	NC_000017	chr17	-	68867287	68955404	11429	323.89	-0.280441	0.148537	-1.88802	0.0590226	0.642031
PTPRZ1	5803	NC_000007	chr7	+	121873089	122062036	9917	4386.75	0.241314	0.127797	1.88826	0.0589908	0.642031
GRP94c	0	NC_000001	chr1	+	91642516	91644082	1567	714.134	0.258335	0.136982	1.8859	0.0593086	0.644729
CORO6	84940	NC_000017	chr17	-	29614756	29622908	4322	439.834	-0.265387	0.140753	-1.88547	0.0593658	0.644939
MINA	84864	NC_000003	chr3	-	97941817	97972457	6041	332.823	0.181673	0.0963917	1.88474	0.0594647	0.6456
ACTR3B	57180	NC_000007	chr7	+	152759749	152887714	6777	497.268	0.218123	0.115879	1.88234	0.0597896	0.646236
CLEC18B	497190	NC_000016	chr16	-	74408270	74421953	3225	69.918	0.287328	0.152648	1.88229	0.059796	0.646236
DDHD1	80821	NC_000014	chr14	-	53036740	53153328	17309	830.62	-0.210484	0.111854	-1.88178	0.0598656	0.646236
DNM1P46	196968	NC_000015	chr15	-	99790156	99806927	3979	30.7298	-0.287612	0.15269	-1.88364	0.0596134	0.646236
KIF24	347240	NC_000009	chr9	-	34211976	34329237	7328	44.9275	-0.254925	0.135378	-1.88306	0.0596924	0.646236
MAOB	4129	NC_000023	chrX	-	43766610	43882475	3833	992.926	0.226172	0.120186	1.88185	0.0598559	0.646236
MT1H	4496	NC_000016	chr16	+	56669814	56671129	397	36.3043	0.183216	0.097319	1.88264	0.0597495	0.646236
NICN1	84276	NC_000003	chr3	-	49422333	49429326	3542	277.582	-0.167557	0.0890247	-1.88214	0.0598175	0.646236
TNFAIP8L3	388121	NC_000015	chr15	-	51056598	51105276	2354	110.966	0.271448	0.144135	1.88329	0.0596612	0.646236
ZNF625-ZNF20	100529855	NC_000019	chr19	-	12132117	12156731	5060	87.2498	-0.249441	0.132589	-1.88132	0.0599288	0.646508
LOC100996723	100996723	NC_000001	chr1	+	120197085	120327681	1335	56.7046	-0.217116	0.115458	-1.88047	0.060044	0.647339
ZNF502	91392	NC_000003	chr3	+	44712643	44723831	4834	86.4493	-0.231785	0.12328	-1.88015	0.0600872	0.647394
TMEM241	85019	NC_000018	chr18	-	23197144	23437969	5298	112.593	-0.212104	0.112857	-1.87941	0.060189	0.648081
THAP1	55145	NC_000008	chr8	-	42836671	42843331	2472	115.638	0.209067	0.111265	1.879	0.0602443	0.648266
LRGUK	136332	NC_000007	chr7	+	134127299	134264591	3253	58.4877	0.263387	0.140297	1.87736	0.0604694	0.650276
ANKRD39	51239	NC_000002	chr2	-	96847985	96858095	976	233.04	-0.245101	0.130609	-1.87659	0.060574	0.6506
NMT2	9397	NC_000010	chr10	-	15102584	15168704	7900	384.264	-0.181259	0.0965903	-1.87658	0.0605761	0.6506
RTEL1	51750	NC_000020	chr20	+	63657810	63698698	10147	837.731	-0.25907	0.138129	-1.87556	0.0607159	0.650883
SLC22A23	63027	NC_000006	chr6	-	3268962	3457022	11235	516.237	-0.20852	0.11119	-1.87535	0.060744	0.650883
TMEM234	56063	NC_000001	chr1	-	32213354	32222371	4625	162.043	-0.215795	0.115026	-1.87606	0.060647	0.650883
TSPAN14	81619	NC_000010	chr10	+	80454166	80533123	18000	859.21	0.172983	0.0922582	1.87499	0.060794	0.650883
TUB	7275	NC_000011	chr11	+	8019195	8106112	6771	1347.49	0.155294	0.0828182	1.87513	0.0607755	0.650883
FOSB	2354	NC_000019	chr19	+	45467995	45475179	5531	253.494	-0.230864	0.123157	-1.87454	0.0608559	0.650931
MC4R	4160	NC_000018	chr18	-	60371110	60372775	1666	87.5621	0.283227	0.151146	1.87387	0.0609486	0.650931
MDH1	4190	NC_000002	chr2	+	63588609	63607197	4365	5773.74	-0.153045	0.0817348	-1.87246	0.0611433	0.650931
PCNT	5116	NC_000021	chr21	+	46324070	46445769	11928	6107.07	-0.244285	0.130377	-1.87368	0.0609748	0.650931
RELN	5649	NC_000007	chr7	-	103471784	103989548	13608	3597.36	0.259082	0.138344	1.87274	0.0611038	0.650931
SDK1	221935	NC_000007	chr7	+	3301448	4269000	11813	489.779	0.199406	0.10649	1.87253	0.0611326	0.650931
STARD3NL	83930	NC_000007	chr7	+	38178206	38230671	4463	378.379	0.187965	0.100331	1.87345	0.0610064	0.650931
TBC1D2B	23102	NC_000015	chr15	-	77994985	78077724	9325	256.878	0.166622	0.0889481	1.87325	0.0610344	0.650931
ZNF251	90987	NC_000008	chr8	-	144720907	144761458	7766	184.39	-0.200905	0.107191	-1.87427	0.0608932	0.650931
GRID2IP	392862	NC_000007	chr7	-	6496778	6551436	4632	39.2708	-0.279521	0.149353	-1.87155	0.0612695	0.651866
BTBD2	55643	NC_000019	chr19	-	1985438	2015724	6294	2234.64	0.1947	0.104283	1.86704	0.0618958	0.655247
DEAR	102191832	NC_000004	chr4	+	152337655	152338096	370	161.639	-0.184865	0.0989518	-1.86824	0.061729	0.655247
DNAH2	146754	NC_000017	chr17	+	7717313	7833744	17272	237.22	0.237146	0.126933	1.86827	0.0617241	0.655247
HDAC4	9759	NC_000002	chr2	-	239048168	239401654	16159	1617.48	0.162216	0.0868691	1.86736	0.0618516	0.655247
KCTD21	283219	NC_000011	chr11	-	78171243	78188913	4878	279.768	0.197929	0.105999	1.86727	0.0618641	0.655247
PPM1L	151742	NC_000003	chr3	+	160755590	161078907	12459	613.332	-0.145314	0.0778034	-1.86771	0.0618024	0.655247
RN7SL1	6029	NC_000014	chr14	+	49586580	49586878	299	330.389	0.261344	0.139861	1.86859	0.0616793	0.655247
TMEM145	284339	NC_000019	chr19	+	42313325	42325062	2151	1126.96	-0.212072	0.113532	-1.86795	0.0617686	0.655247
ENSG00000232389	0	NC_000006	chr6	-	70608234	70609334	1101	267.532	0.207198	0.110996	1.86672	0.0619412	0.655319
AK026340	0	NC_000015	chr15	-	72473836	72475168	1333	312.581	-0.204185	0.10949	-1.86488	0.062198	0.657627
CNTNAP5	129684	NC_000002	chr2	+	124025287	124921201	11249	1964.88	-0.192653	0.103374	-1.86365	0.0623705	0.658418
DIRAS1	148252	NC_000019	chr19	-	2714567	2721418	3485	631.751	-0.218031	0.117019	-1.86321	0.0624323	0.658418
ENSG00000180574	0	NC_000012	chr12	+	10505890	10507491	1602	982.492	-0.187967	0.100891	-1.86307	0.0624522	0.658418
SLC35F2	54733	NC_000011	chr11	-	107790991	107928293	3717	31.0569	0.279754	0.150166	1.86297	0.0624666	0.658418
ZMYND15	84225	NC_000017	chr17	+	4740015	4746119	3303	29.0384	0.284886	0.152891	1.86332	0.0624169	0.658418
DVL1	1855	NC_000001	chr1	-	1335276	1349380	3646	2100.33	0.17913	0.0961736	1.86257	0.062523	0.658604
RPL9	6133	NC_000004	chr4	-	39454124	39458948	3259	151.648	-0.22661	0.121685	-1.86226	0.0625664	0.658653
ENSG00000223908	0	NC_000005	chr5	-	160023740	160024045	306	21.2802	0.283126	0.152056	1.86198	0.0626061	0.658663
BTN3A2	11118	NC_000006	chr6	+	26365159	26378320	7042	138.817	0.273617	0.147082	1.86031	0.062842	0.65956
CDC42EP1	11135	NC_000022	chr22	+	37559778	37569405	2662	56.5839	-0.279696	0.150295	-1.86099	0.062746	0.65956
COL10A1	1300	NC_000006	chr6	-	116118909	116158989	4891	425.843	-0.21778	0.117092	-1.8599	0.0628996	0.65956
EFHD2	79180	NC_000001	chr1	+	15409895	15430343	2531	851.593	-0.255223	0.137318	-1.85863	0.0630796	0.65956
ENSG00000261549	0	NC_000015	chr15	-	88989519	88990245	727	349.958	-0.174006	0.0935895	-1.85925	0.0629914	0.65956
MRPS29P2	0	NC_000002	chr2	+	171491422	171491931	510	109.608	-0.205764	0.110683	-1.85904	0.063022	0.65956
NDNF	79625	NC_000004	chr4	-	121035613	121073021	3556	64.5272	0.224011	0.120525	1.85863	0.0630792	0.65956
PPIB	5479	NC_000015	chr15	-	64155812	64163205	1911	1990.97	0.159661	0.0858623	1.85951	0.0629554	0.65956
PRKAB1	5564	NC_000012	chr12	+	119667753	119681630	5686	110.571	-0.20212	0.108732	-1.85888	0.0630445	0.65956
TAF1C	9013	NC_000016	chr16	-	84177847	84187070	5577	585.657	-0.214501	0.115317	-1.8601	0.062871	0.65956
TIMM10B/DNHD1	0	NC_000011	chr11	+	6481485	6508978	589	116.165	-0.243813	0.131205	-1.85826	0.063132	0.659702
ASF1A	25842	NC_000006	chr6	+	118894077	118909171	2664	183.753	0.218354	0.117615	1.85652	0.0633799	0.660114
CLPX	10845	NC_000015	chr15	-	65148219	65185404	5404	535.177	-0.134725	0.0726412	-1.85466	0.0636446	0.660114
CSMD3	114788	NC_000008	chr8	-	112222928	113437099	20567	2180.75	0.183146	0.0986558	1.85642	0.0633942	0.660114
DDPP	0	NC_000002	chr2	-	162077357	162077651	295	41.9594	0.248455	0.133892	1.85563	0.063506	0.660114
ENSG00000233020	0	NC_000001	chr1	+	70530526	70531492	967	38.217	0.281529	0.151881	1.85362	0.063793	0.660114
ENSG00000233467	0	NC_000023	chrX	-	148198014	148198878	865	134.887	0.237444	0.127845	1.85729	0.0632703	0.660114
FAP	2191	NC_000002	chr2	-	162170684	162243535	6600	43.2423	-0.267437	0.144086	-1.8561	0.06344	0.660114
FKBP4	2288	NC_000012	chr12	+	2794942	2805423	4716	2861.07	0.204238	0.110015	1.85646	0.0633884	0.660114
LGI3	203190	NC_000008	chr8	-	22146825	22156833	4425	2548.19	-0.248685	0.134145	-1.85385	0.0637613	0.660114
LHFPL1	340596	NC_000023	chrX	-	112630648	112680178	1939	67.0043	0.281633	0.151884	1.85427	0.0637008	0.660114
NFATC2IP	84901	NC_000016	chr16	+	28950937	28967097	6734	266.708	-0.186495	0.100551	-1.85473	0.0636351	0.660114
PID1	55022	NC_000002	chr2	-	228850526	229271341	3423	304.393	0.249574	0.134527	1.8552	0.0635683	0.660114
PLXNB3	5365	NC_000023	chrX	+	153764196	153779346	7316	888.045	-0.253958	0.136995	-1.85378	0.063771	0.660114
RAVER2	55225	NC_000001	chr1	+	64745095	64833232	6070	277.894	0.192839	0.103959	1.85495	0.0636039	0.660114
SPTY2D1-AS1	100506540	NC_000011	chr11	+	18599804	18610255	1437	47.3241	0.255033	0.137553	1.85407	0.0637286	0.660114
TBC1D12	23232	NC_000010	chr10	+	94402199	94536332	7664	310.25	-0.16812	0.0905949	-1.85573	0.0634921	0.660114
CRLS1	54675	NC_000020	chr20	+	6006089	6040072	6734	166.033	-0.197585	0.106617	-1.85323	0.06385	0.660273
VKORC1	79001	NC_000016	chr16	-	31090842	31095944	2972	293.763	0.158625	0.0856058	1.85297	0.0638861	0.660273
ARL4D	379	NC_000017	chr17	+	43398959	43401137	1612	188.875	-0.256344	0.138386	-1.85238	0.0639709	0.660463
COL6A1	1291	NC_000021	chr21	+	45981737	46005050	5388	1268.88	-0.238532	0.128928	-1.85012	0.0642963	0.660463
FAM129B	64855	NC_000009	chr9	-	127505338	127579007	4718	499.63	0.165196	0.0892521	1.85089	0.0641859	0.660463
GOLGA7B	401647	NC_000010	chr10	+	97850238	97871580	6459	573.931	0.193469	0.104609	1.84944	0.0643941	0.660463
HHLA3	11147	NC_000001	chr1	+	70354805	70385339	1222	72.2059	-0.22908	0.123795	-1.85048	0.0642439	0.660463
HPCA	3208	NC_000001	chr1	+	32885994	32898441	1991	2151.09	0.201419	0.108841	1.85058	0.0642302	0.660463
KIAA1715	80856	NC_000002	chr2	-	175923892	176002839	9346	364.787	0.180277	0.0974843	1.84929	0.0644157	0.660463
LINC01164	399827	NC_000010	chr10	-	131772398	131790199	3384	22.0149	-0.283619	0.153406	-1.84881	0.0644852	0.660463
LTK	4058	NC_000015	chr15	-	41503638	41513887	3490	27.81	-0.280176	0.151506	-1.84927	0.0644189	0.660463
PIRT	644139	NC_000017	chr17	-	10822475	10838445	3810	21.9485	0.235219	0.127228	1.84879	0.0644876	0.660463
PMS2	5395	NC_000007	chr7	-	5973239	6009125	4080	1824.46	-0.157997	0.0853533	-1.85109	0.0641569	0.660463
RALB	5899	NC_000002	chr2	+	120240064	120294713	2915	319.472	-0.174064	0.0939741	-1.85226	0.0639884	0.660463
SELENBP1	8991	NC_000001	chr1	-	151364302	151372734	3420	314.32	0.263696	0.142478	1.85079	0.0641994	0.660463
TSPO	706	NC_000022	chr22	+	43151514	43163242	1455	65.793	0.269377	0.145624	1.84981	0.0643412	0.660463
ZDHHC15	158866	NC_000023	chrX	-	75368427	75523502	7337	44.8149	0.252456	0.136366	1.85131	0.0641247	0.660463
GPRIN1	114787	NC_000005	chr5	-	176595802	176617357	4249	1051.58	0.222699	0.120542	1.84749	0.0646763	0.661522
SLC7A5P1	81893	NC_000016	chr16	-	29613103	29613717	615	81.8	-0.267369	0.144737	-1.84727	0.0647078	0.661522
TRPV2	51393	NC_000017	chr17	+	16415542	16437003	3526	206.768	0.2589	0.140113	1.8478	0.0646314	0.661522
CHORDC1	26973	NC_000011	chr11	-	90200429	90223364	10739	387.76	0.275925	0.149428	1.84654	0.0648133	0.661758
EYA1	2138	NC_000008	chr8	-	71197433	71547649	5410	268.795	0.266556	0.144435	1.8455	0.0649645	0.661758
GFRA1	2674	NC_000010	chr10	-	116056925	116273614	10022	121.355	-0.269282	0.145903	-1.84562	0.0649468	0.661758
GMPR	2766	NC_000006	chr6	+	16238580	16295549	2181	219.297	0.238033	0.128905	1.84658	0.0648076	0.661758
GPC6	10082	NC_000013	chr13	+	93226825	94408020	9085	101.78	0.228646	0.123868	1.84588	0.0649098	0.661758
SLC25A13	10165	NC_000007	chr7	-	96120220	96322147	6330	264.359	-0.222958	0.120766	-1.8462	0.0648627	0.661758
ARMCX4	100131755	NC_000023	chrX	+	101418263	101535988	15904	1184.47	-0.110962	0.0601552	-1.8446	0.0650956	0.661836
CLMN	79789	NC_000014	chr14	-	95181939	95319908	15246	334.126	-0.24227	0.13131	-1.84503	0.0650336	0.661836
HSPCP1	0	NC_000004	chr4	+	87891843	87894015	2173	5028.95	0.196565	0.106591	1.84411	0.065167	0.661836
MLLT10	8028	NC_000010	chr10	+	21534165	21743630	8500	748.38	-0.199168	0.107992	-1.84429	0.0651407	0.661836
TMEM191A	84222	NC_000022	chr22	+	20700932	20704603	2140	41.212	-0.265027	0.143714	-1.84413	0.0651642	0.661836
CITED2	10370	NC_000006	chr6	-	139371807	139374650	2565	3715.92	-0.240573	0.130474	-1.84384	0.0652071	0.661848
ENSG00000223651	0	NC_000020	chr20	-	41997131	41999397	2267	55.9035	-0.279759	0.151788	-1.84309	0.0653155	0.662552
SDF2L1	23753	NC_000022	chr22	+	21642253	21644299	1108	99.6884	0.266306	0.144558	1.84221	0.0654441	0.663461
HERC5	51191	NC_000004	chr4	+	88457117	88506170	4773	44.592	0.261225	0.141875	1.84124	0.0655871	0.664514
ELP4	26610	NC_000011	chr11	+	31509729	31784525	2767	230.408	0.186192	0.101202	1.83981	0.0657957	0.664874
GEN1	348654	NC_000002	chr2	+	17753858	17788941	12504	41.0058	-0.28063	0.152571	-1.83934	0.0658656	0.664874
LPIN2	9663	NC_000018	chr18	-	2916994	3013315	6752	1625.6	0.159749	0.0868623	1.83911	0.0658996	0.664874
PELI3	246330	NC_000011	chr11	+	66466327	66477337	3211	321.579	-0.164069	0.0891711	-1.83994	0.0657777	0.664874
SERTAD2	9792	NC_000002	chr2	-	64631621	64751091	8154	247.698	-0.250156	0.135967	-1.83983	0.0657929	0.664874
SULT1A1	6817	NC_000016	chr16	-	28605196	28623625	8909	587.042	-0.268971	0.146239	-1.83925	0.0658787	0.664874
TTC28	23331	NC_000022	chr22	-	27978014	28679865	12926	1163.14	0.138782	0.0754566	1.83923	0.0658811	0.664874
VTI1A	143187	NC_000010	chr10	+	112446998	112855368	15349	328.719	0.151793	0.0825475	1.83886	0.0659357	0.664874
NDC1	55706	NC_000001	chr1	-	53765460	53838860	5288	104.515	0.212183	0.115408	1.83855	0.0659809	0.664936
CRIPAK	285464	NC_000004	chr4	+	1391552	1395994	4443	1172.54	-0.242299	0.131831	-1.83796	0.0660686	0.665216
SCUBE3	222663	NC_000006	chr6	+	35214047	35253079	7800	82.9064	-0.249326	0.135663	-1.83783	0.066087	0.665216
FKBP1B	2281	NC_000002	chr2	+	24024153	24063681	1887	43.0605	0.273367	0.148799	1.83715	0.0661874	0.665832
TMED5	50999	NC_000001	chr1	-	93149742	93180728	9425	161.601	0.250494	0.136391	1.83658	0.0662713	0.666281
MGAT3	4248	NC_000022	chr22	+	39447224	39492194	6217	1075.45	0.147096	0.0801417	1.83545	0.0664395	0.667578
AK024681	0	NC_000006	chr6	-	13288131	13290482	2352	305.393	-0.227776	0.124143	-1.83479	0.0665371	0.668163
ARRDC3	57561	NC_000005	chr5	-	91368724	91383359	4831	329.254	-0.268852	0.146587	-1.83408	0.0666422	0.668429
DSC2	1824	NC_000018	chr18	-	31058840	31102425	12439	157.85	0.265124	0.144543	1.83423	0.0666204	0.668429
ERC1	23085	NC_000012	chr12	+	990509	1495933	12605	2407.58	0.156659	0.0854481	1.83338	0.0667462	0.669077
CHST10	9486	NC_000002	chr2	-	100391860	100417668	4499	726.422	-0.168132	0.0917571	-1.83236	0.0668971	0.669519
PCDHGC4	56098	NC_000005	chr5	+	141484997	141512979	4974	9145.1	0.1996	0.108935	1.83229	0.0669085	0.669519
TMEM53	79639	NC_000001	chr1	-	44635238	44674579	3971	476.179	-0.16343	0.0891724	-1.83274	0.066841	0.669519
MRC1	4360	NC_000010	chr10	+	17809343	17911170	5199	1034.95	0.278352	0.151945	1.83192	0.0669633	0.669673
ENSG00000226432	0	NC_000005	chr5	+	24170370	24171246	877	243.658	0.19963	0.109004	1.83141	0.0670396	0.669928
PLEKHF2	79666	NC_000008	chr8	+	95133721	95156685	3221	176.508	0.250092	0.136571	1.83122	0.0670677	0.669928
CMSS1	84319	NC_000003	chr3	+	99817834	100178632	3938	457.598	0.191501	0.104641	1.83008	0.0672378	0.670716
CREB3L4	148327	NC_000001	chr1	+	153967534	153974364	3127	41.2075	-0.274941	0.150406	-1.82798	0.067552	0.670716
ERCC8	1161	NC_000005	chr5	-	60873831	60945078	5172	180.153	-0.170248	0.0931111	-1.82844	0.067484	0.670716
GTF2IRD1	9569	NC_000007	chr7	+	74453790	74602605	6655	413.709	0.183997	0.100672	1.82768	0.0675973	0.670716
INO80C	125476	NC_000018	chr18	-	35452230	35498144	5346	153.811	0.230273	0.125862	1.82957	0.0673143	0.670716
RGPD2	729857	NC_000002	chr2	-	87755955	87825952	7646	74.9591	0.22846	0.124844	1.82996	0.0672554	0.670716
SATB2	23314	NC_000002	chr2	-	199269500	199471266	11784	5329.55	-0.124144	0.067873	-1.82907	0.0673897	0.670716
ST3GAL6	10402	NC_000003	chr3	+	98732236	98821201	7469	153.709	-0.228587	0.124947	-1.82947	0.0673299	0.670716
TBXAS1	6916	NC_000007	chr7	+	139777051	140020325	6271	163.993	0.256537	0.140327	1.82814	0.0675284	0.670716
USP17L4	645402	NC_000008	chr8	+	7337115	7338707	1593	29.7625	0.245229	0.134186	1.82753	0.0676203	0.670716
WWC2	80014	NC_000004	chr4	+	183099273	183320777	9998	823.323	0.176574	0.0966103	1.82769	0.0675954	0.670716
XIAP	331	NC_000023	chrX	+	123859724	123913979	9025	3246.55	0.198197	0.10838	1.82871	0.0674428	0.670716
OCIAD1	54940	NC_000004	chr4	+	48830582	48861817	5572	691.568	-0.133887	0.0733303	-1.8258	0.0678799	0.672898
CCT5	22948	NC_000005	chr5	+	10249921	10266412	5837	1810.51	0.186975	0.102422	1.82553	0.0679213	0.672916
FOXP1	27086	NC_000003	chr3	-	70954693	71583989	16936	1050.97	-0.156152	0.0855512	-1.82525	0.0679638	0.672944
PTK7	5754	NC_000006	chr6	+	43076268	43161720	8719	134.982	-0.225747	0.123707	-1.82485	0.0680244	0.673152
PRSS35	167681	NC_000006	chr6	+	83512475	83525704	2608	68.061	0.247182	0.13549	1.82435	0.0680993	0.673501
ENSG00000251548	0	NC_000005	chr5	-	10664495	10665113	619	399.902	0.170092	0.0932803	1.82345	0.0682348	0.674176
FAM50B	26240	NC_000006	chr6	+	3849386	3851317	1932	171.721	0.205385	0.112641	1.82335	0.0682501	0.674176
PCOLCE2	26577	NC_000003	chr3	-	142815922	142889203	3489	24.3312	0.262946	0.144229	1.82311	0.0682866	0.674176
LOC285074	285074	NC_000002	chr2	-	87030675	87076413	3949	101.171	-0.254269	0.139517	-1.8225	0.0683796	0.674703
A1BG-AS1	503538	NC_000019	chr19	+	58351970	58355183	2130	94.1151	0.242628	0.133473	1.81781	0.069093	0.674846
ARHGAP29	9411	NC_000001	chr1	-	94148988	94275068	19005	708.049	-0.265583	0.146056	-1.81837	0.0690074	0.674846
DIAPH2	1730	NC_000023	chrX	+	96684663	97604997	9551	309.551	0.237574	0.130624	1.81876	0.0689486	0.674846
DYNLL2	140735	NC_000017	chr17	+	58083415	58095536	6805	679.08	-0.143764	0.079125	-1.81693	0.0692283	0.674846
ENSG00000213962	0	NC_000002	chr2	-	177997273	177998770	1498	88.2526	-0.232344	0.12767	-1.81988	0.0687771	0.674846
ENSG00000224946	0	NC_000007	chr7	-	33276834	33277091	258	91.6955	0.254033	0.139445	1.82174	0.0684946	0.674846
ENSG00000231610	0	NC_000002	chr2	-	6495877	6496798	922	25.1913	0.278681	0.153137	1.81982	0.0687861	0.674846
GLTSCR1L	23506	NC_000006	chr6	+	42746958	42868560	7955	856.653	-0.13798	0.0757299	-1.822	0.0684555	0.674846
HS3ST4	9951	NC_000016	chr16	+	25692026	26137688	3203	365.631	-0.277581	0.152637	-1.81857	0.068977	0.674846
KBTBD12	166348	NC_000003	chr3	+	127915232	127987671	5848	63.5829	-0.253421	0.139273	-1.8196	0.0688196	0.674846
LINC00265	349114	NC_000007	chr7	+	39791901	39794617	2180	266.007	-0.240035	0.132079	-1.81736	0.0691616	0.674846
LOXL4	84171	NC_000010	chr10	-	98247686	98268250	3852	28.2198	-0.278813	0.153357	-1.81807	0.069054	0.674846
MRPL41	64975	NC_000009	chr9	+	137551199	137552555	1262	170.31	0.202744	0.111334	1.82104	0.0686001	0.674846
MRPS6	64968	NC_000021	chr21	+	34073523	34143034	4157	183.591	0.207901	0.114199	1.82052	0.0686793	0.674846
SDSL	113675	NC_000012	chr12	+	113422237	113438277	2004	50.7238	-0.268573	0.147767	-1.81755	0.0691332	0.674846
SRGAP2	23380	NC_000001	chr1	+	206203346	206464443	18661	993.814	0.171764	0.0944884	1.81783	0.0690901	0.674846
SUPT16H	11198	NC_000014	chr14	-	21351472	21384266	6356	1352.45	-0.134509	0.0739704	-1.81841	0.069001	0.674846
SUPV3L1	6832	NC_000010	chr10	+	69180232	69209099	4283	501.073	-0.131641	0.0724322	-1.81743	0.0691506	0.674846
TCTEX1D2	255758	NC_000003	chr3	-	196291219	196318299	1043	45.9182	0.262713	0.144278	1.82088	0.0686259	0.674846
ZDHHC1	29800	NC_000016	chr16	-	67394419	67416833	3261	62.4317	-0.230786	0.126737	-1.82098	0.0686099	0.674846
ZNF410	57862	NC_000014	chr14	+	73851971	73932511	5802	468.69	0.1603	0.0882169	1.81711	0.0692008	0.674846
TAF11	6882	NC_000006	chr6	-	34877778	34888089	1580	323.183	-0.151736	0.0835701	-1.81567	0.0694212	0.676339
C9orf89	84270	NC_000009	chr9	+	93096168	93113283	3867	236.172	-0.175052	0.0966168	-1.81182	0.0700144	0.676917
CA7	766	NC_000016	chr16	+	66844379	66854153	1862	131.676	-0.24592	0.135869	-1.80998	0.070299	0.676917
CLASRP	11129	NC_000019	chr19	+	45039040	45070956	6144	1102.38	-0.220647	0.121587	-1.81472	0.0695666	0.676917
CLNS1B	0	NC_000006	chr6	-	54485169	54485850	682	36.5998	-0.260522	0.14384	-1.8112	0.0701104	0.676917
CSF3R	1441	NC_000001	chr1	-	36466043	36483314	8723	112.668	0.237945	0.131592	1.8082	0.0705749	0.676917
DCHS2	54798	NC_000004	chr4	-	154232037	154491778	16345	756.417	0.249736	0.137745	1.81303	0.0698279	0.676917
EGR1	1958	NC_000005	chr5	+	138465480	138469315	3148	1109.78	-0.264138	0.146062	-1.8084	0.0705441	0.676917
EMID1	129080	NC_000022	chr22	+	29205851	29259597	7018	80.2078	0.260528	0.143721	1.81274	0.0698726	0.676917
ENSG00000279232	0	NC_000005	chr5	-	98792863	98795766	2904	191.035	0.248944	0.137562	1.80969	0.0703437	0.676917
FAM108A7P	0	NC_000017	chr17	+	20814620	20844257	1044	28.4417	-0.270842	0.149815	-1.80785	0.0706302	0.676917
FPGT-TNNI3K	100526835	NC_000001	chr1	+	74198212	74544432	9103	60.0661	-0.249309	0.137871	-1.80828	0.0705624	0.676917
GPR39	2863	NC_000002	chr2	+	132416574	132646596	3424	73.9039	0.273756	0.150963	1.8134	0.0697699	0.676917
HSPE1	3336	NC_000002	chr2	+	197499994	197503463	1567	94.5459	0.246113	0.13602	1.80938	0.0703913	0.676917
ICA1	3382	NC_000007	chr7	-	8113184	8262687	4313	1441.95	-0.158287	0.0875664	-1.80762	0.0706656	0.676917
ITGB8	3696	NC_000007	chr7	+	20330702	20415759	15172	1903.7	0.224628	0.12394	1.81239	0.0699256	0.676917
LCNL1	401562	NC_000009	chr9	+	136981904	136986410	4052	38.608	-0.275443	0.151963	-1.81257	0.0698987	0.676917
LOC729815	729815	NC_000010	chr10	-	79506359	79511250	2292	58.3505	-0.219824	0.121457	-1.80989	0.070313	0.676917
NADSYN1	55191	NC_000011	chr11	+	71453109	71524107	17605	498.269	-0.206328	0.114164	-1.8073	0.0707156	0.676917
OBFC1	79991	NC_000010	chr10	-	103870302	103918287	7281	104.183	-0.214692	0.118748	-1.80796	0.0706132	0.676917
PALM2-AKAP2	445815	NC_000009	chr9	+	109780297	110172512	8215	952.188	-0.175635	0.0969512	-1.81158	0.0700507	0.676917
PLEKHA2	59339	NC_000008	chr8	+	38901235	38973912	6329	446.863	0.210944	0.116703	1.80752	0.0706815	0.676917
PPAP2B	8613	NC_000001	chr1	-	56494747	56645301	5286	1322.11	0.199595	0.110075	1.81326	0.0697923	0.676917
RARRES2	5919	NC_000007	chr7	-	150333944	150341683	2056	54.9773	-0.233572	0.129115	-1.80902	0.0704477	0.676917
RNF152	220441	NC_000018	chr18	-	61808063	61894401	11491	31.0694	-0.274149	0.151256	-1.81248	0.0699118	0.676917
RPL18A	6142	NC_000012	chr12	+	104265278	104265891	614	171.705	0.196167	0.108536	1.80739	0.0707007	0.676917
SALL1	6299	NC_000016	chr16	-	51135975	51152314	5677	1899.63	0.167762	0.0928039	1.80771	0.0706518	0.676917
SLAIN1	122060	NC_000013	chr13	+	77697737	77764242	4595	1421.31	-0.194644	0.107264	-1.81463	0.0695813	0.676917
SSC5D	284297	NC_000019	chr19	+	55488404	55519099	7315	373.86	0.246421	0.136192	1.80936	0.0703952	0.676917
TMEM170B	100113407	NC_000006	chr6	+	11538227	11583524	8413	501.703	0.225016	0.124044	1.81399	0.0696786	0.676917
TTYH2	94015	NC_000017	chr17	+	74213514	74262020	5364	545.19	-0.257442	0.141946	-1.81366	0.0697298	0.676917
ZNRF3	84133	NC_000022	chr22	+	28883592	29057488	7059	456.472	0.236363	0.130722	1.80814	0.070585	0.676917
FADD	8772	NC_000011	chr11	+	70203163	70207402	2426	53.2422	-0.247644	0.137057	-1.80687	0.070783	0.677181
ANO7	50636	NC_000002	chr2	+	241188509	241225377	5624	44.3447	-0.276364	0.153049	-1.80572	0.0709617	0.677612
NEXN	91624	NC_000001	chr1	+	77888513	77946324	6867	38.1201	-0.276715	0.153254	-1.80559	0.0709822	0.677612
PRMT7	54496	NC_000016	chr16	+	68310974	68358563	11246	494.298	-0.180127	0.0997624	-1.80556	0.0709876	0.677612
RHOC/PPM1J	0	NC_000001	chr1	-	112702614	112711433	1009	159.424	0.209553	0.116047	1.80577	0.0709551	0.677612
DRAXIN	374946	NC_000001	chr1	+	11691724	11725857	7351	34.8747	0.260892	0.144565	1.80467	0.0711268	0.67856
RNF157	114804	NC_000017	chr17	-	76142453	76240373	5512	1146.5	-0.136792	0.0758151	-1.80429	0.0711859	0.678743
METTL7A	25840	NC_000012	chr12	+	50923472	50932517	4083	1649.09	0.223902	0.124133	1.80373	0.0712734	0.678876
PCDHGC5	56097	NC_000005	chr5	+	141489121	141512979	4990	9581.07	0.197951	0.109748	1.80369	0.0712797	0.678876
AK311005	0	NC_000003	chr3	-	41220847	41225051	1242	955.227	0.116002	0.0644861	1.79887	0.0720396	0.679991
ARMCX3	51566	NC_000023	chrX	+	101622797	101627843	4239	67.6631	-0.233192	0.129741	-1.79737	0.0722773	0.679991
CDK14	5218	NC_000007	chr7	+	90563774	91210590	6611	1994.26	-0.135464	0.0752983	-1.79903	0.0720134	0.679991
CROCCP	0	NC_000023	chrX	+	135432960	135438634	5675	91.2842	0.250539	0.139171	1.80022	0.0718259	0.679991
ENSG00000233292	0	NC_000010	chr10	+	89139044	89139458	415	29.4725	0.275394	0.153015	1.79979	0.0718944	0.679991
ENSG00000254612	0	NC_000011	chr11	-	127940913	127941654	742	671.811	0.15039	0.0835937	1.79906	0.0720097	0.679991
EPS15	2060	NC_000001	chr1	-	51354263	51519354	7699	4717.42	-0.167964	0.0934443	-1.79748	0.07226	0.679991
GNG13	51764	NC_000016	chr16	-	798041	800733	984	83.461	-0.271579	0.151019	-1.79831	0.0721284	0.679991
GXL_1223680	0	NC_000011	chr11	-	117800844	117844107	3847	172.412	0.229773	0.127512	1.80196	0.0715511	0.679991
HADHB	3032	NC_000002	chr2	+	26243170	26290468	4337	1172.28	0.187429	0.104181	1.79908	0.0720067	0.679991
IL17RD	54756	NC_000003	chr3	-	57089982	57170306	9581	113.588	0.242865	0.134788	1.80183	0.071572	0.679991
IQSEC3	440073	NC_000012	chr12	+	66765	178460	7686	1583.67	-0.178886	0.0992636	-1.80213	0.0715254	0.679991
KLF16	83855	NC_000019	chr19	-	1852399	1863568	2890	382.578	0.237586	0.13194	1.80071	0.0717488	0.679991
LHFPL3	375612	NC_000007	chr7	+	104328656	104908558	3255	90.1585	0.239127	0.133025	1.79761	0.0722389	0.679991
LMCD1	29995	NC_000003	chr3	+	8501707	8568125	5349	53.0417	0.274779	0.152844	1.79777	0.0722137	0.679991
MCUR1	63933	NC_000006	chr6	-	13786549	13814568	6065	117.793	0.193377	0.107556	1.79792	0.0721892	0.679991
MICA	100507436	NC_000006	chr6	+	31494881	31511124	2626	23.8377	0.274261	0.152398	1.79964	0.0719181	0.679991
MICB	4277	NC_000006	chr6	+	31494881	31511124	2798	23.8377	0.274261	0.152398	1.79964	0.0719181	0.679991
MLLT4-AS1	653483	NC_000006	chr6	-	167823890	167826788	2303	36.3953	-0.275826	0.153318	-1.79905	0.0720112	0.679991
OPHN1	4983	NC_000023	chrX	-	68042344	68433913	12192	222.016	0.237738	0.131996	1.80109	0.0716881	0.679991
PPP6R3	55291	NC_000011	chr11	+	68460718	68615334	9421	908.853	-0.153196	0.0850802	-1.80061	0.0717642	0.679991
PRSS54	221191	NC_000016	chr16	-	58279997	58295047	1810	114.007	0.24192	0.134524	1.79833	0.0721243	0.679991
SLC6A6P	0	NC_000021	chr21	+	19244543	19246392	1850	32.2413	-0.272183	0.151497	-1.79662	0.072396	0.68073
MFSD2A	84879	NC_000001	chr1	+	39955112	39969968	5539	284.73	0.227727	0.126772	1.79635	0.0724386	0.680755
CREBZF	58487	NC_000011	chr11	-	85657564	85682863	7722	706.343	-0.228238	0.127082	-1.79598	0.0724973	0.68093
TFEB	7942	NC_000006	chr6	-	41683978	41736259	5838	108.481	-0.249681	0.139046	-1.79568	0.0725461	0.681011
EIF4G3	8672	NC_000001	chr1	-	20806292	21176888	9005	4009.38	-0.106735	0.0594724	-1.7947	0.0727009	0.681335
ENSG00000233830	0	NC_000007	chr7	-	27458163	27458849	687	236.43	-0.153995	0.0858033	-1.79474	0.0726946	0.681335
THOC5	8563	NC_000022	chr22	-	29505879	29555216	8238	537.857	-0.152665	0.0850581	-1.79483	0.07268	0.681335
RCAN2	10231	NC_000006	chr6	-	46220730	46492067	4131	1260.13	-0.230978	0.128726	-1.79433	0.0727599	0.681512
PGAM2	5224	NC_000007	chr7	-	44062727	44065587	857	757.49	0.246433	0.137379	1.79382	0.0728427	0.681536
PIGN	23556	NC_000018	chr18	-	62043567	62187118	6264	232.826	-0.174127	0.097062	-1.79398	0.0728162	0.681536
ACAD8	27034	NC_000011	chr11	+	134253495	134265855	8024	801.209	-0.16816	0.0938695	-1.79143	0.073225	0.683241
ARC	23237	NC_000008	chr8	-	142611044	142614472	2991	98.9799	-0.242	0.135107	-1.79117	0.0732662	0.683241
BIN2	51411	NC_000012	chr12	-	51281038	51324668	4010	82.3816	0.25003	0.139542	1.79179	0.0731672	0.683241
DDR1	780	NC_000006	chr6	+	30876421	30900156	8999	1569.37	0.180754	0.100907	1.79129	0.0732467	0.683241
DOK4	55715	NC_000016	chr16	-	57471958	57487327	4752	228.665	0.238265	0.132988	1.79163	0.0731925	0.683241
TCEA1	0	NC_000003	chr3	+	37275693	37276598	906	451.542	0.127132	0.0709511	1.79182	0.0731616	0.683241
CASC15	401237	NC_000006	chr6	+	21664772	22195820	7047	44.4107	-0.25979	0.145109	-1.79031	0.0734036	0.683246
FBXO16	157574	NC_000008	chr8	-	28428408	28490318	1672	141.713	-0.205319	0.114668	-1.79055	0.073365	0.683246
LPP	4026	NC_000003	chr3	+	188153310	188890671	20562	506.125	0.204598	0.11429	1.79016	0.0734275	0.683246
NDRG3	57446	NC_000020	chr20	-	36651766	36746138	5334	964.03	-0.145092	0.0810341	-1.79051	0.0733721	0.683246
ALG9	79796	NC_000011	chr11	-	111782195	111879421	9114	336.658	-0.158051	0.0883734	-1.78845	0.0737033	0.683396
ATG16L1	55054	NC_000002	chr2	+	233251571	233295674	6223	680.132	-0.179167	0.100214	-1.78785	0.0738007	0.683396
C3orf58	205428	NC_000003	chr3	+	143971798	143992368	5000	423.953	-0.217747	0.121794	-1.78783	0.073804	0.683396
CIRH1A	84916	NC_000016	chr16	+	69132515	69231130	5798	1153.28	-0.167291	0.0935438	-1.78837	0.073716	0.683396
ENTPD4	9583	NC_000008	chr8	-	23385783	23457731	7100	875.47	-0.155102	0.0867107	-1.78873	0.0736586	0.683396
EPCAM	4072	NC_000002	chr2	+	47345163	47387601	2514	46.2139	0.256865	0.143694	1.78758	0.0738442	0.683396
FGD4	121512	NC_000012	chr12	+	32399634	32646050	10668	701.329	0.221693	0.123979	1.78815	0.0737518	0.683396
HIST1H2BD	3017	NC_000006	chr6	+	26157843	26171349	1384	272.522	0.186742	0.104418	1.78841	0.0737099	0.683396
HSP90B2P	7190	NC_000015	chr15	+	99257525	99260276	2752	607.713	0.240324	0.134442	1.78757	0.0738459	0.683396
PPARA	5465	NC_000022	chr22	+	46150521	46243756	13246	343.498	0.226765	0.126816	1.78814	0.0737533	0.683396
HIST1H2BE	8344	NC_000006	chr6	+	26183795	26184230	436	172.495	0.224263	0.125516	1.78673	0.0739813	0.683745
LENG1	79165	NC_000019	chr19	-	54155161	54159882	1542	95.0478	0.210294	0.117698	1.78672	0.0739821	0.683745
SLC29A1	2030	NC_000006	chr6	+	44219505	44234151	3779	1159.75	-0.191862	0.10739	-1.78659	0.0740043	0.683745
PPIP5K1	9677	NC_000015	chr15	-	43533462	43590253	8075	839.098	-0.169062	0.0946546	-1.78609	0.0740839	0.684109
ANK1	286	NC_000008	chr8	-	41653220	41896762	10799	1061.97	-0.253356	0.142039	-1.7837	0.0744718	0.684372
ENSG00000226491	0	NC_000002	chr2	-	42797225	42798712	861	100.985	-0.221981	0.12441	-1.78426	0.074381	0.684372
ENSG00000231434	0	NC_000001	chr1	+	158523672	158525838	2167	337.377	0.232555	0.130393	1.7835	0.0745049	0.684372
HSP90AB1	3326	NC_000006	chr6	+	44246166	44253888	3117	29733.7	0.176851	0.0991169	1.78427	0.07438	0.684372
HSPA2	3306	NC_000014	chr14	+	64535905	64546173	5777	3908.76	-0.24557	0.137714	-1.78319	0.0745555	0.684372
MORN3	283385	NC_000012	chr12	-	121651118	121672631	1480	62.8559	0.260686	0.146044	1.78498	0.0742649	0.684372
SMARCA2	6595	NC_000009	chr9	+	2015219	2193624	7615	6297.63	0.138578	0.0777094	1.78328	0.07454	0.684372
SUZ12	23512	NC_000017	chr17	+	31937018	32001045	6547	208.93	-0.209966	0.117709	-1.78378	0.0744597	0.684372
UBA1	7317	NC_000023	chrX	+	47190800	47215128	8207	9849.87	0.112056	0.0628172	1.78384	0.0744499	0.684372
WDR66	144406	NC_000012	chr12	+	121917862	122003927	15899	176.698	0.250779	0.140455	1.78548	0.0741835	0.684372
YTHDC1	91746	NC_000004	chr4	-	68310387	68350106	6680	2967.69	-0.11248	0.0630266	-1.78464	0.0743189	0.684372
CCDC117	150275	NC_000022	chr22	+	28772674	28789301	5171	195.486	0.232437	0.130423	1.78218	0.0747206	0.684714
GPR123	84435	NC_000010	chr10	+	133070929	133131675	6410	321.801	-0.212993	0.119482	-1.78264	0.0746451	0.684714
RAPGEF6	51735	NC_000005	chr5	-	131423921	131635236	11056	1026.13	-0.175441	0.098451	-1.78202	0.0747465	0.684714
RHBDL2	54933	NC_000001	chr1	-	38885806	38941784	4950	48.3583	-0.27186	0.152561	-1.78197	0.074754	0.684714
AK124068	0	NC_000006	chr6	-	35226503	35228269	1767	31.0923	-0.264692	0.14859	-1.78135	0.0748545	0.684912
LMF1	64788	NC_000016	chr16	-	853634	981318	10387	8794.25	-0.187346	0.10518	-1.7812	0.0748802	0.684912
MPP5	64398	NC_000014	chr14	+	67241109	67336061	8536	586.063	0.162105	0.0910245	1.78089	0.0749297	0.684912
PCDHB14	56122	NC_000005	chr5	+	141222932	141227759	4828	813.075	0.153521	0.0862113	1.78075	0.0749527	0.684912
TCP1	6950	NC_000006	chr6	-	159778498	159789749	4767	1730.65	0.160399	0.0900815	1.7806	0.0749771	0.684912
ARHGAP21	57584	NC_000010	chr10	-	24583609	24723668	11393	4704.05	-0.127485	0.0716554	-1.77914	0.0752166	0.684978
CES4A	283848	NC_000016	chr16	+	66988585	67009758	6539	673.048	-0.226302	0.127155	-1.77973	0.0751198	0.684978
ENSG00000230584	0	NC_000013	chr13	+	78908919	78910542	1624	216.963	0.220638	0.124002	1.77931	0.075189	0.684978
ENSG00000259948	0	NC_000015	chr15	-	89201091	89201768	678	197.567	0.185662	0.104411	1.77819	0.0753728	0.684978
HK2P	0	NC_000023	chrX	-	80571871	80574607	2737	48.3756	0.265474	0.149287	1.77829	0.075357	0.684978
HSPD1	3329	NC_000002	chr2	-	197486581	197500274	4117	2294.24	0.209746	0.117914	1.7788	0.0752722	0.684978
LYSMD4	145748	NC_000015	chr15	-	99715697	99733561	6331	162.335	-0.221989	0.124846	-1.7781	0.0753874	0.684978
SGK1	6446	NC_000006	chr6	-	134169246	134318112	7852	467.309	-0.200746	0.112784	-1.77992	0.0750891	0.684978
SYDE2	84144	NC_000001	chr1	-	85156873	85201609	9704	128.919	0.201569	0.113231	1.78015	0.0750509	0.684978
TAB3	257397	NC_000023	chrX	-	30827442	30975084	12891	513.991	-0.159	0.0893802	-1.77892	0.075253	0.684978
PCBP4	57060	NC_000003	chr3	-	51957454	51974016	5172	345.137	-0.188287	0.105918	-1.77767	0.075458	0.685252
CDK2AP1	8099	NC_000012	chr12	-	123260970	123272316	2156	986.553	0.230815	0.129942	1.77628	0.0756864	0.685894
FNDC5	252995	NC_000001	chr1	-	32862268	32872492	3300	201.091	-0.215253	0.121183	-1.77626	0.0756901	0.685894
IDS	3423	NC_000023	chrX	-	149476990	149533935	10496	13311.9	0.181908	0.102396	1.77652	0.075648	0.685894
TRAPPC1	58485	NC_000017	chr17	-	7930345	7932123	1171	935.479	-0.174596	0.0982787	-1.77654	0.0756435	0.685894
CIB2	10518	NC_000015	chr15	-	78104606	78131544	2303	114.387	0.239738	0.134997	1.77588	0.0757527	0.686095
ARHGAP5	394	NC_000014	chr14	+	32076114	32159728	10890	2394.73	0.173332	0.0976321	1.77536	0.0758392	0.686513
CHST1	8534	NC_000011	chr11	-	45647689	45665656	4761	779.108	0.188505	0.106272	1.77379	0.0760977	0.68812
PRR12	57479	NC_000019	chr19	+	49591643	49626439	7093	4021.92	0.146959	0.0828433	1.77394	0.0760732	0.68812
AK055108	0	NC_000007	chr7	-	130495794	130498427	2634	201.718	0.187148	0.105569	1.77275	0.0762699	0.689151
FGFR4	2264	NC_000005	chr5	+	177086886	177098144	4829	21.0784	0.271501	0.153164	1.77261	0.076293	0.689151
CLMP	79827	NC_000011	chr11	-	123069865	123195299	5115	32.5179	-0.268811	0.151682	-1.77219	0.0763623	0.689411
RPS6KA6	27330	NC_000023	chrX	-	84058346	84187935	8766	190.061	0.231646	0.13074	1.7718	0.0764273	0.689631
ABHD11	83451	NC_000007	chr7	-	73736094	73738867	2412	142.375	-0.192065	0.108434	-1.77127	0.0765158	0.68969
CBFB	865	NC_000016	chr16	+	67029147	67101058	3640	351.395	0.212131	0.119795	1.77078	0.0765976	0.68969
COL11A2	1302	NC_000006	chr6	-	33162681	33192499	6745	1100.89	-0.238164	0.134463	-1.77123	0.076523	0.68969
ME1	4199	NC_000006	chr6	-	83210389	83431219	3522	521.982	0.233609	0.131942	1.77054	0.0766368	0.68969
MGAT4C	25834	NC_000012	chr12	-	85955666	86838904	27815	132.654	0.254034	0.143477	1.77056	0.0766339	0.68969
AK125000	0	NC_000015	chr15	-	99128832	99131806	2562	7306.84	0.173567	0.0981069	1.76916	0.0768672	0.689835
CORO7	79585	NC_000016	chr16	-	4354542	4416961	6442	422.335	-0.197944	0.111832	-1.77001	0.076726	0.689835
GIMAP8	155038	NC_000007	chr7	+	150450630	150479395	4756	108.086	0.25024	0.141391	1.76984	0.0767542	0.689835
MICAL1	64780	NC_000006	chr6	-	109444062	109465968	7068	1110.68	-0.191917	0.108496	-1.76889	0.0769121	0.689835
PNLDC1	154197	NC_000006	chr6	+	159800249	159820704	2209	34.8707	-0.262492	0.148406	-1.76874	0.0769371	0.689835
PRKCA	5578	NC_000017	chr17	+	66302636	66810744	20838	2148.01	0.195045	0.110272	1.76877	0.076933	0.689835
SESTD1	91404	NC_000002	chr2	-	179101692	179264790	11349	631.701	-0.151652	0.0857303	-1.76895	0.0769025	0.689835
BNIP3P	0	NC_000014	chr14	+	28264390	28265974	1585	519.956	-0.162969	0.0921879	-1.76779	0.0770962	0.69017
SYCP2	10388	NC_000020	chr20	-	59863557	59933655	6690	90.5695	-0.266628	0.150802	-1.76807	0.0770493	0.69017
WBSCR27	155368	NC_000007	chr7	-	73834590	73842535	1469	23.2454	-0.24887	0.140773	-1.76788	0.0770805	0.69017
DOCK5	80005	NC_000008	chr8	+	25184772	25418082	15481	841.174	-0.261181	0.147782	-1.76734	0.0771714	0.690479
NPTXR	23467	NC_000022	chr22	-	38818451	38844012	5815	5964.4	0.253106	0.143237	1.76705	0.07722	0.69055
HNRNPH1	3187	NC_000005	chr5	-	179614178	179634784	9307	3499.74	-0.140695	0.0796347	-1.76675	0.0772695	0.690629
PHKA2	5256	NC_000023	chrX	-	18892298	18984598	9055	754.611	-0.165708	0.0938237	-1.76617	0.0773675	0.691141
ABCA2	20	NC_000009	chr9	-	137007227	137028922	11514	14200.6	-0.20872	0.118243	-1.76517	0.0775349	0.691183
RPS24	6229	NC_000010	chr10	+	78033760	78056813	7263	2727.46	0.184405	0.10446	1.76532	0.0775098	0.691183
SLC5A3/MRPS6	0	NC_000021	chr21	+	34073224	34143034	1106	179.71	0.200804	0.11372	1.76578	0.0774333	0.691183
ZKSCAN1	7586	NC_000007	chr7	+	100015572	100045178	11758	1651.2	-0.136443	0.0772914	-1.76531	0.077512	0.691183
ETNK1	55500	NC_000012	chr12	+	22625075	22690674	8198	875.187	0.185433	0.105097	1.7644	0.0776652	0.691982
BMP8B	656	NC_000001	chr1	-	39757182	39788861	5340	58.8848	-0.247594	0.140404	-1.76344	0.0778257	0.692094
CCDC88A	55704	NC_000002	chr2	-	55287842	55419921	16994	3782.56	-0.140721	0.0798027	-1.76336	0.0778396	0.692094
ITGA4	3676	NC_000002	chr2	+	181456892	181537747	9464	86.7161	0.269544	0.152859	1.76335	0.0778407	0.692094
RAI2	10742	NC_000023	chrX	-	17800049	17861337	2885	120.156	-0.200472	0.113686	-1.76338	0.077836	0.692094
METTL3	56339	NC_000014	chr14	-	21498133	21511375	6401	626.916	-0.121664	0.0690069	-1.76307	0.0778893	0.692163
SH2D5	400745	NC_000001	chr1	-	20719732	20732837	4423	437.76	0.231866	0.131598	1.76193	0.078081	0.693505
FOXO1	2308	NC_000013	chr13	-	40542366	40666597	5970	250.868	0.193505	0.109845	1.76162	0.0781341	0.693614
ENSG00000258930	0	NC_000014	chr14	-	71031686	71031970	285	183.084	0.230523	0.130896	1.76113	0.0782172	0.693988
ARPC2	10109	NC_000002	chr2	+	218217094	218254356	6168	1671.34	0.143944	0.0817516	1.76075	0.0782812	0.694195
ADPRHL1	113622	NC_000013	chr13	-	113421940	113453631	2420	125.015	-0.2513	0.142868	-1.75896	0.0785843	0.694345
ENSG00000224341	0	NC_000023	chrX	-	118877886	118879185	959	161.995	0.214121	0.121827	1.75758	0.0788182	0.694345
FNBP4	23360	NC_000011	chr11	-	47716503	47767460	8746	751.319	-0.227317	0.12927	-1.75847	0.0786682	0.694345
FRRS1L	23732	NC_000009	chr9	-	109130293	109167291	8197	1111.91	0.170255	0.0968769	1.75744	0.0788426	0.694345
GXL_1223228	0	NC_000011	chr11	+	57712605	57791586	585	290.016	-0.144893	0.0824529	-1.75728	0.0788703	0.694345
HUWE1	10075	NC_000023	chrX	-	53532096	53686752	17497	16582.1	0.11118	0.0632224	1.75856	0.078652	0.694345
IFFO1	25900	NC_000012	chr12	-	6538375	6556083	5401	624.521	-0.20618	0.117304	-1.75765	0.078807	0.694345
INSIG2	51141	NC_000002	chr2	+	118088452	118110997	3958	111.07	0.207104	0.117665	1.76011	0.078389	0.694345
KCNJ6	3763	NC_000021	chr21	-	37607376	37916446	22022	232.549	0.183224	0.10425	1.75755	0.078824	0.694345
NEFM	4741	NC_000008	chr8	+	24913012	24919098	4381	35449.9	-0.251289	0.142802	-1.7597	0.0784585	0.694345
RORB	6096	NC_000009	chr9	+	74497336	74693177	9620	704.265	-0.262011	0.148962	-1.75891	0.0785932	0.694345
RRP7A	27341	NC_000022	chr22	-	42501910	42519823	7808	279.851	-0.218107	0.12406	-1.75807	0.0787356	0.694345
SRPX2	27286	NC_000023	chrX	+	100644166	100671299	2420	72.8238	-0.26975	0.153364	-1.75889	0.0785962	0.694345
TMED1	11018	NC_000019	chr19	-	10832067	10836307	1970	87.5514	0.236402	0.134523	1.75733	0.0788611	0.694345
FSTL4	23105	NC_000005	chr5	-	133196455	133612564	6374	764.859	-0.259774	0.147867	-1.75681	0.0789505	0.69469
EXT1	2131	NC_000008	chr8	-	117794490	118111853	8270	738.401	-0.146567	0.0834557	-1.75623	0.0790491	0.695199
PPARD	5467	NC_000006	chr6	+	35342558	35428191	4660	639.032	-0.164511	0.0936898	-1.75591	0.0791031	0.695314
ATP2C1	27032	NC_000003	chr3	+	130850483	131016712	8270	2152.45	0.170585	0.0971721	1.75549	0.0791755	0.69559
C17orf70	80233	NC_000017	chr17	-	81539885	81552403	4809	297.441	-0.230921	0.131569	-1.75513	0.0792379	0.695778
AGPAT2	10555	NC_000009	chr9	-	136673143	136687459	1834	38.2857	0.258661	0.147431	1.75446	0.0793524	0.696423
MT1F	4494	NC_000016	chr16	+	56657694	56659303	1610	240.255	0.2688	0.153254	1.75396	0.0794378	0.696454
ROBO2	6092	NC_000003	chr3	+	75906694	77649964	15948	1252.94	0.214517	0.122304	1.75396	0.0794369	0.696454
KIAA1755	85449	NC_000020	chr20	-	38210488	38260772	9597	264.623	-0.221157	0.126145	-1.75319	0.0795694	0.697038
UMODL1	89766	NC_000021	chr21	+	42062959	42143453	7278	23.4989	-0.268736	0.153293	-1.75309	0.0795864	0.697038
MBD1	4152	NC_000018	chr18	-	50266882	50281774	7166	2556.52	0.118941	0.0678869	1.75204	0.0797666	0.698256
CACFD1	11094	NC_000009	chr9	+	133459965	133470848	3596	46.2171	0.253755	0.144892	1.75134	0.0798869	0.69841
COBLL1	22837	NC_000002	chr2	-	164653624	164843679	16956	258.066	-0.222902	0.127353	-1.75027	0.0800719	0.69841
GPR125	166647	NC_000004	chr4	-	22345071	22516054	9977	1276.71	0.214261	0.122402	1.75047	0.080038	0.69841
IQCE	23288	NC_000007	chr7	+	2558972	2614734	8950	609.253	0.147101	0.0840055	1.75109	0.0799303	0.69841
LSS	4047	NC_000021	chr21	-	46188141	46228824	8400	1657.72	-0.182631	0.104305	-1.75092	0.0799591	0.69841
RCBTB2	1102	NC_000013	chr13	-	48488959	48535982	4366	119.737	-0.217419	0.124191	-1.75069	0.0799998	0.69841
UBE2QL1	134111	NC_000005	chr5	+	6437347	6496721	6176	191.325	-0.198987	0.113627	-1.75123	0.0799062	0.69841
ABCA10	10349	NC_000017	chr17	-	69148007	69244846	8005	110.493	-0.23635	0.13515	-1.7488	0.0803258	0.699906
SLC4A3	6508	NC_000002	chr2	+	219627327	219641980	5676	2512.49	0.182971	0.104622	1.74887	0.0803127	0.699906
DAPK2	23604	NC_000015	chr15	-	63907036	64072033	14665	60.1841	-0.267889	0.153246	-1.7481	0.080447	0.700341
FBLN2	2199	NC_000003	chr3	+	13532324	13638422	5002	218.783	0.2499	0.142961	1.74803	0.0804582	0.700341
GRIN3A	116443	NC_000009	chr9	-	101569352	101738580	10191	1665.93	0.264119	0.151126	1.74767	0.0805204	0.700523
AK098707	0	NC_000020	chr20	-	34988975	34990998	1926	36.0811	-0.259205	0.148653	-1.74369	0.0812138	0.700571
CARF	79800	NC_000002	chr2	+	202912214	202987063	9021	308.698	-0.188845	0.108379	-1.74245	0.0814297	0.700571
DDAH1	23576	NC_000001	chr1	-	85318481	85578367	6734	739.785	0.183613	0.10534	1.74304	0.0813259	0.700571
ENSG00000228399	0	NC_000001	chr1	+	101256274	101256616	343	312.76	0.256165	0.147039	1.74215	0.0814815	0.700571
ENSG00000240579	0	NC_000007	chr7	-	127857852	127858488	637	47.6351	0.259147	0.14859	1.74404	0.0811522	0.700571
GNB3	2784	NC_000012	chr12	+	6839954	6847400	3443	67.0218	-0.264612	0.15172	-1.74408	0.0811449	0.700571
HIGD1A	25994	NC_000003	chr3	-	42757177	42804535	3336	115.635	0.216719	0.124074	1.74669	0.0806919	0.700571
IAH1	285148	NC_000002	chr2	+	9473818	9507230	6212	239.404	-0.138192	0.0791851	-1.74518	0.0809542	0.700571
LAMB3	3914	NC_000001	chr1	-	209614870	209652475	4958	183.945	-0.233799	0.133955	-1.74535	0.0809247	0.700571
LRRC6	23639	NC_000008	chr8	-	132570419	132684968	4266	272.516	-0.177118	0.10149	-1.74518	0.0809531	0.700571
MYO1E	4643	NC_000015	chr15	-	59132434	59372900	9106	271.879	-0.254855	0.145933	-1.74638	0.080745	0.700571
NCOA1	8648	NC_000002	chr2	+	24491932	24770702	8637	3623.22	0.131363	0.0752436	1.74583	0.0808404	0.700571
NEIL2	252969	NC_000008	chr8	+	11769663	11787346	3343	273.112	0.198252	0.113521	1.74639	0.0807429	0.700571
PGLS	25796	NC_000019	chr19	+	17511469	17521288	3028	210.528	0.188196	0.107873	1.7446	0.0810542	0.700571
RHOU	58480	NC_000001	chr1	+	228644647	228746669	4758	835.455	-0.243336	0.13947	-1.74472	0.081034	0.700571
SFSWAP	6433	NC_000012	chr12	+	131711081	131799738	10158	1532.28	-0.185567	0.106349	-1.74489	0.0810043	0.700571
SLC2A13	114134	NC_000012	chr12	-	39755021	40106045	8216	1269.92	0.164914	0.0945523	1.74416	0.0811318	0.700571
SLC9A1	6548	NC_000001	chr1	-	27098809	27166981	6200	1343.43	-0.16529	0.0948862	-1.74198	0.0815123	0.700571
SLCO2A1	6578	NC_000003	chr3	-	133932696	134030076	5189	49.4751	-0.267377	0.153266	-1.74453	0.081066	0.700571
SYNM	23336	NC_000015	chr15	+	99105035	99135595	7400	20663	0.169108	0.097079	1.74196	0.0815155	0.700571
TADA2A	6871	NC_000017	chr17	+	37406874	37479730	5344	314.575	-0.181567	0.104137	-1.74354	0.08124	0.700571
TSHR	7253	NC_000014	chr14	+	80954989	81146302	7449	85.7959	0.264167	0.151442	1.74434	0.0810995	0.700571
VAT1	10493	NC_000017	chr17	-	43014605	43025122	2961	415.685	0.204744	0.117484	1.74274	0.0813798	0.700571
ZNF664-FAM101A	100533183	NC_000012	chr12	+	123973215	124316024	2471	35.2084	0.262284	0.150528	1.74242	0.0814342	0.700571
MYL6P	0	NC_000021	chr21	-	43855890	43856342	453	74.6014	0.244813	0.140584	1.7414	0.081613	0.700701
SLC27A2	11001	NC_000015	chr15	+	50182196	50236395	2802	56.9299	0.246957	0.141807	1.7415	0.0815964	0.700701
TCF7L2	6934	NC_000010	chr10	+	112950219	113167678	6006	335.828	-0.172704	0.0991954	-1.74105	0.0816748	0.700877
AK098042	0	NC_000016	chr16	-	89113175	89115279	2105	42.0129	-0.229865	0.132268	-1.73787	0.0822331	0.701531
B3GALTL	145173	NC_000013	chr13	+	31199936	31332276	4591	173.975	-0.238896	0.137473	-1.73777	0.0822509	0.701531
CALN1	83698	NC_000007	chr7	-	71779491	72447151	10323	483.034	0.220019	0.126625	1.73756	0.0822878	0.701531
ELOVL1	64834	NC_000001	chr1	-	43363397	43368074	2507	251.552	-0.222396	0.127865	-1.73931	0.0819807	0.701531
ENSG00000183298	0	NC_000001	chr1	-	101786340	101787219	880	24.8856	-0.266767	0.153299	-1.74017	0.0818289	0.701531
GAB2	9846	NC_000011	chr11	-	78215290	78418348	6654	2326.16	-0.19958	0.114784	-1.73875	0.0820789	0.701531
GNA13	10672	NC_000017	chr17	-	65009289	65056839	6530	1240.52	0.163065	0.0937539	1.73929	0.0819838	0.701531
MANBA	4126	NC_000004	chr4	-	102631486	102760994	8439	381.12	0.205183	0.118073	1.73776	0.082253	0.701531
MAS1	4142	NC_000006	chr6	+	159906690	159916530	9841	44.5418	-0.247406	0.14238	-1.73764	0.0822742	0.701531
NLN	57486	NC_000005	chr5	+	65722196	65829283	12963	463.257	-0.129551	0.0745583	-1.73758	0.0822846	0.701531
RHBDD2	57414	NC_000007	chr7	+	75878948	75888926	1933	3003.89	0.155193	0.0892765	1.73834	0.0821505	0.701531
TRIP4	9325	NC_000015	chr15	+	64387748	64455303	2731	228.752	0.153785	0.0884215	1.73922	0.0819955	0.701531
TSTD1	100131187	NC_000001	chr1	-	161037631	161038990	1175	83.8112	0.242578	0.139591	1.73778	0.0822494	0.701531
SNRNP70	6625	NC_000019	chr19	+	49085208	49108613	4759	3038.84	-0.169368	0.0974973	-1.73716	0.0823597	0.701792
FUNDC1	139341	NC_000023	chrX	-	44523639	44543001	1399	208.518	-0.178633	0.102854	-1.73676	0.0824296	0.702036
CSNK2B	1460	NC_000006	chr6	+	31665880	31672346	3769	594.855	-0.150722	0.0868799	-1.73483	0.0827703	0.703639
EFCAB7	84455	NC_000001	chr1	+	63523342	63585370	7983	151.506	0.216287	0.124695	1.73453	0.0828248	0.703639
FYCO1	79443	NC_000003	chr3	-	45917899	45995824	9357	1555.67	0.165526	0.095443	1.73429	0.0828663	0.703639
MYO9B	4650	NC_000019	chr19	+	17075781	17213295	9384	2676.55	-0.23994	0.138315	-1.73473	0.0827887	0.703639
[truncated: 42,887 more rows]

## Sheet: mature miRNA tissue
mature miRNA name	baseMean	log2FoldChange	lfcSE	stat	pvalue	padj
hsa-miR-6887-3p	6.95856	-0.163238	0.338592	-0.482108	0.629729	0.91663
hsa-miR-6721-5p	7.8111	0.375259	0.324275	1.15723	0.24718	0.721861
hsa-miR-375	563.782	-0.404733	0.308249	-1.313	0.189182	0.662127
hsa-miR-4524b-5p	4.7049	0.123169	0.385945	0.319136	0.749624	NA
hsa-miR-371b-3p	9.93636	0.756509	0.405765	1.8644	0.0622657	0.390368
hsa-miR-597-3p	3.89568	-0.405686	0.377364	-1.07505	0.282351	NA
hsa-miR-1293	2.55846	-0.361381	0.415834	-0.869052	0.384819	NA
hsa-miR-499a-3p	7.61525	0.447785	0.339968	1.31714	0.187792	0.662127
hsa-miR-6502-5p	77.0243	0.0695712	0.214469	0.324389	0.745644	0.956135
hsa-miR-6821-3p	6.45615	-0.201335	0.356538	-0.564695	0.572281	0.898537
hsa-miR-4292	4.27702	0.734134	0.411587	1.78366	0.0744781	NA
hsa-miR-34c-5p	320.156	0.18766	0.298145	0.629424	0.529072	0.885244
hsa-miR-651-3p	1.68966	-0.553484	0.424097	-1.30509	0.191863	NA
hsa-miR-371a-3p	7.26604	-0.0957704	0.376674	-0.254253	0.7993	0.977595
hsa-miR-6750-3p	6.52423	0.281182	0.337923	0.832088	0.405359	0.839127
hsa-miR-211-5p	304.177	-0.334562	0.423087	-0.790763	0.429082	0.846047
hsa-miR-6863	2610.01	0.269975	0.414659	0.651077	0.514997	0.879255
hsa-miR-19b-1-5p	2.17867	0.433662	0.411349	1.05424	0.291772	NA
hsa-miR-548p	1.9321	-0.312707	0.422587	-0.739982	0.459311	NA
hsa-miR-766-5p	7.70266	-0.311712	0.336105	-0.927426	0.353706	0.80847
hsa-miR-98-3p	0.689082	0.111897	0.396692	0.282075	0.777886	NA
hsa-miR-129-2-3p	4384.74	0.115805	0.193726	0.59778	0.549987	0.893925
hsa-miR-641	41.0269	-0.15945	0.241216	-0.661028	0.508595	0.879255
hsa-miR-4771	2.33974	0.38547	0.414013	0.931056	0.351824	NA
hsa-miR-4684-5p	2.92433	0.442691	0.401041	1.10385	0.269657	NA
hsa-miR-6827-5p	2.17386	0.279375	0.419165	0.666503	0.505089	NA
hsa-miR-125b-2-3p	3094.65	0.0417851	0.154378	0.270667	0.786647	0.971456
hsa-miR-3132	0.234976	0.0776575	0.271918	0.285591	0.775191	NA
hsa-miR-644a	0.261736	-0.304695	0.306904	-0.992801	0.320807	NA
hsa-miR-4768-5p	1.79663	0.237675	0.423932	0.560645	0.57504	NA
hsa-miR-3142	2.23462	0.71636	0.417375	1.71635	0.0860986	NA
hsa-miR-4800-3p	11.9901	0.394921	0.315634	1.2512	0.210862	0.686004
hsa-miR-6825-5p	5.3359	-0.359057	0.364786	-0.984295	0.324971	0.794298
hsa-let-7f-5p	219348	-0.229701	0.174014	-1.32002	0.18683	0.662127
hsa-miR-548a-5p	6.59389	-0.39577	0.35161	-1.12559	0.260337	0.735123
hsa-miR-6813-3p	1.82401	0.248279	0.42404	0.585509	0.558205	NA
hsa-miR-3681-3p	6.01083	-0.0527877	0.361777	-0.145912	0.883991	0.988534
hsa-miR-1537-5p	4.94962	-0.0311979	0.414267	-0.0753088	0.939969	NA
hsa-miR-4714-5p	2.10259	-0.24409	0.412624	-0.591554	0.554149	NA
hsa-miR-148a-5p	96.362	0.210624	0.183069	1.15052	0.249929	0.724024
hsa-miR-1238-3p	3.59635	-0.472486	0.390603	-1.20963	0.22642	NA
hsa-miR-6880-3p	11.4349	-0.0697657	0.308767	-0.22595	0.821241	0.979612
hsa-miR-4432	1.11773	0.202303	0.412849	0.490018	0.624121	NA
hsa-miR-495-5p	8.91745	0.173298	0.320665	0.540434	0.588898	0.9008
hsa-miR-199b-5p	315.658	0.504902	0.207715	2.43074	0.0150679	0.173725
hsa-miR-1238-5p	0.81975	-0.119419	0.415612	-0.287333	0.773857	NA
hsa-miR-6839-5p	4.747	0.322128	0.398965	0.80741	0.41943	NA
hsa-miR-340-5p	13533.2	0.15869	0.185103	0.857306	0.391276	0.833919
hsa-miR-7107-3p	1.97419	-0.362294	0.424716	-0.853027	0.393645	NA
hsa-miR-6738-5p	4.5584	0.262105	0.398044	0.658484	0.510227	NA
hsa-miR-4523	7.38133	0.416361	0.342116	1.21702	0.223598	0.694636
hsa-miR-3118	1.18714	-0.864423	0.419837	-2.05895	0.0394992	NA
hsa-miR-520h	1.06826	-0.41113	0.421654	-0.975042	0.32954	NA
hsa-miR-4307	3.23213	-0.73244	0.39701	-1.84489	0.0650534	NA
hsa-miR-3670	3.55474	0.70077	0.405527	1.72805	0.0839796	NA
hsa-miR-6741-3p	12.7203	-0.241138	0.277437	-0.869165	0.384757	0.833919
hsa-miR-1179	236.386	0.336741	0.168822	1.99466	0.0460802	0.333856
hsa-miR-4477a	3.24252	0.16913	0.415273	0.407274	0.683807	NA
hsa-miR-4715-3p	27.8542	-0.458813	0.25016	-1.83407	0.0666429	0.407823
hsa-miR-525-3p	0.229305	0.0492536	0.317157	0.155297	0.876587	NA
hsa-miR-6512-3p	268.616	1.30594	0.224711	5.81162	6.18698e-09	1.90064e-06
hsa-miR-1285-5p	12.995	-0.305799	0.311663	-0.981185	0.326501	0.794298
hsa-miR-639	1.34805	-0.353414	0.422887	-0.835717	0.403314	NA
hsa-miR-106b-3p	52.241	-0.00569731	0.26596	-0.0214217	0.982909	0.99391
hsa-miR-4777-3p	6.70968	0.523954	0.35507	1.47564	0.140042	0.581363
hsa-miR-4738-5p	6.22996	0.334662	0.344566	0.971254	0.331422	0.794298
hsa-miR-196a-5p	0.623086	-0.381929	0.394588	-0.967919	0.333085	NA
hsa-miR-5582-3p	15.8573	0.400966	0.416135	0.963546	0.335273	0.797183
hsa-miR-3660	3.8569	-0.719468	0.400017	-1.79859	0.0720833	NA
hsa-miR-6504-5p	6.77343	0.169253	0.349698	0.483997	0.628388	0.91663
hsa-miR-4756-3p	1.00554	0.0452379	0.418885	0.107996	0.913999	NA
hsa-miR-4666a-5p	3.20446	0.417133	0.394584	1.05715	0.290445	NA
hsa-miR-127-5p	1219.75	0.379775	0.181208	2.0958	0.0361004	0.291271
hsa-miR-146b-5p	24033.7	-0.0450105	0.260933	-0.172498	0.863046	0.986338
hsa-miR-6760-3p	11.9804	0.037439	0.295764	0.126584	0.89927	0.988534
hsa-miR-548au-3p	0.825085	-0.188081	0.415036	-0.453167	0.650428	NA
hsa-miR-376a-3p	460.916	0.228692	0.214122	1.06804	0.285501	0.759727
hsa-miR-5591-3p	2.67677	0.324454	0.403678	0.803745	0.421545	NA
hsa-miR-4720-5p	3.66598	-0.717172	0.408401	-1.75605	0.0790804	NA
hsa-miR-6514-5p	15.0652	0.257798	0.277558	0.928806	0.35299	0.80847
hsa-miR-7157-3p	6.26802	0.367175	0.371507	0.98834	0.322986	0.794298
hsa-miR-7156-5p	11.4603	0.354519	0.291826	1.21483	0.224431	0.694636
hsa-miR-7154-5p	1.36691	0.820068	0.41895	1.95744	0.0502961	NA
hsa-miR-224-3p	0.454314	-0.280356	0.356577	-0.786241	0.431726	NA
hsa-miR-221-5p	5226.75	-0.391574	0.202412	-1.93454	0.0530469	0.352822
hsa-miR-26b-3p	59.9512	-0.197543	0.193384	-1.0215	0.307016	0.778936
hsa-miR-345-3p	3.98993	-0.855009	0.398066	-2.14791	0.0317209	NA
hsa-miR-6768-3p	2.34286	-0.143654	0.411069	-0.349465	0.726741	NA
hsa-miR-4514	1.05685	-0.103266	0.415188	-0.24872	0.803577	NA
hsa-miR-6499-5p	38.2609	-0.297885	0.241897	-1.23145	0.218153	0.694636
hsa-miR-6749-3p	59.0972	-0.290069	0.206849	-1.40232	0.160819	0.622211
hsa-miR-4797-5p	8.69576	0.0521295	0.323046	0.161369	0.871803	0.987863
hsa-miR-6814-3p	8.16051	-0.256659	0.357	-0.718934	0.472182	0.87722
hsa-miR-4728-3p	5.11296	-0.179104	0.373858	-0.479069	0.631889	NA
hsa-miR-3127-5p	7.02269	0.00865303	0.325005	0.0266243	0.978759	0.99391
hsa-miR-4793-5p	3.33203	0.297531	0.416479	0.714397	0.474982	NA
hsa-miR-1323	1.30093	0.132356	0.423677	0.312399	0.754738	NA
hsa-miR-3690	9.72461	0.258323	0.364557	0.708593	0.478577	0.87729
hsa-miR-122-3p	0.0668261	0.109548	0.196909	0.556336	0.577981	NA
hsa-miR-7159-3p	0.792654	-0.353312	0.412974	-0.85553	0.392258	NA
hsa-miR-5001-5p	3.12587	0.795614	0.407412	1.95285	0.0508378	NA
hsa-miR-1265	8.03658	0.0979853	0.408173	0.240058	0.810285	0.979612
hsa-miR-300	1.78213	0.299186	0.42416	0.705361	0.480586	NA
hsa-miR-3184-5p	2060.34	-0.315159	0.171475	-1.83792	0.0660735	0.407823
hsa-miR-6757-5p	3.80995	-0.353184	0.405908	-0.870108	0.384241	NA
hsa-miR-4802-5p	9.63582	0.134337	0.337821	0.397659	0.690881	0.936734
hsa-miR-101-5p	283.298	0.106671	0.209247	0.509788	0.6102	0.91663
hsa-miR-6882-5p	21.1729	-0.0158065	0.251	-0.0629741	0.949787	0.99391
hsa-miR-197-3p	7177.06	-0.000922906	0.188199	-0.00490388	0.996087	0.997386
hsa-miR-876-3p	124.134	-0.342471	0.19108	-1.79229	0.0730867	0.428477
hsa-miR-590-5p	10.5978	-0.0573605	0.304441	-0.188413	0.850553	0.985837
hsa-miR-5009-5p	12.5516	-1.5268	0.32787	-4.65673	3.21264e-06	0.000352472
hsa-miR-6727-3p	45.5272	-0.0280976	0.276717	-0.101539	0.919122	0.989997
hsa-miR-619-5p	126.212	-0.21768	0.357265	-0.609297	0.542328	0.891834
hsa-miR-511-3p	3.91834	-0.148683	0.380925	-0.390319	0.6963	NA
hsa-miR-6739-5p	4.33293	0.242313	0.39195	0.618224	0.536428	NA
hsa-miR-181a-3p	3292.12	-0.151338	0.181242	-0.835005	0.403715	0.837982
hsa-miR-557	1.05089	0.104051	0.398084	0.261379	0.7938	NA
hsa-miR-3175	19.7884	-0.0577842	0.286298	-0.201832	0.840048	0.984262
hsa-miR-15b-5p	474.512	-0.127442	0.239623	-0.531846	0.594833	0.902829
hsa-miR-5585-3p	42.4331	-0.134323	0.343951	-0.39053	0.696145	0.937374
hsa-miR-4677-5p	4.16591	0.0488003	0.387998	0.125775	0.89991	NA
hsa-miR-6754-5p	8.20988	-0.012728	0.41714	-0.0305124	0.975658	0.99391
hsa-miR-548ah-5p	10.1796	-0.0696646	0.296086	-0.235285	0.813988	0.979612
hsa-miR-8084	44.9752	-0.426528	0.341424	-1.24926	0.211569	0.686004
hsa-miR-6769b-5p	1.87784	-0.0922524	0.423521	-0.217822	0.827568	NA
hsa-miR-4704-5p	1.09213	0.0519766	0.414892	0.125277	0.900304	NA
hsa-miR-6074	6.14712	0.139815	0.367708	0.380234	0.703771	0.940237
hsa-miR-4499	1.54452	-0.504917	0.424199	-1.19028	0.233935	NA
hsa-miR-4426	2.56083	0.291168	0.418568	0.695629	0.486661	NA
hsa-miR-489-3p	52.9433	0.310875	0.31114	0.999149	0.317722	0.788403
hsa-miR-662	0.712339	-0.218961	0.379262	-0.577335	0.563713	NA
hsa-miR-3182	37.0496	0.0426913	0.278014	0.153558	0.877958	0.988534
hsa-miR-941	3316.18	-0.0967803	0.204563	-0.473107	0.636137	0.91663
hsa-miR-4254	15.8743	-0.0728503	0.290303	-0.250946	0.801856	0.977595
hsa-miR-524-3p	9.28293	-0.713755	0.319605	-2.23324	0.0255328	0.239933
hsa-miR-200c-5p	0	NA	NA	NA	NA	NA
hsa-miR-147a	0.733615	0.157596	0.398285	0.395686	0.692337	NA
hsa-miR-4733-5p	7.99425	-0.184706	0.320348	-0.57658	0.564223	0.894054
hsa-miR-4485-3p	1134.61	0.120125	0.341521	0.351734	0.725038	0.951704
hsa-miR-4261	1.64326	0.329555	0.424372	0.77657	0.437412	NA
hsa-miR-4270	2.39141	0.258499	0.412262	0.627026	0.530642	NA
hsa-miR-6809-3p	3.95471	0.31983	0.405376	0.788971	0.430129	NA
hsa-miR-1302	12.9566	-0.339255	0.338616	-1.00189	0.316398	0.787661
hsa-miR-7112-5p	3.94592	0.0236954	0.38763	0.0611289	0.951257	NA
hsa-miR-1246	3278.39	0.219216	0.414976	0.528262	0.597318	0.904603
hsa-miR-20b-3p	1.69813	-0.0785809	0.420099	-0.187053	0.851619	NA
hsa-miR-4736	1.55782	-0.178435	0.421954	-0.422877	0.672385	NA
hsa-miR-6715b-5p	40.7002	0.0285537	0.28339	0.100757	0.919743	0.989997
hsa-miR-450a-1-3p	0.358675	-0.105244	0.317202	-0.331789	0.740048	NA
hsa-miR-4538	3.25666	-0.123376	0.422875	-0.291755	0.770474	NA
hsa-miR-5093	0.572825	0.141344	0.393842	0.358886	0.719681	NA
hsa-miR-3934-5p	18.177	0.0277668	0.28576	0.0971682	0.922593	0.99117
hsa-miR-376b-3p	60.2535	0.123157	0.256001	0.481079	0.63046	0.91663
hsa-miR-7705	7.82382	0.361565	0.330797	1.09301	0.274389	0.743319
hsa-miR-302d-3p	10.4453	1.48898	0.417612	3.56545	0.000363229	0.0131674
hsa-miR-4999-5p	10.9725	-0.0497932	0.354077	-0.140628	0.888163	0.988534
hsa-miR-4745-3p	154.913	0.579691	0.296274	1.9566	0.0503942	0.344274
hsa-miR-5589-5p	1.39894	-0.696371	0.425131	-1.63802	0.101418	NA
hsa-miR-670-3p	69.4018	0.0584984	0.23675	0.247089	0.804839	0.977595
hsa-miR-4649-3p	5.88593	0.520457	0.37981	1.37031	0.170591	0.639091
hsa-miR-4479	20.8054	0.415738	0.306299	1.35729	0.174688	0.644931
hsa-miR-3160-5p	3.81904	-0.24729	0.381222	-0.648678	0.516546	NA
hsa-miR-4420	12.3369	0.502326	0.42244	1.18911	0.234398	0.705951
hsa-miR-3622a-3p	2.9659	-0.330238	0.398426	-0.828856	0.407186	NA
hsa-miR-877-5p	317.682	-0.118908	0.141601	-0.839743	0.401052	0.835444
hsa-miR-4442	48.6076	0.984579	0.287027	3.43026	0.000602994	0.0175009
hsa-miR-5195-3p	7.86632	0.439177	0.325446	1.34946	0.177188	0.644931
hsa-miR-215-3p	1.41103	0.341631	0.424185	0.805382	0.4206	NA
hsa-miR-590-3p	189.81	-0.194146	0.243455	-0.797463	0.425182	0.843772
hsa-miR-4690-3p	3.89418	0.0222333	0.376015	0.0591287	0.95285	NA
hsa-miR-6847-5p	8.10775	-0.120226	0.320253	-0.375409	0.707356	0.940692
hsa-miR-7975	251.225	-0.60866	0.396326	-1.53576	0.124598	0.555205
hsa-miR-140-5p	710.029	-0.432749	0.194061	-2.22996	0.0257499	0.239933
hsa-miR-134-5p	3063.66	0.314451	0.200774	1.5662	0.117302	0.545774
hsa-miR-3685	5.98224	0.0508904	0.366987	0.138671	0.88971	0.988534
hsa-miR-6786-3p	12.6193	0.0572389	0.268961	0.212815	0.831471	0.981554
hsa-miR-3166	0.837433	0.100301	0.413274	0.242699	0.808239	NA
hsa-miR-3667-5p	1.06195	0.0280391	0.413468	0.0678143	0.945933	NA
hsa-miR-539-3p	2116.47	-0.182609	0.16502	-1.10659	0.268473	0.741681
hsa-miR-432-5p	1264.02	0.201124	0.192549	1.04454	0.296238	0.772347
hsa-miR-374b-5p	841.689	0.288267	0.22837	1.26228	0.206848	0.684131
hsa-miR-487b-3p	7192.62	0.0461944	0.136792	0.337697	0.735592	0.954281
hsa-miR-8056	1.02225	0.311322	0.421177	0.739171	0.459803	NA
hsa-miR-572	11.8661	0.4381	0.359341	1.21918	0.222777	0.694636
hsa-miR-5186	9.90555	-1.33832	0.366636	-3.65028	0.000261958	0.0103171
hsa-miR-4506	8.96696	-1.31137	0.339501	-3.86264	0.000112169	0.00585374
hsa-miR-218-2-3p	19.3117	0.571605	0.267927	2.13344	0.0328891	0.279103
hsa-miR-488-5p	1076.23	-0.571571	0.207804	-2.75054	0.00594978	0.0878736
hsa-miR-5189-3p	7.8439	0.48364	0.377363	1.28163	0.199972	0.678051
hsa-miR-105-3p	36.9089	0.346486	0.228802	1.51435	0.129938	0.563798
hsa-miR-1257	1.43522	0.172364	0.423466	0.407031	0.683985	NA
hsa-miR-4671-5p	6.93648	0.0136782	0.341199	0.0400886	0.968023	0.99391
hsa-miR-18a-3p	7.41355	0.129607	0.323595	0.400522	0.688772	0.93544
hsa-miR-4535	7.03002	-0.0998283	0.420099	-0.23763	0.812168	0.979612
hsa-miR-23b-3p	13625.4	-0.105946	0.181067	-0.585118	0.558468	0.894054
hsa-miR-624-5p	10.0467	-0.417737	0.287427	-1.45337	0.146121	0.588483
hsa-miR-6853-5p	1.63227	-0.523337	0.417258	-1.25423	0.209758	NA
hsa-miR-548q	41.6743	-0.0815092	0.335085	-0.243249	0.807812	0.979612
hsa-miR-4496	48.2607	0.699323	0.227043	3.08013	0.00206907	0.040229
hsa-miR-8079	15.9918	0.349314	0.408859	0.854364	0.392903	0.833919
hsa-miR-4278	5.62235	0.239543	0.35273	0.679111	0.497068	0.878707
hsa-miR-4529-5p	24.3991	0.718407	0.258141	2.783	0.00538595	0.0819091
hsa-miR-5705	24.4658	-0.752874	0.264969	-2.84136	0.00449213	0.0699759
hsa-miR-4322	2.51528	-0.190115	0.405395	-0.468962	0.639097	NA
hsa-miR-3648	6.60848	0.218167	0.354204	0.615936	0.537937	0.889419
hsa-miR-95-5p	133.564	0.016104	0.194964	0.0825998	0.93417	0.99391
hsa-miR-4287	0.519257	0.343972	0.371779	0.925207	0.354858	NA
hsa-miR-299-3p	484.409	-0.0207934	0.208447	-0.0997541	0.92054	0.99016
hsa-miR-4759	1.8918	0.17479	0.420302	0.415867	0.677507	NA
hsa-miR-6836-5p	4.9656	0.0279706	0.40072	0.0698007	0.944352	NA
hsa-miR-30a-3p	1947.4	0.0557799	0.194324	0.287046	0.774077	0.966461
hsa-miR-521	19.5962	-1.36341	0.326079	-4.18123	2.8994e-05	0.00222674
hsa-miR-6842-3p	297.3	-0.0447969	0.198431	-0.225756	0.821391	0.979612
hsa-miR-4493	1.27673	0.0431095	0.421898	0.10218	0.918614	NA
hsa-miR-1273d	5.68036	0.0911585	0.400241	0.227759	0.819834	0.979612
hsa-miR-513b-3p	0.829768	-0.1334	0.402577	-0.331366	0.740368	NA
hsa-miR-4713-3p	3.32786	0.20525	0.412222	0.497912	0.618546	NA
hsa-miR-4674	3.28673	0.00442322	0.406663	0.0108769	0.991322	NA
hsa-miR-3646	0.904932	-0.329351	0.418415	-0.787139	0.431201	NA
hsa-miR-1282	4.33669	-0.28723	0.399721	-0.718576	0.472402	NA
hsa-miR-133b	1.21337	-0.168047	0.421673	-0.398525	0.690243	NA
hsa-miR-1269a	15.3452	0.870929	0.418239	2.08237	0.0373084	0.293875
hsa-miR-3193	1.53915	0.0988824	0.424978	0.232677	0.816012	NA
hsa-miR-1288-3p	3.81773	-0.370211	0.379088	-0.976583	0.328776	NA
hsa-miR-1973	145.577	-0.51954	0.353097	-1.47138	0.141188	0.58259
hsa-miR-4680-5p	3.06858	-0.0729616	0.398473	-0.183103	0.854717	NA
hsa-miR-6084	5.5044	0.748857	0.387122	1.93442	0.0530611	0.352822
hsa-miR-6745	4.19638	-0.411988	0.37753	-1.09127	0.275153	NA
hsa-miR-6733-5p	19.0234	-0.168145	0.288164	-0.583504	0.559554	0.894054
hsa-miR-548c-3p	8.83525	-0.00989149	0.33406	-0.0296099	0.976378	0.99391
hsa-miR-1286	88.1851	0.349257	0.216838	1.61068	0.107249	0.522968
hsa-miR-4641	4.89809	-0.0290818	0.399306	-0.0728309	0.941941	NA
hsa-miR-3654	8.7588	-0.0772933	0.368345	-0.20984	0.833793	0.982136
hsa-miR-8069	42.6784	0.131429	0.405653	0.323994	0.745943	0.956135
hsa-miR-6889-3p	8.71268	0.352077	0.338714	1.03945	0.298596	0.772347
hsa-miR-433-5p	127.562	0.144847	0.16955	0.854299	0.39294	0.833919
hsa-miR-8089	4.13427	0.244091	0.392703	0.621566	0.534227	NA
hsa-miR-1228-5p	30.1519	-0.196822	0.34542	-0.569805	0.56881	0.897937
hsa-miR-6792-5p	1.69906	0.27044	0.419033	0.645392	0.518673	NA
hsa-miR-4662a-3p	1.07981	-0.415119	0.42124	-0.985469	0.324394	NA
hsa-miR-298	0.756876	-0.100771	0.410838	-0.245281	0.806239	NA
hsa-miR-6806-3p	4.43179	-0.229322	0.384486	-0.596439	0.550882	NA
hsa-miR-1909-3p	41.0707	0.478071	0.350456	1.36414	0.172523	0.644758
hsa-miR-4748	1.98717	-0.0627164	0.42067	-0.149087	0.881485	NA
hsa-miR-541-5p	32.4434	-0.36833	0.248188	-1.48407	0.137789	0.578638
hsa-miR-190a-5p	1783.82	-0.425236	0.222719	-1.90929	0.0562244	0.364391
hsa-miR-6884-3p	3.15667	0.0891172	0.393105	0.226701	0.820656	NA
hsa-miR-3680-5p	4.32737	0.717088	0.382392	1.87527	0.0607556	NA
hsa-miR-154-5p	619.692	0.464318	0.267162	1.73796	0.0822175	0.446913
hsa-miR-6892-3p	12.0936	-0.105974	0.363848	-0.291259	0.770853	0.96498
hsa-miR-758-3p	843.368	-0.00265805	0.161428	-0.0164659	0.986863	0.994965
hsa-miR-3655	16.1145	-0.0665318	0.299667	-0.222019	0.824299	0.979612
hsa-miR-6857-3p	4.50517	-0.111882	0.365944	-0.305734	0.759807	NA
hsa-miR-4637	0.802998	-0.331174	0.407241	-0.813214	0.416096	NA
hsa-miR-4435	3.26714	0.441871	0.395002	1.11865	0.263288	NA
hsa-miR-576-3p	39.1764	-0.0553364	0.2518	-0.219764	0.826055	0.979784
hsa-miR-6784-5p	1337.42	-0.33193	0.306699	-1.08227	0.279135	0.748256
hsa-miR-6817-5p	2.55023	0.262781	0.408846	0.642738	0.520394	NA
hsa-miR-4665-5p	64.6986	0.4432	0.286748	1.54561	0.1222	0.551177
hsa-miR-122-5p	15.1901	-0.270785	0.277495	-0.975819	0.329154	0.794298
hsa-miR-205-3p	1.29698	-0.330727	0.422946	-0.781961	0.434237	NA
hsa-miR-568	1.05527	-0.204401	0.420037	-0.486625	0.626524	NA
hsa-miR-4503	6.71402	-0.0148695	0.351147	-0.0423455	0.966223	0.99391
hsa-miR-2277-5p	152.181	-0.584473	0.173544	-3.36787	0.000757517	0.0197211
hsa-miR-604	36.1286	0.203437	0.294345	0.691152	0.48947	0.878707
hsa-miR-5088-3p	5.05129	-0.176131	0.356178	-0.494504	0.62095	NA
hsa-miR-664a-5p	74.5689	-0.134828	0.198884	-0.677922	0.497821	0.878707
hsa-let-7a-5p	307527	-0.196626	0.191596	-1.02625	0.304772	0.778919
hsa-miR-26a-5p	743450	-0.0986438	0.157765	-0.625257	0.531802	0.886074
hsa-miR-424-5p	118.279	0.174368	0.235779	0.739537	0.459581	0.874378
hsa-miR-4741	6.8011	0.431916	0.373993	1.15488	0.24814	0.721861
hsa-miR-3976	0.827354	-0.276645	0.407761	-0.678448	0.497487	NA
hsa-miR-451b	336.87	-2.59172	0.310089	-8.35798	6.38033e-17	9.80019e-14
hsa-miR-3529-3p	6514.33	-0.116666	0.250798	-0.465179	0.641803	0.917032
hsa-miR-486-3p	32538.3	-0.021447	0.281131	-0.0762881	0.93919	0.99391
hsa-miR-4517	2.15007	-0.369171	0.418582	-0.881957	0.3778	NA
hsa-miR-508-3p	23.252	-0.380946	0.315317	-1.20814	0.226994	0.695934
hsa-miR-3942-5p	7.42491	-0.39409	0.374205	-1.05314	0.292278	0.766863
hsa-miR-6766-3p	6.19542	0.377022	0.349437	1.07894	0.280614	0.750911
hsa-miR-3974	0.937635	0.139499	0.421569	0.330904	0.740717	NA
hsa-miR-1250-3p	7.96301	-0.0481961	0.398281	-0.12101	0.903683	0.988534
hsa-miR-22-5p	253.208	0.244864	0.209335	1.16972	0.242112	0.713788
hsa-miR-6511b-5p	29.2623	0.136484	0.249826	0.546317	0.584848	0.900127
hsa-let-7b-3p	7.72434	-1.34955	0.327468	-4.12116	3.76975e-05	0.00260313
hsa-miR-3918	5.68011	0.714522	0.393183	1.81728	0.069175	0.416677
hsa-miR-6835-5p	80.6301	-0.0762466	0.314771	-0.242229	0.808603	0.979612
hsa-miR-185-3p	0.272075	0.533289	0.329801	1.617	0.105878	NA
hsa-miR-7153-3p	1.65613	-0.603025	0.422128	-1.42854	0.153138	NA
hsa-miR-378e	57.1841	0.510243	0.218542	2.33475	0.0195563	0.202962
hsa-miR-10a-5p	442.258	0.157708	0.374551	0.421059	0.673712	0.929759
hsa-miR-6867-5p	2.35975	0.342327	0.418871	0.817262	0.413779	NA
hsa-miR-324-3p	475.297	0.287763	0.194907	1.47642	0.139832	0.581363
hsa-miR-34b-3p	10.1501	-0.0697016	0.329882	-0.211292	0.832659	0.981554
hsa-miR-6855-5p	3.84452	-0.512498	0.386459	-1.32614	0.184794	NA
hsa-miR-4697-3p	2.1004	0.384136	0.412758	0.930655	0.352032	NA
hsa-miR-1202	1.2503	-0.109378	0.421787	-0.25932	0.795388	NA
hsa-miR-4449	21.7672	0.00989335	0.28921	0.0342082	0.972711	0.99391
hsa-miR-3713	4.53128	-0.337465	0.376745	-0.895739	0.370392	NA
hsa-miR-3915	0.768476	-0.0609701	0.406596	-0.149952	0.880802	NA
hsa-miR-3127-3p	10.5893	0.654957	0.334808	1.95622	0.0504395	0.344274
hsa-miR-320b	11.6357	0.136837	0.320324	0.427182	0.669247	0.926883
hsa-miR-92a-1-5p	6.21405	-0.247209	0.371606	-0.665245	0.505894	0.879255
hsa-miR-15a-3p	1.80513	0.425401	0.417861	1.01804	0.308657	NA
hsa-miR-4446-5p	2.89603	0.203777	0.401013	0.508156	0.611344	NA
hsa-miR-559	1.68391	0.383317	0.419816	0.913061	0.361211	NA
hsa-miR-6844	399.362	-0.917446	0.273849	-3.35019	0.00080757	0.0206738
hsa-miR-4482-5p	3.66608	0.661404	0.416709	1.58721	0.112466	NA
hsa-miR-520f-5p	5.56039	-0.104129	0.371865	-0.280018	0.779464	0.969438
hsa-miR-3614-5p	18.6698	0.642918	0.387525	1.65904	0.0971084	0.492272
hsa-miR-4790-5p	32.8165	0.164255	0.278311	0.590186	0.555066	0.894054
hsa-miR-4746-5p	18.3431	0.0362389	0.291393	0.124364	0.901027	0.988534
hsa-miR-6874-3p	3.94627	0.3557	0.379633	0.936957	0.348781	NA
hsa-miR-6779-5p	4.83559	-0.405566	0.400829	-1.01182	0.311625	NA
hsa-miR-548ax	3.05562	0.068817	0.398689	0.172608	0.862959	NA
hsa-miR-1910-5p	22.7325	0.381559	0.282364	1.3513	0.176599	0.644931
hsa-miR-628-3p	716.139	0.132536	0.179623	0.737859	0.4606	0.874514
hsa-miR-5682	19.363	0.345575	0.28255	1.22306	0.221307	0.694636
hsa-miR-3156-5p	35.6713	-0.0691095	0.37046	-0.186551	0.852013	0.985837
hsa-miR-8072	3.00199	0.00169015	0.405231	0.00417084	0.996672	NA
hsa-miR-615-5p	5.49704	0.0405677	0.364128	0.111411	0.911291	0.988534
hsa-miR-507	1.27677	-0.589036	0.424497	-1.38761	0.165256	NA
hsa-miR-548h-5p	10.385	-0.234177	0.329632	-0.710419	0.477445	0.87729
hsa-miR-365b-5p	7.88173	0.103768	0.334168	0.310525	0.756162	0.958748
hsa-miR-4693-3p	184.946	-0.148082	0.330309	-0.448315	0.653926	0.922889
hsa-miR-3065-3p	3101.81	-0.517774	0.243253	-2.12854	0.0332921	0.280971
hsa-miR-4708-5p	1.94364	0.453224	0.414384	1.09373	0.274074	NA
hsa-miR-6762-5p	12.4448	-0.456913	0.288577	-1.58333	0.113346	0.542368
hsa-miR-6752-3p	16.4679	-0.269099	0.417176	-0.645049	0.518895	0.879255
hsa-miR-18a-5p	118.891	0.148218	0.26859	0.551837	0.58106	0.900127
hsa-miR-199a-3p	379.708	-0.0871382	0.202326	-0.430682	0.666699	0.925073
hsa-miR-4764-5p	21.4432	0.0510868	0.321423	0.15894	0.873717	0.987863
hsa-miR-421	1369.85	-0.00818303	0.204578	-0.0399995	0.968094	0.99391
hsa-miR-7106-5p	41.6941	0.127972	0.424809	0.301246	0.763227	0.959906
hsa-miR-337-5p	53.4441	0.227104	0.226632	1.00208	0.316303	0.787661
hsa-miR-506-3p	16.868	-0.404272	0.330688	-1.22252	0.221512	0.694636
hsa-miR-4711-3p	7.68326	0.846362	0.382411	2.21323	0.026882	0.241466
hsa-miR-5007-3p	7.16125	0.0908014	0.383005	0.237077	0.812597	0.979612
hsa-miR-4659b-3p	5.18362	0.211701	0.387117	0.546866	0.584471	NA
hsa-miR-1305	8.98086	-0.0148659	0.333746	-0.0445424	0.964472	0.99391
hsa-miR-4655-5p	4.58621	0.450101	0.385486	1.16762	0.242959	NA
hsa-miR-631	1.34743	0.0352661	0.423988	0.0831771	0.933711	NA
hsa-miR-4267	21.3038	0.269202	0.287721	0.935634	0.349462	0.80847
hsa-miR-5010-5p	18.1971	-0.259414	0.256713	-1.01052	0.312247	0.783525
hsa-miR-219b-3p	3995.11	-0.102998	0.31925	-0.322624	0.74698	0.956135
hsa-miR-7976	12.9254	-0.605792	0.286082	-2.11754	0.0342137	0.287171
hsa-miR-6506-5p	2.45247	0.0477844	0.424485	0.11257	0.910371	NA
hsa-miR-7158-5p	10.1311	-0.292255	0.331967	-0.880375	0.378656	0.833919
hsa-miR-129-1-3p	994.523	-0.704799	0.268972	-2.62035	0.00878407	0.118354
hsa-miR-6853-3p	28.9599	-0.183554	0.25732	-0.713331	0.475641	0.87729
hsa-miR-5591-5p	0.618188	0.228511	0.402359	0.567928	0.570084	NA
hsa-miR-6736-3p	88.1672	0.984063	0.286825	3.43088	0.000601632	0.0175009
hsa-miR-3191-3p	2.90951	0.344394	0.425079	0.810187	0.417833	NA
hsa-miR-6762-3p	41.8816	0.214397	0.223803	0.957973	0.338077	0.800132
hsa-miR-1915-3p	45.1702	0.15775	0.426049	0.370262	0.711187	0.943026
hsa-miR-6131	183423	0.181946	0.283431	0.641939	0.520913	0.879255
hsa-miR-8059	3.30175	-0.92187	0.399449	-2.30785	0.0210073	NA
hsa-miR-4768-3p	4.4114	-0.252167	0.405357	-0.622086	0.533885	NA
hsa-miR-8052	0.238125	-0.0666728	0.276878	-0.240802	0.809709	NA
hsa-miR-4305	0.519899	-0.134839	0.384759	-0.350449	0.726002	NA
hsa-miR-4697-5p	2.48953	0.19336	0.40871	0.473099	0.636143	NA
hsa-miR-7153-5p	9.35992	0.0195015	0.397327	0.0490818	0.960854	0.99391
hsa-miR-3189-5p	1.63058	0.0578702	0.422983	0.136814	0.891178	NA
hsa-miR-6743-3p	10.2179	0.776892	0.334499	2.32255	0.0202031	0.20688
hsa-miR-373-3p	8.63752	1.94295	0.419482	4.63178	3.6253e-06	0.000371231
hsa-miR-585-3p	44.4002	-0.360499	0.316819	-1.13787	0.255174	0.733984
hsa-miR-6848-3p	10.1834	0.560577	0.314534	1.78225	0.0747092	0.435757
hsa-miR-130a-3p	2810.29	0.102875	0.190853	0.539028	0.589868	0.9008
hsa-miR-2355-5p	90.5162	-0.218467	0.227249	-0.961355	0.336374	0.79854
hsa-miR-4427	1.72645	0.236669	0.424373	0.557692	0.577055	NA
hsa-miR-6070	24.1268	0.629487	0.36173	1.74021	0.0818218	0.446913
hsa-miR-4760-5p	7.4268	-0.0900015	0.351721	-0.255889	0.798037	0.977595
hsa-miR-652-5p	55.8486	-0.403691	0.261803	-1.54197	0.123082	0.551177
hsa-miR-3677-5p	2.24061	-0.189072	0.422926	-0.447056	0.654834	NA
hsa-miR-4709-3p	1.45735	-0.424671	0.424045	-1.00147	0.316597	NA
hsa-miR-655-3p	210.252	0.67726	0.249898	2.71014	0.00672547	0.0965451
hsa-miR-7702	1.76595	-0.0165311	0.421079	-0.039259	0.968684	NA
hsa-miR-887-5p	114.387	-0.534359	0.169245	-3.15731	0.00159232	0.0330514
hsa-miR-3195	105.276	-0.141463	0.25577	-0.553087	0.580204	0.900127
hsa-miR-6823-5p	3.65229	0.359078	0.400847	0.895799	0.37036	NA
hsa-miR-1245b-3p	4.48206	0.481376	0.425476	1.13138	0.257895	NA
hsa-miR-16-1-3p	7.15317	-0.586573	0.337236	-1.73936	0.0819722	0.446913
hsa-miR-1203	5.39287	0.354734	0.367608	0.964979	0.334555	0.797183
hsa-miR-6819-3p	164.691	0.257987	0.23739	1.08676	0.277142	0.746213
hsa-miR-762	13.2392	-0.00923562	0.333191	-0.0277187	0.977887	0.99391
hsa-miR-363-3p	2131.44	-0.354016	0.196804	-1.79883	0.0720452	0.428477
hsa-miR-1295a	24.0717	0.697341	0.324757	2.14727	0.0317716	0.274164
hsa-miR-205-5p	8.90487	0.218933	0.314517	0.696093	0.48637	0.878707
hsa-miR-6887-5p	9.77408	0.0419266	0.32425	0.129304	0.897117	0.988534
hsa-miR-7160-3p	9.3268	0.623429	0.36572	1.70466	0.088258	0.45954
hsa-miR-4633-3p	7.26458	0.308274	0.354525	0.869542	0.384551	0.833919
hsa-miR-4463	28.452	-0.48872	0.363124	-1.34588	0.178343	0.647599
hsa-miR-3914	33.5537	0.255647	0.247491	1.03296	0.301624	0.776039
hsa-miR-3180-5p	20.372	0.398415	0.287854	1.38409	0.166331	0.630825
hsa-miR-5004-5p	8.59833	-0.330785	0.382216	-0.865439	0.386798	0.833919
hsa-miR-6843-3p	15.2819	0.314126	0.25411	1.23618	0.216391	0.691011
hsa-miR-623	0	NA	NA	NA	NA	NA
hsa-miR-6868-3p	58.9619	-0.630488	0.362447	-1.73953	0.0819413	0.446913
hsa-miR-6830-5p	31.2525	1.01341	0.425058	2.38416	0.0171181	0.18781
hsa-miR-4725-5p	0.770313	0.0653988	0.398552	0.164091	0.86966	NA
hsa-miR-4744	2.94493	0.286923	0.405797	0.70706	0.479529	NA
hsa-miR-1253	2.28626	-0.108888	0.414923	-0.26243	0.79299	NA
hsa-miR-515-5p	14.9202	0.245003	0.340797	0.718913	0.472194	0.87722
hsa-miR-4453	1.04834	0.465468	0.418766	1.11152	0.266343	NA
hsa-miR-302e	0.187334	0.0628125	0.265482	0.236598	0.812969	NA
hsa-miR-4256	4.68459	0.167635	0.393738	0.425753	0.670288	NA
hsa-miR-7848-3p	9.22418	-0.109863	0.348242	-0.31548	0.752397	0.958748
hsa-miR-30c-1-3p	144.943	-0.267772	0.191359	-1.39932	0.161718	0.623363
hsa-miR-4731-5p	27.5561	-0.395498	0.252634	-1.5655	0.117465	0.545774
hsa-miR-676-3p	13.4827	-0.0425795	0.302121	-0.140935	0.887921	0.988534
hsa-miR-7150	2.77125	-0.346799	0.416903	-0.831847	0.405495	NA
hsa-miR-6786-5p	5.80102	-0.179155	0.376645	-0.475659	0.634318	0.91663
hsa-miR-920	3.84398	-0.105445	0.423376	-0.249057	0.803317	NA
hsa-miR-1264	154.131	-0.310012	0.249741	-1.24133	0.214484	0.690608
hsa-miR-6500-3p	33.7718	-0.331186	0.245315	-1.35004	0.177002	0.644931
hsa-miR-4653-3p	1.16537	0.441964	0.422873	1.04515	0.295956	NA
hsa-miR-1273h-3p	79.2104	0.0583792	0.188358	0.309938	0.756608	0.958748
hsa-miR-6780a-3p	9.70883	-0.617344	0.307103	-2.01022	0.0444084	0.32637
hsa-miR-4790-3p	2.24119	-0.379319	0.412534	-0.919485	0.357842	NA
hsa-miR-513c-5p	3.52253	-0.305817	0.388999	-0.786165	0.431771	NA
hsa-miR-6878-5p	2.67567	-0.0325914	0.407832	-0.0799138	0.936306	NA
hsa-miR-6759-5p	1.41696	0.368251	0.423151	0.87026	0.384159	NA
hsa-miR-4536-5p	3.8658	0.244917	0.395076	0.619925	0.535307	NA
hsa-miR-130a-5p	0.898561	-0.376054	0.419019	-0.897465	0.369471	NA
hsa-miR-6771-3p	91.6584	0.330568	0.279339	1.18339	0.236654	0.707199
hsa-miR-6512-5p	7.23166	-0.534951	0.329463	-1.6237	0.104439	0.51252
hsa-miR-4258	47.1885	0.554484	0.287948	1.92564	0.0541491	0.35544
hsa-miR-562	3.24602	-0.187111	0.397952	-0.470185	0.638223	NA
hsa-miR-133a-5p	6.93735	-0.601024	0.378355	-1.58852	0.112169	0.538939
hsa-miR-3156-3p	10.2614	0.223525	0.345942	0.646134	0.518192	0.879255
hsa-miR-34a-3p	27.7885	-0.168557	0.282871	-0.595879	0.551256	0.894054
hsa-miR-1231	11.1285	-0.0812505	0.328567	-0.247287	0.804686	0.977595
hsa-miR-548as-3p	18.3604	0.211905	0.310897	0.681593	0.495496	0.878707
hsa-miR-4692	2.24255	0.0312875	0.412108	0.0759206	0.939482	NA
hsa-miR-504-3p	8.9752	0.113369	0.335413	0.337997	0.735365	0.954281
hsa-miR-215-5p	59.3382	-0.0494589	0.276546	-0.178845	0.858059	0.986338
hsa-miR-10a-3p	0.0211489	0.0408698	0.193299	0.211434	0.832549	NA
hsa-miR-4468	3.20551	-0.0581466	0.413213	-0.140718	0.888093	NA
hsa-miR-3165	2.13401	-0.0598197	0.419145	-0.142718	0.886513	NA
hsa-miR-3606-3p	3.45288	0.00932152	0.400352	0.0232833	0.981424	NA
hsa-miR-582-3p	1849.44	0.233537	0.150752	1.54915	0.121347	0.551177
hsa-miR-4719	0.856223	0.236494	0.416371	0.567989	0.570042	NA
hsa-miR-4749-5p	825.828	0.103464	0.417376	0.247892	0.804218	0.977595
hsa-miR-384	10.1132	-0.374743	0.367979	-1.01838	0.308496	0.780268
hsa-miR-323b-3p	2247.73	0.172884	0.267015	0.64747	0.517328	0.879255
hsa-miR-4526	2.28785	0.371436	0.411327	0.903018	0.366516	NA
hsa-miR-877-3p	25.3586	0.231554	0.279987	0.827015	0.408228	0.841663
hsa-miR-3159	1945.49	-1.7491	0.296076	-5.90759	3.47154e-09	1.33307e-06
hsa-miR-6723-5p	520.037	-0.335723	0.352058	-0.953601	0.340285	0.800426
hsa-miR-4274	5.49201	0.319775	0.37949	0.842645	0.399427	0.834331
hsa-miR-548g-5p	4.11508	-0.105521	0.368644	-0.28624	0.774694	NA
hsa-miR-635	5.5662	-0.340654	0.39656	-0.859022	0.390328	0.833919
hsa-miR-6127	3.36169	-0.218139	0.411398	-0.53024	0.595946	NA
hsa-miR-5197-5p	7.50607	0.178914	0.384378	0.465463	0.6416	0.917032
hsa-miR-6730-5p	1.84082	0.254111	0.417089	0.609249	0.542359	NA
hsa-miR-4761-3p	2.47739	-0.019887	0.403909	-0.0492362	0.960731	NA
hsa-miR-6800-3p	1.96335	-0.129026	0.413907	-0.311726	0.755249	NA
hsa-miR-4687-3p	14.4319	0.226931	0.291987	0.777195	0.437043	0.851902
hsa-miR-579-3p	7.7881	-0.0867619	0.387206	-0.224072	0.822701	0.979612
hsa-miR-3145-3p	4.58657	0.387671	0.382916	1.01242	0.311339	NA
hsa-miR-593-3p	2.43272	0.284192	0.424563	0.669374	0.503257	NA
hsa-miR-1273g-3p	1756.09	-0.350028	0.285459	-1.22619	0.220126	0.694636
hsa-miR-374c-5p	2.22538	0.387358	0.409781	0.94528	0.344516	NA
hsa-miR-3064-3p	3.55347	-0.0412019	0.405249	-0.10167	0.919018	NA
hsa-miR-4733-3p	4.91073	-0.0923491	0.376022	-0.245595	0.805996	NA
hsa-miR-1250-5p	30.9714	0.190396	0.283503	0.671585	0.501848	0.879255
hsa-miR-632	1.02115	-0.340136	0.420085	-0.809683	0.418123	NA
hsa-miR-6773-5p	8.669	-0.0413789	0.373749	-0.110713	0.911844	0.988534
hsa-miR-142-3p	85.9872	0.132476	0.253569	0.522447	0.601359	0.907355
hsa-miR-302b-5p	4.07496	0.300083	0.41904	0.716121	0.473917	NA
hsa-miR-3200-5p	49.5445	-0.498793	0.221783	-2.24902	0.0245114	0.236789
hsa-miR-490-5p	120.402	0.227615	0.217486	1.04657	0.295297	0.772347
hsa-miR-18b-5p	3.27808	0.13996	0.3844	0.364099	0.715784	NA
hsa-miR-3689d	0.157009	0.263927	0.254128	1.03856	0.29901	NA
hsa-miR-216a-3p	0.847773	-0.238692	0.416422	-0.573197	0.566511	NA
hsa-miR-6790-3p	100.854	-0.0370337	0.223627	-0.165604	0.868468	0.986697
hsa-miR-1343-3p	191.464	-0.148328	0.264272	-0.561271	0.574613	0.898784
hsa-miR-1913	31.5986	0.399265	0.384158	1.03933	0.298653	0.772347
hsa-miR-653-5p	55.2877	0.495316	0.285654	1.73397	0.0829233	0.446913
hsa-miR-4657	0.980274	0.191624	0.418619	0.457754	0.647129	NA
hsa-miR-936	11.8264	0.215773	0.371389	0.580988	0.561249	0.894054
hsa-miR-570-5p	2.61276	-0.684535	0.404596	-1.6919	0.0906654	NA
hsa-miR-302a-5p	3.27859	0.847567	0.413745	2.04852	0.0405089	NA
hsa-miR-338-3p	36923.1	-0.342645	0.30214	-1.13406	0.256769	0.73496
hsa-miR-138-1-3p	2.43954	-0.261158	0.419376	-0.62273	0.533462	NA
hsa-miR-381-5p	33.7532	0.0438413	0.248226	0.176618	0.859808	0.986338
hsa-miR-1322	6.91021	-0.0263415	0.361894	-0.0727877	0.941975	0.99391
hsa-miR-128-2-5p	298.001	-0.865045	0.225733	-3.83216	0.000127023	0.00591233
hsa-miR-6783-5p	2.60916	-0.562856	0.407754	-1.38038	0.167469	NA
hsa-miR-8063	1.48138	-0.0337892	0.425561	-0.0793993	0.936715	NA
hsa-miR-4699-3p	2.93023	-0.156291	0.397261	-0.393422	0.694008	NA
hsa-miR-6882-3p	4.89243	-0.187472	0.357119	-0.524956	0.599613	NA
hsa-miR-487b-5p	70.1635	-0.250628	0.191009	-1.31213	0.189477	0.662127
hsa-miR-548s	5.84524	0.0189586	0.35359	0.0536174	0.95724	0.99391
hsa-miR-3689a-3p	0.14988	0.169561	0.203475	0.833325	0.404661	NA
hsa-miR-2053	2.0229	-0.0371638	0.422834	-0.0878921	0.929962	NA
hsa-miR-449c-5p	4.10808	-0.561075	0.394498	-1.42225	0.154953	NA
hsa-miR-3940-5p	1.8228	0.0837833	0.417904	0.200484	0.841102	NA
hsa-miR-7853-5p	2.94436	-0.0585944	0.425672	-0.137651	0.890516	NA
hsa-miR-24-1-5p	43.7745	-0.218897	0.231596	-0.945168	0.344573	0.806805
hsa-miR-3692-5p	2.85647	-0.0627871	0.409081	-0.153483	0.878017	NA
hsa-miR-7162-5p	4.4383	0.165666	0.381162	0.434633	0.663829	NA
hsa-miR-135b-3p	4.73625	0.148982	0.386606	0.385358	0.699972	NA
hsa-miR-3688-3p	5.00461	0.178358	0.369736	0.482393	0.629526	NA
hsa-miR-4509	0.606909	-0.191233	0.3947	-0.484502	0.62803	NA
hsa-miR-6871-3p	11.5698	0.812955	0.386599	2.10284	0.0354802	0.291152
hsa-miR-4318	2.51062	0.0985461	0.418592	0.235423	0.813881	NA
hsa-miR-1469	80.1769	-0.0620535	0.369255	-0.168051	0.866543	0.986697
hsa-miR-548ae-3p	2.31405	-0.0743171	0.407182	-0.182516	0.855178	NA
hsa-miR-1185-2-3p	6.46179	0.25569	0.353937	0.722416	0.470039	0.87722
hsa-miR-625-3p	222.372	-0.142481	0.212453	-0.670644	0.502447	0.879255
hsa-miR-4640-5p	14.2352	0.491533	0.334591	1.46906	0.141817	0.58259
hsa-miR-4670-3p	5.48584	0.815354	0.420644	1.93835	0.0525809	0.352748
hsa-miR-383-5p	849.739	0.330945	0.208399	1.58803	0.112279	0.538939
hsa-miR-450a-5p	92.1655	-0.0346233	0.266151	-0.130089	0.896496	0.988534
hsa-miR-34a-5p	3254.1	-0.638199	0.291326	-2.19067	0.0284757	0.252825
hsa-miR-1183	2.20311	-0.484459	0.418304	-1.15815	0.246803	NA
hsa-miR-6816-3p	6.85065	-0.00959353	0.349124	-0.0274789	0.978078	0.99391
hsa-miR-548g-3p	0.362667	-0.0415479	0.347	-0.119735	0.904693	NA
hsa-miR-1287-3p	8.07093	0.253473	0.361014	0.702114	0.482608	0.877728
hsa-miR-615-3p	0.742933	0.383863	0.404799	0.948279	0.342988	NA
hsa-miR-585-5p	6.12532	-0.557341	0.374192	-1.48945	0.136368	0.578638
hsa-miR-548v	6.12344	-0.327441	0.330268	-0.991441	0.32147	0.794298
hsa-miR-503-5p	14.1648	0.124378	0.359258	0.346208	0.729187	0.951704
hsa-miR-4330	2.69005	-0.25406	0.411078	-0.618033	0.536554	NA
hsa-miR-502-5p	19.9332	-0.144131	0.254772	-0.565728	0.571579	0.898537
hsa-miR-1307-5p	12682.2	-0.147348	0.175974	-0.837326	0.402409	0.836402
hsa-miR-3120-3p	16.7143	0.114719	0.260084	0.441085	0.659151	0.922889
hsa-miR-518b	2.33982	0.150896	0.417993	0.361001	0.718099	NA
hsa-miR-485-5p	1845.52	-0.11087	0.138689	-0.799413	0.424051	0.843267
hsa-miR-24-2-5p	114.066	-0.0631023	0.189444	-0.333092	0.739065	0.956135
hsa-miR-554	3.48589	0.289206	0.417774	0.692255	0.488778	NA
hsa-miR-144-5p	369.489	0.252186	0.270277	0.933068	0.350785	0.80847
hsa-miR-3922-3p	4.14211	-0.165639	0.402438	-0.411589	0.680641	NA
hsa-miR-3150a-3p	2.69151	0.550817	0.421448	1.30696	0.191225	NA
hsa-miR-3191-5p	8.54138	0.232375	0.324503	0.716096	0.473932	0.87722
hsa-miR-32-3p	23.1405	-0.106438	0.239041	-0.445271	0.656124	0.922889
hsa-miR-6088	2.89291	-0.10298	0.404652	-0.254489	0.799118	NA
hsa-miR-2355-3p	13.4377	-0.165177	0.297017	-0.556119	0.578129	0.900127
hsa-miR-939-5p	5.42873	0.108354	0.351316	0.308423	0.75776	0.958748
hsa-miR-541-3p	42.9848	0.283296	0.257023	1.10222	0.270367	0.742834
hsa-miR-4795-3p	1.02597	0.221175	0.418216	0.528853	0.596907	NA
hsa-miR-4752	3.54917	-0.447958	0.420579	-1.0651	0.286831	NA
hsa-miR-4680-3p	2.941	0.469918	0.397133	1.18328	0.236699	NA
hsa-miR-181d-3p	103.654	0.262099	0.407895	0.642565	0.520506	0.879255
hsa-miR-4783-3p	6.8654	0.751364	0.345046	2.17758	0.0294373	0.259861
hsa-miR-1262	6.30207	-0.158124	0.335823	-0.470856	0.637744	0.91663
hsa-miR-591	4.59376	-0.573586	0.389495	-1.47264	0.140848	NA
hsa-miR-3591-5p	1.00629	0.124714	0.412788	0.302125	0.762557	NA
hsa-miR-4650-3p	1.76312	-0.123946	0.421355	-0.29416	0.768636	NA
hsa-miR-889-3p	4030.12	0.453216	0.210758	2.15041	0.0315232	0.274164
hsa-miR-6747-5p	2.62083	-0.0654484	0.425485	-0.153821	0.877751	NA
hsa-miR-4524b-3p	22.9854	1.28875	0.340251	3.78765	0.00015208	0.00687042
hsa-miR-4687-5p	10.8451	0.262777	0.309683	0.848536	0.39614	0.834331
hsa-miR-1207-5p	1.32308	0.792281	0.420704	1.88323	0.0596695	NA
hsa-miR-659-3p	2.30473	-0.0284349	0.412557	-0.0689236	0.94505	NA
hsa-miR-942-5p	3.38089	-0.487185	0.388298	-1.25467	0.209599	NA
hsa-miR-802	113.443	-0.100944	0.24881	-0.405707	0.684958	0.934365
hsa-miR-526a	0.134278	-0.0386041	0.221405	-0.17436	0.861582	NA
hsa-miR-16-2-3p	136.376	-0.148312	0.229086	-0.64741	0.517366	0.879255
hsa-miR-1915-5p	3.02124	-0.492868	0.404481	-1.21852	0.223026	NA
hsa-miR-548b-5p	9.06582	-0.00209264	0.309219	-0.0067675	0.9946	0.996615
hsa-miR-4776-3p	3.68981	-0.0216363	0.374913	-0.0577102	0.95398	NA
hsa-miR-642b-3p	9.63599	-0.0684504	0.305231	-0.224258	0.822557	0.979612
hsa-miR-126-5p	80814.7	0.167175	0.19448	0.859599	0.39001	0.833919
hsa-miR-4255	3.05375	0.222302	0.408249	0.544524	0.586081	NA
hsa-miR-5690	26.2481	0.610957	0.264178	2.31267	0.0207406	0.20822
hsa-miR-3198	4.41432	-0.0448149	0.408109	-0.109811	0.912559	NA
hsa-miR-5687	0.767862	-0.522277	0.401751	-1.3	0.1936	NA
hsa-miR-4758-5p	1.91693	-0.551071	0.419975	-1.31215	0.189469	NA
hsa-miR-651-5p	51.7065	0.23638	0.209758	1.12692	0.259777	0.735123
hsa-miR-6776-3p	44.4392	-1.2296	0.228372	-5.38421	7.2763e-08	1.59663e-05
hsa-miR-6732-3p	2.39433	0.165306	0.415519	0.397831	0.690754	NA
hsa-miR-182-5p	822.347	0.298107	0.227053	1.31294	0.189203	0.662127
hsa-miR-2861	4.00146	0.036096	0.380954	0.0947514	0.924512	NA
hsa-miR-510-3p	362.823	0.373162	0.21647	1.72385	0.0847345	0.449412
hsa-miR-8074	5.05121	-0.0456142	0.356159	-0.128073	0.898092	NA
hsa-miR-3675-3p	5.52943	0.109548	0.35391	0.309538	0.756913	0.958748
hsa-miR-5586-5p	2.85177	-0.0672623	0.400122	-0.168105	0.866501	NA
hsa-miR-3610	13.8884	-0.741934	0.366696	-2.02329	0.0430429	0.320941
hsa-miR-335-5p	6426.21	-0.220773	0.197831	-1.11596	0.264437	0.738501
hsa-miR-223-5p	13.1881	0.224836	0.323572	0.694854	0.487147	0.878707
hsa-miR-206	0.772779	-0.287016	0.400952	-0.715837	0.474092	NA
hsa-miR-548e-5p	21.281	-0.203861	0.253022	-0.805704	0.420413	0.843024
hsa-miR-4520-3p	10.492	-0.156008	0.339456	-0.459583	0.645815	0.919344
hsa-miR-1468-3p	1.57349	0.0284976	0.423161	0.0673446	0.946307	NA
hsa-miR-668-5p	9.84088	0.564756	0.355194	1.58999	0.111836	0.538939
hsa-miR-3153	397.639	1.71186	0.33909	5.04839	4.45544e-07	8.55444e-05
hsa-miR-5004-3p	9.24028	-0.113709	0.300607	-0.378263	0.705235	0.940237
hsa-miR-411-5p	32724.9	0.0626504	0.163403	0.383411	0.701415	0.939297
hsa-miR-3912-3p	72.2087	0.174161	0.239448	0.727344	0.467015	0.87722
hsa-miR-4712-5p	3.6984	0.124827	0.386948	0.322593	0.747003	NA
hsa-let-7e-3p	313.826	-0.258295	0.179996	-1.43501	0.151285	0.5989
hsa-miR-5583-3p	1.4714	0.096826	0.422066	0.22941	0.818551	NA
hsa-miR-3122	0.937938	0.219587	0.406508	0.54018	0.589073	NA
hsa-miR-4263	11.2148	0.488008	0.42406	1.1508	0.249815	0.724024
hsa-miR-4312	1.94141	-0.0725107	0.411503	-0.176209	0.86013	NA
hsa-miR-98-5p	37851	0.126948	0.135184	0.939079	0.34769	0.80847
hsa-let-7g-5p	86696.5	-0.439903	0.18703	-2.35204	0.0186708	0.196427
hsa-miR-1178-3p	1.47722	-0.100977	0.423118	-0.238649	0.811378	NA
hsa-miR-204-3p	26.4879	0.189183	0.28598	0.661525	0.508275	0.879255
hsa-miR-4471	4.69213	-0.439259	0.404912	-1.08483	0.277999	NA
hsa-let-7e-5p	31213.1	-0.116285	0.171314	-0.678784	0.497275	0.878707
hsa-miR-6884-5p	1.47665	0.023988	0.420771	0.0570097	0.954537	NA
hsa-miR-6851-5p	6.52449	-0.25963	0.363103	-0.715031	0.47459	0.87722
hsa-miR-4520-2-3p	19.5314	0.331822	0.267634	1.23983	0.215038	0.690608
hsa-miR-888-5p	25.5262	0.244616	0.267441	0.914651	0.360375	0.817631
hsa-miR-3129-3p	7.19461	-0.0247536	0.335431	-0.0737965	0.941172	0.99391
hsa-miR-516b-5p	11.2597	-0.518774	0.326338	-1.58968	0.111906	0.538939
hsa-miR-7113-3p	7.03236	-0.0568344	0.344929	-0.164771	0.869124	0.986697
hsa-miR-3179	4.39658	-0.17722	0.383604	-0.461986	0.644091	NA
hsa-miR-3689b-3p	0.488184	0.413133	0.351094	1.1767	0.239315	NA
hsa-miR-548al	12.3551	-0.42419	0.288907	-1.46826	0.142033	0.58259
hsa-miR-6795-3p	6.16069	-0.149472	0.371141	-0.402736	0.687142	0.93535
hsa-miR-492	0.139305	-0.207652	0.219514	-0.945961	0.344168	NA
hsa-miR-6865-5p	1.12397	0.330742	0.422148	0.783473	0.433349	NA
hsa-miR-1268a	51.2923	0.282778	0.224075	1.26198	0.206956	0.684131
hsa-miR-6832-5p	1.78919	-1.09522	0.424331	-2.58106	0.00984964	NA
hsa-miR-548bb-5p	10.8132	-0.187477	0.291016	-0.644217	0.519435	0.879255
hsa-miR-4750-3p	26.5297	0.0130136	0.252901	0.0514571	0.958961	0.99391
hsa-miR-369-5p	835.338	0.0690552	0.155029	0.445435	0.656006	0.922889
hsa-miR-4660	0.623816	0.0298887	0.356237	0.0839013	0.933135	NA
hsa-miR-4804-3p	1.6947	-0.0960066	0.421977	-0.227516	0.820022	NA
hsa-miR-6757-3p	3.54215	-0.767755	0.397841	-1.9298	0.0536311	NA
hsa-miR-6869-5p	5.77737	-0.253415	0.379861	-0.667124	0.504693	0.879255
hsa-miR-4443	259.279	-0.273061	0.280265	-0.974293	0.329911	0.794298
hsa-miR-4755-5p	1.13495	0.186467	0.419391	0.444612	0.6566	NA
hsa-miR-425-3p	241.48	0.125111	0.191063	0.654816	0.512586	0.879255
hsa-miR-3137	1.73729	-0.231468	0.423312	-0.546802	0.584515	NA
hsa-miR-7151-3p	27.696	0.340027	0.313408	1.08493	0.277951	0.746386
hsa-miR-3652	3.72477	0.0393013	0.420744	0.0934092	0.925579	NA
hsa-miR-8070	5.65911	-0.322336	0.372207	-0.866013	0.386483	0.833919
hsa-miR-6879-5p	8.21005	-0.172449	0.327812	-0.526061	0.598846	0.904603
hsa-miR-3651	10.6376	-0.454582	0.328945	-1.38194	0.16699	0.631764
hsa-miR-6764-3p	8.87295	-0.156848	0.359905	-0.435804	0.662979	0.924919
hsa-miR-550a-3-5p	21.7609	-0.213532	0.266597	-0.800954	0.423158	0.843024
hsa-miR-5588-3p	122.117	0.471981	0.395922	1.1921	0.233221	0.703786
hsa-miR-4766-3p	1.43189	-0.213447	0.423264	-0.504289	0.614058	NA
hsa-miR-1199-5p	9.86629	0.459933	0.331583	1.38708	0.165417	0.628911
hsa-miR-423-3p	10189.7	-0.43323	0.190651	-2.27237	0.0230644	0.227095
hsa-miR-1247-5p	389.085	0.281819	0.255326	1.10376	0.269697	0.742653
hsa-miR-5001-3p	20.9342	-0.0541408	0.274552	-0.197197	0.843674	0.985115
hsa-miR-4740-5p	4.2109	0.244918	0.372579	0.657357	0.510951	NA
hsa-miR-6075	14.8707	0.595576	0.326576	1.8237	0.0681981	0.412411
hsa-miR-214-5p	10.9275	0.162096	0.296184	0.547283	0.584184	0.900127
hsa-miR-3190-5p	2.30186	-0.720936	0.410022	-1.75828	0.0786994	NA
hsa-miR-4664-3p	11.1884	0.282006	0.311298	0.905906	0.364985	0.821482
hsa-miR-6076	1.25371	0.405047	0.418652	0.967502	0.333293	NA
hsa-miR-3155b	55.1726	0.897874	0.265615	3.38036	0.000723902	0.0191709
hsa-miR-6765-5p	9.18719	0.493714	0.369639	1.33566	0.181659	0.656537
hsa-miR-139-3p	440.376	-0.0757474	0.207633	-0.364813	0.715251	0.943026
hsa-miR-544a	20.9593	0.0778488	0.312521	0.249099	0.803284	0.977595
hsa-miR-3691-5p	7.92302	-0.00386682	0.352816	-0.0109599	0.991255	0.995794
hsa-miR-3074-3p	63.2671	-0.349796	0.196393	-1.7811	0.0748958	0.435757
hsa-miR-581	3.66318	0.809193	0.395746	2.04473	0.0408818	NA
hsa-miR-511-5p	5.01438	-0.684144	0.363024	-1.88457	0.0594878	NA
hsa-miR-4500	35.0343	0.486095	0.240941	2.01748	0.0436451	0.323859
hsa-miR-3609	29.1442	-0.103022	0.355602	-0.289713	0.772036	0.965674
hsa-miR-4676-3p	2.7554	-0.0203123	0.414049	-0.0490578	0.960873	NA
hsa-miR-497-5p	1916.84	-0.0280978	0.211215	-0.13303	0.89417	0.988534
hsa-miR-4296	1.55351	0.348924	0.419735	0.831297	0.405806	NA
hsa-miR-3666	1.7912	-0.18566	0.418017	-0.444143	0.656939	NA
hsa-miR-3134	1.21568	-0.0266355	0.424023	-0.0628162	0.949913	NA
hsa-miR-548ba	16.5441	-0.164892	0.309151	-0.533371	0.593777	0.902829
hsa-miR-619-3p	1.61854	-0.125224	0.424756	-0.294814	0.768136	NA
hsa-miR-4649-5p	8.49566	0.0401737	0.363686	0.110463	0.912043	0.988534
hsa-miR-378j	10.7563	-0.461901	0.327507	-1.41036	0.158434	0.617436
hsa-miR-3151-5p	20.872	-0.0087471	0.250287	-0.0349482	0.972121	0.99391
hsa-miR-1-3p	99.379	-0.75987	0.340904	-2.22898	0.0258149	0.239933
hsa-miR-106b-5p	781.329	0.0924939	0.238247	0.388226	0.697849	0.937796
hsa-miR-3181	8.05129	0.161636	0.355402	0.454797	0.649255	0.92001
hsa-miR-320d	46.5536	-0.165554	0.213576	-0.775152	0.43825	0.853171
hsa-miR-6756-3p	13.1618	-0.42429	0.352658	-1.20312	0.228929	0.697055
hsa-miR-7111-3p	6.85964	0.330486	0.365038	0.905347	0.365281	0.821482
hsa-miR-6807-5p	38.2589	0.317397	0.310706	1.02153	0.307001	0.778936
hsa-miR-6846-5p	14.093	-0.222988	0.384995	-0.579198	0.562456	0.894054
hsa-miR-548av-5p	225.163	-0.266304	0.236399	-1.1265	0.259953	0.735123
hsa-miR-21-5p	10631.6	0.0281315	0.258185	0.108959	0.913235	0.988534
hsa-miR-597-5p	12.9404	0.224953	0.28036	0.802374	0.422337	0.843024
hsa-miR-8085	2.11333	0.256216	0.42531	0.602421	0.546894	NA
hsa-miR-320c	67.7386	0.385163	0.314927	1.22302	0.221321	0.694636
hsa-miR-2682-5p	278.515	0.566516	0.186438	3.03862	0.00237661	0.0445179
hsa-miR-1471	11.3508	0.102114	0.29743	0.34332	0.731358	0.951704
hsa-miR-548d-5p	9.49845	-0.2746	0.309326	-0.887737	0.374683	0.829268
hsa-miR-4531	17.9923	-0.278244	0.320945	-0.866953	0.385968	0.833919
hsa-miR-22-3p	304678	0.0625535	0.131799	0.474613	0.635063	0.91663
hsa-miR-1247-3p	1.89998	0.905794	0.421647	2.14823	0.0316959	NA
hsa-miR-548ad-5p	89.1737	-0.135784	0.209665	-0.647624	0.517228	0.879255
hsa-miR-5187-5p	5.95898	0.806476	0.34094	2.36545	0.0180082	0.192087
hsa-miR-323a-3p	5157.92	0.177955	0.208836	0.852126	0.394144	0.833919
hsa-miR-7706	73.2354	-0.178575	0.204132	-0.874799	0.381683	0.833919
hsa-miR-4298	2.40648	0.196531	0.421182	0.466618	0.640773	NA
hsa-miR-6739-3p	8.65861	-0.156966	0.295606	-0.530998	0.59542	0.902829
hsa-miR-7-5p	6610.99	-0.121127	0.251917	-0.48082	0.630644	0.91663
hsa-miR-488-3p	2387.63	0.113871	0.186423	0.610818	0.54132	0.891177
hsa-miR-3960	71.1884	-0.202933	0.359759	-0.564079	0.5727	0.898537
hsa-miR-1256	3.03339	0.479921	0.398202	1.20522	0.228118	NA
hsa-miR-2054	4.76324	-0.197767	0.408553	-0.484066	0.628339	NA
hsa-miR-4425	3.30918	0.481713	0.410381	1.17382	0.240468	NA
hsa-miR-1260b	261.986	0.613057	0.368984	1.66148	0.0966179	0.491408
hsa-miR-7151-5p	5.53707	-0.16834	0.361313	-0.465912	0.641279	0.917032
hsa-miR-372-5p	0.53888	-0.149051	0.382759	-0.389411	0.696972	NA
hsa-miR-6724-5p	234.69	0.130939	0.246362	0.531489	0.59508	0.902829
hsa-miR-367-5p	0.4893	0.082163	0.368487	0.222974	0.823556	NA
hsa-miR-7515	0.672678	-0.336875	0.402639	-0.836668	0.402779	NA
hsa-miR-6790-5p	0.188774	-0.0300996	0.284844	-0.10567	0.915844	NA
hsa-miR-2115-5p	17.9717	-0.192897	0.259418	-0.743576	0.457133	0.873195
hsa-miR-6793-3p	13.4213	0.0319422	0.308862	0.103419	0.91763	0.989109
hsa-miR-1277-3p	5.50609	0.0435355	0.356502	0.122118	0.902805	0.988534
hsa-miR-6825-3p	8.86431	0.131709	0.36534	0.360512	0.718464	0.945639
hsa-miR-640	12.5387	-1.27951	0.314849	-4.06388	4.82644e-05	0.00308892
hsa-miR-3194-3p	1.59785	-0.801628	0.424953	-1.88639	0.0592421	NA
hsa-miR-6829-5p	3.79691	0.559383	0.380705	1.46934	0.141742	NA
hsa-miR-211-3p	1.81728	-0.0750949	0.4241	-0.177069	0.859454	NA
hsa-miR-1539	48.1173	-0.310304	0.239512	-1.29557	0.195124	0.666025
hsa-miR-655-5p	4.62246	0.224091	0.357168	0.627412	0.530389	NA
hsa-miR-532-5p	1854.61	-0.0827638	0.145233	-0.569867	0.568768	0.897937
hsa-miR-4766-5p	0.276817	-0.134283	0.304128	-0.441535	0.658826	NA
hsa-miR-5580-5p	0.239358	0.240007	0.310763	0.772315	0.439928	NA
hsa-miR-6822-3p	2.26555	0.633733	0.413001	1.53446	0.124917	NA
hsa-miR-494-3p	91.4362	0.104159	0.244661	0.425727	0.670307	0.926883
hsa-miR-7155-3p	12.7443	-0.0991581	0.275001	-0.360573	0.718419	0.945639
hsa-miR-6824-5p	1.52327	-0.571864	0.423462	-1.35045	0.176871	NA
hsa-let-7f-1-3p	0.501813	0.328526	0.38457	0.854269	0.392956	NA
hsa-miR-365a-3p	1211.11	-0.258832	0.218514	-1.18451	0.236211	0.707199
hsa-miR-577	2282.88	-0.742017	0.359412	-2.06453	0.0389673	0.300773
hsa-miR-6129	2.01328	-0.613552	0.424937	-1.44386	0.148777	NA
hsa-miR-3148	1.12144	-0.243981	0.418902	-0.582428	0.560278	NA
hsa-miR-769-3p	287.977	0.558662	0.219285	2.54765	0.010845	0.13654
hsa-miR-5006-5p	3.9661	0.767198	0.404931	1.89464	0.0581403	NA
hsa-miR-6821-5p	7.518	-0.06484	0.341559	-0.189836	0.849438	0.985837
hsa-miR-6840-3p	3.58041	0.277145	0.400784	0.691507	0.489247	NA
hsa-miR-6888-5p	0.203069	0.0622869	0.267047	0.233244	0.815572	NA
hsa-miR-6773-3p	5.06119	-0.00357792	0.36745	-0.00973714	0.992231	NA
hsa-miR-3940-3p	40.8789	-0.00419931	0.302873	-0.0138649	0.988938	0.994965
hsa-miR-523-3p	11.9302	-0.142262	0.301552	-0.471766	0.637094	0.91663
hsa-miR-33b-3p	3.55826	0.743852	0.402355	1.84875	0.0644942	NA
hsa-miR-376a-5p	134.919	0.711031	0.26692	2.66384	0.00772547	0.105949
hsa-miR-600	5.3603	0.300098	0.378614	0.792623	0.427998	0.846047
hsa-miR-3202	1.2501	0.0333085	0.423969	0.0785636	0.93738	NA
hsa-miR-4640-3p	12.3643	-0.215467	0.286016	-0.75334	0.451246	0.866392
hsa-miR-4767	8.41203	0.0216176	0.325253	0.0664641	0.947008	0.99391
hsa-miR-551a	1.76715	-0.242836	0.419221	-0.579255	0.562417	NA
hsa-miR-371a-5p	10.381	1.03329	0.409299	2.52453	0.0115854	0.143498
hsa-miR-4288	6.75758	-0.277913	0.327149	-0.849501	0.395602	0.834331
hsa-miR-3124-3p	2.45944	-0.440953	0.4077	-1.08156	0.279448	NA
hsa-miR-7846-3p	15.1231	-0.347907	0.362275	-0.96034	0.336884	0.79854
hsa-miR-4659b-5p	3.56214	-0.519263	0.384321	-1.35112	0.176658	NA
hsa-miR-6802-5p	15.3098	0.971263	0.359426	2.70226	0.00688695	0.0970492
hsa-miR-6751-5p	4.94837	-0.514925	0.36935	-1.39414	0.163275	NA
hsa-miR-1273g-5p	5.90155	-0.392158	0.41388	-0.947518	0.343375	0.805227
hsa-miR-7107-5p	4.48813	-0.0674956	0.379005	-0.178086	0.858655	NA
hsa-miR-4665-3p	3315.24	-0.407175	0.32742	-1.24359	0.213652	0.689432
hsa-miR-1908-5p	240.306	-0.0174495	0.365428	-0.047751	0.961915	0.99391
hsa-miR-6728-5p	1.55605	0.671385	0.422149	1.5904	0.111745	NA
hsa-miR-6769b-3p	7.61165	-0.180583	0.33836	-0.5337	0.593549	0.902829
hsa-miR-6761-5p	9.18002	0.264434	0.346426	0.76332	0.445272	0.859219
hsa-miR-335-3p	5334.66	-0.249779	0.179553	-1.39112	0.164189	0.627349
hsa-miR-5090	17.7828	0.503802	0.292574	1.72196	0.0850759	0.449412
hsa-miR-4700-3p	2.80781	0.692992	0.424756	1.63151	0.102783	NA
hsa-miR-7157-5p	128.725	2.30119	0.338509	6.79804	1.06055e-11	5.43e-09
hsa-miR-4772-5p	57.9903	-2.05426	0.249404	-8.23666	1.77084e-16	1.36e-13
hsa-miR-146b-3p	369.848	-0.0536092	0.17716	-0.302603	0.762192	0.959899
hsa-miR-6719-3p	13.7804	-0.0603203	0.33053	-0.182496	0.855194	0.985837
hsa-miR-1224-3p	191.114	0.152308	0.241448	0.630811	0.528164	0.884689
hsa-miR-3663-3p	5.49239	0.0908227	0.3527	0.257507	0.796788	0.977595
hsa-miR-4754	4.68462	-0.0641462	0.402249	-0.159469	0.873299	NA
hsa-miR-6085	2.93054	-0.26519	0.410272	-0.646376	0.518036	NA
hsa-miR-6742-5p	245.279	-0.19546	0.385283	-0.507314	0.611935	0.91663
hsa-miR-191-3p	85.3477	-0.127275	0.17713	-0.718538	0.472426	0.87722
hsa-miR-6750-5p	2.73416	-0.109257	0.403173	-0.270994	0.786396	NA
hsa-miR-520a-5p	6.88928	1.13428	0.346267	3.27573	0.0010539	0.0240134
hsa-miR-4796-3p	1.38218	0.201341	0.422747	0.476268	0.633884	NA
hsa-miR-3977	12.8403	0.0757992	0.321837	0.23552	0.813805	0.979612
hsa-miR-3680-3p	0.560563	-0.00851158	0.370348	-0.0229826	0.981664	NA
hsa-miR-4729	2.25926	-0.154369	0.407693	-0.378641	0.704955	NA
hsa-miR-4502	0.963826	0.251817	0.41808	0.602319	0.546962	NA
hsa-miR-4638-5p	1.92634	0.24657	0.416954	0.591362	0.554278	NA
hsa-miR-6875-3p	10.3641	-0.336502	0.316521	-1.06313	0.287724	0.760662
hsa-miR-198	0	NA	NA	NA	NA	NA
hsa-miR-744-3p	294.552	0.116572	0.175801	0.663095	0.50727	0.879255
hsa-miR-4753-5p	2.88334	0.426108	0.395988	1.07606	0.281899	NA
hsa-miR-145-3p	62.4249	-0.549347	0.281356	-1.9525	0.050879	0.344274
hsa-miR-6819-5p	24.0077	-0.653202	0.311043	-2.10004	0.0357252	0.291152
hsa-miR-4431	8.06092	0.228086	0.367476	0.620684	0.534808	0.887962
hsa-miR-6814-5p	5.96667	0.741915	0.374442	1.98139	0.0475476	0.336558
hsa-miR-6082	6061.83	-0.6341	0.425997	-1.48851	0.136617	0.578638
hsa-miR-3117-3p	100.499	0.510417	0.229648	2.2226	0.0262427	0.239933
hsa-miR-3619-3p	3.41771	0.149845	0.378342	0.396058	0.692063	NA
hsa-miR-7844-5p	0.911376	-0.518476	0.40613	-1.27663	0.201734	NA
hsa-miR-4521	4.28935	-0.338566	0.376654	-0.898878	0.368718	NA
hsa-miR-612	1.94786	-0.131194	0.425493	-0.308333	0.757829	NA
hsa-miR-1910-3p	4.66844	0.324898	0.377997	0.859526	0.39005	NA
hsa-miR-101-3p	30567.2	0.0339154	0.199168	0.170285	0.864786	0.986697
hsa-miR-3686	2.26456	0.237921	0.424955	0.559872	0.575567	NA
hsa-miR-6818-3p	6.58206	0.0725542	0.331962	0.218562	0.826992	0.980138
hsa-miR-5699-5p	84.5129	0.444314	0.220676	2.01342	0.0440701	0.325441
hsa-miR-548o-3p	38.2212	-0.0941813	0.247962	-0.379822	0.704077	0.940237
hsa-miR-135a-5p	5048.4	0.463556	0.278169	1.66645	0.0956236	0.487966
hsa-miR-509-5p	3.7987	-0.754578	0.396725	-1.90202	0.0571686	NA
hsa-miR-508-5p	0.604941	-0.221811	0.384035	-0.577581	0.563547	NA
hsa-miR-6835-3p	2.54671	-0.0977133	0.410947	-0.237776	0.812055	NA
hsa-miR-4795-5p	7.52893	0.0301546	0.339439	0.0888366	0.929212	0.99391
hsa-miR-1295b-5p	5.33621	-0.089171	0.357104	-0.249706	0.802815	0.977595
hsa-miR-151a-5p	62197.8	-0.576963	0.19466	-2.96395	0.00303717	0.0501623
hsa-miR-1229-3p	59.3654	0.177682	0.226192	0.785537	0.432139	0.847721
hsa-miR-4488	548.506	-0.160512	0.393277	-0.408141	0.68317	0.934254
hsa-miR-6865-3p	7.68421	0.234084	0.370838	0.63123	0.52789	0.884689
hsa-miR-4708-3p	4.61546	0.487475	0.398636	1.22286	0.221383	NA
hsa-miR-3529-5p	150.282	0.119376	0.215289	0.554494	0.579241	0.900127
hsa-miR-3942-3p	121.695	-0.882754	0.22951	-3.84625	0.000119938	0.00591233
hsa-miR-4787-3p	165.364	0.480984	0.26349	1.82544	0.0679354	0.412411
hsa-miR-4474-5p	2.05003	0.147822	0.420711	0.351361	0.725317	NA
hsa-miR-1304-5p	12.4404	-0.112273	0.340638	-0.329596	0.741705	0.956135
hsa-miR-2467-5p	379.325	-0.0843939	0.190779	-0.442364	0.658226	0.922889
hsa-miR-891b	66.1965	-0.284634	0.281039	-1.01279	0.31116	0.783525
hsa-miR-424-3p	55.4494	-0.0566762	0.211094	-0.268487	0.788324	0.971803
hsa-miR-5681a	0.470437	-0.681309	0.367215	-1.85534	0.0635473	NA
hsa-miR-544b	3.74735	-0.240146	0.403098	-0.595751	0.551342	NA
hsa-miR-629-3p	63.705	0.627752	0.276023	2.27428	0.0229494	0.227095
hsa-miR-524-5p	0.639795	-0.282101	0.399944	-0.705353	0.48059	NA
hsa-miR-4321	9.21046	-0.296106	0.351382	-0.842689	0.399402	0.834331
hsa-miR-6895-3p	23.1987	0.398193	0.30879	1.28953	0.197214	0.671665
hsa-miR-656-3p	1089.07	0.0866884	0.149471	0.57997	0.561935	0.894054
hsa-miR-6759-3p	2.37884	0.22115	0.424573	0.520875	0.602454	NA
hsa-miR-675-5p	2.52292	0.134861	0.401826	0.33562	0.737157	NA
hsa-miR-6767-5p	8.53122	0.581963	0.354787	1.64032	0.100939	0.501754
hsa-miR-3128	13.7874	-0.349536	0.308643	-1.13249	0.257428	0.73496
hsa-miR-1287-5p	48.1534	0.300767	0.225859	1.33166	0.182972	0.659731
hsa-miR-5088-5p	4.22786	0.25914	0.376039	0.689132	0.49074	NA
hsa-miR-3671	1.92205	0.41898	0.418822	1.00038	0.317128	NA
hsa-miR-3197	4.86107	-0.78595	0.384504	-2.04406	0.0409474	NA
hsa-miR-203a-5p	0.0438555	0.0686209	0.194115	0.353507	0.723709	NA
hsa-miR-487a-5p	176.956	0.0743984	0.215962	0.344498	0.730471	0.951704
hsa-miR-208a-3p	1.96816	0.125162	0.422758	0.296061	0.767184	NA
hsa-miR-454-5p	50.9804	-0.21544	0.2073	-1.03927	0.298681	0.772347
hsa-miR-654-5p	98.3204	0.0913196	0.206399	0.442442	0.658169	0.922889
hsa-miR-5696	6.28826	-0.423964	0.342197	-1.23895	0.215365	0.690608
hsa-miR-6508-5p	1.94677	-0.449705	0.419288	-1.07254	0.283476	NA
hsa-miR-3678-5p	16.7026	0.508806	0.289966	1.75471	0.0793091	0.442168
hsa-miR-4492	252.284	-0.222984	0.417369	-0.534262	0.593161	0.902829
hsa-miR-548aq-3p	13.0959	-0.196455	0.327457	-0.599942	0.548545	0.893925
hsa-miR-4448	2920.66	-0.498553	0.238398	-2.09126	0.0365047	0.291271
hsa-miR-3919	27.4955	0.402112	0.240357	1.67298	0.0943314	0.482977
hsa-miR-339-3p	461.696	0.324826	0.168429	1.92856	0.0537853	0.35544
hsa-miR-628-5p	1281.64	0.13925	0.18232	0.763764	0.445008	0.859219
hsa-miR-455-5p	245.334	0.16603	0.213609	0.777262	0.437004	0.851902
hsa-miR-6797-5p	3.71996	0.403998	0.421902	0.957563	0.338283	NA
hsa-miR-6717-5p	4.13952	-0.111826	0.393309	-0.284321	0.776164	NA
hsa-miR-6854-3p	9.61654	0.0410131	0.305188	0.134386	0.893097	0.988534
hsa-miR-6788-3p	6.91915	0.109363	0.397366	0.275219	0.783148	0.970458
hsa-miR-6833-5p	0.606756	-0.0234784	0.396493	-0.0592152	0.952781	NA
hsa-miR-6801-3p	7.69226	1.01391	0.338418	2.99601	0.00273534	0.0476738
hsa-miR-6881-5p	6.2872	-0.104871	0.396984	-0.26417	0.791649	0.973557
hsa-miR-4668-3p	21.3263	-0.466615	0.272935	-1.70962	0.0873361	0.456287
hsa-miR-3714	2.52607	0.191089	0.412873	0.462828	0.643488	NA
hsa-miR-3613-5p	99.8384	-0.21276	0.209075	-1.01763	0.308856	0.780268
hsa-miR-1236-3p	3.01261	-0.0352164	0.396344	-0.0888529	0.929199	NA
hsa-miR-1301-3p	2994.77	-0.646602	0.193786	-3.33668	0.000847858	0.021005
hsa-miR-520f-3p	3.52093	0.173397	0.411219	0.421666	0.673269	NA
hsa-miR-3913-5p	14.0616	-0.280208	0.274287	-1.02159	0.306976	0.778936
hsa-miR-5683	407.306	0.152929	0.357645	0.427601	0.668942	0.926883
hsa-miR-4798-3p	7.72458	0.737746	0.356455	2.06968	0.0384824	0.300046
hsa-miR-410-3p	20352.8	0.434546	0.12594	3.45042	0.000559721	0.0171946
hsa-miR-3140-5p	34.1148	-0.203112	0.327651	-0.619904	0.535321	0.887962
hsa-miR-4328	31.1816	-0.0543965	0.243087	-0.223774	0.822934	0.979612
hsa-miR-4539	3.27248	-0.00743205	0.419231	-0.0177278	0.985856	NA
hsa-miR-4740-3p	3.07163	0.187154	0.415807	0.450098	0.65264	NA
hsa-miR-6715b-3p	10.6394	0.48619	0.37123	1.30967	0.190306	0.662127
hsa-miR-6851-3p	2.72845	0.111211	0.396544	0.280449	0.779133	NA
hsa-miR-558	2.66044	-0.330891	0.424054	-0.780303	0.435212	NA
hsa-miR-4693-5p	2.18907	-0.567916	0.424031	-1.33933	0.180464	NA
hsa-miR-409-5p	13017.2	-0.850259	0.259758	-3.27328	0.00106308	0.0240134
hsa-miR-3934-3p	5.66718	-0.269443	0.387115	-0.696028	0.486411	0.878707
hsa-miR-3614-3p	3.86472	0.232669	0.387784	0.599995	0.548509	NA
hsa-miR-627-3p	8.83071	-0.141612	0.30657	-0.461924	0.644136	0.917804
hsa-miR-4723-3p	2.0678	0.26945	0.422022	0.638474	0.523165	NA
hsa-miR-874-3p	10006.8	-0.118629	0.159136	-0.745461	0.455993	0.873195
hsa-miR-6847-3p	1.71546	0.175547	0.419327	0.418639	0.67548	NA
hsa-miR-4800-5p	6.18224	-0.113756	0.359493	-0.316436	0.751672	0.958748
hsa-miR-196b-3p	1.67158	-0.142779	0.419082	-0.340695	0.733333	NA
hsa-miR-4436b-3p	2.87359	0.622167	0.404306	1.53885	0.12384	NA
hsa-miR-8064	1.20655	0.073053	0.419734	0.174046	0.861829	NA
hsa-miR-8078	10.6947	-0.303492	0.295647	-1.02654	0.304639	0.778919
hsa-miR-566	3.76109	0.354547	0.400507	0.885245	0.376024	NA
hsa-miR-6729-5p	4.21013	-0.150507	0.416495	-0.361366	0.717826	NA
hsa-miR-6515-3p	8.03036	0.118388	0.317052	0.373404	0.708848	0.941592
hsa-miR-556-3p	8.99567	-0.672339	0.319824	-2.10222	0.0355342	0.291152
hsa-miR-891a-5p	73.6644	-0.546262	0.268324	-2.03583	0.041767	0.318538
hsa-miR-3622a-5p	56.9896	0.355714	0.202116	1.75995	0.0784159	0.442168
hsa-miR-573	0.322567	0.133055	0.354512	0.375318	0.707424	NA
hsa-miR-27b-5p	212.721	-0.231932	0.190156	-1.2197	0.22258	0.694636
hsa-miR-6864-5p	12.3433	0.0591178	0.302996	0.195111	0.845306	0.985115
hsa-miR-4684-3p	1.52549	0.601336	0.421059	1.42815	0.153249	NA
hsa-miR-1306-3p	29.706	0.112162	0.228695	0.490445	0.623819	0.91663
hsa-miR-6838-5p	4.36951	0.134339	0.383172	0.350597	0.725891	NA
hsa-miR-30a-5p	142373	0.129102	0.199406	0.647435	0.51735	0.879255
hsa-miR-8058	1.5192	0.364454	0.418469	0.870923	0.383796	NA
hsa-miR-154-3p	95.4265	0.434257	0.229318	1.89369	0.0582662	0.374634
hsa-miR-518c-5p	1.00466	0.0949408	0.422104	0.224923	0.822039	NA
hsa-miR-5580-3p	0.826409	0.282589	0.408694	0.691444	0.489287	NA
hsa-miR-522-3p	34.5721	-0.419619	0.288378	-1.4551	0.145642	0.588483
hsa-miR-645	2.9559	-0.486964	0.408139	-1.19313	0.232818	NA
hsa-miR-4481	1.92845	-0.226324	0.415099	-0.54523	0.585596	NA
hsa-miR-3192-3p	6.33271	0.0859588	0.421549	0.203912	0.838423	0.983817
hsa-miR-7-2-3p	18.7565	0.356414	0.273474	1.30328	0.192479	0.664172
hsa-miR-6774-5p	15.4512	-0.226229	0.38287	-0.590878	0.554602	0.894054
hsa-miR-1200	17.6576	-0.199042	0.28993	-0.686518	0.492387	0.878707
hsa-miR-140-3p	5140.02	-0.0013196	0.186779	-0.00706502	0.994363	0.996615
hsa-miR-3622b-3p	22.6913	-0.260007	0.267731	-0.971148	0.331475	0.794298
hsa-miR-887-3p	657.156	0.130339	0.182192	0.715392	0.474367	0.87722
hsa-miR-3923	0.598644	-0.025025	0.386263	-0.0647876	0.948343	NA
hsa-miR-760	428.769	0.297032	0.192582	1.54237	0.122984	0.551177
hsa-miR-5002-3p	6.474	0.20106	0.348817	0.576407	0.56434	0.894054
hsa-miR-4497	272.826	0.0921801	0.212579	0.433628	0.664559	0.925073
hsa-miR-4529-3p	2.02639	0.404585	0.420331	0.96254	0.335779	NA
hsa-miR-4789-5p	1.6791	0.136009	0.423087	0.321469	0.747855	NA
hsa-miR-3126-3p	1.162	0.0459552	0.423218	0.108585	0.913532	NA
hsa-miR-4652-3p	6.20136	0.0105389	0.372827	0.0282676	0.977449	0.99391
hsa-miR-518a-5p	2.10811	-0.329274	0.420355	-0.783325	0.433436	NA
hsa-miR-6836-3p	23.5723	-0.0553433	0.320174	-0.172854	0.862766	0.986338
hsa-miR-3143	0.142607	0.0841221	0.252683	0.332916	0.739198	NA
hsa-miR-4673	10.4398	1.31132	0.338348	3.87565	0.00010634	0.00585374
hsa-miR-5706	46.999	0.0432575	0.371306	0.116501	0.907256	0.988534
hsa-miR-4757-3p	8.00608	0.220968	0.318816	0.693089	0.488254	0.878707
hsa-miR-93-3p	157.326	-0.823058	0.22011	-3.7393	0.00018453	0.00766049
hsa-miR-5187-3p	6.67833	-0.0164964	0.335624	-0.0491514	0.960799	0.99391
hsa-miR-6777-3p	25.3435	0.1338	0.230561	0.580321	0.561698	0.894054
hsa-miR-5692b	0.39928	-0.155041	0.362109	-0.428161	0.668534	NA
hsa-miR-1288-5p	1.21554	-0.440733	0.422636	-1.04282	0.297033	NA
hsa-miR-1909-5p	9.96768	-0.0390577	0.303175	-0.128829	0.897493	0.988534
hsa-miR-4434	14.6613	0.0620844	0.32524	0.190888	0.848613	0.985837
hsa-miR-6877-3p	10.9534	0.0116115	0.295443	0.0393018	0.96865	0.99391
hsa-miR-125b-1-3p	2447.45	-0.00925664	0.139207	-0.0664955	0.946983	0.99391
hsa-miR-4265	1.26816	0.0605824	0.421708	0.14366	0.885769	NA
hsa-miR-551b-5p	2.43863	-0.167177	0.402639	-0.415203	0.677994	NA
hsa-miR-4452	1.69908	0.359003	0.421885	0.85095	0.394797	NA
hsa-miR-8066	2.77962	-0.10471	0.407244	-0.257119	0.797087	NA
hsa-miR-761	9.14042	0.014241	0.376826	0.037792	0.969854	0.99391
hsa-miR-3176	23.6655	0.200911	0.245043	0.819901	0.412273	0.842089
hsa-miR-6791-3p	5.59265	0.14436	0.354949	0.406706	0.684224	0.934254
hsa-miR-6841-5p	33.8325	-0.0231333	0.243836	-0.0948723	0.924416	0.992246
hsa-miR-4679	2.16709	-0.443617	0.425057	-1.04367	0.29664	NA
hsa-miR-3653-3p	222.81	0.048988	0.23471	0.208717	0.834669	0.982415
hsa-miR-6503-3p	12.1672	0.125275	0.325548	0.384811	0.700377	0.938725
hsa-miR-6890-5p	1.11201	0.475111	0.419931	1.1314	0.257886	NA
hsa-miR-4731-3p	6.76439	-0.11575	0.335692	-0.34481	0.730237	0.951704
hsa-miR-107	1161.79	-0.227271	0.212983	-1.06709	0.285933	0.759727
hsa-miR-6746-5p	6.40207	0.262554	0.364564	0.720186	0.471411	0.87722
hsa-miR-519e-5p	1.98779	0.644478	0.414058	1.55649	0.119591	NA
hsa-miR-4459	12.0622	0.0607437	0.337879	0.17978	0.857326	0.986338
hsa-miR-6782-5p	4.28971	0.364005	0.366687	0.992685	0.320863	NA
hsa-miR-6510-5p	4.57651	0.549104	0.415045	1.323	0.185835	NA
hsa-miR-4280	1.26963	-0.388537	0.424437	-0.915416	0.359973	NA
hsa-miR-718	15.4143	0.750529	0.377018	1.9907	0.0465142	0.333859
hsa-miR-5008-3p	1.91436	0.299273	0.418019	0.715932	0.474033	NA
hsa-miR-378a-5p	101.673	0.150425	0.196986	0.763636	0.445084	0.859219
hsa-miR-6893-5p	3.21545	-0.0787997	0.419336	-0.187915	0.850943	NA
hsa-miR-6734-5p	4.84414	-0.0623101	0.392426	-0.158782	0.873841	NA
hsa-miR-7851-3p	10.9793	0.112656	0.348248	0.323493	0.746322	0.956135
hsa-miR-449c-3p	1.48344	0.22307	0.421212	0.52959	0.596396	NA
hsa-miR-4518	1.20611	0.936651	0.421936	2.21989	0.0264264	NA
hsa-miR-188-3p	9.67826	-0.164861	0.348306	-0.473321	0.635984	0.91663
hsa-miR-1914-5p	14.0153	-0.297391	0.301673	-0.985807	0.324228	0.794298
hsa-miR-517c-3p	1.16232	-0.846869	0.421344	-2.00992	0.0444393	NA
hsa-miR-411-3p	25.1409	0.20459	0.241848	0.845944	0.397584	0.834331
hsa-miR-6800-5p	0.508855	0.115237	0.372918	0.309015	0.75731	NA
hsa-miR-4638-3p	14.3064	-0.163689	0.283318	-0.577757	0.563428	0.894054
hsa-miR-4779	4.07217	0.0283857	0.404744	0.0701324	0.944088	NA
hsa-miR-18b-3p	2.3982	0.146221	0.41468	0.352611	0.72438	NA
hsa-miR-6730-3p	2.45155	-0.135684	0.413556	-0.328091	0.742843	NA
hsa-miR-3121-3p	0.983762	0.104326	0.416228	0.250647	0.802087	NA
hsa-miR-4512	48.2355	0.400781	0.319025	1.25627	0.209019	0.684548
hsa-miR-505-5p	13.6358	-0.246689	0.292927	-0.842153	0.399702	0.834331
hsa-miR-676-5p	7.66676	0.833309	0.358542	2.32416	0.0201167	0.20688
hsa-miR-4311	2.51647	-0.145643	0.410052	-0.355183	0.722453	NA
hsa-miR-6785-5p	9.33931	-0.26282	0.363922	-0.722186	0.47018	0.87722
hsa-miR-4295	0.620935	0.124771	0.402534	0.309964	0.756588	NA
hsa-miR-6744-5p	0.678929	-0.40242	0.398091	-1.01087	0.312076	NA
hsa-miR-5579-5p	0.585598	-0.0405443	0.385089	-0.105286	0.916149	NA
hsa-miR-6511a-3p	258.778	0.327146	0.191239	1.71067	0.0871426	0.456287
hsa-miR-4259	2.58945	-0.580994	0.40707	-1.42726	0.153506	NA
hsa-miR-4653-5p	0.922416	0.735132	0.409194	1.79654	0.0724089	NA
hsa-miR-6753-5p	9.19827	-0.0393015	0.309331	-0.127053	0.898898	0.988534
hsa-miR-6830-3p	3.16991	-0.42749	0.410751	-1.04075	0.297991	NA
hsa-miR-5572	4.58813	-0.30137	0.423022	-0.712421	0.476204	NA
hsa-miR-4319	0.146302	0.187508	0.225413	0.831841	0.405499	NA
hsa-miR-5089-3p	12.6356	0.193024	0.315407	0.611984	0.540549	0.891177
hsa-miR-3157-5p	20.366	0.42	0.302259	1.38954	0.16467	0.627624
hsa-miR-4688	10.5232	0.61576	0.313722	1.96276	0.0496742	0.344274
hsa-miR-20a-3p	11.6058	-0.0529461	0.321374	-0.164749	0.869142	0.986697
hsa-miR-320a	6015.97	0.0875958	0.221594	0.395298	0.692623	0.936734
hsa-miR-3173-5p	9.63456	-0.0961687	0.295011	-0.325984	0.744437	0.956135
hsa-miR-181a-2-3p	1476.93	-0.107791	0.198912	-0.541903	0.587885	0.9008
hsa-miR-4437	6.72367	-1.04583	0.34707	-3.0133	0.0025842	0.0469275
hsa-miR-3133	3.33905	-0.434229	0.398959	-1.08841	0.276416	NA
hsa-miR-325	0.630085	0.251706	0.39707	0.633908	0.526141	NA
hsa-miR-6769a-5p	1.30867	-0.534325	0.41687	-1.28176	0.199928	NA
hsa-miR-493-5p	112.175	-0.0380425	0.179403	-0.212051	0.832067	0.981554
hsa-miR-138-2-3p	80.6516	0.377444	0.214346	1.76091	0.0782529	0.442168
hsa-miR-580-5p	1.00198	-0.144756	0.416699	-0.347388	0.7283	NA
hsa-miR-4804-5p	11.6222	-0.307986	0.329965	-0.93339	0.350619	0.80847
hsa-miR-4445-3p	35.7305	0.067501	0.272934	0.247316	0.804664	0.977595
hsa-miR-6133	1.69055	-0.182055	0.421037	-0.432397	0.665453	NA
hsa-miR-4536-3p	5.13798	0.0734716	0.369006	0.199107	0.842179	NA
hsa-miR-548ay-3p	15.7925	-0.14197	0.269947	-0.525917	0.598946	0.904603
hsa-miR-6772-5p	2.29623	-0.0514286	0.404769	-0.127057	0.898896	NA
hsa-miR-1267	5.53694	-0.0498623	0.3677	-0.135606	0.892133	0.988534
hsa-miR-1343-5p	8.48898	0.330913	0.411588	0.803991	0.421402	0.843024
hsa-miR-33a-3p	0.390864	0.0468069	0.352458	0.132801	0.89435	NA
hsa-miR-6500-5p	117.486	0.393927	0.302512	1.30219	0.192852	0.664172
hsa-miR-4734	6.54536	-0.302502	0.358233	-0.844428	0.39843	0.834331
hsa-miR-1271-5p	3370.15	-0.899669	0.240225	-3.7451	0.00018032	0.00766049
hsa-miR-582-5p	1205.97	0.267125	0.174961	1.52677	0.126818	0.557333
hsa-miR-4707-5p	53.3864	0.382855	0.274716	1.39364	0.163426	0.625992
hsa-miR-663a	18.5399	-0.078044	0.30762	-0.253703	0.799725	0.977595
hsa-miR-6812-5p	27.4572	-1.33554	0.336948	-3.96365	7.38119e-05	0.004535
hsa-miR-4664-5p	7.43136	-0.559464	0.359883	-1.55457	0.120048	0.549435
hsa-miR-203b-5p	543.524	-0.809356	0.311896	-2.59496	0.00946023	0.122748
hsa-miR-4746-3p	1.62956	0.0777013	0.417314	0.186194	0.852293	NA
hsa-miR-137	1655.53	0.321731	0.242865	1.32473	0.18526	0.662127
hsa-miR-1324	14.914	-0.0170651	0.386954	-0.0441011	0.964824	0.99391
hsa-miR-99a-3p	752.143	0.234684	0.172832	1.35787	0.174504	0.644931
hsa-miR-6734-3p	4.96658	0.472401	0.361132	1.30811	0.190835	NA
hsa-miR-589-3p	23.1377	-0.235028	0.255193	-0.920982	0.35706	0.813716
hsa-miR-5589-3p	3.19189	-0.0847128	0.425066	-0.199293	0.842033	NA
hsa-miR-6126	27.006	-0.206732	0.255039	-0.810589	0.417602	0.843024
hsa-miR-132-5p	1622.58	-0.330235	0.194144	-1.70098	0.0889459	0.461557
hsa-miR-6509-3p	17.5426	1.07982	0.312205	3.45867	0.000542847	0.0171946
hsa-miR-7849-3p	1.73958	0.272567	0.424611	0.641921	0.520925	NA
hsa-miR-514b-5p	0.276716	-0.0988572	0.260715	-0.379178	0.704556	NA
hsa-miR-200a-5p	2.57186	0.629665	0.403382	1.56096	0.118532	NA
hsa-miR-8071	7.80851	0.708576	0.419116	1.69064	0.090905	0.468557
hsa-miR-885-3p	15.0496	-0.481934	0.316137	-1.52445	0.127397	0.557333
hsa-miR-509-3-5p	2.43692	-0.716019	0.408208	-1.75405	0.0794213	NA
hsa-miR-6875-5p	5.09041	-0.140349	0.378507	-0.370795	0.71079	NA
hsa-miR-543	809.688	-0.0119513	0.170048	-0.070282	0.943969	0.99391
hsa-miR-6811-3p	1.92968	-0.799649	0.417916	-1.91342	0.0556941	NA
hsa-miR-4467	65.3858	0.0359639	0.283631	0.126798	0.8991	0.988534
hsa-miR-3606-5p	1.42634	0.662863	0.415206	1.59647	0.110384	NA
hsa-miR-4275	1.08678	0.109554	0.409905	0.267267	0.789264	NA
hsa-miR-630	3.38687	-0.138926	0.417074	-0.333097	0.739061	NA
hsa-miR-6849-3p	10.2122	0.159691	0.368296	0.433595	0.664583	0.925073
hsa-miR-4755-3p	11.6902	0.671985	0.3572	1.88126	0.0599368	0.380425
hsa-miR-598-3p	4597.16	0.207637	0.242567	0.855999	0.391998	0.833919
hsa-miR-485-3p	1686.82	0.529909	0.206084	2.57133	0.010131	0.129677
hsa-miR-6849-5p	0.493303	-0.0465441	0.366164	-0.127112	0.898851	NA
hsa-miR-4711-5p	3.9534	0.869147	0.411114	2.11413	0.0345042	NA
hsa-miR-337-3p	83.1209	0.0785351	0.202294	0.388222	0.697852	0.937796
hsa-miR-3692-3p	5.08848	0.481361	0.376737	1.27771	0.201352	NA
hsa-miR-423-5p	3264.11	-0.288266	0.200379	-1.4386	0.150263	0.597404
hsa-miR-542-5p	9.39992	0.377434	0.335333	1.12555	0.260356	0.735123
hsa-miR-1470	9.31351	-0.158191	0.351799	-0.449662	0.652954	0.922889
hsa-miR-7162-3p	885.858	-0.543392	0.258294	-2.10378	0.0353981	0.291152
hsa-miR-6737-5p	57.9324	0.191347	0.42076	0.454765	0.649278	0.92001
hsa-miR-549a	13.4448	-0.0389096	0.325652	-0.119482	0.904893	0.988534
hsa-miR-6505-3p	16.2845	0.135968	0.269879	0.503811	0.614394	0.91663
hsa-miR-136-3p	14653.4	-0.030582	0.151555	-0.201788	0.840083	0.984262
hsa-miR-519b-3p	1.88036	-0.0408375	0.422732	-0.0966037	0.923041	NA
hsa-miR-16-5p	28179.4	-0.102999	0.207716	-0.495865	0.61999	0.91663
hsa-miR-5195-5p	10.6709	0.799013	0.352504	2.26668	0.0234098	0.229028
hsa-miR-617	0.953041	-0.0552052	0.41483	-0.133079	0.894131	NA
hsa-miR-4303	2.59823	-0.584906	0.410049	-1.42643	0.153745	NA
hsa-miR-6816-5p	76.3724	-0.107561	0.38701	-0.277927	0.781068	0.970098
hsa-miR-6788-5p	0.458809	-0.019317	0.357319	-0.0540609	0.956887	NA
hsa-miR-3180	63.8765	0.206484	0.267454	0.772036	0.440093	0.855675
hsa-miR-4524a-5p	4.87509	-0.147717	0.398555	-0.370631	0.710912	NA
hsa-miR-28-5p	639.083	-0.00418463	0.174267	-0.0240127	0.980842	0.99391
hsa-miR-4654	5.34931	-0.12268	0.353273	-0.347268	0.72839	0.951704
hsa-miR-519d-3p	2.1339	-0.00314781	0.423974	-0.00742454	0.994076	NA
hsa-miR-4423-5p	3.25485	0.192609	0.410753	0.468917	0.639129	NA
hsa-miR-3174	4.12103	-0.624716	0.36973	-1.68965	0.0910942	NA
hsa-miR-3188	4.3643	-0.467087	0.399723	-1.16853	0.242594	NA
hsa-miR-1224-5p	427.641	0.226833	0.152809	1.48442	0.137699	0.578638
hsa-miR-17-5p	636.8	-0.096932	0.1926	-0.503281	0.614767	0.91663
hsa-miR-4262	371.093	1.18076	0.337998	3.49339	0.000476926	0.0159252
hsa-miR-6832-3p	2.0007	0.0175794	0.41908	0.0419476	0.96654	NA
hsa-miR-4763-3p	2.57455	-0.547217	0.404034	-1.35439	0.175613	NA
hsa-miR-6820-3p	4.02371	-0.0493648	0.384129	-0.128511	0.897744	NA
hsa-miR-3678-3p	4.0891	0.160444	0.394629	0.406569	0.684325	NA
hsa-miR-1206	135.181	0.618315	0.21771	2.84008	0.00451017	0.0699759
hsa-miR-8077	2.84712	-0.190452	0.424791	-0.448342	0.653906	NA
hsa-miR-4696	6.30197	0.0404776	0.346919	0.116678	0.907116	0.988534
hsa-miR-1972	67.4462	0.407902	0.282738	1.44269	0.149109	0.596435
hsa-miR-5008-5p	0.797549	0.23724	0.404385	0.586669	0.557426	NA
hsa-miR-1273h-5p	22.0065	0.164076	0.297163	0.552141	0.580852	0.900127
hsa-miR-363-5p	7.42028	0.0200252	0.359646	0.0556803	0.955596	0.99391
hsa-miR-6089	19.7793	-0.0124688	0.3322	-0.0375339	0.970059	0.99391
hsa-miR-3682-5p	2.32311	-0.209343	0.423069	-0.494819	0.620728	NA
hsa-miR-5585-5p	18.4619	-0.234447	0.315665	-0.742709	0.457658	0.873195
hsa-miR-6838-3p	13.1012	0.188674	0.338786	0.556913	0.577587	0.900127
hsa-miR-4293	8.40531	0.587093	0.359474	1.6332	0.102427	0.505876
hsa-miR-382-3p	603.957	0.248206	0.234517	1.05837	0.289885	0.762437
hsa-miR-555	14.5736	-0.694291	0.338244	-2.05263	0.0401082	0.308031
hsa-miR-4462	3.62559	0.188008	0.400263	0.469712	0.638561	NA
hsa-miR-4661-5p	3.99528	-0.256506	0.370299	-0.6927	0.488498	NA
hsa-miR-496	31.6108	0.236151	0.233559	1.0111	0.31197	0.783525
hsa-miR-625-5p	311.28	-0.164419	0.234248	-0.701904	0.482739	0.877728
hsa-miR-6763-5p	2.8347	0.247607	0.3923	0.631167	0.527931	NA
hsa-miR-409-3p	9768.06	-0.0588231	0.171594	-0.342804	0.731746	0.951704
hsa-miR-5100	107.217	-0.139502	0.330435	-0.422176	0.672897	0.929469
hsa-miR-6797-3p	1.91205	-0.0782637	0.412533	-0.189715	0.849532	NA
hsa-miR-4483	1.83185	-0.329464	0.415083	-0.793731	0.427352	NA
hsa-miR-3910	14.1941	-0.310832	0.301507	-1.03093	0.302575	0.777184
hsa-miR-4742-3p	17.9583	0.0587678	0.25332	0.231991	0.816545	0.979612
hsa-miR-29b-2-5p	199.293	0.0558028	0.189109	0.295082	0.767931	0.963625
hsa-miR-548ar-5p	10.1931	0.0152246	0.313592	0.0485489	0.961279	0.99391
hsa-miR-188-5p	28.5038	0.297644	0.22788	1.30614	0.191503	0.663994
hsa-miR-4268	8.36158	1.36377	0.362648	3.76058	0.000169517	0.00743935
hsa-miR-5094	106.464	0.0297526	0.328374	0.0906058	0.927806	0.99391
hsa-miR-4720-3p	2.52642	-0.467009	0.407922	-1.14485	0.252271	NA
hsa-miR-412-5p	67.0068	0.318917	0.422448	0.754926	0.450293	0.865645
hsa-miR-6857-5p	33.1307	0.342886	0.263653	1.30052	0.193422	0.664537
hsa-miR-194-5p	366.086	-0.243895	0.248114	-0.982998	0.325608	0.794298
hsa-miR-3157-3p	10.95	0.026407	0.301998	0.0874409	0.930321	0.99391
hsa-miR-30d-3p	340.315	-0.0530855	0.18804	-0.282309	0.777706	0.968334
hsa-miR-608	3.65718	-0.0849301	0.391354	-0.217016	0.828196	NA
hsa-miR-6079	8.18241	0.00719551	0.419048	0.0171711	0.9863	0.994965
hsa-miR-1273c	25.8447	0.386238	0.281004	1.37449	0.169288	0.637223
hsa-miR-6861-3p	5.97181	0.407395	0.364876	1.11653	0.264195	0.738501
hsa-miR-5011-3p	3.27893	-0.340718	0.410822	-0.829358	0.406902	NA
hsa-miR-374a-5p	607.536	0.0860178	0.195642	0.439669	0.660177	0.922889
hsa-miR-6071	80.9614	-0.158522	0.193205	-0.820485	0.41194	0.842089
hsa-miR-520e	0.38915	-0.0919639	0.344303	-0.267102	0.789391	NA
hsa-miR-5586-3p	14.8682	0.337006	0.344198	0.979106	0.327528	0.794298
hsa-miR-4763-5p	6.33665	-0.0626422	0.378543	-0.165482	0.868564	0.986697
hsa-miR-3672	0.611043	0.0313603	0.394018	0.0795911	0.936562	NA
hsa-miR-200b-3p	149.072	-0.620619	0.201267	-3.08356	0.00204537	0.040229
hsa-miR-4798-5p	5.3878	0.00650914	0.390864	0.0166532	0.986713	0.994965
hsa-miR-548ao-5p	8.88578	0.128274	0.314374	0.40803	0.683251	0.934254
hsa-miR-2113	34.2802	-0.14192	0.241229	-0.58832	0.556318	0.894054
hsa-miR-664b-3p	86.3847	0.0609715	0.197332	0.308979	0.757337	0.958748
hsa-miR-4703-3p	2.84781	-0.260599	0.421221	-0.618674	0.536131	NA
hsa-miR-6132	3.98658	-0.272057	0.377364	-0.72094	0.470946	NA
hsa-miR-3653-5p	833.93	-1.41273	0.296566	-4.76362	1.9015e-06	0.000265519
hsa-miR-7159-5p	0.912992	0.270939	0.419878	0.645282	0.518745	NA
hsa-let-7g-3p	236.19	0.099257	0.242002	0.41015	0.681696	0.934254
hsa-miR-548e-3p	51.9578	-0.678334	0.247804	-2.73738	0.00619311	0.0897417
hsa-miR-4725-3p	1.6564	0.108249	0.424698	0.254884	0.798813	NA
hsa-miR-548ar-3p	1.43191	-0.0152345	0.419964	-0.0362757	0.971063	NA
hsa-miR-6731-5p	1.17684	-0.0957282	0.410426	-0.233241	0.815574	NA
hsa-miR-7641	8.8296	-0.315823	0.38698	-0.816121	0.414431	0.843024
hsa-miR-4769-3p	3.39154	-0.208103	0.390152	-0.533389	0.593764	NA
hsa-miR-514b-3p	1.59892	-0.120051	0.42108	-0.285103	0.775565	NA
hsa-miR-574-5p	40.4581	0.503314	0.210922	2.38625	0.0170212	0.18781
hsa-miR-4485-5p	122.763	-0.452564	0.298765	-1.51478	0.129827	0.563798
hsa-miR-181b-3p	10.2797	-0.178572	0.317577	-0.562294	0.573915	0.898784
hsa-miR-4681	9.88991	0.305152	0.350852	0.869745	0.38444	0.833919
hsa-miR-3616-3p	2.73774	-0.472679	0.404102	-1.1697	0.242121	NA
hsa-miR-4751	12.6746	0.0809918	0.34812	0.232655	0.816029	0.979612
hsa-miR-152-3p	1559.87	-0.0999055	0.176245	-0.566856	0.570812	0.898537
hsa-miR-4722-3p	3.66406	0.633549	0.415548	1.52461	0.127356	NA
hsa-miR-4433a-3p	11.6492	0.246675	0.31176	0.791232	0.428809	0.846047
hsa-miR-222-3p	27172.5	-0.0696357	0.142494	-0.488694	0.625059	0.91663
hsa-miR-638	17.7953	-0.140173	0.355551	-0.394242	0.693402	0.936734
hsa-miR-182-3p	2.15909	0.0404247	0.417082	0.0969227	0.922788	NA
hsa-miR-939-3p	12.4537	-0.0112092	0.294737	-0.0380312	0.969663	0.99391
hsa-miR-450b-5p	44.4503	-0.145314	0.2696	-0.538997	0.589889	0.9008
hsa-miR-6869-3p	4.86082	-0.214644	0.379529	-0.565555	0.571697	NA
hsa-miR-3924	0.3357	0.386549	0.352229	1.09743	0.272451	NA
hsa-miR-1178-5p	5.04092	0.282911	0.386798	0.731419	0.464524	NA
hsa-miR-3187-5p	1.42717	-0.501896	0.421599	-1.19046	0.233866	NA
hsa-miR-3074-5p	9357.12	-0.424543	0.234409	-1.81112	0.0701218	0.420731
hsa-miR-514a-5p	0.24044	-0.116188	0.299114	-0.388441	0.69769	NA
hsa-miR-942-3p	11.3025	0.309992	0.29743	1.04224	0.297303	0.772347
hsa-miR-5684	13.2889	-0.220359	0.372891	-0.590947	0.554556	0.894054
hsa-miR-1236-5p	1.63551	0.22692	0.41898	0.5416	0.588094	NA
hsa-miR-1182	3.7555	-0.668376	0.403832	-1.65508	0.0979075	NA
hsa-miR-548ao-3p	8.1986	-0.0222677	0.37718	-0.0590374	0.952922	0.99391
hsa-miR-1273a	19.2346	0.39027	0.309539	1.26081	0.207378	0.684131
hsa-miR-7113-5p	3.97583	-0.281329	0.379279	-0.741746	0.458241	NA
hsa-miR-6796-5p	6.41056	0.23136	0.344649	0.671292	0.502035	0.879255
hsa-miR-1225-5p	30.2338	-1.01039	0.307923	-3.28129	0.00103332	0.0240134
hsa-miR-7109-5p	4.96492	0.134235	0.392263	0.342205	0.732196	NA
hsa-miR-449a	25.1043	-0.477007	0.359744	-1.32596	0.184852	0.662127
hsa-miR-503-3p	0.498226	-0.394139	0.348463	-1.13108	0.258021	NA
hsa-miR-4489	0.985798	0.318378	0.417708	0.762202	0.445939	NA
hsa-miR-4787-5p	78.0414	-0.499896	0.423604	-1.1801	0.23796	0.707578
hsa-miR-642b-5p	10.0561	0.578601	0.369184	1.56724	0.117058	0.545774
hsa-miR-668-3p	385.576	-0.329572	0.187607	-1.75672	0.0789661	0.442168
hsa-miR-4646-3p	38.7387	-0.160886	0.224074	-0.718003	0.472755	0.87722
hsa-miR-520g-3p	0.548765	-0.112834	0.384287	-0.293618	0.76905	NA
hsa-miR-331-5p	55.1364	-0.217515	0.202487	-1.07422	0.282725	0.755243
hsa-miR-767-5p	345.052	0.652705	0.186557	3.49869	0.000467557	0.0159252
hsa-miR-302a-3p	7.52588	0.333093	0.379338	0.87809	0.379895	0.833919
hsa-miR-378f	14.8816	-0.786687	0.274597	-2.86488	0.0041717	0.0660591
hsa-miR-30c-5p	42979.5	-0.382666	0.193533	-1.97727	0.0480113	0.338282
hsa-miR-548f-5p	4.97543	-0.156426	0.383972	-0.407389	0.683722	NA
hsa-miR-1304-3p	4.47412	0.0972786	0.391719	0.248337	0.803873	NA
hsa-miR-6827-3p	6.35918	0.126283	0.334511	0.377517	0.70579	0.940237
hsa-miR-6799-3p	3.12576	-0.293829	0.398242	-0.737815	0.460627	NA
hsa-miR-1252-3p	29.206	0.0227378	0.280482	0.0810666	0.935389	0.99391
hsa-miR-5703	3.22644	-0.0513659	0.389612	-0.131839	0.895112	NA
hsa-miR-3659	2.23304	0.415811	0.409917	1.01438	0.310402	NA
hsa-miR-143-3p	291815	0.11828	0.196772	0.601103	0.547772	0.893925
hsa-miR-891a-3p	2.10261	0.0620278	0.419803	0.147755	0.882536	NA
hsa-miR-4762-5p	9.29636	-0.0363173	0.338083	-0.107421	0.914455	0.988638
hsa-miR-6747-3p	48.5118	0.175625	0.318292	0.551773	0.581104	0.900127
hsa-miR-6511b-3p	215.905	0.149147	0.191534	0.778697	0.436158	0.851902
hsa-miR-302c-3p	0.77118	0.811038	0.388164	2.08942	0.0366697	NA
hsa-miR-6740-5p	1.50233	-0.180831	0.422985	-0.427513	0.669006	NA
hsa-miR-520d-3p	0.798262	-0.0463302	0.412274	-0.112377	0.910524	NA
hsa-miR-7977	18.7397	0.174156	0.26807	0.649667	0.515907	0.879255
hsa-miR-194-3p	2.34925	0.00380917	0.403656	0.00943668	0.992471	NA
hsa-miR-1289	8.16377	-0.0491764	0.31178	-0.157728	0.874671	0.987863
hsa-miR-4329	4.02394	0.165294	0.391186	0.422545	0.672627	NA
hsa-miR-584-3p	10.4481	0.327437	0.338821	0.966401	0.333844	0.797183
hsa-miR-24-3p	2514.81	-0.0539402	0.2349	-0.229631	0.818379	0.979612
hsa-miR-545-5p	9.5828	0.20765	0.293078	0.708515	0.478626	0.87729
hsa-miR-499a-5p	186.978	-0.225814	0.228451	-0.988454	0.32293	0.794298
hsa-miR-3664-5p	2.58009	0.0629033	0.402397	0.156321	0.87578	NA
hsa-miR-19a-3p	420.644	-0.4003	0.272773	-1.46752	0.142234	0.58259
hsa-miR-369-3p	1021.59	0.0309968	0.202257	0.153254	0.878198	0.988534
hsa-miR-34b-5p	58.3345	0.042269	0.268688	0.157316	0.874996	0.987863
hsa-miR-570-3p	6.71089	0.309219	0.359769	0.859493	0.390068	0.833919
hsa-miR-6782-3p	3.09662	0.417814	0.395558	1.05626	0.290848	NA
hsa-miR-5587-3p	11.6625	-0.332087	0.331939	-1.00045	0.317094	0.788117
hsa-miR-4454	2281.41	-0.353506	0.324918	-1.08799	0.276601	0.746213
hsa-miR-3135a	6.01198	-0.933298	0.338811	-2.75462	0.00587597	0.0876261
hsa-miR-3908	163.662	-1.48354	0.264045	-5.61853	1.92588e-08	4.93024e-06
hsa-miR-92b-5p	68.6486	0.200025	0.22918	0.872785	0.38278	0.833919
hsa-miR-1263	2.48463	-0.26297	0.413923	-0.635311	0.525226	NA
hsa-miR-548b-3p	17.1072	0.222016	0.278856	0.796164	0.425936	0.844179
hsa-miR-4283	6.18939	0.315369	0.339971	0.927636	0.353596	0.80847
hsa-miR-7854-3p	8.61638	0.410411	0.342767	1.19735	0.231171	0.700887
hsa-miR-6716-5p	2.01969	-0.497495	0.419486	-1.18596	0.235637	NA
hsa-miR-1261	25.4941	-0.0949684	0.351103	-0.270486	0.786786	0.971456
hsa-miR-3920	1.5586	-0.0993823	0.426304	-0.233125	0.815664	NA
hsa-miR-125b-5p	466854	-0.621084	0.203149	-3.05728	0.00223358	0.0428848
hsa-miR-6883-5p	0.981427	-0.0182641	0.420553	-0.0434286	0.96536	NA
hsa-miR-3120-5p	40.9801	-0.0206758	0.240436	-0.0859933	0.931472	0.99391
hsa-miR-500a-3p	1751.21	0.0175881	0.144205	0.121966	0.902926	0.988534
hsa-miR-330-3p	2911.33	-0.734473	0.208859	-3.5166	0.000437112	0.0152592
hsa-miR-3144-3p	2.34268	0.320319	0.408859	0.783447	0.433365	NA
hsa-miR-4666b	5.66014	-0.0429817	0.353095	-0.121728	0.903114	0.988534
hsa-miR-1825	8.78638	0.419799	0.319085	1.31563	0.188298	0.662127
hsa-miR-520b	1.62683	0.0488644	0.42089	0.116098	0.907575	NA
hsa-miR-5691	2.0513	0.109561	0.418402	0.261856	0.793432	NA
hsa-miR-6165	3.68406	-0.344572	0.39215	-0.878674	0.379578	NA
hsa-miR-512-5p	3.89665	0.348844	0.411258	0.848236	0.396306	NA
hsa-miR-127-3p	545442	0.0128774	0.168171	0.0765731	0.938963	0.99391
hsa-miR-4430	356.676	-0.221732	0.242195	-0.915513	0.359922	0.817631
hsa-miR-6808-3p	4.24975	-0.16974	0.371947	-0.456357	0.648134	NA
hsa-miR-25-5p	21.8004	0.170732	0.258684	0.660004	0.509251	0.879255
hsa-miR-3689a-5p	3.08374	-0.116331	0.417688	-0.278511	0.78062	NA
hsa-miR-1185-1-3p	38.7379	-0.0278879	0.246126	-0.113308	0.909787	0.988534
hsa-miR-4633-5p	0.462011	-0.324773	0.370161	-0.877384	0.380278	NA
hsa-miR-219b-5p	6009.69	-0.211014	0.309301	-0.682227	0.495095	0.878707
hsa-miR-4252	6.22627	-0.105817	0.350034	-0.302304	0.76242	0.959899
hsa-miR-99b-3p	663.943	0.102903	0.186421	0.551992	0.580954	0.900127
hsa-miR-6872-5p	11.2466	-0.648598	0.32549	-1.99268	0.0462965	0.333856
hsa-miR-889-5p	23.5383	0.226738	0.249122	0.910146	0.362746	0.818175
hsa-miR-4309	137.515	-0.488912	0.2838	-1.72273	0.0849371	0.449412
hsa-miR-4699-5p	1.6746	-0.00524862	0.418265	-0.0125485	0.989988	NA
hsa-miR-433-3p	3761.67	0.111589	0.170209	0.655603	0.51208	0.879255
hsa-miR-129-5p	9800.77	0.112769	0.228314	0.493922	0.621361	0.91663
hsa-miR-6805-5p	26.843	0.064179	0.340312	0.188589	0.850415	0.985837
hsa-miR-6777-5p	1.68933	-0.118443	0.416638	-0.284282	0.776194	NA
hsa-miR-6735-5p	13.2475	-0.144974	0.304528	-0.47606	0.634031	0.91663
hsa-miR-1268b	40.4919	0.171756	0.249467	0.688491	0.491143	0.878707
hsa-miR-937-5p	2.62766	-0.00567978	0.40639	-0.0139762	0.988849	NA
hsa-miR-3689f	1.74946	0.524081	0.413149	1.2685	0.204619	NA
hsa-miR-2117	2.50462	-0.240167	0.404845	-0.593233	0.553025	NA
hsa-miR-96-3p	0.926026	0.0587544	0.42068	0.139665	0.888925	NA
hsa-miR-5582-5p	17.3519	0.570039	0.415104	1.37324	0.169677	0.637223
hsa-miR-4776-5p	2.79972	-0.338217	0.418151	-0.808839	0.418608	NA
hsa-let-7a-3p	1029.46	-0.215403	0.213561	-1.00863	0.313154	0.783525
hsa-miR-5571-5p	22.7586	-0.0869721	0.290017	-0.299886	0.764264	0.959906
hsa-miR-875-5p	7.48672	0.0481581	0.336463	0.143131	0.886187	0.988534
hsa-miR-5688	12.2705	-0.0746016	0.338303	-0.220517	0.825469	0.979784
hsa-miR-301b-5p	0.913361	0.261254	0.418836	0.623763	0.532783	NA
hsa-miR-3591-3p	19.0325	-0.152342	0.252244	-0.603946	0.545879	0.892236
hsa-miR-4784	4.30789	-0.122236	0.399157	-0.306237	0.759424	NA
hsa-miR-130b-3p	509.195	-0.0838567	0.205892	-0.407284	0.683799	0.934254
hsa-miR-3658	1.14342	0.722464	0.417562	1.73019	0.0835955	NA
hsa-miR-3190-3p	2.12302	-0.0223239	0.417197	-0.0535092	0.957326	NA
hsa-miR-8086	0.457829	0.357269	0.379211	0.942138	0.346122	NA
hsa-miR-3944-3p	26.3245	-0.102128	0.35875	-0.284677	0.775892	0.967345
hsa-miR-1266-5p	10.5893	-0.109134	0.325264	-0.335525	0.737229	0.955599
hsa-miR-135b-5p	38.323	0.575171	0.258626	2.22395	0.0261518	0.239933
hsa-miR-3921	13.1254	-0.0655233	0.356435	-0.18383	0.854147	0.985837
hsa-miR-512-3p	6.17528	-0.0206063	0.3467	-0.0594355	0.952605	0.99391
hsa-miR-8065	0.75387	0.152251	0.410115	0.37124	0.710459	NA
hsa-miR-1255b-2-3p	4.24107	-0.501144	0.385267	-1.30077	0.193336	NA
hsa-miR-6508-3p	5.73179	-0.192064	0.342857	-0.560187	0.575352	0.899024
hsa-miR-32-5p	13.6914	0.467163	0.305488	1.52923	0.126207	0.557333
hsa-miR-550b-3p	40.9889	-0.321002	0.229904	-1.39625	0.16264	0.624538
hsa-miR-5087	0.669581	-0.369868	0.40469	-0.913953	0.360742	NA
hsa-miR-4447	12.7456	0.0784179	0.39569	0.19818	0.842904	0.985115
hsa-miR-3978	0.687429	0.0730325	0.39493	0.184925	0.853288	NA
hsa-miR-4724-3p	2.09505	-0.633487	0.424113	-1.49368	0.13526	NA
hsa-miR-9-3p	13985.3	-0.534107	0.222847	-2.39674	0.0165415	0.185907
hsa-miR-187-5p	4.94523	-0.2024	0.361078	-0.560544	0.575108	NA
hsa-miR-6130	4.48977	0.412925	0.395711	1.0435	0.296716	NA
hsa-miR-4661-3p	22.4417	0.348241	0.314132	1.10858	0.267611	0.741681
hsa-miR-4316	1.37614	-0.275536	0.422502	-0.652153	0.514302	NA
hsa-miR-3150b-5p	8.65765	0.58733	0.337605	1.7397	0.0819122	0.446913
hsa-miR-5579-3p	17.9184	-0.256478	0.316011	-0.81161	0.417015	0.843024
hsa-miR-1306-5p	42.6738	0.154402	0.22697	0.680274	0.496331	0.878707
hsa-miR-6748-5p	13.085	0.550605	0.334662	1.64526	0.0999165	0.498285
hsa-miR-520c-3p	0.716244	-0.0224255	0.395442	-0.0567101	0.954776	NA
hsa-miR-3621	154.809	-0.69468	0.419346	-1.65658	0.097605	0.493162
hsa-miR-1234-3p	11.7888	0.349055	0.286688	1.21754	0.223397	0.694636
hsa-miR-4320	1.48515	0.0878863	0.423794	0.20738	0.835713	NA
hsa-miR-6852-5p	149.071	-0.125431	0.261497	-0.479665	0.631465	0.91663
hsa-miR-329-5p	17.1475	-0.198966	0.246469	-0.807267	0.419513	0.843024
hsa-miR-627-5p	13.1911	0.108662	0.284144	0.382417	0.702152	0.939465
hsa-miR-1279	8.96503	0.0898282	0.395751	0.226982	0.820438	0.979612
hsa-miR-3679-5p	4.62326	-0.119842	0.357637	-0.335095	0.737554	NA
hsa-miR-4433b-5p	9.29754	0.570343	0.317841	1.79443	0.0727447	0.428477
hsa-miR-665	29.899	0.724348	0.257205	2.81623	0.00485906	0.0746351
hsa-miR-578	1.70789	-0.175702	0.416064	-0.422296	0.672809	NA
hsa-miR-125a-3p	111.988	-0.0860153	0.202118	-0.42557	0.670422	0.926883
hsa-miR-4439	9.6494	-0.491352	0.347801	-1.41274	0.157732	0.616479
hsa-miR-4266	24.3959	-1.16561	0.283365	-4.11345	3.89792e-05	0.00260313
hsa-miR-610	1.82731	0.16468	0.423726	0.388647	0.697537	NA
hsa-miR-3938	35.9685	-0.262116	0.24132	-1.08618	0.277401	0.746213
hsa-miR-431-5p	40.9065	-0.0665642	0.217973	-0.305379	0.760078	0.959761
hsa-miR-6891-3p	10.8265	0.468428	0.345568	1.35553	0.175248	0.644931
hsa-miR-5697	0.31778	0.202059	0.321271	0.628935	0.529392	NA
hsa-miR-3119	36.2238	-0.682331	0.31598	-2.15941	0.030818	0.270494
hsa-miR-3605-3p	79.2566	-0.454536	0.1801	-2.52379	0.0116096	0.143498
hsa-miR-3617-3p	5.7806	0.0370794	0.338095	0.109671	0.91267	0.988534
hsa-miR-548aj-3p	1.00804	-0.256887	0.419839	-0.61187	0.540624	NA
hsa-miR-6774-3p	4.66479	-0.3031	0.373576	-0.811347	0.417166	NA
hsa-miR-4643	0.381567	0.246818	0.324478	0.760662	0.446859	NA
hsa-miR-4732-5p	1.57708	-1.09038	0.424256	-2.57009	0.0101672	NA
hsa-let-7i-3p	204.363	-0.0330576	0.232123	-0.142414	0.886753	0.988534
hsa-miR-6837-5p	52.4444	0.60849	0.385672	1.57774	0.114626	0.54341
hsa-miR-4519	8.57625	-0.362864	0.331326	-1.09518	0.273436	0.743121
hsa-miR-6889-5p	2.0615	0.0693105	0.424327	0.163342	0.870249	NA
hsa-miR-6872-3p	3.17863	-0.0244478	0.395698	-0.061784	0.950735	NA
hsa-miR-4282	1.09882	-0.638268	0.412075	-1.54891	0.121403	NA
hsa-miR-451a	22700.2	0.340642	0.307242	1.10871	0.267555	0.741681
hsa-miR-487a-3p	1431.97	0.163866	0.174115	0.941135	0.346635	0.80847
hsa-miR-1204	0.6025	-0.214919	0.39633	-0.542273	0.587631	NA
hsa-miR-3929	8.45804	-0.205909	0.339283	-0.606896	0.54392	0.891834
hsa-miR-27b-3p	226291	-0.0697437	0.215465	-0.32369	0.746173	0.956135
hsa-miR-93-5p	3285.18	-0.125964	0.202262	-0.622776	0.533432	0.887704
hsa-miR-5681b	0.087577	-0.117173	0.193802	-0.604601	0.545444	NA
hsa-miR-155-5p	320.178	0.0534065	0.230397	0.231803	0.816691	0.979612
hsa-miR-4785	18.6929	-0.243688	0.319233	-0.763355	0.445252	0.859219
hsa-miR-8067	1.02652	0.0616481	0.392962	0.15688	0.875339	NA
hsa-miR-448	143.55	0.0549504	0.240263	0.228709	0.819095	0.979612
hsa-miR-3925-3p	0.886422	0.426674	0.420544	1.01458	0.310308	NA
hsa-miR-4632-3p	281.99	-0.730483	0.306203	-2.38562	0.0170505	0.18781
hsa-miR-4678	0.842006	0.437524	0.40437	1.08199	0.279257	NA
hsa-miR-6086	25.4209	-0.547928	0.33219	-1.64944	0.0990574	0.497229
hsa-miR-5685	12.9137	0.496988	0.325691	1.52595	0.127022	0.557333
hsa-miR-6841-3p	4.45243	-0.123308	0.366118	-0.3368	0.736268	NA
hsa-miR-552-3p	4.65295	0.507638	0.375527	1.3518	0.176439	NA
hsa-miR-4418	3.98398	0.29289	0.420795	0.69604	0.486404	NA
hsa-miR-4747-5p	5.27869	0.437465	0.395048	1.10737	0.268134	0.741681
hsa-miR-6818-5p	11.6605	-0.484112	0.313407	-1.54467	0.122425	0.551177
hsa-miR-671-5p	197.685	0.271741	0.183282	1.48264	0.13817	0.578638
hsa-miR-4788	101.783	0.975608	0.28114	3.47018	0.000520104	0.0169974
hsa-let-7a-2-3p	5.16898	0.279954	0.350995	0.797599	0.425103	NA
hsa-miR-548x-3p	1.53486	0.16993	0.423375	0.401369	0.688148	NA
hsa-miR-3657	2.27808	-0.335503	0.422966	-0.793216	0.427652	NA
hsa-miR-622	6.68571	0.647843	0.364335	1.77816	0.0753783	0.43691
hsa-miR-191-5p	195498	-0.148484	0.178667	-0.831065	0.405937	0.839192
hsa-miR-4501	4.68857	-0.277742	0.365682	-0.759516	0.447544	NA
hsa-miR-6802-3p	17.0062	0.290234	0.247616	1.17211	0.241152	0.712324
hsa-miR-1290	6.20839	0.650161	0.361708	1.79747	0.0722607	0.428477
hsa-miR-4775	24.2383	-1.0064	0.333872	-3.01434	0.00257539	0.0469275
hsa-miR-6775-3p	35.209	-0.0142413	0.243384	-0.0585136	0.95334	0.99391
hsa-miR-7114-3p	32.0095	0.227686	0.232809	0.977997	0.328076	0.794298
hsa-miR-520a-3p	1.5847	0.418631	0.421497	0.9932	0.320612	NA
hsa-miR-6780b-5p	0.474536	0.109339	0.379843	0.287853	0.773459	NA
hsa-miR-6885-3p	12.3179	-0.0638508	0.309816	-0.206093	0.836719	0.98332
hsa-miR-616-3p	8.7473	0.29705	0.346805	0.856533	0.391703	0.833919
hsa-miR-675-3p	6.60804	-0.2542	0.344018	-0.738914	0.459959	0.874378
hsa-miR-711	2.4572	0.209574	0.418266	0.501054	0.616333	NA
hsa-miR-1911-5p	10.0899	0.0499635	0.315901	0.158162	0.874329	0.987863
hsa-miR-6735-3p	5.56431	0.0767165	0.362946	0.211372	0.832597	0.981554
hsa-miR-616-5p	18.7985	-0.365309	0.27008	-1.3526	0.176185	0.644931
hsa-miR-509-3p	44.8385	-0.929572	0.299005	-3.10888	0.00187795	0.0374615
hsa-miR-5680	49.4112	-0.351762	0.259828	-1.35382	0.175792	0.644931
hsa-miR-4473	5.69036	0.122578	0.344823	0.355481	0.722229	0.949781
hsa-miR-561-3p	4.29238	0.198633	0.374237	0.530769	0.595579	NA
hsa-miR-149-3p	7.04644	0.201456	0.333692	0.60372	0.54603	0.892236
hsa-miR-6796-3p	121.901	0.881632	0.292801	3.01103	0.00260366	0.0469275
hsa-miR-3941	3.27646	-0.319705	0.416708	-0.767216	0.442953	NA
hsa-miR-6804-5p	4.12082	0.194907	0.372096	0.523808	0.600412	NA
hsa-miR-7852-3p	0.923936	0.0398723	0.415425	0.0959796	0.923537	NA
hsa-miR-7158-3p	40.5977	-0.575856	0.298879	-1.92672	0.0540145	0.35544
hsa-miR-3612	21.129	-0.830904	0.262891	-3.16064	0.00157424	0.0330514
hsa-miR-3913-3p	19.8603	-0.133193	0.267193	-0.49849	0.618139	0.91663
hsa-miR-4475	1.79939	0.0251924	0.425384	0.0592228	0.952775	NA
hsa-miR-5704	2.42687	-0.174241	0.408379	-0.426665	0.669624	NA
hsa-miR-379-3p	279.186	-0.0959383	0.167387	-0.573153	0.566541	0.896197
hsa-miR-1226-3p	146.588	-0.547045	0.249005	-2.19692	0.0280259	0.250278
hsa-miR-299-5p	222.447	-0.25596	0.212859	-1.20249	0.229175	0.697055
hsa-miR-4726-5p	15.2401	0.314664	0.367449	0.856346	0.391806	0.833919
hsa-miR-587	2.24328	0.115713	0.408893	0.282991	0.777184	NA
hsa-miR-208b-5p	0.453856	0.212005	0.365092	0.58069	0.561449	NA
hsa-miR-4315	10.6972	0.51065	0.400251	1.27583	0.202017	0.681975
hsa-miR-6894-5p	4.00511	-0.133311	0.403078	-0.330732	0.740847	NA
hsa-miR-1226-5p	4.05294	0.227085	0.394579	0.57551	0.564946	NA
hsa-miR-1229-5p	2.07777	-0.460244	0.424162	-1.08507	0.277892	NA
hsa-miR-4716-3p	9.06796	0.602338	0.399095	1.50926	0.131232	0.566215
hsa-miR-3154	0.261024	0.48821	0.319208	1.52944	0.126155	NA
hsa-miR-6793-5p	4.3794	-0.297939	0.366732	-0.812416	0.416553	NA
hsa-miR-30d-5p	97894.8	-0.11186	0.161432	-0.692921	0.488359	0.878707
hsa-miR-8081	5.57274	0.183025	0.36584	0.500288	0.616872	0.91663
hsa-miR-374c-3p	819.253	0.291563	0.229874	1.26836	0.20467	0.684131
hsa-miR-2681-3p	18.4274	-0.432167	0.280064	-1.5431	0.122806	0.551177
hsa-miR-151a-3p	27033.2	-0.188916	0.224364	-0.842008	0.399783	0.834331
hsa-miR-1207-3p	3.80502	0.630452	0.396018	1.59198	0.11139	NA
hsa-miR-4480	0.289565	0.0620329	0.348388	0.178057	0.858678	NA
hsa-miR-6810-5p	2.37388	-0.123744	0.411404	-0.300785	0.763578	NA
hsa-miR-6807-3p	4.28699	0.234272	0.412281	0.568233	0.569876	NA
hsa-miR-944	5.31074	0.363784	0.374486	0.971421	0.331339	0.794298
hsa-miR-425-5p	4063.13	-0.0691704	0.1794	-0.385565	0.699819	0.938725
hsa-miR-4799-3p	0.66711	-0.179132	0.402138	-0.445448	0.655996	NA
hsa-miR-6765-3p	21.7153	0.0736453	0.227296	0.324007	0.745933	0.956135
hsa-miR-3130-5p	3.11717	0.365253	0.413933	0.882398	0.377562	NA
hsa-miR-4324	413.24	-1.04065	0.282723	-3.68081	0.000232491	0.00939753
hsa-miR-6845-3p	4.43158	-0.364209	0.369138	-0.986647	0.323816	NA
hsa-miR-4300	44.0318	0.285881	0.356749	0.801351	0.422929	0.843024
hsa-miR-4458	3.36542	0.436345	0.41039	1.06324	0.287671	NA
hsa-miR-5581-5p	19.3334	0.423587	0.389902	1.08639	0.277305	0.746213
hsa-miR-890	1.68955	-0.282316	0.421651	-0.669549	0.503145	NA
hsa-miR-3667-3p	6.84683	-0.237134	0.377891	-0.627518	0.53032	0.886074
hsa-miR-4491	0.910073	-0.379803	0.408516	-0.929714	0.352519	NA
hsa-miR-4772-3p	1.39525	0.10848	0.42234	0.256855	0.797291	NA
hsa-let-7f-2-3p	1.7163	-0.233044	0.423635	-0.550105	0.582247	NA
hsa-miR-4999-3p	8.97611	0.0193258	0.362993	0.0532401	0.957541	0.99391
hsa-miR-2114-3p	5.05543	0.37606	0.356993	1.05341	0.292154	NA
hsa-miR-1272	1.392	-0.226149	0.420957	-0.537226	0.591111	NA
hsa-miR-613	0.263578	0.244043	0.322166	0.757507	0.448746	NA
hsa-miR-370-5p	35.6743	0.139289	0.215361	0.64677	0.517781	0.879255
hsa-miR-320e	57.1992	0.549658	0.247974	2.21659	0.0266508	0.240798
hsa-miR-548j-5p	2.76229	-0.426832	0.416891	-1.02385	0.305907	NA
hsa-miR-6718-5p	5.95471	-1.07953	0.360888	-2.99132	0.00277778	0.0476738
hsa-miR-7152-3p	19.8885	0.0311724	0.386936	0.0805621	0.93579	0.99391
hsa-miR-135a-3p	0.772194	0.222013	0.412987	0.537578	0.590868	NA
hsa-miR-3613-3p	0.0438555	0.0686209	0.194115	0.353507	0.723709	NA
hsa-miR-6801-5p	2.89974	-0.281391	0.413342	-0.68077	0.496017	NA
hsa-miR-6729-3p	53.5581	0.0338697	0.394988	0.0857487	0.931666	0.99391
hsa-miR-7155-5p	1.98662	-0.820302	0.417005	-1.96713	0.0491685	NA
hsa-miR-367-3p	0.09992	0.136188	0.199441	0.68285	0.494702	NA
hsa-miR-193a-5p	155.142	0.238438	0.190239	1.25336	0.210075	0.686004
hsa-miR-4781-5p	13.472	-0.113893	0.311825	-0.365248	0.714926	0.943026
hsa-miR-183-3p	1.14599	0.102271	0.421144	0.24284	0.808129	NA
hsa-miR-4710	2.77332	-0.506959	0.414367	-1.22345	0.221159	NA
hsa-miR-5091	6.69862	0.256004	0.355596	0.71993	0.471568	0.87722
hsa-miR-372-3p	7.42224	1.04541	0.424272	2.464	0.0137396	0.163597
hsa-miR-1538	24.8447	-0.363229	0.321646	-1.12928	0.258779	0.735123
hsa-miR-6785-3p	50.5632	-0.549721	0.365605	-1.50359	0.132686	0.570884
hsa-miR-6886-3p	3.34274	0.757845	0.405423	1.86927	0.0615851	NA
hsa-miR-6810-3p	16.0134	0.0865351	0.267553	0.323431	0.746369	0.956135
hsa-miR-552-5p	14.3961	0.449658	0.308388	1.45809	0.144815	0.588483
hsa-miR-646	4.8958	0.205894	0.365663	0.563071	0.573387	NA
hsa-miR-494-5p	1.36289	-0.614291	0.422547	-1.45378	0.146007	NA
hsa-miR-144-3p	718.96	0.201684	0.296323	0.68062	0.496112	0.878707
hsa-miR-6760-5p	1.65667	-0.139731	0.423399	-0.330022	0.741383	NA
hsa-miR-769-5p	61147.6	0.0395647	0.144376	0.27404	0.784054	0.970458
hsa-miR-326	1539.93	0.514357	0.230043	2.23592	0.0253569	0.239933
hsa-miR-346	606.653	-0.0376234	0.190019	-0.197998	0.843047	0.985115
hsa-miR-4532	3477.25	-0.044077	0.357043	-0.12345	0.901751	0.988534
hsa-miR-6879-3p	26.7316	-0.22362	0.29615	-0.755091	0.450194	0.865645
hsa-miR-3161	78.161	0.608065	0.338206	1.79792	0.0721904	0.428477
hsa-miR-1276	19.5021	-0.128478	0.280073	-0.458731	0.646427	0.919363
hsa-miR-33b-5p	509.085	0.315869	0.268225	1.17762	0.238946	0.707594
hsa-miR-3151-3p	1.78435	0.0907393	0.42393	0.214043	0.830513	NA
hsa-miR-499b-5p	4.0235	-0.0942695	0.39215	-0.240392	0.810027	NA
hsa-miR-4774-5p	2.5001	-0.543239	0.413236	-1.3146	0.188645	NA
hsa-miR-4685-5p	2.17508	-0.0172596	0.41604	-0.0414854	0.966909	NA
hsa-miR-6513-3p	2.25087	-0.163255	0.419781	-0.388906	0.697346	NA
hsa-miR-222-5p	6.35556	0.106783	0.344171	0.310262	0.756362	0.958748
hsa-miR-642a-3p	8.13298	-0.207733	0.356887	-0.58207	0.560519	0.894054
hsa-miR-548t-3p	2.31416	-0.372424	0.406306	-0.91661	0.359347	NA
hsa-miR-514a-3p	11.7769	-0.296143	0.360123	-0.822339	0.410884	0.842089
hsa-miR-378b	5.19831	-0.487233	0.386624	-1.26022	0.207589	0.684131
hsa-miR-6860	4.24187	0.102422	0.383851	0.266827	0.789602	NA
hsa-miR-1273f	12.8394	-0.127743	0.3984	-0.320641	0.748482	0.95726
hsa-miR-1278	0.642718	0.163674	0.407361	0.401792	0.687837	NA
hsa-miR-601	7.95925	-0.761708	0.39003	-1.95295	0.050826	0.344274
hsa-miR-4652-5p	0.503835	0.184298	0.345367	0.533628	0.593599	NA
hsa-miR-6502-3p	5.74284	-0.999604	0.385477	-2.59316	0.00950979	0.122748
hsa-miR-7-1-3p	415.579	-0.0289706	0.236845	-0.122319	0.902647	0.988534
hsa-miR-5590-5p	11.7765	0.0127569	0.311572	0.0409436	0.967341	0.99391
hsa-miR-518e-3p	0.776275	-0.179328	0.406857	-0.440764	0.659384	NA
hsa-miR-342-3p	13545.9	-0.17555	0.194976	-0.900369	0.367924	0.823807
hsa-miR-8076	0.907983	-0.258262	0.399513	-0.646442	0.517993	NA
hsa-miR-548ad-3p	4.20995	0.00469391	0.400052	0.0117332	0.990638	NA
hsa-miR-6083	1.97542	-0.35296	0.416007	-0.848447	0.396189	NA
hsa-miR-765	8.64531	0.0418154	0.320537	0.130454	0.896207	0.988534
hsa-miR-4753-3p	5.59388	-0.441114	0.364616	-1.2098	0.226354	0.695934
hsa-miR-3164	10.4412	-0.404722	0.334867	-1.20861	0.226814	0.695934
hsa-miR-10b-3p	0.0211489	0.0408698	0.193299	0.211434	0.832549	NA
hsa-miR-6516-3p	40.9227	-0.101711	0.251446	-0.404504	0.685842	0.934742
hsa-miR-6763-3p	46.9543	-0.107211	0.278241	-0.385317	0.700002	0.938725
hsa-miR-7111-5p	2.57392	0.14657	0.402716	0.363953	0.715893	NA
hsa-miR-3927-5p	1.31691	-0.0575375	0.424031	-0.135692	0.892065	NA
hsa-miR-210-5p	75.235	-0.0925978	0.226867	-0.408159	0.683157	0.934254
hsa-miR-153-5p	190.453	-0.0969095	0.238314	-0.406646	0.684268	0.934254
hsa-miR-4718	6.99213	-0.0961801	0.40118	-0.239743	0.81053	0.979612
hsa-miR-4310	7.20838	-0.151015	0.411605	-0.366893	0.713698	0.943026
hsa-miR-5191	35.7838	-0.515478	0.24124	-2.13678	0.0326158	0.278321
hsa-miR-3691-3p	2.6039	-0.0182843	0.403867	-0.0452731	0.96389	NA
hsa-miR-6826-5p	110.668	-1.47076	0.334622	-4.39528	1.1063e-05	0.00106205
hsa-miR-7845-5p	4.58271	0.244426	0.39311	0.621776	0.534089	NA
hsa-miR-518f-3p	0.966064	0.343918	0.421771	0.815414	0.414835	NA
hsa-miR-548ap-3p	89.5344	-0.188549	0.210845	-0.894255	0.371186	0.82582
hsa-miR-6822-5p	425.16	-0.958278	0.289122	-3.31445	0.000918246	0.0223877
hsa-miR-490-3p	959.334	-0.0217935	0.196461	-0.110931	0.911671	0.988534
hsa-miR-128-1-5p	188.315	-0.257517	0.21831	-1.17959	0.238163	0.707578
hsa-miR-2114-5p	12.797	0.318349	0.268522	1.18556	0.235796	0.707199
hsa-miR-4700-5p	3.43327	0.119402	0.397021	0.300744	0.763609	NA
hsa-miR-4436b-5p	6.83142	0.513244	0.358854	1.43023	0.152651	0.602754
hsa-miR-3663-5p	1.11773	0.255547	0.417799	0.611652	0.540768	NA
hsa-miR-3682-3p	2.12519	0.191245	0.420168	0.455162	0.648992	NA
hsa-miR-4540	2.32274	-0.36353	0.421382	-0.862709	0.388297	NA
hsa-miR-155-3p	3.49745	0.239139	0.419403	0.570189	0.56855	NA
hsa-miR-634	90.5388	0.626751	0.424117	1.47778	0.139467	0.581363
hsa-miR-3928-3p	40.4302	0.0463157	0.207293	0.223431	0.8232	0.979612
hsa-miR-3064-5p	8.58179	0.146599	0.308563	0.475101	0.634715	0.91663
hsa-miR-3136-5p	0.396367	0.473919	0.360073	1.31618	0.188115	NA
hsa-miR-5193	90.9946	1.26958	0.259844	4.88593	1.02943e-06	0.000175689
hsa-miR-7161-3p	1.93797	-0.306143	0.417789	-0.732769	0.463699	NA
hsa-miR-432-3p	89.3719	0.0813248	0.188577	0.431255	0.666283	0.925073
hsa-miR-4743-5p	2.64703	0.539342	0.403498	1.33667	0.181331	NA
hsa-miR-6501-5p	2.92017	0.0774005	0.395889	0.19551	0.844993	NA
hsa-miR-4789-3p	19.8552	0.254096	0.374497	0.678499	0.497455	0.878707
hsa-miR-100-5p	381288	-0.531235	0.210663	-2.52173	0.0116779	0.143498
hsa-miR-564	4.60631	-0.279128	0.387421	-0.720477	0.471232	NA
hsa-miR-3687	17.3926	0.105716	0.36909	0.286425	0.774553	0.966461
hsa-miR-3185	13.9787	0.067699	0.381824	0.177304	0.85927	0.986338
hsa-miR-6794-5p	10.0233	0.385157	0.316567	1.21667	0.22373	0.694636
hsa-miR-3158-5p	21.2256	0.134669	0.248705	0.541482	0.588176	0.9008
hsa-miR-8082	2.04903	0.00425236	0.423602	0.0100386	0.991991	NA
hsa-miR-606	18.2276	0.362485	0.312956	1.15826	0.246757	0.721861
hsa-miR-620	0.704548	0.00517426	0.39007	0.013265	0.989416	NA
hsa-miR-218-1-3p	1.96041	0.117969	0.41969	0.281085	0.778645	NA
hsa-miR-378g	44.4234	0.0122587	0.23228	0.0527757	0.957911	0.99391
hsa-miR-4676-5p	1.14188	0.219993	0.420919	0.522651	0.601217	NA
hsa-miR-550a-5p	12.2019	-0.291446	0.305285	-0.954669	0.339745	0.800426
hsa-miR-3619-5p	3.62753	0.349416	0.385802	0.905689	0.365101	NA
hsa-miR-6125	3.75807	-0.0372673	0.391371	-0.0952222	0.924138	NA
hsa-miR-5699-3p	14.0776	-0.189437	0.296663	-0.638558	0.52311	0.881429
hsa-miR-1299	49.9558	-0.707715	0.401855	-1.76112	0.0782183	0.442168
hsa-miR-4648	4.84903	0.120525	0.365088	0.330127	0.741304	NA
hsa-miR-380-3p	370.704	0.339823	0.146851	2.31407	0.0206639	0.20822
hsa-miR-4794	1.75964	0.180237	0.423053	0.426038	0.67008	NA
hsa-miR-1260a	23.73	-0.0455289	0.272637	-0.166995	0.867374	0.986697
hsa-miR-3665	2.8587	-0.161275	0.421454	-0.382663	0.70197	NA
hsa-miR-1914-3p	8.33238	0.182807	0.365127	0.500667	0.616606	0.91663
hsa-miR-1244	1.27687	-0.0158618	0.425495	-0.0372784	0.970263	NA
hsa-miR-6077	2.0034	-0.193887	0.420068	-0.461561	0.644397	NA
hsa-miR-4689	1.58779	-0.0994703	0.423274	-0.235002	0.814207	NA
hsa-miR-875-3p	4.79069	0.848479	0.407329	2.08303	0.0372486	NA
hsa-miR-4297	0.95214	0.180507	0.40618	0.444402	0.656752	NA
hsa-miR-5196-3p	94.9089	-1.23106	0.317899	-3.87248	0.000107735	0.00585374
hsa-miR-193b-3p	1114.44	0.346994	0.200018	1.73482	0.082773	0.446913
hsa-miR-6072	7.11294	0.700849	0.40924	1.71256	0.0867929	0.456287
hsa-miR-4272	7.23779	0.134559	0.344214	0.390918	0.695858	0.937374
hsa-miR-933	1.58979	-0.344285	0.417486	-0.824662	0.409563	NA
hsa-miR-658	0.18173	0.330371	0.274221	1.20476	0.228295	NA
hsa-miR-7106-3p	3.11127	-0.297279	0.405458	-0.733194	0.46344	NA
hsa-miR-580-3p	13.5036	-0.197458	0.288733	-0.683877	0.494053	0.878707
hsa-miR-4639-5p	5.59004	-0.197864	0.367185	-0.538869	0.589977	0.9008
hsa-miR-454-3p	1436.77	-0.328531	0.215222	-1.52647	0.126893	0.557333
hsa-miR-500b-3p	17.2199	-0.277865	0.253925	-1.09428	0.273832	0.743121
hsa-miR-7847-3p	4.73734	-0.277015	0.409961	-0.675711	0.499224	NA
hsa-miR-3149	2.03283	-0.0305473	0.416707	-0.0733064	0.941562	NA
hsa-miR-3117-5p	32.4622	-0.115366	0.356017	-0.324047	0.745902	0.956135
hsa-miR-4276	2.42866	0.267347	0.424446	0.629874	0.528777	NA
hsa-miR-7703	1.6247	0.258958	0.422723	0.612594	0.540145	NA
hsa-miR-491-3p	42.4324	0.159822	0.230653	0.69291	0.488366	0.878707
hsa-miR-596	1.72447	-0.0264347	0.422212	-0.0626099	0.950077	NA
hsa-miR-4477b	2.22161	-0.278616	0.407874	-0.683094	0.494548	NA
hsa-miR-6781-3p	107.848	-0.306474	0.225637	-1.35826	0.17438	0.644931
hsa-miR-4424	9.90267	0.564597	0.305071	1.85071	0.0642117	0.400932
hsa-miR-216b-3p	0.485815	-0.340806	0.375838	-0.90679	0.364518	NA
hsa-miR-4260	7.15186	0.363365	0.354512	1.02497	0.305377	0.778936
hsa-miR-338-5p	172.238	-0.0443663	0.200219	-0.221588	0.824634	0.979612
hsa-miR-874-5p	346.187	0.227551	0.202877	1.12162	0.262025	0.737126
hsa-miR-106a-3p	7.70484	-0.204347	0.347504	-0.588043	0.556504	0.894054
hsa-miR-7973	4.41182	0.099613	0.393499	0.253147	0.800155	NA
hsa-miR-548av-3p	66.2657	-0.0493957	0.22987	-0.214885	0.829857	0.981263
hsa-miR-6828-5p	4.6724	0.119744	0.358915	0.333629	0.73866	NA
hsa-miR-575	11.4133	0.122712	0.349084	0.351526	0.725194	0.951704
hsa-miR-183-5p	235.319	0.407059	0.259592	1.56807	0.116865	0.545774
hsa-miR-381-3p	7155.4	0.331116	0.157267	2.10543	0.0352536	0.291152
hsa-miR-4735-5p	0.874597	0.0101055	0.405435	0.0249251	0.980115	NA
hsa-miR-652-3p	1505.69	0.137319	0.170734	0.804285	0.421232	0.843024
hsa-miR-6769a-3p	36.4718	1.13393	0.318377	3.56159	0.000368619	0.0131674
hsa-miR-6848-5p	6.26895	0.165272	0.368652	0.448313	0.653927	0.922889
hsa-miR-6833-3p	13.9721	0.189889	0.276342	0.687152	0.491987	0.878707
hsa-miR-6756-5p	3.50332	-0.371319	0.42002	-0.884051	0.376669	NA
hsa-miR-1251-3p	3.12387	0.251657	0.393357	0.639767	0.522324	NA
hsa-miR-4672	5.22178	-0.326352	0.391851	-0.832847	0.404931	0.839127
hsa-miR-3935	1.98579	-0.251843	0.42455	-0.5932	0.553047	NA
hsa-miR-452-5p	21.3842	-0.120996	0.253873	-0.4766	0.633647	0.91663
hsa-miR-548au-5p	26.9947	0.023188	0.278918	0.0831358	0.933744	0.99391
hsa-miR-2116-3p	9.23324	-0.608846	0.294715	-2.06588	0.0388397	0.300773
hsa-miR-4646-5p	1.69964	0.157645	0.417301	0.377772	0.7056	NA
hsa-miR-1237-5p	46.0887	0.482947	0.387777	1.24543	0.212975	0.688695
hsa-miR-1292-3p	407.495	-0.625167	0.277827	-2.2502	0.0244362	0.236789
hsa-let-7c-5p	87824.2	0.0446577	0.152716	0.292423	0.769963	0.964652
hsa-miR-934	0.327335	-0.153	0.323023	-0.473649	0.63575	NA
hsa-miR-1271-3p	4.11941	-0.0671867	0.371818	-0.180698	0.856605	NA
hsa-miR-1269b	9.10151	-0.146381	0.370933	-0.394629	0.693117	0.936734
hsa-miR-4419a	5.77283	-0.213093	0.337297	-0.631766	0.52754	0.884689
hsa-miR-4284	85567	-0.990196	0.330831	-2.99305	0.002762	0.0476738
hsa-miR-302c-5p	1.59131	0.498462	0.412482	1.20845	0.226875	NA
hsa-miR-6787-3p	4.58929	-0.100571	0.402975	-0.249571	0.802919	NA
hsa-miR-3145-5p	15.9809	0.422701	0.302228	1.39862	0.161928	0.623363
hsa-miR-548y	1.82321	0.280037	0.424608	0.659518	0.509563	NA
hsa-miR-6515-5p	3.1964	-0.646744	0.418563	-1.54515	0.122309	NA
hsa-miR-4782-3p	1.10013	-0.427721	0.412666	-1.03648	0.299977	NA
hsa-miR-7855-5p	2.546	-0.241666	0.400241	-0.603801	0.545976	NA
hsa-miR-1205	11.8155	-0.939228	0.347429	-2.70337	0.0068641	0.0970492
hsa-miR-4445-5p	0.393642	0.394919	0.34682	1.13869	0.254834	NA
hsa-miR-4511	1.28712	-0.320589	0.423954	-0.756188	0.449536	NA
hsa-miR-124-3p	56756.1	-0.151732	0.176387	-0.860222	0.389667	0.833919
hsa-miR-455-3p	199.706	-0.0801004	0.289525	-0.276662	0.78204	0.970285
hsa-miR-3173-3p	2.00995	-0.19218	0.407059	-0.472119	0.636842	NA
hsa-miR-5188	4.15646	-0.117052	0.380807	-0.307378	0.758556	NA
hsa-miR-139-5p	9195.84	0.329867	0.165136	1.99755	0.0457655	0.333155
hsa-miR-486-5p	24404.9	0.0142803	0.288494	0.0494995	0.960521	0.99391
hsa-miR-7978	14.553	0.0482083	0.304245	0.158452	0.8741	0.987863
hsa-miR-190b	17.8095	-0.0480484	0.26019	-0.184666	0.853491	0.985837
hsa-miR-501-5p	38.5395	-0.0457632	0.261488	-0.175011	0.861071	0.986338
hsa-miR-5693	7.53304	0.0765423	0.389229	0.196651	0.844101	0.985115
hsa-miR-6749-5p	5.18186	-0.56895	0.374366	-1.51977	0.128568	NA
hsa-miR-4419b	9.61261	0.0192056	0.30491	0.0629876	0.949776	0.99391
hsa-miR-219a-2-3p	3917.9	-0.256508	0.305689	-0.839115	0.401405	0.835444
hsa-miR-4727-5p	1.71524	0.0344146	0.420639	0.0818151	0.934794	NA
hsa-miR-6890-3p	6.76365	-0.391017	0.377864	-1.03481	0.300758	0.776039
hsa-miR-96-5p	24.1809	-0.436139	0.293729	-1.48483	0.137588	0.578638
hsa-miR-99b-5p	386260	-0.369005	0.201138	-1.83459	0.0665666	0.407823
hsa-miR-551b-3p	204.68	0.617894	0.233854	2.64221	0.00823658	0.111959
hsa-miR-3607-3p	506.036	0.226345	0.294626	0.768244	0.442342	0.858961
hsa-miR-5707	1.69604	-0.0933435	0.419948	-0.222274	0.824101	NA
hsa-miR-6090	8.73293	-0.297066	0.30336	-0.979255	0.327454	0.794298
hsa-miR-770-5p	984.932	0.0628689	0.16108	0.390296	0.696317	0.937374
hsa-miR-3162-3p	4.15605	-0.100069	0.379368	-0.263779	0.79195	NA
hsa-miR-6503-5p	8.27677	0.135595	0.3711	0.365386	0.714823	0.943026
hsa-miR-4422	4.03464	0.292265	0.379251	0.770638	0.440921	NA
hsa-miR-4803	5.13004	-0.143309	0.400987	-0.357391	0.720799	NA
hsa-miR-9-5p	187682	-0.155112	0.174563	-0.888577	0.374231	0.829268
hsa-miR-593-5p	8.69808	0.207511	0.360251	0.576016	0.564604	0.894054
hsa-miR-3617-5p	6.91555	0.685305	0.364243	1.88145	0.0599107	0.380425
hsa-miR-141-5p	1.94156	0.0491979	0.416599	0.118094	0.905993	NA
hsa-miR-4291	7.63572	-0.256895	0.323204	-0.794838	0.426708	0.844617
hsa-miR-361-3p	1680.07	-0.144458	0.180306	-0.801179	0.423028	0.843024
hsa-miR-3146	0.258336	-0.0753784	0.304605	-0.247463	0.80455	NA
hsa-miR-382-5p	958.2	0.0719024	0.182774	0.393396	0.694027	0.936754
hsa-miR-4757-5p	4.9521	0.515482	0.386716	1.33297	0.182541	NA
hsa-miR-6073	1.62635	0.281013	0.419595	0.669724	0.503033	NA
hsa-miR-203a-3p	270.265	-0.782361	0.300697	-2.60182	0.00927303	0.121738
hsa-miR-1249-3p	2024.25	0.519123	0.212051	2.44811	0.0143609	0.167109
hsa-miR-15b-3p	14.9841	0.0456434	0.263334	0.173329	0.862393	0.986338
hsa-miR-340-3p	1197.74	-0.303247	0.208608	-1.45367	0.146038	0.588483
hsa-miR-4534	0.82925	-0.379833	0.410239	-0.925883	0.354507	NA
hsa-miR-518c-3p	1.64815	-0.228652	0.417778	-0.547305	0.584169	NA
hsa-miR-376c-5p	1.80601	0.0755063	0.42379	0.178169	0.85859	NA
hsa-let-7d-5p	14404.6	-0.343622	0.195555	-1.75716	0.0788908	0.442168
hsa-miR-212-5p	3443.04	-0.893126	0.215006	-4.15395	3.26781e-05	0.00239017
hsa-miR-6798-5p	12.6991	0.333821	0.304005	1.09808	0.27217	0.742834
hsa-miR-649	1.24806	-0.2357	0.423008	-0.557201	0.57739	NA
hsa-miR-8087	3.14813	-0.342339	0.411263	-0.832411	0.405177	NA
hsa-miR-548n	10.7144	0.450723	0.332103	1.35718	0.174725	0.644931
hsa-miR-4797-3p	6.58197	0.467239	0.371459	1.25785	0.208446	0.684131
hsa-miR-4742-5p	7.55782	-1.00658	0.337075	-2.98623	0.00282443	0.0476738
hsa-miR-483-5p	19.7313	0.078199	0.286535	0.272913	0.78492	0.970723
hsa-miR-410-5p	10.814	-0.196958	0.319033	-0.617361	0.536996	0.889158
hsa-miR-520d-5p	5.99222	0.0914093	0.353542	0.258553	0.79598	0.977595
hsa-miR-497-3p	1.40554	-0.198269	0.42217	-0.469643	0.63861	NA
hsa-miR-4482-3p	3.5647	0.391053	0.415734	0.940633	0.346893	NA
hsa-miR-1275	116.013	0.430509	0.292176	1.47346	0.140628	0.582223
hsa-miR-23b-5p	13.9557	-0.656708	0.312882	-2.0989	0.0358254	0.291152
hsa-miR-4701-3p	7.37243	-0.313703	0.355276	-0.882983	0.377246	0.83374
hsa-miR-588	1.53261	-0.100677	0.419938	-0.239743	0.81053	NA
hsa-miR-3065-5p	2520.33	-0.194789	0.293574	-0.663509	0.507005	0.879255
hsa-miR-6866-5p	23.5092	-0.0539337	0.240474	-0.224281	0.822539	0.979612
hsa-miR-519c-5p	0.545537	0.0480837	0.386783	0.124317	0.901064	NA
hsa-miR-3973	11.2061	-1.00071	0.315406	-3.17278	0.00150988	0.0322108
hsa-miR-202-5p	0.14358	0.000689953	0.251613	0.00274211	0.997812	NA
hsa-miR-1270	24.8193	0.342944	0.312382	1.09784	0.272276	0.742834
hsa-miR-6509-5p	2.33568	0.0257227	0.41058	0.0626497	0.950045	NA
hsa-miR-4695-3p	1.58533	0.343734	0.423058	0.812499	0.416505	NA
hsa-miR-6731-3p	1.85458	-0.18841	0.422341	-0.446108	0.655519	NA
hsa-miR-4436a	3.28076	-0.195869	0.412938	-0.474331	0.635264	NA
hsa-miR-5194	7.63373	-0.159946	0.326284	-0.490203	0.62399	0.91663
hsa-miR-4694-3p	2.32491	0.0567116	0.418842	0.135401	0.892295	NA
hsa-miR-3139	23.7102	0.487525	0.317539	1.53532	0.124704	0.555205
hsa-miR-6870-5p	4.27364	0.523943	0.404696	1.29466	0.195439	NA
hsa-miR-647	3.63261	-0.68814	0.393715	-1.74781	0.0804965	NA
hsa-miR-892a	11.0497	0.0185383	0.347961	0.053277	0.957511	0.99391
hsa-miR-3945	2.51338	0.151883	0.411227	0.369341	0.711873	NA
hsa-miR-29a-3p	24207.8	-0.186929	0.225807	-0.827827	0.407769	0.841663
hsa-miR-6831-5p	1.17684	0.0717747	0.422167	0.170015	0.864998	NA
hsa-miR-518d-3p	1.18236	-0.200953	0.419919	-0.478551	0.632258	NA
hsa-miR-4762-3p	1150.77	-0.851779	0.310902	-2.73971	0.0061494	0.0897417
hsa-miR-1181	189.535	0.527637	0.245682	2.14764	0.031742	0.274164
hsa-miR-377-3p	592.85	0.035	0.23866	0.146652	0.883407	0.988534
hsa-miR-3911	1.39016	-0.0428998	0.424891	-0.100967	0.919577	NA
hsa-miR-23a-5p	4.99123	-0.502746	0.365991	-1.37366	0.169548	NA
hsa-miR-4527	43.7327	-0.034631	0.245744	-0.140923	0.887931	0.988534
hsa-miR-1294	6.23264	-0.268724	0.343768	-0.781703	0.434389	0.851048
hsa-miR-3943	471.104	0.142116	0.232379	0.611568	0.540823	0.891177
hsa-miR-642a-5p	21.7177	0.0764408	0.283456	0.269674	0.787411	0.971456
hsa-miR-2278	3.43285	0.215049	0.394675	0.544876	0.585839	NA
hsa-miR-4522	0.880827	-0.126296	0.416886	-0.30295	0.761928	NA
hsa-miR-1295b-3p	1.05452	-0.0783456	0.421178	-0.186015	0.852433	NA
hsa-miR-574-3p	1479.78	-0.117389	0.260932	-0.449882	0.652795	0.922889
hsa-miR-3927-3p	0.277999	0.164769	0.310083	0.531371	0.595161	NA
hsa-miR-193a-3p	41.2288	0.791962	0.272871	2.90233	0.00370399	0.0598876
hsa-miR-4685-3p	18.829	0.340277	0.250642	1.35762	0.174584	0.644931
hsa-miR-4515	4.30625	-0.323505	0.393204	-0.822741	0.410655	NA
hsa-miR-136-5p	444.313	0.287801	0.24874	1.15704	0.247258	0.721861
hsa-miR-653-3p	4.27029	0.60586	0.387808	1.56227	0.118225	NA
hsa-miR-3136-3p	10.5973	0.853308	0.342915	2.4884	0.012832	0.155197
hsa-miR-5003-5p	4.63242	0.767839	0.382086	2.0096	0.0444737	NA
hsa-miR-4709-5p	23.8022	0.909606	0.298575	3.04649	0.00231529	0.0439048
hsa-miR-7108-3p	8.01082	-0.264403	0.321712	-0.821863	0.411155	0.842089
hsa-miR-3152-5p	1.87015	-0.462213	0.423207	-1.09217	0.27476	NA
hsa-miR-1197	411.812	0.0597307	0.1602	0.372851	0.709259	0.941592
hsa-miR-548f-3p	4.58936	-0.167398	0.375102	-0.446273	0.6554	NA
hsa-miR-7112-3p	53.6569	0.2633	0.323577	0.813717	0.415807	0.843024
hsa-miR-4749-3p	15.7214	0.176914	0.261243	0.677203	0.498277	0.878707
hsa-miR-4636	16.2263	-0.40226	0.251511	-1.59937	0.109738	0.533409
hsa-miR-3649	0.223352	0.0773584	0.27769	0.278578	0.780569	NA
hsa-miR-6859-5p	18.4301	-0.0753628	0.242948	-0.310202	0.756408	0.958748
hsa-miR-520g-5p	1.79634	-0.366605	0.424219	-0.864189	0.387484	NA
hsa-miR-200b-5p	1.18959	-0.786395	0.423772	-1.8557	0.0634959	NA
hsa-miR-422a	0.842306	0.0718684	0.414024	0.173585	0.862191	NA
hsa-miR-937-3p	9.2607	-0.0461748	0.344177	-0.13416	0.893276	0.988534
hsa-miR-664a-3p	864.62	0.326969	0.182412	1.79248	0.073056	0.428477
hsa-miR-6834-5p	8.05285	0.311881	0.342526	0.910532	0.362542	0.818175
hsa-miR-4713-5p	5.13218	0.33306	0.37937	0.877928	0.379983	NA
hsa-miR-181c-5p	39708.3	0.0864109	0.185614	0.465541	0.641544	0.917032
hsa-miR-6894-3p	25.5646	-0.374044	0.226241	-1.6533	0.0982702	0.494895
hsa-miR-4659a-5p	0.677685	-0.193872	0.40342	-0.480572	0.630821	NA
hsa-miR-4765	2.18845	-0.242008	0.419937	-0.576296	0.564415	NA
hsa-miR-2467-3p	2.3573	-0.0673662	0.419159	-0.160717	0.872316	NA
hsa-miR-3186-3p	3.98735	0.380247	0.380311	0.999832	0.317392	NA
hsa-miR-5587-5p	4.00494	1.01531	0.384779	2.63869	0.00832269	NA
hsa-miR-224-5p	80.9811	-0.604663	0.27259	-2.21821	0.0265405	0.240798
hsa-miR-5584-3p	4.18727	0.356716	0.363182	0.982195	0.326004	NA
hsa-miR-4781-3p	22.4515	-0.204994	0.255611	-0.801978	0.422566	0.843024
hsa-miR-6722-5p	136.768	0.548368	0.368786	1.48695	0.137027	0.578638
hsa-miR-2909	6.2762	-0.416748	0.374331	-1.11331	0.265574	0.740328
hsa-miR-4495	32.6938	-0.997171	0.333607	-2.98906	0.0027984	0.0476738
hsa-miR-6758-3p	5.58121	-0.35398	0.344115	-1.02867	0.303637	0.778607
hsa-miR-8068	4.83342	-0.328824	0.382112	-0.860545	0.389489	NA
hsa-miR-2276-3p	6.65804	-0.0727072	0.350058	-0.207701	0.835463	0.982596
hsa-miR-6080	1.07297	-0.0822096	0.411646	-0.199709	0.841708	NA
hsa-miR-3140-3p	1.51692	0.114015	0.420748	0.270981	0.786405	NA
hsa-miR-26a-2-3p	109.59	-0.0719466	0.220675	-0.326029	0.744402	0.956135
hsa-miR-186-5p	23290.2	-0.202756	0.203634	-0.995685	0.319403	0.791295
hsa-miR-1296-5p	4902.27	0.228885	0.235405	0.972306	0.330899	0.794298
hsa-miR-3126-5p	2.86067	-0.506779	0.404582	-1.2526	0.210352	NA
hsa-miR-6885-5p	2.36712	-0.39674	0.410351	-0.966832	0.333628	NA
hsa-miR-181b-2-3p	9.44736	-0.0502452	0.348272	-0.14427	0.885287	0.988534
hsa-miR-1827	4.88399	-0.491677	0.35557	-1.38279	0.166731	NA
hsa-miR-6850-5p	1.50177	0.264998	0.422932	0.626574	0.530938	NA
hsa-miR-6824-3p	224.552	0.138641	0.314572	0.440729	0.659409	0.922889
hsa-miR-6751-3p	2.5487	0.747632	0.412572	1.81212	0.0699671	NA
hsa-miR-548l	5.7654	-0.240033	0.357514	-0.671396	0.501968	0.879255
hsa-miR-4508	168.328	-0.179715	0.357656	-0.50248	0.61533	0.91663
hsa-miR-17-3p	46.6041	-0.148402	0.242184	-0.612764	0.540033	0.891177
hsa-miR-4670-5p	7.46385	0.509714	0.415725	1.22609	0.220166	0.694636
hsa-miR-767-3p	13.2691	0.318604	0.316247	1.00745	0.313716	0.783525
hsa-miR-6799-5p	4.12966	0.145264	0.389514	0.372937	0.709195	NA
hsa-miR-586	1.30506	-0.696521	0.423396	-1.64508	0.0999526	NA
hsa-miR-4730	3.28432	0.450301	0.416683	1.08068	0.279839	NA
hsa-miR-516a-5p	207.926	-0.551886	0.272072	-2.02846	0.0425133	0.318538
hsa-miR-200a-3p	88.6699	-0.0896468	0.18871	-0.47505	0.634751	0.91663
hsa-miR-3135b	22.8903	-0.89216	0.263894	-3.38075	0.00072287	0.0191709
hsa-miR-8055	0.364884	0.0797351	0.335487	0.23767	0.812137	NA
hsa-miR-27a-3p	2111.39	-0.0560254	0.201761	-0.277681	0.781257	0.970098
hsa-miR-6770-3p	35.7175	-0.0378067	0.218641	-0.172916	0.862717	0.986338
hsa-miR-3187-3p	6.2446	-0.439752	0.349538	-1.25809	0.208358	0.684131
hsa-miR-3615	265.286	0.308127	0.315745	0.97587	0.329129	0.794298
hsa-miR-4269	1.18555	0.0558464	0.419479	0.133133	0.894088	NA
hsa-miR-6812-3p	58.57	0.46378	0.380576	1.21862	0.222987	0.694636
hsa-miR-4737	1.66166	-0.115251	0.421836	-0.273213	0.78469	NA
hsa-miR-660-5p	1231.15	0.251873	0.174892	1.44016	0.149821	0.597404
hsa-miR-4440	12.7073	-0.472458	0.325175	-1.45293	0.146242	0.588483
hsa-miR-6742-3p	13.9145	0.0440379	0.295482	0.149038	0.881524	0.988534
hsa-miR-4739	8.9556	0.505676	0.387548	1.30481	0.191958	0.664072
hsa-miR-4732-3p	8.59108	-0.158204	0.322517	-0.49053	0.623759	0.91663
hsa-miR-1298-3p	354.004	0.231608	0.178249	1.29935	0.193823	0.664537
hsa-miR-4715-5p	5.53007	-0.138351	0.350412	-0.394824	0.692973	0.936734
hsa-miR-4792	11.2399	0.430333	0.33468	1.2858	0.198512	0.674588
hsa-miR-599	0.909129	0.303296	0.401296	0.755793	0.449773	NA
hsa-miR-2116-5p	5.1881	-0.0471229	0.365206	-0.129031	0.897333	0.988534
hsa-miR-4645-5p	9.86101	0.42336	0.351088	1.20585	0.227875	0.697055
hsa-miR-1233-5p	1.79655	-0.594872	0.424157	-1.40248	0.160772	NA
hsa-miR-150-3p	1.40998	-0.548111	0.424151	-1.29225	0.196269	NA
hsa-miR-8080	4.43594	-0.1878	0.38597	-0.486566	0.626566	NA
hsa-miR-21-3p	475.763	0.215261	0.300948	0.715277	0.474438	0.87722
hsa-miR-105-5p	223.061	0.494114	0.208318	2.37192	0.017696	0.190971
hsa-miR-4778-3p	5.34181	-0.0121198	0.388825	-0.0311704	0.975134	0.99391
hsa-miR-328-5p	0.993042	-0.183675	0.416761	-0.44072	0.659416	NA
hsa-miR-4706	1.50184	0.350967	0.423012	0.829686	0.406716	NA
hsa-miR-3160-3p	1.10006	-0.0576484	0.421856	-0.136654	0.891304	NA
hsa-miR-6820-5p	2.86786	0.300451	0.408082	0.736251	0.461578	NA
hsa-miR-654-3p	5249.67	-0.335031	0.216836	-1.54509	0.122325	0.551177
hsa-miR-4429	1.22071	0.0275352	0.424434	0.064875	0.948273	NA
hsa-miR-4294	0.0759351	-0.118009	0.193863	-0.608725	0.542707	NA
hsa-miR-6507-5p	10.2678	-0.347195	0.353518	-0.982114	0.326044	0.794298
hsa-miR-374a-3p	1176.17	0.17171	0.19818	0.866436	0.386251	0.833919
hsa-miR-4433a-5p	36.9776	1.20844	0.35285	3.42479	0.000615267	0.0175009
hsa-miR-149-5p	15037.1	0.0716703	0.162456	0.441169	0.659091	0.922889
hsa-miR-6805-3p	7.8252	0.182533	0.38249	0.477223	0.633203	0.91663
hsa-miR-3668	1.57271	0.194411	0.425215	0.457206	0.647523	NA
hsa-miR-624-3p	1.27294	-0.433699	0.425936	-1.01823	0.308571	NA
hsa-miR-6505-5p	33.5571	0.224645	0.198877	1.12957	0.258659	0.735123
hsa-miR-6840-5p	89.1463	0.721483	0.303936	2.3738	0.0176061	0.190971
hsa-miR-5011-5p	0.282981	-0.0652522	0.333062	-0.195916	0.844676	NA
hsa-miR-609	1.13138	0.405841	0.423526	0.958243	0.33794	NA
hsa-miR-6740-3p	10.4501	-0.337403	0.300596	-1.12245	0.261673	0.737126
hsa-miR-5787	175.326	-0.233665	0.346303	-0.674741	0.499841	0.879255
hsa-miR-9500	0.728042	-0.298065	0.40479	-0.736343	0.461522	NA
hsa-miR-4656	3.32332	-0.434293	0.399509	-1.08707	0.277008	NA
hsa-miR-548at-3p	5.6822	-0.225231	0.349475	-0.644485	0.519261	0.879255
hsa-miR-545-3p	7.34105	-0.163959	0.333893	-0.491054	0.623388	0.91663
hsa-miR-556-5p	2.18131	-0.0336948	0.420056	-0.0802151	0.936066	NA
hsa-miR-6726-5p	5.31898	0.0461655	0.39878	0.115767	0.907837	0.988534
hsa-miR-6862-5p	7.92475	-0.490883	0.331042	-1.48284	0.138116	0.578638
hsa-miR-519d-5p	3.09755	0.592774	0.406038	1.4599	0.144318	NA
hsa-miR-26b-5p	36845.8	0.0218404	0.193711	0.112748	0.910231	0.988534
hsa-miR-103a-2-5p	81.8813	0.00397182	0.30144	0.0131761	0.989487	0.994965
hsa-miR-301b-3p	445.514	-0.0403115	0.220297	-0.182987	0.854808	0.985837
hsa-miR-3194-5p	36.4893	0.270569	0.307908	0.878734	0.379545	0.833919
hsa-miR-605-5p	7.65328	-0.501135	0.335226	-1.49492	0.134936	0.578638
hsa-miR-1227-3p	21.0439	0.17918	0.304041	0.589327	0.555642	0.894054
hsa-miR-6867-3p	1.54629	-0.294275	0.421658	-0.697899	0.48524	NA
hsa-miR-6068	3.48159	-0.0482671	0.376637	-0.128153	0.898028	NA
hsa-miR-412-3p	0.912586	-0.513089	0.412053	-1.2452	0.213058	NA
hsa-miR-4451	31.7772	-0.342883	0.255204	-1.34356	0.17909	0.64878
hsa-miR-7843-5p	2.02347	-0.0432282	0.423595	-0.102051	0.918716	NA
hsa-miR-5009-3p	5.1613	0.424014	0.388599	1.09114	0.275213	NA
hsa-miR-502-3p	140.181	-0.497513	0.23245	-2.1403	0.0323303	0.277427
hsa-miR-29c-3p	7744.36	0.00725151	0.207744	0.034906	0.972155	0.99391
hsa-miR-3683	4.70751	-0.261766	0.375847	-0.696468	0.486136	NA
hsa-miR-7850-5p	2.59621	0.452639	0.404906	1.11789	0.263615	NA
hsa-miR-345-5p	1638.6	-0.314393	0.193076	-1.62833	0.103454	0.509314
hsa-miR-6856-3p	2.86662	-0.519614	0.396005	-1.31214	0.189473	NA
hsa-miR-181a-5p	457273	-0.0742922	0.224842	-0.33042	0.741083	0.956135
hsa-miR-134-3p	1.49321	-0.0253801	0.424887	-0.0597337	0.952368	NA
hsa-miR-498	10.1525	0.173063	0.29497	0.586713	0.557397	0.894054
hsa-miR-3916	1.35308	0.235372	0.422225	0.557456	0.577216	NA
hsa-miR-92a-2-5p	0.151238	0.027933	0.22435	0.124507	0.900914	NA
hsa-miR-548w	6.18578	-0.297549	0.363937	-0.817586	0.413594	0.843024
hsa-miR-4717-3p	7.27432	-0.233724	0.338904	-0.689646	0.490417	0.878707
hsa-miR-548am-3p	3.45858	-0.124994	0.403565	-0.309724	0.756771	NA
hsa-miR-6755-5p	1.97493	0.430835	0.409895	1.05109	0.293218	NA
hsa-miR-3201	4.61695	-0.390027	0.407953	-0.956059	0.339042	NA
hsa-miR-4703-5p	3.06572	-0.254392	0.410638	-0.619504	0.535584	NA
hsa-miR-6856-5p	3.02351	0.497402	0.409236	1.21544	0.224199	NA
hsa-miR-4470	3.55693	0.306184	0.381988	0.801555	0.422811	NA
hsa-miR-19b-2-5p	0.386449	0.0195137	0.322247	0.0605552	0.951713	NA
hsa-miR-431-3p	1895.1	0.13825	0.148398	0.931616	0.351535	0.80847
hsa-miR-4691-5p	13.5428	0.527576	0.334187	1.57869	0.114408	0.54341
hsa-miR-6087	429.141	-0.253006	0.356612	-0.709471	0.478032	0.87729
hsa-miR-744-5p	1863.92	0.121556	0.17676	0.68769	0.491648	0.878707
hsa-miR-4642	3.62067	0.0525123	0.386803	0.13576	0.892011	NA
hsa-miR-141-3p	57.5486	-0.0140941	0.217205	-0.0648888	0.948263	0.99391
hsa-miR-3169	1.00011	-0.38986	0.41927	-0.929853	0.352447	NA
hsa-miR-4484	10182.9	-0.126324	0.276963	-0.456102	0.648316	0.92001
hsa-miR-519e-3p	0.889817	0.444009	0.415423	1.06881	0.285154	NA
hsa-miR-1255a	12.3956	-0.0457888	0.299067	-0.153106	0.878315	0.988534
hsa-miR-4662a-5p	84.174	-0.578045	0.335519	-1.72284	0.084918	0.449412
hsa-miR-4770	2.37699	-0.107996	0.42019	-0.257016	0.797166	NA
hsa-miR-4326	29.0723	-0.0560338	0.302378	-0.18531	0.852986	0.985837
hsa-miR-1233-3p	7.25426	-0.381969	0.315315	-1.21139	0.225746	0.695934
hsa-miR-6877-5p	7.8207	0.5772	0.332753	1.73462	0.0828083	0.446913
hsa-miR-5047	2.39218	-0.791009	0.407229	-1.94242	0.0520865	NA
hsa-miR-526b-5p	2.735	0.14255	0.403244	0.353508	0.723708	NA
hsa-miR-505-3p	83.3604	-0.0497505	0.211598	-0.235117	0.814118	0.979612
hsa-miR-4323	130.565	-0.0179668	0.161501	-0.111249	0.911419	0.988534
hsa-miR-5007-5p	0.865778	0.204397	0.416499	0.490751	0.623603	NA
hsa-miR-3115	4.83446	-0.20622	0.395496	-0.521422	0.602073	NA
hsa-miR-4433b-3p	6.97519	0.27111	0.3845	0.705099	0.480748	0.877728
hsa-miR-4302	2.17094	0.165314	0.413381	0.399906	0.689226	NA
hsa-miR-637	2.42039	-0.416304	0.411032	-1.01283	0.311143	NA
hsa-miR-3907	22.8887	1.01169	0.316686	3.19463	0.0014001	0.0307221
hsa-miR-4264	6.17149	0.336056	0.376051	0.893646	0.371512	0.82582
hsa-miR-548az-3p	2.72324	0.0710294	0.409499	0.173454	0.862294	NA
hsa-miR-4721	8.50826	0.0522217	0.367747	0.142004	0.887077	0.988534
hsa-miR-1537-3p	6.5915	-0.782295	0.351732	-2.22412	0.0261403	0.239933
hsa-miR-6803-5p	6.46261	0.204397	0.350319	0.583461	0.559583	0.894054
hsa-miR-138-5p	24377	-0.107131	0.195971	-0.54667	0.584606	0.900127
hsa-miR-1273e	25.3145	-0.208761	0.329968	-0.632671	0.526949	0.884689
hsa-miR-4457	1.50769	0.0977193	0.425263	0.229785	0.818259	NA
hsa-miR-758-5p	56.1499	-0.526362	0.21354	-2.46494	0.0137037	0.163597
hsa-miR-885-5p	2426.09	-0.360551	0.193078	-1.86739	0.0618477	0.389336
hsa-miR-3177-5p	4.76083	-0.20023	0.363654	-0.550606	0.581904	NA
hsa-miR-1911-3p	575.699	-0.719512	0.354021	-2.0324	0.0421135	0.318538
hsa-miR-1252-5p	40.2541	-0.0609661	0.26837	-0.227171	0.82029	0.979612
hsa-miR-8485	2.09162	-0.325937	0.422508	-0.771433	0.44045	NA
hsa-miR-301a-5p	19.7333	0.128195	0.27242	0.470579	0.637941	0.91663
hsa-miR-1908-3p	68.3144	0.905435	0.234692	3.85797	0.000114331	0.00585374
hsa-miR-192-5p	11482.7	-0.213672	0.233015	-0.91699	0.359148	0.81726
hsa-miR-4474-3p	3.5728	0.12793	0.390214	0.327845	0.743029	NA
hsa-miR-214-3p	47.7836	0.512433	0.261805	1.95731	0.0503116	0.344274
hsa-miR-584-5p	1842.87	-0.264166	0.323424	-0.816778	0.414055	0.843024
hsa-miR-4450	4.01292	0.035097	0.385654	0.0910063	0.927488	NA
hsa-miR-548an	7.81659	0.564882	0.389264	1.45115	0.146738	0.588483
hsa-miR-4277	2.96266	0.0483939	0.416466	0.116201	0.907493	NA
hsa-miR-4682	10.665	0.585428	0.310579	1.88496	0.0594357	0.380389
hsa-miR-548d-3p	1.18138	-0.145605	0.419235	-0.347311	0.728358	NA
hsa-miR-148a-3p	11121	0.0178247	0.170061	0.104814	0.916524	0.988638
hsa-miR-3679-3p	8.3155	-0.273465	0.338324	-0.808294	0.418922	0.843024
hsa-miR-5002-5p	28.8583	-0.427373	0.252687	-1.69131	0.090777	0.468557
hsa-miR-708-3p	639.276	-0.115699	0.176511	-0.655477	0.512161	0.879255
hsa-miR-4667-5p	3.56262	-0.632146	0.381871	-1.65539	0.0978452	NA
hsa-miR-4668-5p	170.468	-0.815904	0.335952	-2.42864	0.0151557	0.173725
hsa-miR-1248	831.54	0.735935	0.384012	1.91644	0.0553095	0.35998
hsa-miR-4716-5p	3.14034	0.226934	0.401381	0.565383	0.571813	NA
hsa-miR-219a-1-3p	10.5572	0.125924	0.342441	0.367724	0.713079	0.943026
hsa-miR-5701	44.2388	1.05657	0.244002	4.33018	1.48987e-05	0.00127135
hsa-miR-203b-3p	10.9242	-0.331738	0.354644	-0.935411	0.349577	0.80847
hsa-miR-6789-3p	3.4995	-0.456309	0.413158	-1.10444	0.269402	NA
hsa-miR-8061	1.05296	0.0775026	0.40379	0.191938	0.847791	NA
hsa-miR-4466	26.4595	-0.000332969	0.327139	-0.00101782	0.999188	0.999839
hsa-miR-924	8.57499	-0.357308	0.335156	-1.06609	0.286382	0.759727
hsa-miR-3167	4.8088	-0.415688	0.370632	-1.12156	0.262048	NA
hsa-miR-4651	8.09412	-0.0306873	0.36694	-0.0836304	0.93335	0.99391
hsa-miR-561-5p	36.2501	0.0191282	0.227287	0.0841588	0.93293	0.99391
hsa-miR-4786-3p	3.02429	-0.0266872	0.406161	-0.0657059	0.947612	NA
hsa-miR-4464	0.791013	0.17066	0.405445	0.42092	0.673814	NA
hsa-miR-6858-5p	12.0249	0.0826494	0.36297	0.227703	0.819877	0.979612
hsa-miR-30c-2-3p	300.706	0.0342466	0.225396	0.15194	0.879235	0.988534
hsa-miR-510-5p	9.2622	-0.00444263	0.346932	-0.0128055	0.989783	0.994965
hsa-miR-4707-3p	398.528	0.76955	0.225505	3.41256	0.000643561	0.0179729
hsa-miR-1976	23.3701	-0.267604	0.287331	-0.931342	0.351677	0.80847
hsa-miR-2392	29.7071	-0.190141	0.267001	-0.712138	0.476379	0.87729
hsa-miR-5700	6.49782	-0.361732	0.370884	-0.975326	0.329399	0.794298
hsa-miR-6766-5p	2.12751	-0.487964	0.417142	-1.16978	0.24209	NA
hsa-miR-6858-3p	8.68787	0.23777	0.336086	0.707466	0.479277	0.877436
hsa-miR-4745-5p	2.83114	0.0261157	0.403892	0.0646602	0.948445	NA
hsa-miR-6815-3p	2.10801	-0.330891	0.416399	-0.794648	0.426818	NA
hsa-miR-1227-5p	3.68514	-0.830886	0.403823	-2.05755	0.0396334	NA
hsa-miR-4476	1.7519	0.332254	0.423503	0.784536	0.432726	NA
hsa-miR-6069	2.1369	-0.303517	0.425082	-0.714019	0.475216	NA
hsa-miR-5190	3.17277	-0.222213	0.406446	-0.546721	0.58457	NA
hsa-miR-1297	58.5847	-0.0452055	0.23266	-0.194299	0.845942	0.985115
hsa-miR-4486	11.8341	-0.131851	0.414946	-0.317753	0.750672	0.958748
hsa-miR-379-5p	1968.7	-0.0119737	0.215221	-0.0556344	0.955633	0.99391
hsa-miR-4251	2.38013	-0.54007	0.425156	-1.27029	0.203983	NA
hsa-miR-759	2.51802	-0.261057	0.401689	-0.649898	0.515758	NA
hsa-miR-6804-3p	5.20791	-0.32882	0.363675	-0.904159	0.365911	0.821695
hsa-miR-542-3p	109.873	0.145139	0.25665	0.565512	0.571726	0.898537
hsa-miR-517-5p	3.24267	-0.30236	0.422202	-0.716149	0.473899	NA
hsa-miR-513c-3p	0.722725	0.457792	0.409367	1.11829	0.263441	NA
hsa-miR-4724-5p	11.2353	0.6688	0.32284	2.07161	0.0383014	0.300046
hsa-miR-6886-5p	14.0142	-0.0360117	0.34251	-0.105141	0.916264	0.988638
hsa-miR-6732-5p	3.53441	0.0373923	0.411906	0.0907786	0.927669	NA
hsa-miR-148b-5p	332.839	0.0099471	0.22608	0.0439981	0.964906	0.99391
hsa-miR-6779-3p	8.19825	0.487918	0.369261	1.32134	0.186389	0.662127
hsa-miR-6758-5p	1.10669	0.196499	0.421493	0.466198	0.641074	NA
hsa-miR-8057	11.5375	0.251503	0.380563	0.66087	0.508696	0.879255
hsa-miR-6792-3p	5.76067	0.606003	0.384561	1.57583	0.115065	0.543814
hsa-miR-1225-3p	93.5781	0.00511811	0.385278	0.0132842	0.989401	0.994965
hsa-miR-548ak	4.60803	-0.129533	0.396107	-0.327015	0.743657	NA
hsa-miR-548h-3p	3.8012	0.558491	0.384917	1.45094	0.146797	NA
hsa-miR-181b-5p	24564.8	-0.130292	0.217837	-0.598115	0.549763	0.893925
hsa-miR-4726-3p	36.39	0.76753	0.36693	2.09176	0.0364596	0.291271
hsa-miR-513a-3p	0.907436	0.192469	0.408899	0.470701	0.637854	NA
hsa-miR-186-3p	1.14167	-0.178292	0.420035	-0.42447	0.671223	NA
hsa-miR-6846-3p	5.33058	-0.308391	0.391539	-0.78764	0.430908	0.846386
hsa-miR-516b-3p	4.4116	-0.165072	0.368012	-0.448551	0.653756	NA
hsa-miR-380-5p	4.11501	0.0694334	0.417289	0.166392	0.867849	NA
hsa-miR-1185-5p	1012.96	0.00922879	0.17839	0.0517339	0.958741	0.99391
hsa-miR-3620-3p	65.723	0.36715	0.200957	1.82701	0.0676984	0.412411
hsa-miR-150-5p	1617.04	-0.17755	0.222258	-0.798848	0.424378	0.843267
hsa-miR-3130-3p	6.49102	0.184709	0.378098	0.488523	0.62518	0.91663
hsa-miR-133a-3p	1019.46	-0.41185	0.277841	-1.48232	0.138255	0.578638
hsa-miR-943	13.5383	-0.150138	0.301788	-0.497495	0.61884	0.91663
hsa-miR-3912-5p	0.853621	-0.17682	0.417046	-0.423983	0.671578	NA
hsa-miR-4465	1.68268	0.0748254	0.420865	0.177789	0.858888	NA
hsa-miR-6780b-3p	44.9167	0.162023	0.392295	0.413013	0.679597	0.934254
hsa-miR-6716-3p	26.5034	-0.0308895	0.289753	-0.106606	0.915101	0.988638
hsa-miR-3155a	0.910753	0.516567	0.414216	1.2471	0.212362	NA
hsa-miR-548ag	8.50998	0.335444	0.320944	1.04518	0.295941	0.772347
hsa-miR-302b-3p	8.59936	1.99831	0.424646	4.70583	2.52841e-06	0.000298742
hsa-miR-1266-3p	182.736	0.600927	0.235393	2.55287	0.0106841	0.135626
hsa-miR-3681-5p	37.9333	-0.00320916	0.241149	-0.0133078	0.989382	0.994965
hsa-miR-571	1.73018	0.0123338	0.422974	0.0291597	0.976737	NA
hsa-miR-4671-3p	15.9614	0.108582	0.261388	0.415405	0.677846	0.933785
hsa-miR-6873-5p	7.02389	0.0485435	0.362255	0.134004	0.8934	0.988534
hsa-miR-29b-3p	11900.3	0.173722	0.270408	0.642444	0.520585	0.879255
hsa-miR-8073	2.43833	0.588121	0.415094	1.41684	0.15653	NA
hsa-miR-4761-5p	1.54401	-0.324551	0.419399	-0.773848	0.439021	NA
hsa-miR-4683	1.67205	0.518826	0.424192	1.22309	0.221295	NA
hsa-miR-7108-5p	12.1131	0.372048	0.33853	1.09901	0.271764	0.742834
hsa-miR-92a-3p	56061.6	-0.259515	0.207741	-1.24923	0.211583	0.686004
hsa-miR-3674	2.08747	0.766478	0.420021	1.82486	0.0680225	NA
hsa-miR-553	5.55605	-0.201992	0.370759	-0.544807	0.585886	0.9008
hsa-miR-5702	8.03484	0.213278	0.351004	0.607624	0.543437	0.891834
hsa-miR-6748-3p	3.58125	0.619482	0.411235	1.50639	0.131966	NA
[truncated: 566 more rows]

## Sheet: piRNA tissue
piRNA name (RNAdb2.0)	piRNA ID (Genomatix)	piRNA name (piRBase)	baseMean	log2FoldChange	lfcSE	stat	pvalue	padj
piR-54381	GXN_19668	piR-hsa-17560	415.885	-0.458274	0.306607	-1.49466	0.135003	0.372788
NA	GXN_445298	NA	0	NA	NA	NA	NA	NA
NA	GXN_445299	NA	0	NA	NA	NA	NA	NA
NA	GXN_445300	NA	0	NA	NA	NA	NA	NA
NA	GXN_445301	NA	0	NA	NA	NA	NA	NA
NA	GXN_445302	NA	0	NA	NA	NA	NA	NA
NA	GXN_445303	NA	0	NA	NA	NA	NA	NA
NA	GXN_445304	NA	0.331374	-0.311349	0.5383	-0.578394	0.562998	NA
NA	GXN_445305	NA	0	NA	NA	NA	NA	NA
NA	GXN_445306	NA	0	NA	NA	NA	NA	NA
NA	GXN_445308	NA	2.06277	-0.526879	0.504336	-1.0447	0.296162	NA
NA	GXN_445309	NA	0	NA	NA	NA	NA	NA
NA	GXN_445310	NA	0	NA	NA	NA	NA	NA
NA	GXN_445311	NA	0	NA	NA	NA	NA	NA
NA	GXN_445312	NA	0	NA	NA	NA	NA	NA
NA	GXN_445313	NA	0	NA	NA	NA	NA	NA
NA	GXN_445314	NA	0	NA	NA	NA	NA	NA
NA	GXN_445315	NA	0	NA	NA	NA	NA	NA
NA	GXN_445316	NA	0	NA	NA	NA	NA	NA
NA	GXN_445318	NA	129.93	-0.359219	0.345681	-1.03916	0.298729	0.572779
NA	GXN_445319	NA	0	NA	NA	NA	NA	NA
NA	GXN_445320	NA	0	NA	NA	NA	NA	NA
NA	GXN_445321	NA	0	NA	NA	NA	NA	NA
NA	GXN_445322	NA	0	NA	NA	NA	NA	NA
NA	GXN_445323	NA	0	NA	NA	NA	NA	NA
NA	GXN_445324	NA	0	NA	NA	NA	NA	NA
NA	GXN_446737	NA	1.24434	0.349649	0.542261	0.644797	0.519058	NA
NA	GXN_446740	NA	0	NA	NA	NA	NA	NA
NA	GXN_446741	NA	0	NA	NA	NA	NA	NA
NA	GXN_446742	NA	0.044923	0.103296	0.333768	0.309485	0.756953	NA
NA	GXN_446751	NA	0	NA	NA	NA	NA	NA
NA	GXN_446759	NA	0.623378	0.461637	0.567086	0.814051	0.415616	NA
NA	GXN_446760	NA	0	NA	NA	NA	NA	NA
NA	GXN_446769	NA	0	NA	NA	NA	NA	NA
NA	GXN_446777	NA	0	NA	NA	NA	NA	NA
NA	GXN_446794	NA	0	NA	NA	NA	NA	NA
NA	GXN_446796	NA	0	NA	NA	NA	NA	NA
NA	GXN_446798	NA	0	NA	NA	NA	NA	NA
NA	GXN_446799	NA	0.877504	-0.273106	0.560063	-0.487634	0.625809	NA
NA	GXN_446800	NA	1.30732	-0.0636531	0.538472	-0.118211	0.905901	NA
NA	GXN_446845	NA	0	NA	NA	NA	NA	NA
NA	GXN_446846	NA	0.0452613	0.109622	0.334128	0.328083	0.742849	NA
NA	GXN_446847	NA	0.553871	0.223174	0.562036	0.39708	0.691308	NA
NA	GXN_446848	NA	0	NA	NA	NA	NA	NA
NA	GXN_446849	NA	23.6346	0.617149	0.30755	2.00666	0.0447855	0.196515
NA	GXN_446850	NA	0	NA	NA	NA	NA	NA
NA	GXN_446851	NA	0	NA	NA	NA	NA	NA
NA	GXN_446853	NA	0	NA	NA	NA	NA	NA
NA	GXN_446854	NA	0.135784	0.311979	0.372402	0.837746	0.402174	NA
NA	GXN_446855	NA	0	NA	NA	NA	NA	NA
NA	GXN_446856	NA	0	NA	NA	NA	NA	NA
NA	GXN_446857	NA	0.544107	-0.113825	0.571314	-0.199234	0.842079	NA
NA	GXN_446858	NA	0	NA	NA	NA	NA	NA
NA	GXN_446859	NA	0	NA	NA	NA	NA	NA
NA	GXN_446860	NA	0	NA	NA	NA	NA	NA
NA	GXN_446861	NA	0	NA	NA	NA	NA	NA
NA	GXN_446862	NA	0	NA	NA	NA	NA	NA
NA	GXN_446864	NA	0	NA	NA	NA	NA	NA
NA	GXN_446865	NA	0	NA	NA	NA	NA	NA
NA	GXN_446866	NA	0	NA	NA	NA	NA	NA
NA	GXN_446867	NA	0	NA	NA	NA	NA	NA
NA	GXN_446868	NA	0	NA	NA	NA	NA	NA
NA	GXN_446869	NA	0	NA	NA	NA	NA	NA
NA	GXN_446870	NA	0	NA	NA	NA	NA	NA
NA	GXN_446871	NA	0	NA	NA	NA	NA	NA
NA	GXN_446872	NA	0	NA	NA	NA	NA	NA
NA	GXN_446873	NA	0	NA	NA	NA	NA	NA
NA	GXN_446875	NA	0	NA	NA	NA	NA	NA
NA	GXN_446876	NA	0	NA	NA	NA	NA	NA
NA	GXN_446877	NA	0	NA	NA	NA	NA	NA
NA	GXN_446878	NA	2.00547	-0.903599	0.550098	-1.64261	0.100463	NA
NA	GXN_446879	NA	0	NA	NA	NA	NA	NA
NA	GXN_446880	NA	515.252	0.255969	0.402378	0.636141	0.524685	0.757135
NA	GXN_446881	NA	0	NA	NA	NA	NA	NA
NA	GXN_446882	NA	0	NA	NA	NA	NA	NA
NA	GXN_446883	NA	0	NA	NA	NA	NA	NA
NA	GXN_446884	NA	0	NA	NA	NA	NA	NA
NA	GXN_446887	NA	0	NA	NA	NA	NA	NA
NA	GXN_446888	NA	0	NA	NA	NA	NA	NA
NA	GXN_446889	NA	0	NA	NA	NA	NA	NA
NA	GXN_446890	NA	0	NA	NA	NA	NA	NA
NA	GXN_446891	NA	0	NA	NA	NA	NA	NA
NA	GXN_446892	NA	0	NA	NA	NA	NA	NA
NA	GXN_446893	NA	0	NA	NA	NA	NA	NA
NA	GXN_446895	NA	0	NA	NA	NA	NA	NA
NA	GXN_446896	NA	0.0340366	0.0882704	0.333183	0.26493	0.791063	NA
NA	GXN_446897	NA	0	NA	NA	NA	NA	NA
NA	GXN_446898	NA	0	NA	NA	NA	NA	NA
NA	GXN_446899	NA	0	NA	NA	NA	NA	NA
NA	GXN_446900	NA	0	NA	NA	NA	NA	NA
NA	GXN_446901	NA	0	NA	NA	NA	NA	NA
NA	GXN_446902	NA	0.0389328	-0.201974	0.333087	-0.606369	0.54427	NA
NA	GXN_446903	NA	0	NA	NA	NA	NA	NA
NA	GXN_446905	NA	0	NA	NA	NA	NA	NA
NA	GXN_446906	NA	0	NA	NA	NA	NA	NA
NA	GXN_446907	NA	0	NA	NA	NA	NA	NA
NA	GXN_446908	NA	0	NA	NA	NA	NA	NA
NA	GXN_446909	NA	0	NA	NA	NA	NA	NA
NA	GXN_446910	NA	0	NA	NA	NA	NA	NA
NA	GXN_446911	NA	0	NA	NA	NA	NA	NA
NA	GXN_446912	NA	0	NA	NA	NA	NA	NA
NA	GXN_446913	NA	0	NA	NA	NA	NA	NA
NA	GXN_446914	NA	0	NA	NA	NA	NA	NA
NA	GXN_446916	NA	0	NA	NA	NA	NA	NA
NA	GXN_446917	NA	0	NA	NA	NA	NA	NA
NA	GXN_446918	NA	0	NA	NA	NA	NA	NA
NA	GXN_446919	NA	0	NA	NA	NA	NA	NA
NA	GXN_446920	NA	0	NA	NA	NA	NA	NA
NA	GXN_446921	NA	0	NA	NA	NA	NA	NA
NA	GXN_446922	NA	0	NA	NA	NA	NA	NA
NA	GXN_446923	NA	0	NA	NA	NA	NA	NA
NA	GXN_446924	NA	0	NA	NA	NA	NA	NA
NA	GXN_446925	NA	0	NA	NA	NA	NA	NA
NA	GXN_446927	NA	0	NA	NA	NA	NA	NA
NA	GXN_446928	NA	21.92	0.632875	0.356536	1.77506	0.0758872	0.265208
NA	GXN_446929	NA	0	NA	NA	NA	NA	NA
NA	GXN_446930	NA	0	NA	NA	NA	NA	NA
NA	GXN_446931	NA	0	NA	NA	NA	NA	NA
NA	GXN_446932	NA	0	NA	NA	NA	NA	NA
NA	GXN_446933	NA	0.431018	0.400202	0.565971	0.707106	0.4795	NA
NA	GXN_446934	NA	0	NA	NA	NA	NA	NA
NA	GXN_446935	NA	0	NA	NA	NA	NA	NA
NA	GXN_446936	NA	0	NA	NA	NA	NA	NA
NA	GXN_446938	NA	0	NA	NA	NA	NA	NA
NA	GXN_446939	NA	0	NA	NA	NA	NA	NA
NA	GXN_446940	NA	0	NA	NA	NA	NA	NA
NA	GXN_446941	NA	0	NA	NA	NA	NA	NA
NA	GXN_446942	NA	0	NA	NA	NA	NA	NA
NA	GXN_446944	NA	0	NA	NA	NA	NA	NA
NA	GXN_446945	NA	0	NA	NA	NA	NA	NA
NA	GXN_446946	NA	0.323771	0.132724	0.554266	0.239458	0.81075	NA
NA	GXN_446947	NA	43.5923	-0.121279	0.406755	-0.298161	0.76558	0.900111
NA	GXN_446948	NA	0	NA	NA	NA	NA	NA
NA	GXN_446949	NA	0	NA	NA	NA	NA	NA
NA	GXN_446950	NA	0	NA	NA	NA	NA	NA
NA	GXN_446951	NA	0	NA	NA	NA	NA	NA
NA	GXN_446952	NA	0	NA	NA	NA	NA	NA
NA	GXN_446953	NA	0	NA	NA	NA	NA	NA
NA	GXN_446955	NA	0	NA	NA	NA	NA	NA
NA	GXN_446956	NA	0	NA	NA	NA	NA	NA
NA	GXN_446957	NA	0	NA	NA	NA	NA	NA
NA	GXN_446958	NA	0	NA	NA	NA	NA	NA
NA	GXN_446959	NA	0	NA	NA	NA	NA	NA
NA	GXN_446960	NA	0	NA	NA	NA	NA	NA
NA	GXN_446961	NA	0	NA	NA	NA	NA	NA
NA	GXN_446962	NA	0	NA	NA	NA	NA	NA
NA	GXN_446963	NA	0	NA	NA	NA	NA	NA
NA	GXN_446964	NA	0	NA	NA	NA	NA	NA
NA	GXN_446966	NA	0	NA	NA	NA	NA	NA
piR-30172	GXN_539429	piR-hsa-149	0	NA	NA	NA	NA	NA
piR-30173	GXN_539430	piR-hsa-150	3.11315	-0.0679635	0.477139	-0.14244	0.886733	NA
piR-30174	GXN_539431	piR-hsa-151	1.40368	-0.355057	0.53691	-0.661296	0.508423	NA
piR-30175	GXN_539432	piR-hsa-152	39.1077	0.255821	0.407705	0.627466	0.530354	0.759474
piR-30176	GXN_539433	piR-hsa-153	3.92077	-0.40901	0.487798	-0.838482	0.40176	NA
piR-30177	GXN_539434	piR-hsa-154	2.53335	0.147786	0.48914	0.302134	0.76255	NA
piR-30178	GXN_539435	piR-hsa-155	2.47231	-0.605165	0.476682	-1.26953	0.20425	NA
piR-30179	GXN_539436	piR-hsa-156	1.81655	-0.101609	0.520499	-0.195214	0.845225	NA
piR-30180	GXN_539437	piR-hsa-157	429.259	0.345974	0.441615	0.78343	0.433375	0.69201
piR-30181	GXN_539439	piR-hsa-158	1.04423	-0.275754	0.561041	-0.491504	0.62307	NA
piR-30182	GXN_539440	piR-hsa-159	4.82774	-0.267122	0.411269	-0.649507	0.516011	NA
piR-30183	GXN_539441	piR-hsa-160	1.90408	-0.0145234	0.526656	-0.0275765	0.978	NA
piR-30184	GXN_539442	piR-hsa-161	3.35334	-0.413013	0.457522	-0.902717	0.366676	NA
piR-30185	GXN_539443	piR-hsa-162	0.100972	0.389893	0.421551	0.924899	0.355018	NA
piR-30186	GXN_539444	piR-hsa-163	1.71713	-0.250619	0.539348	-0.464671	0.642167	NA
piR-30420	GXN_539445	piR-hsa-164	9.54419	-0.462557	0.362108	-1.2774	0.201461	0.460971
piR-30421	GXN_539447	piR-hsa-165	3.62283	-0.441973	0.485478	-0.910387	0.362618	NA
piR-30422	GXN_539448	piR-hsa-166	0.752276	-0.356905	0.568451	-0.627856	0.530099	NA
piR-30423	GXN_539449	piR-hsa-167	0	NA	NA	NA	NA	NA
piR-30424	GXN_539450	piR-hsa-168	0	NA	NA	NA	NA	NA
piR-30425	GXN_539451	piR-hsa-169	0.58299	-0.841112	0.570644	-1.47397	0.14049	NA
piR-30426	GXN_539452	piR-hsa-170	7.72346	0.297446	0.42366	0.702086	0.482625	0.728847
piR-30427	GXN_539453	piR-hsa-171	0.587847	-0.123707	0.568493	-0.217604	0.827737	NA
piR-30428	GXN_539454	piR-hsa-172	5.56407	-0.0654485	0.387778	-0.168778	0.865971	NA
piR-30429	GXN_539455	piR-hsa-173	4.71194	0.937032	0.416976	2.24721	0.0246266	NA
piR-30430	GXN_539456	piR-hsa-174	4.09149	-0.244481	0.410541	-0.59551	0.551503	NA
piR-30431	GXN_539458	piR-hsa-175	2.1142	-0.203842	0.490647	-0.415455	0.677809	NA
piR-30432	GXN_539459	piR-hsa-176	2.55106	-0.222869	0.485461	-0.459087	0.646172	NA
piR-30433	GXN_539460	piR-hsa-177	17.0022	0.36052	0.464019	0.776952	0.437187	0.695348
piR-30434	GXN_539461	piR-hsa-178	2.05319	-0.225843	0.530036	-0.42609	0.670042	NA
piR-30435	GXN_539462	piR-hsa-179	5.68621	-0.0963321	0.390552	-0.246656	0.805174	NA
piR-30436	GXN_539463	piR-hsa-180	6.94537	0.410924	0.383746	1.07082	0.28425	NA
piR-30437	GXN_539464	piR-hsa-181	3.80235	-0.400608	0.458052	-0.874589	0.381797	NA
piR-30438	GXN_539465	piR-hsa-182	1220.19	-0.258124	0.31571	-0.817596	0.413588	0.676756
piR-30439	GXN_539466	piR-hsa-183	4.7717	0.338234	0.465958	0.725888	0.467907	NA
piR-30440	GXN_539467	piR-hsa-184	4.92415	0.330056	0.476039	0.693339	0.488097	NA
piR-30441	GXN_539469	piR-hsa-185	87.1269	0.261604	0.209496	1.24873	0.211762	0.47318
piR-30442	GXN_539470	piR-hsa-186	8.51692	0.66938	0.346464	1.93204	0.0533552	0.217714
piR-30443	GXN_539471	piR-hsa-187	170.416	0.285997	0.328617	0.870307	0.384132	0.650594
piR-30444	GXN_539472	piR-hsa-188	1.68477	-0.456533	0.519704	-0.878448	0.379701	NA
piR-30445	GXN_539473	piR-hsa-189	0.83063	-0.161312	0.571851	-0.282088	0.777876	NA
piR-30446	GXN_539474	piR-hsa-190	0.334721	0.492968	0.534417	0.922441	0.356299	NA
piR-30447	GXN_539475	piR-hsa-191	0.429463	-0.379412	0.549157	-0.690899	0.489629	NA
piR-30448	GXN_539476	piR-hsa-192	9.05957	-0.643916	0.376756	-1.70911	0.0874311	0.287842
piR-30681	GXN_539477	piR-hsa-193	0.607693	-0.271031	0.570114	-0.475398	0.634503	NA
piR-30682	GXN_539478	piR-hsa-194	39.1567	0.566651	0.391113	1.44881	0.147389	0.390813
piR-30683	GXN_539479	piR-hsa-195	0.983308	-0.873687	0.563834	-1.54955	0.12125	NA
piR-30684	GXN_539480	piR-hsa-196	10.3141	-0.745583	0.325257	-2.29229	0.0218891	0.127398
piR-30685	GXN_539481	piR-hsa-197	2.54748	-0.0920156	0.506482	-0.181676	0.855837	NA
piR-30686	GXN_539482	piR-hsa-198	1.58162	-0.0982054	0.566831	-0.173253	0.862452	NA
piR-30687	GXN_539483	piR-hsa-199	3.84492	-0.523422	0.452819	-1.15592	0.247715	NA
piR-30688	GXN_539484	piR-hsa-200	7.96984	0.398074	0.377557	1.05434	0.291726	0.565758
piR-30689	GXN_539485	piR-hsa-201	53.1858	0.300832	0.437843	0.687078	0.492034	0.736179
piR-30690	GXN_539486	piR-hsa-202	156.399	0.212789	0.246652	0.86271	0.388297	0.653781
piR-30691	GXN_539488	piR-hsa-203	399.16	0.665279	0.364226	1.82656	0.0677665	0.249442
piR-30692	GXN_539489	piR-hsa-204	8.5488	-0.0538742	0.356478	-0.151129	0.879874	0.952783
piR-30693	GXN_539490	piR-hsa-205	1.26327	0.660177	0.553985	1.19169	0.233384	NA
piR-30694	GXN_539491	piR-hsa-206	11.4198	0.14879	0.357068	0.416698	0.6769	0.854796
piR-30695	GXN_539492	piR-hsa-207	12.1449	0.0919005	0.341496	0.269111	0.787844	0.911053
piR-30929	GXN_539493	piR-hsa-208	1.77722	-0.653304	0.538819	-1.21247	0.225331	NA
piR-30930	GXN_539494	piR-hsa-209	3.29847	-0.063974	0.45523	-0.140531	0.888241	NA
piR-30931	GXN_539496	piR-hsa-210	10.4311	0.826929	0.427209	1.93566	0.0529098	0.216927
piR-30932	GXN_539497	piR-hsa-211	46.5433	-0.524003	0.306537	-1.70943	0.0873715	0.287842
piR-30933	GXN_539498	piR-hsa-212	4.82479	-0.371273	0.435296	-0.852921	0.393703	NA
piR-30934	GXN_539499	piR-hsa-213	10.195	-0.0376	0.40966	-0.0917834	0.92687	0.971978
piR-30935	GXN_539500	piR-hsa-214	4.25375	-0.115699	0.405748	-0.285149	0.77553	NA
piR-30936	GXN_539501	piR-hsa-215	5.43836	0.297762	0.415025	0.717457	0.473092	NA
piR-30937	GXN_539502	piR-hsa-216	0.807322	0.102968	0.566988	0.181605	0.855892	NA
piR-30938	GXN_539503	piR-hsa-217	1.38813	-0.251207	0.541294	-0.464086	0.642586	NA
piR-30939	GXN_539504	piR-hsa-218	0	NA	NA	NA	NA	NA
piR-30940	GXN_539505	piR-hsa-219	3.61073	0.625736	0.453576	1.37956	0.167722	NA
piR-30941	GXN_539507	piR-hsa-220	0.35853	-0.556736	0.548095	-1.01577	0.309741	NA
piR-30942	GXN_539508	piR-hsa-221	1.11213	-0.535663	0.552312	-0.969856	0.332118	NA
piR-31176	GXN_539509	piR-hsa-222	0.504769	-0.10119	0.554925	-0.18235	0.855308	NA
piR-31177	GXN_539510	piR-hsa-223	0.481003	-0.442375	0.559276	-0.790977	0.428957	NA
piR-31178	GXN_539511	piR-hsa-224	7.61185	0.407221	0.383825	1.06096	0.28871	NA
piR-31179	GXN_539512	piR-hsa-225	42.8863	0.234041	0.291859	0.801898	0.422612	0.682784
piR-31180	GXN_539513	piR-hsa-226	7.01598	-0.67518	0.368703	-1.83123	0.0670661	NA
piR-31181	GXN_539515	piR-hsa-227	0.251502	-0.0747095	0.513945	-0.145365	0.884423	NA
piR-31182	GXN_539516	piR-hsa-228	1.30343	0.933288	0.551925	1.69097	0.0908424	NA
piR-31183	GXN_539517	piR-hsa-229	0.479596	0.249922	0.566118	0.441467	0.658875	NA
piR-31184	GXN_539518	piR-hsa-230	1.49008	0.0387704	0.537171	0.0721752	0.942463	NA
piR-31185	GXN_539519	piR-hsa-231	3.19194	-0.625725	0.465057	-1.34548	0.17847	NA
piR-31186	GXN_539520	piR-hsa-232	0.319783	-0.474516	0.529111	-0.896817	0.369817	NA
piR-31187	GXN_539521	piR-hsa-233	3.3545	-0.264809	0.462347	-0.572748	0.566815	NA
piR-31188	GXN_539522	piR-hsa-234	0.873504	0.134854	0.569637	0.236737	0.812861	NA
piR-31189	GXN_539523	piR-hsa-235	3.97102	0.803962	0.541558	1.48454	0.137667	NA
piR-31190	GXN_539524	piR-hsa-236	9.74983	0.405182	0.384691	1.05326	0.29222	0.565923
piR-30025	GXN_539599	piR-hsa-237	16.1498	0.769666	0.382916	2.01001	0.0444301	0.195538
piR-30026	GXN_539600	piR-hsa-238	2.09879	0.557633	0.501155	1.1127	0.265839	NA
piR-30027	GXN_539601	piR-hsa-239	2.37947	-0.62502	0.541843	-1.15351	0.248702	NA
piR-30028	GXN_539602	piR-hsa-240	2.14212	0.996338	0.515918	1.9312	0.0534589	NA
piR-30029	GXN_539603	piR-hsa-241	5.13948	-0.335948	0.400321	-0.839197	0.401359	NA
piR-30030	GXN_539604	piR-hsa-242	32.8199	0.363352	0.31229	1.16351	0.244624	0.513549
piR-30031	GXN_539606	piR-hsa-243	0.432798	-0.0131011	0.557983	-0.0234793	0.981268	NA
piR-30032	GXN_539607	piR-hsa-244	1.75238	0.305599	0.536144	0.569994	0.568682	NA
piR-30033	GXN_539608	piR-hsa-245	4.43596	-0.370389	0.408924	-0.905765	0.36506	NA
piR-30034	GXN_539609	piR-hsa-246	2.16149	-0.223065	0.495544	-0.450141	0.652609	NA
piR-30035	GXN_539610	piR-hsa-247	30.7886	-0.387997	0.258935	-1.49844	0.13402	0.37101
piR-30036	GXN_539611	piR-hsa-248	5.92576	-0.367923	0.437144	-0.841653	0.399982	NA
piR-30037	GXN_539612	piR-hsa-249	67.2215	-0.488638	0.387848	-1.25987	0.207717	0.467957
piR-30038	GXN_539613	piR-hsa-250	4.2974	-0.249721	0.426098	-0.586065	0.557832	NA
piR-30039	GXN_539614	piR-hsa-251	23.2391	0.0547216	0.289499	0.189021	0.850076	0.941379
piR-30040	GXN_539615	piR-hsa-252	0.736441	-0.0163872	0.571092	-0.0286944	0.977108	NA
piR-30041	GXN_539617	piR-hsa-253	4.70611	-0.388005	0.40052	-0.968751	0.332669	NA
piR-30042	GXN_539618	piR-hsa-254	1.73572	0.128114	0.551167	0.232441	0.816195	NA
piR-30043	GXN_539619	piR-hsa-255	67.1792	0.031491	0.294986	0.106754	0.914984	0.967983
piR-30044	GXN_539620	piR-hsa-256	14.9608	-0.118705	0.360272	-0.329488	0.741787	0.889054
piR-30045	GXN_539621	piR-hsa-257	4.73682	-0.158464	0.391321	-0.404946	0.685517	NA
piR-30046	GXN_539622	piR-hsa-258	0	NA	NA	NA	NA	NA
piR-30047	GXN_539623	piR-hsa-259	1.08256	-0.0657878	0.555458	-0.118439	0.90572	NA
piR-30048	GXN_539624	piR-hsa-260	3.59432	-0.462561	0.429963	-1.07582	0.282009	NA
piR-30049	GXN_539625	piR-hsa-261	7.35783	0.17576	0.372294	0.472101	0.636855	NA
piR-30050	GXN_539626	piR-hsa-262	2.69382	-1.08495	0.489283	-2.21743	0.026594	NA
piR-30051	GXN_539628	piR-hsa-263	1.20477	-0.192942	0.541794	-0.356116	0.721753	NA
piR-30052	GXN_539629	piR-hsa-264	2.33284	-0.903382	0.497692	-1.81514	0.0695018	NA
piR-30053	GXN_539630	piR-hsa-265	0.649677	-0.44282	0.570912	-0.775636	0.437964	NA
piR-30054	GXN_539631	piR-hsa-266	0.0687421	-0.197863	0.33284	-0.594469	0.552199	NA
piR-30055	GXN_539632	piR-hsa-267	4.58484	-0.00875134	0.426621	-0.0205132	0.983634	NA
piR-30056	GXN_539633	piR-hsa-268	1.48647	-0.00517662	0.538765	-0.0096083	0.992334	NA
piR-30057	GXN_539634	piR-hsa-269	2.18415	-0.324986	0.488504	-0.665268	0.505879	NA
piR-30058	GXN_539635	piR-hsa-270	0.600503	-0.558531	0.56456	-0.989321	0.322506	NA
piR-30059	GXN_539636	piR-hsa-271	0.574212	-1.01018	0.562094	-1.79718	0.0723073	NA
piR-30060	GXN_539637	piR-hsa-272	6.32107	1.19712	0.457164	2.61859	0.00882946	NA
piR-30061	GXN_539639	piR-hsa-273	4.60987	-0.069608	0.451699	-0.154102	0.877529	NA
piR-30062	GXN_539640	piR-hsa-274	0.912084	0.795568	0.569282	1.39749	0.162265	NA
piR-30063	GXN_539641	piR-hsa-275	4.0598	0.337833	0.43852	0.770394	0.441066	NA
piR-30064	GXN_539642	piR-hsa-276	1.61258	-0.549478	0.540649	-1.01633	0.309472	NA
piR-30065	GXN_539643	piR-hsa-277	15.6417	0.459909	0.327327	1.40504	0.160008	0.406788
piR-30066	GXN_539644	piR-hsa-278	10.1357	0.740878	0.521513	1.42063	0.155423	0.401567
piR-30067	GXN_539645	piR-hsa-279	0.289262	0.300346	0.50914	0.589907	0.555253	NA
piR-30068	GXN_539646	piR-hsa-280	1.3465	0.378907	0.551819	0.686651	0.492303	NA
piR-30069	GXN_539647	piR-hsa-281	0.261145	0.413841	0.525333	0.787769	0.430832	NA
piR-30070	GXN_539648	piR-hsa-282	3.21672	0.313371	0.449182	0.697648	0.485397	NA
piR-30071	GXN_539650	piR-hsa-283	19.5312	0.348106	0.259028	1.34389	0.178983	0.430082
piR-30072	GXN_539651	piR-hsa-284	4.39652	0.120076	0.444598	0.270077	0.787101	NA
piR-30073	GXN_539652	piR-hsa-285	0.69185	0.712074	0.572852	1.24303	0.213856	NA
piR-30074	GXN_539653	piR-hsa-286	10.2108	0.137164	0.339215	0.404358	0.68595	0.860224
piR-30075	GXN_539654	piR-hsa-287	2.11965	-0.131255	0.487219	-0.269397	0.787624	NA
piR-30076	GXN_539655	piR-hsa-288	2.65984	0.22882	0.490093	0.466891	0.640578	NA
piR-30077	GXN_539656	piR-hsa-289	6.79496	0.24651	0.404848	0.608895	0.542594	NA
piR-30078	GXN_539657	piR-hsa-290	24.4841	-0.409229	0.374513	-1.0927	0.274526	0.546559
piR-30079	GXN_539658	piR-hsa-291	1.27604	0.549166	0.533798	1.02879	0.303579	NA
piR-30080	GXN_539659	piR-hsa-292	0	NA	NA	NA	NA	NA
piR-30081	GXN_539661	piR-hsa-293	5.18872	-0.438838	0.417816	-1.05032	0.293573	NA
piR-30082	GXN_539662	piR-hsa-294	0.992584	0.532126	0.562081	0.946708	0.343788	NA
piR-30083	GXN_539663	piR-hsa-295	0.496229	-0.126036	0.567619	-0.222043	0.82428	NA
piR-30084	GXN_539664	piR-hsa-296	0	NA	NA	NA	NA	NA
piR-30085	GXN_539665	piR-hsa-297	0	NA	NA	NA	NA	NA
piR-30086	GXN_539666	piR-hsa-298	0	NA	NA	NA	NA	NA
piR-30087	GXN_539667	piR-hsa-299	0	NA	NA	NA	NA	NA
piR-30088	GXN_539668	piR-hsa-300	14.2241	0.512547	0.315047	1.62689	0.10376	0.318895
piR-30089	GXN_539669	piR-hsa-301	110.49	0.389492	0.312234	1.24744	0.212237	0.473828
piR-30090	GXN_539670	piR-hsa-302	4.98187	0.597136	0.430372	1.38749	0.165293	NA
piR-30091	GXN_539672	piR-hsa-303	21.8574	0.404015	0.301519	1.33993	0.180268	0.432001
piR-30092	GXN_539673	piR-hsa-304	0.510723	0.581462	0.562921	1.03294	0.301634	NA
piR-30093	GXN_539674	piR-hsa-305	0.967704	-0.54243	0.56724	-0.956262	0.33894	NA
piR-30094	GXN_539675	piR-hsa-306	3.69727	0.0675662	0.436683	0.154726	0.877037	NA
piR-30095	GXN_539676	piR-hsa-307	0.652482	-0.771831	0.571303	-1.351	0.176695	NA
piR-30096	GXN_539677	piR-hsa-308	0.130111	-0.134697	0.396878	-0.339392	0.734314	NA
piR-30097	GXN_539678	piR-hsa-309	0.229925	0.699669	0.48588	1.44	0.149867	NA
piR-30098	GXN_539679	piR-hsa-310	0	NA	NA	NA	NA	NA
piR-30099	GXN_539680	piR-hsa-311	0.825015	0.379684	0.566856	0.669807	0.502981	NA
piR-30100	GXN_539681	piR-hsa-312	1.10269	-0.176818	0.560228	-0.315618	0.752292	NA
piR-30101	GXN_539682	piR-hsa-313	1.69981	0.653671	0.520781	1.25517	0.209416	NA
piR-30102	GXN_539683	piR-hsa-314	2.00985	-0.830082	0.521967	-1.5903	0.111768	NA
piR-30103	GXN_539684	piR-hsa-315	52.6155	0.313787	0.361023	0.869161	0.384759	0.650824
piR-30104	GXN_539685	piR-hsa-316	0	NA	NA	NA	NA	NA
piR-30105	GXN_539686	piR-hsa-317	472.642	-0.324503	0.408953	-0.793496	0.427489	0.687165
piR-30106	GXN_539687	piR-hsa-318	4.4156	0.33068	0.441167	0.749556	0.453522	NA
piR-30107	GXN_539688	piR-hsa-319	1.54361	0.483561	0.55057	0.878292	0.379785	NA
piR-30108	GXN_539689	piR-hsa-320	3.76247	0.0769206	0.439612	0.174974	0.8611	NA
piR-30109	GXN_539690	piR-hsa-321	0.402017	0.352052	0.556795	0.632282	0.527202	NA
piR-30110	GXN_539691	piR-hsa-322	0.115946	-0.243131	0.350262	-0.694142	0.487593	NA
piR-30111	GXN_539693	piR-hsa-323	91.2922	1.18674	0.336355	3.52824	0.00041834	0.0089943
piR-30112	GXN_539694	piR-hsa-324	3047.57	-1.54423	0.360662	-4.28165	1.85513e-05	0.000847064
piR-30113	GXN_539695	piR-hsa-325	11083.2	-0.340066	0.27704	-1.2275	0.219636	0.481655
piR-30114	GXN_539696	piR-hsa-326	1.73957	-0.0989709	0.540742	-0.183028	0.854776	NA
piR-30115	GXN_539697	piR-hsa-327	0	NA	NA	NA	NA	NA
piR-30116	GXN_539698	piR-hsa-328	0	NA	NA	NA	NA	NA
piR-30117	GXN_539699	piR-hsa-329	9.50302	-0.206278	0.338835	-0.608786	0.542666	0.767477
piR-30118	GXN_539700	piR-hsa-330	4.17049	0.470653	0.422889	1.11295	0.265731	NA
piR-30119	GXN_539701	piR-hsa-331	2.29793	0.371014	0.486449	0.762698	0.445644	NA
piR-30120	GXN_539702	piR-hsa-332	0.37896	0.683583	0.555496	1.23058	0.21848	NA
piR-30121	GXN_539704	piR-hsa-333	0.473945	1.15956	0.544915	2.12796	0.03334	NA
piR-30122	GXN_539705	piR-hsa-334	37.5814	-0.544829	0.29557	-1.84332	0.0652824	0.244045
piR-30123	GXN_539706	piR-hsa-335	2.08705	0.413656	0.523264	0.790531	0.429218	NA
piR-30124	GXN_539707	piR-hsa-336	0.290825	-0.360547	0.494722	-0.728787	0.466132	NA
piR-30125	GXN_539708	piR-hsa-337	2.79691	-0.0893455	0.471053	-0.189672	0.849566	NA
piR-30126	GXN_539709	piR-hsa-338	3.55305	0.480341	0.443133	1.08397	0.27838	NA
piR-30127	GXN_539710	piR-hsa-339	2.40729	-0.877225	0.4768	-1.83982	0.0657953	NA
piR-30128	GXN_539711	piR-hsa-340	2.60817	0.217644	0.489679	0.444463	0.656708	NA
piR-30129	GXN_539712	piR-hsa-341	1.3223	0.732028	0.560656	1.30566	0.191667	NA
piR-30130	GXN_539713	piR-hsa-342	2.21511	0.066853	0.498504	0.134107	0.893318	NA
piR-30131	GXN_539714	piR-hsa-343	7.25852	0.315385	0.400168	0.788131	0.43062	NA
piR-30132	GXN_539715	piR-hsa-344	11.5079	-0.263919	0.571123	-0.462106	0.644006	0.836188
piR-30133	GXN_539716	piR-hsa-345	3.85308	0.247287	0.455641	0.542724	0.58732	NA
piR-30134	GXN_539717	piR-hsa-346	7.28091	-0.114002	0.354631	-0.321465	0.747858	NA
piR-30135	GXN_539718	piR-hsa-347	0.790945	-0.618293	0.569279	-1.0861	0.277435	NA
piR-30136	GXN_539719	piR-hsa-348	9.72347	0.039216	0.329294	0.119091	0.905203	0.963244
piR-30137	GXN_539720	piR-hsa-349	1.09887	-0.475667	0.55976	-0.849769	0.395454	NA
piR-30138	GXN_539721	piR-hsa-350	1.90546	-0.235719	0.524628	-0.449308	0.65321	NA
piR-30139	GXN_539722	piR-hsa-351	5.10023	0.315528	0.404381	0.780275	0.435229	NA
piR-30140	GXN_539723	piR-hsa-352	55.7867	-1.32739	0.338308	-3.92361	8.72325e-05	0.00284749
piR-30141	GXN_539725	piR-hsa-353	1.4604	-0.514542	0.535391	-0.961057	0.336523	NA
piR-30142	GXN_539726	piR-hsa-354	0.819664	-0.149071	0.565604	-0.263561	0.792118	NA
piR-30143	GXN_539727	piR-hsa-355	2.76459	-0.0865075	0.504012	-0.171638	0.863722	NA
piR-30144	GXN_539728	piR-hsa-356	3.721	0.165736	0.515775	0.321334	0.747957	NA
piR-30145	GXN_539729	piR-hsa-357	5.54705	-0.352836	0.478624	-0.737189	0.461007	NA
piR-30146	GXN_539730	piR-hsa-358	5.51246	-0.0876729	0.403108	-0.217492	0.827825	NA
piR-30147	GXN_539731	piR-hsa-359	0.816736	-0.396772	0.571139	-0.694703	0.487241	NA
piR-30148	GXN_539732	piR-hsa-360	0	NA	NA	NA	NA	NA
piR-30149	GXN_539733	piR-hsa-361	10.0365	-0.0734927	0.32351	-0.227173	0.820289	0.928088
piR-30150	GXN_539734	piR-hsa-362	9.94501	-0.0336639	0.39122	-0.0860486	0.931428	0.974842
piR-30151	GXN_539735	piR-hsa-363	0.120668	-0.158144	0.393341	-0.402052	0.687645	NA
piR-30152	GXN_539736	piR-hsa-364	1.1913	-0.339101	0.567116	-0.597939	0.549881	NA
piR-30153	GXN_539737	piR-hsa-365	7.03717	-0.151541	0.424355	-0.357109	0.72101	NA
piR-30154	GXN_539738	piR-hsa-366	0	NA	NA	NA	NA	NA
piR-30155	GXN_539739	piR-hsa-367	0.0932882	0.263233	0.378454	0.695549	0.486712	NA
piR-30156	GXN_539740	piR-hsa-368	0	NA	NA	NA	NA	NA
piR-30157	GXN_539741	piR-hsa-369	5.88078	-0.168575	0.413685	-0.407496	0.683644	NA
piR-30158	GXN_539742	piR-hsa-370	4.85592	-0.758761	0.417736	-1.81636	0.0693147	NA
piR-30159	GXN_539743	piR-hsa-371	0	NA	NA	NA	NA	NA
piR-30160	GXN_539744	piR-hsa-372	0.786153	0.646906	0.571124	1.13269	0.257345	NA
piR-30161	GXN_539746	piR-hsa-373	4.37747	-2.05298	0.453569	-4.52628	6.00299e-06	NA
piR-30162	GXN_539747	piR-hsa-374	0.243343	-0.143651	0.499083	-0.287829	0.773477	NA
piR-30163	GXN_539748	piR-hsa-375	0	NA	NA	NA	NA	NA
piR-30164	GXN_539749	piR-hsa-376	9.07748	-0.288541	0.376063	-0.767268	0.442922	0.699107
piR-30165	GXN_539750	piR-hsa-377	1.47785	0.495825	0.54098	0.916531	0.359389	NA
piR-30166	GXN_539751	piR-hsa-378	18.2822	0.426539	0.366128	1.165	0.244019	0.512904
piR-30167	GXN_539752	piR-hsa-379	1.52233	-0.536859	0.537035	-0.999672	0.317469	NA
piR-30168	GXN_539753	piR-hsa-380	2.2075	0.0473213	0.499859	0.0946691	0.924578	NA
piR-30169	GXN_539754	piR-hsa-381	0.568739	-0.36326	0.570295	-0.636968	0.524146	NA
piR-30170	GXN_539755	piR-hsa-382	0	NA	NA	NA	NA	NA
piR-30171	GXN_539757	piR-hsa-383	0.348695	-0.153124	0.549127	-0.278849	0.780361	NA
piR-30187	GXN_539758	piR-hsa-384	17.6354	-0.0567841	0.304389	-0.186551	0.852013	0.942366
piR-30188	GXN_539759	piR-hsa-385	51.866	-0.736181	0.398532	-1.84723	0.0647133	0.242272
piR-30189	GXN_539760	piR-hsa-386	1.5331	0.0522292	0.535154	0.0975964	0.922253	NA
piR-30190	GXN_539761	piR-hsa-387	0	NA	NA	NA	NA	NA
piR-30191	GXN_539763	piR-hsa-388	424.831	-0.189929	0.316725	-0.599665	0.54873	0.770565
piR-30192	GXN_539764	piR-hsa-389	2.78461	-0.181037	0.484063	-0.373994	0.708409	NA
piR-30193	GXN_539765	piR-hsa-390	1.81347	-0.0299754	0.512088	-0.0585357	0.953322	NA
piR-30194	GXN_539766	piR-hsa-391	3.04134	0.260928	0.459496	0.567858	0.570131	NA
piR-30195	GXN_539767	piR-hsa-392	1.16717	-0.0577949	0.555673	-0.104009	0.917162	NA
piR-30196	GXN_539768	piR-hsa-393	10.0262	0.997459	0.3792	2.63043	0.00852766	0.0712589
piR-30197	GXN_539769	piR-hsa-394	0.658436	-0.52211	0.571309	-0.913882	0.360779	NA
piR-30198	GXN_539770	piR-hsa-395	1.6588	-0.211122	0.539744	-0.391151	0.695685	NA
piR-30199	GXN_539771	piR-hsa-396	3.93474	0.149209	0.445061	0.335254	0.737433	NA
piR-30200	GXN_539772	piR-hsa-397	1.84108	0.582098	0.506299	1.14971	0.250263	NA
piR-30201	GXN_539774	piR-hsa-398	1.97408	-0.537588	0.517525	-1.03877	0.298913	NA
piR-30202	GXN_539775	piR-hsa-399	2.6635	-0.403444	0.493164	-0.818073	0.413315	NA
piR-30203	GXN_539776	piR-hsa-400	13.9481	-0.345517	0.304714	-1.13391	0.256834	0.528054
piR-30204	GXN_539777	piR-hsa-401	2.96698	-0.713669	0.455874	-1.5655	0.117467	NA
piR-30205	GXN_539778	piR-hsa-402	1.08269	0.0526632	0.551774	0.0954434	0.923963	NA
piR-30206	GXN_539779	piR-hsa-403	2.26747	-0.068646	0.494184	-0.138908	0.889523	NA
piR-30207	GXN_539780	piR-hsa-404	41.204	-0.182681	0.309077	-0.591056	0.554483	0.774902
piR-30208	GXN_539781	piR-hsa-405	4.46142	0.100153	0.41441	0.241677	0.80903	NA
piR-30209	GXN_539782	piR-hsa-406	1.50599	-0.473945	0.520923	-0.909818	0.362919	NA
piR-30210	GXN_539783	piR-hsa-407	5.16836	-0.630494	0.396827	-1.58884	0.112097	NA
piR-30211	GXN_539785	piR-hsa-408	0.759432	0.308532	0.574178	0.537346	0.591028	NA
piR-30212	GXN_539786	piR-hsa-409	0.228143	0.139086	0.496849	0.279936	0.779526	NA
piR-30213	GXN_539787	piR-hsa-410	13.406	-0.212548	0.368503	-0.576789	0.564082	0.780638
piR-30214	GXN_539788	piR-hsa-411	1.51272	0.644366	0.526121	1.22475	0.22067	NA
piR-30215	GXN_539789	piR-hsa-412	0.317405	0.175591	0.532647	0.329657	0.741659	NA
piR-30216	GXN_539790	piR-hsa-413	3.16077	-0.482417	0.460814	-1.04688	0.295155	NA
piR-30217	GXN_539791	piR-hsa-414	5.88447	0.584983	0.386943	1.51181	0.130583	NA
piR-30218	GXN_539792	piR-hsa-415	10.5938	0.138789	0.39176	0.35427	0.723137	0.882329
piR-30219	GXN_539793	piR-hsa-416	11.2814	-0.377317	0.381316	-0.989512	0.322413	0.595815
piR-30220	GXN_539794	piR-hsa-417	0.851713	0.510467	0.568183	0.89842	0.368962	NA
piR-30221	GXN_539796	piR-hsa-418	0.338731	-0.12372	0.551475	-0.224344	0.82249	NA
piR-30222	GXN_539797	piR-hsa-419	2.85985	-0.0964459	0.5215	-0.184939	0.853277	NA
piR-30223	GXN_539798	piR-hsa-420	0.574921	-0.404945	0.5682	-0.71268	0.476044	NA
piR-30224	GXN_539799	piR-hsa-421	0.333685	0.11391	0.545009	0.209006	0.834444	NA
piR-30225	GXN_539800	piR-hsa-422	1.47138	1.05511	0.543732	1.94049	0.0523197	NA
piR-30226	GXN_539801	piR-hsa-423	11.628	0.160986	0.333174	0.483189	0.628962	0.828286
piR-30227	GXN_539802	piR-hsa-424	0.153677	-0.312867	0.461253	-0.678299	0.497582	NA
piR-30228	GXN_539803	piR-hsa-425	3.69255	0.270882	0.469172	0.577362	0.563695	NA
piR-30229	GXN_539804	piR-hsa-426	36663.5	-0.443447	0.399112	-1.11108	0.266532	0.539465
piR-30230	GXN_539805	piR-hsa-427	16.5108	0.864784	0.521708	1.6576	0.0973984	0.306684
piR-30231	GXN_539807	piR-hsa-428	16.3516	-0.0357271	0.351002	-0.101786	0.918927	0.968813
piR-30232	GXN_539808	piR-hsa-429	19.6685	1.25866	0.350989	3.58605	0.000335731	0.00787582
piR-30233	GXN_539809	piR-hsa-430	9.58994	-0.691975	0.342828	-2.01843	0.0435463	0.19316
piR-30234	GXN_539810	piR-hsa-431	5.0802	0.149215	0.40979	0.364126	0.715764	NA
piR-30235	GXN_539811	piR-hsa-432	1.00692	0.326548	0.571627	0.57126	0.567823	NA
piR-30236	GXN_539812	piR-hsa-433	2.80795	0.887246	0.549809	1.61373	0.106585	NA
piR-30237	GXN_539813	piR-hsa-434	8.32923	0.850158	0.444848	1.91112	0.055989	0.223663
piR-30238	GXN_539814	piR-hsa-435	7.13486	-0.0135063	0.372102	-0.0362974	0.971045	NA
piR-30239	GXN_539815	piR-hsa-436	3.19829	0.362598	0.460788	0.786908	0.431336	NA
piR-30240	GXN_539816	piR-hsa-437	1.79923	-1.19023	0.51933	-2.29185	0.0219142	NA
piR-30241	GXN_539818	piR-hsa-438	7.99137	-0.00228118	0.337354	-0.00676196	0.994605	0.99864
piR-30242	GXN_539819	piR-hsa-439	5.28957	0.361134	0.426792	0.846159	0.397464	NA
piR-30243	GXN_539820	piR-hsa-440	4.97787	-0.2354	0.439614	-0.53547	0.592325	NA
piR-30244	GXN_539821	piR-hsa-441	16.8245	-0.393756	0.326143	-1.20731	0.227312	0.492991
piR-30245	GXN_539822	piR-hsa-442	1.06895	-0.0413959	0.555695	-0.0744939	0.940617	NA
piR-30246	GXN_539823	piR-hsa-443	14.2143	0.519841	0.297466	1.74756	0.0805397	0.274401
piR-30247	GXN_539824	piR-hsa-444	0.129285	0.114302	0.435704	0.262339	0.79306	NA
piR-30248	GXN_539825	piR-hsa-445	0.133661	0.137341	0.365463	0.3758	0.707065	NA
piR-30249	GXN_539826	piR-hsa-446	0.698824	-0.00618828	0.573543	-0.0107896	0.991391	NA
piR-30250	GXN_539827	piR-hsa-447	3.36113	0.191514	0.429204	0.446208	0.655447	NA
piR-30251	GXN_539829	piR-hsa-448	0.497724	0.444841	0.568635	0.782297	0.43404	NA
piR-30252	GXN_539830	piR-hsa-449	0.0698546	0.201896	0.359559	0.561509	0.57445	NA
piR-30253	GXN_539831	piR-hsa-450	0	NA	NA	NA	NA	NA
piR-30254	GXN_539832	piR-hsa-451	0.543178	-0.560952	0.573947	-0.977358	0.328392	NA
piR-30255	GXN_539833	piR-hsa-452	4.04556	0.134629	0.433697	0.310421	0.756241	NA
piR-30256	GXN_539834	piR-hsa-453	0.412816	-0.273404	0.567324	-0.481919	0.629864	NA
piR-30257	GXN_539835	piR-hsa-454	11.1763	0.675487	0.375425	1.79926	0.0719777	0.256571
piR-30258	GXN_539836	piR-hsa-455	0.590323	-0.0421809	0.573982	-0.0734881	0.941418	NA
piR-30259	GXN_539837	piR-hsa-456	3.80053	1.07215	0.452367	2.37009	0.0177836	NA
piR-30260	GXN_539838	piR-hsa-457	1.45	0.512682	0.533121	0.961661	0.33622	NA
piR-30261	GXN_539840	piR-hsa-458	5.54726	0.445141	0.458751	0.970334	0.33188	NA
piR-30262	GXN_539841	piR-hsa-459	0.194314	-0.386748	0.479768	-0.806114	0.420177	NA
piR-30263	GXN_539842	piR-hsa-460	4.53292	-0.337983	0.482705	-0.700186	0.483811	NA
piR-30264	GXN_539843	piR-hsa-461	2.60766	-0.220507	0.511494	-0.431104	0.666393	NA
piR-30265	GXN_539844	piR-hsa-462	3.63802	0.256846	0.459507	0.55896	0.576189	NA
piR-30266	GXN_539845	piR-hsa-463	0.410516	0.50551	0.538098	0.939438	0.347506	NA
piR-30267	GXN_539846	piR-hsa-464	0.486981	0.229458	0.551825	0.415817	0.677544	NA
piR-30268	GXN_539847	piR-hsa-465	74.3837	-0.32925	0.359531	-0.915775	0.359785	0.628681
piR-30269	GXN_539848	piR-hsa-466	2.19211	-0.320168	0.486702	-0.657832	0.510646	NA
piR-30270	GXN_539849	piR-hsa-467	5.11416	-0.308301	0.418225	-0.737165	0.461022	NA
piR-30271	GXN_539850	piR-hsa-468	1.73603	0.320004	0.539752	0.592872	0.553267	NA
piR-30272	GXN_539851	piR-hsa-469	1.33891	-0.547605	0.535751	-1.02213	0.306722	NA
piR-30273	GXN_539852	piR-hsa-470	7.92714	0.280258	0.414046	0.676875	0.498485	0.740775
piR-30274	GXN_539853	piR-hsa-471	20.571	-0.831935	0.280207	-2.969	0.00298768	0.0347776
piR-30275	GXN_539854	piR-hsa-472	0	NA	NA	NA	NA	NA
piR-30276	GXN_539855	piR-hsa-473	1.68689	0.38085	0.53847	0.707282	0.479391	NA
piR-30277	GXN_539856	piR-hsa-474	9.35734	0.511814	0.372508	1.37397	0.169452	0.419436
piR-30278	GXN_539857	piR-hsa-475	2.89392	-0.187782	0.452952	-0.414574	0.678454	NA
piR-30279	GXN_539858	piR-hsa-476	1.95327	0.439317	0.524326	0.83787	0.402104	NA
piR-30280	GXN_539859	piR-hsa-477	2.13809	-0.443335	0.529054	-0.837976	0.402044	NA
piR-30281	GXN_539860	piR-hsa-478	42.1935	-0.0910157	0.369236	-0.246497	0.805298	0.918856
piR-30282	GXN_539861	piR-hsa-479	3.16666	0.775084	0.463894	1.67082	0.0947566	NA
piR-30283	GXN_539862	piR-hsa-480	1.0602	0.591923	0.566243	1.04535	0.29586	NA
piR-30284	GXN_539863	piR-hsa-481	4.95327	0.0249794	0.40762	0.061281	0.951135	NA
piR-30285	GXN_539864	piR-hsa-482	5.9152	0.471289	0.373317	1.26244	0.206792	NA
piR-30286	GXN_539865	piR-hsa-483	2.42105	0.393152	0.486839	0.807561	0.419343	NA
piR-30287	GXN_539866	piR-hsa-484	6.10822	-0.850021	0.392121	-2.16775	0.0301775	NA
piR-30288	GXN_539867	piR-hsa-485	5.06085	0.993429	0.41447	2.39687	0.016536	NA
piR-30289	GXN_539868	piR-hsa-486	2.84694	0.0275658	0.468142	0.0588835	0.953045	NA
piR-30290	GXN_539869	piR-hsa-487	1.15846	-0.506259	0.547666	-0.924393	0.355282	NA
piR-30291	GXN_539871	piR-hsa-488	5.73288	-0.0115344	0.4007	-0.0287856	0.977036	NA
piR-30292	GXN_539872	piR-hsa-489	11.6357	-0.124134	0.429127	-0.289271	0.772374	0.903364
piR-30293	GXN_539873	piR-hsa-490	73.203	-2.30431	0.435118	-5.29583	1.18479e-07	1.78206e-05
piR-30294	GXN_539874	piR-hsa-491	4.04687	-0.0505079	0.418646	-0.120646	0.903972	NA
piR-30295	GXN_539875	piR-hsa-492	3.39216	0.811465	0.457482	1.77377	0.076102	NA
piR-30296	GXN_539876	piR-hsa-493	2.44269	-0.154073	0.494515	-0.311563	0.755373	NA
piR-30297	GXN_539877	piR-hsa-494	0.863759	-0.0246468	0.570187	-0.0432259	0.965521	NA
piR-30298	GXN_539878	piR-hsa-495	0.574763	-0.758054	0.56934	-1.33146	0.183037	NA
piR-30299	GXN_539879	piR-hsa-496	2.38881	0.137123	0.501252	0.273562	0.784422	NA
piR-30300	GXN_539880	piR-hsa-497	0.226014	0.00788664	0.510851	0.0154383	0.987683	NA
piR-30301	GXN_539882	piR-hsa-498	3.63334	-0.320235	0.476456	-0.672117	0.501509	NA
piR-30302	GXN_539883	piR-hsa-499	2.98672	-0.290016	0.496654	-0.583941	0.55926	NA
piR-30303	GXN_539884	piR-hsa-500	2.13049	0.121683	0.517458	0.235156	0.814088	NA
piR-30304	GXN_539885	piR-hsa-501	0.971801	0.0150323	0.570563	0.0263465	0.978981	NA
piR-30305	GXN_539886	piR-hsa-502	11.6872	-0.0560296	0.310996	-0.180162	0.857026	0.943236
piR-30306	GXN_539887	piR-hsa-503	0.116022	-0.0938981	0.406092	-0.231224	0.817141	NA
piR-30307	GXN_539888	piR-hsa-504	19.5169	0.761883	0.568441	1.3403	0.180147	0.431998
piR-30308	GXN_539889	piR-hsa-505	0.819909	-0.542497	0.565345	-0.959587	0.337263	NA
piR-30309	GXN_539890	piR-hsa-506	2.95334	-0.331186	0.477072	-0.694206	0.487553	NA
piR-30310	GXN_539891	piR-hsa-507	1.37486	0.0737794	0.54615	0.13509	0.892541	NA
piR-30311	GXN_539892	piR-hsa-508	0.366139	-0.804094	0.535968	-1.50026	0.133546	NA
piR-30312	GXN_539893	piR-hsa-509	0.137895	0.00169227	0.404582	0.00418275	0.996663	NA
piR-30313	GXN_539894	piR-hsa-510	0	NA	NA	NA	NA	NA
piR-30314	GXN_539895	piR-hsa-511	0.751314	-0.990316	0.572857	-1.72873	0.0838575	NA
piR-30315	GXN_539896	piR-hsa-512	11.8063	0.0757093	0.357325	0.211878	0.832202	0.933961
piR-30316	GXN_539897	piR-hsa-513	0.153158	-0.474331	0.408983	-1.15978	0.246137	NA
piR-30317	GXN_539898	piR-hsa-514	2.13106	-0.65268	0.490471	-1.33072	0.183281	NA
piR-30318	GXN_539899	piR-hsa-515	630.354	0.073192	0.446785	0.163819	0.869874	0.94811
piR-30319	GXN_539900	piR-hsa-516	9.26828	0.504904	0.337774	1.4948	0.134967	0.372788
piR-30320	GXN_539901	piR-hsa-517	1.2528	-0.119225	0.539216	-0.221107	0.825009	NA
piR-30321	GXN_539902	piR-hsa-518	0.799715	0.076328	0.571119	0.133646	0.893682	NA
piR-30322	GXN_539903	piR-hsa-519	2.44569	-0.417147	0.4971	-0.839162	0.401378	NA
piR-30323	GXN_539904	piR-hsa-520	2.43095	-0.692593	0.486317	-1.42416	0.1544	NA
piR-30324	GXN_539905	piR-hsa-521	1.86811	-0.767251	0.538378	-1.42512	0.154124	NA
piR-30325	GXN_539906	piR-hsa-522	0.499275	0.528382	0.569254	0.928201	0.353304	NA
piR-30326	GXN_539907	piR-hsa-523	2.14299	0.347446	0.510902	0.680065	0.496463	NA
piR-30327	GXN_539908	piR-hsa-524	10.6981	-0.262194	0.32681	-0.802283	0.422389	0.682568
piR-30328	GXN_539909	piR-hsa-525	1.60133	0.44794	0.534212	0.838506	0.401746	NA
piR-30329	GXN_539910	piR-hsa-526	4.95227	-0.349459	0.425597	-0.821102	0.411588	NA
piR-30330	GXN_539911	piR-hsa-527	3.10156	-0.695784	0.460223	-1.51184	0.130575	NA
piR-30331	GXN_539912	piR-hsa-528	0.469857	0.79531	0.534815	1.48707	0.136995	NA
piR-30332	GXN_539913	piR-hsa-529	4.25914	-0.0565654	0.433575	-0.130463	0.8962	NA
piR-30333	GXN_539914	piR-hsa-530	13.7759	-0.0869957	0.369205	-0.23563	0.81372	0.923393
piR-30334	GXN_539915	piR-hsa-531	1.83379	0.225394	0.501662	0.449294	0.65322	NA
piR-30335	GXN_539916	piR-hsa-532	15.2367	0.82465	0.37783	2.1826	0.0290656	0.151882
piR-30336	GXN_539917	piR-hsa-533	315.518	0.132386	0.340609	0.388674	0.697517	0.867205
piR-30337	GXN_539918	piR-hsa-534	1.20465	1.0173	0.560855	1.81384	0.0697027	NA
piR-30338	GXN_539919	piR-hsa-535	186.399	0.040613	0.383153	0.105997	0.915585	0.968021
piR-30339	GXN_539920	piR-hsa-536	5.02944	0.036728	0.409487	0.0896925	0.928532	NA
piR-30340	GXN_539921	piR-hsa-537	45.0447	0.139742	0.539593	0.258977	0.795653	0.915071
piR-30341	GXN_539923	piR-hsa-538	1.58475	0.425721	0.524802	0.811204	0.417249	NA
piR-30342	GXN_539924	piR-hsa-539	0.481824	-0.0662491	0.552381	-0.119934	0.904536	NA
piR-30343	GXN_539925	piR-hsa-540	3.60862	-0.784808	0.488175	-1.60764	0.107915	NA
piR-30344	GXN_539926	piR-hsa-541	1.2826	0.574323	0.539645	1.06426	0.28721	NA
piR-30345	GXN_539927	piR-hsa-542	1.09273	-0.196701	0.565105	-0.348079	0.727781	NA
piR-30346	GXN_539928	piR-hsa-543	9.23664	-0.42909	0.367061	-1.16899	0.242408	0.510294
piR-30347	GXN_539929	piR-hsa-544	1.68398	0.0341953	0.535468	0.0638606	0.949081	NA
piR-30348	GXN_539930	piR-hsa-545	3.64815	-0.0973976	0.463545	-0.210114	0.833578	NA
piR-30349	GXN_539931	piR-hsa-546	3.74071	0.0128361	0.455396	0.0281866	0.977513	NA
piR-30350	GXN_539932	piR-hsa-547	4.31404	-0.277041	0.447435	-0.619176	0.5358	NA
piR-30351	GXN_539934	piR-hsa-548	1.47883	0.0460309	0.537914	0.0855728	0.931806	NA
piR-30352	GXN_539935	piR-hsa-549	2.29952	-0.174723	0.495859	-0.352364	0.724565	NA
piR-30353	GXN_539936	piR-hsa-550	0.829692	0.717511	0.570858	1.2569	0.20879	NA
piR-30354	GXN_539937	piR-hsa-551	2.32143	-0.134854	0.508825	-0.265031	0.790986	NA
piR-30355	GXN_539938	piR-hsa-552	1.37422	0.115608	0.541898	0.21334	0.831062	NA
piR-30356	GXN_539939	piR-hsa-553	0.612212	-0.242174	0.569634	-0.425139	0.670735	NA
piR-30357	GXN_539940	piR-hsa-554	3.85885	0.544174	0.437994	1.24242	0.214081	NA
piR-30358	GXN_539941	piR-hsa-555	1.50737	-0.313852	0.529028	-0.593261	0.553006	NA
piR-30359	GXN_539942	piR-hsa-556	4.85378	0.057054	0.402882	0.141615	0.887384	NA
piR-30360	GXN_539943	piR-hsa-557	1.52011	0.0280655	0.55157	0.0508829	0.959419	NA
piR-30361	GXN_539945	piR-hsa-558	2.04083	0.345191	0.558575	0.617985	0.536585	NA
piR-30362	GXN_539946	piR-hsa-559	328.708	-2.91606	0.420731	-6.93093	4.18086e-12	1.85003e-09
piR-30363	GXN_539947	piR-hsa-560	15.0606	0.0334309	0.338122	0.0988724	0.92124	0.969893
piR-30364	GXN_539948	piR-hsa-561	1.39619	-0.152698	0.52718	-0.28965	0.772084	NA
piR-30365	GXN_539949	piR-hsa-562	0.676485	-0.242907	0.572281	-0.424454	0.671235	NA
piR-30366	GXN_539950	piR-hsa-563	10.6334	0.828984	0.501072	1.65442	0.0980423	0.30823
piR-30367	GXN_539951	piR-hsa-564	5.45146	-0.118627	0.454243	-0.261154	0.793974	NA
piR-30368	GXN_539952	piR-hsa-565	0.946663	-0.464126	0.573771	-0.808904	0.41857	NA
piR-30369	GXN_539953	piR-hsa-566	36.4147	0.792322	0.313316	2.52883	0.0114443	0.0854814
piR-30370	GXN_539954	piR-hsa-567	1.1007	0.724653	0.558112	1.2984	0.19415	NA
piR-30371	GXN_539956	piR-hsa-568	1.02942	0.796588	0.561262	1.41928	0.155818	NA
piR-30372	GXN_539957	piR-hsa-569	1.98245	0.340519	0.511128	0.66621	0.505277	NA
piR-30373	GXN_539958	piR-hsa-570	11.4554	0.530099	0.545731	0.971356	0.331371	0.605295
piR-30374	GXN_539959	piR-hsa-571	5.95707	1.02624	0.475818	2.15679	0.0310224	NA
piR-30375	GXN_539960	piR-hsa-572	1.67929	-0.510533	0.545606	-0.935716	0.349419	NA
piR-30376	GXN_539961	piR-hsa-573	7.84435	-2.01453	0.447453	-4.50221	6.72504e-06	0.000379322
piR-30377	GXN_539962	piR-hsa-574	0.148262	-0.124417	0.402416	-0.309175	0.757188	NA
piR-30378	GXN_539963	piR-hsa-575	19.7135	0.576854	0.298303	1.93379	0.0531394	0.21752
piR-30379	GXN_539964	piR-hsa-576	0.0340366	0.0882704	0.333183	0.26493	0.791063	NA
piR-30380	GXN_539965	piR-hsa-577	0	NA	NA	NA	NA	NA
piR-30381	GXN_539967	piR-hsa-578	0	NA	NA	NA	NA	NA
piR-30382	GXN_539968	piR-hsa-579	0	NA	NA	NA	NA	NA
piR-30383	GXN_539969	piR-hsa-580	0.824439	-0.435921	0.567644	-0.767947	0.442519	NA
piR-30384	GXN_539970	piR-hsa-581	0	NA	NA	NA	NA	NA
piR-30385	GXN_539971	piR-hsa-582	0	NA	NA	NA	NA	NA
piR-30386	GXN_539972	piR-hsa-583	0	NA	NA	NA	NA	NA
piR-30387	GXN_539973	piR-hsa-584	1.39085	-0.300417	0.553336	-0.54292	0.587185	NA
piR-30388	GXN_539974	piR-hsa-585	0.604791	-0.488834	0.570295	-0.85716	0.391356	NA
piR-30389	GXN_539975	piR-hsa-586	1.27121	0.230663	0.541483	0.425983	0.67012	NA
piR-30390	GXN_539976	piR-hsa-587	0.964381	-0.0581368	0.566056	-0.102705	0.918197	NA
piR-30391	GXN_539978	piR-hsa-588	0	NA	NA	NA	NA	NA
piR-30392	GXN_539979	piR-hsa-589	1.25568	-0.349909	0.536819	-0.651818	0.514519	NA
piR-30393	GXN_539980	piR-hsa-590	0.721401	0.897741	0.567891	1.58083	0.113916	NA
piR-30394	GXN_539981	piR-hsa-591	2.6984	-0.725644	0.475981	-1.52452	0.127378	NA
piR-30395	GXN_539982	piR-hsa-592	7.73287	-0.170318	0.380845	-0.447211	0.654723	0.844239
piR-30396	GXN_539983	piR-hsa-593	4.95145	0.461528	0.476692	0.968188	0.332951	NA
piR-30397	GXN_539984	piR-hsa-594	34.0231	0.650551	0.359453	1.80983	0.0703215	0.253966
piR-30398	GXN_539985	piR-hsa-595	0.93912	0.624774	0.562703	1.11031	0.266866	NA
piR-30399	GXN_539986	piR-hsa-596	2131.98	-0.594266	0.372756	-1.59425	0.11088	0.331801
piR-30400	GXN_539987	piR-hsa-597	4.64743	0.435834	0.502325	0.867634	0.385595	NA
piR-30401	GXN_539989	piR-hsa-598	2.24994	-0.376528	0.525726	-0.716204	0.473865	NA
piR-30402	GXN_539990	piR-hsa-599	0.905447	0.369189	0.562767	0.656025	0.511808	NA
piR-30403	GXN_539991	piR-hsa-600	0.136757	0.0123758	0.439867	0.0281354	0.977554	NA
piR-30404	GXN_539992	piR-hsa-601	0.343851	0.340215	0.549729	0.618877	0.535997	NA
piR-30405	GXN_539993	piR-hsa-602	4.16764	-1.30687	0.427886	-3.05425	0.00225622	NA
piR-30406	GXN_539994	piR-hsa-603	4.5502	0.0195795	0.435127	0.0449972	0.96411	NA
piR-30407	GXN_539995	piR-hsa-604	0.184047	-0.578543	0.434837	-1.33048	0.183359	NA
piR-30408	GXN_539996	piR-hsa-605	2.33663	-0.0999966	0.492561	-0.203014	0.839124	NA
piR-30409	GXN_539997	piR-hsa-606	6.87158	0.129633	0.372567	0.347945	0.727882	NA
piR-30410	GXN_539998	piR-hsa-607	5.18	0.239945	0.413244	0.580637	0.561485	NA
piR-30411	GXN_540000	piR-hsa-608	0	NA	NA	NA	NA	NA
piR-30412	GXN_540001	piR-hsa-609	0.155943	0.501304	0.449012	1.11646	0.264225	NA
piR-30413	GXN_540002	piR-hsa-610	6.5546	-0.342253	0.368336	-0.929185	0.352793	NA
piR-30414	GXN_540003	piR-hsa-611	6.48776	0.488007	0.384237	1.27007	0.204061	NA
piR-30415	GXN_540004	piR-hsa-612	4.9512	-0.326736	0.404969	-0.806817	0.419772	NA
piR-30416	GXN_540005	piR-hsa-613	0.834993	-0.42635	0.561303	-0.759572	0.44751	NA
piR-30417	GXN_540006	piR-hsa-614	1.95786	0.41185	0.518149	0.794848	0.426702	NA
piR-30418	GXN_540007	piR-hsa-615	20.6295	0.396435	0.269779	1.46948	0.141701	0.381907
piR-30419	GXN_540008	piR-hsa-616	4.67785	0.351916	0.411701	0.854785	0.39267	NA
piR-30449	GXN_540009	piR-hsa-617	3.38297	-0.691592	0.470518	-1.46985	0.141602	NA
piR-30450	GXN_540010	piR-hsa-618	1.08438	-0.382589	0.551949	-0.69316	0.488209	NA
piR-30451	GXN_540012	piR-hsa-619	401.683	-1.10106	0.314779	-3.49787	0.000468985	0.00977605
piR-30452	GXN_540013	piR-hsa-620	50.045	1.43759	0.358111	4.01438	5.96014e-05	0.00210692
piR-30453	GXN_540014	piR-hsa-621	12.6426	0.339159	0.300406	1.129	0.258897	0.530505
piR-30454	GXN_540015	piR-hsa-622	2.13372	0.448503	0.521833	0.859476	0.390078	NA
piR-30455	GXN_540016	piR-hsa-623	0.230151	0.114953	0.49115	0.234048	0.814948	NA
piR-30456	GXN_540017	piR-hsa-624	3278.57	0.96917	0.275544	3.51729	0.000435972	0.00926409
piR-30457	GXN_540018	piR-hsa-625	1.47976	1.24882	0.549795	2.27143	0.0231207	NA
piR-30458	GXN_540019	piR-hsa-626	6.95042	0.682758	0.400829	1.70337	0.0884994	NA
piR-30459	GXN_540020	piR-hsa-627	13.9222	0.409925	0.367887	1.11427	0.265165	0.537973
piR-30460	GXN_540021	piR-hsa-628	1.87951	0.27623	0.529593	0.521589	0.601956	NA
piR-30461	GXN_540023	piR-hsa-629	85.5167	0.46966	0.232867	2.01686	0.0437102	0.193436
piR-30462	GXN_540024	piR-hsa-630	7.53396	0.390831	0.412692	0.947027	0.343625	NA
piR-30463	GXN_540025	piR-hsa-631	5.67019	0.279701	0.426202	0.656263	0.511655	NA
piR-30464	GXN_540026	piR-hsa-632	1.90683	0.442024	0.510993	0.865029	0.387023	NA
piR-30465	GXN_540027	piR-hsa-633	2.18296	-0.0297284	0.526534	-0.0564606	0.954975	NA
piR-30466	GXN_540028	piR-hsa-634	1.31458	-0.385815	0.557103	-0.692537	0.4886	NA
piR-30467	GXN_540029	piR-hsa-635	2.94311	0.110109	0.476131	0.231258	0.817115	NA
piR-30468	GXN_540030	piR-hsa-636	7.36672	-0.124458	0.444947	-0.279715	0.779696	NA
piR-30469	GXN_540031	piR-hsa-637	5.05924	-0.732385	0.394423	-1.85685	0.0633319	NA
piR-30470	GXN_540032	piR-hsa-638	2.92219	0.843008	0.547806	1.53888	0.123833	NA
piR-30471	GXN_540033	piR-hsa-639	1.2716	-0.617495	0.546688	-1.12952	0.258678	NA
piR-30472	GXN_540034	piR-hsa-640	9.42057	0.112591	0.331194	0.339954	0.733891	0.886843
piR-30473	GXN_540035	piR-hsa-641	0.0452613	0.109622	0.334128	0.328083	0.742849	NA
piR-30474	GXN_540036	piR-hsa-642	0.660035	0.47649	0.573932	0.830221	0.406414	NA
piR-30475	GXN_540037	piR-hsa-643	1.41811	-0.103372	0.558942	-0.184943	0.853274	NA
piR-30476	GXN_540038	piR-hsa-644	2.33242	-0.611428	0.531807	-1.14972	0.25026	NA
piR-30477	GXN_540039	piR-hsa-645	16.9248	-0.28909	0.304716	-0.948722	0.342762	0.614002
piR-30478	GXN_540040	piR-hsa-646	1.74445	-0.381002	0.53122	-0.717221	0.473238	NA
piR-30479	GXN_540041	piR-hsa-647	39.1561	-0.514655	0.561413	-0.916713	0.359293	0.628681
piR-30480	GXN_540042	piR-hsa-648	1.36583	-0.863654	0.554372	-1.5579	0.119258	NA
piR-30481	GXN_540044	piR-hsa-649	8.04941	0.154638	0.396702	0.389808	0.696678	0.866469
piR-30482	GXN_540045	piR-hsa-650	25.3806	0.150515	0.290035	0.518956	0.603791	0.810727
piR-30483	GXN_540046	piR-hsa-651	33.8588	-1.08816	0.262357	-4.14764	3.35923e-05	0.00139681
piR-30484	GXN_540047	piR-hsa-652	19.947	-0.015164	0.294554	-0.0514811	0.958942	0.986991
piR-30485	GXN_540048	piR-hsa-653	18.0252	0.690183	0.400609	1.72283	0.0849186	0.282853
piR-30486	GXN_540049	piR-hsa-654	3.28404	-0.702873	0.487568	-1.44159	0.149418	NA
piR-30487	GXN_540050	piR-hsa-655	55.6144	-1.34169	0.502611	-2.66944	0.00759774	0.0659301
piR-30488	GXN_540051	piR-hsa-656	9.37561	0.228957	0.348665	0.656666	0.511396	0.751228
piR-30489	GXN_540052	piR-hsa-657	2.63119	0.312277	0.484437	0.644617	0.519176	NA
piR-30490	GXN_540053	piR-hsa-658	0.864386	1.07469	0.570331	1.88433	0.05952	NA
piR-30491	GXN_540055	piR-hsa-659	3.43701	0.521238	0.460653	1.13152	0.257837	NA
piR-30492	GXN_540056	piR-hsa-660	1.84702	-0.208816	0.551308	-0.378764	0.704863	NA
piR-30493	GXN_540057	piR-hsa-661	28.3492	0.00906998	0.305494	0.0296895	0.976315	0.992736
piR-30494	GXN_540058	piR-hsa-662	13.9228	0.116937	0.318981	0.366597	0.71392	0.877358
piR-30495	GXN_540059	piR-hsa-663	0	NA	NA	NA	NA	NA
piR-30496	GXN_540060	piR-hsa-664	11.5652	-0.196893	0.339446	-0.580043	0.561886	0.779947
piR-30497	GXN_540061	piR-hsa-665	10.638	-0.384007	0.391199	-0.981617	0.326289	0.600374
piR-30498	GXN_540062	piR-hsa-666	87.4908	1.2174	0.466238	2.61111	0.00902494	0.0738851
piR-30499	GXN_540063	piR-hsa-667	1.46074	-0.192128	0.55973	-0.343252	0.731409	NA
piR-30500	GXN_540064	piR-hsa-668	0.46964	-0.636058	0.55932	-1.1372	0.255455	NA
piR-30501	GXN_540066	piR-hsa-669	0	NA	NA	NA	NA	NA
piR-30502	GXN_540067	piR-hsa-670	64.7283	1.00662	0.450031	2.23679	0.0253	0.139875
piR-30503	GXN_540068	piR-hsa-671	1.13566	-0.766578	0.556961	-1.37636	0.168711	NA
piR-30504	GXN_540069	piR-hsa-672	14811.9	-0.546861	0.337325	-1.62117	0.104982	0.320842
piR-30505	GXN_540070	piR-hsa-673	74728.5	-1.69627	0.346288	-4.89842	9.66105e-07	8.32696e-05
piR-30506	GXN_540071	piR-hsa-674	67623.6	-1.62993	0.341911	-4.76712	1.86875e-06	0.000137838
piR-30507	GXN_540072	piR-hsa-675	0	NA	NA	NA	NA	NA
piR-30508	GXN_540073	piR-hsa-676	5.16144	0.476741	0.403108	1.18266	0.236942	NA
piR-30509	GXN_540074	piR-hsa-677	0.426325	-0.526188	0.564284	-0.932487	0.351085	NA
piR-30510	GXN_540075	piR-hsa-678	1.89255	-0.125998	0.497622	-0.2532	0.800114	NA
piR-30511	GXN_540077	piR-hsa-679	7.54234	0.471927	0.441061	1.06998	0.284628	NA
piR-30512	GXN_540078	piR-hsa-680	1.07983	0.433159	0.566098	0.765166	0.444173	NA
piR-30513	GXN_540079	piR-hsa-681	459.25	0.347092	0.298787	1.16167	0.245369	0.51425
piR-30514	GXN_540080	piR-hsa-682	1.21204	0.836064	0.545602	1.53237	0.125431	NA
piR-30515	GXN_540081	piR-hsa-683	0.13558	-0.0579929	0.408819	-0.141855	0.887195	NA
[truncated: 31,510 more rows]
